# Supplementary material for: Par protein localization during the early development of Mnemiopsis leidyi suggests different modes of epithelial organization in the metazoa
Source: eLife journal article supplement (doi:10.7554/elife.54927), 2020-07-27
Supplement: fig2-figsupp9-data1 [file elife-54927-fig2-figsupp9-data1-v3.pzfx]

<?xml version="1.0" encoding="UTF-8"?><GraphPadPrismFile PrismXMLVersion="5.00">
<Created>
<OriginalVersion CreatedByProgram="GraphPad Prism" CreatedByVersion="8.4.0.455" Login="root" DateTime="2020-06-28T14:31:01+01:00"></OriginalVersion>
<MostRecentVersion CreatedByProgram="GraphPad Prism" CreatedByVersion="8.4.0.455" Login="root" DateTime="2020-07-04T20:29:19+01:00"></MostRecentVersion>
</Created>
<InfoSequence>
<Ref ID="Info0" Selected="1"></Ref>
</InfoSequence>
<Info ID="Info0">
<Title>Project info 1</Title>
<Notes></Notes>
<Constant><Name>Experiment Date</Name><Value>2020-06-28</Value></Constant>
<Constant><Name>Experiment ID</Name><Value></Value></Constant>
<Constant><Name>Notebook ID</Name><Value></Value></Constant>
<Constant><Name>Project</Name><Value></Value></Constant>
<Constant><Name>Experimenter</Name><Value></Value></Constant>
<Constant><Name>Protocol</Name><Value></Value></Constant>
</Info>

<TableSequence>

<Ref ID="Table0"></Ref>
<Ref ID="Table4"></Ref>
<Ref ID="Table11"></Ref>
<Ref ID="Table13"></Ref>
<Ref ID="Table15"></Ref>
<Ref ID="Table17"></Ref>
<Ref ID="Table19"></Ref>
<Ref ID="Table21"></Ref>
<Ref ID="Table23"></Ref>
<Ref ID="Table25"></Ref>
<Ref ID="Table27"></Ref>
<Ref ID="Table29"></Ref>
<Ref ID="Table31"></Ref>
<Ref ID="Table33"></Ref>
<Ref ID="Table35"></Ref>
<Ref ID="Table37" Selected="1"></Ref>
</TableSequence>
<Table ID="Table0" XFormat="numbers" YFormat="replicates" Replicates="1" TableType="XY" EVFormat="AsteriskAfterNumber">
<Title>1-cell</Title>
<RowTitlesColumn Width="36">
<Subcolumn>
<d>V</d>
<d></d>
<d></d>
<d></d>
<d></d>
<d></d>
<d></d>
<d></d>
<d></d>
<d></d>
<d></d>
<d></d>
<d></d>
<d></d>
<d></d>
<d></d>
<d></d>
<d></d>
<d></d>
<d>A</d>
</Subcolumn>
</RowTitlesColumn>
<XColumn Width="51" Subcolumns="1" Decimals="2">
<Title></Title>
<Subcolumn>
<d>0.05</d>
<d>0.1</d>
<d>0.15</d>
<d>0.2</d>
<d>0.25</d>
<d>0.3</d>
<d>0.35</d>
<d>0.4</d>
<d>0.45</d>
<d>0.5</d>
<d>0.55</d>
<d>0.6</d>
<d>0.65</d>
<d>0.7</d>
<d>0.75</d>
<d>0.8</d>
<d>0.85</d>
<d>0.9</d>
<d>0.95</d>
<d>1</d>
</Subcolumn>
</XColumn>
<XAdvancedColumn Version="1" Width="51" Decimals="2" Subcolumns="1">
<Title></Title>
<Subcolumn>
<d>0.05</d>
<d>0.1</d>
<d>0.15</d>
<d>0.2</d>
<d>0.25</d>
<d>0.3</d>
<d>0.35</d>
<d>0.4</d>
<d>0.45</d>
<d>0.5</d>
<d>0.55</d>
<d>0.6</d>
<d>0.65</d>
<d>0.7</d>
<d>0.75</d>
<d>0.8</d>
<d>0.85</d>
<d>0.9</d>
<d>0.95</d>
<d>1</d>
</Subcolumn>
</XAdvancedColumn>
<YColumn Width="84" Decimals="9" Subcolumns="1">
<Title></Title>
<Subcolumn>
<d>0.35557081</d>
<d>0.49321266</d>
<d>0.414856988</d>
<d>0.35067308</d>
<d>0.313216186</d>
<d>0.37639545</d>
<d>0.431096855</d>
<d>0.570733877</d>
<d>0.635028428</d>
<d>0.628965225</d>
<d>0.621255208</d>
<d>0.632096219</d>
<d>0.658431676</d>
<d>0.77303334</d>
<d>0.807130318</d>
<d>0.827499974</d>
<d>0.922352136</d>
<d>0.938695417</d>
<d>0.959809518</d>
<d>0.91925146</d>
</Subcolumn>
</YColumn>
<YColumn Width="84" Decimals="9" Subcolumns="1">
<Title></Title>
<Subcolumn>
<d>0.692549335</d>
<d>0.606976578</d>
<d>0.68678946</d>
<d>0.746598149</d>
<d>0.764890632</d>
<d>0.798573244</d>
<d>0.774806489</d>
<d>0.818742772</d>
<d>0.785761829</d>
<d>0.731942547</d>
<d>0.687868494</d>
<d>0.7016959</d>
<d>0.697060416</d>
<d>0.672398347</d>
<d>0.666944681</d>
<d>0.672304266</d>
<d>0.675017462</d>
<d>0.660560002</d>
<d>0.667911872</d>
<d>0.856342102</d>
</Subcolumn>
</YColumn>
<YColumn Width="84" Decimals="9" Subcolumns="1">
<Title></Title>
<Subcolumn>
<d>0.769601045</d>
<d>0.726820452</d>
<d>0.66183033</d>
<d>0.714792619</d>
<d>0.732007079</d>
<d>0.752726661</d>
<d>0.69352632</d>
<d>0.613970843</d>
<d>0.59982628</d>
<d>0.60954907</d>
<d>0.598073903</d>
<d>0.567989933</d>
<d>0.570331307</d>
<d>0.586774962</d>
<d>0.607454459</d>
<d>0.651826554</d>
<d>0.630204472</d>
<d>0.736703244</d>
<d>0.924341848</d>
<d>0.931319298</d>
</Subcolumn>
</YColumn>
<YColumn Width="84" Decimals="9" Subcolumns="1">
<Title></Title>
<Subcolumn>
<d>0.22001104</d>
<d>0.203063301</d>
<d>0.220975688</d>
<d>0.333676264</d>
<d>0.248842998</d>
<d>0.179097737</d>
<d>0.189987868</d>
<d>0.187951882</d>
<d>0.234588249</d>
<d>0.28281448</d>
<d>0.328594115</d>
<d>0.30662516</d>
<d>0.289215082</d>
<d>0.247254763</d>
<d>0.207113868</d>
<d>0.234353688</d>
<d>0.274191675</d>
<d>0.347857626</d>
<d>0.42744176</d>
<d>0.720637095</d>
</Subcolumn>
</YColumn>
</Table>
<Table ID="Table4" XFormat="numbers" YFormat="replicates" Replicates="1" TableType="XY" EVFormat="AsteriskAfterNumber">
<Title>2-cell</Title>
<RowTitlesColumn Width="84">
<Subcolumn></Subcolumn>
</RowTitlesColumn>
<XColumn Width="51" Subcolumns="1" Decimals="2">
<Title></Title>
<Subcolumn>
<d>0.05</d>
<d>0.1</d>
<d>0.15</d>
<d>0.2</d>
<d>0.25</d>
<d>0.3</d>
<d>0.35</d>
<d>0.4</d>
<d>0.45</d>
<d>0.5</d>
<d>0.55</d>
<d>0.6</d>
<d>0.65</d>
<d>0.7</d>
<d>0.75</d>
<d>0.8</d>
<d>0.85</d>
<d>0.9</d>
<d>0.95</d>
<d>1</d>
</Subcolumn>
</XColumn>
<XAdvancedColumn Version="1" Width="51" Decimals="2" Subcolumns="1">
<Title></Title>
<Subcolumn>
<d>0.05</d>
<d>0.1</d>
<d>0.15</d>
<d>0.2</d>
<d>0.25</d>
<d>0.3</d>
<d>0.35</d>
<d>0.4</d>
<d>0.45</d>
<d>0.5</d>
<d>0.55</d>
<d>0.6</d>
<d>0.65</d>
<d>0.7</d>
<d>0.75</d>
<d>0.8</d>
<d>0.85</d>
<d>0.9</d>
<d>0.95</d>
<d>1</d>
</Subcolumn>
</XAdvancedColumn>
<YColumn Width="84" Decimals="9" Subcolumns="1">
<Title></Title>
<Subcolumn>
<d>0.64110768</d>
<d>0.514929203</d>
<d>0.425791996</d>
<d>0.347862435</d>
<d>0.181124322</d>
<d>0.072815169</d>
<d>0.141822009</d>
<d>0.11123732</d>
<d>0.045900137</d>
<d>0.033651393</d>
<d>0.039862732</d>
<d>0.039049596</d>
<d>0.034150044</d>
<d>0.038738423</d>
<d>0.058460055</d>
<d>0.127351348</d>
<d>0.492754745</d>
<d>0.494163833</d>
<d>0.532850265</d>
<d>0.8001671</d>
</Subcolumn>
</YColumn>
<YColumn Width="84" Decimals="9" Subcolumns="1">
<Title></Title>
<Subcolumn>
<d>0.228201657</d>
<d>0.309390771</d>
<d>0.346867088</d>
<d>0.412353498</d>
<d>0.416263141</d>
<d>0.444208918</d>
<d>0.449596335</d>
<d>0.465545772</d>
<d>0.462117293</d>
<d>0.448408603</d>
<d>0.440070589</d>
<d>0.483045221</d>
<d>0.397211478</d>
<d>0.393954872</d>
<d>0.431285106</d>
<d>0.372615594</d>
<d>0.369786514</d>
<d>0.378690189</d>
<d>0.408183967</d>
<d>0.496216069</d>
</Subcolumn>
</YColumn>
<YColumn Width="84" Decimals="9" Subcolumns="1">
<Title></Title>
<Subcolumn>
<d>0.379186058</d>
<d>0.345240751</d>
<d>0.381101194</d>
<d>0.500077314</d>
<d>0.543423176</d>
<d>0.511765005</d>
<d>0.527841796</d>
<d>0.601718157</d>
<d>0.62619463</d>
<d>0.574049863</d>
<d>0.54755912</d>
<d>0.534933016</d>
<d>0.467456244</d>
<d>0.43205071</d>
<d>0.47309754</d>
<d>0.426433816</d>
<d>0.364150642</d>
<d>0.446129757</d>
<d>0.577354049</d>
<d>0.757761601</d>
</Subcolumn>
</YColumn>
</Table>
<Table ID="Table11" XFormat="numbers" YFormat="replicates" Replicates="1" TableType="XY" EVFormat="AsteriskAfterNumber">
<Title>4-cell</Title>
<RowTitlesColumn Width="32">
<Subcolumn></Subcolumn>
</RowTitlesColumn>
<XColumn Width="51" Subcolumns="1" Decimals="2">
<Title></Title>
<Subcolumn>
<d>0.05</d>
<d>0.1</d>
<d>0.15</d>
<d>0.2</d>
<d>0.25</d>
<d>0.3</d>
<d>0.35</d>
<d>0.4</d>
<d>0.45</d>
<d>0.5</d>
<d>0.55</d>
<d>0.6</d>
<d>0.65</d>
<d>0.7</d>
<d>0.75</d>
<d>0.8</d>
<d>0.85</d>
<d>0.9</d>
<d>0.95</d>
<d>1</d>
</Subcolumn>
</XColumn>
<XAdvancedColumn Version="1" Width="51" Decimals="2" Subcolumns="1">
<Title></Title>
<Subcolumn>
<d>0.05</d>
<d>0.1</d>
<d>0.15</d>
<d>0.2</d>
<d>0.25</d>
<d>0.3</d>
<d>0.35</d>
<d>0.4</d>
<d>0.45</d>
<d>0.5</d>
<d>0.55</d>
<d>0.6</d>
<d>0.65</d>
<d>0.7</d>
<d>0.75</d>
<d>0.8</d>
<d>0.85</d>
<d>0.9</d>
<d>0.95</d>
<d>1</d>
</Subcolumn>
</XAdvancedColumn>
<YColumn Width="84" Decimals="9" Subcolumns="1">
<Title></Title>
<Subcolumn>
<d>0.128012769</d>
<d>0.199817717</d>
<d>0.266361251</d>
<d>0.236844378</d>
<d>0.210652394</d>
<d>0.075128719</d>
<d>0.032980617</d>
<d>0.026542568</d>
<d>0.028959127</d>
<d>0.023029535</d>
<d>0.010298006</d>
<d>0.01217224</d>
<d>0.007187991</d>
<d>0.011263185</d>
<d>0.023133888</d>
<d>0.115499803</d>
<d>0.333671751</d>
<d>0.395317396</d>
<d>0.658807666</d>
<d>0.956840771</d>
</Subcolumn>
</YColumn>
<YColumn Width="84" Decimals="9" Subcolumns="1">
<Title></Title>
<Subcolumn>
<d>0.578481412</d>
<d>0.599501689</d>
<d>0.572083333</d>
<d>0.544598295</d>
<d>0.549728125</d>
<d>0.55664457</d>
<d>0.545824703</d>
<d>0.550551886</d>
<d>0.546757279</d>
<d>0.469646076</d>
<d>0.334934109</d>
<d>0.278462392</d>
<d>0.224878972</d>
<d>0.196545228</d>
<d>0.157921855</d>
<d>0.258704735</d>
<d>0.286798106</d>
<d>0.334441465</d>
<d>0.361723901</d>
<d>0.714784195</d>
</Subcolumn>
</YColumn>
<YColumn Width="84" Decimals="9" Subcolumns="1">
<Title></Title>
<Subcolumn>
<d>0.455060072</d>
<d>0.178527786</d>
<d>0.063358366</d>
<d>0.056865961</d>
<d>0.0664379</d>
<d>0.058512781</d>
<d>0.085273751</d>
<d>0.237822569</d>
<d>0.265760123</d>
<d>0.344979305</d>
<d>0.311234592</d>
<d>0.298916232</d>
<d>0.323286294</d>
<d>0.306898549</d>
<d>0.301301461</d>
<d>0.347852337</d>
<d>0.391411639</d>
<d>0.44882908</d>
<d>0.571241609</d>
<d>0.776801509</d>
</Subcolumn>
</YColumn>
<YColumn Width="84" Decimals="9" Subcolumns="1">
<Title></Title>
<Subcolumn>
<d>0.186799345</d>
<d>0.16091187</d>
<d>0.161075159</d>
<d>0.151954014</d>
<d>0.087806407</d>
<d>0.134492574</d>
<d>0.187702451</d>
<d>0.170656372</d>
<d>0.188807957</d>
<d>0.189549495</d>
<d>0.171520151</d>
<d>0.152150747</d>
<d>0.237626713</d>
<d>0.26594789</d>
<d>0.282296879</d>
<d>0.311396237</d>
<d>0.333967954</d>
<d>0.491200426</d>
<d>0.451946542</d>
<d>0.761698034</d>
</Subcolumn>
</YColumn>
<YColumn Width="84" Decimals="9" Subcolumns="1">
<Title></Title>
<Subcolumn>
<d>0.470288894</d>
<d>0.374318773</d>
<d>0.347974603</d>
<d>0.37887172</d>
<d>0.322059804</d>
<d>0.044404046</d>
<d>0.024948737</d>
<d>0.017562976</d>
<d>0.004433475</d>
<d>0.004538849</d>
<d>0.005985231</d>
<d>0.006052562</d>
<d>0.013312579</d>
<d>0.019693467</d>
<d>0.038497515</d>
<d>0.077183694</d>
<d>0.183696677</d>
<d>0.30358859</d>
<d>0.524805744</d>
<d>0.643218398</d>
</Subcolumn>
</YColumn>
</Table>
<Table ID="Table13" XFormat="numbers" YFormat="replicates" Replicates="1" TableType="XY" EVFormat="AsteriskAfterNumber">
<Title>8-cells</Title>
<RowTitlesColumn Width="84">
<Subcolumn></Subcolumn>
</RowTitlesColumn>
<XColumn Width="51" Subcolumns="1" Decimals="2">
<Title></Title>
<Subcolumn>
<d>0.05</d>
<d>0.1</d>
<d>0.15</d>
<d>0.2</d>
<d>0.25</d>
<d>0.3</d>
<d>0.35</d>
<d>0.4</d>
<d>0.45</d>
<d>0.5</d>
<d>0.55</d>
<d>0.6</d>
<d>0.65</d>
<d>0.7</d>
<d>0.75</d>
<d>0.8</d>
<d>0.85</d>
<d>0.9</d>
<d>0.95</d>
<d>1</d>
</Subcolumn>
</XColumn>
<XAdvancedColumn Version="1" Width="51" Decimals="2" Subcolumns="1">
<Title></Title>
<Subcolumn>
<d>0.05</d>
<d>0.1</d>
<d>0.15</d>
<d>0.2</d>
<d>0.25</d>
<d>0.3</d>
<d>0.35</d>
<d>0.4</d>
<d>0.45</d>
<d>0.5</d>
<d>0.55</d>
<d>0.6</d>
<d>0.65</d>
<d>0.7</d>
<d>0.75</d>
<d>0.8</d>
<d>0.85</d>
<d>0.9</d>
<d>0.95</d>
<d>1</d>
</Subcolumn>
</XAdvancedColumn>
<YColumn Width="84" Decimals="9" Subcolumns="1">
<Title></Title>
<Subcolumn>
<d>0.539209586</d>
<d>0.437581995</d>
<d>0.371463396</d>
<d>0.365706708</d>
<d>0.338215757</d>
<d>0.286460147</d>
<d>0.268951612</d>
<d>0.268612349</d>
<d>0.308252149</d>
<d>0.322920488</d>
<d>0.319947075</d>
<d>0.336227391</d>
<d>0.402706118</d>
<d>0.401517296</d>
<d>0.448066274</d>
<d>0.463274451</d>
<d>0.502564759</d>
<d>0.526442122</d>
<d>0.629657002</d>
<d>0.893806734</d>
</Subcolumn>
</YColumn>
<YColumn Width="84" Decimals="9" Subcolumns="1">
<Title></Title>
<Subcolumn>
<d>0.461748243</d>
<d>0.427221989</d>
<d>0.351504389</d>
<d>0.291349593</d>
<d>0.266346896</d>
<d>0.254282211</d>
<d>0.284769605</d>
<d>0.263027007</d>
<d>0.248000127</d>
<d>0.288741526</d>
<d>0.283489392</d>
<d>0.234851627</d>
<d>0.27006409</d>
<d>0.274025808</d>
<d>0.328705862</d>
<d>0.367471763</d>
<d>0.423679337</d>
<d>0.504802535</d>
<d>0.59456805</d>
<d>0.838505167</d>
</Subcolumn>
</YColumn>
<YColumn Width="84" Decimals="9" Subcolumns="1">
<Title></Title>
<Subcolumn>
<d>0.398240751</d>
<d>0.402439583</d>
<d>0.454451462</d>
<d>0.407585451</d>
<d>0.447287825</d>
<d>0.431958539</d>
<d>0.43469722</d>
<d>0.447655644</d>
<d>0.476362387</d>
<d>0.376168169</d>
<d>0.401752704</d>
<d>0.383157878</d>
<d>0.414709001</d>
<d>0.435969697</d>
<d>0.496782565</d>
<d>0.523189129</d>
<d>0.592024314</d>
<d>0.64195543</d>
<d>0.816774874</d>
<d>0.889874953</d>
</Subcolumn>
</YColumn>
<YColumn Width="84" Decimals="9" Subcolumns="1">
<Title></Title>
<Subcolumn>
<d>0.524162993</d>
<d>0.517935185</d>
<d>0.399351555</d>
<d>0.307372205</d>
<d>0.287404984</d>
<d>0.180010348</d>
<d>0.17732152</d>
<d>0.166337703</d>
<d>0.233895041</d>
<d>0.182830373</d>
<d>0.103897406</d>
<d>0.04464647</d>
<d>0.22266614</d>
<d>0.123213537</d>
<d>0.108678264</d>
<d>0.187387412</d>
<d>0.377101245</d>
<d>0.412427468</d>
<d>0.465936286</d>
</Subcolumn>
</YColumn>
<YColumn Width="84" Decimals="9" Subcolumns="1">
<Title></Title>
<Subcolumn>
<d>0.442589299</d>
<d>0.301234907</d>
<d>0.211017333</d>
<d>0.204254722</d>
<d>0.097673638</d>
<d>0.042944571</d>
<d>0.040485173</d>
<d>0.025582125</d>
<d>0.022081823</d>
<d>0.017208121</d>
<d>0.02057409</d>
<d>0.02775275</d>
<d>0.096720713</d>
<d>0.124396586</d>
<d>0.204485313</d>
<d>0.231917128</d>
<d>0.241416084</d>
<d>0.269661873</d>
<d>0.358207279</d>
<d>0.646203996</d>
</Subcolumn>
</YColumn>
<YColumn Width="84" Decimals="9" Subcolumns="1">
<Title></Title>
<Subcolumn>
<d>0.426785852</d>
<d>0.301297526</d>
<d>0.148834044</d>
<d>0.039519073</d>
<d>0.056255451</d>
<d>0.056846806</d>
<d>0.109210678</d>
<d>0.258983214</d>
<d>0.05897126</d>
<d>0.026135897</d>
<d>0.045453652</d>
<d>0.24909396</d>
<d>0.279551689</d>
<d>0.36943088</d>
<d>0.371490503</d>
<d>0.27566647</d>
<d>0.317370708</d>
<d>0.436608902</d>
<d>0.512470512</d>
</Subcolumn>
</YColumn>
<YColumn Width="84" Decimals="9" Subcolumns="1">
<Title></Title>
<Subcolumn>
<d>0.250035393</d>
<d>0.025277441</d>
<d>0.004689189</d>
<d>0.007813431</d>
<d>0.016885714</d>
<d>0.008958908</d>
<d>0.007589079</d>
<d>0.012953668</d>
<d>0.020954826</d>
<d>0.269569498</d>
<d>0.387297435</d>
<d>0.444159129</d>
<d>0.43684852</d>
<d>0.388438224</d>
<d>0.221681329</d>
<d>0.501345284</d>
<d>0.320044273</d>
<d>0.364125896</d>
<d>0.544637617</d>
<d>0.718741055</d>
</Subcolumn>
</YColumn>
<YColumn Width="84" Decimals="9" Subcolumns="1">
<Title></Title>
<Subcolumn>
<d>0.440495941</d>
<d>0.229198296</d>
<d>0.120201357</d>
<d>0.050888119</d>
<d>0.072554011</d>
<d>0.062227791</d>
<d>0.053137783</d>
<d>0.047180338</d>
<d>0.048050646</d>
<d>0.128001403</d>
<d>0.458613394</d>
<d>0.471923928</d>
<d>0.548246597</d>
<d>0.577219313</d>
<d>0.46776293</d>
<d>0.498734283</d>
<d>0.170288722</d>
<d>0.51308356</d>
<d>0.580752387</d>
<d>0.681457577</d>
</Subcolumn>
</YColumn>
<YColumn Width="84" Decimals="9" Subcolumns="1">
<Title></Title>
<Subcolumn>
<d>0.587926978</d>
<d>0.588448753</d>
<d>0.582938054</d>
<d>0.473930449</d>
<d>0.53261133</d>
<d>0.485248585</d>
<d>0.545281934</d>
<d>0.551333021</d>
<d>0.523070877</d>
<d>0.476798011</d>
<d>0.568561375</d>
<d>0.49130228</d>
<d>0.486438402</d>
<d>0.495373381</d>
<d>0.639704035</d>
<d>0.644415697</d>
<d>0.667700355</d>
<d>0.664957722</d>
<d>0.741544822</d>
<d>0.841644617</d>
</Subcolumn>
</YColumn>
<YColumn Width="84" Decimals="9" Subcolumns="1">
<Title></Title>
<Subcolumn>
<d>0.599485802</d>
<d>0.645822663</d>
<d>0.615594268</d>
<d>0.654075573</d>
<d>0.657713316</d>
<d>0.65656358</d>
<d>0.5918</d>
<d>0.587802469</d>
<d>0.590441235</d>
<d>0.597046737</d>
<d>0.546650882</d>
<d>0.519279982</d>
<d>0.495732011</d>
<d>0.520090741</d>
<d>0.526519577</d>
<d>0.541187302</d>
<d>0.555505115</d>
<d>0.576201146</d>
<d>0.703108554</d>
<d>0.820570723</d>
</Subcolumn>
</YColumn>
<YColumn Width="84" Decimals="9" Subcolumns="1">
<Title></Title>
<Subcolumn>
<d>0.350745757</d>
<d>0.368805246</d>
<d>0.362621899</d>
<d>0.311504134</d>
<d>0.410246764</d>
<d>0.350140065</d>
<d>0.358172194</d>
<d>0.354762609</d>
<d>0.280809713</d>
<d>0.335117218</d>
<d>0.35568969</d>
<d>0.371994068</d>
<d>0.375660746</d>
<d>0.32983629</d>
<d>0.401397312</d>
<d>0.410099473</d>
<d>0.404358919</d>
<d>0.432879638</d>
<d>0.616905457</d>
<d>0.734479338</d>
</Subcolumn>
</YColumn>
<YColumn Width="84" Decimals="9" Subcolumns="1">
<Title></Title>
<Subcolumn>
<d>0.312837337</d>
<d>0.306667637</d>
<d>0.302629803</d>
<d>0.231717989</d>
<d>0.181093</d>
<d>0.230956729</d>
<d>0.251437725</d>
<d>0.179246401</d>
<d>0.208215428</d>
<d>0.187454513</d>
<d>0.15776909</d>
<d>0.304308452</d>
<d>0.115719245</d>
<d>0.220952128</d>
<d>0.252222338</d>
<d>0.262613269</d>
<d>0.301961603</d>
<d>0.352915151</d>
<d>0.496935128</d>
<d>0.772111524</d>
</Subcolumn>
</YColumn>
</Table>
<Table ID="Table15" XFormat="numbers" YFormat="replicates" Replicates="1" TableType="XY" EVFormat="AsteriskAfterNumber">
<Title>16-cells</Title>
<RowTitlesColumn Width="32">
<Subcolumn></Subcolumn>
</RowTitlesColumn>
<XColumn Width="51" Subcolumns="1" Decimals="2">
<Title></Title>
<Subcolumn>
<d>0.05</d>
<d>0.1</d>
<d>0.15</d>
<d>0.2</d>
<d>0.25</d>
<d>0.3</d>
<d>0.35</d>
<d>0.4</d>
<d>0.45</d>
<d>0.5</d>
<d>0.55</d>
<d>0.6</d>
<d>0.65</d>
<d>0.7</d>
<d>0.75</d>
<d>0.8</d>
<d>0.85</d>
<d>0.9</d>
<d>0.95</d>
<d>1</d>
</Subcolumn>
</XColumn>
<XAdvancedColumn Version="1" Width="51" Decimals="2" Subcolumns="1">
<Title></Title>
<Subcolumn>
<d>0.05</d>
<d>0.1</d>
<d>0.15</d>
<d>0.2</d>
<d>0.25</d>
<d>0.3</d>
<d>0.35</d>
<d>0.4</d>
<d>0.45</d>
<d>0.5</d>
<d>0.55</d>
<d>0.6</d>
<d>0.65</d>
<d>0.7</d>
<d>0.75</d>
<d>0.8</d>
<d>0.85</d>
<d>0.9</d>
<d>0.95</d>
<d>1</d>
</Subcolumn>
</XAdvancedColumn>
<YColumn Width="84" Decimals="9" Subcolumns="1">
<Title></Title>
<Subcolumn>
<d>0.465007723</d>
<d>0.372333717</d>
<d>0.202675459</d>
<d>0.109208633</d>
<d>0.31415178</d>
<d>0.417067753</d>
<d>0.226454464</d>
<d>0.373477182</d>
<d>0.36773571</d>
<d>0.458506624</d>
<d>0.382924834</d>
<d>0.401036938</d>
<d>0.452490325</d>
<d>0.427135779</d>
<d>0.446744023</d>
<d>0.436799421</d>
<d>0.406944993</d>
<d>0.460552304</d>
<d>0.569931199</d>
<d>0.737905077</d>
</Subcolumn>
</YColumn>
<YColumn Width="84" Decimals="9" Subcolumns="1">
<Title></Title>
<Subcolumn>
<d>0.474202358</d>
<d>0.451416582</d>
<d>0.450346191</d>
<d>0.36223276</d>
<d>0.350011946</d>
<d>0.347145665</d>
<d>0.34021917</d>
<d>0.347827403</d>
<d>0.313639966</d>
<d>0.378230659</d>
<d>0.351369035</d>
<d>0.3571411</d>
<d>0.343863056</d>
<d>0.351409077</d>
<d>0.351178612</d>
<d>0.401847695</d>
<d>0.432669709</d>
<d>0.491964622</d>
<d>0.559658942</d>
<d>0.853330833</d>
</Subcolumn>
</YColumn>
<YColumn Width="84" Decimals="9" Subcolumns="1">
<Title></Title>
<Subcolumn>
<d>0.513414971</d>
<d>0.462008803</d>
<d>0.398367048</d>
<d>0.346541735</d>
<d>0.302615874</d>
<d>0.288958455</d>
<d>0.358901592</d>
<d>0.33088565</d>
<d>0.314634357</d>
<d>0.327956949</d>
<d>0.303235018</d>
<d>0.220836883</d>
<d>0.275146162</d>
<d>0.261751918</d>
<d>0.213374862</d>
<d>0.322819445</d>
<d>0.312750878</d>
<d>0.341544762</d>
<d>0.52494465</d>
<d>0.76203962</d>
</Subcolumn>
</YColumn>
<YColumn Width="84" Decimals="9" Subcolumns="1">
<Title></Title>
<Subcolumn>
<d>0.252780664</d>
<d>0.405390948</d>
<d>0.379636563</d>
<d>0.16474892</d>
<d>0.219679694</d>
<d>0.312829386</d>
<d>0.26162047</d>
<d>0.221412551</d>
<d>0.306066267</d>
<d>0.18651953</d>
<d>0.297444492</d>
<d>0.254633985</d>
<d>0.240045133</d>
<d>0.262100487</d>
<d>0.321601442</d>
<d>0.333491958</d>
<d>0.301545021</d>
<d>0.310370709</d>
<d>0.251089177</d>
<d>0.735099295</d>
</Subcolumn>
</YColumn>
<YColumn Width="84" Decimals="9" Subcolumns="1">
<Title></Title>
<Subcolumn>
<d>0.484795784</d>
<d>0.465286135</d>
<d>0.431705628</d>
<d>0.359262976</d>
<d>0.331731923</d>
<d>0.286786847</d>
<d>0.352009621</d>
<d>0.316205138</d>
<d>0.272333201</d>
<d>0.245850609</d>
<d>0.263055853</d>
<d>0.338114713</d>
<d>0.338076421</d>
<d>0.341132437</d>
<d>0.322374355</d>
<d>0.399085119</d>
<d>0.457987497</d>
<d>0.554791187</d>
<d>0.629258527</d>
<d>0.84411173</d>
</Subcolumn>
</YColumn>
<YColumn Width="84" Decimals="9" Subcolumns="1">
<Title></Title>
<Subcolumn>
<d>0.585926122</d>
<d>0.544879515</d>
<d>0.402967394</d>
<d>0.402011653</d>
<d>0.522646288</d>
<d>0.429832825</d>
<d>0.433839894</d>
<d>0.276578239</d>
<d>0.368389252</d>
<d>0.366784845</d>
<d>0.459562062</d>
<d>0.468192476</d>
<d>0.433443445</d>
<d>0.345515884</d>
<d>0.367882025</d>
<d>0.484820688</d>
<d>0.499894953</d>
<d>0.538736883</d>
<d>0.697204621</d>
<d>0.939038894</d>
</Subcolumn>
</YColumn>
<YColumn Width="84" Decimals="9" Subcolumns="1">
<Title></Title>
<Subcolumn>
<d>0.456255854</d>
<d>0.436481235</d>
<d>0.427573557</d>
<d>0.400037397</d>
<d>0.339293551</d>
<d>0.488670045</d>
<d>0.255495087</d>
<d>0.313820614</d>
<d>0.491209658</d>
<d>0.443732036</d>
<d>0.405334278</d>
<d>0.389845389</d>
<d>0.464211584</d>
<d>0.226916433</d>
<d>0.461528516</d>
<d>0.338526333</d>
<d>0.424447777</d>
<d>0.501552878</d>
<d>0.460840406</d>
<d>0.760501021</d>
</Subcolumn>
</YColumn>
<YColumn Width="84" Decimals="9" Subcolumns="1">
<Title></Title>
<Subcolumn>
<d>0.401452517</d>
<d>0.36490491</d>
<d>0.288505033</d>
<d>0.340913841</d>
<d>0.245073726</d>
<d>0.409590621</d>
<d>0.347423616</d>
<d>0.303277575</d>
<d>0.278718244</d>
<d>0.16690526</d>
<d>0.351368611</d>
<d>0.302740976</d>
<d>0.443569197</d>
<d>0.444492379</d>
<d>0.499659596</d>
<d>0.46666564</d>
<d>0.4834614</d>
<d>0.527702095</d>
<d>0.757717291</d>
<d>0.838197157</d>
</Subcolumn>
</YColumn>
</Table>
<Table ID="Table17" XFormat="numbers" YFormat="replicates" Replicates="1" TableType="XY" EVFormat="AsteriskAfterNumber">
<Title>32-cells</Title>
<RowTitlesColumn Width="84">
<Subcolumn></Subcolumn>
</RowTitlesColumn>
<XColumn Width="51" Subcolumns="1" Decimals="2">
<Title></Title>
<Subcolumn>
<d>0.05</d>
<d>0.1</d>
<d>0.15</d>
<d>0.2</d>
<d>0.25</d>
<d>0.3</d>
<d>0.35</d>
<d>0.4</d>
<d>0.45</d>
<d>0.5</d>
<d>0.55</d>
<d>0.6</d>
<d>0.65</d>
<d>0.7</d>
<d>0.75</d>
<d>0.8</d>
<d>0.85</d>
<d>0.9</d>
<d>0.95</d>
<d>1</d>
</Subcolumn>
</XColumn>
<XAdvancedColumn Version="1" Width="51" Decimals="2" Subcolumns="1">
<Title></Title>
<Subcolumn>
<d>0.05</d>
<d>0.1</d>
<d>0.15</d>
<d>0.2</d>
<d>0.25</d>
<d>0.3</d>
<d>0.35</d>
<d>0.4</d>
<d>0.45</d>
<d>0.5</d>
<d>0.55</d>
<d>0.6</d>
<d>0.65</d>
<d>0.7</d>
<d>0.75</d>
<d>0.8</d>
<d>0.85</d>
<d>0.9</d>
<d>0.95</d>
<d>1</d>
</Subcolumn>
</XAdvancedColumn>
<YColumn Width="84" Decimals="9" Subcolumns="1">
<Title></Title>
<Subcolumn>
<d>0.48310362</d>
<d>0.482793258</d>
<d>0.419261423</d>
<d>0.342679276</d>
<d>0.340067697</d>
<d>0.381734956</d>
<d>0.354149813</d>
<d>0.275530212</d>
<d>0.301533833</d>
<d>0.30091573</d>
<d>0.304321067</d>
<d>0.283140949</d>
<d>0.33452834</d>
<d>0.37567191</d>
<d>0.406450281</d>
<d>0.385329463</d>
<d>0.409288889</d>
<d>0.711311236</d>
<d>0.874090012</d>
<d>0.802573997</d>
</Subcolumn>
</YColumn>
<YColumn Width="84" Decimals="9" Subcolumns="1">
<Title></Title>
<Subcolumn>
<d>0.533830529</d>
<d>0.546001234</d>
<d>0.46405939</d>
<d>0.376446945</d>
<d>0.311739205</d>
<d>0.330651572</d>
<d>0.302861449</d>
<d>0.327366933</d>
<d>0.317619016</d>
<d>0.280726344</d>
<d>0.32349822</d>
<d>0.350700186</d>
<d>0.373476257</d>
<d>0.365099334</d>
<d>0.436972069</d>
<d>0.437220085</d>
<d>0.737192381</d>
<d>0.610306774</d>
<d>0.641191597</d>
</Subcolumn>
</YColumn>
<YColumn Width="84" Decimals="9" Subcolumns="1">
<Title></Title>
<Subcolumn>
<d>0.67889499</d>
<d>0.609601071</d>
<d>0.574508051</d>
<d>0.543414113</d>
<d>0.504188384</d>
<d>0.430140545</d>
<d>0.454583117</d>
<d>0.391919192</d>
<d>0.372699618</d>
<d>0.373353284</d>
<d>0.417202385</d>
<d>0.394883963</d>
<d>0.388058275</d>
<d>0.384612289</d>
<d>0.420799365</d>
<d>0.476662653</d>
<d>0.442847566</d>
<d>0.537138725</d>
<d>0.709823708</d>
<d>0.8423232</d>
</Subcolumn>
</YColumn>
<YColumn Width="84" Decimals="9" Subcolumns="1">
<Title></Title>
<Subcolumn>
<d>0.412793148</d>
<d>0.474791138</d>
<d>0.536767784</d>
<d>0.48000373</d>
<d>0.456153345</d>
<d>0.448956112</d>
<d>0.418712705</d>
<d>0.410084184</d>
<d>0.469594868</d>
<d>0.422651178</d>
<d>0.446311751</d>
<d>0.559995658</d>
<d>0.55317942</d>
</Subcolumn>
</YColumn>
<YColumn Width="84" Decimals="9" Subcolumns="1">
<Title></Title>
<Subcolumn>
<d>0.598306228</d>
<d>0.631534149</d>
<d>0.468157177</d>
<d>0.341652751</d>
<d>0.32551474</d>
<d>0.350331005</d>
<d>0.329478104</d>
<d>0.289632127</d>
<d>0.328785871</d>
<d>0.313538377</d>
<d>0.332947629</d>
<d>0.351853334</d>
<d>0.358894468</d>
<d>0.36693666</d>
<d>0.422975169</d>
<d>0.392101488</d>
<d>0.488790034</d>
</Subcolumn>
</YColumn>
<YColumn Width="84" Decimals="9" Subcolumns="1">
<Title></Title>
<Subcolumn>
<d>0.659770398</d>
<d>0.700048377</d>
<d>0.633687646</d>
<d>0.676092251</d>
<d>0.667462083</d>
<d>0.594692646</d>
<d>0.593615169</d>
<d>0.631351791</d>
<d>0.563990204</d>
<d>0.563809715</d>
<d>0.548085919</d>
<d>0.572196806</d>
<d>0.631613927</d>
<d>0.600827326</d>
<d>0.538840239</d>
<d>0.548642589</d>
<d>0.676136648</d>
<d>0.680512675</d>
<d>0.872213724</d>
<d>0.851937267</d>
</Subcolumn>
</YColumn>
<YColumn Width="84" Decimals="9" Subcolumns="1">
<Title></Title>
<Subcolumn>
<d>0.568698596</d>
<d>0.480247618</d>
<d>0.471686058</d>
<d>0.451040437</d>
<d>0.222861884</d>
<d>0.442830019</d>
<d>0.397211955</d>
<d>0.414494356</d>
<d>0.340678418</d>
<d>0.215796068</d>
<d>0.545685486</d>
<d>0.530463778</d>
<d>0.275015657</d>
<d>0.417881559</d>
<d>0.55787068</d>
<d>0.517091671</d>
<d>0.63672319</d>
<d>0.635968417</d>
<d>0.691764829</d>
<d>0.84045666</d>
</Subcolumn>
</YColumn>
<YColumn Width="84" Decimals="9" Subcolumns="1">
<Title></Title>
<Subcolumn>
<d>0.619399391</d>
<d>0.54129542</d>
<d>0.552951382</d>
<d>0.428172585</d>
<d>0.371247347</d>
<d>0.487569907</d>
<d>0.45487973</d>
<d>0.466222288</d>
<d>0.29230867</d>
<d>0.356642183</d>
<d>0.432173986</d>
<d>0.5111857</d>
<d>0.626530345</d>
<d>0.42252022</d>
<d>0.574959586</d>
<d>0.507802507</d>
<d>0.474292644</d>
<d>0.469775987</d>
<d>0.561406373</d>
<d>0.777768786</d>
</Subcolumn>
</YColumn>
<YColumn Width="84" Decimals="9" Subcolumns="1">
<Title></Title>
<Subcolumn>
<d>0.707769032</d>
<d>0.569149508</d>
<d>0.541157821</d>
<d>0.636902588</d>
<d>0.589214596</d>
<d>0.637323842</d>
<d>0.581735913</d>
<d>0.56404072</d>
<d>0.5931908</d>
<d>0.563487865</d>
<d>0.623715954</d>
<d>0.536892393</d>
<d>0.636191684</d>
<d>0.614177953</d>
<d>0.526358931</d>
<d>0.627107119</d>
<d>0.682800201</d>
<d>0.707473266</d>
<d>0.765563118</d>
<d>0.86762775</d>
</Subcolumn>
</YColumn>
<YColumn Width="84" Decimals="9" Subcolumns="1">
<Title></Title>
<Subcolumn>
<d>0.490480561</d>
<d>0.423410656</d>
<d>0.210035155</d>
<d>0.084144144</d>
<d>0.077940798</d>
<d>0.087157237</d>
<d>0.254221261</d>
<d>0.387956036</d>
<d>0.239409489</d>
<d>0.32696278</d>
<d>0.321486667</d>
<d>0.35038046</d>
<d>0.369041338</d>
<d>0.369448108</d>
<d>0.48553049</d>
<d>0.622291068</d>
<d>0.522365045</d>
<d>0.588603604</d>
<d>0.684177658</d>
<d>0.876671712</d>
</Subcolumn>
</YColumn>
<YColumn Width="84" Decimals="9" Subcolumns="1">
<Title></Title>
<Subcolumn>
<d>0.576123613</d>
<d>0.496439394</d>
<d>0.482138875</d>
<d>0.407520125</d>
<d>0.498333386</d>
<d>0.347093515</d>
<d>0.368559285</d>
<d>0.437394548</d>
<d>0.440378586</d>
<d>0.425520551</d>
<d>0.510889521</d>
<d>0.476124261</d>
<d>0.534897376</d>
<d>0.443086521</d>
<d>0.371444313</d>
<d>0.39670494</d>
<d>0.399082113</d>
<d>0.445211953</d>
<d>0.71828921</d>
<d>0.89779712</d>
</Subcolumn>
</YColumn>
</Table>
<Table ID="Table19" XFormat="numbers" YFormat="replicates" Replicates="1" TableType="XY" EVFormat="AsteriskAfterNumber">
<Title>60-cells</Title>
<RowTitlesColumn Width="84">
<Subcolumn></Subcolumn>
</RowTitlesColumn>
<XColumn Width="51" Subcolumns="1" Decimals="2">
<Title></Title>
<Subcolumn>
<d>0.05</d>
<d>0.1</d>
<d>0.15</d>
<d>0.2</d>
<d>0.25</d>
<d>0.3</d>
<d>0.35</d>
<d>0.4</d>
<d>0.45</d>
<d>0.5</d>
<d>0.55</d>
<d>0.6</d>
<d>0.65</d>
<d>0.7</d>
<d>0.75</d>
<d>0.8</d>
<d>0.85</d>
<d>0.9</d>
<d>0.95</d>
<d>1</d>
</Subcolumn>
</XColumn>
<XAdvancedColumn Version="1" Width="51" Decimals="2" Subcolumns="1">
<Title></Title>
<Subcolumn>
<d>0.05</d>
<d>0.1</d>
<d>0.15</d>
<d>0.2</d>
<d>0.25</d>
<d>0.3</d>
<d>0.35</d>
<d>0.4</d>
<d>0.45</d>
<d>0.5</d>
<d>0.55</d>
<d>0.6</d>
<d>0.65</d>
<d>0.7</d>
<d>0.75</d>
<d>0.8</d>
<d>0.85</d>
<d>0.9</d>
<d>0.95</d>
<d>1</d>
</Subcolumn>
</XAdvancedColumn>
<YColumn Width="84" Decimals="9" Subcolumns="1">
<Title></Title>
<Subcolumn>
<d>0.483318145</d>
<d>0.461166672</d>
<d>0.55274975</d>
<d>0.475696247</d>
<d>0.476802667</d>
<d>0.487363163</d>
<d>0.508080904</d>
<d>0.466076352</d>
<d>0.447776476</d>
<d>0.482596713</d>
<d>0.5039859</d>
<d>0.501086233</d>
<d>0.509340647</d>
<d>0.552472287</d>
<d>0.480572213</d>
<d>0.566300616</d>
<d>0.592059729</d>
<d>0.669319219</d>
<d>0.823584628</d>
<d>0.928687971</d>
</Subcolumn>
</YColumn>
<YColumn Width="84" Decimals="9" Subcolumns="1">
<Title></Title>
<Subcolumn>
<d>0.430413904</d>
<d>0.455596307</d>
<d>0.510773473</d>
<d>0.444877352</d>
<d>0.408886753</d>
<d>0.432807045</d>
<d>0.451937133</d>
<d>0.473721908</d>
<d>0.445157494</d>
<d>0.437686162</d>
<d>0.512571352</d>
<d>0.482890074</d>
<d>0.516598965</d>
<d>0.559699721</d>
<d>0.594484179</d>
<d>0.658749461</d>
<d>0.621341479</d>
<d>0.671524572</d>
<d>0.830116764</d>
</Subcolumn>
</YColumn>
<YColumn Width="84" Decimals="9" Subcolumns="1">
<Title></Title>
<Subcolumn>
<d>0.35238979</d>
<d>0.280642565</d>
<d>0.284837237</d>
<d>0.323790036</d>
<d>0.308519809</d>
<d>0.318328793</d>
<d>0.272886901</d>
<d>0.306972484</d>
<d>0.263328139</d>
<d>0.37615643</d>
<d>0.291904892</d>
<d>0.311495101</d>
<d>0.300852972</d>
<d>0.316347248</d>
<d>0.375693263</d>
<d>0.382177201</d>
<d>0.430118131</d>
<d>0.600437788</d>
<d>0.804464721</d>
</Subcolumn>
</YColumn>
<YColumn Width="84" Decimals="9" Subcolumns="1">
<Title></Title>
<Subcolumn>
<d>0.658837333</d>
<d>0.560801549</d>
<d>0.45647895</d>
<d>0.46584341</d>
<d>0.42798146</d>
<d>0.412820612</d>
<d>0.394687205</d>
<d>0.422261772</d>
<d>0.459795649</d>
<d>0.429724126</d>
<d>0.462291663</d>
<d>0.447244407</d>
<d>0.489533722</d>
<d>0.489592854</d>
<d>0.50937588</d>
<d>0.551645591</d>
<d>0.563859891</d>
<d>0.619926613</d>
<d>0.756087653</d>
<d>0.796940619</d>
</Subcolumn>
</YColumn>
<YColumn Width="84" Decimals="9" Subcolumns="1">
<Title></Title>
<Subcolumn>
<d>0.631466667</d>
<d>0.522747984</d>
<d>0.435285282</d>
<d>0.407659879</d>
<d>0.343698387</d>
<d>0.385132258</d>
<d>0.346720161</d>
<d>0.276397984</d>
<d>0.357262298</d>
<d>0.351597133</d>
<d>0.357692742</d>
<d>0.347785685</d>
<d>0.356589718</d>
<d>0.345486694</d>
<d>0.396227419</d>
<d>0.413385685</d>
<d>0.523960887</d>
<d>0.723889718</d>
<d>0.68443004</d>
<d>0.842914337</d>
</Subcolumn>
</YColumn>
<YColumn Width="84" Decimals="9" Subcolumns="1">
<Title></Title>
<Subcolumn>
<d>0.629415976</d>
<d>0.498599382</d>
<d>0.43897052</d>
<d>0.407271568</d>
<d>0.3646327</d>
<d>0.395999347</d>
<d>0.403650392</d>
<d>0.370468038</d>
<d>0.380623369</d>
<d>0.377540858</d>
<d>0.375225404</d>
<d>0.406900814</d>
<d>0.417019167</d>
<d>0.40447012</d>
<d>0.423882619</d>
<d>0.448955934</d>
<d>0.490988536</d>
<d>0.519296599</d>
<d>0.671544518</d>
<d>0.833572279</d>
</Subcolumn>
</YColumn>
<YColumn Width="84" Decimals="9" Subcolumns="1">
<Title></Title>
<Subcolumn>
<d>0.410410897</d>
<d>0.366294551</d>
<d>0.407301923</d>
<d>0.394701282</d>
<d>0.348324679</d>
<d>0.314960577</d>
<d>0.407110577</d>
<d>0.376330128</d>
<d>0.450886538</d>
<d>0.32730609</d>
<d>0.386115751</d>
<d>0.452363141</d>
<d>0.402045513</d>
<d>0.502188782</d>
<d>0.417305769</d>
<d>0.4466875</d>
<d>0.505964103</d>
<d>0.536044551</d>
<d>0.617422756</d>
<d>0.844700641</d>
</Subcolumn>
</YColumn>
<YColumn Width="84" Decimals="9" Subcolumns="1">
<Title></Title>
<Subcolumn>
<d>0.396914488</d>
<d>0.433206013</d>
<d>0.394219555</d>
<d>0.441282632</d>
<d>0.407295752</d>
<d>0.416659551</d>
<d>0.452626256</d>
<d>0.445320396</d>
<d>0.471994145</d>
<d>0.508943179</d>
<d>0.399401591</d>
<d>0.452695878</d>
<d>0.526646481</d>
<d>0.485574609</d>
<d>0.505859775</d>
<d>0.508573199</d>
<d>0.583839599</d>
<d>0.657655501</d>
<d>0.785949409</d>
<d>0.92023943</d>
</Subcolumn>
</YColumn>
<YColumn Width="84" Decimals="9" Subcolumns="1">
<Title></Title>
<Subcolumn>
<d>0.571586245</d>
<d>0.594216222</d>
<d>0.478943513</d>
<d>0.395766982</d>
<d>0.340288494</d>
<d>0.352647891</d>
<d>0.385015691</d>
<d>0.385797813</d>
<d>0.379533572</d>
<d>0.350894402</d>
<d>0.351731796</d>
<d>0.326679411</d>
<d>0.385628774</d>
<d>0.356021506</d>
<d>0.3662358</d>
<d>0.416252036</d>
<d>0.504677378</d>
<d>0.671849095</d>
<d>0.7332774</d>
<d>0.831636326</d>
</Subcolumn>
</YColumn>
<YColumn Width="84" Decimals="9" Subcolumns="1">
<Title></Title>
<Subcolumn>
<d>0.382583166</d>
<d>0.325094819</d>
<d>0.258037691</d>
<d>0.387080879</d>
<d>0.360208751</d>
<d>0.403210405</d>
<d>0.493486163</d>
<d>0.423832973</d>
<d>0.471220629</d>
<d>0.438367758</d>
<d>0.390089112</d>
<d>0.429487597</d>
<d>0.362382113</d>
<d>0.524252053</d>
<d>0.56727384</d>
<d>0.54316626</d>
<d>0.486639101</d>
<d>0.587063444</d>
<d>0.666308442</d>
<d>0.924436857</d>
</Subcolumn>
</YColumn>
<YColumn Width="84" Decimals="9" Subcolumns="1">
<Title></Title>
<Subcolumn>
<d>0.432804671</d>
<d>0.363602705</d>
<d>0.387094275</d>
<d>0.270702507</d>
<d>0.430847109</d>
<d>0.259820312</d>
<d>0.31144871</d>
<d>0.298563367</d>
<d>0.396165696</d>
<d>0.423688755</d>
<d>0.325197452</d>
<d>0.280684658</d>
<d>0.313700343</d>
<d>0.39908759</d>
<d>0.385993459</d>
<d>0.278940301</d>
<d>0.32519478</d>
<d>0.504504412</d>
<d>0.666946069</d>
<d>0.807478238</d>
</Subcolumn>
</YColumn>
<YColumn Width="84" Decimals="9" Subcolumns="1">
<Title></Title>
<Subcolumn>
<d>0.506074249</d>
<d>0.438602247</d>
<d>0.315103828</d>
<d>0.316439206</d>
<d>0.31385184</d>
<d>0.317454685</d>
<d>0.288228922</d>
<d>0.3531457</d>
<d>0.262985138</d>
<d>0.387117028</d>
<d>0.384291715</d>
<d>0.386266027</d>
<d>0.38034151</d>
<d>0.276120521</d>
<d>0.381036229</d>
<d>0.448772712</d>
<d>0.453741128</d>
<d>0.769774889</d>
<d>0.806230497</d>
<d>0.889014899</d>
</Subcolumn>
</YColumn>
<YColumn Width="84" Decimals="9" Subcolumns="1">
<Title></Title>
<Subcolumn>
<d>0.504163531</d>
<d>0.423449695</d>
<d>0.419575004</d>
<d>0.328675857</d>
<d>0.430892473</d>
<d>0.387326965</d>
<d>0.469192219</d>
<d>0.446121219</d>
<d>0.42954101</d>
<d>0.470925393</d>
<d>0.375474855</d>
<d>0.416721357</d>
<d>0.243474967</d>
<d>0.383799913</d>
<d>0.437201564</d>
<d>0.539631711</d>
<d>0.561064854</d>
<d>0.632733689</d>
<d>0.861527392</d>
<d>0.827344707</d>
</Subcolumn>
</YColumn>
</Table>
<Table ID="Table21" XFormat="numbers" YFormat="replicates" Replicates="1" TableType="XY" EVFormat="AsteriskAfterNumber">
<Title>3hpf</Title>
<RowTitlesColumn Width="84">
<Subcolumn></Subcolumn>
</RowTitlesColumn>
<XColumn Width="51" Subcolumns="1" Decimals="2">
<Title></Title>
<Subcolumn>
<d>0.05</d>
<d>0.1</d>
<d>0.15</d>
<d>0.2</d>
<d>0.25</d>
<d>0.3</d>
<d>0.35</d>
<d>0.4</d>
<d>0.45</d>
<d>0.5</d>
<d>0.55</d>
<d>0.6</d>
<d>0.65</d>
<d>0.7</d>
<d>0.75</d>
<d>0.8</d>
<d>0.85</d>
<d>0.9</d>
<d>0.95</d>
<d>1</d>
</Subcolumn>
</XColumn>
<XAdvancedColumn Version="1" Width="51" Decimals="2" Subcolumns="1">
<Title></Title>
<Subcolumn>
<d>0.05</d>
<d>0.1</d>
<d>0.15</d>
<d>0.2</d>
<d>0.25</d>
<d>0.3</d>
<d>0.35</d>
<d>0.4</d>
<d>0.45</d>
<d>0.5</d>
<d>0.55</d>
<d>0.6</d>
<d>0.65</d>
<d>0.7</d>
<d>0.75</d>
<d>0.8</d>
<d>0.85</d>
<d>0.9</d>
<d>0.95</d>
<d>1</d>
</Subcolumn>
</XAdvancedColumn>
<YColumn Width="84" Decimals="9" Subcolumns="1">
<Title></Title>
<Subcolumn>
<d>0.284577672</d>
<d>0.443520483</d>
<d>0.473659836</d>
<d>0.386127647</d>
<d>0.245046767</d>
<d>0.256644907</d>
<d>0.2976558</d>
<d>0.291620171</d>
<d>0.321923956</d>
<d>0.325708456</d>
<d>0.385417555</d>
<d>0.394362361</d>
<d>0.441484554</d>
<d>0.425377037</d>
<d>0.47024411</d>
<d>0.52994909</d>
<d>0.606582407</d>
<d>0.678836584</d>
<d>0.79796439</d>
<d>0.91014245</d>
</Subcolumn>
</YColumn>
<YColumn Width="84" Decimals="9" Subcolumns="1">
<Title></Title>
<Subcolumn>
<d>0.452709341</d>
<d>0.436884577</d>
<d>0.47905976</d>
<d>0.56618557</d>
<d>0.600352897</d>
<d>0.617654058</d>
<d>0.580157979</d>
<d>0.568717201</d>
<d>0.5867218</d>
<d>0.522520858</d>
<d>0.517530338</d>
<d>0.462237375</d>
<d>0.503210466</d>
<d>0.522055006</d>
<d>0.54454506</d>
<d>0.573724097</d>
<d>0.693666441</d>
<d>0.811666638</d>
<d>0.842087966</d>
<d>0.597942562</d>
</Subcolumn>
</YColumn>
<YColumn Width="84" Decimals="9" Subcolumns="1">
<Title></Title>
<Subcolumn>
<d>0.653425351</d>
<d>0.585838458</d>
<d>0.690793629</d>
<d>0.662022647</d>
<d>0.654268277</d>
<d>0.651819945</d>
<d>0.666450542</d>
<d>0.549831259</d>
<d>0.583765063</d>
<d>0.75427662</d>
<d>0.594507753</d>
<d>0.47291331</d>
<d>0.570934813</d>
<d>0.573246426</d>
<d>0.566398921</d>
<d>0.760281589</d>
<d>0.589921306</d>
<d>0.636577753</d>
<d>0.740992547</d>
<d>0.921029711</d>
</Subcolumn>
</YColumn>
<YColumn Width="84" Decimals="9" Subcolumns="1">
<Title></Title>
<Subcolumn>
<d>0.549701494</d>
<d>0.426258116</d>
<d>0.515084894</d>
<d>0.538169502</d>
<d>0.590224438</d>
<d>0.581119076</d>
<d>0.477156426</d>
<d>0.476439035</d>
<d>0.604818908</d>
<d>0.565719536</d>
<d>0.646205725</d>
<d>0.594264168</d>
<d>0.726757911</d>
<d>0.787858981</d>
<d>0.72567405</d>
<d>0.806343632</d>
<d>0.828949239</d>
<d>0.87618</d>
<d>0.91736555</d>
<d>0.943887037</d>
</Subcolumn>
</YColumn>
<YColumn Width="84" Decimals="9" Subcolumns="1">
<Title></Title>
<Subcolumn>
<d>0.611041009</d>
<d>0.549684543</d>
<d>0.525236593</d>
<d>0.54455836</d>
<d>0.606861199</d>
<d>0.619479495</d>
<d>0.692429022</d>
<d>0.704652997</d>
<d>0.695977918</d>
<d>0.759069401</d>
<d>0.599369085</d>
<d>0.677050473</d>
<d>0.689274448</d>
<d>0.725157729</d>
<d>0.610410095</d>
<d>0.588722397</d>
<d>0.597003155</d>
<d>0.606861199</d>
<d>0.769321767</d>
<d>0.893533123</d>
</Subcolumn>
</YColumn>
<YColumn Width="84" Decimals="9" Subcolumns="1">
<Title></Title>
<Subcolumn>
<d>0.626097971</d>
<d>0.586614815</d>
<d>0.540774936</d>
<d>0.654366493</d>
<d>0.716227215</d>
<d>0.598190621</d>
<d>0.685374211</d>
<d>0.549095179</d>
<d>0.525219287</d>
<d>0.573858365</d>
<d>0.576227162</d>
<d>0.580826648</d>
<d>0.607958367</d>
<d>0.573797877</d>
<d>0.581705112</d>
<d>0.566304703</d>
<d>0.587700178</d>
<d>0.63855255</d>
<d>0.814676658</d>
<d>0.904909219</d>
</Subcolumn>
</YColumn>
<YColumn Width="84" Decimals="9" Subcolumns="1">
<Title></Title>
<Subcolumn>
<d>0.62819431</d>
<d>0.619341213</d>
<d>0.592408676</d>
<d>0.568793297</d>
<d>0.566185337</d>
<d>0.465024756</d>
<d>0.456054363</d>
<d>0.461188244</d>
<d>0.385673</d>
<d>0.492048823</d>
<d>0.484560049</d>
<d>0.458828096</d>
<d>0.481018979</d>
<d>0.553344871</d>
<d>0.593433826</d>
<d>0.541126477</d>
<d>0.591694733</d>
<d>0.684284608</d>
<d>0.876756</d>
<d>0.818842877</d>
</Subcolumn>
</YColumn>
<YColumn Width="84" Decimals="9" Subcolumns="1">
<Title></Title>
<Subcolumn>
<d>0.376641354</d>
<d>0.376363256</d>
<d>0.371969952</d>
<d>0.396244687</d>
<d>0.419393287</d>
<d>0.359614195</d>
<d>0.397621439</d>
<d>0.352163116</d>
<d>0.38634356</d>
<d>0.367527573</d>
<d>0.387719493</d>
<d>0.383935144</d>
<d>0.36732636</d>
<d>0.424027718</d>
<d>0.584519887</d>
<d>0.531769001</d>
<d>0.610830795</d>
<d>0.694597035</d>
<d>0.726231895</d>
<d>0.89160175</d>
</Subcolumn>
</YColumn>
<YColumn Width="84" Decimals="9" Subcolumns="1">
<Title></Title>
<Subcolumn>
<d>0.727776563</d>
<d>0.677932813</d>
<d>0.681601563</d>
<d>0.623715</d>
<d>0.679034375</d>
<d>0.71814125</d>
<d>0.614324063</d>
<d>0.538748438</d>
<d>0.508830469</d>
<d>0.5225975</d>
<d>0.529441875</d>
<d>0.489884063</d>
<d>0.503031641</d>
<d>0.475299688</d>
<d>0.519458438</d>
<d>0.504365938</d>
<d>0.604995313</d>
<d>0.779016875</d>
<d>0.880195625</d>
<d>0.913972813</d>
</Subcolumn>
</YColumn>
<YColumn Width="84" Decimals="9" Subcolumns="1">
<Title></Title>
<Subcolumn>
<d>0.692479405</d>
<d>0.625438711</d>
<d>0.585451073</d>
<d>0.534442155</d>
<d>0.385725248</d>
<d>0.404802119</d>
<d>0.396157357</d>
<d>0.412754144</d>
<d>0.37218725</d>
<d>0.387857567</d>
<d>0.377202232</d>
<d>0.416694073</d>
<d>0.374660999</d>
<d>0.436319626</d>
<d>0.546681441</d>
<d>0.545236746</d>
<d>0.566797832</d>
<d>0.655740965</d>
<d>0.753308753</d>
<d>0.905307832</d>
</Subcolumn>
</YColumn>
</Table>
<Table ID="Table23" XFormat="numbers" YFormat="replicates" Replicates="1" TableType="XY" EVFormat="AsteriskAfterNumber">
<Title>4hpf</Title>
<RowTitlesColumn Width="84">
<Subcolumn></Subcolumn>
</RowTitlesColumn>
<XColumn Width="51" Subcolumns="1" Decimals="2">
<Title></Title>
<Subcolumn>
<d>0.05</d>
<d>0.1</d>
<d>0.15</d>
<d>0.2</d>
<d>0.25</d>
<d>0.3</d>
<d>0.35</d>
<d>0.4</d>
<d>0.45</d>
<d>0.5</d>
<d>0.55</d>
<d>0.6</d>
<d>0.65</d>
<d>0.7</d>
<d>0.75</d>
<d>0.8</d>
<d>0.85</d>
<d>0.9</d>
<d>0.95</d>
<d>1</d>
</Subcolumn>
</XColumn>
<XAdvancedColumn Version="1" Width="51" Decimals="2" Subcolumns="1">
<Title></Title>
<Subcolumn>
<d>0.05</d>
<d>0.1</d>
<d>0.15</d>
<d>0.2</d>
<d>0.25</d>
<d>0.3</d>
<d>0.35</d>
<d>0.4</d>
<d>0.45</d>
<d>0.5</d>
<d>0.55</d>
<d>0.6</d>
<d>0.65</d>
<d>0.7</d>
<d>0.75</d>
<d>0.8</d>
<d>0.85</d>
<d>0.9</d>
<d>0.95</d>
<d>1</d>
</Subcolumn>
</XAdvancedColumn>
<YColumn Width="84" Decimals="9" Subcolumns="1">
<Title></Title>
<Subcolumn>
<d>0.503776035</d>
<d>0.594874242</d>
<d>0.574237174</d>
<d>0.545326745</d>
<d>0.407246404</d>
<d>0.501583021</d>
<d>0.539199586</d>
<d>0.438047716</d>
<d>0.410143274</d>
<d>0.491312016</d>
<d>0.586773322</d>
<d>0.557790764</d>
<d>0.559272279</d>
<d>0.59238268</d>
<d>0.575688356</d>
<d>0.639801172</d>
<d>0.701933301</d>
<d>0.8122162</d>
<d>0.861873085</d>
<d>0.67268396</d>
</Subcolumn>
</YColumn>
<YColumn Width="84" Decimals="9" Subcolumns="1">
<Title></Title>
<Subcolumn>
<d>0.427181909</d>
<d>0.460588649</d>
<d>0.544088574</d>
<d>0.505634979</d>
<d>0.476034329</d>
<d>0.412588574</d>
<d>0.430713416</d>
<d>0.456842243</d>
<d>0.509234941</d>
<d>0.49120439</d>
<d>0.477846571</d>
<d>0.534244371</d>
<d>0.536288022</d>
<d>0.738574273</d>
<d>0.686997031</d>
<d>0.713793144</d>
<d>0.807279226</d>
<d>0.705831297</d>
<d>0.876090212</d>
<d>0.76530414</d>
</Subcolumn>
</YColumn>
<YColumn Width="84" Decimals="9" Subcolumns="1">
<Title></Title>
<Subcolumn>
<d>0.680506262</d>
<d>0.732897341</d>
<d>0.704088657</d>
<d>0.699447458</d>
<d>0.684269681</d>
<d>0.622051652</d>
<d>0.653286011</d>
<d>0.529352211</d>
<d>0.533701304</d>
<d>0.626065761</d>
<d>0.715336474</d>
<d>0.672018812</d>
<d>0.689286987</d>
<d>0.665202773</d>
<d>0.649271463</d>
<d>0.856998853</d>
<d>0.84596031</d>
<d>0.788759881</d>
<d>0.829235369</d>
<d>0.906296483</d>
</Subcolumn>
</YColumn>
<YColumn Width="84" Decimals="9" Subcolumns="1">
<Title></Title>
<Subcolumn>
<d>0.634212081</d>
<d>0.658531832</d>
<d>0.670583776</d>
<d>0.684492773</d>
<d>0.66976289</d>
<d>0.625162797</d>
<d>0.600692009</d>
<d>0.598617925</d>
<d>0.598704621</d>
<d>0.568294314</d>
<d>0.506155675</d>
<d>0.617279626</d>
<d>0.600540584</d>
<d>0.604838622</d>
<d>0.574838564</d>
<d>0.624276695</d>
<d>0.561879427</d>
<d>0.703154474</d>
<d>0.69265751</d>
<d>0.819352544</d>
</Subcolumn>
</YColumn>
<YColumn Width="84" Decimals="9" Subcolumns="1">
<Title></Title>
<Subcolumn>
<d>0.640167699</d>
<d>0.665533952</d>
<d>0.710669932</d>
<d>0.556694852</d>
<d>0.614278564</d>
<d>0.571391643</d>
<d>0.556067236</d>
<d>0.52803354</d>
<d>0.58760491</d>
<d>0.544142544</d>
<d>0.623692795</d>
<d>0.663389468</d>
<d>0.612971163</d>
<d>0.63326393</d>
<d>0.766736541</d>
<d>0.754812006</d>
<d>0.784257994</d>
<d>0.752720164</d>
<d>0.782165681</d>
<d>0.86589993</d>
</Subcolumn>
</YColumn>
<YColumn Width="84" Decimals="9" Subcolumns="1">
<Title></Title>
<Subcolumn>
<d>0.417195526</d>
<d>0.429086447</d>
<d>0.34131735</d>
<d>0.336008868</d>
<d>0.428179186</d>
<d>0.417022519</d>
<d>0.392947878</d>
<d>0.358331466</d>
<d>0.496505664</d>
<d>0.522681538</d>
<d>0.541267365</d>
<d>0.525158679</d>
<d>0.53575162</d>
<d>0.5555946</d>
<d>0.590594514</d>
<d>0.606378839</d>
<d>0.655484074</d>
<d>0.653905469</d>
<d>0.914030129</d>
<d>0.743621376</d>
</Subcolumn>
</YColumn>
</Table>
<Table ID="Table25" XFormat="numbers" YFormat="replicates" Replicates="1" TableType="XY" EVFormat="AsteriskAfterNumber">
<Title>5hpf</Title>
<RowTitlesColumn Width="84">
<Subcolumn></Subcolumn>
</RowTitlesColumn>
<XColumn Width="51" Subcolumns="1" Decimals="2">
<Title></Title>
<Subcolumn>
<d>0.05</d>
<d>0.1</d>
<d>0.15</d>
<d>0.2</d>
<d>0.25</d>
<d>0.3</d>
<d>0.35</d>
<d>0.4</d>
<d>0.45</d>
<d>0.5</d>
<d>0.55</d>
<d>0.6</d>
<d>0.65</d>
<d>0.7</d>
<d>0.75</d>
<d>0.8</d>
<d>0.85</d>
<d>0.9</d>
<d>0.95</d>
<d>1</d>
</Subcolumn>
</XColumn>
<XAdvancedColumn Version="1" Width="51" Decimals="2" Subcolumns="1">
<Title></Title>
<Subcolumn>
<d>0.05</d>
<d>0.1</d>
<d>0.15</d>
<d>0.2</d>
<d>0.25</d>
<d>0.3</d>
<d>0.35</d>
<d>0.4</d>
<d>0.45</d>
<d>0.5</d>
<d>0.55</d>
<d>0.6</d>
<d>0.65</d>
<d>0.7</d>
<d>0.75</d>
<d>0.8</d>
<d>0.85</d>
<d>0.9</d>
<d>0.95</d>
<d>1</d>
</Subcolumn>
</XAdvancedColumn>
<YColumn Width="84" Decimals="9" Subcolumns="1">
<Title></Title>
<Subcolumn>
<d>0.460426927</d>
<d>0.545629633</d>
<d>0.479139328</d>
<d>0.44617203</d>
<d>0.391009754</d>
<d>0.376039462</d>
<d>0.261316085</d>
<d>0.393761397</d>
<d>0.471471303</d>
<d>0.515043814</d>
<d>0.578102916</d>
<d>0.607054889</d>
<d>0.656632355</d>
<d>0.616663489</d>
<d>0.691780279</d>
<d>0.727946733</d>
<d>0.712380955</d>
<d>0.848786044</d>
<d>0.890888453</d>
<d>0.928066131</d>
</Subcolumn>
</YColumn>
<YColumn Width="84" Decimals="9" Subcolumns="1">
<Title></Title>
<Subcolumn>
<d>0.600890208</d>
<d>0.677547478</d>
<d>0.684471068</d>
<d>0.685459941</d>
<d>0.807121662</d>
<d>0.681503709</d>
<d>0.608308605</d>
<d>0.566765579</d>
<d>0.558852374</d>
<d>0.531652077</d>
<d>0.56379822</d>
<d>0.59347181</d>
<d>0.595449555</d>
<d>0.519287834</d>
<d>0.643422107</d>
<d>0.697824184</d>
<d>0.771513353</d>
<d>0.838278932</d>
<d>0.940652819</d>
<d>0.959940653</d>
</Subcolumn>
</YColumn>
<YColumn Width="84" Decimals="9" Subcolumns="1">
<Title></Title>
<Subcolumn>
<d>0.518536033</d>
<d>0.535479501</d>
<d>0.509956817</d>
<d>0.493296126</d>
<d>0.494871022</d>
<d>0.543946039</d>
<d>0.522485398</d>
<d>0.490809412</d>
<d>0.52801728</d>
<d>0.577738833</d>
<d>0.503488259</d>
<d>0.51451357</d>
<d>0.5032972</d>
<d>0.504711177</d>
<d>0.507776785</d>
<d>0.63607615</d>
<d>0.644876565</d>
<d>0.736170467</d>
<d>0.87557976</d>
<d>0.932604606</d>
</Subcolumn>
</YColumn>
<YColumn Width="84" Decimals="9" Subcolumns="1">
<Title></Title>
<Subcolumn>
<d>0.441575004</d>
<d>0.459920738</d>
<d>0.47826093</d>
<d>0.452643143</d>
<d>0.518587732</d>
<d>0.47486439</d>
<d>0.521181627</d>
<d>0.547216543</d>
<d>0.565448295</d>
<d>0.531625891</d>
<d>0.618762587</d>
<d>0.527578885</d>
<d>0.571563193</d>
<d>0.586567733</d>
<d>0.627835503</d>
<d>0.630768055</d>
<d>0.719986502</d>
<d>0.830935964</d>
<d>0.806565842</d>
<d>0.926438552</d>
</Subcolumn>
</YColumn>
<YColumn Width="84" Decimals="9" Subcolumns="1">
<Title></Title>
<Subcolumn>
<d>0.39443651</d>
<d>0.379223981</d>
<d>0.4116141</d>
<d>0.449056602</d>
<d>0.414743783</d>
<d>0.448121017</d>
<d>0.458758675</d>
<d>0.590892654</d>
<d>0.61535835</d>
<d>0.646812884</d>
<d>0.597563149</d>
<d>0.568737865</d>
<d>0.664093531</d>
<d>0.609988359</d>
<d>0.551672502</d>
<d>0.55614945</d>
<d>0.598452157</d>
<d>0.677856287</d>
<d>0.894389566</d>
<d>0.931420572</d>
</Subcolumn>
</YColumn>
<YColumn Width="84" Decimals="9" Subcolumns="1">
<Title></Title>
<Subcolumn>
<d>0.41778524</d>
<d>0.410807243</d>
<d>0.472625318</d>
<d>0.403471042</d>
<d>0.471551404</d>
<d>0.398819509</d>
<d>0.421364022</d>
<d>0.460010495</d>
<d>0.54535698</d>
<d>0.545625633</d>
<d>0.55448234</d>
<d>0.499016102</d>
<d>0.598497219</d>
<d>0.634997725</d>
<d>0.689032543</d>
<d>0.680892011</d>
<d>0.693505904</d>
<d>0.641439114</d>
<d>0.773483984</d>
<d>0.880479937</d>
</Subcolumn>
</YColumn>
<YColumn Width="84" Decimals="9" Subcolumns="1">
<Title></Title>
<Subcolumn>
<d>0.548455167</d>
<d>0.584750316</d>
<d>0.583658282</d>
<d>0.491782266</d>
<d>0.421808465</d>
<d>0.45651308</d>
<d>0.446278018</d>
<d>0.489912891</d>
<d>0.494464678</d>
<d>0.537824311</d>
<d>0.491111545</d>
<d>0.551991166</d>
<d>0.57322501</d>
<d>0.592189771</d>
<d>0.554846425</d>
<d>0.681165438</d>
<d>0.786700102</d>
<d>0.775329794</d>
<d>0.918000671</d>
<d>0.96025684</d>
</Subcolumn>
</YColumn>
<YColumn Width="84" Decimals="9" Subcolumns="1">
<Title></Title>
<Subcolumn>
<d>0.329054085</d>
<d>0.317205771</d>
<d>0.396583093</d>
<d>0.403480914</d>
<d>0.302465687</d>
<d>0.395778879</d>
<d>0.389198388</d>
<d>0.290252565</d>
<d>0.30806465</d>
<d>0.331828831</d>
<d>0.439908158</d>
<d>0.506736308</d>
<d>0.464680063</d>
<d>0.413628904</d>
<d>0.515248679</d>
<d>0.54572703</d>
<d>0.541445575</d>
<d>0.647394141</d>
<d>0.857840725</d>
<d>0.895961674</d>
</Subcolumn>
</YColumn>
<YColumn Width="84" Decimals="9" Subcolumns="1">
<Title></Title>
<Subcolumn>
<d>0.36627556</d>
<d>0.389763973</d>
<d>0.389494735</d>
<d>0.433756611</d>
<d>0.454420395</d>
<d>0.378354194</d>
<d>0.470232715</d>
<d>0.553865473</d>
<d>0.619160563</d>
<d>0.51668084</d>
<d>0.52934855</d>
<d>0.558547028</d>
<d>0.516091908</d>
<d>0.44289073</d>
<d>0.57316136</d>
<d>0.709970756</d>
<d>0.731313026</d>
<d>0.894326361</d>
<d>0.976012641</d>
<d>0.928386364</d>
</Subcolumn>
</YColumn>
<YColumn Width="84" Decimals="9" Subcolumns="1">
<Title></Title>
<Subcolumn>
<d>0.54368932</d>
<d>0.611650485</d>
<d>0.640776699</d>
<d>0.601941748</d>
<d>0.626213592</d>
<d>0.631067961</d>
<d>0.631067961</d>
<d>0.674757282</d>
<d>0.796116505</d>
<d>0.674757282</d>
<d>0.59223301</d>
<d>0.640776699</d>
<d>0.766990291</d>
<d>0.844660194</d>
<d>0.834951456</d>
<d>0.805825243</d>
<d>0.922330097</d>
<d>1</d>
<d>0.970873786</d>
<d>0.922330097</d>
</Subcolumn>
</YColumn>
<YColumn Width="84" Decimals="9" Subcolumns="1">
<Title></Title>
<Subcolumn>
<d>0.428085693</d>
<d>0.504859477</d>
<d>0.503887319</d>
<d>0.471817266</d>
<d>0.490443729</d>
<d>0.486880463</d>
<d>0.413994217</d>
<d>0.438127825</d>
<d>0.552316342</d>
<d>0.571428884</d>
<d>0.622691945</d>
<d>0.680920169</d>
<d>0.678328623</d>
<d>0.611273356</d>
<d>0.668772352</d>
<d>0.693392039</d>
<d>0.678571335</d>
<d>0.802397464</d>
<d>0.910430732</d>
<d>0.923874759</d>
</Subcolumn>
</YColumn>
<YColumn Width="84" Decimals="9" Subcolumns="1">
<Title></Title>
<Subcolumn>
<d>0.315627774</d>
<d>0.419509944</d>
<d>0.299989412</d>
<d>0.359117627</d>
<d>0.385751171</d>
<d>0.505986832</d>
<d>0.500420281</d>
<d>0.546977805</d>
<d>0.608456119</d>
<d>0.471099708</d>
<d>0.595658182</d>
<d>0.5915618</d>
<d>0.64281762</d>
<d>0.631835471</d>
<d>0.720044526</d>
<d>0.727032376</d>
<d>0.820907622</d>
<d>0.885056404</d>
<d>0.849163103</d>
<d>0.918014254</d>
</Subcolumn>
</YColumn>
<YColumn Width="84" Decimals="9" Subcolumns="1">
<Title></Title>
<Subcolumn>
<d>0.369960939</d>
<d>0.462189875</d>
<d>0.421749868</d>
<d>0.545477433</d>
<d>0.503932288</d>
<d>0.642058261</d>
<d>0.447904814</d>
<d>0.456360105</d>
<d>0.581612412</d>
<d>0.600345274</d>
<d>0.572030185</d>
<d>0.594724762</d>
<d>0.545567893</d>
<d>0.569764324</d>
<d>0.575961383</d>
<d>0.519314858</d>
<d>0.578263755</d>
<d>0.602558821</d>
<d>0.690706155</d>
<d>0.890816887</d>
</Subcolumn>
</YColumn>
<YColumn Width="84" Decimals="9" Subcolumns="1">
<Title></Title>
<Subcolumn>
<d>0.368077169</d>
<d>0.417010153</d>
<d>0.500045295</d>
<d>0.444164407</d>
<d>0.464644144</d>
<d>0.478894224</d>
<d>0.457877419</d>
<d>0.427855031</d>
<d>0.451246579</d>
<d>0.529351054</d>
<d>0.488886588</d>
<d>0.430139185</d>
<d>0.471635726</d>
<d>0.58617181</d>
<d>0.688025339</d>
<d>0.718811269</d>
<d>0.604677986</d>
<d>0.696809302</d>
<d>0.742964741</d>
<d>0.855888005</d>
</Subcolumn>
</YColumn>
<YColumn Width="84" Decimals="9" Subcolumns="1">
<Title></Title>
<Subcolumn>
<d>0.25599085</d>
<d>0.224673529</d>
<d>0.241285621</d>
<d>0.364379412</d>
<d>0.455882353</d>
<d>0.408497059</d>
<d>0.445261765</d>
<d>0.523964706</d>
<d>0.487745098</d>
<d>0.43872549</d>
<d>0.615468627</d>
<d>0.513889216</d>
<d>0.627995425</d>
<d>0.670751961</d>
<d>0.636437255</d>
<d>0.724400654</d>
<d>0.489379412</d>
<d>0.75</d>
<d>0.804738235</d>
<d>0.938452941</d>
</Subcolumn>
</YColumn>
<YColumn Width="84" Decimals="9" Subcolumns="1">
<Title></Title>
<Subcolumn>
<d>0.329219315</d>
<d>0.409501634</d>
<d>0.425701523</d>
<d>0.435701957</d>
<d>0.501003571</d>
<d>0.481604086</d>
<d>0.392295731</d>
<d>0.466451732</d>
<d>0.475473019</d>
<d>0.391719043</d>
<d>0.390085865</d>
<d>0.42527491</d>
<d>0.531125368</d>
<d>0.603838294</d>
<d>0.776408745</d>
<d>0.704131523</d>
<d>0.622516039</d>
<d>0.854400734</d>
<d>0.933738236</d>
<d>0.759209219</d>
</Subcolumn>
</YColumn>
<YColumn Width="84" Decimals="9" Subcolumns="1">
<Title></Title>
<Subcolumn>
<d>0.36535745</d>
<d>0.350696171</d>
<d>0.398582405</d>
<d>0.414768517</d>
<d>0.411810044</d>
<d>0.447712883</d>
<d>0.464279545</d>
<d>0.489059611</d>
<d>0.403131913</d>
<d>0.362788296</d>
<d>0.482422774</d>
<d>0.429065029</d>
<d>0.467180147</d>
<d>0.613044992</d>
<d>0.647987247</d>
<d>0.656514122</d>
<d>0.46900486</d>
<d>0.523719522</d>
<d>0.55089425</d>
<d>0.883027183</d>
</Subcolumn>
</YColumn>
<YColumn Width="84" Decimals="9" Subcolumns="1">
<Title></Title>
<Subcolumn>
<d>0.301559602</d>
<d>0.276552515</d>
<d>0.205107631</d>
<d>0.326061163</d>
<d>0.447488211</d>
<d>0.371708588</d>
<d>0.437222596</d>
<d>0.41761516</d>
<d>0.414380725</d>
<d>0.449603105</d>
<d>0.415015055</d>
<d>0.357672696</d>
<d>0.33413017</d>
<d>0.427328622</d>
<d>0.475999039</d>
<d>0.69112437</d>
<d>0.699772306</d>
<d>0.701305193</d>
<d>0.817717927</d>
<d>0.920083691</d>
</Subcolumn>
</YColumn>
<YColumn Width="84" Decimals="9" Subcolumns="1">
<Title></Title>
<Subcolumn>
<d>0.461397123</d>
<d>0.444897164</d>
<d>0.448265533</d>
<d>0.380765214</d>
<d>0.375898016</d>
<d>0.406555355</d>
<d>0.377680945</d>
<d>0.492052531</d>
<d>0.480743866</d>
<d>0.48163864</d>
<d>0.447077281</d>
<d>0.553268051</d>
<d>0.472071116</d>
<d>0.561232759</d>
<d>0.574224092</d>
<d>0.66686195</d>
<d>0.729665254</d>
<d>0.66349303</d>
<d>0.863843107</d>
<d>0.757632615</d>
</Subcolumn>
</YColumn>
<YColumn Width="84" Decimals="9" Subcolumns="1">
<Title></Title>
<Subcolumn>
<d>0.379561792</d>
<d>0.3261863</d>
<d>0.401459598</d>
<d>0.454379616</d>
<d>0.439172548</d>
<d>0.555200537</d>
<d>0.452554571</d>
<d>0.459853931</d>
<d>0.436587785</d>
<d>0.427006674</d>
<d>0.5</d>
<d>0.515967196</d>
<d>0.474452103</d>
<d>0.562499897</d>
<d>0.599452445</d>
<d>0.564476722</d>
<d>0.614051576</d>
<d>0.754257892</d>
<d>0.872719001</d>
<d>0.977645761</d>
</Subcolumn>
</YColumn>
</Table>
<Table ID="Table27" XFormat="numbers" YFormat="replicates" Replicates="1" TableType="XY" EVFormat="AsteriskAfterNumber">
<Title>6hpf</Title>
<RowTitlesColumn Width="84">
<Subcolumn></Subcolumn>
</RowTitlesColumn>
<XColumn Width="51" Subcolumns="1" Decimals="2">
<Title></Title>
<Subcolumn>
<d>0.05</d>
<d>0.1</d>
<d>0.15</d>
<d>0.2</d>
<d>0.25</d>
<d>0.3</d>
<d>0.35</d>
<d>0.4</d>
<d>0.45</d>
<d>0.5</d>
<d>0.55</d>
<d>0.6</d>
<d>0.65</d>
<d>0.7</d>
<d>0.75</d>
<d>0.8</d>
<d>0.85</d>
<d>0.9</d>
<d>0.95</d>
<d>1</d>
</Subcolumn>
</XColumn>
<XAdvancedColumn Version="1" Width="51" Decimals="2" Subcolumns="1">
<Title></Title>
<Subcolumn>
<d>0.05</d>
<d>0.1</d>
<d>0.15</d>
<d>0.2</d>
<d>0.25</d>
<d>0.3</d>
<d>0.35</d>
<d>0.4</d>
<d>0.45</d>
<d>0.5</d>
<d>0.55</d>
<d>0.6</d>
<d>0.65</d>
<d>0.7</d>
<d>0.75</d>
<d>0.8</d>
<d>0.85</d>
<d>0.9</d>
<d>0.95</d>
<d>1</d>
</Subcolumn>
</XAdvancedColumn>
<YColumn Width="84" Decimals="9" Subcolumns="1">
<Title></Title>
<Subcolumn>
<d>0.493528575</d>
<d>0.512397103</d>
<d>0.525870587</d>
<d>0.49947484</d>
<d>0.549885157</d>
<d>0.687475527</d>
<d>0.497620355</d>
<d>0.546325764</d>
<d>0.530531327</d>
<d>0.57888568</d>
<d>0.638745152</d>
<d>0.589940975</d>
<d>0.620199867</d>
<d>0.667060646</d>
<d>0.707546798</d>
<d>0.793337521</d>
<d>0.714134292</d>
<d>0.789973694</d>
<d>0.947950475</d>
<d>0.899184622</d>
</Subcolumn>
</YColumn>
<YColumn Width="84" Decimals="9" Subcolumns="1">
<Title></Title>
<Subcolumn>
<d>0.408659001</d>
<d>0.40700812</d>
<d>0.397295567</d>
<d>0.460577036</d>
<d>0.476207888</d>
<d>0.532281367</d>
<d>0.499167127</d>
<d>0.581633897</d>
<d>0.63868641</d>
<d>0.52093032</d>
<d>0.556328642</d>
<d>0.591394014</d>
<d>0.591399464</d>
<d>0.567859047</d>
<d>0.598801674</d>
<d>0.778236411</d>
<d>0.857623881</d>
<d>0.982917442</d>
<d>0.928749512</d>
<d>0.784711116</d>
</Subcolumn>
</YColumn>
<YColumn Width="84" Decimals="9" Subcolumns="1">
<Title></Title>
<Subcolumn>
<d>0.542646615</d>
<d>0.629519451</d>
<d>0.514303648</d>
<d>0.54645862</d>
<d>0.557556126</d>
<d>0.644166452</d>
<d>0.592934196</d>
<d>0.569713364</d>
<d>0.50619852</d>
<d>0.57384026</d>
<d>0.593599102</d>
<d>0.662454083</d>
<d>0.708402519</d>
<d>0.611136141</d>
<d>0.773154523</d>
<d>0.681290353</d>
<d>0.769623499</d>
<d>0.818022033</d>
<d>0.845409426</d>
<d>0.880673044</d>
</Subcolumn>
</YColumn>
<YColumn Width="84" Decimals="9" Subcolumns="1">
<Title></Title>
<Subcolumn>
<d>0.59815513</d>
<d>0.57062842</d>
<d>0.613088048</d>
<d>0.635795399</d>
<d>0.612136868</d>
<d>0.639973421</d>
<d>0.638815431</d>
<d>0.62932305</d>
<d>0.697344313</d>
<d>0.766938681</d>
<d>0.773577524</d>
<d>0.769647377</d>
<d>0.880005824</d>
<d>0.892890047</d>
<d>0.915950545</d>
<d>0.957623246</d>
<d>0.93878258</d>
<d>0.941202338</d>
<d>0.961511584</d>
<d>0.821352257</d>
</Subcolumn>
</YColumn>
<YColumn Width="84" Decimals="9" Subcolumns="1">
<Title></Title>
<Subcolumn>
<d>0.48884818</d>
<d>0.45046043</d>
<d>0.484878401</d>
<d>0.523434216</d>
<d>0.644110521</d>
<d>0.463992597</d>
<d>0.403675623</d>
<d>0.372180482</d>
<d>0.464160935</d>
<d>0.564578086</d>
<d>0.605178932</d>
<d>0.588221639</d>
<d>0.594152279</d>
<d>0.705095415</d>
<d>0.686550047</d>
<d>0.689724296</d>
<d>0.761905538</d>
<d>0.725480549</d>
<d>0.748871867</d>
<d>0.887719395</d>
</Subcolumn>
</YColumn>
<YColumn Width="84" Decimals="9" Subcolumns="1">
<Title></Title>
<Subcolumn>
<d>0.509897001</d>
<d>0.43781908</d>
<d>0.445325667</d>
<d>0.45308467</d>
<d>0.529393632</d>
<d>0.532421508</d>
<d>0.644662907</d>
<d>0.562663414</d>
<d>0.543224024</d>
<d>0.601764456</d>
<d>0.559516031</d>
<d>0.483318758</d>
<d>0.508715615</d>
<d>0.659716289</d>
<d>0.691268302</d>
<d>0.720752959</d>
<d>0.658854053</d>
<d>0.669895582</d>
<d>0.856300406</d>
<d>0.920287051</d>
</Subcolumn>
</YColumn>
<YColumn Width="84" Decimals="9" Subcolumns="1">
<Title></Title>
<Subcolumn>
<d>0.411186228</d>
<d>0.459227483</d>
<d>0.491076687</d>
<d>0.530584376</d>
<d>0.514805567</d>
<d>0.640490039</d>
<d>0.638540498</d>
<d>0.550561577</d>
<d>0.588347266</d>
<d>0.583541724</d>
<d>0.599371384</d>
<d>0.620862999</d>
<d>0.625205736</d>
<d>0.665581425</d>
<d>0.664375011</d>
<d>0.673282071</d>
<d>0.708195184</d>
<d>0.762899797</d>
<d>0.772137868</d>
<d>0.854269293</d>
</Subcolumn>
</YColumn>
<YColumn Width="84" Decimals="9" Subcolumns="1">
<Title></Title>
<Subcolumn>
<d>0.769220312</d>
<d>0.759544051</d>
<d>0.675874587</d>
<d>0.675884792</d>
<d>0.686209442</d>
<d>0.625565427</d>
<d>0.645480141</d>
<d>0.579659405</d>
<d>0.642999754</d>
<d>0.657289634</d>
<d>0.57912145</d>
<d>0.57546292</d>
<d>0.640736954</d>
<d>0.630950259</d>
<d>0.658863953</d>
<d>0.78417079</d>
<d>0.768249005</d>
<d>0.783334336</d>
<d>0.966050351</d>
<d>0.918714521</d>
</Subcolumn>
</YColumn>
<YColumn Width="84" Decimals="9" Subcolumns="1">
<Title></Title>
<Subcolumn>
<d>0.445358702</d>
<d>0.541583408</d>
<d>0.501174033</d>
<d>0.560607335</d>
<d>0.445114813</d>
<d>0.460070274</d>
<d>0.474513287</d>
<d>0.565251884</d>
<d>0.529154865</d>
<d>0.430931668</d>
<d>0.592896037</d>
<d>0.534878695</d>
<d>0.58620506</d>
<d>0.675027304</d>
<d>0.68551903</d>
<d>0.834470923</d>
<d>0.907167879</d>
<d>0.954557534</d>
<d>0.909493518</d>
<d>0.87859975</d>
</Subcolumn>
</YColumn>
<YColumn Width="84" Decimals="9" Subcolumns="1">
<Title></Title>
<Subcolumn>
<d>0.318241469</d>
<d>0.167435287</d>
<d>0.197641508</d>
<d>0.272797798</d>
<d>0.436971305</d>
<d>0.363734623</d>
<d>0.389495361</d>
<d>0.438092235</d>
<d>0.370973434</d>
<d>0.383627143</d>
<d>0.38844661</d>
<d>0.364567653</d>
<d>0.426067491</d>
<d>0.481339031</d>
<d>0.55705231</d>
<d>0.613387527</d>
<d>0.736321362</d>
<d>0.736642387</d>
<d>0.908558531</d>
<d>0.922723717</d>
</Subcolumn>
</YColumn>
<YColumn Width="84" Decimals="9" Subcolumns="1">
<Title></Title>
<Subcolumn>
<d>0.558666526</d>
<d>0.558284452</d>
<d>0.496978888</d>
<d>0.466123697</d>
<d>0.428132823</d>
<d>0.406894977</d>
<d>0.417170034</d>
<d>0.40225369</d>
<d>0.501477352</d>
<d>0.504934211</d>
<d>0.682825054</d>
<d>0.628763427</d>
<d>0.727030086</d>
<d>0.834974128</d>
<d>0.67329777</d>
<d>0.71514577</d>
<d>0.723740612</d>
<d>0.929759366</d>
<d>0.950166657</d>
<d>0.882928942</d>
</Subcolumn>
</YColumn>
<YColumn Width="84" Decimals="9" Subcolumns="1">
<Title></Title>
<Subcolumn>
<d>0.313255015</d>
<d>0.374709537</d>
<d>0.31221487</d>
<d>0.316767544</d>
<d>0.328951298</d>
<d>0.260326799</d>
<d>0.399936512</d>
<d>0.363320008</d>
<d>0.376409654</d>
<d>0.42099475</d>
<d>0.404530592</d>
<d>0.483698953</d>
<d>0.420692995</d>
<d>0.493224626</d>
<d>0.527885055</d>
<d>0.456280019</d>
<d>0.688174087</d>
<d>0.925829105</d>
<d>0.9802937</d>
<d>0.788831675</d>
</Subcolumn>
</YColumn>
<YColumn Width="84" Decimals="9" Subcolumns="1">
<Title></Title>
<Subcolumn>
<d>0.358087487</d>
<d>0.455408613</d>
<d>0.432349949</d>
<d>0.395727365</d>
<d>0.410647677</d>
<d>0.461851475</d>
<d>0.418107833</d>
<d>0.468463886</d>
<d>0.390640895</d>
<d>0.417429637</d>
<d>0.454730417</d>
<d>0.525940997</d>
<d>0.519837233</d>
<d>0.687182096</d>
<d>0.744659207</d>
<d>0.683960665</d>
<d>0.684638861</d>
<d>0.808748728</d>
<d>0.939640556</d>
<d>0.901831129</d>
</Subcolumn>
</YColumn>
<YColumn Width="84" Decimals="9" Subcolumns="1">
<Title></Title>
<Subcolumn>
<d>0.388835174</d>
<d>0.415989434</d>
<d>0.365540556</d>
<d>0.38931749</d>
<d>0.388559406</d>
<d>0.43983503</d>
<d>0.411371708</d>
<d>0.423431832</d>
<d>0.464093721</d>
<d>0.419848517</d>
<d>0.457340185</d>
<d>0.573190842</d>
<d>0.499241916</d>
<d>0.51040663</d>
<d>0.592005618</d>
<d>0.642453379</d>
<d>0.650103441</d>
<d>0.696209803</d>
<d>0.816471638</d>
<d>0.874017924</d>
</Subcolumn>
</YColumn>
<YColumn Width="84" Decimals="9" Subcolumns="1">
<Title></Title>
<Subcolumn>
<d>0.325211007</d>
<d>0.272417929</d>
<d>0.295808593</d>
<d>0.361111282</d>
<d>0.461989148</d>
<d>0.40009845</d>
<d>0.290449085</d>
<d>0.418129607</d>
<d>0.423001979</d>
<d>0.646524251</d>
<d>0.529240377</d>
<d>0.623782419</d>
<d>0.53849901</d>
<d>0.393762626</d>
<d>0.407895679</d>
<d>0.63547775</d>
<d>0.867934241</d>
<d>0.766570263</d>
<d>0.980507439</d>
<d>0.804094662</d>
</Subcolumn>
</YColumn>
<YColumn Width="84" Decimals="9" Subcolumns="1">
<Title></Title>
<Subcolumn>
<d>0.589658516</d>
<d>0.492403245</d>
<d>0.3762294</d>
<d>0.423794506</d>
<d>0.394166019</d>
<d>0.445338892</d>
<d>0.428833874</d>
<d>0.49356869</d>
<d>0.500349103</d>
<d>0.560058515</d>
<d>0.551739537</d>
<d>0.558843638</d>
<d>0.453096513</d>
<d>0.457971942</d>
<d>0.556398802</d>
<d>0.454403275</d>
<d>0.55073831</d>
<d>0.712401358</d>
<d>0.92854761</d>
<d>0.831586144</d>
</Subcolumn>
</YColumn>
</Table>
<Table ID="Table29" XFormat="numbers" YFormat="replicates" Replicates="1" TableType="XY" EVFormat="AsteriskAfterNumber">
<Title>7hpf</Title>
<RowTitlesColumn Width="84">
<Subcolumn></Subcolumn>
</RowTitlesColumn>
<XColumn Width="51" Subcolumns="1" Decimals="2">
<Title></Title>
<Subcolumn>
<d>0.05</d>
<d>0.1</d>
<d>0.15</d>
<d>0.2</d>
<d>0.25</d>
<d>0.3</d>
<d>0.35</d>
<d>0.4</d>
<d>0.45</d>
<d>0.5</d>
<d>0.55</d>
<d>0.6</d>
<d>0.65</d>
<d>0.7</d>
<d>0.75</d>
<d>0.8</d>
<d>0.85</d>
<d>0.9</d>
<d>0.95</d>
<d>1</d>
</Subcolumn>
</XColumn>
<XAdvancedColumn Version="1" Width="51" Decimals="2" Subcolumns="1">
<Title></Title>
<Subcolumn>
<d>0.05</d>
<d>0.1</d>
<d>0.15</d>
<d>0.2</d>
<d>0.25</d>
<d>0.3</d>
<d>0.35</d>
<d>0.4</d>
<d>0.45</d>
<d>0.5</d>
<d>0.55</d>
<d>0.6</d>
<d>0.65</d>
<d>0.7</d>
<d>0.75</d>
<d>0.8</d>
<d>0.85</d>
<d>0.9</d>
<d>0.95</d>
<d>1</d>
</Subcolumn>
</XAdvancedColumn>
<YColumn Width="84" Decimals="9" Subcolumns="1">
<Title></Title>
<Subcolumn>
<d>0.378314156</d>
<d>0.394253803</d>
<d>0.451631452</d>
<d>0.558565249</d>
<d>0.58875305</d>
<d>0.549586626</d>
<d>0.492905892</d>
<d>0.405066146</d>
<d>0.349342401</d>
<d>0.378966371</d>
<d>0.41700615</d>
<d>0.377059506</d>
<d>0.435581071</d>
<d>0.344578793</d>
<d>0.603624974</d>
<d>0.561259445</d>
<d>0.750267693</d>
<d>0.968091245</d>
<d>0.946585421</d>
<d>0.776693575</d>
</Subcolumn>
</YColumn>
<YColumn Width="84" Decimals="9" Subcolumns="1">
<Title></Title>
<Subcolumn>
<d>0.033729621</d>
<d>0.105287543</d>
<d>0.149488745</d>
<d>0.289271606</d>
<d>0.382001382</d>
<d>0.216980738</d>
<d>0.164892464</d>
<d>0.213588746</d>
<d>0.200700646</d>
<d>0.231249746</d>
<d>0.386556601</d>
<d>0.396804853</d>
<d>0.305269078</d>
<d>0.296771877</d>
<d>0.23940165</d>
<d>0.364525031</d>
<d>0.354172031</d>
<d>0.561498552</d>
<d>0.78491967</d>
<d>0.848885561</d>
</Subcolumn>
</YColumn>
<YColumn Width="84" Decimals="9" Subcolumns="1">
<Title></Title>
<Subcolumn>
<d>0.407074298</d>
<d>0.273428548</d>
<d>0.25319197</d>
<d>0.310608234</d>
<d>0.304841918</d>
<d>0.371950484</d>
<d>0.513681773</d>
<d>0.40622389</d>
<d>0.461753581</d>
<d>0.505365017</d>
<d>0.49038451</d>
<d>0.440868028</d>
<d>0.518257518</d>
<d>0.601335729</d>
<d>0.650372534</d>
<d>0.733389609</d>
<d>0.796153647</d>
<d>0.964474103</d>
<d>0.939832646</d>
<d>0.771511406</d>
</Subcolumn>
</YColumn>
<YColumn Width="84" Decimals="9" Subcolumns="1">
<Title></Title>
<Subcolumn>
<d>0.247663534</d>
<d>0.355140172</d>
<d>0.443924806</d>
<d>0.602803433</d>
<d>0.533878014</d>
<d>0.474298733</d>
<d>0.346962607</d>
<d>0.675233756</d>
<d>0.636682264</d>
<d>0.464952595</d>
<d>0.551401716</d>
<d>0.613317327</d>
<d>0.686915406</d>
<d>0.677569268</d>
<d>0.77570004</d>
<d>0.63317736</d>
<d>0.735980793</d>
<d>0.933410911</d>
<d>0.834111565</d>
<d>0.670560278</d>
</Subcolumn>
</YColumn>
<YColumn Width="84" Decimals="9" Subcolumns="1">
<Title></Title>
<Subcolumn>
<d>0.367647059</d>
<d>0.323529412</d>
<d>0.382352941</d>
<d>0.352941176</d>
<d>0.411764706</d>
<d>0.352941176</d>
<d>0.441176471</d>
<d>0.411764706</d>
<d>0.558823529</d>
<d>0.411764706</d>
<d>0.676470588</d>
<d>0.764705882</d>
<d>0.485294118</d>
<d>0.558823529</d>
<d>0.470588235</d>
<d>0.617647059</d>
<d>0.705882353</d>
<d>0.838235294</d>
<d>0.882352941</d>
<d>0.911764706</d>
</Subcolumn>
</YColumn>
<YColumn Width="84" Decimals="9" Subcolumns="1">
<Title></Title>
<Subcolumn>
<d>0.497192713</d>
<d>0.480525933</d>
<d>0.410127105</d>
<d>0.526503061</d>
<d>0.393865255</d>
<d>0.34409687</d>
<d>0.504194484</d>
<d>0.422713961</d>
<d>0.490624227</d>
<d>0.546411549</d>
<d>0.54587618</d>
<d>0.387846884</d>
<d>0.419443896</d>
<d>0.514292779</d>
<d>0.558390443</d>
<d>0.679035178</d>
<d>0.718546472</d>
<d>0.974998696</d>
<d>0.948928921</d>
<d>0.751070172</d>
</Subcolumn>
</YColumn>
<YColumn Width="84" Decimals="9" Subcolumns="1">
<Title></Title>
<Subcolumn>
<d>0.280758577</d>
<d>0.297410391</d>
<d>0.351526592</d>
<d>0.349213987</d>
<d>0.261331899</d>
<d>0.416589477</d>
<d>0.369565179</d>
<d>0.315911236</d>
<d>0.403561755</d>
<d>0.368177967</d>
<d>0.288005737</d>
<d>0.440102066</d>
<d>0.481499155</d>
<d>0.522433548</d>
<d>0.608464848</d>
<d>0.637989713</d>
<d>0.815680986</d>
<d>0.83903861</d>
<d>0.912119231</d>
<d>0.828168968</d>
</Subcolumn>
</YColumn>
<YColumn Width="84" Decimals="9" Subcolumns="1">
<Title></Title>
<Subcolumn>
<d>0.350527808</d>
<d>0.330494662</d>
<d>0.362195951</d>
<d>0.529440343</d>
<d>0.433558169</d>
<d>0.499593876</d>
<d>0.429893904</d>
<d>0.420772329</d>
<d>0.424593705</d>
<d>0.524810914</d>
<d>0.376817928</d>
<d>0.368436527</d>
<d>0.467913943</d>
<d>0.423121363</d>
<d>0.531634554</d>
<d>0.721760678</d>
<d>0.767931408</d>
<d>0.906676215</d>
<d>0.870911403</d>
<d>0.854537564</d>
</Subcolumn>
</YColumn>
<YColumn Width="84" Decimals="9" Subcolumns="1">
<Title></Title>
<Subcolumn>
<d>0.303652201</d>
<d>0.370627673</d>
<d>0.555445283</d>
<d>0.50888239</d>
<d>0.416749057</d>
<d>0.510096226</d>
<d>0.502483019</d>
<d>0.455478616</d>
<d>0.413659748</d>
<d>0.427011321</d>
<d>0.456360377</d>
<d>0.619442138</d>
<d>0.522454088</d>
<d>0.363786792</d>
<d>0.41057044</d>
<d>0.400198742</d>
<d>0.496413836</d>
<d>0.576961006</d>
<d>0.782080503</d>
<d>0.911618239</d>
</Subcolumn>
</YColumn>
<YColumn Width="84" Decimals="9" Subcolumns="1">
<Title></Title>
<Subcolumn>
<d>0.394023479</d>
<d>0.352258983</d>
<d>0.362765327</d>
<d>0.474457488</d>
<d>0.470651014</d>
<d>0.427202656</d>
<d>0.430451797</d>
<d>0.574528637</d>
<d>0.564283173</d>
<d>0.50188545</d>
<d>0.614300961</d>
<d>0.397509783</d>
<d>0.429953753</d>
<d>0.396086802</d>
<d>0.529941895</d>
<d>0.645606546</d>
<d>0.746567058</d>
<d>0.768480968</d>
<d>0.74226254</d>
<d>0.898434721</d>
</Subcolumn>
</YColumn>
<YColumn Width="84" Decimals="9" Subcolumns="1">
<Title></Title>
<Subcolumn>
<d>0.399160109</d>
<d>0.485927325</d>
<d>0.44776565</d>
<d>0.482511404</d>
<d>0.411996092</d>
<d>0.512474692</d>
<d>0.540804663</d>
<d>0.341454279</d>
<d>0.337045471</d>
<d>0.464692435</d>
<d>0.649391547</d>
<d>0.570541813</d>
<d>0.6414776</d>
<d>0.60579726</d>
<d>0.494949879</d>
<d>0.699603022</d>
<d>0.812494479</d>
<d>0.94115023</d>
<d>0.966079297</d>
<d>0.864623415</d>
</Subcolumn>
</YColumn>
<YColumn Width="84" Decimals="9" Subcolumns="1">
<Title></Title>
<Subcolumn>
<d>0.277288781</d>
<d>0.409331322</d>
<d>0.268486051</d>
<d>0.266725663</d>
<d>0.527289177</d>
<d>0.278169767</d>
<d>0.410211516</d>
<d>0.425176395</d>
<d>0.5</d>
<d>0.595950633</d>
<d>0.552817175</d>
<d>0.602992976</d>
<d>0.529048773</d>
<d>0.578345172</d>
<d>0.560739711</d>
<d>0.698943609</d>
<d>0.602112782</d>
<d>0.610035319</d>
<d>0.819542046</d>
<d>0.723591413</d>
</Subcolumn>
</YColumn>
<YColumn Width="84" Decimals="9" Subcolumns="1">
<Title></Title>
<Subcolumn>
<d>0.421610714</d>
<d>0.357157738</d>
<d>0.402440179</d>
<d>0.388930357</d>
<d>0.335356548</d>
<d>0.342579464</d>
<d>0.329866667</d>
<d>0.323871429</d>
<d>0.336354464</d>
<d>0.567122619</d>
<d>0.512799405</d>
<d>0.475677679</d>
<d>0.57931131</d>
<d>0.588014286</d>
<d>0.662123214</d>
<d>0.649013095</d>
<d>0.61849881</d>
<d>0.747247321</d>
<d>0.839489286</d>
<d>0.935269643</d>
</Subcolumn>
</YColumn>
<YColumn Width="84" Decimals="9" Subcolumns="1">
<Title></Title>
<Subcolumn>
<d>0.32352237</d>
<d>0.304982862</d>
<d>0.314302621</d>
<d>0.272485309</d>
<d>0.31300781</d>
<d>0.502003206</d>
<d>0.441978234</d>
<d>0.452238985</d>
<d>0.507321856</d>
<d>0.521405669</d>
<d>0.685198851</d>
<d>0.628660549</d>
<d>0.666232033</d>
<d>0.552797064</d>
<d>0.677118595</d>
<d>0.689138591</d>
<d>0.748853687</d>
<d>0.858006461</d>
<d>0.989705914</d>
<d>0.87859918</d>
</Subcolumn>
</YColumn>
<YColumn Width="84" Decimals="9" Subcolumns="1">
<Title></Title>
<Subcolumn>
<d>0.665678584</d>
<d>0.607826725</d>
<d>0.663938197</d>
<d>0.572146204</d>
<d>0.557052284</d>
<d>0.453712287</d>
<d>0.577091231</d>
<d>0.564471554</d>
<d>0.566108175</d>
<d>0.708607737</d>
<d>0.596262579</d>
<d>0.502729046</d>
<d>0.427036927</d>
<d>0.482876302</d>
<d>0.542725656</d>
<d>0.457327956</d>
<d>0.444399863</d>
<d>0.573578751</d>
<d>0.786329635</d>
<d>0.874471946</d>
</Subcolumn>
</YColumn>
<YColumn Width="84" Decimals="9" Subcolumns="1">
<Title></Title>
<Subcolumn>
<d>0.273643547</d>
<d>0.340490188</d>
<d>0.529242097</d>
<d>0.599687151</d>
<d>0.425613005</d>
<d>0.564014687</d>
<d>0.709385256</d>
<d>0.626881037</d>
<d>0.460259202</d>
<d>0.642933997</d>
<d>0.611345532</d>
<d>0.560132161</d>
<d>0.521091385</d>
<d>0.654313666</d>
<d>0.525848938</d>
<d>0.484122046</d>
<d>0.576313134</d>
<d>0.664307335</d>
<d>0.688313316</d>
<d>0.885518416</d>
</Subcolumn>
</YColumn>
<YColumn Width="84" Decimals="9" Subcolumns="1">
<Title></Title>
<Subcolumn>
<d>0.172619048</d>
<d>0.205357143</d>
<d>0.267857143</d>
<d>0.1875</d>
<d>0.223214286</d>
<d>0.294642857</d>
<d>0.267857143</d>
<d>0.392857143</d>
<d>0.3125</d>
<d>0.31547619</d>
<d>0.160714286</d>
<d>0.151785714</d>
<d>0.196428571</d>
<d>0.392857143</d>
<d>0.223214286</d>
<d>0.428571429</d>
<d>0.473214286</d>
<d>0.571428571</d>
<d>0.526785714</d>
<d>0.946428571</d>
</Subcolumn>
</YColumn>
<YColumn Width="84" Decimals="9" Subcolumns="1">
<Title></Title>
<Subcolumn>
<d>0.545957044</d>
<d>0.565698042</d>
<d>0.408559697</d>
<d>0.531111813</d>
<d>0.429722047</d>
<d>0.419140872</d>
<d>0.624447252</d>
<d>0.452463677</d>
<d>0.659665193</d>
<d>0.516582438</d>
<d>0.387239419</d>
<d>0.414297747</d>
<d>0.565382186</d>
<d>0.673089071</d>
<d>0.719677827</d>
<d>0.618919773</d>
<d>0.784586229</d>
<d>0.698673405</d>
<d>0.930827543</d>
<d>0.823120657</d>
</Subcolumn>
</YColumn>
</Table>
<Table ID="Table31" XFormat="numbers" YFormat="replicates" Replicates="1" TableType="XY" EVFormat="AsteriskAfterNumber">
<Title>8hpf</Title>
<RowTitlesColumn Width="84">
<Subcolumn></Subcolumn>
</RowTitlesColumn>
<XColumn Width="51" Subcolumns="1" Decimals="1">
<Title></Title>
<Subcolumn>
<d>0.1</d>
<d>0.2</d>
<d>0.3</d>
<d>0.4</d>
<d>0.5</d>
<d>0.6</d>
<d>0.7</d>
<d>0.8</d>
<d>0.9</d>
<d>1</d>
</Subcolumn>
</XColumn>
<XAdvancedColumn Version="1" Width="51" Decimals="1" Subcolumns="1">
<Title></Title>
<Subcolumn>
<d>0.1</d>
<d>0.2</d>
<d>0.3</d>
<d>0.4</d>
<d>0.5</d>
<d>0.6</d>
<d>0.7</d>
<d>0.8</d>
<d>0.9</d>
<d>1</d>
</Subcolumn>
</XAdvancedColumn>
<YColumn Width="84" Decimals="9" Subcolumns="1">
<Title></Title>
<Subcolumn>
<d>0.345804762</d>
<d>0.33922898</d>
<d>0.392290136</d>
<d>0.370521224</d>
<d>0.39040068</d>
<d>0.384126939</d>
<d>0.497052245</d>
<d>0.40325034</d>
<d>0.482539592</d>
<d>0.688208503</d>
</Subcolumn>
</YColumn>
<YColumn Width="84" Decimals="9" Subcolumns="1">
<Title></Title>
<Subcolumn>
<d>0.488633014</d>
<d>0.499656526</d>
<d>0.481820251</d>
<d>0.406291561</d>
<d>0.507147051</d>
<d>0.2927547</d>
<d>0.182681332</d>
<d>0.454192634</d>
<d>0.456448721</d>
<d>0.837518636</d>
</Subcolumn>
</YColumn>
<YColumn Width="84" Decimals="9" Subcolumns="1">
<Title></Title>
<Subcolumn>
<d>0.35691273</d>
<d>0.355894668</d>
<d>0.484262476</d>
<d>0.443777767</d>
<d>0.393962907</d>
<d>0.523169624</d>
<d>0.524131233</d>
<d>0.597356629</d>
<d>0.764606691</d>
<d>0.895248952</d>
</Subcolumn>
</YColumn>
<YColumn Width="84" Decimals="9" Subcolumns="1">
<Title></Title>
<Subcolumn>
<d>0.377600314</d>
<d>0.4106</d>
<d>0.376250863</d>
<d>0.27896044</d>
<d>0.386577708</d>
<d>0.476991575</d>
<d>0.374427473</d>
<d>0.473410675</d>
<d>0.661286447</d>
<d>0.781372998</d>
</Subcolumn>
</YColumn>
<YColumn Width="84" Decimals="9" Subcolumns="1">
<Title></Title>
<Subcolumn>
<d>0.420206054</d>
<d>0.419292012</d>
<d>0.491085394</d>
<d>0.567972836</d>
<d>0.379381341</d>
<d>0.453096895</d>
<d>0.485475783</d>
<d>0.394625888</d>
<d>0.800738871</d>
<d>0.853099939</d>
</Subcolumn>
</YColumn>
<YColumn Width="84" Decimals="9" Subcolumns="1">
<Title></Title>
<Subcolumn>
<d>0.439550023</d>
<d>0.368489364</d>
<d>0.354500902</d>
<d>0.532917059</d>
<d>0.552194761</d>
<d>0.476605582</d>
<d>0.576547088</d>
<d>0.551355999</d>
<d>0.810268131</d>
<d>0.871204544</d>
</Subcolumn>
</YColumn>
<YColumn Width="84" Decimals="9" Subcolumns="1">
<Title></Title>
<Subcolumn>
<d>0.492400617</d>
<d>0.477203219</d>
<d>0.486322205</d>
<d>0.386017464</d>
<d>0.297872282</d>
<d>0.341944873</d>
<d>0.457445644</d>
<d>0.542552988</d>
<d>0.589664785</d>
<d>0.787233693</d>
</Subcolumn>
</YColumn>
<YColumn Width="84" Decimals="9" Subcolumns="1">
<Title></Title>
<Subcolumn>
<d>0.541478852</d>
<d>0.425857183</d>
<d>0.491622235</d>
<d>0.45635576</d>
<d>0.43034396</d>
<d>0.409387569</d>
<d>0.520047535</d>
<d>0.622462312</d>
<d>0.746025154</d>
<d>0.909766125</d>
</Subcolumn>
</YColumn>
<YColumn Width="84" Decimals="9" Subcolumns="1">
<Title></Title>
<Subcolumn>
<d>0.337349431</d>
<d>0.378202767</d>
<d>0.45118333</d>
<d>0.393296553</d>
<d>0.31532991</d>
<d>0.420578849</d>
<d>0.409223222</d>
<d>0.517241895</d>
<d>0.911923782</d>
<d>0.761320573</d>
</Subcolumn>
</YColumn>
<YColumn Width="84" Decimals="9" Subcolumns="1">
<Title></Title>
<Subcolumn>
<d>0.488062451</d>
<d>0.434097919</d>
<d>0.367717327</d>
<d>0.441260105</d>
<d>0.504298572</d>
<d>0.391117927</d>
<d>0.580229891</d>
<d>0.421203921</d>
<d>0.457020008</d>
<d>0.77268398</d>
</Subcolumn>
</YColumn>
</Table>
<Table ID="Table33" XFormat="numbers" YFormat="replicates" Replicates="1" TableType="XY" EVFormat="AsteriskAfterNumber">
<Title>9hpf</Title>
<RowTitlesColumn Width="84">
<Subcolumn></Subcolumn>
</RowTitlesColumn>
<XColumn Width="51" Subcolumns="1" Decimals="1">
<Title></Title>
<Subcolumn>
<d>0.1</d>
<d>0.2</d>
<d>0.3</d>
<d>0.4</d>
<d>0.5</d>
<d>0.6</d>
<d>0.7</d>
<d>0.8</d>
<d>0.9</d>
<d>1</d>
</Subcolumn>
</XColumn>
<XAdvancedColumn Version="1" Width="51" Decimals="1" Subcolumns="1">
<Title></Title>
<Subcolumn>
<d>0.1</d>
<d>0.2</d>
<d>0.3</d>
<d>0.4</d>
<d>0.5</d>
<d>0.6</d>
<d>0.7</d>
<d>0.8</d>
<d>0.9</d>
<d>1</d>
</Subcolumn>
</XAdvancedColumn>
<YColumn Width="84" Decimals="9" Subcolumns="1">
<Title></Title>
<Subcolumn>
<d>0.301906083</d>
<d>0.258781816</d>
<d>0.28611306</d>
<d>0.286061409</d>
<d>0.180714664</d>
<d>0.272235381</d>
<d>0.417444897</d>
<d>0.462541988</d>
<d>0.420087128</d>
<d>0.754164154</d>
</Subcolumn>
</YColumn>
<YColumn Width="84" Decimals="9" Subcolumns="1">
<Title></Title>
<Subcolumn>
<d>0.33556517</d>
<d>0.340707549</d>
<d>0.364226306</d>
<d>0.423114554</d>
<d>0.30356462</d>
<d>0.247117085</d>
<d>0.292302386</d>
<d>0.464337254</d>
<d>0.599970608</d>
<d>0.78096204</d>
</Subcolumn>
</YColumn>
<YColumn Width="84" Decimals="9" Subcolumns="1">
<Title></Title>
<Subcolumn>
<d>0.493084801</d>
<d>0.579173518</d>
<d>0.534067765</d>
<d>0.510256026</d>
<d>0.448370504</d>
<d>0.638069162</d>
<d>0.517522491</d>
<d>0.625332437</d>
<d>0.828177631</d>
<d>0.936885996</d>
</Subcolumn>
</YColumn>
<YColumn Width="84" Decimals="9" Subcolumns="1">
<Title></Title>
<Subcolumn>
<d>0.395920868</d>
<d>0.328837535</d>
<d>0.37219888</d>
<d>0.480742297</d>
<d>0.398207283</d>
<d>0.473792017</d>
<d>0.433473389</d>
<d>0.573123249</d>
<d>0.547811625</d>
<d>0.917909664</d>
</Subcolumn>
</YColumn>
<YColumn Width="84" Decimals="9" Subcolumns="1">
<Title></Title>
<Subcolumn>
<d>0.143245493</d>
<d>0.234134705</d>
<d>0.319485134</d>
<d>0.411928634</d>
<d>0.338074472</d>
<d>0.632878602</d>
<d>0.790409631</d>
<d>0.770999043</d>
<d>0.982761191</d>
<d>0.652510343</d>
</Subcolumn>
</YColumn>
<YColumn Width="84" Decimals="9" Subcolumns="1">
<Title></Title>
<Subcolumn>
<d>0.443686122</d>
<d>0.486369428</d>
<d>0.548281288</d>
<d>0.483689179</d>
<d>0.552767267</d>
<d>0.570965358</d>
<d>0.596300628</d>
<d>0.734020691</d>
<d>0.70038413</d>
<d>0.807386003</d>
</Subcolumn>
</YColumn>
<YColumn Width="84" Decimals="9" Subcolumns="1">
<Title></Title>
<Subcolumn>
<d>0.537932896</d>
<d>0.581654454</d>
<d>0.517140378</d>
<d>0.477622445</d>
<d>0.47278442</d>
<d>0.588002314</d>
<d>0.400969919</d>
<d>0.510950636</d>
<d>0.832090243</d>
<d>0.666640956</d>
</Subcolumn>
</YColumn>
<YColumn Width="84" Decimals="9" Subcolumns="1">
<Title></Title>
<Subcolumn>
<d>0.414754092</d>
<d>0.348420742</d>
<d>0.332300174</d>
<d>0.380227295</d>
<d>0.39106317</d>
<d>0.309550166</d>
<d>0.376639936</d>
<d>0.477426285</d>
<d>0.665194824</d>
<d>0.848486339</d>
</Subcolumn>
</YColumn>
<YColumn Width="84" Decimals="9" Subcolumns="1">
<Title></Title>
<Subcolumn>
<d>0.506002981</d>
<d>0.478989568</d>
<d>0.347959476</d>
<d>0.404160457</d>
<d>0.331195908</d>
<d>0.549160772</d>
<d>0.665907549</d>
<d>0.759677882</d>
<d>0.921961253</d>
<d>0.832332837</d>
</Subcolumn>
</YColumn>
<YColumn Width="84" Decimals="9" Subcolumns="1">
<Title></Title>
<Subcolumn>
<d>0.299837255</d>
<d>0.398692157</d>
<d>0.339870588</d>
<d>0.413670588</d>
<d>0.339870588</d>
<d>0.487745098</d>
<d>0.520968627</d>
<d>0.725490196</d>
<d>0.887798039</d>
<d>0.815903922</d>
</Subcolumn>
</YColumn>
<YColumn Width="84" Decimals="9" Subcolumns="1">
<Title></Title>
<Subcolumn>
<d>0.269379236</d>
<d>0.337345134</d>
<d>0.464292807</d>
<d>0.508908292</d>
<d>0.48387155</d>
<d>0.491895152</d>
<d>0.385492159</d>
<d>0.551599123</d>
<d>0.820736424</d>
<d>0.839031462</d>
</Subcolumn>
</YColumn>
</Table>
<Table ID="Table35" XFormat="numbers" YFormat="replicates" Replicates="1" TableType="XY" EVFormat="AsteriskAfterNumber">
<Title>10hpf</Title>
<RowTitlesColumn Width="32">
<Subcolumn></Subcolumn>
</RowTitlesColumn>
<XColumn Width="51" Subcolumns="1" Decimals="2">
<Title></Title>
<Subcolumn>
<d>0.05</d>
<d>0.1</d>
<d>0.15</d>
<d>0.2</d>
<d>0.25</d>
<d>0.3</d>
<d>0.35</d>
<d>0.4</d>
<d>0.45</d>
<d>0.5</d>
<d>0.55</d>
<d>0.6</d>
<d>0.65</d>
<d>0.7</d>
<d>0.75</d>
<d>0.8</d>
<d>0.85</d>
<d>0.9</d>
<d>0.95</d>
<d>1</d>
</Subcolumn>
</XColumn>
<XAdvancedColumn Version="1" Width="51" Decimals="2" Subcolumns="1">
<Title></Title>
<Subcolumn>
<d>0.05</d>
<d>0.1</d>
<d>0.15</d>
<d>0.2</d>
<d>0.25</d>
<d>0.3</d>
<d>0.35</d>
<d>0.4</d>
<d>0.45</d>
<d>0.5</d>
<d>0.55</d>
<d>0.6</d>
<d>0.65</d>
<d>0.7</d>
<d>0.75</d>
<d>0.8</d>
<d>0.85</d>
<d>0.9</d>
<d>0.95</d>
<d>1</d>
</Subcolumn>
</XAdvancedColumn>
<YColumn Width="84" Decimals="9" Subcolumns="1">
<Title></Title>
<Subcolumn>
<d>0.736908281</d>
<d>0.84750739</d>
<d>0.833263515</d>
<d>0.519689715</d>
<d>0.653330734</d>
<d>0.489107714</d>
<d>0.575408483</d>
<d>0.670088074</d>
<d>0.607038065</d>
<d>0.552367179</d>
<d>0.68475086</d>
<d>0.692920226</d>
<d>0.596564689</d>
<d>0.769794594</d>
<d>0.779220693</d>
<d>0.732928326</d>
<d>0.698366066</d>
<d>0.940511035</d>
<d>0.815668353</d>
<d>0.58671968</d>
</Subcolumn>
</YColumn>
<YColumn Width="84" Decimals="9" Subcolumns="1">
<Title></Title>
<Subcolumn>
<d>0.584743731</d>
<d>0.476827988</d>
<d>0.51022344</d>
<d>0.576068281</d>
<d>0.620618326</d>
<d>0.633076785</d>
<d>0.589359125</d>
<d>0.755971749</d>
<d>0.661018244</d>
<d>0.730943019</d>
<d>0.776520502</d>
<d>0.707144854</d>
<d>0.811662101</d>
<d>0.838704087</d>
<d>0.823883267</d>
<d>0.887303628</d>
<d>0.675816701</d>
<d>0.803525838</d>
<d>0.756841406</d>
<d>0.530807601</d>
</Subcolumn>
</YColumn>
<YColumn Width="84" Decimals="9" Subcolumns="1">
<Title></Title>
<Subcolumn>
<d>0.487536455</d>
<d>0.543107448</d>
<d>0.692455234</d>
<d>0.737536455</d>
<d>0.818996425</d>
<d>0.589938672</d>
<d>0.77753857</d>
<d>0.880098164</d>
<d>0.695163435</d>
<d>0.713216743</d>
<d>0.681255215</d>
<d>0.54473368</d>
<d>0.650997789</d>
<d>0.783770957</d>
<d>0.755319271</d>
<d>0.778938982</d>
<d>0.7591119</d>
<d>0.573499301</d>
<d>0.598112456</d>
<d>0.481913905</d>
</Subcolumn>
</YColumn>
<YColumn Width="84" Decimals="9" Subcolumns="1">
<Title></Title>
<Subcolumn>
<d>0.384776608</d>
<d>0.635217553</d>
<d>0.558527235</d>
<d>0.659492682</d>
<d>0.930352564</d>
<d>0.631879657</d>
<d>0.639253794</d>
<d>0.49012266</d>
<d>0.551848822</d>
<d>0.495754868</d>
<d>0.653317706</d>
<d>0.751419851</d>
<d>0.785273403</d>
<d>0.570691894</d>
<d>0.483092889</d>
<d>0.870684727</d>
<d>0.627975394</d>
<d>0.537849588</d>
<d>0.693946688</d>
<d>0.375837096</d>
</Subcolumn>
</YColumn>
<YColumn Width="84" Decimals="9" Subcolumns="1">
<Title></Title>
<Subcolumn>
<d>0.853702174</d>
<d>0.632197826</d>
<d>0.550528261</d>
<d>0.527613043</d>
<d>0.722678261</d>
<d>0.760869565</d>
<d>0.687426087</d>
<d>0.697415217</d>
<d>0.777319565</d>
<d>0.81786087</d>
<d>0.642186957</d>
<d>0.703878261</d>
<d>0.792008696</d>
<d>0.6416</d>
<d>0.816686957</d>
<d>0.84195</d>
<d>0.683315217</d>
<d>0.608108696</d>
<d>0.884254348</d>
<d>0.779082609</d>
</Subcolumn>
</YColumn>
<YColumn Width="84" Decimals="9" Subcolumns="1">
<Title></Title>
<Subcolumn>
<d>0.767342409</d>
<d>0.855395847</d>
<d>0.690643287</d>
<d>0.787829398</d>
<d>0.712161223</d>
<d>0.856222415</d>
<d>0.869881486</d>
<d>0.613348494</d>
<d>0.714308166</d>
<d>0.900604856</d>
<d>0.924236427</d>
<d>0.875266791</d>
<d>0.885294589</d>
<d>0.804017005</d>
<d>0.753037218</d>
<d>0.826097628</d>
<d>0.883042547</d>
<d>0.70053106</d>
<d>0.884241653</d>
<d>0.811022461</d>
</Subcolumn>
</YColumn>
</Table>
<Table ID="Table37" XFormat="numbers" YFormat="replicates" Replicates="1" TableType="XY" EVFormat="AsteriskAfterNumber">
<Title>11hpf</Title>
<RowTitlesColumn Width="32">
<Subcolumn></Subcolumn>
</RowTitlesColumn>
<XColumn Width="51" Subcolumns="1" Decimals="1">
<Title></Title>
<Subcolumn>
<d>0.1</d>
<d>0.2</d>
<d>0.3</d>
<d>0.4</d>
<d>0.5</d>
<d>0.6</d>
<d>0.7</d>
<d>0.8</d>
<d>0.9</d>
<d>1</d>
</Subcolumn>
</XColumn>
<XAdvancedColumn Version="1" Width="51" Decimals="1" Subcolumns="1">
<Title></Title>
<Subcolumn>
<d>0.1</d>
<d>0.2</d>
<d>0.3</d>
<d>0.4</d>
<d>0.5</d>
<d>0.6</d>
<d>0.7</d>
<d>0.8</d>
<d>0.9</d>
<d>1</d>
</Subcolumn>
</XAdvancedColumn>
<YColumn Width="84" Decimals="9" Subcolumns="1">
<Title></Title>
<Subcolumn>
<d>0.497179941</d>
<d>0.789110213</d>
<d>0.827614916</d>
<d>0.840503539</d>
<d>0.739166066</d>
<d>0.939262374</d>
<d>0.650073209</d>
<d>0.900273524</d>
<d>0.697276248</d>
<d>0.522313832</d>
</Subcolumn>
</YColumn>
<YColumn Width="84" Decimals="9" Subcolumns="1">
<Title></Title>
<Subcolumn>
<d>0.802586223</d>
<d>0.760359145</d>
<d>0.576406651</d>
<d>0.664290736</d>
<d>0.588678385</d>
<d>0.748218527</d>
<d>0.680917815</d>
<d>0.817102138</d>
<d>0.849432779</d>
<d>0.808919715</d>
</Subcolumn>
</YColumn>
<YColumn Width="84" Decimals="9" Subcolumns="1">
<Title></Title>
<Subcolumn>
<d>0.755548505</d>
<d>0.887301423</d>
<d>0.744695112</d>
<d>0.667059423</d>
<d>0.716165887</d>
<d>0.791396312</d>
<d>0.651736567</d>
<d>0.634943101</d>
<d>0.705509169</d>
<d>0.832939983</d>
</Subcolumn>
</YColumn>
<YColumn Width="84" Decimals="9" Subcolumns="1">
<Title></Title>
<Subcolumn>
<d>0.482771442</d>
<d>0.570717231</d>
<d>0.527179558</d>
<d>0.745604076</d>
<d>0.609118515</d>
<d>0.724422437</d>
<d>0.744032851</d>
<d>0.521186528</d>
<d>0.568630411</d>
<d>0.528848841</d>
</Subcolumn>
</YColumn>
</Table>

<!--Analyses, graphs and layouts as compressed binary. Don&apos;t edit this part of the file.-->

<Template dt:dt="bin.base64" xmlns:dt="urn:schemas-microsoft-com:datatypes">eF7sXQl8FDXbz27bZem5UEAUheUQ8KDcpyDlFAUUuRGVs0ARobRFUUTqCR6g4IUo
irzeiicqXp+AiuiLCiqKF4IXICL4grfCN//JZJOdneym7bZ22vz5hcnkeZI8OSfJ
k306qFffvqcN7tHOU5RKCLnZc7PHa7iJZKT3PjLFCBnpJWEIJhCSaPnf8hDiNd5z
yPQwnmg4nfSxB5nwFg1qRkgPwxcw3GTDJRnukJHD8cYz2XANBG7wMOexHADJUgyX
ZrgMw9UwXKbhahvuKMMdbbh6hjuO0PQaGq4xoXloaGhoaGhoVAxg8YF1gM9w1Qzn
N1x1QtcD+M5jzYJvfTqh33usB/DNr4nIGhoaGhoaGv86sEdPIPR7jm85vuPF2atr
aGhoaGhoaGhoaGhoaGhoaGhoaGhoaFAkkJ7G/10SCFmcyJ/qOHLkCDlAPKRaBjTv
hOzxDkrqRHzCW2fiz2BJJtF7eIlkG87sFXA36XrccU9S1cCylLb+iciK9DPf+xF+
ra+0SDUvCog4rmvX7rMvnBa8KCe/IHfG9G6NWme1ahTMmT5hxsTc6ZO7NRo2tG+L
To26n5rctWHvs3oNHTWoTzBvWm5BYXDQsJ4DTu8VbNSiZcseeXnTclq27D20d3DQ
gNOHDA0aabRs2efMRsFGUwoL87q0bHnxxRdnjQNX1oQZF4KxoOWg/Bl5OfmFlwww
EmthRMiaWDixkZENTT1MHCN0Yu6EwlOTq3e9IOeSU40krMTy8nOnF2YNGjc5p++M
/AvHFWbRR6Eh+SCQcvK7tkQMI6KVgHMKhbkTLsgpzJqQnzOucEYoTvWuBYUGebLA
PnXGeMrbtaVFi5FkbmHOhT3y88ddwhMdh1f4uFCSNFQKhriWKCNy83Om5RQUjOk5
QhRPkrglYEHhuMKcvtPGTRYTRA6Tc/JPbdW1JfOa8rYM1WJLVopQmGMmQgkGDew3
Iz/30hnTC8dNG5xTUFkaRlIsxDSEnnZqxzZdW5oeeWrl3xJn5efmGAIXGiOs8rSD
Q6HEGmwdXoPOCZZ/UwyZMG6aUU2VpxlsBUIcs/+3roDjYLjxAcqdUMnmI4dChRqh
Qs5GTOBKNxQkBQu1RgUZEgWzxg+l+eSNM5ZkY3KnT5oxhtWZU1sMGjhoUO9B4O01
Y2LOmeMuzOFVFaofx6wkrababFETjWw3seHElotZCkGiHu3C11JRRXBqJ2lDCS0l
NJXYfiEph+aPm14wzfy0DTFlMcV2dcUrFEkQ799vhaG5MyaPi5TRVdUuKYMgT27B
jBbj/uW6tucUNqX2mDh1VkFhzkQEDs6ZEJqg3NQQ9mTUCmhLNUotRyeZX5xOrTuJ
3x4W3L5j2CdJbCS8OQn/r/cDozdX8o5gL6EtWdZ4LVqHLe5iBHdq28opuH2nthW5
BxhVcbqxOsni3+7euRfmTMdRUeXoACoFtKUapZajk2iDd27v1A86tQvvNRW3H0R8
zipL+0cUTBCyYn6nufDDpo+TfccqSfNEKaEt2Sj1HJ1EB6Irv9TO9WT/kFXCrmAv
oi1d1nySj7Ik2N3f6ry8iY7TWaVofVnhBEH/7b2rJKceg04fTpVsvEUsMVu1ymrT
SvW4rPCSPKFNIxrHVmFD7Q0VEjZaHpGyykSNloooqVxQtgS3S8oE7drS1FCemuwr
wo+yvaSaqVqm6JGfO24aV67GxCuCURmaDjXiUtx0bhYUxL7suab5lyMGLjd9OxoS
cqv5k3GgDWFviAQu+gZR+Bt+oMbfWHo3mL7sI4TcRj6qRn+OhvCSS1u8n75pMzUa
GhoaGhrxBz7Md4XM2m0gF3npSkBDo3zhze5srq+N/mddsqRoQ+oKb3ZUJ7WM/wfP
uDg4xNhIFQRnTAq2bjEhZ9o0kkya2y5RYt2a6KXPcErVBKqB1VEX04BUMkHFeMhf
JpWQNeRkQvcC9ruzMEMFZ8cpoX0G0NWMDz6284gFf/Ayg7N+MWLEG93M/VIiOcvD
DWwOsvygny34Bwv+FWQBoXsq1JUY26kkYopOEHNxgpizE041DYeB52TyA2F1SkOo
lJjlIWlJjYxh14axh51bHUJ3bxip2MEdQ+gu7lhCd3LdSZDQHFl9eBORFvWzZ7aZ
LsbyhTnjphcEL84tnBIc0luIHYKfl55tqLNpWs7MbKurxMx2wkrMbKOsxIy6VmZG
oygzo/WUmdHMyszoDw7MycEgiWRGxxGZU4JRmNHDlJnRFZWZ0WeVmdG5lZkxCpSZ
0cWVmTGulJkxUJSZMVKVmTGklZkx9pWZMUkoM2M2UWbGtKPMjPlJmRkTmTIzZjxl
ZkyNysyYQx2Y+5LeSXTo90Mn1tDQqBTAYI8vEoqR5v55FfVpTnu0fuZhksQzHu5R
zLIEqSPVj8w87gxteh4JbYMMXunWkckGqMVg0zmgFkP8MKjF0FIBajG0VIBaDC0V
oBZDSwWoxdBSAWoxtFSAWgwtFaAWQ0sFqMXQUgFqMcpbqs6WSslbWpVSG61SUgOq
IVKl5CXxUSkhBlcpscP0WOAqJdUY8UY30pSgZw7x0HLADbX8oA8T/CvMvz2HXoue
LMZgHCLEVJwgpuwEriZqVaHVRGxUI0yriTj8Wk0kwK/VRAL8Wk0kwK/VRFpNpKFR
mYDBHl9oNVE0p9VEHFoqQC2GlgpQi6GlAtRiaKkAtRhaKkAthpYKUIuhpQLUYmip
ALUYWipALUbppGJqoqTSqonaaTWRGlANkWoiGNGPh5oIB8ZcTZRKaL3HAlcTqcaI
N7qRUwl6YV+rHHCnWU/Q+wn+0wX/GYJ/BXmY0PEAJYKYEuMQwVOnadjpYo5OEKVw
ApOMwU7n6qd2FVr9hNwBhGn1E4dfq58E+LX6SYBfq58E+LX6SaufNDQqEzDY4wut
formtPqJQ0sFqMXQUgFqMbRUgFoMLRWgFkNLBajF0FIBajG0VIBaDC0VoBZDSwWo
xSidVEz95Cum+gnHWmHqp06m+qmAaP1TLKAaIvVPPhIf/RPOdbn+iR3cxgLXP6nG
iDe6kSUER9jDPbQccCMsP+gjBf8owX+O4B8t+M8V/OcJ/vMF/xjBP9byA+ME/wqy
wEMHWarhROlYTBFcYiqXnc5KweSy01nJnFPnpWWw01kNyOisVmR0VlMyOqs9GZ3V
qIw+NgZdrHknOtfZdarQOjvkCiBM6+w4/FpnJ8CvdXYC/FpnJ8CvdXZaZ6ehUZmA
wR5faJ1dNKd1dhxaKkAthpYKUIuhpQLUYmipALUYWipALYaWClCLoaUC1GJoqQC1
GFoqQC1G6aRiOrtqxdTZ4aQq/I9VddBKO0WgGiKVdtVIfJR2OH7lSjt2vhoLXGmn
GiPe6EbGE5zkjffQcsBNsPygTxT8OYJ/kuCfLPinCP5cwb+C+D101KDGxNwYhwgu
Ac3HTmdSsXzsdFFSJzDpGex0ViIZnZVSRmcll9G5EqxFhVaCITcAYVoJxuHXSjAB
fq0EE+DXSjABfq0E00owDY3KBAz2+EIrwaI5rQTj0FIBajG0VIBaDC0VoBZDSwWo
xdBSAWoxtFSAWgwtFaAWQ0sFqMXQUgFqMUonFVOC+UurBGtL/76WVoLFBqohUgnm
J/FRguGQlCvB2CloLHAlmGqMeKMbudbIOYVM9dBywF1g+UGfJvgvFPzTBf8MwZ8n
+GcK/nzBXyD4Cy0/sIJAuYRxgQN4USLGLYJLSWWx05nkTBY7nZXGOXVeQgY7nZVa
Rmc1IaOz2pHRWY3J6KwWZXSxZp3oXBHXukIr4pALgDCtiOPwa0WcAL9WxAnwa0Wc
AL9WxGlFnIZGZQIGe3yhFXHRnFbEcWipALUYWipALYaWClCLoaUC1GJoqQC1GFoq
QC2GlgpQi6GlAtRiaKkAtRilk4op4qqXVhHXoZVWxCkC1RCpiKtO4qOIw1EmV8Sx
s8pY4Io41RjxRjdyD8Gx9CqrHHBPWE/QnxT8Twn+pwX/M4L/WcG/WvA/J/ifF/wv
WH5gjeB/UfCvIA976IjD8bkoKUtFBJeeyminsxIxGe10Vkrn1HnJmYx2OqsNBjud
1ZCMzmpNRmc1KaOz2pXRxRp3oout4EQXW8aJzhV87Su0gg+pAwjTCj4Ov1bwCfBr
BZ8Av1bwCfBrBZ9W8GloVCZgsMcXWsEXzWkFH4eWClCLoaUC1GJoqQC1GFoqQC2G
lgpQi6GlAtRiaKkAtRhaKkAthpYKUItROqmYgi+5mAo+dgzNf2k3JW8S0cq9WEA1
RCr3kkl8lHs4bOTKPXaaGAtcuacaI97oRi41ZX7NKgfcWusJ+jrBv17wvy743xD8
bwr+DYL/LcG/UfCvIP08dCSh3kQpGIeItaFwmr+dzqRl+dvprATOqfNSMdjprKQy
Oiu9jM5qREZntSSjs5qT0blirXOFVqwhVQBhWrHG4deKNQF+rVgT4NeKNQF+rVjT
ijUNjcoEDPb4QivWojmtWOPQUgFqMbRUgFoMLRWgFkNLBajF0FIBajG0VIBaDC0V
oBZDSwWoxdBSAWoxSicVU6yllFax1k4r1lSAaohUrKWQ+CjWcCTIFWvszC8WuGJN
NUa80Y2cQXCa/55VDrj3rSfomwX/FsH/geD/UPCvIBsJHRnQEIipMg4RPCeanp0u
5u4EUSInMCkZ7HQmuYzOFVVZFVpRhdQAhGWbadoUVcf3Gi7RoLDqY5NZNq0QZ2Yw
KTPjXZmZzZxKzFpTFYKfdjFlZvRFZWatqQrBrzVVAvxaU6WhoVHBgcEeX1Q+TZW1
mAKt1I5rqpCq1lQxqMXQUgFqMbRUgFoMLRWgFkNLBajF0FIBajG0VIBaDC0VoBZD
SwWoxdBSAWoxRKmYpiq1tJqq9lpTpQJUQ6SmKpXER1OFgzuuqWInc7HANVWqMeKN
buR/BOeqszy0HHAXWX7QLxb8swX/JYL/UsE/R/BfJvjnCv7LBT82zfADRYL/CsF/
peC/SvBfLfivEfzXCv75gn+B4F9BFnjpCMaZslh6OEgmgtcILbedzmqJldtOZzXn
nDqvTVZuO53VMMXVEemzWhelEMFagsFOZ60jo7MWk9HFVnSiF8Wgi63tRBd7gBNd
7BVOdLGnONHF3uNEF3uUE13sZU50sec50blGtE2F1ogiFQBh+qd7HH6tEBXg1wpR
AX6tEBXg1wpRrRDV0KhMwGCPLyqfQhSTJJ7xcPqnexxaKkAthpYKUIuhpQLUYmip
ALUYWipALYaWClCLoaUC1GJoqQC1GFoqQC1G6aRiCtG00ipEO2iFqApQDZEK0TQS
H4Uojte4QpSdn8UCV4iqxog3upH1BGfBUIuiHHAHrSfohwT/L4L/V8H/m+D/XfD/
Ifj/FPyob+b/2/ID/wj+w4If3Zf54WF+j+BfQfxeOiLRsmJpWE4ieAlpOex0VmpW
Djud1YRz6rx2WDnsdFZjFJ4IBSerRQY7ndWsjM5qW0ZnLSCji63iRBdbyokutp4T
PaxFHeggRqOLLe9E5wrGDhVawYjYAMK0gpHDrxWMAvxawSjArxWMAvxawagVjBoa
lQkY7PGFVjBGc1rByKGlAtRiaKkAtRhaKkAthpYKUIuhpQLUYmipALUYWipALYaW
ClCLoaUC1GKUTiqmYEwvrYKxo1YwqgDVEKlgTCfxUTDiEIwrGKHOQL3HAlcwqsaI
N7qRzwhObKt5aDng/JYf9OqCP1nwpwj+VMGfJvjTBX+G4A8I/hqWH6gp+DMFfy3B
X1vw1xH8Rwn+uoJ/BennpSMV40YsJRwkEMFLTstnp7PaYOWz01kNOafOa42Vz05n
NUlRJyJ9VruiFCJYjTPY6awVZHTWMjK62FpOdLEFnehiqzrRxZZ2oout70QXe4QT
XewlTnSx5zjRueKyS4VWXCIWgDCtuOTwa8WlAL9WXArwa8WlAL9WXGrFpYZGZQIG
e3yhFZfRnFZccmipALUYWipALYaWClCLoaUC1GJoqQC1GFoqQC2GlgpQi6GlAtRi
aKkAtRilk4opLjNKq7jspBWXKkA1RCouM0h8FJcNiKi4DBJa77HAFZeqMeKNbuRS
U+b6HloOsyyWH/Sg4G8o+BsJ/saCv4ngP17wNxX8zQT/CtLPQ0eSqfC1KMyBQwSX
jOZvpzNpWf52OiuBc+q8VAx2OiupjM5KL6OzGpHRWS3J6KzmZHSuWGtZoRVr4AYQ
phVrHH6tWBPg14o1AX6tWBPg14o1rVjT0KhMwGCPL7RiLZrTijUOLRWgFkNLBajF
0FIBajG0VIBaDC0VoBZDSwWoxdBSAWoxtFSAWgwtFaAWo3RSMcVaoLSKtc5asaYC
VEOkYi1A4qNYa0hExVojQus9FrhiTTVGvNGNXGvknEJaeGg54LIsP+gtBX8rwd9a
8LcR/G0FfzvB317wdxD8HS0/sIJM8dBRhcN3USLGLYJLSWWx05nkTBY7nZXGOXVe
QgY7nZVaRmc1IaOz2pHRWY3J6KwWZXSxZp3oXAnXtkIr4cAFIEwr4Tj8WgknwK+V
cAL8WgknwK+VcFoJp6FRmYDBHl9oJVw0p5VwHFoqQC2GlgpQi6GlAtRiaKkAtRha
KkAthpYKUIuhpQLUYmipALUYWipALUbppGJKuBrFVMLhwCxMCde6ldbCqQDVEKmF
q0Hio4VrTEQtXBNC6z0WuBZONUa80Y2cQXCc381DywF3quUHvbvgzxb8PQR/T8G/
gmwkdGhARSCmyjhE8Jxoena6mLsTRImcwKRksNOZ5DI611R1rNCaKlABhGlNFYdf
a6oE+LWmSoBfa6oE+LWmSmuqNDQqEzDY4wutqYrmtKaKQ0sFqMXQUgFqMbRUgFoM
LRWgFkNLBajF0FIBajG0VIBaDC0VoBZDSwWoxSidVExTVbPUmqrWWlOlAlRDpKaq
JomPpup4ImqqmhJa77HANVWqMeKNbkaHQ3lhDhHlgDvd8oN+huDvL/hXkAWEDgHU
lRibcYgQU3SCmIsTxJydwDVKp1RojVID838apjVKHH6tURLg1xolAX6tURLg1xol
rVHS0KhMwGCPL7RGKZrTGiUOLRWgFkNLBajF0FIBajG0VIBaDC0VoBZDSwWoxdBS
AWoxtFSAWgwtFaAWo3RSdc72F9EUqpunJK1bTMiZNo1EaoZMeLOjJlyVgGpgdZRC
WlmtkGo4pvdBNc+z3FCbO1u7CuUGEHpICL8d2PY2h8do7eB91SytEVU+1PT6yASv
c5gVJcxh9GTne80husjsCUATKyYc0xiyGIeNGEzf5DQkAaSKDsjipIapg1kZzbzz
cPLPqGd5KH/2JZybUhE6SEpFXmdLqej3gx2oGUVd+UuoNuDPsfzmIPLQUcTKIqI6
DQmEqpuQg6YGAVniiRNj4CaSTWh1AvakWFXZgWxF3GxxLjGbC3ieBEn4jIt0oDxg
ecBlZNOisjycioowpMqa1S6PtKjIHE+qG4xVVPs7g10vzYrKREfPAGSiY0woiU6J
5Sk6ui3gQtExpgAXio4BD7hK9OusocyPMf3WcshjCAU1X/ilGXFttDuBuhC8vOBV
HagG+dooSOiEvdxyB7Wr0I6tjeC3w742srzmLY7Zxv9vW6PVKQxAPwANIRg92QVe
852ujZBesxAv7TkAOAHVtRFyYXGirI3msZUTS0ukjg1Rre4cRs2bh9VPK4uCWkGe
2QX03Ywv+PMEP50+ac3xnPGcRKj9azM/D18VsdrD/AQXmj5/DQUjAFdHCFnRjzJX
PrAyrjDKeJBke8NXgaiFoMXF8C2b5TWqLIJE3idqmPecMJkMJx6Ppwf+2+oQxpch
GLZs0cKWGXT5EAn57gJTHforpkj06Hi4JONf5G4FU3Cm9YQDJ1vBicsq9sQUtNdD
/eJuRXEKwtz97qYBMD1i+TeF/MvuPBomRxhPyE9IUci/7M47Q/62bZ8V+DeF/JMm
fS/EJd05T2rIb+QV8k+a1DTkb9u2bchvzNZC3AFC3FFC3ElC3AIhblH3g+bGQ1yx
0iaN7Az6Xf19a2hl7jzoGOC3pwPI1/600+NLDbC4eKLTs/RADxL6aRE7PeKGHZgG
yIYERGH7fnSLUZ9kLeo7cEeom3zf86uGP+7YbL5j5FEEshndt/ra3bd34/yjV479
etXqTVL++n/f0+XstV+F+IevPODf2l3On5Dy/DuXnLgzxH9inf0z6myQ8y9sNW/i
/83m8gyfd82OLWO2SPk73nfy8Oc/4/xLl/S6dXOTD6X8vfz/XBd8gfMfOm5qq3s8
8vTH5dXP+Xs+l3/HxfedWmebvD6f6rTwvYeTvw7xL3t94xff7ntXyr+0+pTjnvVx
/m3vbtidu2ujlH/a9Qfe+P5rLs+wZds3Ts5+Q8rvG3L5pC2Pcv7z75z81LG1N0j5
z+pwTt1Jazj/snqfL1695C0p/9I+G3sN78rl3/jGj0X728rLe2W1C05pchbnHzf6
xcxFs+X1+eaKjv55db4J8U+/teNLge5y/qLO/dYvT/g2xL/u6axdiXXl7Vtzy6rH
C2d/F+K/8rrzd2zKeV/K/8iFOS/4Pt4V4j/uyNT6Xf8r59+Wuvisey/YG+J/LuvU
0U+8tCaC/yDZnBA+lbODS3CK0O/6Xb+7452v5K1Ptk+2kgfYSlc84WMIkvB9g8qB
YqK1XGij9atqQDXIzxDhZPpVu25Pu3/fFUe/Ko6AFYb70CCwTSw2r38b/w/ysN0V
HaZw7Ico0K+ib9AzRPyWBU9QkArbEbBYqmeIbFsPF+UMMU/Urw7xUP5IHSlCh0qp
yGuYA5XuWVAiAFTkialGpkFFnYiQqhXlGlT2Y0Wxclhl2CE/4+AaVLblQrpsG8bE
dCoSwsSzB+UiiQs4IHqR4HcqUqwdJNoYkIkuKr6iik7TKU/R0QEBF4qO0QG4SnT5
6iDJSd0YtlTQ6kY5UA3ypUKQaHWjm1xx1I3iCCgw3BuEGq62hzEwdSN+6A++cHVj
A0LPBUABglYs9q66VChvdWOQxFA3YoVs+en0iZICyJnOP/TY83+eSHUjM4rAIP3e
2pcQTme3yBgJitVHp8dIFGcxgXTZt8FuxYEV7qCHhomLCcarFRlMZq3IKJN31cEA
vz0dQL6qoJ0+aIUjrtjpYX4AYaIiQ+z0XJFhLTecFBnX3HVTZsHKz0LdpHv3Uy74
5dV3bAen/mxGf23l81POPbgtxN918ci3BtV7Rcp/0o8FG2ss5/zd7lgwY0Gv+6X8
RZ4+j+38msuT1fCkuvVuelbK/+7t9XeMHM7TH75hwHFN5tsP0jl/rX0vTLrpf1tD
/J0+OeOVt7Pfk/JveqJ23Yd2fBLiH9Ky08hP68vr56Th353YqsmnIf77Dp028dx2
9oN0zn/h5mcnntWGy3/g8RZHahxvV6xw/t7Lj1v2xvyPQ/yHF7U4c/DRH0j5P7mn
+8JL9/LyXpS9dd+0BvaDes7f8sv3kjbeyNN/aMyaOrfOlPM3n3DS2f93MpUX7/9d
7plz+Rt2xQTnv+7Hmq89lE/lxfvqFnObJ73xXyn/qpeOPDL5+o9C/F0S1h7o10me
/uPv3Nho/OtcnlPH/NGj7hS74obzb1xV57YxJ/H+llzwyil/LXtGyn/ydd/9OaXx
FyH+De+2e6jjs6uk/MN6BUZ0aMMVYRm+xv7Mguel/JlLR/VpuYcrSp6ae8PuRjXf
jODXigz9rt8r2ztXZFif7DBFhn1RwVa68VJkpFjLhXZakaEGVIP8dAJOpsjQCo2K
54qjyGAbZLRxbW8ymeRNcQxjQCeB60OsE4J8r7mOp6cTvQkdsEgBju0IWCzV0wm2
3YaLcjqRJyoy+hLKH6mqQOhpUirywgVkZyr6/elSKiaeMxyodL+D2gBAhbyoRZkS
BPUpQvkEg8+qyA7JiBXLKtKO4pxbIF22hWNiOhUJYeK5hXKRxMUfEL1I8DsVKdbu
E/0DkIkuHsdHFZ1mXp6io/MCLhQdIwtwoegY9oALRcecBLhKdPl6LtVJ9RS2uNOq
JzlQDfLFXZBo1ZObXHmonvoTOnrCVU/IGSc5oABBKxZ7V13clbfqaSApruoJJQWQ
cxKhY2WS4f70WPl5+MINdSVCusqxL9ycTtuRMRIUq49Oj5EozhIO6bJvAxPYXri/
PDRMXMIxXq16YjJr1VOZvKsOBvjt6QDyVQXt9JgDAMQVO31nK0xUPYmdnquerOWG
k+ppduag74acxlUr634a/Mchz9vmO98518pm9Ffv2/lE2vn8aH9f/re7ln5jV/Vw
/v4n7vDXzuCqhiY9Ruw+9Wv7bz44/4GWa5qOu5aqOvBe+OsZO2ffIedf8WTDq195
mP4mAe9br34/PW+wXP4Fj7y1pG82/U0I3m888RX/m6/aVR+cv9vov854dSbnP+rU
389Y8Zac/9mDTy5q9gTNH+9/pG54oOc7cv7sLWc+HpxLVVl479zs9lezku2/GeL8
Kw8eOnhfLuf/fGfrwr8/lZe3w/J3/756FFVd4P3OlnVWn97Krorh/HWafTpkTpPX
Q/wn3vBE0yv3rpPyp1783bT699P08L6t+oQmrw1YL+V/8/iFj5wwl/Nf9ttTBzr+
R57+PW8/v3HBTZy/06ZXxi97da2U/9UBB0c/Np3WH94/u6zuFT8+9X9S/kPvP3x6
4q28P88dt6f+0O/tqk7O7x3+4JJze3LVYm6/Xh13ROG/8OnCR/rkcdXTyLYLJtRK
elXK/8N5xzc/+5HdIf4mY6Zv+e/GSH6tetLv+r2yvXPVk/XJDlM92RcVbKUbL9VT
mrFcwGKik5l3gXU8EQFvtj6esIBqkB9PwMXSPUVzdt2IdmXr2PEE/Hbg2ys7nlhB
6I9o2Pc503AHEjJJ70S2vaLjFO5yYh0R5HvNfkKPJ+YS2uKgIBW2JWCxVI8n2H4b
LsrxRJ6oexruofyRGiKEjpBSkddIKRX9fpSUipnnHCkVm5zRUipmwnOlVLTfeVIq
ZrfzpVTU8BgpFXU/VkpFq41zoNItHNoXABUtgD8Oxc607Ycy6CEilA9l+IcC2SEZ
M6KFeBzFIF22K2ViOhUJYeJRjHKRxPUsEL1I8DsVKdaGGj0ekIkuahiiik7TKU/R
MRwBF4qOuQJwoeiYyAAXio5ZFnCh6PgEAC4UHd8nwIWi4+MJuFB0fNkBF4qOZQfg
QtHHuld0LNgAV4ku37+nG0Lh9yhhVw3CN/P6roEcqAb5Zj5I9F0DNzm2mYffDoxr
cTPPgAHVzPgfVnSjhbG7BjcQOnrC7xrcaMbgCFpPcAKqm/nyvmuwkBT3rgFKCiBn
THA4vJxkOK/Xys/Dt7WoKxHSPaB9W+ukXkXGSFCsPjo/RqI4G1ykyz4OTGB74RK8
NEzc4DJenPfA6bsG+q5BmbyrDgb47ekA8mUF7fSYAwDEFTt9NysMAyVI6CAVOz3i
hisPnC4bjNhLxqUW8N/tdX33SMP+F79svuPPiVM0z2b0m4NH+u7qy3+X+UIdMqHt
cKrMduJ//c7bHhq+n/9O8bHknXNWnUcvJzjxt9h4pSdpG79s8ODMN+8a1odeNnDi
P7h3W4OxP3P+/n1vWv9FS6qMd+LvdfFVp91rGXDE+7ef1v964nNUWe/EP3Tyyjde
eYjz78v4/OS8PXJ5Bqbvat32K84/87WrJ857V85/1+y+X9Q+hvN/0jt9+3UD5PJc
P9Ez6896vLwtd729v3cKvQzhxD/z2pv6pl3MlelXN9z4cbOP5PV//IF5WS88ydvr
6O6nfTn2Barsd+LfPafVvRPr8d/FDqnZ/sf//UQvGzjxt3/wm/RDazh/frepS+Zu
k/PP2zKs0b0f8sswPZcXbGi3iV6GcOLv1P7Z7seczH+3On36E4Xvj5OnP3TRtdsf
OswvD7w6tsO5D9eRp39T0ukbksZtD/EHvjr66faz6GUGJ/59HbI6PvgRNzja9u8z
2+4+gV6WcOJvc/nnJKfWnhD/uUeNvv+khvR3sZy/Sba+bKDf9Xtle99KMghVXLFv
djXxtoF9WQFG+ON12yDDWDBgG9S6g75uoAhUg/yEAq441w3s6m/tytdFu25gP6EQ
R8A0w91rEBAXyESYN5Os9bIdFh2ocDcR65Qg32umSU8oFhE6ZEFBKmxXwGKpnlCw
LTdclBOKPPG6wXgP5Y9UoSN0gpSKvCZKqej3OVIqpp5JUirOdSZLqZgKp0ipqL1c
ByrdTaGeAVBRE5hv2fmy/XwELSVC+XyEz9jIDsmYES3E41QE6bINIhPTqUgIE09F
lIskriyB6EWC36lIsfa26HmATHTxtD+q6DSd8hQdwwJwoegYs4ALRceEArhQdMx2
gAtFx1QMuFB0fCcAF4qOjxjgKtHlm4uAIVQdYv/7ouE7Da0LlQPVIN9pBInWhbrJ
FUcXKo6AAqL+u+ulhI6ecF3onYSeLIICBK1Y7F11p1HeutBlpLi6UJQUQM6oa8x5
kwz3o8fKz8PX+qgrEdKFsX2t76T+QcZIUKw+OkFGojirfqTLvg5MYHvh9nlomLjq
Z7xaF8pk1rrQMnlXHQzw29MB5OsK2ukxBwCIW43wTt/DCsNACRI6SMVOj7i2o00n
Zeitz+5aVrfml6GOsvaaaf1v/K/9r6UFsxn99rPm3bAgiStPaz3x6MS16+xGTzn/
XP+Aras+48qszbe9+PBDjz4n5U/+9trlrXdy5d3TfbxXHTnNblSY8/f9ecx5FxBu
1HbnNwPvGdP/BSn/gV3jC7Zt4/JMrp71Rtdq9l/Ocn5vwf9+W3IXVw62GLmgfu2b
n5by//Jq95QW27n8v9yT3PfQow9J+Zs+e7b/0We5/HNqbVuceZLd6Czn39xryvgb
l3J57m7+1AcFV8vr58uLTnzs8au48vHaY9qf/fSYp6T8tdMe6NT9Cy5PYp95H29f
vVrK/8qMtEHZ+3h9vtnq6TF9W9mN2nL+hI/bD7q7H0//4ztS5x84Vp7++At25u//
iqf/2KyOfx3aJG/foff2vfJ/s7ly88Ffsn6v/9WTUv5mr61KXruIK087z/tiGnlN
Xv8/Lm4wdPgWPl68Db/8vvcMuTxvvH3x1lnv8r/ueGGLG84e9z1VtjrxJ9WZMfDK
nVwZenfbMz9POD9SHq0M1e/6vbK9bzVHMtbHoY+2X9SG2hcWbCkfL21oDWvJ0Jba
HNba0NhANcjPKOCKow0VnV1Tp13Zu2jaULSl7IyCaUPZaj7TcFMSMskrCWyPRQcq
3N3EOifI95qfdHpGcRehrQ4K6zliLNUzCrbphotyRpEnakOneih/pGYRoRdIqchr
mpSKfn+hlIqpZ7qUCm3oDCkVU2GelIr2mymlYr+UL6WihgukVNR9oQOV7tTQggCo
qOMaRK5nRR8QoXz2wr8FyA7JmBEtxOPEBemyzScT06lICBNPXJSLJC5agehFgt+p
SLH2zejTgEx0UZUQVXSaTnmKjgEHuFB0zAaAC0XHVAW4UHTMo4ALRcckD7hQdHyB
ABeKjs8j4ELR8e0GXCg6FhaAC0XHqgdwlejyfW5N4qCYt216tWJeDlSDfNMbJFox
7yZXHor5hwkdPeGK+UcIPeUGBQhasdi76qa3vBXzj5IYinnBTydQlBRgkyV+2DTJ
cIc8Vn4evjlEXYmQ7qTsm0MnXSQyRoJi9dEJMhLF2SYiXfZ1YALbC/eLh4aJ20TG
i3MROK2Y14r5MnlXHQzw29MB5OsK2ukxBwCIK3b6PkJYkNBBKnZ6xLWdsjsp5tet
KJx+RS7/FeWUW2d8s/p4qmjkv4psms3ok5c27Vd7CFc0/rXSv/PzT6hi1Yn/Pyv7
vtm02Vch/o7X3NM5oR1VJDvxL36kxbQPXv08xN9v15Gfd15n/5Us5795+y/3p+dw
RWyTx4+8+MFN9l9Nc/63f8u544vJXBH7yAP/7Hhttf1XrJz/5Ccf2FnQjfOvfmXM
S/Vz7L/i5vwdPrp68TWvcv5zLspfMmWpnD9z4OZ1o9/mv/oOHOnR6bNp1AS2E/9T
4z1zcutx/oNfP3Ne/TPk9bnn3Ta+//7K67NbQbO0JkTOn3j+M0u/vJtfvEj8yn/S
mWe/JOV//ejDhxfezBXVFwWNCW4kNXHuxO/vMHX8Z7u4PLPPqd+xdiN6EYTzNwnx
//fN0YPuHcV/FVyt1iW/ekdQRbUT/4Gpb3WuN533t+lnXvXBo2n2/sz5T7vu8/b3
FfH+PHn04Um//PqalP+x/zw25+Wm34T4+x1s4ulW+0XznSvOG4X4U9a/O3Bgi10h
/pGbRv1W7085/8ixqf6h1faG+PvU/qTO/gT7X6/Winn9rt8r3ztXzIc+2mGKefvC
It6K+UxrydChlVbMKwLVID+jgCupYp45tj/UruxdNMU82lR2RrGCUKvobGubabje
iZlkqYNV9MeJdU6Q7yUwwkjPKB4jXDHPeo8YS/WMgm264aKcUeSJivlVhPJHqqIR
+oSUiryelFLR75+SUjH1PC2lQjH/jJSKqfBZKRXtt1pKxX7pOSkVNfy8lIq6f0FK
xfJsjZSKNn3RgUp3eWh9AFS0D/qPTKmP/iNC+dyGf0eQHZIxI1qIx2kN0mUbVyam
U5EQJp7WKBdJXPAC0YsEv1ORYu25MR4AmegorpLoNPPyFB2DFXCh6JhJABeKjmkO
cKHomIMBF4qODwTgQtHx9QJcKDo+rYALRcd3H3Ch6FiUAC4UHSsmwIWiYzkHuFB0
rDUBV4kuP5moRRyuUtiOKfRVCjlQDfJjiiDRVync5AaQsr9K8RKhoyf8KsXLhOol
QAGCViz2rnpMUd5XKV4hMa5S4HTO8tMJFCUFkDNKhIOcSYb722Pl5+FbctSVCOn+
1b4ld9IeI2MkKFYfnSAjAQFERNucI132dWAC2wv3j4eGiZtzxgseuFDh9FUK/jVk
x3zgEqHf1d9VBwP89nQA+bqCdnrMAQDiip3+dCsMAyVI6CAVOz3i2vQiTlcpjh1W
u/q2WVz1vHxdp/7HjrWrzk/MZvRqq/of8WVxVXv/dSd/+9Qgu6qa8z+edXud7NMF
A9w3bLj+wJfUxoETf+GcnDXf7OZXBQpO6795Yxr9Tb4T/0/bPsw4cCHnn//txjqb
lj0q5f/7f1t7JaRy/la+C4s2ZtHfwDvxz/hlGHn72k9D/IlHVV89aCm1ieDEv3hh
zy96fczTP+2V7be8/5Jc/qNnX/jXMU/w9Cc3Pea55efYrwpwfm//rcsKJ/H6vHL1
lBt+uOFxKf+TI+5a8WxLnv6zmRecNuAauTzXdzgwYs97nD/hUJ0bz5pPbTo48f/x
v9oNP76H8/+WOKL9wm12A+Wc/5evpzxy8w38KsWVgev+71iP/SqF0N/ajt++ch3v
b/fl/TDiqyHy+v/8qJ8a/3Mdv3rxxTWzh/n/kac/o/uItjnn8L/+/vOH93Se3sV+
NYjzfzRryjO31/02xP/548s/XlhDzp+f0/ybi77jVyle+7xe1hOZcv7/bPnpk9w5
/CrF8+ty2nX5z8M2/qbZ+iqFftfvle2dX6UIfbTDrlLYFxZsKR+vqxS1jQUDtJht
p+RNss4nIuDN1ucTFlAN8vMJuJJco7Cr97UrH8fOJ+C3A+to2fnECkKvUYAHyDRc
v4RMcreDfYP/I9YZQb7X7B/0fOJVwq9RsHMIMZbq+QTbcMNFOZ/IE69RvEYof6Ty
H6FrpVTktU5KRb9fL6Vi2nldSsUE9IaUimnwTSkV7bdBSsVe6S0pFTW80YFK92Fo
IwBU1CL+jCc7mrafrKCVRSifrPCZHtkhGTOihXicpyBdtrVkYjoVCWHieYpykcQl
KRC9SPA7FSnWrhi9FpCJLioKoopOMy9P0dda4S4UfZ0V7kLR11vhLhQdMyXgQtEx
jQMuFB3fGMCFom+wwl0oOr7OgAtFx9IBcJXo8q1gHUMoHDiFmwHg+0Ktt5YD1SDf
FwaJ1lu7yZWH3vptQkdPuN76HUIPgUEBglYs9q66LyxvvfV/SXH11igpgJxRGtya
mWS4RK+Vn4fvrlBXIqRbEfvuyklVh4yRoFh9dHKMRHH2WUiXfRmYwPbCJXlpmLjP
Yrw4OoDTemutty6Td9XBAL89HUC+pqCdHnMAgLhipx9ohWGgBAkdpGKnR1zhENpJ
Z/1M93tXP7mP//z5qatzL247y/5zeP7z57ylS99emsr57xry8k1fFdp13Jz/o8X+
52+fxfkvuHfvvQPftesQOf/zl+5suvlqzt/tldsW3ttSzp8SXJSycA7nn9Fkydtt
atj/yDTnr1O78fjOX3EdZYd7nrvu6H3y8mY9d3fy659w/hPfvu36/B/sP2/n/Gkv
pB/zzER+B2Dn2c2/u3+q/Y9Yc/7t/b/8tdsWzr/V91nqpjfkPz+fuOXRhc22c3mm
3FJ9+N4dcvmPXr3ymOmDOH/2Mce9faDdi1L+Vw9+XfTzIi5Pwo4lbW+aIq//589t
vnLFp0L6zzZfML6rXP6CQ31mrrmdt9f5S7/7rMsHcv4tuwb3eXEsN09xzNgxY7YG
7Tp0zn9Krc3VZvn5z/Nb1Oo07qoI8wWc/763PluVdhTXQbf6bt3S5T67TpnzZ6f9
sDL/zu9D/C888WXeWcPtOnrOn3zXdX+Sv7id/ZW/J7Za/I79zgDnv/7qly458gnX
Wb+5931/s22R7aV11vpdv1e2963muhifc/ODnSjqq+0LCnDBHy999VHWUqGd1ler
ANUgP5eAU9FX2/Wm2v07Lpq+Otq5xApC9dUYOECm4X73ZJIB3kh99bvEOhvI95oD
mp5LbCJcX41U2F6AxVI9l2Abbbgo5xJ5or76PUL5I/W3CH1fSkVem6VU9PstUiqm
nQ+kVNTAhw5Uug9CXQGgojRHEbneGLUtQvlkg8+4yA7JiNUej/MMpMu2dkxMpyIh
TDzPUC6SuCwEohcJfqcixdqVovcAMtHFQ/qootPMy1N0dG3AhaJj3AEuFB2TAuBC
0TFjAS4UHdMp4CrR5cvUuk66NGHNqnVpcqAa5GvWING6NDc5tmaF345oa9YCoq5L
+4jQ0ROuS9tK6OEUKEBjKxZ7V12zlrcu7WMSQ5cm+OnkiZICyDmFYPahJ+8/eSJ1
aagrEdLlmX3F6aQ+QMZIUKw+OjlGojhrT6TLvgxMYHvh9ntomLj2ZLzY1sBpXZrW
pZXJu+pggN+eDiBfU9BOjzmAHZ2JnR4zBsJEXZrY6bkuzVxsOOnSRj48/+/XlnPd
RseZlz56y8PUlDOyoqibzeh/zfpz8MhvuG7jxA9WzfVXp7oQJ/6caus719nN+e8f
N+ratT9TXZQT/wk/3DbnjNe4PPV//c/7bQ+vlfIX7G1a86+5gq7u2xd+m/hfuTzL
61z327WbuO4n9UDCmKLH7X/Tm/OfV9gsM/NHzv/jtbeN++Fyqttw4l/+e8ZrDfxc
F9XXv/6Jxg/Z/6Y35+867eQHrn+Rp79o2QUr9y+z/w1tzv/H9dnXvDyAl/eE27O6
XjmO/t7ViX9Tm9wTvpzM63/4k3cl121h/xvUnP+n/Q2OrpXMdVGXnJzxcIvl9r+J
zfkH7J7SrtunPP3B7dM/WFH7CSn/go9q/jO1A9ddDdvw6sHOM+TpP9Rlx21XFXH+
/fPmvdhnkf1vknP+6g/fdXXSOK7r+nlN5kXzbpC379jZr/xzSVf++8w1NyddtXUg
NX3uxN/gn3kdjlvE+T+v2WzxTWPl5W381oE1j0z/IcQ/bmGnnk92s/9Nb86f2uuT
dw4Wct2bZ9uwW2Zvj+w/Wpem3/V7ZXvnujTzgx2mS7MvKOKtSzvaWiq017o0FaAa
5OcScCq6tJI6uy5Iu9I5di4Bvx2ZRH4usYJQXRp4GO/Nvkzyra8WYzEHKdw2Yp0N
5HvN1Tk9l/iE0BYFBbHZXoDFUj2XYBttuCjnEnmiLm2Wh/JH6rQQepGUirwullLR
72dLqZh2LpFSMQFdKqViGpwjpaL9LpNSMV3OlVJRw5dLqaj7eVIqlmVFUipmhCuk
1DTDXSmlphvuKik1w3BXS6lYEl4jpdYw3LVSKs6q50up6KULHKh0r4r+DICKHnc0
kes7t1m8DMqnT/yriOyQjBnRQjzOnJAu234zMZ2KhDDxzEm5SOLSHYheJPidihTr
5AAjHJCJLipSoopO0ylP0TH9AC4UHXMj4ELRMXEDLhQdXxXAhaLjkwe4UHR8jwEX
io7FAuBC0bGSAVwoOpZZgAtFxxoQcKHoRe4VHatnwIWiY2kPuFB07DsAF4qOTRHg
QtGxYwNcKDq2k4ALRcdeF3Ch6NiIA64SXX4IfQxxuCknnEjrm3JyoBrkJ9JBom/K
ucmVx025fYSOnvCbcj8RqnoGBQhasdi76ol0ed+U209i3JSDIsby08kTJQWQM8bJ
MYTeq/nVY+Xn4WeVqCsRYZMnBZ087WeVTpeDkDESFKuPTo6RKM6pJdJlXwYmsL1w
v3lomHhqyXihloALFU7flONfQqbRAZcI/a7+rjoY4LenA8jXFLTTYw4AEFfs9MOs
MAyUIKGDVOz0iCuov51uyvX9eMH6hl245f3Aji/3HjvE/pcP2mUz+vd7d50+5TC3
dH/3jF87LhtDb9Y58V9wZ4utXxRyS/ef3P1lwe5f5Pxtj/Hvzvib8xd4LxueUmj/
ywqc//y6Dyc1TOCW8QMNh//26yK7lQHO32HCr+9+dC/nP9hlQs3xl8rLu/WjLp23
ZX0Z4h8+/uKJ+dPsVgk4/7bfNr33Sz9+U+44zzPHZ+yU85/YeOOk8ffxm3KHOxcU
nTZcLv/POyY2v7MD53/1ks/vrbbFbvWA8/eZP8d35BDnP+62q665/Sz7X2Lg/I2P
6tD8uXR+E2/pR0kXntdXLv/uzUf/Pe1Tzt/0iU8X+W58Uco/tXWXwIs385t1O5fv
zfqjid2qhSDPY4MferE2vyn34f3rEheOkLdXhy9TG+aO+C7Ef8YJjRu1uE1e3qGL
fn38gcs4/70bB9+6/NZXpPw/7Lp9Imm7O8TvWznkrBuvkvfngdsO/npcPW5F4rLq
vy5fROTt+/W7X63c+fOPIf4u+zd+fckNqyL49U05/a7fK9s7vylnfrDDbsrZFxTg
gj9eN+XqWUuFDvqmnApQDfJzCbh43pSz3+zSLr4u2k053EiSnUusIPSmHHiATMNl
J2WSW5NqMRZzkML9TKyzgXyv+cGm5xIHCG1hc/9O+F6AxVI9l2Abbbgo5xJ57L4T
8D9C+SNvQyEUZzTOVOR1SEpFv/9FSsW0g/23MxUT0G9SKqbB36VUtN8fUiqmyz+l
VNTwX1Iq6v5vKRU35f6RUjEjHJZScVMOncmZiptyIDlT0Vs8DlS6Z0S/AkBFy9cj
/AjdfgqEnilC+RSIf52QHZIxI1qIx9kP0mXbYCamU5EQJp79KBdJXEID0YsEv1OR
Yu3gMdIAmeiiQiOq6DTz8hSdHdW6UHTMUYALRccECrhQdHq66krR8ekBXCg6vouA
C0XHRxtwoehYUQAuFB3LHcCFomMtBrhQdCwUAReKjlUs4ELR2X7NhaKzSC4UHZsT
wFWiyw/IjiUOt3iE0zJ9i0cOVIP8tCxI9C0eN7nyuMXj9dDRE36LJ8FD1WKgAEEr
FntXPS0r71s8iZ7i3uJBSQE8cEp0LKE6/8MeKz8PP79BXYkImzwp6ORpP79xuriA
jJGgmCadHCNRnJMcpMu+DExge+HwWUCYeJLDeHGgChcqnL7Fw7+E7LQZXCL0u/q7
6mCA354OIF9T0E6POQDAQ+z0o6wwDJQgoYNU7PSIK6jmnG7xPPDB24f3ZvJbLQ26
Ze9vscn+tzxaZTP6s/XOefVgIud/o+i/bY6/1f63VDh/py8aPvRoEb+Vs+C7Gmt+
esf+t1Q4f83G9XO2pPD0PyW1H6mVZr9Vwfn/74693qWz+K2Z/NaL1u617FE58Vfb
uMw/yMtvtczfU2f/T3vk8hTW/PnBtSfw9Af2OWvVf16Ry1P/tW2/rflc+NsxLTf2
PeZL+y0kzn/zmpkfvDeMy3Nl0yMnjNtkv9XC+U/Yt2H3/b34rZlJp/3w2knp1D6T
E3+LJf0bt93P+Z/OvGr2I9fL6+fFYy++/bZR/JbNPbcU1Rr1tv2WEOfffdb2mVtW
cf4zZmTMWvOJvD5/+3veggHbuT2twV369/E1kfefDjfd0mz3Tn6L5/t+T82dsNh+
a4bzH9c48/3zunB7V+/8J/VuTz9qL82J/3C39Zfu+53br3rp5ckv7zjBfsuG85Pm
F1/b18vtV2U98GTWtzXk/N6HWw2/Zye/lbNlw3NfL19jv1XE+W/o+NFxfz3Lb/2c
P+PAhKNeeSiCX9/i0e/6vbK981s85gc77BaPfUEBLvjjdYvnOGup0FHf4lEBqkF+
LgEXz1s8zLF9onbxddFu8dQg8nOJFYTe4gEPkGm43UmZpKuDvSufxzobyPean3J6
LpHkoS0LClJhewEWS/Vcgm204aKcS+SxOyBANWs6ibwhglC/lIq8qkup6PfJUiqm
nRQpFRNQqpSKaTBNSkX7pUupmC4zpFTUcEBKRd3XkFJxi6emlIoZIVNKxW6ulpSK
Wzy1pVTc4qkjpWJJeJSUip5W14FK95vokwAe6DXHEX78bj9BQq8WoXyCxL9syA7J
iCnF49wI6bItNBPTqUgIE8+NlIskLr+B6EWC36lIsXb/GKWATHRRGRJVdEorT9Ex
hQAuFB3zG+BC0TH5Ai4UHV8GwIWi47MFuFB0fFMBF4qODz7gQtGxGgFcKDqWSoAL
Rcc6DnCh6FhkAi4UHStgwIWiY3kOuFB07B0AF4qOjQ3gQtGx6wJcKDq2hICrRJcf
adYnDveuhPNNfe9KDlSD/HwzSPS9Kze58rh3dbSHjp7we1fHeKgiExQgaMVi76rn
m+V976qep7j3rlBSAA+c3NUn9JaGz2vl5+GnZqgrEWGTJwWdPO2nZk5XTZAxEhTT
pJNjJIpzfoZ02ZeBCWwvXDUvDRPPzxgvjsDhQoXT9674l5DpB8AlQr+rv6sOBvjt
6QDyNQXt9JgDADzETn+eFYaBEiR0kIqdHnEFZarTvaupC/6768vrPw51krod7+6a
/z/7PZg22YzedtVHV78/+JMQ/9F/+RfdfJ/9ng3nT18/5J/5f24L8T+SOfCnpN1y
/t8n7nqsxWvcOlO3W/an5m+135vh/F0aBd6aMZ5bfzp72bl//v7Ci1L+L3qm3Jq8
gfMPP/+1pD3ny/knXnnrc5+8w++N5aS/tu/tuXJ5GidsGN8yifO3avrK/Oea2u8J
cf6uh34YuKwut86U2P22R4Ovy+vn6Oatpn63m99L+/yd5im3vCFPf9Exm25c+Rm/
B9b978avPVl3vZR/epv9w5/8k6d/KHHXmTs/k/eHa/I23DV3MU+/YVbK3PzP5fLv
frzOQz0n83tmNTe8M/27bnL+0RlnjxqYw++N+T/P3Nx8sVz+2nv2tfound/rGnj0
60+eWU2e/lNPdjvyTDduPano4g/az2kiT7+g1dFDtu/k1pP+brhhz9G7Xpfyr2lf
OPtxD79H9dGOITkzV8rba3v3G45v+jO/1/Xz2LofTF5A/66iyK/vXel3/V7Z3vm9
K/ODHXbvyr6gABf88bp31cBaKnTS965UgGqQn0vAleTelXgXSLvyc9HuXeFUQHYu
sYLQe1fgYbwtEqqTyxP4mh6dBO44j3U2MNNr9g96LnGsh9+7YucPYizVcwnGDxfl
XCKP3bwB6nsof+S9HIQ2kFLR2YNSKvp9QykV004jKRUTUGMpFdNgEykV7Xe8lIrp
sqmUihpu5kCl+y+0EYAHarEB4cfR9hMVtLII5RMVPtMjOyQjphSPcxSky7aUTEyn
IiFMPEdRLpK4HAWiFwl+pyLF2g2j1wIy0UXlQFTRKa08RceQAlwoetC9omMyAlwo
OmZKwIWiYxoHXCg6vjGAC0XHBxBwoej4OgMuFB1LB8BVosu3gkHioK8W9oVaXy0H
qkG+LwwSra92kysPfTV6C/jC9dUneOgBMChA0IrF3lX3heWtrz7RU1x9NUoK4IHf
kgQJ1W4d8Fj5efjuyn4qJd2K2HdXTio6ZIwExTTp5BiJ4uyzkC77MjCB7YX72cpX
3GcxXrzDhQp3eSgYAegVoo5a1EuLumhR/0wEnbOoZxZ1y6I+WdQhU73xUyT8i8S+
K5bMIVSkd9VGh9+eDiD/dtLGRV8H8BAbd5wVhg6BMHRGsXGhvxUOWwPke1MgBIML
lT7yT+8HhTO5HvThVvU3NL/K/nv9JtmMPuTGYP/J/blec/rUic3XXPWolP/mH9f8
eV4C11Ouz9/WPeFO+1/p4PzfLW8yLGUsl6dJ32XD365utyfB+X//64RXHrmLy/N/
87c/N3qAnP/6n/u0Xf8k55/52Clj31n+tJR/q2/7ldddxvWm701ac87z9e16Ps7/
9QVn15sg2sNofWvrqY/a/yoM5x+f/mDKk2O5XnDJN/PqNkt8U8r/zrZfv1x7DNfb
PTxi4boFL0fKfzA0rbGBhFYHwClCv1eed67XMQd8mF7HPiGBC/546XUaWlNNZ63X
UQGqQb5+hyuJXkfrdv4dF02vg7aUrd9XEKrXYSsAPKHTeT8Bv7KmQCeBO9ljraFn
egmodP1+kofrdVjPEWOprt8ZP1yU9XueqNdp4aH8kXoOhGZJqejsLaVU9PtWUiqm
ndZSKiagNlIqpsG2Uirar52UiumyvZSKGu4gpaLuOzpQ6eoOLQjggTpuSORaH/QB
Ecr7Ev4dQHZIRkwpHrsRpMsWrExMpyIhTNyNKBdJXMwA0YsEv1ORYq210acBmeji
EVtU0SmtPEXHgANcKDpmA8CFomOqAlwoOuZRwIWiY5IHXCg6vkCAC0XH5xFwoej4
dgMuFB0LC8CFomPVA7hKdPketxFxUFgJG16tsJID1SDf8AaJVli5yZWHwqqTh46e
cIVVZw89+QQFCFqx2Lvqhre8FVZdPMVVWKGkAB6Y6xoReuz/u8fKz8M3hqgrEdJd
lH1j6KS7QMZIUEyTTo6RKM4WEemyLwMT2F64P6x8xS0i48U7nFZYlfJdtdHht6cD
yL+dtHHR1wE8xMbFpx9h6BBBQjuj2LhcYWV+VJ0UVsGt6T8MqMt/6Pf8q1d/OmmO
XSHTNJvRv+x/V+MbZn4a4t8zY1XGOzPk/Lf8ft3BLms5f87kz6Yec5bdQDnnf+qx
R2udsJkrrL6duO7bA/XsChnO327hzp7ex7n8HR4Yfvfdfe0GtTn/kbrf/Xbf3fyH
ck/X237msUfZfzjG+Z8evXtll8lcAfXFL/5rznxWzj/64pVpC87lP2SbM+KC1a1v
sRvE5/xXvPLcnkNfcQPiG3+4pdOYHhuk/PsOXdfssrV7QvzXPDPB/8EndgPrTbO1
wqoqvnOFlTngwxRW9gkJXPDHS2HV2JhqkE/rVlpjpQJUg3wBD6eisbJrTrT7d5xd
Y8U6P57RFvArCNVY4SMNZBpujyeTdPHWYixmGnBdPdYiOt9rjjS6gD8FqRJKQSri
gglOdQHPVqRwURbweaLGCmtD8EfqaBCKVaEzFXnhk+VMNZf1UirmnR5SKmqgpwOV
LqRQVwAeKE1jItcNobZFKG8B+JSL7JCMmBKrZjuKs/BHumxtyMR0KhLCxIW/cpHE
dQMQvUjwOxUp1rLW3FmYIc6ii6dZUUWntPIU3dzwmCGuE91cKpohrhM9272iY8YC
XCg6plPAVaLL16lNDKHwlQ07dBYXrfrUWQ5Ug3zRGiT61NlNrjxOnXt56OgJP3Xu
7bGOYywErVjsXXXRilxYnCiL1ridOvfxFPfUGSUF8KhBMP3QsztkZubn4UtO1JUI
6frMvuR0OoBExkhQTJPOjpEozuIT6bJPAxPYXjiPl4aJi0/Gi30NXKhw2qwf/xSy
TR+4ROh39XfVwQC/PR1AvqignR5zAICH2OlzrTDxNF7s9IgrHpE52fU7/dOXrlk/
kv+9yn6eY3ecXfst851fYa2bzei9Ux/b4evHf+/w1vX579b9k9o1c+JvT2Y9ta+Q
p3/3c0MLN59Mj6ed+J85rfbzRWdx/oOtNpzuf5L+/VIn/l79v/Bs28CPs7svmPRB
7e7UbpoT/4VznvirQ5DLv/z79d6D91A7fU789Tw/pu+vyf8+55Bj1o28d5w8/dFv
jEq9bBdP/+C+Wmcdu02e/jcrt31+yfmc/59DE9NOvJL+3sSJ/+kFC/fXnMXl+e34
nbnpL8nrv2W7izIO9uL1k/b92P+75Tr691ed+PvP3by7/7s8/dWL73u0RXc5/9BL
RtV94zhu56524vFjFz4i53/z5V93triKy9O552/tn3qPqk+c+E9eU73r5ms5//5O
7426uZe8PkfOa9v/62H89zWXNV2xfOtq+nslJ/4GadsXPVSLp3/mHf5ZEw5T9YYT
/64Z3ab0a8/rZ36LcwKp6+T132BZxqJVz/H6OWXUHe3rfyPvz1d1+f3d/QlcnfNk
r7fu2vcx/T2RyK/t+ul3/V7Z3rcS/IE97EPoFztJ1KfZlxRgg188OWAIkuLr045n
i4XWWp+mAlSD/GgCDi0j06fZ9Tna/bvOrk8TEe1oYgWh+jQ2CjEqT/NUJ0s9fFmP
TgJ3msc6HpjpNUcfPZroi1QJP15g8Vgs1aMJxg8X5WgiT9Sn9fNQ/ki9FkJPl1LR
2c+QUlGK/g5Uup1BeQE8INHxRK4TQ42JUD6g4NMmskMyYkrxOJZAumyHxsR0KhLC
xGMJ5SKJizsgepHgdypSrM0legAgE108bI8qOqWVp+jonoALRcfYAVwoOgY24CrR
5auepo7aGWEJpLUzcqAa5EugINHaGTe58tDODPBYy5Aw7cxADz3tAAUIWrHYu+oS
qLy1M2d6iqudQUkBPHB9timhZ7l+b6R2BnUlQrpSsC9+nA6kkTESFNOks2MkirMM
Qrrs08AEtheuupeGicsgxot3uFDh9G8CSvau2ujw29MB5B9P2rjo6wAeYuNeaIWJ
WgixcelvAiAN/ao6/SigydTTjyJn8lP/Qe/nXf7o1fZTz0A2o+d2/OWrYRn8VPXp
EdN733vQfirM+Ud27X961yn8lH1j4IHBD1Wnl+qd+L8e8uvRh4bzU+GPx3/dL60f
tUrlxJ/4+Kv33NWZp98kp8ZfvQfSv8bixD/0zODi0Sv4pfqNvR/sPuYx+iMFJ37P
sCFvTd7M06/52fpne895UMq//YOFIw78zU+pmzQvGLXOQy/5O/F/0SOQefRizv/C
nA8/+E+EloPzH/9ynUFn3cDlaZztXTvvy8j20j8KqIrvwimmOeLDTjHtU1L8TjF7
3Iywk0nPQCOTi09p1UyrexSDQr5eARq3Jult+Xykj7kB6TGoh7k3MNIyf/qkkJYl
h5GW5TPSMp89LLlaxFGuFnGUKyuOcmXFUa6WcZSrZRzlahVHuVrFUa7WcZSrdRzl
ahNHudrEUa62cZSrbRzlahdHudrFUa72cZSrfRzl6hBHuTrEUa6OcZSrYxzl6hRH
uTrFUa7OcZSrcxzl6hJHubrEUa5T4ijXKXGRq6aZFv7GFS6fhZ+ntpiQM20aoQeq
XYyl3mIa2TwYwV+qxZOGVG2gGtiBaqZ5zHSyb0xKu7SMADtem218BWebdI95TuMn
XjLRegfuIVcSutXC+3nGrvwidlRD+LlRJDgN+fD28JntzMImGrm3sXIC1mZbHqH1
aEq1zAMBcMLVMf8esSd0agSsMA8UaZ+hxwciWI4Mi8PSqx16w/Mo8/LTsjuBR7rT
+AesJwN/TyX+ani+Z8af4TmWHGel0OiSjuMTG2/r/vr+3u3P+O3HKCk8Zfbf980U
8jwNSNBKIRyjsmXvLIUUM4WGxuhrTB4wxhT9PWGqUMNOAPXmM/buPjwvsp5AV09J
RMlTsse0AzyritixJsMjxv6Kngkynlh42Khnfiwrg1q6bJ4DYqcL7lXZ4WXAUy0v
sdSx81JPlx+1qKQLbnsZwK+Wl5hy7LzU0xXPmmOnC26xDKwcanmJiJ0XoJZu6foS
c2p5Vcy+BKfe5hWzLzFetbxExM4LUEu3dH0JvOptXjH7EnjV27wi9aXji64lWFGE
0w50/+qVZbOHt+vZHW907UFLTRlb0Z9nmdhs8ojwRs03HMid4WKzhMA15tpeiu6M
eq2V03zrucB6riInEboGyLI4I0DL1KoHZTjeqgimjmQIXw75q51jPnlFtBEqokl2
yGuBVYStdh1RoooIURUqAj3HCc4VcZz5xlFlKyIvYmicVW/36ivO7G92e7okjhwa
dGH/dsTQ8ChVAUWJKqLshkYDgQMI7xFPJRavR7CKUKmOElVE2fWIoPnGUWUroqH5
xjEqe5iJ5yRDI3pFlPkcUZyhYa8ABueKsGdbuh5R5hVRdj2isfnGUQUrom5oUYhi
Ao3Mw0VrkWz+wRRaoJt7NCbHcIoFkd4wdLlUONkkwSLcSEgmrZK2JrdK3xMYmvRH
cmr6mwF67FbLiHKAXG0V4HOyjNADJ8iKEDyRvt0dMPnLGqzW2DstYSAsvBaZHXYP
zg7nxTArhxOC2bTO/Ead7c2gdZYRoHWWEaB11qoEdYbDzrKHWDcA7TW4hEABSdiV
BEKye5xolmOGh/Y7dkmB3WY0OLLLqn695Dj/kkDvlCtr9PA/HwimnF9jlP+9gD+l
bw38zQqrfscWo349ZKyZQZnCXr+tQ9MHrUERrAbEfstotUhLs4QvGf0CKaw13Eyz
nO0sjpOKcAsNh7geDOgiK9iobwzv3rkFheOmT8gJNu+RNSzrhBYkSJAhFYaenFcn
O7JQzRAj2bxnkmWJmEgmEh+5gOBy224y3XieVKJmRkyafiT4MDrVmHqG+doGxhtT
T2tjCGHqwdNb6YZR3r8yjO5I/CZ5ftLCwMuJ1VImJOUGPkxskNI/6WxMUyUcRncY
giw04uP5jfGNmZ/Enwh/2QjPtZ7VjC/XhCT+RPiHRjjyx7OBEd4/iT8RHlm/dBhd
nVDSYXTsETqMmhs0p2EETYYH+9QiFvNkc9fad9qsGfk5BRNyMJRypxfmTC/ILbyk
wg8qL/nWH0yem9woxV+9d/Ko5MPJwernJvdI/j655I1uZlCmcG50oGSNvsBq9EWS
Rvebje4La3TjjVBtrb110wla96kOFaF1p6Z/lnpOxsL0RemHUztk5KY/mF4nrX7G
2YaIbRJo6yY2V2/dNgmJzc8xPhqfGR0Yz4VGOlPT+RPhHYzww9Yz1whblM6fCK9v
hNdJo0/I8WA6fyJc1ro3Jpe0dVdaX8aXiPOXEapFD44f1lrBRn1jfT2q9dDcwmk5
LcwL3MwObOTg9ZmiyRuZNlXZNXI6WeJbm7I67de0533fptyc9kHaPb5NKQ+n/WBU
ptdb/O+il0YoY9gbmTYRsJys8UJvTU+EmLYb9Xq94boZtIkG4SSLndEBlh7jex5+
h9J8a7hxXv5kOTPg9xFDvPwp5gEsNcKv8vIneoSI/xnhuV7+ND9UAgYYYbO9/Gnv
1A8aYfle/ozoN7gX4uVP+/HxOUb4/V7+DNroq43w/3j5s4mNnm5UyD1e/mxuo08x
wm/38id6roj1RvhSL3/aV1rHGkPpMchtPdlwBPBTqIuM8CeMcPbsJNCxEtpshP/X
y5/2+wQnGnPzT17+zLbRrzbCj0/gz942+nYjfG4Cf/az0TsZ/W97Au+HAwTa8iB6
g5e+9EDPKcm4Z73dCXxy35Q0K3Ctb1KNA0l3Bsb7etTw+54OnOE7oQa4rHGfzce9
CPuYhyORFVUGsI/70n66xZmDTuebCKZzT9jHGikNb2EuvZkBAnEiZ5M3HagJcfg6
81QjwRvwk9RZgSVpk2r8lXpnYHpajxqZaU8HhqdV9QZ812pAbxHjpQ3Yo6I1YHUy
3Hdfysi0S9Mv9b2Z0i5tePp436qUAWnT030u2pE2L7qZUPmwzMVqwzoBNUR65siL
HvttMfvdr1RjZZRoxlrkR0rhQBiOJL3GPDjbWBV5zCM/gz/Uo/3CbpjjhFCnuNv8
651oQawJaJcqCisFOLmdfieAzWRlPZJGsqbpCCApxmnv0yxjds6KcjgVQATSYtfQ
AKNSQhJZT9OxcKtcVvjabOqK8OxBo2SvNZzgF59IwEuaZ9Nx5a+WmEjH6Dlkgrck
Q0GsajuC2XWzi4pQjws8V5gD80S0GJJApVxJgr7oCcjCRYCF8a1YcT8pKioiH330
ERk7dqz5jufu3btNv5t4KiNkZVWpj4rGo6GhUfb4sSiR0I/xPpKdwD+92BfG/Dho
aGiEYR/Bz5fYrgJgo0j2pVP5GmoezaN53MvDv6340rJvq4xbJUXNo3mqGg8fRcZD
jyLNo3lKwMNHUSLR+zwNjZKAjyIoLPQo0tAoPvgowpU+PYo0NIoPPopwa0+PIg2N
4uPH7KLsq0I3X7jN1v+EfqBHT/TvN+98GgMu4uoJfc/uwTlwQUW86EIv3qzNHuzv
awSfc9G4aR2M5ye1CJl9/r47vpz+Yatab31Zu+kb2XetTntjw/ljv65/wmcDu3+c
/MjWE69vt+bRDz7+fMCza/JPnjLb/8YpM9cdN2N924m7PpqZl/nQeZ9+1LD9bSe+
tejIrmOPvPd07RdeW7N9Qs+NT3br+UPjY06dv+vi5ZNy1l95fh9/x8dfv7rD3x13
vnnRnTefsfb/evQ6ccPvDX58aMOW3aNX3vjT1P+cd+meTkvO/LZozrlTPjx+9j8L
Bsw7+64/X/8z6eDT/5w18IEBdcjGl7wLRrf7xdt01tSFfZ884Yufb/vm0Gl3HN48
tcX1jVYOq5v9+PjX6xzMvej95YE+FyV8Pm3sKd9/1uabvkVzdr/zzf/ufvux9Mn/
t/rH/cN/TNm39NO5t7Q9fHL90+bnNn9w/4Wzv+q26t5fun94xaaXVu1r3nb0tZcM
+HDm6Q/s8fc67YxhWdcOLczZfXaw676RNTKXtwq89sHXvoOvjLzUc9Pw++6865M6
O7fdtiR53n2/bl6Ztn7vqS+8/NyGG74L9O82++6Wq2v98cOeO9fPW3HHlE9u2X7e
1PcLX7rn0ICdzxy6/rOTprZsuezK83u0PG3Kfb/N+c4MrX/oi4SGl/26+Le/91Zr
2u2z8Vf8+NyXT99zU7tmvbd03Zx+6Fsy8qWrzn7/h3WPN7urZveD+95p0uGfPVPf
znu6+/TlO6/c3u3Dz1s8ueyeE869fXuve7POuu/gz5nnX/LhrnfeX5N8S+2dTd56
5KWV7zS7fk/PvW/PHZO76/X3t6fcNnXt3JELNp333m/Nutec/9ezg09MfP+XOxY8
eMfh11aO/u6P7x6fdP71A0clP/jOE1eOGn3/wHV3Dzm6+uJDNZb/8JWx72j08jk5
0yfWtGzaJRAHm3ZttE07JWSjGlBHALVpd6JvdEqbtJRAglVHdpt2AVLRbdphZ8ps
2gU5Gwm3aSdSAJYjg8ymHdYaJbNpd7UZfy/JIi2tFE66b3725V++0f2Buid+sf7g
7igpUBsD15gp/EhaG3VSMpt2mWYKbY3VUnuiZj8OwJyuatNOHbFSkstkj2kHeLRN
O4rYeamnyy6gArHTBbe9DOBXy0tMOXZe6umKPTR2uuC221ID1PISETsvQC3d0vUl
5tTyqph9CU69zStmX2K8anmJiJ0XoJZu6foSeNXbvGL2JfCqt3lF6kvUFs1eG63K
2rSzs1dZU24tzTeOKlsRP5pvHFXWpl1rgQMonb0qF5tya2O+cVTZimhrvnFUWZt2
4k/BgdL1iDKviLLrEe3NN44qWBHUph2OO1BMoKxs2mUlbUnOSv8uMDjpl+Tk9HUB
euwWCGibdnZwY1xZSbsyaJ2lBGidpQRonbnnp89qxrj2Wv0OPRHA0+Io0U/LVerX
S+r57wn0TFlUo7t/faB+ytQaI/yfBXwpg6uUTbtNMWza4RDX5TbtuhpTzxBfy8BY
Y+ppaQwhTD14Vj6bdj/+K8PojsSvkucnXRd4OTEhZUJSTuDDxHop/ZMGYpoq4TCC
LbvrAtSm3VfJ1JYdeyIctuxyrGdCCrVlx54Ihy075I9nvRRqy449ER5Zv2Vt0w6a
jEpl0+5r/zHJc5KPTfFVPzV5RPLvyfWrD0/unrwjueSNbmZQpnBudKBkjX5lDJt2
AbPRfWGNbrwRqq21t2460Tbt3GTTDqpFV9u08/l2ZZxpfBexrISr6TuY0dPX2KgR
d9q0gw0z1GMDwk6F5ECJGJBeuE0xxC5JvUeDaFNsduBaX26NA0l3B8b7etfw+1YH
zvCdXMVNUm0mLrIpNjuwJC23xl+pdwemp/WukZm2OjA8rao34BarAb1FjLfC2hQb
6muXOjxtdsZs38jUNmlDM8b6slPPSJuW4T6bYpipgqh005mSe2BT7IWI2zr2uzfl
Z1MM3Yt2qaKwUoAz7jbF2NbH3qdZxuycC+VwKoAI8RoQUL42xdonMJtiBz0lGQpi
VduhbYqVgqcyQlZWlfqoaDwaGhplD21TTEMjftA2xTSP5tE84Tzappjm0Tyl5dE2
xTSP5iktj7YppqFRWmibYhoapYW2KaahUVpom2IaGqWFtimmbYq52aZYEnGwKdZO
2xRTQjaqAXUEUJtiLX0TUzqm1QokWXVktylWj1R0m2KQktkUG8jZSLhNMZECsBwZ
ZDbFMNuVzKbYR2b8mZ7BZIiVwp5NqbWue+rZ7q2XThm9aMgPUVKgv/HeaqaQ7xlG
hpfQplh9M4URZCQZRdTsdwHgUbUpFj0lESVPyR7TDvBom2IUsfNST5ddQAVipwtu
exnAr5aXmHLsvNTThTQMsdMFt92WFaCWl4jYeQFq6ZauLzGnllfF7Etw6m1eMfsS
41XLS0TsvAC1dEvXl8Cr3uYVsy+BV73NK1JforZAZorVSqqwTbHBAgdQZU1pDTHf
OKpsReRHDI0qalNsmMABlM5ekItNaQ033ziqbEWMMN84qqxNsZHmG0fpekSZV0TZ
9YhR5htHFawIalMMUVBMoKxsirVN+iy5bfpPgRFJh5Mz0t8J0GO3owPappgd3BhS
26QDGbTOagVondUK0Dpzz0+f1YwhzfT8G8aQgv77A6el3Fqjt39joHFKXo1z/TsC
KSkjtU0xE9RSAA5xXW5TrIcx9Yz0dQrkGFNPO2MIYerBs/LZFMv/V4bRHYm7k+cn
LQm8nJiaMiFpeuDDxCYp/ZOGY5oq4TCCLbElAWpTbLdlS4w9EQ5bYtOtZ2oKtSXG
ngiHLTHkj2eTFGpLjD0RHlm/ZW1TDJqMSmVTbJc/mFyU3CglpXrv5HOTDyc3rn5u
cu/k75NL3uhmBmUK50YHStbosWyK1TMb3RfW6D5waZtilcCmGFSLrrYpluI7kDHE
+C5iWQl3lO/vjNN8Jxs14l6bYkcZbgCJvLNjB0rEgPTCbYohdknqPRr44Hon6drA
1b6LavyU9GhgrG9wDZ9vfaCfr0sN1GPxTVIZLlvkKRvY6720U6fYcnQ4fUCcbYr1
rGgmqbzGfHVt4Na0i2ocTn00kJc2uEadtPWBkWlVvQE/lDRgBbQpNsqXnDo6bXfG
XF9Wase0NzJyfHVSz0r7woU2xTBTDSSRNsUGRdzWsd+9KT+bYpiTaZcqCisFOONu
U4wlZ+/TLGN2zoVyOBVABNL692yK3R2yKbZa2xSrSDyVEbKyqtRHRePR0NAoe2ib
Yhoa8YO2KaZ5NI/mCefRNsU0j+YpLY+2KaZ5NE9pebRNMQ2N0kLbFNPQKC20TTEN
jdJC2xTT0CgttE0xbVPMzTbFqhn9rzax2RTrZN5SLyDaqFgMZKMaUEcANSp2om90
Spu0lEA1q47sRsUak4puVAzty4yKLeRsJNyomEgBWI4MMqNimBZLZlTskBm/wDOR
5FgpTPy4c/1F32/s/sqLhfOGHtojTYH9yPsXM4VCz2QypYRGxZqaKeSSqeQCombA
C4D4akbFioPoKUWTyR7TDvBoo2IUsfNST5fdQAVipwtuexnAr5aXmHLsvNTThTQM
sdMFt92YFaCWl4jYeQFq6ZauLzGnllfF7Etw6m1eMfsS41XLS0TsvAC1dEvXl8Cr
3uYVsy+BV73NK1JfosZACsRqJVXYqNhEgQOosra0csw3jipbEYURQ6OKGhWbLHAA
pTMY5GJbWlPMN44qWxG55htHlTUqNtV84yhdjyjziii7HnGB+cZRBSuCGhVDKIoJ
lJVRsaykLclZ6d8FBif9kpycvi5Aj90CAW1UzA5uDSkraVcGrbOUAK2zlACtM/f8
9lnNGlKB59+whlTPvyTQM+XKGt39zwfqp5xfY4T/vYAvpW+VMiq2NoZRMRziutyo
WFdj6hniaxkYa0w9LY0hhKkHz8pnVKzwXxlGixO/Sr4i6brAc4kJKecl5QTeTayX
0idpIKapEg4jaK+uC1At1lfGN+aKJP5E+HNGeI71TDC+XOcl8SfC3zXCkT+e9Yzw
Pkn8ifDI+i2tUbE6MYyKQZNRqYyKfe0/JnlO8rEpvuqnJo9I/j25fvXhyd2TdxiN
1LoEjd7alXNnLKNijc1G94U1uvFGqLrW3rrpBK2rjYq5xagYVIuuNirm8+3KONP4
LmJZCVfTdzCjp6+xUSPuNSqGurqR2LcpkUCJGJBeuFExxC5JvUeDilExwtYjxbBJ
ZSA7xFBmsNd7aadOseXocPqYONukcpVRsarcgJ9IGrACGhUb6ktPHZ42OGO2r01q
m7SsjLG+Y1LPSOvrQqNimKkWkkijYl9G3Nax370pP6NicLRLFYWVApxxNypmaf8i
+jTLmJ1zoRxOBRAhXgMCyteo2OMho2K1vSUZCmJV26GNipWCpzJCVlaV+qhoPBoa
GmUPbVRMQyN+0EbFNI/m0TzhPNqomObRPKXl0UbFNI/mKS2PNiqmoVFaaKNiGhql
hTYqpqFRWmijYhoapYU2KqaNirnZqFh1418dYjMq1rpDTKtiGiaycckJdQRQq2JZ
vjEpHdIyAtWtG1B2q2LZpKJbFYMszKoYbkIyhFsVEykAy5FBZlWsCSmpVbFfzfiz
PJeSOVYKD4zZ3LzXuC3db79o7fyznv5BmgL7lfdvZgoXeeaSy0toVayXmcI8UkSu
IGoWvADM8dqqmAxq6Yr3+mOnC267RS481fISSx07L/V02RVUIHa64LaXAfxqeYkp
x85LPV1IwxA7XXDbrVkBanmJiJ0XoJZu6foSc2p5Vcy+BKfe5hWzLzFetbxExM4L
UEu3dH0JvOptXjH7EnjV27wi9SVqDWSWWK2kClsVu1TgAKqsMa055htHla2IiyKG
RhW1KjZX4ABKZzHIxca0LjffOKpsRcwz3ziqrFWxIvONo3Q9oswroux6xBXmG0cV
rAhqVQzHHSgmUFZWxdokbU1uk74nMDzpj+T09DcD9NitVkBbFbODm0Nqk7Q3g9ZZ
RoDWWUaA1pl7fvysZg5pluffMIfUwH9/oG/KrTV6+TcGGqXk1Rjt3xFIThlZpayK
bYphVQyHuC63KpZtTD0jfG0DE42pp60xhDD14Fn5rIpd9K8MozsSv0men7Qw8HJi
tZQJSbmBDxMbpPRPOhvTVAmH0R2GIAuN+Hh+Y3xj5ifxJ8JfNsJzrWc148s1IYk/
Ef6hEY788WxghPdP4k+ER9Zvaa2KHRvDqhg0GZXKqtgGfzD5nuRGKT/4eydfmnw4
2Vv93OTxyd8nl7zRzQzKFM6NDpSs0RfEsCqWbTZ6tbBGxwrM0tfamzedoHm1WTG3
mBWDbtHVZsWSfXszBhsfRqwr4er4fsvo62tm1Ih7zYq1IbjWQ9XW0YASMSC9cLNi
iF2Seo8GbVYMkFul2kacrVJps2JxQdk34KeSBqyAZsVG+n5LOSftz/TLfPVSO6R9
nD7Rl5B6ZtpP6e4zK4aZahmJNCvW2WO/rmO/fFN+ZsUwJ9MuVRRWCnDG3awYE8re
p1nG7KAL5XAqgAjxHhBQvmbF3gmZFWuozYpVJJ7KCFlZVeqjovFoaGiUPbRZMQ2N
+EGbFdM8mkfzhPNos2KaR/OUlkebFdM8mqe0PNqsmIZGaaHNimlolBbarJiGRmmh
zYppaJQW4WbFbjcvVhByh3kTEZhM6L2K/gbL5x78qoJfJgUw9nBHasiMC3OCOfn5
M/KD48flFwQnjJverDA4PidYMGXGxdOzgiOmXNJdiFYiHGFCLTVvbeHOiYc0sS5n
ASebl4pURGlhXu3xSi92JZAgse6lWBepaAi/8DWFDCIXkIlkmrEUvsW8xVIcLM1+
sQjPF7P3mCna7wXdnq0tvGkLb+6y8JZCHCy8tW0T08IbUxlWcWTjvhnqCKAW3k70
jU5pk5YSSLEuo9ktvA0iFd3CG+ZpZuHtUc5Gwi28iRSA5cggs/B2PCmphbcED+Jf
7LmRLLRSWFKQNfDqP7Z237XVM27h7L3SFNgv7hPNFGZ7biI3l9DC2xCzDIvJEuP7
oWZNDcAtUG3hTQa1dEtnSQnAUy0vsdSx81JPl90GBmKnC257GcCvlpeYcuy81NOF
NAyx0wW33bIYoJaXiNh5AWrplq4vMaeWV8XsS3DqbV4x+xLjVctLROy8ALV0S9eX
wKve5hWzL4FXvc0rUl+illkuFquVVGELbzcKHECVNWy20HzjqLIVMTtiaFRRC283
CRxA6aw3udiwmf23e1W2IhabbxxV1sLbEvONo3Q9oswroux6xC3mG0cVrAhq4Q1F
hAPKysJbVtKW5Kz07wKDk35JTk5fF6DHboGAtvBmBzdNlZW0K4PW2f+zdybwUVNb
A79pJ9NpwkyntGVpQSoqPNCylEVEoMNSfKzKVvBjEcEiVHYRC8ij4ENAHyoioiIo
iOKCD0QQENyQRUV2RVT2RYSCPFnqTr85yaTJZJbcTmaYzMz5/15eJunJvXPPvUlL
cvOXt4s54+1iziLnPXQ6NdXDTDjUVBmWRfY2/JPJOZZN9uv4guTelu/tZr47Gt4E
RG0D3MSNcMNbC+elp4e5vn2g89JT33kKwaUH1tFneCsMy2k033SEm8HOsm8wxfOD
2Xz7PlMG34ntApepAE8jMLvNsouGtyOcaHaT1rAfzG75rnU8L5rdpDXsB7Mb1A/r
DF40u0lr2O+Z31Ab3uBJRlQZ3jZZ0rkXuWr8j5ZW3HjuN+6qJY8bwB3lAu90oYKQ
4r3TgcA6fZqG4e0u4t3w5npeq+5eG4HuRcNbpBje4NliRBvezObTSV2dvxjh70pY
KpovJbUx3+DMSOQa3hoRyIn42Nof0CIJKM/d8AZHB5J3f6DhDfAtCPueeBeEoeEt
KIS+A3/w0YEGNLz1NP/I51kX2QrNXIVs60TbQPNFvqP1mQg0vMGV6i3iaXib42F4
U0++uXaGN7gmi0OqyK0VEBl0w5t0I0s9pqWKpZ9DO7w1QAnEhs/wdqXM8LYKDW9G
iolGfLWVJh9Gi0EQJPSg4Q1Bggca3jAGYzDGPQYNbxiDMXpj0PCGMRijNwYNbwii
FzS8IYhe0PCGIHpBwxuC6MWb4Y1xGd7g3LqfiJNJ0PAm7EHDGxre0PDm3fBmJV4M
b00baBre1GM/RnHAfDPIEeBueLO6JqOpDW99iNENbzCXUTK8bZTDiLvhTfkTQKpR
wpfhDV5TCMzwVpGB4ycwi8jLrhLqrMsZ0+bX/TlVNr9gzb2obXhLEUqYyCwmSwI0
vPUV2vCq83r+GqGzqQHwwgga3nxBV64+kxIAa7q6lK3Wrou+XGk2MKBdLkSr2wDx
dHUpS9aui75c+DYS2uVCtNosBtDVpUS7LoCuXH1jSVro6jLmWIKFvs+NOZakWLq6
lGjXBdCVq28sQSx9nxtzLEEsfZ8baSyJZpYJyrSSGDa8LVJEADErNntZ2JKJ2URM
9Dg1YtTwtlgRAeizN0Ww2GyJsCUTs4l4VdiSiVnD21JhS0bfiAh5IkI3Il4TtmRi
MBGi4Q1ud0AzATS8yUhZk7bR8KaNMjcAnZpqAhMONRUa3rQNb3ATFw1visXIp9HE
sJxGaHjTNrzBkww0vPntdKGCkOK904HAOl3L8NaHeDe8uZ7XqrvXRtDwFkmGN3i2
iIa3ssUYhjfoog1EfGztD2iRBJTnbniDowPJuz/Q8Ab4FoQdJN4FYWh4Cwqh78BD
PjrQkIa3b/g86wRbofl3PtvayzbQfIzvaB0RgYY3uFJtJJ6Gt/c9DG/qyTfXzvAG
12RxSBW5tQIig254E/4UIMExvCnnAQHX1vBmNkmGty5oeDNSTDTiq600+TBaDIIg
oQcNbwgSPNDwhjEYgzHuMWh4wxiM0RuDhjeMwRi9MWh4QxC9oOENQfSChjcE0Qsa
3hBEL94Mb3Euwxt8vp+Ik0nQ8CbsQcMbGt7Q8Obd8JbkHH9wXroZ3hoNHT2E+La7
0UzGigEckAbIEeBud0ty5UhtdxtIjG53A9ufZHfbLocRd7ub8ieAVKOEL7tbbRKo
3S2VgeMnMSvJu64SWt2ZOzXj74M5p99ofPtjh875KUF82z5NKOER5j2yOkC722Ch
DWvI+2QtoTOpAfD6Ip3dTaskJYGXpD5SDcSg3U1Euy76cqWZwIB2uRCtbgPE09Wl
LFm7Lvpy4dtIaJcL0WqrGEBXlxLtugC6cvWNJWmhq8uYYwkW+j435liSYunqUqJd
F0BXrr6xBLH0fW7MsQSx9H1upLEkWlkmKdNKYtjutlIRAcSs1OxdYUsmZhPxiMep
EaN2t/cUEYA+c1MES81WC1syMZuINcKWTMza3d4XtmT0jYiQJyJ0I2KtsCUTg4kQ
7W5wuwOaCaDdTUbKmrSNdjdtlLkB6LRUk5hwaKnQ7qZtd4ObuGh3UyxGPo0eCctp
NMd0hJvKzrKvMcXz/dl8+w5TBp+ry+4GT6/A4gZrsLpNZeU17F9jEi1usAarW39W
XsP+HSbR4gZrsLrlsvI6NHa3Shp2N3iSEVV2tx8s6dxUrhpfamnF9ed+4yon5nG5
aHdzRYidPpBAp5vdOt25RRplDh09JFPduzaCcrdIkrvBo0WUu5UtxpC7NXEuXxLx
qbU/oEUSUJ673A2ODiTv/kC5G+DbDXaYeHeDodwtKIS+A4/46EBDyt0W83nWarZC
8xY+2/qbdaD5Hb6j1R6Bcje4Um0nnnK3lDj1bB313JtrJ3eDa7I4pIrcWgGRQZe7
Sbee1GNaqli6zwXt8NYAJcppQMC1lbullsndXkG5m5FiohFfbaXJh9FiEAQJPSh3
Q5DggXI3jMEYjHGPQbkbxmCM3hiUu2EMxuiNQbkbgugF5W4IoheUuyGIXlDuhiB6
cZe7oVEMjWKRZRRLJl6MYo3RKEaBA9IAOQLcjWLJrhypjWJjidGNYjDZTDKK7ZfD
iLtRTPkTQKpRwpdRDIyQgRnFHheO/4VsJ1+5Srjr3B+N7917MKfnlXG/Vnq42GcJ
0hveTwglXCQ7ya4AjWIPCSXsJnvIXkJn7wJgbjCdUaw8+C/J33dSH6kGYtAoJqJd
F3250vRTQLtciFa3AeLp6lKWrF0XfbnwbSS0y4VotckKoKtLiXZdAF25+saStNDV
ZcyxBAt9nxtzLEmxdHUp0a4LoCtX31iCWPo+N+ZYglj6PjfSWBJNIL+ofhazRrHt
igggZkVaXwlbMjGbiIvClkzMGsV2KiIAfbagCBZp7RK2ZGI2EbuFLZmYNYrtEbZk
9I2IkCcidCNir7AlE4OJEI1icLsDmgmgUUxGypq0jUYxbZS5AehUSL+4xh08SgFg
7YoI6MVymvyiUQxaqGUUg5u4aBRTLEY+jS6G5TRCo5i2UQyeZESVUazYks6N5arx
SYmtuK7cb1ztxDyuKRrFXBFip48VOp1163T486wxGMXUnWsjKBSLJKEYPFlEoVjZ
YgyhmMO5fEPEh9b+gBZJQHnuQjE4OpC8+wOFYoBvH9VR4t1HhUKxoBD6DjzmowMN
KRTbz+dZa9gKzX/w2dY/rQPNx/mO1pQIFIrBlWo/8RSK2T2EYuqpN9dOKOYg0pAq
cmsFRAZdKCachCQ4QjHlLCDg2grFPoiXhGLPolDMSDHRiK+20uTDaDEIgoQeFIoh
SPBAoRjGYAzGuMegUAxjMEZvDArFMAZj9MagUAxB9IJCMQTRCwrFEEQvKBRDEL2g
UAyFYpEsFEshXoRiTfwLxWCMIt6EYvXM9/BNrUn2FNfsJ7VQbCIxulAM5mtKQrEL
chhxF4opfwJINUr4Eoo1IoEKxRowcPxk5hA57CphwdJXb8o7dyBn6QNJs+f1Pe+n
BPEF74ZCCf9ijpJjAQrFJgttOE5OkJOETt4FpBBaoZhWSUoCL0l9pBqIQaGYiHZd
9OVK008B7XIhWt0GiKerS1mydl305cK3kdAuF6LVIiuAri4l2nUBdOXqG0vSQleX
MccSLPR9bsyxJMXS1aVEuy6Arlx9Ywli6fvcmGMJYun73EhjSRSBTFamlcSwUOyQ
IgKIWY/WYWFLJmYT8S+PUyNGhWJH5QABfbKgCPZoHRO2ZGI2EceFLZmYFYqdELZk
9I2IkCcidCPipLAlE4OJEIVicLsDmgmESiiWzX7DZdvO2PPY3zmbbYtdvO2Wakeh
mBrZhJTNFieJOUuyizlLsos5i5wXn+lMSJOZcJiQaliW2tvzzya3tXxur8mPTu5r
OWrn+D4oFBMQPQFwEzfChWIO56Wnt7mR/T7npaeR8xSCSw+so08o9q+wnEbzTSe4
Gexs+wZTAj+YHWbfZ6rBd2K7wWUqwNNovvOLzHYeD+sTzt8xM1h5Dfs3OPcPc60T
nL+5BrPyGvbvc+6H+mFdw7m/EyuvYb9nfvUKxappCMXgSUZUCcUuWDK58VxNPiWx
Hdedu8rdnNiPa879yAXe6UIFIcV7pwOBdfpMDaHYROJdKNYEhWKRLxSDJ4sRLRTj
zMVJ3Z2/FuGvSlgqmX9Nam+u7cxI5ArFWjuXn4n40Nof0CIJKM9dKAZHB5J3f8g6
oz7mJfz/WYfbHjFvdf4L6J+2+8z/5btaB0agzgjydIF46oy2MeqpAuoH/7LOaA6Z
JxVaBuyDf48GQ2cEI0I8E4rcWgGRQdcZwT+kAfX1RqpY+kc2tMNbA5Qo5yAAzqSU
fSPXWlik/a52ufZ/4hCXIlhDDpw4PiHUOqOWJklnVMwEciooU61G/j2Dbj1ArWY7
Tryr2dCtFxRC34EnfHSggdx6KBQLOCYa8dVWmnwYLQZBkNCDQjEECR4oFMMYjMEY
9xgUimEMxuiNQaEYxmCM3hgUiiGIXlAohiB6QaEYgugFhWIIohd3odhzwsSKeDKf
vCCsCbmfiNO5OjlDfnCebCVEnkwKwLkHE0N6jBqRn5k/duyosZmD7h37YObge0fW
Hpc5KD/zwaGjHh5ZL7P30Ak5isMCohS+FPC8MFUFZn0x5EZFwC3CFs1XyRLmncT5
nM0SRzKJa16KayqjPL9lKLlLmOMC81vmCuWIfN6m7CN5RfFZolJb+P/nHeuLYL3e
cUYoUT0n7zlHqK1ureNEq1vDONnqtmNkSkP7tmWrR5O38goWL8mqXzRxxerjzyR1
79WxXbu63bruqTWm79z86hOy/lnI2yYvuW5i8YL/Vbi31oBRh/pfqMX2fHrVnJor
cq42OnHkPymjit+u0cJcVDyi6I+nu+z/5fd1k3tWvfRG3zl7X/56TGv+4ztHDxqc
9krFXy4ccGxJL+3w99fNqrY0jRi3vcr5lQ/u6jF8+R817XufH/DpmSbPT349q5Lt
7P0tlpbkNJmXfXdcUT5rX3vf2ZvqFXybPvvnOZfvqLzo24xFM+KXrTkzjmufy2yu
22roxafzdx3su/u+Gt0WWIfvO9x3yEFu9IJ+bJvJJ88uySp8o9rpDVX/rHn7+PFJ
Y7e+vO3EyQbWLSUfTr208OErv364a/mKVSMfWPD9V422t3jtzI7Hu+57gFv4j17T
qzX4rtvcouuP3b1tVpXOm+7668uZGS0sg85UbdV8+viRJdU3zVmROvdYv/OL2mZ0
+ejyv394p9GAujP6pB8d/O7ubieT7txV6ar5w3YbXrp8dWnJ8GXbO+yqdHj+gLsn
5Z8/ldtj781nTlmqXx553UuLsjbW/3DKHxtmtNlY8mnCL+f//XZRkwlLP8iact/+
lB0Nh764YevUu6td3+njnHPNWx64crL73iZH3uk8qFHv3nc8tjZve4X6i44tO3Db
3+1WVD9zcMCW2jd9l5x1ceNb9d8etPyFnWsWbXxw2IiGf5071O/tP2punv3GwfN/
FW3ffOyJDd1rvfb5lfkzh9QfsHbJ9IsbH+zd49lBfZ+b9uZ7b9+7/8dhPRrwdW+4
vvvozl9+PGf6Ux06XBi1u9M3x+tnmdyFbmnEi9CtqX+hmzS8YxwHTDCDHAGi0K2u
uS+fbeXtaa7ZZ2qh27PE6EI3uPxIQjeTfChxF7opfwJINUr4ErrBb57AhG7ZDBw/
hWGYOEYs4eiHr2z4c+73Obfltc8d/LC20K2RUEIRY2JYVwnuaAvd5ov/5mMSGAtD
J08D0ggK3XxDV64+cRIAa7q6lK3Wrou+XGkCPqBdLkSr2wDxdHUpS9aui75c+DYS
2uVCtFokBtDVpUS7LoCuXH1jSVro6jLmWIKFvs+NOZakWLq6lGjXBdCVq28sQSx9
nxtzLEEsfZ8baSyJIpYpyrSSGBa6CX8dKYhZj1kcJkJMRJHHqRGjQjf1v3b0yZoi
2GPGYiLERJg9EhGjQrcEj0Qot8o7IkKeiNCNCAsmQhS6we0OaCYQKqFbPXYPV892
yt6dvcJxtk/t4m03ux2FbmpkE1U99nSSmDPeLuaMt4s5ixz1A52JagoTDhNVhmWR
vQ3/ZHKOZZP9Or4gubfle7uZ745CNwHx5XS4iRvhQrcWzktPD3N9+0Dnpae+8xSC
Sw+so0/oVhSW02iO6Qg3lZ1lX2OK5/uz+fYdpgw+l+0Cl6kATyN4ejXLLj7FOuL8
HTOVldewf41zf75rHe/8zdWfldewf4dzP9QP6wzn/lxWXsN+z/zqFbpV0hC6wZOM
qBK6FVvSubFcNT4psRXXlfuNq52YxzXljnKBd7pQQUjx3ulAYJ0+TUPo9izxLnRr
ikK3yBe6wZPFiBa6mc2nk7o6fy3CX5WwVDRfSmpjvsGZkcgVurVxLvGM+3Qpb0CL
JKA8d6EbHB1I3v2BFivAtwTpJPEuQUKLVVAIfQee8tGBBrJYSUrFnuZX+DxrB1uh
eTOfbb3JNtC8nO9obRmBSkW4UpkYT6Xijx5KRfXUG1mp+KQFSnIH9sEdoWAoFeGa
LA6pIrdWQGTQlYpwKwtQj2mpYuk2F7TDWwOUKGcBAc6klH0j11pYpP2udrn2f+IQ
lyJYtxYPcXxCqJWKtjKlYqO4QE4FZarVoNBNR0w04qutNPkwWgyCIKEHhW4IEjxQ
6IYxGIMx7jEodMMYjNEbg0I3jMEYvTEodEMQvaDQDUH0gkI3BNELCt0QRC/ehG4m
l9AN9oLQDSaTGFjoFl8WUB6hWzaB25LisZ4Tu+JJJnHNS3FNpBL3qLVu95Hhzj+F
lVo3OsKvdWsfJ2rdmsbJWrdDI/c1SN12KK3WZseC1dbNWwcMPH5dne+75Ozn3vym
7uON1721d/8Pnd9bN/aWoYWWzbeP+bT6qE2N7jv99ZjRKcv6f/f19U3m1d32ZOnp
aqU7301b+/G6w4PbfL6iZZuzN6S3mnH64YVD8jdNG5BruXX5Z/9u+tetx7aMf+Hp
jp981Lpt3a2/1Ti3bOuen/ou+c/PBa/2n3im2TNdTxZN6jd0302Ff8/sPKXbgj8+
+4O99O7fd3Z5rXMl8vkHcTP7Nr4SV+uhgtntV9Q5+Mu8E5fvmH91d0HW4zWX9Kri
WD7os0qXho3ftdCeOz7+h+EDb//x++wT7Ysm/fTliYsvffG27f6PVp+7kHeOP//8
d5PnNrp6y3V3zBj2j9cvjCg80vKdl6/k7Jv61QfvnP9Ho76PTei8b0yH185Y2t7R
sVe9x3qOy/+pW2aL832SUxY2sH+897j50sY+E5mn8ha/sODbSscOzHuGm7K4ZPcS
66biVms3rNn6xCl7p5aFL9Vfnfr72TMvbJryyvyh38493L9g17gPFl3ufGzV5ce/
v7mgfv0Xpw1oXf+OoYt/nXRK2Hvd5YPx1z9SMufXv4oTarX8ftDUc2sOvbvoqca1
2+1psdt2+STp88Gj3Xad/XR57QUVcy6d//LGpn+fKfhi9Ls5Ixcem3a45b4fsla8
uKhOv+cOt3253p2LL/2SMmDCvtNf7lrHzU07duO2Nz9Y8mXtx8+0Kf5i8j3DTn+2
6zA/r+CTyX1mftV/56+1cyrO+PO97nVNu67Mn/n6/KsfL+l76vdTy4cMeLzL3dzr
X/532t19l3b59KUeVRPnXE5eePaIc9y7u90qEy9ut1v9u938TaGLIRww1wxyBLi7
3Sq7JqKp3W6LiNHdbjBhVXK7ZciHEne3m/IngFSjhC+3WxMSqNutMQPHT2XSmEou
M9uQyk/9dv+Ir3Peb7SSaXis2E8J4rv2TYQSpjFVmKoBut0WC21IZzKYauVwu1Um
6HbzDV25+hxKAKzp6lK2Wrsu+nKlmcCAdrkQrW4DxNPVpSxZuy76cuHbSGiXC9Fq
pxhAV5cS7boAunL1jSVpoavLmGMJFvo+N+ZYkmLp6lKiXRdAV66+sQSx9H1uzLEE
sfR9bqSxJDpZpirTSmLY7ZamSkTMKs0qYSLEREzzODVi1O1Wxe+IKK+3KYKVZlUx
EWIi0j0SEaNuN/WNAH0jIuSJCN2IqIaJEN1ucLsDmgmg201Gypq0jW43bZS5Aeik
VFOZcEip0O2m7XaDm7jodlMsRj6NpoXlNEK3m7bbDZ5koNvNb6cLFYQU750OBNbp
Wm63RcS72+1WdLtFvtsNniyi261sMYbbrS0R/6EPD639AS2SgPLc3W5wdCB59we6
3QDfarAfiXc1GLrdgkLoO/C0jw40pNttG59n3WgrNBfz2dbnbQPN+/iO1pUR6HaD
K1UG4+l2e9DD7aaeenPt3G5wTRaHVJFbKyAy6G43uJUFqMe0VLF0mwva4a0BSpSz
gIBr63a7GC+53V5nAjkVlKlWg243HTHRiK+20uTDaDEIgoQedLshSPBAtxvGYAzG
uMeg2w1jMEZvDLrdMAZj9Mag2w1B9IJuNwTRC7rdEEQv6HZDEL14c7uxLrcb/I0H
bjeYTIJuN2EPut3Q7YZuN+9ut6rEi9utmX+3G/wBjPhzu1V1TURTu93eIEZ3u2US
2e1WVz6UuLvdlD8BpBolfLndmhJ3t9t6168XbbfbcuH4hkwdpq7LzFavaZvPFp47
kLN7SL31DXee9VmC9K79O0IJ2cwtTFaAbre3hRLqMfWZBuVwu1UltG638uC/JH/f
SX2kGohBt5uIdl305UozgQHtciFa3QaIp6tLWbJ2XfTlwreR0C4XotVOMYCuLiXa
dQF05eobS9JCV5cxxxIs9H1uzLEkxdLVpUS7LoCuXH1jCWLp+9yYYwli6fvcSGNJ
dLLASyNKYtbtVkeViJhVmqn/to3ZRGR7nBox6na7xe+IKK+3KYKVZlmYCDER9TwS
EaNut/oeiVBulXdEhDwRoRsRDTARotsNbndAMwF0u8lIWZO20e2mjTI3AJ2UqiET
DikVut203W5wExfdborFyKdRdlhOI3S7abvd4EkGut38drpQQUjx3ulAYJ2u5XZ7
Q+h01q3T4c+zZuh2i3y3GzxZRLdb2WIMt1s7It4VhYfW/oAWSUB57m43ODqQvPsD
3W6AbzXYT8S7GgzdbkEh9B14xkcHGtDt9l/zBT7POtS215xSIdvazvaB+U++o7Vf
BLrd4EpVl1G73fqUbnO53dbniNH/y1FPvbl2bje4JotDqsitFRAZdLcb3MoC3G9T
yemTbnNBO7w1QIlyFhBwbd1ue11ut9XOX62BnArKVKtBt5uOmGjEV1tp8mG0GARB
Qg+63RAkeKDbDWMwBmPcY9DthjEYozcG3W4YgzF6Y9DthiB6QbcbgugF3W4Iohd0
uyGIXry53cwutxv8dgK3G0wmQbebsAfdbuh2Q7ebd7dbBvHidrvNv9uNZjJWDOCA
NECOAHe3W4YrR2q32ypidLdbTSK73ZrLhxJ3t5vyJ4BUo4Qvt9utJFC32/vC8blM
S6aVy8yWXnh+Z5WvvslZ8/CsCsdf0na7rRVKaM84mNYBut3WCCW0Ydoy7crhdssg
6HbzDV25+hxKAKzp6lK2Wrsu+nKlmcCAdrkQrW4DxNPVpSxZuy76cuHbSGiXC9Fq
pxhAV5cS7boAunL1jSVpoavLmGMJFvo+N+ZYkmLp6lKiXRdAV66+sQSx9H1uzLEE
sfR9bqSxJDpZcpVpJTHsdmupSkTMKs1aYSLERLT3ODVi1O3m8DsiyuttimClWWtM
hJiINh6JiFG3W1uPRCi3yjsiQp6I0I2IdpgI0e0GtzugmQC63WSkrEnb6HbTRpkb
gE5KlcuEQ0qFbjdttxvcxEW3m2Ix8mnUPiynEbrdtN1u8CQD3W5+O12oIKR473Qg
sE7XcrutEjqddet0+PPsNnS7Rb7bDZ4sotutbDGG2y3XudzGiA+t/QEtkoDy3N1u
cHQgefcHut0A32qws8S7GgzdbkEh9B1Y7KMDDel2K+HzrK/a9prTK2Rbp9g+MMdV
6GidH4FuN7hSNWc83W7/8XC7qafeXDu3G1yTxSFV5NYKiAy62w1uZQHut6nk9Em3
uaAd3hqgRDkLCLi2brctZW63z5hATgVlqtWg201HTDTiq600+TBaDIIgoQfdbggS
PNDthjEYgzHuMeh2wxiM0RuDbjeMwRi9Meh2QxC9oNsNQfSCbjcE0Qu63RBEL+5u
NxSKoVAssoRi1Z3jL4WohGING6BRjAIHpAFyBLgbxaq7cqQ2im0kRjeK3Uhko5jS
tuFuFFN7OKQaJXwZxWCittIo9maOeLy2UawZA8dPZ7ox3V0+sGJz09fu+uJozuj/
tD50rnKxnxLEN7xvE0p4jOnJ9ArQKPax0IY8pjfTpxxGMXjX5657aIxiWiUpCbwk
9ZFqIAaNYiLaddGXK80/BbTLhWh1GyCeri5lydp10ZcL30ZCu1yIVpusALq6lGjX
BdCVq28sSQtdXcYcS7DQ97kxx5IUS1eXEu26ALpy9Y0liKXvc2OOJYil73MjjSXR
BDJdmVYSw0axbqpExKxIqzsmQkzEYx6nRowaxXr6HRHltQVFsEirFyZCTESeRyJi
1CjW2yMRyq3yjoiQJyJ0I6IPJkI0isHtDmgmgEYxGSlr0jYaxbRR5gagUyFNZ8Kh
Qqpmed7elp+Z7LBstNfg70vuY/nansB3jimj2FYNcQrcxEWjmGIx8mn0WFhOo/mm
I9wMdpZ9gymeH8zm2/eZMvhOuoxi802iOQzWYBKbwcpr2L/BJJrDYA0mscGsvIb9
+0yiOQzWYBLrxMrr0BjFqmkYxeBJRlQZxbZb0rk5XDX+gqUVN4L7jUtIzON6oVHM
FSF2+kYCnW5263TnFmnYAJVika8Ug0eLqBQrW4yhFGtPRFM0fPYHtEgCynNXisHR
geTdH6gUA3wbqc4R70YqVIoFhdB34HkfHWhApVhP80k+z7rFWmi2VMi2LrYONP+P
72hdb408pRhcqXIZtVJsVWlBnHq2jnruzbVTisE1WRxSRW6tgMigK8Xgj2pAPaal
iqX7XNAObw1QopwGBFxbpdgXceI5+n/kz7hATgVlqtWgUkxHTDTiq600+TBaDIIg
oQeVYggSPFAphjEYgzHuMagUwxiM0RuDSjGMwRi9MagUQxC9oFIMQfSCSjEE0Qsq
xRBEL6gUQ6VYJCvFahBvSrGGqBSjwAFpgBwBolKsjrkv39DK22u4cqRWim0l/pRi
/Zxn+kNl0+zgj1tfyD8TJ2pJ/aFfKQZT1yWlWFf5UOKuFFP+BJBqlPClFLuNuCvF
1ueIx2srxeC/nkrIDCafGeISgjW/a9K2goXHcl5ZlT49+WZtpdjtQgkzmaHMsACV
Yl8IbShgHmCGl0MpVoPQK8Xo0SrJ93dSH6kGYlApJqJdF3250vxTQLtciFa3AeLp
6lKWrF0XfbnKEapdLkSrVVYAXV1KtOsC6MrVN5akha4uY44lWOj73JhjSYqlq0uJ
dl0AXbn6xhLE0ve5MccSxNL3uZHGkqgCmaFMK4lhpVi+KhExa9IagokQEzHT49SI
UaXYUL8jory6oAg2aQ3DRIiJKPBIRIwqxR7wSIRyq7wjIuSJCN2IGI6JEJViNUjo
lWJZ7B4uy3bK3o29wiXaPrWLt91QKeaJ7ELKYk8niTnj7WLOeLuYs8h585nOhTSD
CYcLKd3yjL01Py25leV9e3V+QHKeZaed5dvHlFLsE5ca4BPiXZwCN3EjXCl2u/PS
091c336P89JTz3kKwaUH1tGnFJsZltPoCdMRbhI7y77CFM/3ZvPt20wZfI4updgT
JlEdBmtQiU1i5TXsX2ES1WGwBpVYb1Zew/5tJlEdBmtQieWw8jo0SrFKGkoxeJIR
VUqxHZZMbjZXk//F0o4bxl3lEhP7cd24H7nAO12oIKR473QgsE6fqaEU20p8KMUa
olIs8pVi8GgxopVirPl0Uhfn70X4sxKWZPOlpNYRrhS7w7l0YcSn1v6AFklAee5K
MTg6kLz7A5VigG8j1UXi3UiFSrGgEPoOvOSjAw2oFHvHfJzvZV1m3WM2V2hofdS6
3vwz38G6IAKVYnCl6sqolWJ9Sme6lGLrc8To/+Wo595cO6UYXJPFITXVrRUQGXSl
WA3XZ/f7VHL6pPtc0A5vDVACZYVPKVY7XjxHV5PfUSlmpJhoxFdbafJhtBgEQUIP
KsUQJHigUgxjMAZj3GNQKYYxGKM3BpViGIMxemNQKYYgekGlGILoBZViCKIXVIoh
iF5QKYZKschUijURJgHB+IMR2PneCaMeGpfZkIgiMQn4CBN5HK61/JOYxQFpkHLU
VPgTNFOY8LRGmMyoSJ7ArWQTgZmUYibFfZBw6TNMHZU+V1V8hguB9Blmrkmfwf8m
fc5QfIZ/UEqfYVK89DlN8RleO5E+wy996TO81SV9rqz4XEPxWXxfNJOIAjRAfl8U
Wh+s90V58m3p6dIr7EemP0tvJ3vYAlMKuYGsZ6fBldXhOUVTiXS5VS7EoQgIGeJ0
OSlXdHNsxdl+XyQ+kyDOq2Vcs2bJYTk9CgKZCFiWBC9Ic2J58kPpVtMf7LLE0tJ0
dj/bI7EyiWM/Yh+AURqFCd+euNSV8MRwJfxA6arE39i5tr9KzdzXbI4tlfycuJHt
bSNRmfAdZQlPDlfCvymdb7vCFqb8Xlps28PemJJM9tnWsy3gWhrVCa8aroQnJpwo
rWXdYspKuJXEWceYchNqkLMVZkXpNXxbWcLjw5XwCglbTHWsyxIbJFRlWWuPxH8m
MOz5CtF6DZcTzocr4VzCe4l1rM/a6iUkcKzVYWufcCHxfIU+UXoNl39ppoQr4eaE
+bZa1sKUugnFtjjrjSltEvbZzlaI/mt4RrgS3tx2ovTu1M2mAbZbSZPU0abxthqk
eurMKL2Gf1WWcDZcCc+xbTH1S12WONhWlW2W2iNxko1hM1Oj/xpuDVfCW9hWJfZL
nWsbaDNzzVJzbIW2nxMzU6P/7/C0cCW8mW2erWfq2JR+tjO2BqnXpYyz7bFVSW0a
pdfwbYmLXAmvHq6Ej0g7UTo740PTnLRbybCMYaY302qQbhlTo/QaviPxeVfCE8KV
8DFpW0xzMl5PnJdWlR2R0T3xnTSG7ZVREKXXcPmSkhSuhI9KW5n4VMYc29w0E/dA
Rkvb22nnEntk9Ir6a3jlcCX8gbQXbU9mjEl5Ku1nW0FG9ZRlaftt3TOaROk1fG/Z
7dka1zrhVRxThCMgoqgIvoL0xrZzl/t72giCIAiiROs9bXU8giC+8f6etjoKQZDY
wft72uooBEF84/09bXUUgiC+8f6etjoKQRDfeH9PWx2FIIhvvL+nrY5CEMQ33t/T
VkchCOIbeE9bfju7h8XEiG9SX3Zu3ZtK4E3qp/vbPnWktr9jWu+KNZOHf1Jx47y3
KlsHMXtfbl21R9XZS/cPTzq4Nzlp3/j4e+Z+cfCHw3MvlKx7+M7GVQYvqDe45IVl
Ld/6ttG277Kefbhl11pXf8/8LLPSu6uG7X2tx6uzmi+s3LLe/Hvbr3njyM7z86Yc
b73qvWcvdm95eOmdu2yD92dNXP3m+xd/vfundSXW6md2D1ve5r/vd6jbLHdK+uDx
lVa892f6+JrXjx13Z/5NzRoX9a7fYd0z7UtKZySYS54b8Ne65iVrL2Q/0+IOdt6p
o62e+c46KX16ywOPOv/3YUV7ycCkkoG7VlrPfTqAsUxamTBp5f0HzCUDV5CvSy72
/XVU0zZ1x8F7wE0czYSpJfA2HLyLedfYUQX5g8dlDhs5ZFSm+m1gAJKpXMc4DkiD
lCPxv4YCeZFuBouo/zMn4n+maa4wJ6g83OwYIUxXgtyL/z1XJ44S+5HO+5kR8GRK
YKRQW27h6Pyxw0bkjxyX2e7ecflklPAfX+n40Mis7GZZ2Q2yGxDxCPimI4X/Apni
iA7tnPFCo8QgaMpIoYCuo8blDxo16gGPELhpN1KY8uUaQu4/hmWk8GKyXE3+WPcY
+LfWSOHlaGcR40YNHjXc/efwV+RIcYdr/+PkRiI2YfY0kvNol4OtDqzMbwU/USOf
+80c8UUO5Y8ChHH8PwAAAP//AwDyzc5n</Template></GraphPadPrismFile>
