# Supplementary material for: Par protein localization during the early development of Mnemiopsis leidyi suggests different modes of epithelial organization in the metazoa
Source: eLife journal article supplement (doi:10.7554/elife.54927), 2020-07-27
Supplement: fig2-figsupp10-data1 [file elife-54927-fig2-figsupp10-data1-v3.pzfx]

<?xml version="1.0" encoding="UTF-8"?><GraphPadPrismFile PrismXMLVersion="5.00">
<Created>
<OriginalVersion CreatedByProgram="GraphPad Prism" CreatedByVersion="8.4.0.455" Login="root" DateTime="2020-07-04T12:26:36+01:00"></OriginalVersion>
<MostRecentVersion CreatedByProgram="GraphPad Prism" CreatedByVersion="8.4.0.455" Login="root" DateTime="2020-07-04T13:18:21+01:00"></MostRecentVersion>
</Created>
<InfoSequence>
<Ref ID="Info0" Selected="1"></Ref>
</InfoSequence>
<Info ID="Info0">
<Title>Project info 1</Title>
<Notes></Notes>
<Constant><Name>Experiment Date</Name><Value>2020-06-29</Value></Constant>
<Constant><Name>Experiment ID</Name><Value></Value></Constant>
<Constant><Name>Notebook ID</Name><Value></Value></Constant>
<Constant><Name>Project</Name><Value></Value></Constant>
<Constant><Name>Experimenter</Name><Value></Value></Constant>
<Constant><Name>Protocol</Name><Value></Value></Constant>
</Info>

<TableSequence>

<Ref ID="Table0"></Ref>
<Ref ID="Table4"></Ref>
<Ref ID="Table8"></Ref>
<Ref ID="Table12"></Ref>
<Ref ID="Table16"></Ref>
<Ref ID="Table48"></Ref>
<Ref ID="Table17"></Ref>
<Ref ID="Table56"></Ref>
<Ref ID="Table18"></Ref>
<Ref ID="Table60"></Ref>
<Ref ID="Table20"></Ref>
<Ref ID="Table64"></Ref>
<Ref ID="Table19"></Ref>
<Ref ID="Table68"></Ref>
<Ref ID="Table21"></Ref>
<Ref ID="Table72"></Ref>
<Ref ID="Table22"></Ref>
<Ref ID="Table76"></Ref>
<Ref ID="Table23"></Ref>
<Ref ID="Table80"></Ref>
<Ref ID="Table24"></Ref>
<Ref ID="Table84"></Ref>
<Ref ID="Table25"></Ref>
<Ref ID="Table88"></Ref>
<Ref ID="Table26"></Ref>
<Ref ID="Table52"></Ref>
<Ref ID="Table27"></Ref>
<Ref ID="Table38"></Ref>
<Ref ID="Table28"></Ref>
<Ref ID="Table34"></Ref>
<Ref ID="Table29"></Ref>
<Ref ID="Table30" Selected="1"></Ref>
</TableSequence>
<Table ID="Table0" XFormat="numbers" YFormat="replicates" Replicates="4" TableType="XY" EVFormat="AsteriskAfterNumber">
<Title>1-cell</Title>
<RowTitlesColumn Width="84">
<Subcolumn></Subcolumn>
</RowTitlesColumn>
<SubColumnTitles OwnSet="0">
<Subcolumn>
<d>1</d>
</Subcolumn>
<Subcolumn>
<d>2</d>
</Subcolumn>
<Subcolumn>
<d>3</d>
</Subcolumn>
<Subcolumn>
<d>4</d>
</Subcolumn>
</SubColumnTitles>
<XColumn Width="51" Subcolumns="1" Decimals="15">
<Title></Title>
<Subcolumn></Subcolumn>
</XColumn>
<XAdvancedColumn Version="1" Width="51" Decimals="15" Subcolumns="1">
<Title></Title>
<Subcolumn></Subcolumn>
</XAdvancedColumn>
<YColumn Width="336" Decimals="9" Subcolumns="4">
<Title>Vegetal</Title>
<Subcolumn>
<d>0.204876915</d>
<d>0.225806043</d>
<d>0.267279889</d>
<d>0.325268505</d>
<d>0.364822422</d>
<d>0.351765215</d>
<d>0.304723786</d>
<d>0.294547528</d>
<d>0.296849753</d>
<d>0.303186153</d>
<d>0.274192901</d>
<d>0.278032759</d>
<d>0.313556727</d>
<d>0.355989482</d>
<d>0.366934556</d>
<d>0.378071834</d>
<d>0.38671257</d>
<d>0.395929919</d>
<d>0.397657644</d>
<d>0.417625751</d>
<d>0.414939118</d>
<d>0.43029855</d>
<d>0.457181781</d>
<d>0.442204645</d>
<d>0.439323695</d>
<d>0.443163553</d>
<d>0.469470171</d>
<d>0.49923224</d>
<d>0.484639512</d>
<d>0.515744897</d>
<d>0.502495485</d>
<d>0.497694607</d>
<d>0.505376435</d>
<d>0.487518349</d>
<d>0.482527379</d>
<d>0.505568639</d>
<d>0.489630482</d>
<d>0.49347034</d>
<d>0.48214297</d>
<d>0.472733417</d>
<d>0.515937101</d>
<d>0.489822686</d>
<d>0.509408497</d>
<d>0.488094962</d>
<d>0.518049234</d>
<d>0.500383352</d>
<d>0.497120106</d>
<d>0.489630482</d>
<d>0.487326145</d>
<d>0.472733417</d>
<d>0.495390269</d>
<d>0.470236876</d>
<d>0.470621284</d>
<d>0.454300831</d>
<d>0.442396849</d>
<d></d>
<d></d>
<d></d>
<d></d>
<d></d>
<d></d>
<d></d>
<d></d>
<d></d>
<d></d>
<d></d>
<d></d>
<d></d>
<d></d>
<d></d>
<d></d>
</Subcolumn>
<Subcolumn>
<d>0.614615433</d>
<d>0.634639945</d>
<d>0.648487206</d>
<d>0.648913708</d>
<d>0.658074132</d>
<d>0.650404123</d>
<d>0.659353638</d>
<d>0.708352178</d>
<d>0.696421834</d>
<d>0.687687913</d>
<d>0.686195155</d>
<d>0.721772937</d>
<d>0.721559686</d>
<d>0.715382434</d>
<d>0.72496936</d>
<d>0.722625941</d>
<d>0.729229695</d>
<d>0.731786365</d>
<d>0.717939104</d>
<d>0.685131243</d>
<d>0.705155755</d>
<d>0.719429518</d>
<d>0.713465518</d>
<d>0.721986188</d>
<d>0.712825764</d>
<d>0.712399262</d>
<d>0.704729253</d>
<d>0.678525146</d>
<d>0.680444406</d>
<d>0.689604829</d>
<d>0.684917992</d>
<d>0.684064988</d>
<d>0.697698997</d>
<d>0.677887736</d>
<d>0.663400722</d>
<d>0.670004476</d>
<d>0.669151472</d>
<d>0.641030448</d>
<d>0.638262871</d>
<d>0.648060704</d>
<d>0.632083276</d>
<d>0.643162959</d>
<d>0.629526606</d>
<d>0.62760969</d>
<d>0.62249635</d>
<d>0.606945424</d>
<d>0.594588578</d>
<d>0.608435838</d>
<d>0.607585177</d>
<d>0.613335927</d>
<d>0.621219187</d>
<d>0.601618834</d>
<d>0.618662517</d>
<d>0.628036192</d>
<d>0.625266271</d>
<d>0.597358499</d>
<d>0.593737917</d>
<d>0.573071308</d>
<d>0.585641405</d>
<d>0.58393774</d>
<d>0.554323959</d>
<d>0.560503554</d>
<d>0.559650549</d>
<d>0.548786461</d>
<d>0.560930056</d>
<d>0.576267731</d>
<d>0.560503554</d>
<d>0.572007396</d>
<d>0.560503554</d>
<d>0.568597722</d>
<d>0.583724489</d>
</Subcolumn>
<Subcolumn>
<d>0.753973865</d>
<d>0.74299718</d>
<d>0.767601042</d>
<d>0.760786204</d>
<d>0.769114895</d>
<d>0.803179092</d>
<d>0.721423522</d>
<d>0.768735183</d>
<d>0.800531098</d>
<d>0.780091581</d>
<d>0.806963725</d>
<d>0.763059482</d>
<d>0.764193623</d>
<d>0.766087189</d>
<d>0.74526796</d>
<d>0.809234505</d>
<d>0.78463314</d>
<d>0.812264709</d>
<d>0.803179092</d>
<d>0.789931627</d>
<d>0.781605434</d>
<d>0.758895137</d>
<d>0.732400207</d>
<d>0.780848507</d>
<d>0.719152742</d>
<d>0.736562054</d>
<d>0.779334654</d>
<d>0.746781813</d>
<d>0.747918452</d>
<d>0.704391423</d>
<d>0.722937375</d>
<d>0.769871822</d>
<d>0.752460012</d>
<d>0.773656455</d>
<d>0.773276743</d>
<d>0.761543131</d>
<d>0.777441088</d>
<d>0.780091581</d>
<d>0.757001571</d>
<d>0.774793094</d>
<d>0.766844116</d>
<d>0.781605434</d>
<d>0.748675378</d>
<d>0.711203763</d>
<d>0.729749715</d>
<d>0.728615574</d>
<d>0.673352436</d>
<d>0.67638264</d>
<d>0.672595509</d>
<d>0.697576586</d>
<d>0.689630105</d>
<d>0.64988771</d>
<d>0.674868787</d>
<d>0.672595509</d>
<d>0.655186196</d>
<d>0.679030634</d>
<d>0.680544488</d>
<d></d>
<d></d>
<d></d>
<d></d>
<d></d>
<d></d>
<d></d>
<d></d>
<d></d>
<d></d>
<d></d>
<d></d>
<d></d>
<d></d>
</Subcolumn>
<Subcolumn>
<d>0.109115377</d>
<d>0.151431533</d>
<d>0.153544734</d>
<d>0.175025915</d>
<d>0.259775829</d>
<d>0.231330662</d>
<d>0.20788298</d>
<d>0.198843377</d>
<d>0.207639289</d>
<d>0.271723962</d>
<d>0.312986548</d>
<d>0.227946873</d>
<d>0.310898808</d>
<d>0.296294321</d>
<d>0.234958142</d>
<d>0.233763935</d>
<d>0.256650279</d>
<d>0.235827428</d>
<d>0.220371841</d>
<d>0.204185181</d>
<d>0.156021653</d>
<d>0.219563175</d>
<d>0.232430303</d>
<d>0.262660112</d>
<d>0.252397204</d>
<d>0.193605839</d>
<d>0.217599098</d>
<d>0.188233725</d>
<d>0.213409067</d>
<d>0.222438971</d>
<d>0.171050478</d>
<d>0.210746652</d>
<d>0.260200166</d>
<d>0.270272728</d>
<d>0.230328013</d>
<d>0.250332499</d>
<d>0.206131072</d>
<d>0.241486879</d>
<d>0.237960027</d>
<d>0.226298018</d>
<d>0.171292957</d>
<d>0.166295472</d>
<d>0.125488746</d>
<d>0.154863818</d>
<d>0.223059716</d>
<d>0.267169002</d>
<d>0.187814237</d>
<d>0.14843571</d>
<d>0.205064166</d>
<d>0.217263265</d>
<d>0.179149264</d>
<d>0.155131757</d>
<d>0.184214642</d>
<d>0.18693404</d>
<d>0.224691598</d>
<d>0.234304662</d>
<d>0.20546668</d>
<d>0.165434673</d>
<d>0.205305432</d>
<d>0.206320205</d>
<d>0.193584016</d>
<d>0.140795209</d>
<d>0.204080915</d>
<d>0.222856034</d>
<d>0.297126022</d>
<d>0.257159484</d>
<d>0.246875966</d>
<d></d>
<d></d>
<d></d>
<d></d>
</Subcolumn>
</YColumn>
<YColumn Width="336" Decimals="9" Subcolumns="4">
<Title>Animal</Title>
<Subcolumn>
<d>0.937018302</d>
<d>0.978302056</d>
<d>0.97119684</d>
<d>1</d>
<d>0.955260796</d>
<d>0.968508095</d>
<d>0.938171526</d>
<d>0.920121236</d>
<d>0.956988521</d>
<d>0.974269994</d>
<d>0.94181918</d>
<d>0.931258515</d>
<d>0.948924396</d>
<d>0.934331668</d>
<d>0.994430305</d>
<d>0.978686464</d>
<d>0.992318172</d>
<d>0.951228733</d>
<d>0.953915367</d>
<d>0.964860441</d>
<d>0.969661319</d>
<d>0.969084707</d>
<d>0.972157861</d>
<d>0.938748139</d>
<d>0.975228902</d>
<d>0.929146381</d>
<d>0.957757337</d>
<d>0.966972574</d>
<d>0.949883305</d>
<d>0.946620059</d>
<d>0.924729911</d>
<d>0.899384313</d>
<d>0.950652121</d>
<d>0.945851242</d>
<d>0.903416375</d>
<d>0.925690932</d>
<d>0.917816899</d>
<d>0.896313272</d>
<d>0.931258515</d>
<d>0.913018133</d>
<d>0.915704766</d>
<d>0.899384313</d>
<d>0.869047745</d>
<d></d>
<d></d>
<d></d>
<d></d>
<d></d>
<d></d>
<d></d>
<d></d>
<d></d>
<d></d>
<d></d>
<d></d>
<d></d>
<d></d>
<d></d>
<d></d>
<d></d>
<d></d>
<d></d>
<d></d>
<d></d>
</Subcolumn>
<Subcolumn>
<d>0.649126959</d>
<d>0.641243699</d>
<d>0.654027048</d>
<d>0.660844053</d>
<d>0.64401362</d>
<d>0.632509778</d>
<d>0.623136103</d>
<d>0.620366183</d>
<d>0.62185894</d>
<d>0.634639945</d>
<d>0.670644229</d>
<d>0.669151472</d>
<d>0.666597145</d>
<d>0.670430978</d>
<d>0.681721569</d>
<d>0.688112072</d>
<d>0.683001076</d>
<d>0.678951648</d>
<d>0.665317639</d>
<d>0.659140387</d>
<d>0.656370466</d>
<d>0.685131243</d>
<d>0.689178327</d>
<d>0.694078415</d>
<d>0.691521746</d>
<d>0.684278239</d>
<d>0.690242239</d>
<d>0.687687913</d>
<d>0.673838309</d>
<d>0.688965076</d>
<d>0.697698997</d>
<d>0.666170643</d>
<d>0.66041755</d>
<d>0.680657657</d>
<d>0.662547718</d>
<d>0.666808053</d>
<d>0.66297422</d>
<d>0.678951648</d>
<d>0.698125499</d>
<d>0.702599086</d>
<d>0.714742681</d>
<d>0.715808936</d>
<d>0.700682169</d>
<d>0.729656197</d>
<d>0.759694137</d>
<d>0.765871388</d>
<d>0.797188835</d>
<d>0.825949612</d>
<d>0.856838213</d>
<d>0.888582161</d>
<d>0.893055748</d>
<d>0.926503362</d>
<d>0.964422218</d>
<d>0.98040199</d>
<d>0.992119083</d>
<d>1</d>
<d>0.997019172</d>
<d>0.984875576</d>
<d>0.967618641</d>
<d>0.959948632</d>
<d>0.921390022</d>
<d>0.910736841</d>
<d>0.900512506</d>
<d>0.887942408</d>
</Subcolumn>
<Subcolumn>
<d>0.820968117</d>
<d>0.871687197</d>
<d>0.837623001</d>
<d>0.892506426</d>
<d>0.917107791</d>
<d>0.919758283</d>
<d>0.929598329</d>
<d>0.903483112</d>
<d>0.856168952</d>
<d>0.904996965</d>
<d>0.889855934</d>
<d>0.889855934</d>
<d>0.879636176</d>
<d>0.872066909</d>
<d>0.849736325</d>
<d>0.906888032</d>
<d>0.928084476</d>
<d>0.930355256</d>
<d>0.935653742</d>
<d>0.94701014</d>
<d>0.94246858</d>
<d>0.908024671</d>
<d>0.994321801</d>
<d>0.99318766</d>
<d>0.98031741</d>
<d>0.987889174</d>
<d>0.995835654</d>
<d>0.964799165</d>
<d>1</d>
<d>0.958364039</d>
<d>0.989023315</d>
<d>0.943225507</d>
<d>0.93792702</d>
<d>0.977289703</d>
<d>0.945873501</d>
<d>0.898939054</d>
<d>0.901212332</d>
<d>0.917487503</d>
<d>0.899318766</d>
<d>0.875851542</d>
<d></d>
<d></d>
<d></d>
<d></d>
<d></d>
<d></d>
<d></d>
<d></d>
<d></d>
<d></d>
<d></d>
<d></d>
<d></d>
<d></d>
<d></d>
<d></d>
<d></d>
<d></d>
<d></d>
<d></d>
<d></d>
<d></d>
<d></d>
<d></d>
</Subcolumn>
<Subcolumn>
<d>0.428216024</d>
<d>0.426964835</d>
<d>0.446367973</d>
<d>0.430890563</d>
<d>0.52371744</d>
<d>0.375515722</d>
<d>0.371148682</d>
<d>0.278651576</d>
<d>0.341774822</d>
<d>0.371549984</d>
<d>0.25757776</d>
<d>0.321738814</d>
<d>0.315182192</d>
<d>0.318397459</d>
<d>0.349863909</d>
<d>0.368031619</d>
<d>0.372003419</d>
<d>0.382524566</d>
<d>0.398170499</d>
<d>0.381451598</d>
<d>0.353221025</d>
<d>0.478500027</d>
<d>0.580463498</d>
<d>0.579205034</d>
<d>0.48692131</d>
<d>0.345442311</d>
<d>0.435461285</d>
<d>0.390263271</d>
<d>0.40997557</d>
<d>0.450345835</d>
<d>0.606197753</d>
<d>0.548753357</d>
<d>0.615528331</d>
<d>0.639871971</d>
<d>0.599795106</d>
<d>0.644240224</d>
<d>0.555962246</d>
<d>0.452392355</d>
<d>0.475768506</d>
<d>0.584864485</d>
<d>0.669538018</d>
<d>0.585391876</d>
<d>0.513987985</d>
<d>0.515855071</d>
<d>0.568253487</d>
<d>0.682551845</d>
<d>0.735293369</d>
<d>0.698645151</d>
<d>0.684780223</d>
<d>0.682972545</d>
<d>0.694617581</d>
<d>0.79401684</d>
<d>0.728799791</d>
<d>0.779542079</d>
<d>0.894451483</d>
<d>0.903311652</d>
<d>0.841281984</d>
<d>0.855623382</d>
<d>0.989493402</d>
<d>0.973641362</d>
<d>0.86000982</d>
<d>1</d>
<d>0.812551906</d>
<d></d>
</Subcolumn>
</YColumn>
</Table>
<Table ID="Table4" XFormat="none" TableType="OneWay" EVFormat="AsteriskAfterNumber">
<Title>Copy of 1-cell</Title>
<RowTitlesColumn Width="84">
<Subcolumn></Subcolumn>
</RowTitlesColumn>
<YColumn Width="84" Decimals="9" Subcolumns="1">
<Title>Vegetal</Title>
<Subcolumn>
<d>0.204876915</d>
<d>0.225806043</d>
<d>0.267279889</d>
<d>0.325268505</d>
<d>0.364822422</d>
<d>0.351765215</d>
<d>0.304723786</d>
<d>0.294547528</d>
<d>0.296849753</d>
<d>0.303186153</d>
<d>0.274192901</d>
<d>0.278032759</d>
<d>0.313556727</d>
<d>0.355989482</d>
<d>0.366934556</d>
<d>0.378071834</d>
<d>0.38671257</d>
<d>0.395929919</d>
<d>0.397657644</d>
<d>0.417625751</d>
<d>0.414939118</d>
<d>0.43029855</d>
<d>0.457181781</d>
<d>0.442204645</d>
<d>0.439323695</d>
<d>0.443163553</d>
<d>0.469470171</d>
<d>0.49923224</d>
<d>0.484639512</d>
<d>0.515744897</d>
<d>0.502495485</d>
<d>0.497694607</d>
<d>0.505376435</d>
<d>0.487518349</d>
<d>0.482527379</d>
<d>0.505568639</d>
<d>0.489630482</d>
<d>0.49347034</d>
<d>0.48214297</d>
<d>0.472733417</d>
<d>0.515937101</d>
<d>0.489822686</d>
<d>0.509408497</d>
<d>0.488094962</d>
<d>0.518049234</d>
<d>0.500383352</d>
<d>0.497120106</d>
<d>0.489630482</d>
<d>0.487326145</d>
<d>0.472733417</d>
<d>0.495390269</d>
<d>0.470236876</d>
<d>0.470621284</d>
<d>0.454300831</d>
<d>0.442396849</d>
<d>0.614615433</d>
<d>0.634639945</d>
<d>0.648487206</d>
<d>0.648913708</d>
<d>0.658074132</d>
<d>0.650404123</d>
<d>0.659353638</d>
<d>0.708352178</d>
<d>0.696421834</d>
<d>0.687687913</d>
<d>0.686195155</d>
<d>0.721772937</d>
<d>0.721559686</d>
<d>0.715382434</d>
<d>0.72496936</d>
<d>0.722625941</d>
<d>0.729229695</d>
<d>0.731786365</d>
<d>0.717939104</d>
<d>0.685131243</d>
<d>0.705155755</d>
<d>0.719429518</d>
<d>0.713465518</d>
<d>0.721986188</d>
<d>0.712825764</d>
<d>0.712399262</d>
<d>0.704729253</d>
<d>0.678525146</d>
<d>0.680444406</d>
<d>0.689604829</d>
<d>0.684917992</d>
<d>0.684064988</d>
<d>0.697698997</d>
<d>0.677887736</d>
<d>0.663400722</d>
<d>0.670004476</d>
<d>0.669151472</d>
<d>0.641030448</d>
<d>0.638262871</d>
<d>0.648060704</d>
<d>0.632083276</d>
<d>0.643162959</d>
<d>0.629526606</d>
<d>0.62760969</d>
<d>0.62249635</d>
<d>0.606945424</d>
<d>0.594588578</d>
<d>0.608435838</d>
<d>0.607585177</d>
<d>0.613335927</d>
<d>0.621219187</d>
<d>0.601618834</d>
<d>0.618662517</d>
<d>0.628036192</d>
<d>0.625266271</d>
<d>0.597358499</d>
<d>0.593737917</d>
<d>0.573071308</d>
<d>0.585641405</d>
<d>0.58393774</d>
<d>0.554323959</d>
<d>0.560503554</d>
<d>0.559650549</d>
<d>0.548786461</d>
<d>0.560930056</d>
<d>0.576267731</d>
<d>0.560503554</d>
<d>0.572007396</d>
<d>0.560503554</d>
<d>0.568597722</d>
<d>0.583724489</d>
<d>0.753973865</d>
<d>0.74299718</d>
<d>0.767601042</d>
<d>0.760786204</d>
<d>0.769114895</d>
<d>0.803179092</d>
<d>0.721423522</d>
<d>0.768735183</d>
<d>0.800531098</d>
<d>0.780091581</d>
<d>0.806963725</d>
<d>0.763059482</d>
<d>0.764193623</d>
<d>0.766087189</d>
<d>0.74526796</d>
<d>0.809234505</d>
<d>0.78463314</d>
<d>0.812264709</d>
<d>0.803179092</d>
<d>0.789931627</d>
<d>0.781605434</d>
<d>0.758895137</d>
<d>0.732400207</d>
<d>0.780848507</d>
<d>0.719152742</d>
<d>0.736562054</d>
<d>0.779334654</d>
<d>0.746781813</d>
<d>0.747918452</d>
<d>0.704391423</d>
<d>0.722937375</d>
<d>0.769871822</d>
<d>0.752460012</d>
<d>0.773656455</d>
<d>0.773276743</d>
<d>0.761543131</d>
<d>0.777441088</d>
<d>0.780091581</d>
<d>0.757001571</d>
<d>0.774793094</d>
<d>0.766844116</d>
<d>0.781605434</d>
<d>0.748675378</d>
<d>0.711203763</d>
<d>0.729749715</d>
<d>0.728615574</d>
<d>0.673352436</d>
<d>0.67638264</d>
<d>0.672595509</d>
<d>0.697576586</d>
<d>0.689630105</d>
<d>0.64988771</d>
<d>0.674868787</d>
<d>0.672595509</d>
<d>0.655186196</d>
<d>0.679030634</d>
<d>0.680544488</d>
<d>0.109115377</d>
<d>0.151431533</d>
<d>0.153544734</d>
<d>0.175025915</d>
<d>0.259775829</d>
<d>0.231330662</d>
<d>0.20788298</d>
<d>0.198843377</d>
<d>0.207639289</d>
<d>0.271723962</d>
<d>0.312986548</d>
<d>0.227946873</d>
<d>0.310898808</d>
<d>0.296294321</d>
<d>0.234958142</d>
<d>0.233763935</d>
<d>0.256650279</d>
<d>0.235827428</d>
<d>0.220371841</d>
<d>0.204185181</d>
<d>0.156021653</d>
<d>0.219563175</d>
<d>0.232430303</d>
<d>0.262660112</d>
<d>0.252397204</d>
<d>0.193605839</d>
<d>0.217599098</d>
<d>0.188233725</d>
<d>0.213409067</d>
<d>0.222438971</d>
<d>0.171050478</d>
<d>0.210746652</d>
<d>0.260200166</d>
<d>0.270272728</d>
<d>0.230328013</d>
<d>0.250332499</d>
<d>0.206131072</d>
<d>0.241486879</d>
<d>0.237960027</d>
<d>0.226298018</d>
<d>0.171292957</d>
<d>0.166295472</d>
<d>0.125488746</d>
<d>0.154863818</d>
<d>0.223059716</d>
<d>0.267169002</d>
<d>0.187814237</d>
<d>0.14843571</d>
<d>0.205064166</d>
<d>0.217263265</d>
<d>0.179149264</d>
<d>0.155131757</d>
<d>0.184214642</d>
<d>0.18693404</d>
<d>0.224691598</d>
<d>0.234304662</d>
<d>0.20546668</d>
<d>0.165434673</d>
<d>0.205305432</d>
<d>0.206320205</d>
<d>0.193584016</d>
<d>0.140795209</d>
<d>0.204080915</d>
<d>0.222856034</d>
<d>0.297126022</d>
<d>0.257159484</d>
<d>0.246875966</d>
</Subcolumn>
</YColumn>
<YColumn Width="84" Decimals="9" Subcolumns="1">
<Title>Animal</Title>
<Subcolumn>
<d>0.937018302</d>
<d>0.978302056</d>
<d>0.97119684</d>
<d>1</d>
<d>0.955260796</d>
<d>0.968508095</d>
<d>0.938171526</d>
<d>0.920121236</d>
<d>0.956988521</d>
<d>0.974269994</d>
<d>0.94181918</d>
<d>0.931258515</d>
<d>0.948924396</d>
<d>0.934331668</d>
<d>0.994430305</d>
<d>0.978686464</d>
<d>0.992318172</d>
<d>0.951228733</d>
<d>0.953915367</d>
<d>0.964860441</d>
<d>0.969661319</d>
<d>0.969084707</d>
<d>0.972157861</d>
<d>0.938748139</d>
<d>0.975228902</d>
<d>0.929146381</d>
<d>0.957757337</d>
<d>0.966972574</d>
<d>0.949883305</d>
<d>0.946620059</d>
<d>0.924729911</d>
<d>0.899384313</d>
<d>0.950652121</d>
<d>0.945851242</d>
<d>0.903416375</d>
<d>0.925690932</d>
<d>0.917816899</d>
<d>0.896313272</d>
<d>0.931258515</d>
<d>0.913018133</d>
<d>0.915704766</d>
<d>0.899384313</d>
<d>0.869047745</d>
<d>0.649126959</d>
<d>0.641243699</d>
<d>0.654027048</d>
<d>0.660844053</d>
<d>0.64401362</d>
<d>0.632509778</d>
<d>0.623136103</d>
<d>0.620366183</d>
<d>0.62185894</d>
<d>0.634639945</d>
<d>0.670644229</d>
<d>0.669151472</d>
<d>0.666597145</d>
<d>0.670430978</d>
<d>0.681721569</d>
<d>0.688112072</d>
<d>0.683001076</d>
<d>0.678951648</d>
<d>0.665317639</d>
<d>0.659140387</d>
<d>0.656370466</d>
<d>0.685131243</d>
<d>0.689178327</d>
<d>0.694078415</d>
<d>0.691521746</d>
<d>0.684278239</d>
<d>0.690242239</d>
<d>0.687687913</d>
<d>0.673838309</d>
<d>0.688965076</d>
<d>0.697698997</d>
<d>0.666170643</d>
<d>0.66041755</d>
<d>0.680657657</d>
<d>0.662547718</d>
<d>0.666808053</d>
<d>0.66297422</d>
<d>0.678951648</d>
<d>0.698125499</d>
<d>0.702599086</d>
<d>0.714742681</d>
<d>0.715808936</d>
<d>0.700682169</d>
<d>0.729656197</d>
<d>0.759694137</d>
<d>0.765871388</d>
<d>0.797188835</d>
<d>0.825949612</d>
<d>0.856838213</d>
<d>0.888582161</d>
<d>0.893055748</d>
<d>0.926503362</d>
<d>0.964422218</d>
<d>0.98040199</d>
<d>0.992119083</d>
<d>1</d>
<d>0.997019172</d>
<d>0.984875576</d>
<d>0.967618641</d>
<d>0.959948632</d>
<d>0.921390022</d>
<d>0.910736841</d>
<d>0.900512506</d>
<d>0.887942408</d>
<d>0.820968117</d>
<d>0.871687197</d>
<d>0.837623001</d>
<d>0.892506426</d>
<d>0.917107791</d>
<d>0.919758283</d>
<d>0.929598329</d>
<d>0.903483112</d>
<d>0.856168952</d>
<d>0.904996965</d>
<d>0.889855934</d>
<d>0.889855934</d>
<d>0.879636176</d>
<d>0.872066909</d>
<d>0.849736325</d>
<d>0.906888032</d>
<d>0.928084476</d>
<d>0.930355256</d>
<d>0.935653742</d>
<d>0.94701014</d>
<d>0.94246858</d>
<d>0.908024671</d>
<d>0.994321801</d>
<d>0.99318766</d>
<d>0.98031741</d>
<d>0.987889174</d>
<d>0.995835654</d>
<d>0.964799165</d>
<d>1</d>
<d>0.958364039</d>
<d>0.989023315</d>
<d>0.943225507</d>
<d>0.93792702</d>
<d>0.977289703</d>
<d>0.945873501</d>
<d>0.898939054</d>
<d>0.901212332</d>
<d>0.917487503</d>
<d>0.899318766</d>
<d>0.875851542</d>
<d>0.428216024</d>
<d>0.426964835</d>
<d>0.446367973</d>
<d>0.430890563</d>
<d>0.52371744</d>
<d>0.375515722</d>
<d>0.371148682</d>
<d>0.278651576</d>
<d>0.341774822</d>
<d>0.371549984</d>
<d>0.25757776</d>
<d>0.321738814</d>
<d>0.315182192</d>
<d>0.318397459</d>
<d>0.349863909</d>
<d>0.368031619</d>
<d>0.372003419</d>
<d>0.382524566</d>
<d>0.398170499</d>
<d>0.381451598</d>
<d>0.353221025</d>
<d>0.478500027</d>
<d>0.580463498</d>
<d>0.579205034</d>
<d>0.48692131</d>
<d>0.345442311</d>
<d>0.435461285</d>
<d>0.390263271</d>
<d>0.40997557</d>
<d>0.450345835</d>
<d>0.606197753</d>
<d>0.548753357</d>
<d>0.615528331</d>
<d>0.639871971</d>
<d>0.599795106</d>
<d>0.644240224</d>
<d>0.555962246</d>
<d>0.452392355</d>
<d>0.475768506</d>
<d>0.584864485</d>
<d>0.669538018</d>
<d>0.585391876</d>
<d>0.513987985</d>
<d>0.515855071</d>
<d>0.568253487</d>
<d>0.682551845</d>
<d>0.735293369</d>
<d>0.698645151</d>
<d>0.684780223</d>
<d>0.682972545</d>
<d>0.694617581</d>
<d>0.79401684</d>
<d>0.728799791</d>
<d>0.779542079</d>
<d>0.894451483</d>
<d>0.903311652</d>
<d>0.841281984</d>
<d>0.855623382</d>
<d>0.989493402</d>
<d>0.973641362</d>
<d>0.86000982</d>
<d>1</d>
<d>0.812551906</d>
</Subcolumn>
</YColumn>
</Table>
<Table ID="Table8" XFormat="numbers" YFormat="replicates" Replicates="3" TableType="XY" EVFormat="AsteriskAfterNumber">
<Title>2-cell</Title>
<RowTitlesColumn Width="32">
<Subcolumn></Subcolumn>
</RowTitlesColumn>
<SubColumnTitles OwnSet="0">
<Subcolumn>
<d>1</d>
</Subcolumn>
<Subcolumn>
<d>2</d>
</Subcolumn>
<Subcolumn>
<d>3</d>
</Subcolumn>
</SubColumnTitles>
<XColumn Width="51" Subcolumns="1" Decimals="15">
<Title></Title>
<Subcolumn></Subcolumn>
</XColumn>
<XAdvancedColumn Version="1" Width="51" Decimals="15" Subcolumns="1">
<Title></Title>
<Subcolumn></Subcolumn>
</XAdvancedColumn>
<YColumn Width="252" Decimals="9" Subcolumns="3">
<Title>Vegetal</Title>
<Subcolumn>
<d>0.606411794</d>
<d>0.607685259</d>
<d>0.732964882</d>
<d>0.571725039</d>
<d>0.483798698</d>
<d>0.582589917</d>
<d>0.619757907</d>
<d>0.640852615</d>
<d>0.637973843</d>
<d>0.702480898</d>
<d>0.71902078</d>
<d>0.732255717</d>
<d>0.68433571</d>
<d>0.596363888</d>
<d>0.685755724</d>
<d>0.725138801</d>
<d>0.64471849</d>
<d>0.611994151</d>
<d>0.674540475</d>
<d>0.712564179</d>
<d>0.667184363</d>
<d>0.637047381</d>
<d>0.639043486</d>
<d>0.62176075</d>
<d>0.698089466</d>
<d>0.668734082</d>
<d>0.707480426</d>
<d>0.690022505</d>
<d>0.650695015</d>
<d>0.633504925</d>
<d>0.63083166</d>
<d>0.593912973</d>
<d>0.533585107</d>
<d>0.577595442</d>
<d>0.61681681</d>
<d>0.60663583</d>
<d>0.596350412</d>
<d>0.619872451</d>
<d>0.553219373</d>
<d>0.493817969</d>
<d>0.532416079</d>
<d>0.5228752</d>
<d>0.58929919</d>
<d>0.566508214</d>
<d>0.718704098</d>
<d>0.598464431</d>
<d>0.656683332</d>
<d>0.537496463</d>
<d>0.557105462</d>
<d>0.603074845</d>
<d>0.559837684</d>
<d>0.501078065</d>
<d>0.45835467</d>
<d>0.411881628</d>
<d>0.463679302</d>
<d>0.504504292</d>
<d>0.547082822</d>
<d>0.566043298</d>
<d>0.519415284</d>
<d>0.50604222</d>
<d>0.47512701</d>
<d>0.440096622</d>
<d>0.475468958</d>
<d>0.548255219</d>
<d>0.5785876</d>
<d>0.525733758</d>
<d>0.476926031</d>
<d>0.421793092</d>
<d>0.43346315</d>
<d>0.41656616</d>
<d>0.443376299</d>
<d>0.553200844</d>
<d>0.466165591</d>
<d>0.441772676</d>
<d>0.388263574</d>
<d>0.534546943</d>
<d>0.459592761</d>
<d>0.37672322</d>
<d></d>
<d></d>
<d></d>
<d></d>
<d></d>
<d></d>
</Subcolumn>
<Subcolumn>
<d>0.108985429</d>
<d>0.112062172</d>
<d>0.086241009</d>
<d>0.135720394</d>
<d>0.192485035</d>
<d>0.200239768</d>
<d>0.161155916</d>
<d>0.144590131</d>
<d>0.262244094</d>
<d>0.180203216</d>
<d>0.192753307</d>
<d>0.198428933</d>
<d>0.183816502</d>
<d>0.22927181</d>
<d>0.261824919</d>
<d>0.243842323</d>
<d>0.171928707</d>
<d>0.177227075</d>
<d>0.258454754</d>
<d>0.331869016</d>
<d>0.278826646</d>
<d>0.245720226</d>
<d>0.199233749</d>
<d>0.217987626</d>
<d>0.23536661</d>
<d>0.245208833</d>
<d>0.24525075</d>
<d>0.280964437</d>
<d>0.269085025</d>
<d>0.343698127</d>
<d>0.364070019</d>
<d>0.410531346</d>
<d>0.262914773</d>
<d>0.247858017</d>
<d>0.27437501</d>
<d>0.255629517</d>
<d>0.205068661</d>
<d>0.225608223</d>
<d>0.231820392</d>
<d>0.255503764</d>
<d>0.195477943</d>
<d>0.250381449</d>
<d>0.34437719</d>
<d>0.338290773</d>
<d>0.33413256</d>
<d>0.304102882</d>
<d>0.341610637</d>
<d>0.301403397</d>
<d>0.320132124</d>
<d>0.313224124</d>
<d>0.295459499</d>
<d>0.251504837</d>
<d>0.279321272</d>
<d>0.285617277</d>
<d>0.265396288</d>
<d>0.226404655</d>
<d>0.227452591</d>
<d>0.231376067</d>
<d>0.263342332</d>
<d>0.358545296</d>
<d>0.289758723</d>
<d>0.279656612</d>
<d>0.263442934</d>
<d>0.222321893</d>
<d>0.269797622</d>
<d>0.264306433</d>
<d>0.338944686</d>
<d>0.389832498</d>
<d>0.321959726</d>
<d>0.285835248</d>
<d>0.332506162</d>
<d>0.281140491</d>
<d>0.384425144</d>
<d>0.365352694</d>
<d>0.375915897</d>
<d>0.47243507</d>
<d>0.37419728</d>
<d>0.408754045</d>
<d>0.346858705</d>
<d>0.380635804</d>
<d>0.309946178</d>
<d>0.239172717</d>
<d>0.247229255</d>
<d>0.248880803</d>
</Subcolumn>
<Subcolumn>
<d>0.3874067</d>
<d>0.440431608</d>
<d>0.421690348</d>
<d>0.509371553</d>
<d>0.50040401</d>
<d>0.449247878</d>
<d>0.472578985</d>
<d>0.396139953</d>
<d>0.398154468</d>
<d>0.399783421</d>
<d>0.501992377</d>
<d>0.31430859</d>
<d>0.355521283</d>
<d>0.295231577</d>
<d>0.259352182</d>
<d>0.268000576</d>
<d>0.308923637</d>
<d>0.279447521</d>
<d>0.368897883</d>
<d>0.369801832</d>
<d>0.319354101</d>
<d>0.324707692</d>
<d>0.380531153</d>
<d>0.365610461</d>
<d>0.291999498</d>
<d>0.301217933</d>
<d>0.361491036</d>
<d>0.301026074</d>
<d>0.291274494</d>
<d>0.371423406</d>
<d>0.437039032</d>
<d>0.378797047</d>
<d>0.359079891</d>
<d>0.363675272</d>
<d>0.318308103</d>
<d>0.314079835</d>
<d>0.338432958</d>
<d>0.314895234</d>
<d>0.283788321</d>
<d>0.333147624</d>
<d>0.304518269</d>
<d>0.369213343</d>
<d>0.413580634</d>
<d>0.341906705</d>
<d>0.440791343</d>
<d>0.389441507</d>
<d>0.358570728</d>
<d></d>
<d></d>
<d></d>
<d></d>
<d></d>
<d></d>
<d></d>
<d></d>
<d></d>
<d></d>
<d></d>
<d></d>
<d></d>
<d></d>
<d></d>
<d></d>
<d></d>
<d></d>
<d></d>
<d></d>
<d></d>
<d></d>
<d></d>
<d></d>
<d></d>
<d></d>
<d></d>
<d></d>
<d></d>
<d></d>
<d></d>
<d></d>
<d></d>
<d></d>
<d></d>
<d></d>
<d></d>
</Subcolumn>
</YColumn>
<YColumn Width="252" Decimals="9" Subcolumns="3">
<Title>Animal</Title>
<Subcolumn>
<d>0.515136712</d>
<d>0.587606291</d>
<d>0.590778161</d>
<d>0.538751398</d>
<d>0.557486154</d>
<d>0.455753837</d>
<d>0.448594809</d>
<d>0.503370639</d>
<d>0.483089533</d>
<d>0.461297452</d>
<d>0.501261673</d>
<d>0.565435202</d>
<d>0.516277103</d>
<d>0.527472139</d>
<d>0.521463609</d>
<d>0.496393534</d>
<d>0.5480076</d>
<d>0.525892099</d>
<d>0.539209576</d>
<d>0.607048526</d>
<d>0.535444769</d>
<d>0.484907084</d>
<d>0.524248049</d>
<d>0.507856402</d>
<d>0.485489913</d>
<d>0.551740402</d>
<d>0.569643026</d>
<d>0.559052717</d>
<d>0.57280142</d>
<d>0.533755239</d>
<d>0.587190225</d>
<d>0.510288787</d>
<d>0.553962227</d>
<d>0.515209145</d>
<d>0.578503376</d>
<d>0.545563424</d>
<d>0.566669923</d>
<d>0.485843654</d>
<d>0.652512566</d>
<d>0.597972563</d>
<d>0.590821957</d>
<d>0.720412158</d>
<d>0.75821688</d>
<d>0.687665921</d>
<d>0.689613177</d>
<d>0.776318272</d>
<d>0.73672632</d>
<d>0.752144339</d>
<d>0.728061369</d>
<d>0.726306144</d>
<d>0.728113588</d>
<d>0.772790977</d>
<d>0.81018974</d>
<d>0.760726751</d>
<d>0.767710593</d>
<d>0.740041371</d>
<d>0.735289461</d>
<d>0.891317531</d>
<d>0.945500424</d>
<d>0.95603346</d>
<d>0.892461291</d>
<d>0.959011616</d>
<d>1</d>
<d>0.923859946</d>
<d>0.783430135</d>
<d>0.885721697</d>
<d>0.796146253</d>
<d>0.717588974</d>
<d>0.782407657</d>
<d>0.823106311</d>
<d>0.954530907</d>
<d>0.813081987</d>
<d></d>
<d></d>
<d></d>
</Subcolumn>
<Subcolumn>
<d>0.333830754</d>
<d>0.337033249</d>
<d>0.335079895</d>
<d>0.358293791</d>
<d>0.377751882</d>
<d>0.401292735</d>
<d>0.410363676</d>
<d>0.412560152</d>
<d>0.388843245</d>
<d>0.398065089</d>
<d>0.375127848</d>
<d>0.372705018</d>
<d>0.41056488</d>
<d>0.454896799</d>
<d>0.419543603</d>
<d>0.489369729</d>
<d>0.433921296</d>
<d>0.39499673</d>
<d>0.415024899</d>
<d>0.380032193</d>
<d>0.409709763</d>
<d>0.417221375</d>
<d>0.410992438</d>
<d>0.379160309</d>
<d>0.377399775</d>
<d>0.36604014</d>
<d>0.371296591</d>
<d>0.368865378</d>
<d>0.367021009</d>
<d>0.430115189</d>
<d>0.438263946</d>
<d>0.377206955</d>
<d>0.382974799</d>
<d>0.411118191</d>
<d>0.435857883</d>
<d>0.426091112</d>
<d>0.422544894</d>
<d>0.409324123</d>
<d>0.401854429</d>
<d>0.416072836</d>
<d>0.417405811</d>
<d>0.434625509</d>
<d>0.488162506</d>
<d>0.432973961</d>
<d>0.416844117</d>
<d>0.472862628</d>
<d>0.45391593</d>
<d>0.470230211</d>
<d>0.514788484</d>
<d>0.49081169</d>
<d>0.412090676</d>
<d>0.451342197</d>
<d>0.45600342</d>
<d>0.511183582</d>
<d>0.434600359</d>
<d>0.414463205</d>
<d>0.431104442</d>
<d>0.434038665</d>
<d>0.406926443</d>
<d>0.379889673</d>
<d>0.423383243</d>
<d>0.421438272</d>
<d>0.472443453</d>
<d>0.435354873</d>
<d>0.522040207</d>
<d>0.582711557</d>
<d>0.534179507</d>
<d>0.497225063</d>
<d>0.47644238</d>
<d>0.464361765</d>
<d>0.461846716</d>
<d>0.46986972</d>
<d>0.773251622</d>
<d>1</d>
<d>0.69705404</d>
</Subcolumn>
<Subcolumn>
<d>0.483007604</d>
<d>0.557295606</d>
<d>0.577354049</d>
<d>0.494956334</d>
<d>0.455226854</d>
<d>0.483227135</d>
<d>0.452725314</d>
<d>0.40891884</d>
<d>0.478375327</d>
<d>0.552124649</d>
<d>0.502907395</d>
<d>0.500044275</d>
<d>0.487942428</d>
<d>0.535737346</d>
<d>0.479236846</d>
<d>0.470427955</d>
<d>0.445314777</d>
<d>0.521371936</d>
<d>0.60316087</d>
<d>0.506943804</d>
<d>0.514500079</d>
<d>0.484228858</d>
<d>0.597390355</d>
<d>0.69593924</d>
<d>0.554231404</d>
<d>0.540620515</d>
<d>0.63724528</d>
<d>0.578014485</d>
<d>0.586268093</d>
<d>0.689013884</d>
<d>0.670246797</d>
<d>0.681389351</d>
<d>0.780696447</d>
<d>0.874712673</d>
<d>0.801321241</d>
<d>0.773582922</d>
<d>0.835394583</d>
<d>0.808003084</d>
<d>0.840917896</d>
<d>0.775269063</d>
<d>0.828061528</d>
<d>0.94645117</d>
<d>1</d>
<d>0.953791605</d>
<d></d>
<d></d>
<d></d>
<d></d>
<d></d>
<d></d>
<d></d>
<d></d>
<d></d>
<d></d>
<d></d>
<d></d>
<d></d>
<d></d>
<d></d>
<d></d>
<d></d>
<d></d>
<d></d>
<d></d>
<d></d>
<d></d>
<d></d>
<d></d>
<d></d>
<d></d>
<d></d>
<d></d>
<d></d>
<d></d>
<d></d>
</Subcolumn>
</YColumn>
</Table>
<Table ID="Table12" XFormat="none" TableType="OneWay" EVFormat="AsteriskAfterNumber">
<Title>Copy of 2-cell</Title>
<RowTitlesColumn Width="84">
<Subcolumn></Subcolumn>
</RowTitlesColumn>
<YColumn Width="84" Decimals="9" Subcolumns="1">
<Title>Vegetal</Title>
<Subcolumn>
<d>0.606411794</d>
<d>0.607685259</d>
<d>0.732964882</d>
<d>0.571725039</d>
<d>0.483798698</d>
<d>0.582589917</d>
<d>0.619757907</d>
<d>0.640852615</d>
<d>0.637973843</d>
<d>0.702480898</d>
<d>0.71902078</d>
<d>0.732255717</d>
<d>0.68433571</d>
<d>0.596363888</d>
<d>0.685755724</d>
<d>0.725138801</d>
<d>0.64471849</d>
<d>0.611994151</d>
<d>0.674540475</d>
<d>0.712564179</d>
<d>0.667184363</d>
<d>0.637047381</d>
<d>0.639043486</d>
<d>0.62176075</d>
<d>0.698089466</d>
<d>0.668734082</d>
<d>0.707480426</d>
<d>0.690022505</d>
<d>0.650695015</d>
<d>0.633504925</d>
<d>0.63083166</d>
<d>0.593912973</d>
<d>0.533585107</d>
<d>0.577595442</d>
<d>0.61681681</d>
<d>0.60663583</d>
<d>0.596350412</d>
<d>0.619872451</d>
<d>0.553219373</d>
<d>0.493817969</d>
<d>0.532416079</d>
<d>0.5228752</d>
<d>0.58929919</d>
<d>0.566508214</d>
<d>0.718704098</d>
<d>0.598464431</d>
<d>0.656683332</d>
<d>0.537496463</d>
<d>0.557105462</d>
<d>0.603074845</d>
<d>0.559837684</d>
<d>0.501078065</d>
<d>0.45835467</d>
<d>0.411881628</d>
<d>0.463679302</d>
<d>0.504504292</d>
<d>0.547082822</d>
<d>0.566043298</d>
<d>0.519415284</d>
<d>0.50604222</d>
<d>0.47512701</d>
<d>0.440096622</d>
<d>0.475468958</d>
<d>0.548255219</d>
<d>0.5785876</d>
<d>0.525733758</d>
<d>0.476926031</d>
<d>0.421793092</d>
<d>0.43346315</d>
<d>0.41656616</d>
<d>0.443376299</d>
<d>0.553200844</d>
<d>0.466165591</d>
<d>0.441772676</d>
<d>0.388263574</d>
<d>0.534546943</d>
<d>0.459592761</d>
<d>0.37672322</d>
<d>0.108985429</d>
<d>0.112062172</d>
<d>0.086241009</d>
<d>0.135720394</d>
<d>0.192485035</d>
<d>0.200239768</d>
<d>0.161155916</d>
<d>0.144590131</d>
<d>0.262244094</d>
<d>0.180203216</d>
<d>0.192753307</d>
<d>0.198428933</d>
<d>0.183816502</d>
<d>0.22927181</d>
<d>0.261824919</d>
<d>0.243842323</d>
<d>0.171928707</d>
<d>0.177227075</d>
<d>0.258454754</d>
<d>0.331869016</d>
<d>0.278826646</d>
<d>0.245720226</d>
<d>0.199233749</d>
<d>0.217987626</d>
<d>0.23536661</d>
<d>0.245208833</d>
<d>0.24525075</d>
<d>0.280964437</d>
<d>0.269085025</d>
<d>0.343698127</d>
<d>0.364070019</d>
<d>0.410531346</d>
<d>0.262914773</d>
<d>0.247858017</d>
<d>0.27437501</d>
<d>0.255629517</d>
<d>0.205068661</d>
<d>0.225608223</d>
<d>0.231820392</d>
<d>0.255503764</d>
<d>0.195477943</d>
<d>0.250381449</d>
<d>0.34437719</d>
<d>0.338290773</d>
<d>0.33413256</d>
<d>0.304102882</d>
<d>0.341610637</d>
<d>0.301403397</d>
<d>0.320132124</d>
<d>0.313224124</d>
<d>0.295459499</d>
<d>0.251504837</d>
<d>0.279321272</d>
<d>0.285617277</d>
<d>0.265396288</d>
<d>0.226404655</d>
<d>0.227452591</d>
<d>0.231376067</d>
<d>0.263342332</d>
<d>0.358545296</d>
<d>0.289758723</d>
<d>0.279656612</d>
<d>0.263442934</d>
<d>0.222321893</d>
<d>0.269797622</d>
<d>0.264306433</d>
<d>0.338944686</d>
<d>0.389832498</d>
<d>0.321959726</d>
<d>0.285835248</d>
<d>0.332506162</d>
<d>0.281140491</d>
<d>0.384425144</d>
<d>0.365352694</d>
<d>0.375915897</d>
<d>0.47243507</d>
<d>0.37419728</d>
<d>0.408754045</d>
<d>0.346858705</d>
<d>0.380635804</d>
<d>0.309946178</d>
<d>0.239172717</d>
<d>0.247229255</d>
<d>0.248880803</d>
<d>0.3874067</d>
<d>0.440431608</d>
<d>0.421690348</d>
<d>0.509371553</d>
<d>0.50040401</d>
<d>0.449247878</d>
<d>0.472578985</d>
<d>0.396139953</d>
<d>0.398154468</d>
<d>0.399783421</d>
<d>0.501992377</d>
<d>0.31430859</d>
<d>0.355521283</d>
<d>0.295231577</d>
<d>0.259352182</d>
<d>0.268000576</d>
<d>0.308923637</d>
<d>0.279447521</d>
<d>0.368897883</d>
<d>0.369801832</d>
<d>0.319354101</d>
<d>0.324707692</d>
<d>0.380531153</d>
<d>0.365610461</d>
<d>0.291999498</d>
<d>0.301217933</d>
<d>0.361491036</d>
<d>0.301026074</d>
<d>0.291274494</d>
<d>0.371423406</d>
<d>0.437039032</d>
<d>0.378797047</d>
<d>0.359079891</d>
<d>0.363675272</d>
<d>0.318308103</d>
<d>0.314079835</d>
<d>0.338432958</d>
<d>0.314895234</d>
<d>0.283788321</d>
<d>0.333147624</d>
<d>0.304518269</d>
<d>0.369213343</d>
<d>0.413580634</d>
<d>0.341906705</d>
<d>0.440791343</d>
<d>0.389441507</d>
<d>0.358570728</d>
</Subcolumn>
</YColumn>
<YColumn Width="84" Decimals="9" Subcolumns="1">
<Title>Animal</Title>
<Subcolumn>
<d>0.515136712</d>
<d>0.587606291</d>
<d>0.590778161</d>
<d>0.538751398</d>
<d>0.557486154</d>
<d>0.455753837</d>
<d>0.448594809</d>
<d>0.503370639</d>
<d>0.483089533</d>
<d>0.461297452</d>
<d>0.501261673</d>
<d>0.565435202</d>
<d>0.516277103</d>
<d>0.527472139</d>
<d>0.521463609</d>
<d>0.496393534</d>
<d>0.5480076</d>
<d>0.525892099</d>
<d>0.539209576</d>
<d>0.607048526</d>
<d>0.535444769</d>
<d>0.484907084</d>
<d>0.524248049</d>
<d>0.507856402</d>
<d>0.485489913</d>
<d>0.551740402</d>
<d>0.569643026</d>
<d>0.559052717</d>
<d>0.57280142</d>
<d>0.533755239</d>
<d>0.587190225</d>
<d>0.510288787</d>
<d>0.553962227</d>
<d>0.515209145</d>
<d>0.578503376</d>
<d>0.545563424</d>
<d>0.566669923</d>
<d>0.485843654</d>
<d>0.652512566</d>
<d>0.597972563</d>
<d>0.590821957</d>
<d>0.720412158</d>
<d>0.75821688</d>
<d>0.687665921</d>
<d>0.689613177</d>
<d>0.776318272</d>
<d>0.73672632</d>
<d>0.752144339</d>
<d>0.728061369</d>
<d>0.726306144</d>
<d>0.728113588</d>
<d>0.772790977</d>
<d>0.81018974</d>
<d>0.760726751</d>
<d>0.767710593</d>
<d>0.740041371</d>
<d>0.735289461</d>
<d>0.891317531</d>
<d>0.945500424</d>
<d>0.95603346</d>
<d>0.892461291</d>
<d>0.959011616</d>
<d>1</d>
<d>0.923859946</d>
<d>0.783430135</d>
<d>0.885721697</d>
<d>0.796146253</d>
<d>0.717588974</d>
<d>0.782407657</d>
<d>0.823106311</d>
<d>0.954530907</d>
<d>0.813081987</d>
<d>0.333830754</d>
<d>0.337033249</d>
<d>0.335079895</d>
<d>0.358293791</d>
<d>0.377751882</d>
<d>0.401292735</d>
<d>0.410363676</d>
<d>0.412560152</d>
<d>0.388843245</d>
<d>0.398065089</d>
<d>0.375127848</d>
<d>0.372705018</d>
<d>0.41056488</d>
<d>0.454896799</d>
<d>0.419543603</d>
<d>0.489369729</d>
<d>0.433921296</d>
<d>0.39499673</d>
<d>0.415024899</d>
<d>0.380032193</d>
<d>0.409709763</d>
<d>0.417221375</d>
<d>0.410992438</d>
<d>0.379160309</d>
<d>0.377399775</d>
<d>0.36604014</d>
<d>0.371296591</d>
<d>0.368865378</d>
<d>0.367021009</d>
<d>0.430115189</d>
<d>0.438263946</d>
<d>0.377206955</d>
<d>0.382974799</d>
<d>0.411118191</d>
<d>0.435857883</d>
<d>0.426091112</d>
<d>0.422544894</d>
<d>0.409324123</d>
<d>0.401854429</d>
<d>0.416072836</d>
<d>0.417405811</d>
<d>0.434625509</d>
<d>0.488162506</d>
<d>0.432973961</d>
<d>0.416844117</d>
<d>0.472862628</d>
<d>0.45391593</d>
<d>0.470230211</d>
<d>0.514788484</d>
<d>0.49081169</d>
<d>0.412090676</d>
<d>0.451342197</d>
<d>0.45600342</d>
<d>0.511183582</d>
<d>0.434600359</d>
<d>0.414463205</d>
<d>0.431104442</d>
<d>0.434038665</d>
<d>0.406926443</d>
<d>0.379889673</d>
<d>0.423383243</d>
<d>0.421438272</d>
<d>0.472443453</d>
<d>0.435354873</d>
<d>0.522040207</d>
<d>0.582711557</d>
<d>0.534179507</d>
<d>0.497225063</d>
<d>0.47644238</d>
<d>0.464361765</d>
<d>0.461846716</d>
<d>0.46986972</d>
<d>0.773251622</d>
<d>1</d>
<d>0.69705404</d>
<d>0.483007604</d>
<d>0.557295606</d>
<d>0.577354049</d>
<d>0.494956334</d>
<d>0.455226854</d>
<d>0.483227135</d>
<d>0.452725314</d>
<d>0.40891884</d>
<d>0.478375327</d>
<d>0.552124649</d>
<d>0.502907395</d>
<d>0.500044275</d>
<d>0.487942428</d>
<d>0.535737346</d>
<d>0.479236846</d>
<d>0.470427955</d>
<d>0.445314777</d>
<d>0.521371936</d>
<d>0.60316087</d>
<d>0.506943804</d>
<d>0.514500079</d>
<d>0.484228858</d>
<d>0.597390355</d>
<d>0.69593924</d>
<d>0.554231404</d>
<d>0.540620515</d>
<d>0.63724528</d>
<d>0.578014485</d>
<d>0.586268093</d>
<d>0.689013884</d>
<d>0.670246797</d>
<d>0.681389351</d>
<d>0.780696447</d>
<d>0.874712673</d>
<d>0.801321241</d>
<d>0.773582922</d>
<d>0.835394583</d>
<d>0.808003084</d>
<d>0.840917896</d>
<d>0.775269063</d>
<d>0.828061528</d>
<d>0.94645117</d>
<d>1</d>
<d>0.953791605</d>
</Subcolumn>
</YColumn>
</Table>
<Table ID="Table16" XFormat="numbers" YFormat="replicates" Replicates="5" TableType="XY" EVFormat="AsteriskAfterNumber">
<Title>4-cells</Title>
<RowTitlesColumn Width="84">
<Subcolumn></Subcolumn>
</RowTitlesColumn>
<SubColumnTitles OwnSet="0">
<Subcolumn>
<d>1</d>
</Subcolumn>
<Subcolumn>
<d>2</d>
</Subcolumn>
<Subcolumn>
<d>3</d>
</Subcolumn>
<Subcolumn>
<d>4</d>
</Subcolumn>
<Subcolumn>
<d>5</d>
</Subcolumn>
</SubColumnTitles>
<XColumn Width="51" Subcolumns="1" Decimals="15">
<Title></Title>
<Subcolumn></Subcolumn>
</XColumn>
<XAdvancedColumn Version="1" Width="51" Decimals="15" Subcolumns="1">
<Title></Title>
<Subcolumn></Subcolumn>
</XAdvancedColumn>
<YColumn Width="420" Decimals="9" Subcolumns="5">
<Title>Basal</Title>
<Subcolumn>
<d>0.139822179</d>
<d>0.156000428</d>
<d>0.102053741</d>
<d>0.144510335</d>
<d>0.142454126</d>
<d>0.143852348</d>
<d>0.16332053</d>
<d>0.15464333</d>
<d>0.106231957</d>
<d>0.115287499</d>
<d>0.159331485</d>
<d>0.132173083</d>
<d>0.103986577</d>
<d>0.097085941</d>
<d>0.115978385</d>
<d>0.103435513</d>
<d>0.096049612</d>
<d>0.1449956</d>
<d>0.141960636</d>
<d>0.126530847</d>
<d>0.142741995</d>
<d>0.15117245</d>
<d>0.159438408</d>
<d>0.139468511</d>
<d>0.164661178</d>
<d>0.208335047</d>
<d>0.207800433</d>
<d>0.268359886</d>
<d>0.261566173</d>
<d>0.320488884</d>
<d>0.254114473</d>
<d>0.22726039</d>
<d>0.278188563</d>
<d></d>
<d></d>
<d></d>
<d></d>
<d></d>
<d></d>
<d></d>
<d></d>
<d></d>
<d></d>
<d></d>
<d></d>
<d></d>
<d></d>
<d></d>
<d></d>
<d></d>
<d></d>
<d></d>
</Subcolumn>
<Subcolumn>
<d>0.148965378</d>
<d>0.434834522</d>
<d>0.61447531</d>
<d>0.675677162</d>
<d>0.748467375</d>
<d>0.604189823</d>
<d>0.547828199</d>
<d>0.573916621</d>
<d>0.61426905</d>
<d>0.628235127</d>
<d>0.514360262</d>
<d>0.483691729</d>
<d>0.582813291</d>
<d>0.535960242</d>
<d>0.558839033</d>
<d>0.711323431</d>
<d>0.702447387</d>
<d>0.714284405</d>
<d>0.750222875</d>
<d>0.669432075</d>
<d>0.546223957</d>
<d>0.485054189</d>
<d>0.557757315</d>
<d>0.60893036</d>
<d>0.591357029</d>
<d>0.502179478</d>
<d>0.513262502</d>
<d>0.416157702</d>
<d>0.541672492</d>
<d>0.617789216</d>
<d>0.602484743</d>
<d>0.525172857</d>
<d>0.610748883</d>
<d>0.62661255</d>
<d>0.580637251</d>
<d>0.552887293</d>
<d>0.564945467</d>
<d>0.533800244</d>
<d>0.577945561</d>
<d>0.561730107</d>
<d>0.59576182</d>
<d>0.768549054</d>
<d>0.722008833</d>
<d>0.671237994</d>
<d>0.654328132</d>
<d>0.566090209</d>
<d>0.590298229</d>
<d>0.643889096</d>
<d>0.641709618</d>
<d>0.597521904</d>
<d>0.617659731</d>
<d>0.603826577</d>
</Subcolumn>
<Subcolumn>
<d>0.381799332</d>
<d>0.54770289</d>
<d>0.491933755</d>
<d>0.509801964</d>
<d>0.444666998</d>
<d>0.478065628</d>
<d>0.535814246</d>
<d>0.423659224</d>
<d>0.461648257</d>
<d>0.486427034</d>
<d>0.526521837</d>
<d>0.486341863</d>
<d>0.503405356</d>
<d>0.498459587</d>
<d>0.483443125</d>
<d>0.497942689</d>
<d>0.422181954</d>
<d>0.403611822</d>
<d>0.342565045</d>
<d>0.393917056</d>
<d>0.432047061</d>
<d>0.505499379</d>
<d>0.463598371</d>
<d>0.380421918</d>
<d>0.379963758</d>
<d>0.350121735</d>
<d>0.475354853</d>
<d>0.355499232</d>
<d>0.332697001</d>
<d>0.250169607</d>
<d>0.325125627</d>
<d>0.262228592</d>
<d>0.176215076</d>
<d>0.178109388</d>
<d>0.182065417</d>
<d>0.095708282</d>
<d>0.159923993</d>
<d>0.166376401</d>
<d>0.243041707</d>
<d>0.218547812</d>
<d>0.200077535</d>
<d>0.159007674</d>
<d>0.139961761</d>
<d>0.104469108</d>
<d>0.087649379</d>
<d>0.107253306</d>
<d>0.071472835</d>
<d>0.085182368</d>
<d>0.069751801</d>
<d>0.068359702</d>
<d>0.088280816</d>
<d>0.03919317</d>
</Subcolumn>
<Subcolumn>
<d>0.265142476</d>
<d>0.214973732</d>
<d>0.232437152</d>
<d>0.245097705</d>
<d>0.180046892</d>
<d>0.10303626</d>
<d>0.169592703</d>
<d>0.187448155</d>
<d>0.153845134</d>
<d>0.169083251</d>
<d>0.172314201</d>
<d>0.14857448</d>
<d>0.147839657</d>
<d>0.11793348</d>
<d>0.162217955</d>
<d>0.189917768</d>
<d>0.201743122</d>
<d>0.151625513</d>
<d>0.107462246</d>
<d>0.136252931</d>
<d>0.187908367</d>
<d>0.170676</d>
<d>0.19645353</d>
<d></d>
<d></d>
<d></d>
<d></d>
<d></d>
<d></d>
<d></d>
<d></d>
<d></d>
<d></d>
<d></d>
<d></d>
<d></d>
<d></d>
<d></d>
<d></d>
<d></d>
<d></d>
<d></d>
<d></d>
<d></d>
<d></d>
<d></d>
<d></d>
<d></d>
<d></d>
<d></d>
<d></d>
<d></d>
</Subcolumn>
<Subcolumn>
<d>0.299903502</d>
<d>0.583499309</d>
<d>0.510622758</d>
<d>0.494450903</d>
<d>0.512801469</d>
<d>0.361020307</d>
<d>0.520059134</d>
<d>0.364952571</d>
<d>0.496784858</d>
<d>0.431478224</d>
<d>0.434699541</d>
<d>0.418846995</d>
<d>0.494424441</d>
<d>0.467912972</d>
<d>0.502578288</d>
<d>0.640625634</d>
<d>0.546805234</d>
<d>0.440835214</d>
<d>0.413187639</d>
<d>0.312021367</d>
<d>0.308508968</d>
<d>0.4086097</d>
<d>0.447660664</d>
<d>0.381360821</d>
<d>0.371081187</d>
<d>0.347967448</d>
<d>0.301043135</d>
<d>0.348461407</d>
<d>0.395742076</d>
<d>0.445474897</d>
<d>0.404793869</d>
<d>0.311541522</d>
<d>0.325679326</d>
<d>0.400254742</d>
<d>0.30899587</d>
<d>0.35536448</d>
<d>0.563176437</d>
<d></d>
<d></d>
<d></d>
<d></d>
<d></d>
<d></d>
<d></d>
<d></d>
<d></d>
<d></d>
<d></d>
<d></d>
<d></d>
<d></d>
<d></d>
</Subcolumn>
</YColumn>
<YColumn Width="420" Decimals="9" Subcolumns="5">
<Title>Apical</Title>
<Subcolumn>
<d>0.445300741</d>
<d>0.419211567</d>
<d>0.561624569</d>
<d>0.56009475</d>
<d>0.579710979</d>
<d>0.745688131</d>
<d>0.655601523</d>
<d>0.558071441</d>
<d>0.662822928</d>
<d>0.767525065</d>
<d>0.768380448</d>
<d>0.673071071</d>
<d>0.708108864</d>
<d>0.697827821</d>
<d>0.872934539</d>
<d>0.864948225</d>
<d>0.91079345</d>
<d>0.933000502</d>
<d>0.930483702</d>
<d>0.96581759</d>
<d>1</d>
<d>0.978829277</d>
<d>0.978960874</d>
<d></d>
<d></d>
<d></d>
<d></d>
<d></d>
<d></d>
<d></d>
<d></d>
<d></d>
<d></d>
<d></d>
<d></d>
<d></d>
<d></d>
<d></d>
<d></d>
<d></d>
<d></d>
<d></d>
<d></d>
<d></d>
<d></d>
<d></d>
<d></d>
<d></d>
<d></d>
<d></d>
<d></d>
</Subcolumn>
<Subcolumn>
<d>0.301559782</d>
<d>0.285631946</d>
<d>0.313549203</d>
<d>0.42817577</d>
<d>0.477327469</d>
<d>0.424772484</d>
<d>0.33440321</d>
<d>0.313939951</d>
<d>0.301449777</d>
<d>0.372732002</d>
<d>0.375093676</d>
<d>0.353750375</d>
<d>0.336880619</d>
<d>0.326915981</d>
<d>0.38559459</d>
<d>0.42075844</d>
<d>0.369272568</d>
<d>0.309042428</d>
<d>0.320410778</d>
<d>0.312504154</d>
<d>0.298159934</d>
<d>0.331851319</d>
<d>0.395244108</d>
<d>0.413509556</d>
<d>0.439807674</d>
<d>0.462483642</d>
<d>0.414153544</d>
<d>0.403197714</d>
<d>0.355817556</d>
<d>0.387643436</d>
<d>0.453042675</d>
<d>0.456775977</d>
<d>0.458101769</d>
<d>0.550580621</d>
<d>0.57019134</d>
<d>0.554427366</d>
<d>0.600957274</d>
<d>0.7037812</d>
<d>0.760664202</d>
<d>0.972451718</d>
<d>0.770924479</d>
<d>0.752789663</d>
<d>0.895220045</d>
<d>0.948252865</d>
<d>0.951253945</d>
<d>0.996891207</d>
<d>0.993793873</d>
<d>1</d>
<d>0.992919561</d>
<d>0.961667771</d>
<d>0.964105073</d>
</Subcolumn>
<Subcolumn>
<d>0.509141157</d>
<d>0.467425175</d>
<d>0.540862808</d>
<d>0.508897393</d>
<d>0.491933755</d>
<d>0.523238363</d>
<d>0.511091271</d>
<d>0.460270843</d>
<d>0.51992552</d>
<d>0.483402008</d>
<d>0.470881927</d>
<d>0.507793112</d>
<d>0.524974082</d>
<d>0.556595877</d>
<d>0.577459742</d>
<d>0.571923652</d>
<d>0.617669086</d>
<d>0.538712984</d>
<d>0.607231279</d>
<d>0.617040585</d>
<d>0.800310139</d>
<d>0.75046183</d>
<d>0.701591516</d>
<d>0.622946727</d>
<d>0.664935843</d>
<d>0.62324923</d>
<d>0.591457093</d>
<d>0.657693403</d>
<d>0.637863333</d>
<d>0.688240287</d>
<d>0.616409148</d>
<d>0.64546114</d>
<d>0.731935752</d>
<d>0.784321557</d>
<d>0.733483508</d>
<d>0.705362518</d>
<d>0.686504568</d>
<d>0.805443871</d>
<d>0.775358084</d>
<d>0.815079899</d>
<d>0.827385585</d>
<d>0.811109186</d>
<d>0.846140743</d>
<d>0.935138167</d>
<d>0.92788398</d>
<d>1</d>
<d>0.83776759</d>
<d>0.844249368</d>
<d></d>
<d></d>
<d></d>
</Subcolumn>
<Subcolumn>
<d>0.286149336</d>
<d>0.233295077</d>
<d>0.307201648</d>
<d>0.390126852</d>
<d>0.418343693</d>
<d>0.449982766</d>
<d>0.523232163</d>
<d>0.660111966</d>
<d>0.630469037</d>
<d>0.508047074</d>
<d>0.564452348</d>
<d>0.545803363</d>
<d>0.60636948</d>
<d>0.66322739</d>
<d>0.645718517</d>
<d>0.670698726</d>
<d>0.856603373</d>
<d>1</d>
<d>0.881360105</d>
<d>0.892158979</d>
<d>0.914001038</d>
<d>0.702737407</d>
<d></d>
<d></d>
<d></d>
<d></d>
<d></d>
<d></d>
<d></d>
<d></d>
<d></d>
<d></d>
<d></d>
<d></d>
<d></d>
<d></d>
<d></d>
<d></d>
<d></d>
<d></d>
<d></d>
<d></d>
<d></d>
<d></d>
<d></d>
<d></d>
<d></d>
<d></d>
<d></d>
<d></d>
<d></d>
</Subcolumn>
<Subcolumn>
<d>0.433644586</d>
<d>0.413115309</d>
<d>0.516756667</d>
<d>0.584698923</d>
<d>0.523100508</d>
<d>0.582959483</d>
<d>0.699944782</d>
<d>0.674100157</d>
<d>0.405346045</d>
<d>0.415537471</d>
<d>0.610134269</d>
<d>0.655086275</d>
<d>0.429493569</d>
<d>0.500203758</d>
<d>0.49216458</d>
<d>0.466127664</d>
<d>0.527452637</d>
<d>0.516636706</d>
<d>0.55505258</d>
<d>0.69264125</d>
<d>0.587221641</d>
<d>0.435853287</d>
<d>0.511794146</d>
<d>0.42867148</d>
<d>0.377486773</d>
<d>0.507553158</d>
<d>0.527205658</d>
<d>0.683259563</d>
<d>0.679544288</d>
<d>0.781656138</d>
<d>1</d>
<d>0.835674051</d>
<d>0.804565237</d>
<d>0.760294188</d>
<d>0.766239334</d>
<d></d>
<d></d>
<d></d>
<d></d>
<d></d>
<d></d>
<d></d>
<d></d>
<d></d>
<d></d>
<d></d>
<d></d>
<d></d>
<d></d>
<d></d>
<d></d>
</Subcolumn>
</YColumn>
</Table>
<Table ID="Table48" XFormat="none" TableType="OneWay" EVFormat="AsteriskAfterNumber">
<Title>Copy of 4-cells</Title>
<RowTitlesColumn Width="84">
<Subcolumn></Subcolumn>
</RowTitlesColumn>
<SubColumnTitles OwnSet="0">
<Subcolumn></Subcolumn>
</SubColumnTitles>
<YColumn Width="84" Decimals="9" Subcolumns="1">
<Title>Basal</Title>
<Subcolumn>
<d>0.139822179</d>
<d>0.156000428</d>
<d>0.102053741</d>
<d>0.144510335</d>
<d>0.142454126</d>
<d>0.143852348</d>
<d>0.16332053</d>
<d>0.15464333</d>
<d>0.106231957</d>
<d>0.115287499</d>
<d>0.159331485</d>
<d>0.132173083</d>
<d>0.103986577</d>
<d>0.097085941</d>
<d>0.115978385</d>
<d>0.103435513</d>
<d>0.096049612</d>
<d>0.1449956</d>
<d>0.141960636</d>
<d>0.126530847</d>
<d>0.142741995</d>
<d>0.15117245</d>
<d>0.159438408</d>
<d>0.139468511</d>
<d>0.164661178</d>
<d>0.208335047</d>
<d>0.207800433</d>
<d>0.268359886</d>
<d>0.261566173</d>
<d>0.320488884</d>
<d>0.254114473</d>
<d>0.22726039</d>
<d>0.278188563</d>
<d>0.148965378</d>
<d>0.434834522</d>
<d>0.61447531</d>
<d>0.675677162</d>
<d>0.748467375</d>
<d>0.604189823</d>
<d>0.547828199</d>
<d>0.573916621</d>
<d>0.61426905</d>
<d>0.628235127</d>
<d>0.514360262</d>
<d>0.483691729</d>
<d>0.582813291</d>
<d>0.535960242</d>
<d>0.558839033</d>
<d>0.711323431</d>
<d>0.702447387</d>
<d>0.714284405</d>
<d>0.750222875</d>
<d>0.669432075</d>
<d>0.546223957</d>
<d>0.485054189</d>
<d>0.557757315</d>
<d>0.60893036</d>
<d>0.591357029</d>
<d>0.502179478</d>
<d>0.513262502</d>
<d>0.416157702</d>
<d>0.541672492</d>
<d>0.617789216</d>
<d>0.602484743</d>
<d>0.525172857</d>
<d>0.610748883</d>
<d>0.62661255</d>
<d>0.580637251</d>
<d>0.552887293</d>
<d>0.564945467</d>
<d>0.533800244</d>
<d>0.577945561</d>
<d>0.561730107</d>
<d>0.59576182</d>
<d>0.768549054</d>
<d>0.722008833</d>
<d>0.671237994</d>
<d>0.654328132</d>
<d>0.566090209</d>
<d>0.590298229</d>
<d>0.643889096</d>
<d>0.641709618</d>
<d>0.597521904</d>
<d>0.617659731</d>
<d>0.603826577</d>
<d>0.381799332</d>
<d>0.54770289</d>
<d>0.491933755</d>
<d>0.509801964</d>
<d>0.444666998</d>
<d>0.478065628</d>
<d>0.535814246</d>
<d>0.423659224</d>
<d>0.461648257</d>
<d>0.486427034</d>
<d>0.526521837</d>
<d>0.486341863</d>
<d>0.503405356</d>
<d>0.498459587</d>
<d>0.483443125</d>
<d>0.497942689</d>
<d>0.422181954</d>
<d>0.403611822</d>
<d>0.342565045</d>
<d>0.393917056</d>
<d>0.432047061</d>
<d>0.505499379</d>
<d>0.463598371</d>
<d>0.380421918</d>
<d>0.379963758</d>
<d>0.350121735</d>
<d>0.475354853</d>
<d>0.355499232</d>
<d>0.332697001</d>
<d>0.250169607</d>
<d>0.325125627</d>
<d>0.262228592</d>
<d>0.176215076</d>
<d>0.178109388</d>
<d>0.182065417</d>
<d>0.095708282</d>
<d>0.159923993</d>
<d>0.166376401</d>
<d>0.243041707</d>
<d>0.218547812</d>
<d>0.200077535</d>
<d>0.159007674</d>
<d>0.139961761</d>
<d>0.104469108</d>
<d>0.087649379</d>
<d>0.107253306</d>
<d>0.071472835</d>
<d>0.085182368</d>
<d>0.069751801</d>
<d>0.068359702</d>
<d>0.088280816</d>
<d>0.03919317</d>
<d>0.265142476</d>
<d>0.214973732</d>
<d>0.232437152</d>
<d>0.245097705</d>
<d>0.180046892</d>
<d>0.10303626</d>
<d>0.169592703</d>
<d>0.187448155</d>
<d>0.153845134</d>
<d>0.169083251</d>
<d>0.172314201</d>
<d>0.14857448</d>
<d>0.147839657</d>
<d>0.11793348</d>
<d>0.162217955</d>
<d>0.189917768</d>
<d>0.201743122</d>
<d>0.151625513</d>
<d>0.107462246</d>
<d>0.136252931</d>
<d>0.187908367</d>
<d>0.170676</d>
<d>0.19645353</d>
<d>0.299903502</d>
<d>0.583499309</d>
<d>0.510622758</d>
<d>0.494450903</d>
<d>0.512801469</d>
<d>0.361020307</d>
<d>0.520059134</d>
<d>0.364952571</d>
<d>0.496784858</d>
<d>0.431478224</d>
<d>0.434699541</d>
<d>0.418846995</d>
<d>0.494424441</d>
<d>0.467912972</d>
<d>0.502578288</d>
<d>0.640625634</d>
<d>0.546805234</d>
<d>0.440835214</d>
<d>0.413187639</d>
<d>0.312021367</d>
<d>0.308508968</d>
<d>0.4086097</d>
<d>0.447660664</d>
<d>0.381360821</d>
<d>0.371081187</d>
<d>0.347967448</d>
<d>0.301043135</d>
<d>0.348461407</d>
<d>0.395742076</d>
<d>0.445474897</d>
<d>0.404793869</d>
<d>0.311541522</d>
<d>0.325679326</d>
<d>0.400254742</d>
<d>0.30899587</d>
<d>0.35536448</d>
<d>0.563176437</d>
</Subcolumn>
</YColumn>
<YColumn Width="84" Decimals="9" Subcolumns="1">
<Title>Apical</Title>
<Subcolumn>
<d>0.445300741</d>
<d>0.419211567</d>
<d>0.561624569</d>
<d>0.56009475</d>
<d>0.579710979</d>
<d>0.745688131</d>
<d>0.655601523</d>
<d>0.558071441</d>
<d>0.662822928</d>
<d>0.767525065</d>
<d>0.768380448</d>
<d>0.673071071</d>
<d>0.708108864</d>
<d>0.697827821</d>
<d>0.872934539</d>
<d>0.864948225</d>
<d>0.91079345</d>
<d>0.933000502</d>
<d>0.930483702</d>
<d>0.96581759</d>
<d>1</d>
<d>0.978829277</d>
<d>0.978960874</d>
<d>0.301559782</d>
<d>0.285631946</d>
<d>0.313549203</d>
<d>0.42817577</d>
<d>0.477327469</d>
<d>0.424772484</d>
<d>0.33440321</d>
<d>0.313939951</d>
<d>0.301449777</d>
<d>0.372732002</d>
<d>0.375093676</d>
<d>0.353750375</d>
<d>0.336880619</d>
<d>0.326915981</d>
<d>0.38559459</d>
<d>0.42075844</d>
<d>0.369272568</d>
<d>0.309042428</d>
<d>0.320410778</d>
<d>0.312504154</d>
<d>0.298159934</d>
<d>0.331851319</d>
<d>0.395244108</d>
<d>0.413509556</d>
<d>0.439807674</d>
<d>0.462483642</d>
<d>0.414153544</d>
<d>0.403197714</d>
<d>0.355817556</d>
<d>0.387643436</d>
<d>0.453042675</d>
<d>0.456775977</d>
<d>0.458101769</d>
<d>0.550580621</d>
<d>0.57019134</d>
<d>0.554427366</d>
<d>0.600957274</d>
<d>0.7037812</d>
<d>0.760664202</d>
<d>0.972451718</d>
<d>0.770924479</d>
<d>0.752789663</d>
<d>0.895220045</d>
<d>0.948252865</d>
<d>0.951253945</d>
<d>0.996891207</d>
<d>0.993793873</d>
<d>1</d>
<d>0.992919561</d>
<d>0.961667771</d>
<d>0.964105073</d>
<d>0.509141157</d>
<d>0.467425175</d>
<d>0.540862808</d>
<d>0.508897393</d>
<d>0.491933755</d>
<d>0.523238363</d>
<d>0.511091271</d>
<d>0.460270843</d>
<d>0.51992552</d>
<d>0.483402008</d>
<d>0.470881927</d>
<d>0.507793112</d>
<d>0.524974082</d>
<d>0.556595877</d>
<d>0.577459742</d>
<d>0.571923652</d>
<d>0.617669086</d>
<d>0.538712984</d>
<d>0.607231279</d>
<d>0.617040585</d>
<d>0.800310139</d>
<d>0.75046183</d>
<d>0.701591516</d>
<d>0.622946727</d>
<d>0.664935843</d>
<d>0.62324923</d>
<d>0.591457093</d>
<d>0.657693403</d>
<d>0.637863333</d>
<d>0.688240287</d>
<d>0.616409148</d>
<d>0.64546114</d>
<d>0.731935752</d>
<d>0.784321557</d>
<d>0.733483508</d>
<d>0.705362518</d>
<d>0.686504568</d>
<d>0.805443871</d>
<d>0.775358084</d>
<d>0.815079899</d>
<d>0.827385585</d>
<d>0.811109186</d>
<d>0.846140743</d>
<d>0.935138167</d>
<d>0.92788398</d>
<d>1</d>
<d>0.83776759</d>
<d>0.844249368</d>
<d>0.286149336</d>
<d>0.233295077</d>
<d>0.307201648</d>
<d>0.390126852</d>
<d>0.418343693</d>
<d>0.449982766</d>
<d>0.523232163</d>
<d>0.660111966</d>
<d>0.630469037</d>
<d>0.508047074</d>
<d>0.564452348</d>
<d>0.545803363</d>
<d>0.60636948</d>
<d>0.66322739</d>
<d>0.645718517</d>
<d>0.670698726</d>
<d>0.856603373</d>
<d>1</d>
<d>0.881360105</d>
<d>0.892158979</d>
<d>0.914001038</d>
<d>0.702737407</d>
<d>0.433644586</d>
<d>0.413115309</d>
<d>0.516756667</d>
<d>0.584698923</d>
<d>0.523100508</d>
<d>0.582959483</d>
<d>0.699944782</d>
<d>0.674100157</d>
<d>0.405346045</d>
<d>0.415537471</d>
<d>0.610134269</d>
<d>0.655086275</d>
<d>0.429493569</d>
<d>0.500203758</d>
<d>0.49216458</d>
<d>0.466127664</d>
<d>0.527452637</d>
<d>0.516636706</d>
<d>0.55505258</d>
<d>0.69264125</d>
<d>0.587221641</d>
<d>0.435853287</d>
<d>0.511794146</d>
<d>0.42867148</d>
<d>0.377486773</d>
<d>0.507553158</d>
<d>0.527205658</d>
<d>0.683259563</d>
<d>0.679544288</d>
<d>0.781656138</d>
<d>1</d>
<d>0.835674051</d>
<d>0.804565237</d>
<d>0.760294188</d>
<d>0.766239334</d>
</Subcolumn>
</YColumn>
</Table>
<Table ID="Table17" XFormat="none" YFormat="replicates" Replicates="12" TableType="TwoWay" EVFormat="AsteriskAfterNumber">
<Title>8-cell</Title>
<RowTitlesColumn Width="84">
<Subcolumn></Subcolumn>
</RowTitlesColumn>
<SubColumnTitles OwnSet="0">
<Subcolumn>
<d>1</d>
</Subcolumn>
<Subcolumn>
<d>2</d>
</Subcolumn>
<Subcolumn>
<d>3</d>
</Subcolumn>
<Subcolumn>
<d>4</d>
</Subcolumn>
<Subcolumn>
<d>5</d>
</Subcolumn>
<Subcolumn>
<d>6</d>
</Subcolumn>
<Subcolumn>
<d>7</d>
</Subcolumn>
<Subcolumn>
<d>8</d>
</Subcolumn>
<Subcolumn>
<d>9</d>
</Subcolumn>
<Subcolumn>
<d>10</d>
</Subcolumn>
<Subcolumn>
<d>11</d>
</Subcolumn>
<Subcolumn>
<d>12</d>
</Subcolumn>
</SubColumnTitles>
<YColumn Width="1008" Decimals="9" Subcolumns="12">
<Title>Basal</Title>
<Subcolumn>
<d>0.284355657</d>
<d>0.546191638</d>
<d>0.612936373</d>
<d>0.687444017</d>
<d>0.614283185</d>
<d>0.584206111</d>
<d>0.646221495</d>
<d>0.602419091</d>
<d>0.537737227</d>
<d>0.516370484</d>
<d>0.539579076</d>
<d>0.460803512</d>
<d>0.440806846</d>
<d>0.538992269</d>
<d>0.47579681</d>
<d>0.487752673</d>
<d>0.483911286</d>
<d>0.463844825</d>
<d>0.429741534</d>
<d>0.439546634</d>
<d>0.452903594</d>
<d>0.434251156</d>
<d>0.478399957</d>
<d>0.442116175</d>
<d>0.424201768</d>
<d>0.433028427</d>
<d>0.415169599</d>
<d>0.403324893</d>
<d>0.364889056</d>
<d>0.410648344</d>
<d></d>
<d></d>
<d></d>
<d></d>
<d></d>
<d></d>
<d></d>
<d></d>
<d></d>
</Subcolumn>
<Subcolumn>
<d>0.225409924</d>
<d>0.425306665</d>
<d>0.49893628</d>
<d>0.529937658</d>
<d>0.58912279</d>
<d>0.506984488</d>
<d>0.491359286</d>
<d>0.460339661</d>
<d>0.490870898</d>
<d>0.462722565</d>
<d>0.432013147</d>
<d>0.450051308</d>
<d>0.463404162</d>
<d>0.438016564</d>
<d>0.505270299</d>
<d>0.490566058</d>
<d>0.448870589</d>
<d>0.443044279</d>
<d>0.511425063</d>
<d>0.377361974</d>
<d>0.359213255</d>
<d>0.486257508</d>
<d>0.418960839</d>
<d>0.374871731</d>
<d>0.362393682</d>
<d>0.394371836</d>
<d>0.38127874</d>
<d></d>
<d></d>
<d></d>
<d></d>
<d></d>
<d></d>
<d></d>
<d></d>
<d></d>
<d></d>
<d></d>
<d></d>
</Subcolumn>
<Subcolumn>
<d>0.327241193</d>
<d>0.304712273</d>
<d>0.408755338</d>
<d>0.453302682</d>
<d>0.471868711</d>
<d>0.349583586</d>
<d>0.469707283</d>
<d>0.408040316</d>
<d>0.410157567</d>
<d>0.379038565</d>
<d>0.406503919</d>
<d>0.422370208</d>
<d>0.386021892</d>
<d>0.372526466</d>
<d>0.352438765</d>
<d>0.402830636</d>
<d>0.396053471</d>
<d>0.409141483</d>
<d>0.475690888</d>
<d>0.400818103</d>
<d></d>
<d></d>
<d></d>
<d></d>
<d></d>
<d></d>
<d></d>
<d></d>
<d></d>
<d></d>
<d></d>
<d></d>
<d></d>
<d></d>
<d></d>
<d></d>
<d></d>
<d></d>
<d></d>
</Subcolumn>
<Subcolumn>
<d>0.414204451</d>
<d>0.401803421</d>
<d>0.372751372</d>
<d>0.401207218</d>
<d>0.501316668</d>
<d>0.534070199</d>
<d>0.511427022</d>
<d>0.448980053</d>
<d>0.485988593</d>
<d>0.663296967</d>
<d>0.638737153</d>
<d>0.535386867</d>
<d>0.534210777</d>
<d>0.514923912</d>
<d>0.562214764</d>
<d>0.595823062</d>
<d>0.585243276</d>
<d>0.597663134</d>
<d>0.578811811</d>
<d>0.605199144</d>
<d>0.637879876</d>
<d>0.644453175</d>
<d>0.633545791</d>
<d>0.673434935</d>
<d>0.673652078</d>
<d>0.58245932</d>
<d>0.489263319</d>
<d>0.47409967</d>
<d>0.494273937</d>
<d>0.501808693</d>
<d>0.44009474</d>
<d>0.381858849</d>
<d>0.401246128</d>
<d>0.417534404</d>
<d>0.435830944</d>
<d>0.455179313</d>
<d>0.482258243</d>
<d>0.50578129</d>
<d>0.516113808</d>
</Subcolumn>
<Subcolumn>
<d>0.293008094</d>
<d>0.397456323</d>
<d>0.511225873</d>
<d>0.546725635</d>
<d>0.584889939</d>
<d>0.561101344</d>
<d>0.544216753</d>
<d>0.46962788</d>
<d>0.437058199</d>
<d>0.342627184</d>
<d>0.367917445</d>
<d>0.424001026</d>
<d>0.402931912</d>
<d>0.371433542</d>
<d>0.399782075</d>
<d>0.427425558</d>
<d>0.363732923</d>
<d>0.389700765</d>
<d>0.339147713</d>
<d>0.348395781</d>
<d>0.334715965</d>
<d>0.289601875</d>
<d>0.315807787</d>
<d>0.33331502</d>
<d>0.31168736</d>
<d>0.277670952</d>
<d>0.282349925</d>
<d>0.277680108</d>
<d>0.232245541</d>
<d>0.204483024</d>
<d>0.217988866</d>
<d></d>
<d></d>
<d></d>
<d></d>
<d></d>
<d></d>
<d></d>
<d></d>
</Subcolumn>
<Subcolumn>
<d>0.178519442</d>
<d>0.3052655</d>
<d>0.493383795</d>
<d>0.47056489</d>
<d>0.457947686</d>
<d>0.495395572</d>
<d>0.319497619</d>
<d>0.409772154</d>
<d>0.46620215</d>
<d>0.618736027</d>
<d>0.557675512</d>
<d>0.533156553</d>
<d>0.510384339</d>
<d>0.361115994</d>
<d>0.417485567</d>
<d>0.425556019</d>
<d>0.355360802</d>
<d>0.396553476</d>
<d>0.336358094</d>
<d>0.286967257</d>
<d>0.415999736</d>
<d>0.422279501</d>
<d>0.367012628</d>
<d>0.41119619</d>
<d>0.408311041</d>
<d>0.400712979</d>
<d>0.402580567</d>
<d>0.477211307</d>
<d>0.397805859</d>
<d>0.239172109</d>
<d>0.249751446</d>
<d>0.170663213</d>
<d>0.194626016</d>
<d>0.21689151</d>
<d>0.145585352</d>
<d>0.110717758</d>
<d>0.219507506</d>
<d>0.187661011</d>
<d></d>
</Subcolumn>
<Subcolumn>
<d>0.231660232</d>
<d>0.184413127</d>
<d>0.135245174</d>
<d>0.121359073</d>
<d>0.117005792</d>
<d>0.275048263</d>
<d>0.440368726</d>
<d>0.422380309</d>
<d>0.292758687</d>
<d>0.294164093</d>
<d>0.322557915</d>
<d>0.333245174</d>
<d>0.240708494</d>
<d>0.187870656</d>
<d>0.151745174</d>
<d>0.152889961</d>
<d>0.05680695</d>
<d>0.020714286</d>
<d>0.028619691</d>
<d>0.031745174</d>
<d>0.013594595</d>
<d>0.000407336</d>
<d>0.006749035</d>
<d>0.003637066</d>
<d>0.03484556</d>
<d>0.003874517</d>
<d></d>
<d></d>
<d></d>
<d></d>
<d></d>
<d></d>
<d></d>
<d></d>
<d></d>
<d></d>
<d></d>
<d></d>
<d></d>
</Subcolumn>
<Subcolumn>
<d>0.572802128</d>
<d>0.610230655</d>
<d>0.531292385</d>
<d>0.31489797</d>
<d>0.568810924</d>
<d>0.506281389</d>
<d>0.594627934</d>
<d>0.516479313</d>
<d>0.451294431</d>
<d>0.512563801</d>
<d>0.334252544</d>
<d>0.204304199</d>
<d>0.201436097</d>
<d>0.247669411</d>
<d>0.307255153</d>
<d>0.356708433</d>
<d>0.322593975</d>
<d>0.282000716</d>
<d>0.255547486</d>
<d>0.270966092</d>
<d>0.313304352</d>
<d>0.241380862</d>
<d>0.189491127</d>
<d>0.139403672</d>
<d>0.201763412</d>
<d>0.181128216</d>
<d>0.06896333</d>
<d>0.078269319</d>
<d></d>
<d></d>
<d></d>
<d></d>
<d></d>
<d></d>
<d></d>
<d></d>
<d></d>
<d></d>
<d></d>
</Subcolumn>
<Subcolumn>
<d>0.528257057</d>
<d>0.630430189</d>
<d>0.604849635</d>
<d>0.616875113</d>
<d>0.614880649</d>
<d>0.55258036</d>
<d>0.569509237</d>
<d>0.58868849</d>
<d>0.569620758</d>
<d>0.603578296</d>
<d>0.547376441</d>
<d>0.502708198</d>
<d>0.590241566</d>
<d>0.602284653</d>
<d>0.625781527</d>
<d>0.620392131</d>
<d>0.64584473</d>
<d>0.580535723</d>
<d>0.580873808</d>
<d></d>
<d></d>
<d></d>
<d></d>
<d></d>
<d></d>
<d></d>
<d></d>
<d></d>
<d></d>
<d></d>
<d></d>
<d></d>
<d></d>
<d></d>
<d></d>
<d></d>
<d></d>
<d></d>
<d></d>
</Subcolumn>
<Subcolumn>
<d>0.641975309</d>
<d>0.603559259</d>
<d>0.635197531</d>
<d>0.559344444</d>
<d>0.548298765</d>
<d>0.595867901</d>
<d>0.63538642</d>
<d>0.593209877</d>
<d>0.506828395</d>
<d>0.554339506</d>
<d>0.570483951</d>
<d>0.680187654</d>
<d>0.70672716</d>
<d>0.561395062</d>
<d>0.591975309</d>
<d>0.64622716</d>
<d>0.545577778</d>
<d>0.760938272</d>
<d>0.825308642</d>
<d>0.606988889</d>
<d>0.6193</d>
<d>0.696604938</d>
<d>0.753388889</d>
<d>0.621655556</d>
<d>0.631745679</d>
<d>0.651171605</d>
<d>0.594117284</d>
<d>0.496517284</d>
<d></d>
<d></d>
<d></d>
<d></d>
<d></d>
<d></d>
<d></d>
<d></d>
<d></d>
<d></d>
<d></d>
</Subcolumn>
<Subcolumn>
<d>0.378181702</d>
<d>0.37655154</d>
<d>0.391676818</d>
<d>0.316102181</d>
<d>0.380614008</d>
<d>0.303309687</d>
<d>0.292191145</d>
<d>0.308492767</d>
<d>0.314553626</d>
<d>0.364013822</d>
<d>0.390183995</d>
<d>0.378894276</d>
<d>0.355624159</d>
<d>0.360050875</d>
<d>0.415928217</d>
<d>0.436624708</d>
<d>0.53809285</d>
<d>0.305178701</d>
<d>0.438784325</d>
<d>0.459383285</d>
<d>0.466079092</d>
<d>0.343795033</d>
<d>0.313687789</d>
<d>0.267678999</d>
<d>0.244434758</d>
<d>0.288938782</d>
<d>0.275861657</d>
<d></d>
<d></d>
<d></d>
<d></d>
<d></d>
<d></d>
<d></d>
<d></d>
<d></d>
<d></d>
<d></d>
<d></d>
</Subcolumn>
<Subcolumn>
<d>0.26915908</d>
<d>0.215948012</d>
<d>0.263950852</d>
<d>0.249421308</d>
<d>0.300287327</d>
<d>0.370016351</d>
<d>0.416074517</d>
<d>0.330732584</d>
<d>0.259987484</d>
<d>0.380271312</d>
<d>0.411214513</d>
<d>0.37987262</d>
<d>0.285308625</d>
<d>0.355486808</d>
<d>0.338205113</d>
<d>0.278271797</d>
<d>0.272848241</d>
<d>0.254015517</d>
<d>0.351925497</d>
<d>0.34758026</d>
<d>0.359502325</d>
<d>0.352711105</d>
<d>0.383639165</d>
<d>0.343436892</d>
<d>0.300112374</d>
<d>0.254516826</d>
<d>0.266368237</d>
<d>0.303813311</d>
<d>0.289221525</d>
<d>0.333281184</d>
<d>0.311215186</d>
<d>0.336664177</d>
<d>0.304822658</d>
<d>0.275607122</d>
<d>0.225432505</d>
<d>0.241899994</d>
<d>0.244934763</d>
<d></d>
<d></d>
</Subcolumn>
</YColumn>
<YColumn Width="1008" Decimals="9" Subcolumns="12">
<Title>Apical</Title>
<Subcolumn>
<d>0.545441973</d>
<d>0.483202982</d>
<d>0.479935477</d>
<d>0.538426143</d>
<d>0.545049045</d>
<d>0.63919274</d>
<d>0.626753473</d>
<d>0.566577353</d>
<d>0.59581687</d>
<d>0.648497633</d>
<d>0.69548482</d>
<d>0.737225645</d>
<d>0.786574277</d>
<d>0.775524475</d>
<d>0.781152132</d>
<d>0.857541694</d>
<d>0.94509997</d>
<d>0.833628675</d>
<d>0.865609639</d>
<d>0.880675319</d>
<d>0.818323879</d>
<d>0.881487025</d>
<d>0.897703053</d>
<d>1</d>
<d>0.957998084</d>
<d></d>
<d></d>
<d></d>
<d></d>
<d></d>
<d></d>
<d></d>
<d></d>
<d></d>
<d></d>
<d></d>
<d></d>
<d></d>
</Subcolumn>
<Subcolumn>
<d>0.523691656</d>
<d>0.499548107</d>
<d>0.444406399</d>
<d>0.500037568</d>
<d>0.696518812</d>
<d>0.762208631</d>
<d>0.644009034</d>
<d>0.706355272</d>
<d>0.603348303</d>
<d>0.595475057</d>
<d>0.539035632</d>
<d>0.576819702</d>
<d>0.637930479</d>
<d>0.71645793</d>
<d>0.723358694</d>
<d>0.740443693</d>
<d>0.760655449</d>
<d>0.803880486</d>
<d>0.828018668</d>
<d>0.881524544</d>
<d>0.98948731</d>
<d>1</d>
<d>0.941224899</d>
<d></d>
<d></d>
<d></d>
<d></d>
<d></d>
<d></d>
<d></d>
<d></d>
<d></d>
<d></d>
<d></d>
<d></d>
<d></d>
<d></d>
<d></d>
</Subcolumn>
<Subcolumn>
<d>0.913645958</d>
<d>0.750524404</d>
<d>0.842143757</d>
<d>0.842225567</d>
<d>0.886658377</d>
<d>0.770800268</d>
<d>0.769653288</d>
<d>0.745571609</d>
<d>0.781186904</d>
<d>0.865338613</d>
<d>1</d>
<d>0.933115173</d>
<d>0.767972904</d>
<d>0.802567207</d>
<d>0.863447159</d>
<d>0.9602811</d>
<d>0.949110722</d>
<d>0.842505359</d>
<d></d>
<d></d>
<d></d>
<d></d>
<d></d>
<d></d>
<d></d>
<d></d>
<d></d>
<d></d>
<d></d>
<d></d>
<d></d>
<d></d>
<d></d>
<d></d>
<d></d>
<d></d>
<d></d>
<d></d>
</Subcolumn>
<Subcolumn>
<d>0.402142316</d>
<d>0.399762523</d>
<d>0.452486984</d>
<d>0.493975208</d>
<d>0.472928601</d>
<d>0.445414129</d>
<d>0.450645657</d>
<d>0.459371564</d>
<d>0.468378628</d>
<d>0.436767297</d>
<d>0.508530101</d>
<d>0.600832425</d>
<d>0.535145875</d>
<d>0.55039864</d>
<d>0.582839635</d>
<d>0.584800203</d>
<d>0.627951521</d>
<d>0.65552373</d>
<d>0.683149912</d>
<d>0.66461489</d>
<d>0.710110856</d>
<d>0.642840288</d>
<d>0.640319916</d>
<d>0.694735085</d>
<d>0.71797572</d>
<d>0.712933722</d>
<d>0.774141844</d>
<d>0.735824166</d>
<d>0.700934345</d>
<d>0.830934295</d>
<d>0.809172244</d>
<d>0.845927241</d>
<d>0.879318395</d>
<d>0.859096432</d>
<d>0.895567761</d>
<d>0.941536924</d>
<d>1</d>
<d>0.886492918</d>
</Subcolumn>
<Subcolumn>
<d>0.303281691</d>
<d>0.311183753</d>
<d>0.327592206</d>
<d>0.335256199</d>
<d>0.346601106</d>
<d>0.355711827</d>
<d>0.355199062</d>
<d>0.330128557</d>
<d>0.362524265</d>
<d>0.356499286</d>
<d>0.36444713</d>
<d>0.398188844</d>
<d>0.416721606</d>
<d>0.394993224</d>
<d>0.414780427</d>
<d>0.411877816</d>
<d>0.445115921</d>
<d>0.601710435</d>
<d>0.498635681</d>
<d>0.503983079</d>
<d>0.514458118</d>
<d>0.637127788</d>
<d>0.713721935</d>
<d>0.812511446</d>
<d>0.852333077</d>
<d>1</d>
<d>0.806065268</d>
<d>0.60311138</d>
<d></d>
<d></d>
<d></d>
<d></d>
<d></d>
<d></d>
<d></d>
<d></d>
<d></d>
<d></d>
</Subcolumn>
<Subcolumn>
<d>0.411087705</d>
<d>0.371093857</d>
<d>0.377878969</d>
<d>0.563173911</d>
<d>0.585870598</d>
<d>0.473386871</d>
<d>0.507404437</d>
<d>0.479146183</d>
<d>0.557947411</d>
<d>0.621125441</d>
<d>0.522942495</d>
<d>0.520028508</d>
<d>0.588737895</d>
<d>0.675902072</d>
<d>0.366979671</d>
<d>0.491009486</d>
<d>0.598283192</d>
<d>0.525392331</d>
<d>0.652606659</d>
<d>0.54978358</d>
<d>0.378314282</d>
<d>0.562605395</d>
<d>0.693677116</d>
<d>0.680432347</d>
<d>0.534341648</d>
<d>0.544787782</d>
<d>0.718926631</d>
<d>1</d>
<d>0.65301176</d>
<d>0.765616332</d>
<d>0.93981011</d>
<d>0.783811582</d>
<d>0.940936156</d>
<d>0.889935898</d>
<d>0.686606373</d>
<d>0.652711024</d>
<d>0.67691414</d>
<d></d>
</Subcolumn>
<Subcolumn>
<d>0.486467181</d>
<d>0.575673745</d>
<d>0.714623552</d>
<d>0.266312741</d>
<d>0.585332046</d>
<d>0.614583012</d>
<d>0.40434749</d>
<d>0.414646718</d>
<d>0.490694981</d>
<d>0.477907336</d>
<d>0.503202703</d>
<d>0.752519305</d>
<d>0.585934363</d>
<d>0.752681467</d>
<d>0.632934363</d>
<d>0.627708494</d>
<d>0.619086873</d>
<d>0.505635135</d>
<d>0.560171815</d>
<d>0.684521236</d>
<d>0.778631274</d>
<d>0.891474903</d>
<d>1</d>
<d>0.910864865</d>
<d>0.808766409</d>
<d>0.68507722</d>
<d>0.560629344</d>
<d>0.801328185</d>
<d>0.714285714</d>
<d></d>
<d></d>
<d></d>
<d></d>
<d></d>
<d></d>
<d></d>
<d></d>
<d></d>
</Subcolumn>
<Subcolumn>
<d>0.691314888</d>
<d>0.282839462</d>
<d>0.40303176</d>
<d>0.530431136</d>
<d>0.491233059</d>
<d>0.534731243</d>
<d>0.644596737</d>
<d>0.554143098</d>
<d>0.547085358</d>
<d>0.610834143</d>
<d>0.573996829</d>
<d>0.629098348</d>
<d>0.873308444</d>
<d>0.763888917</d>
<d>0.72682862</d>
<d>0.459145911</d>
<d>0.4406935</d>
<d>0.536416918</d>
<d>0.753600982</d>
<d>0.704751189</d>
<d>0.822867079</d>
<d>0.800783511</d>
<d>1</d>
<d>0.854833529</d>
<d>0.51757582</d>
<d>0.620882729</d>
<d>0.708766941</d>
<d>0.593259346</d>
<d></d>
<d></d>
<d></d>
<d></d>
<d></d>
<d></d>
<d></d>
<d></d>
<d></d>
<d></d>
</Subcolumn>
<Subcolumn>
<d>0.767464765</d>
<d>0.760130209</d>
<d>0.721047405</d>
<d>0.709176882</d>
<d>0.701008854</d>
<d>0.734528525</d>
<d>0.726563582</d>
<d>0.701116853</d>
<d>0.852866323</d>
<d>0.645011258</d>
<d>0.718380293</d>
<d>0.800269528</d>
<d>0.96166732</d>
<d>0.998295491</d>
<d>1</d>
<d>0.848326834</d>
<d>0.819167044</d>
<d>0.744899972</d>
<d>0.880428428</d>
<d></d>
<d></d>
<d></d>
<d></d>
<d></d>
<d></d>
<d></d>
<d></d>
<d></d>
<d></d>
<d></d>
<d></d>
<d></d>
<d></d>
<d></d>
<d></d>
<d></d>
<d></d>
<d></d>
</Subcolumn>
<Subcolumn>
<d>0.674307407</d>
<d>0.722020988</d>
<d>0.712601235</d>
<d>0.576669136</d>
<d>0.529324691</d>
<d>0.576630864</d>
<d>0.669290123</d>
<d>0.706475309</d>
<d>0.68778642</d>
<d>0.728041975</d>
<d>0.748601235</d>
<d>0.781708642</d>
<d>0.940555556</d>
<d>0.789506173</d>
<d>0.811558025</d>
<d>0.807911111</d>
<d>0.869683951</d>
<d>0.844923457</d>
<d>0.90684321</d>
<d>0.82408642</d>
<d>0.710185185</d>
<d>0.680222222</d>
<d>0.871503704</d>
<d>1</d>
<d>0.864593827</d>
<d>0.763604938</d>
<d>0.755096296</d>
<d>0.777777778</d>
<d></d>
<d></d>
<d></d>
<d></d>
<d></d>
<d></d>
<d></d>
<d></d>
<d></d>
<d></d>
</Subcolumn>
<Subcolumn>
<d>0.70917429</d>
<d>0.676662606</d>
<d>0.590801427</d>
<d>0.613235563</d>
<d>0.601927931</d>
<d>0.604051719</d>
<d>0.561569972</d>
<d>0.58655982</d>
<d>0.571583825</d>
<d>0.645548204</d>
<d>0.607704158</d>
<d>0.5894758</d>
<d>0.661475625</d>
<d>0.646049793</d>
<d>0.680420538</d>
<d>0.838100413</d>
<d>0.786546285</d>
<d>0.792055796</d>
<d>0.780405809</d>
<d>0.726098916</d>
<d>0.931220691</d>
<d>1</d>
<d>0.799072062</d>
<d>0.675325037</d>
<d>0.532418134</d>
<d>0.53767685</d>
<d>0.557320403</d>
<d></d>
<d></d>
<d></d>
<d></d>
<d></d>
<d></d>
<d></d>
<d></d>
<d></d>
<d></d>
<d></d>
</Subcolumn>
<Subcolumn>
<d>0.221383343</d>
<d>0.221183156</d>
<d>0.4715011</d>
<d>0.436261448</d>
<d>0.465046329</d>
<d>0.543482649</d>
<d>0.580374266</d>
<d>0.57303127</d>
<d>0.598381008</d>
<d>0.580878939</d>
<d>0.507987296</d>
<d>0.522976092</d>
<d>0.504224115</d>
<d>0.507504492</d>
<d>0.528635162</d>
<d>0.402140488</d>
<d>0.538318159</d>
<d>0.594495024</d>
<d>0.643963098</d>
<d>0.643128705</d>
<d>0.685583503</d>
<d>0.677804806</d>
<d>0.635551877</d>
<d>0.660938625</d>
<d>0.703850994</d>
<d>0.719275491</d>
<d>0.766356461</d>
<d>0.766766928</d>
<d>0.744224855</d>
<d>0.858461016</d>
<d>0.896523474</d>
<d>1</d>
<d>0.896225717</d>
<d>0.834169409</d>
<d>0.864922516</d>
<d></d>
<d></d>
<d></d>
</Subcolumn>
</YColumn>
</Table>
<Table ID="Table56" XFormat="none" TableType="OneWay" EVFormat="AsteriskAfterNumber">
<Title>Copy of 8-cell</Title>
<RowTitlesColumn Width="84">
<Subcolumn></Subcolumn>
</RowTitlesColumn>
<SubColumnTitles OwnSet="0">
<Subcolumn></Subcolumn>
</SubColumnTitles>
<YColumn Width="84" Decimals="9" Subcolumns="1">
<Title>Basal</Title>
<Subcolumn>
<d>0.284355657</d>
<d>0.546191638</d>
<d>0.612936373</d>
<d>0.687444017</d>
<d>0.614283185</d>
<d>0.584206111</d>
<d>0.646221495</d>
<d>0.602419091</d>
<d>0.537737227</d>
<d>0.516370484</d>
<d>0.539579076</d>
<d>0.460803512</d>
<d>0.440806846</d>
<d>0.538992269</d>
<d>0.47579681</d>
<d>0.487752673</d>
<d>0.483911286</d>
<d>0.463844825</d>
<d>0.429741534</d>
<d>0.439546634</d>
<d>0.452903594</d>
<d>0.434251156</d>
<d>0.478399957</d>
<d>0.442116175</d>
<d>0.424201768</d>
<d>0.433028427</d>
<d>0.415169599</d>
<d>0.403324893</d>
<d>0.364889056</d>
<d>0.410648344</d>
<d>0.225409924</d>
<d>0.425306665</d>
<d>0.49893628</d>
<d>0.529937658</d>
<d>0.58912279</d>
<d>0.506984488</d>
<d>0.491359286</d>
<d>0.460339661</d>
<d>0.490870898</d>
<d>0.462722565</d>
<d>0.432013147</d>
<d>0.450051308</d>
<d>0.463404162</d>
<d>0.438016564</d>
<d>0.505270299</d>
<d>0.490566058</d>
<d>0.448870589</d>
<d>0.443044279</d>
<d>0.511425063</d>
<d>0.377361974</d>
<d>0.359213255</d>
<d>0.486257508</d>
<d>0.418960839</d>
<d>0.374871731</d>
<d>0.362393682</d>
<d>0.394371836</d>
<d>0.38127874</d>
<d>0.327241193</d>
<d>0.304712273</d>
<d>0.408755338</d>
<d>0.453302682</d>
<d>0.471868711</d>
<d>0.349583586</d>
<d>0.469707283</d>
<d>0.408040316</d>
<d>0.410157567</d>
<d>0.379038565</d>
<d>0.406503919</d>
<d>0.422370208</d>
<d>0.386021892</d>
<d>0.372526466</d>
<d>0.352438765</d>
<d>0.402830636</d>
<d>0.396053471</d>
<d>0.409141483</d>
<d>0.475690888</d>
<d>0.400818103</d>
<d>0.414204451</d>
<d>0.401803421</d>
<d>0.372751372</d>
<d>0.401207218</d>
<d>0.501316668</d>
<d>0.534070199</d>
<d>0.511427022</d>
<d>0.448980053</d>
<d>0.485988593</d>
<d>0.663296967</d>
<d>0.638737153</d>
<d>0.535386867</d>
<d>0.534210777</d>
<d>0.514923912</d>
<d>0.562214764</d>
<d>0.595823062</d>
<d>0.585243276</d>
<d>0.597663134</d>
<d>0.578811811</d>
<d>0.605199144</d>
<d>0.637879876</d>
<d>0.644453175</d>
<d>0.633545791</d>
<d>0.673434935</d>
<d>0.673652078</d>
<d>0.58245932</d>
<d>0.489263319</d>
<d>0.47409967</d>
<d>0.494273937</d>
<d>0.501808693</d>
<d>0.44009474</d>
<d>0.381858849</d>
<d>0.401246128</d>
<d>0.417534404</d>
<d>0.435830944</d>
<d>0.455179313</d>
<d>0.482258243</d>
<d>0.50578129</d>
<d>0.516113808</d>
<d>0.293008094</d>
<d>0.397456323</d>
<d>0.511225873</d>
<d>0.546725635</d>
<d>0.584889939</d>
<d>0.561101344</d>
<d>0.544216753</d>
<d>0.46962788</d>
<d>0.437058199</d>
<d>0.342627184</d>
<d>0.367917445</d>
<d>0.424001026</d>
<d>0.402931912</d>
<d>0.371433542</d>
<d>0.399782075</d>
<d>0.427425558</d>
<d>0.363732923</d>
<d>0.389700765</d>
<d>0.339147713</d>
<d>0.348395781</d>
<d>0.334715965</d>
<d>0.289601875</d>
<d>0.315807787</d>
<d>0.33331502</d>
<d>0.31168736</d>
<d>0.277670952</d>
<d>0.282349925</d>
<d>0.277680108</d>
<d>0.232245541</d>
<d>0.204483024</d>
<d>0.217988866</d>
<d>0.178519442</d>
<d>0.3052655</d>
<d>0.493383795</d>
<d>0.47056489</d>
<d>0.457947686</d>
<d>0.495395572</d>
<d>0.319497619</d>
<d>0.409772154</d>
<d>0.46620215</d>
<d>0.618736027</d>
<d>0.557675512</d>
<d>0.533156553</d>
<d>0.510384339</d>
<d>0.361115994</d>
<d>0.417485567</d>
<d>0.425556019</d>
<d>0.355360802</d>
<d>0.396553476</d>
<d>0.336358094</d>
<d>0.286967257</d>
<d>0.415999736</d>
<d>0.422279501</d>
<d>0.367012628</d>
<d>0.41119619</d>
<d>0.408311041</d>
<d>0.400712979</d>
<d>0.402580567</d>
<d>0.477211307</d>
<d>0.397805859</d>
<d>0.239172109</d>
<d>0.249751446</d>
<d>0.170663213</d>
<d>0.194626016</d>
<d>0.21689151</d>
<d>0.145585352</d>
<d>0.110717758</d>
<d>0.219507506</d>
<d>0.187661011</d>
<d>0.231660232</d>
<d>0.184413127</d>
<d>0.135245174</d>
<d>0.121359073</d>
<d>0.117005792</d>
<d>0.275048263</d>
<d>0.440368726</d>
<d>0.422380309</d>
<d>0.292758687</d>
<d>0.294164093</d>
<d>0.322557915</d>
<d>0.333245174</d>
<d>0.240708494</d>
<d>0.187870656</d>
<d>0.151745174</d>
<d>0.152889961</d>
<d>0.05680695</d>
<d>0.020714286</d>
<d>0.028619691</d>
<d>0.031745174</d>
<d>0.013594595</d>
<d>0.000407336</d>
<d>0.006749035</d>
<d>0.003637066</d>
<d>0.03484556</d>
<d>0.003874517</d>
<d>0.572802128</d>
<d>0.610230655</d>
<d>0.531292385</d>
<d>0.31489797</d>
<d>0.568810924</d>
<d>0.506281389</d>
<d>0.594627934</d>
<d>0.516479313</d>
<d>0.451294431</d>
<d>0.512563801</d>
<d>0.334252544</d>
<d>0.204304199</d>
<d>0.201436097</d>
<d>0.247669411</d>
<d>0.307255153</d>
<d>0.356708433</d>
<d>0.322593975</d>
<d>0.282000716</d>
<d>0.255547486</d>
<d>0.270966092</d>
<d>0.313304352</d>
<d>0.241380862</d>
<d>0.189491127</d>
<d>0.139403672</d>
<d>0.201763412</d>
<d>0.181128216</d>
<d>0.06896333</d>
<d>0.078269319</d>
<d>0.528257057</d>
<d>0.630430189</d>
<d>0.604849635</d>
<d>0.616875113</d>
<d>0.614880649</d>
<d>0.55258036</d>
<d>0.569509237</d>
<d>0.58868849</d>
<d>0.569620758</d>
<d>0.603578296</d>
<d>0.547376441</d>
<d>0.502708198</d>
<d>0.590241566</d>
<d>0.602284653</d>
<d>0.625781527</d>
<d>0.620392131</d>
<d>0.64584473</d>
<d>0.580535723</d>
<d>0.580873808</d>
<d>0.641975309</d>
<d>0.603559259</d>
<d>0.635197531</d>
<d>0.559344444</d>
<d>0.548298765</d>
<d>0.595867901</d>
<d>0.63538642</d>
<d>0.593209877</d>
<d>0.506828395</d>
<d>0.554339506</d>
<d>0.570483951</d>
<d>0.680187654</d>
<d>0.70672716</d>
<d>0.561395062</d>
<d>0.591975309</d>
<d>0.64622716</d>
<d>0.545577778</d>
<d>0.760938272</d>
<d>0.825308642</d>
<d>0.606988889</d>
<d>0.6193</d>
<d>0.696604938</d>
<d>0.753388889</d>
<d>0.621655556</d>
<d>0.631745679</d>
<d>0.651171605</d>
<d>0.594117284</d>
<d>0.496517284</d>
<d>0.378181702</d>
<d>0.37655154</d>
<d>0.391676818</d>
<d>0.316102181</d>
<d>0.380614008</d>
<d>0.303309687</d>
<d>0.292191145</d>
<d>0.308492767</d>
<d>0.314553626</d>
<d>0.364013822</d>
<d>0.390183995</d>
<d>0.378894276</d>
<d>0.355624159</d>
<d>0.360050875</d>
<d>0.415928217</d>
<d>0.436624708</d>
<d>0.53809285</d>
<d>0.305178701</d>
<d>0.438784325</d>
<d>0.459383285</d>
<d>0.466079092</d>
<d>0.343795033</d>
<d>0.313687789</d>
<d>0.267678999</d>
<d>0.244434758</d>
<d>0.288938782</d>
<d>0.275861657</d>
<d>0.26915908</d>
<d>0.215948012</d>
<d>0.263950852</d>
<d>0.249421308</d>
<d>0.300287327</d>
<d>0.370016351</d>
<d>0.416074517</d>
<d>0.330732584</d>
<d>0.259987484</d>
<d>0.380271312</d>
<d>0.411214513</d>
<d>0.37987262</d>
<d>0.285308625</d>
<d>0.355486808</d>
<d>0.338205113</d>
<d>0.278271797</d>
<d>0.272848241</d>
<d>0.254015517</d>
<d>0.351925497</d>
<d>0.34758026</d>
<d>0.359502325</d>
<d>0.352711105</d>
<d>0.383639165</d>
<d>0.343436892</d>
<d>0.300112374</d>
<d>0.254516826</d>
<d>0.266368237</d>
<d>0.303813311</d>
<d>0.289221525</d>
<d>0.333281184</d>
<d>0.311215186</d>
<d>0.336664177</d>
<d>0.304822658</d>
<d>0.275607122</d>
<d>0.225432505</d>
<d>0.241899994</d>
<d>0.244934763</d>
</Subcolumn>
</YColumn>
<YColumn Width="84" Decimals="9" Subcolumns="1">
<Title>Apical</Title>
<Subcolumn>
<d>0.545441973</d>
<d>0.483202982</d>
<d>0.479935477</d>
<d>0.538426143</d>
<d>0.545049045</d>
<d>0.63919274</d>
<d>0.626753473</d>
<d>0.566577353</d>
<d>0.59581687</d>
<d>0.648497633</d>
<d>0.69548482</d>
<d>0.737225645</d>
<d>0.786574277</d>
<d>0.775524475</d>
<d>0.781152132</d>
<d>0.857541694</d>
<d>0.94509997</d>
<d>0.833628675</d>
<d>0.865609639</d>
<d>0.880675319</d>
<d>0.818323879</d>
<d>0.881487025</d>
<d>0.897703053</d>
<d>1</d>
<d>0.957998084</d>
<d>0.523691656</d>
<d>0.499548107</d>
<d>0.444406399</d>
<d>0.500037568</d>
<d>0.696518812</d>
<d>0.762208631</d>
<d>0.644009034</d>
<d>0.706355272</d>
<d>0.603348303</d>
<d>0.595475057</d>
<d>0.539035632</d>
<d>0.576819702</d>
<d>0.637930479</d>
<d>0.71645793</d>
<d>0.723358694</d>
<d>0.740443693</d>
<d>0.760655449</d>
<d>0.803880486</d>
<d>0.828018668</d>
<d>0.881524544</d>
<d>0.98948731</d>
<d>1</d>
<d>0.941224899</d>
<d>0.913645958</d>
<d>0.750524404</d>
<d>0.842143757</d>
<d>0.842225567</d>
<d>0.886658377</d>
<d>0.770800268</d>
<d>0.769653288</d>
<d>0.745571609</d>
<d>0.781186904</d>
<d>0.865338613</d>
<d>1</d>
<d>0.933115173</d>
<d>0.767972904</d>
<d>0.802567207</d>
<d>0.863447159</d>
<d>0.9602811</d>
<d>0.949110722</d>
<d>0.842505359</d>
<d>0.402142316</d>
<d>0.399762523</d>
<d>0.452486984</d>
<d>0.493975208</d>
<d>0.472928601</d>
<d>0.445414129</d>
<d>0.450645657</d>
<d>0.459371564</d>
<d>0.468378628</d>
<d>0.436767297</d>
<d>0.508530101</d>
<d>0.600832425</d>
<d>0.535145875</d>
<d>0.55039864</d>
<d>0.582839635</d>
<d>0.584800203</d>
<d>0.627951521</d>
<d>0.65552373</d>
<d>0.683149912</d>
<d>0.66461489</d>
<d>0.710110856</d>
<d>0.642840288</d>
<d>0.640319916</d>
<d>0.694735085</d>
<d>0.71797572</d>
<d>0.712933722</d>
<d>0.774141844</d>
<d>0.735824166</d>
<d>0.700934345</d>
<d>0.830934295</d>
<d>0.809172244</d>
<d>0.845927241</d>
<d>0.879318395</d>
<d>0.859096432</d>
<d>0.895567761</d>
<d>0.941536924</d>
<d>1</d>
<d>0.886492918</d>
<d>0.303281691</d>
<d>0.311183753</d>
<d>0.327592206</d>
<d>0.335256199</d>
<d>0.346601106</d>
<d>0.355711827</d>
<d>0.355199062</d>
<d>0.330128557</d>
<d>0.362524265</d>
<d>0.356499286</d>
<d>0.36444713</d>
<d>0.398188844</d>
<d>0.416721606</d>
<d>0.394993224</d>
<d>0.414780427</d>
<d>0.411877816</d>
<d>0.445115921</d>
<d>0.601710435</d>
<d>0.498635681</d>
<d>0.503983079</d>
<d>0.514458118</d>
<d>0.637127788</d>
<d>0.713721935</d>
<d>0.812511446</d>
<d>0.852333077</d>
<d>1</d>
<d>0.806065268</d>
<d>0.60311138</d>
<d>0.411087705</d>
<d>0.371093857</d>
<d>0.377878969</d>
<d>0.563173911</d>
<d>0.585870598</d>
<d>0.473386871</d>
<d>0.507404437</d>
<d>0.479146183</d>
<d>0.557947411</d>
<d>0.621125441</d>
<d>0.522942495</d>
<d>0.520028508</d>
<d>0.588737895</d>
<d>0.675902072</d>
<d>0.366979671</d>
<d>0.491009486</d>
<d>0.598283192</d>
<d>0.525392331</d>
<d>0.652606659</d>
<d>0.54978358</d>
<d>0.378314282</d>
<d>0.562605395</d>
<d>0.693677116</d>
<d>0.680432347</d>
<d>0.534341648</d>
<d>0.544787782</d>
<d>0.718926631</d>
<d>1</d>
<d>0.65301176</d>
<d>0.765616332</d>
<d>0.93981011</d>
<d>0.783811582</d>
<d>0.940936156</d>
<d>0.889935898</d>
<d>0.686606373</d>
<d>0.652711024</d>
<d>0.67691414</d>
<d>0.486467181</d>
<d>0.575673745</d>
<d>0.714623552</d>
<d>0.266312741</d>
<d>0.585332046</d>
<d>0.614583012</d>
<d>0.40434749</d>
<d>0.414646718</d>
<d>0.490694981</d>
<d>0.477907336</d>
<d>0.503202703</d>
<d>0.752519305</d>
<d>0.585934363</d>
<d>0.752681467</d>
<d>0.632934363</d>
<d>0.627708494</d>
<d>0.619086873</d>
<d>0.505635135</d>
<d>0.560171815</d>
<d>0.684521236</d>
<d>0.778631274</d>
<d>0.891474903</d>
<d>1</d>
<d>0.910864865</d>
<d>0.808766409</d>
<d>0.68507722</d>
<d>0.560629344</d>
<d>0.801328185</d>
<d>0.714285714</d>
<d>0.691314888</d>
<d>0.282839462</d>
<d>0.40303176</d>
<d>0.530431136</d>
<d>0.491233059</d>
<d>0.534731243</d>
<d>0.644596737</d>
<d>0.554143098</d>
<d>0.547085358</d>
<d>0.610834143</d>
<d>0.573996829</d>
<d>0.629098348</d>
<d>0.873308444</d>
<d>0.763888917</d>
<d>0.72682862</d>
<d>0.459145911</d>
<d>0.4406935</d>
<d>0.536416918</d>
<d>0.753600982</d>
<d>0.704751189</d>
<d>0.822867079</d>
<d>0.800783511</d>
<d>1</d>
<d>0.854833529</d>
<d>0.51757582</d>
<d>0.620882729</d>
<d>0.708766941</d>
<d>0.593259346</d>
<d>0.767464765</d>
<d>0.760130209</d>
<d>0.721047405</d>
<d>0.709176882</d>
<d>0.701008854</d>
<d>0.734528525</d>
<d>0.726563582</d>
<d>0.701116853</d>
<d>0.852866323</d>
<d>0.645011258</d>
<d>0.718380293</d>
<d>0.800269528</d>
<d>0.96166732</d>
<d>0.998295491</d>
<d>1</d>
<d>0.848326834</d>
<d>0.819167044</d>
<d>0.744899972</d>
<d>0.880428428</d>
<d>0.674307407</d>
<d>0.722020988</d>
<d>0.712601235</d>
<d>0.576669136</d>
<d>0.529324691</d>
<d>0.576630864</d>
<d>0.669290123</d>
<d>0.706475309</d>
<d>0.68778642</d>
<d>0.728041975</d>
<d>0.748601235</d>
<d>0.781708642</d>
<d>0.940555556</d>
<d>0.789506173</d>
<d>0.811558025</d>
<d>0.807911111</d>
<d>0.869683951</d>
<d>0.844923457</d>
<d>0.90684321</d>
<d>0.82408642</d>
<d>0.710185185</d>
<d>0.680222222</d>
<d>0.871503704</d>
<d>1</d>
<d>0.864593827</d>
<d>0.763604938</d>
<d>0.755096296</d>
<d>0.777777778</d>
<d>0.70917429</d>
<d>0.676662606</d>
<d>0.590801427</d>
<d>0.613235563</d>
<d>0.601927931</d>
<d>0.604051719</d>
<d>0.561569972</d>
<d>0.58655982</d>
<d>0.571583825</d>
<d>0.645548204</d>
<d>0.607704158</d>
<d>0.5894758</d>
<d>0.661475625</d>
<d>0.646049793</d>
<d>0.680420538</d>
<d>0.838100413</d>
<d>0.786546285</d>
<d>0.792055796</d>
<d>0.780405809</d>
<d>0.726098916</d>
<d>0.931220691</d>
<d>1</d>
<d>0.799072062</d>
<d>0.675325037</d>
<d>0.532418134</d>
<d>0.53767685</d>
<d>0.557320403</d>
<d>0.221383343</d>
<d>0.221183156</d>
<d>0.4715011</d>
<d>0.436261448</d>
<d>0.465046329</d>
<d>0.543482649</d>
<d>0.580374266</d>
<d>0.57303127</d>
<d>0.598381008</d>
<d>0.580878939</d>
<d>0.507987296</d>
<d>0.522976092</d>
<d>0.504224115</d>
<d>0.507504492</d>
<d>0.528635162</d>
<d>0.402140488</d>
<d>0.538318159</d>
<d>0.594495024</d>
<d>0.643963098</d>
<d>0.643128705</d>
<d>0.685583503</d>
<d>0.677804806</d>
<d>0.635551877</d>
<d>0.660938625</d>
<d>0.703850994</d>
<d>0.719275491</d>
<d>0.766356461</d>
<d>0.766766928</d>
<d>0.744224855</d>
<d>0.858461016</d>
<d>0.896523474</d>
<d>1</d>
<d>0.896225717</d>
<d>0.834169409</d>
<d>0.864922516</d>
</Subcolumn>
</YColumn>
</Table>
<Table ID="Table18" XFormat="none" YFormat="replicates" Replicates="8" TableType="TwoWay" EVFormat="AsteriskAfterNumber">
<Title>16-cells</Title>
<RowTitlesColumn Width="84">
<Subcolumn></Subcolumn>
</RowTitlesColumn>
<SubColumnTitles OwnSet="0">
<Subcolumn>
<d>1</d>
</Subcolumn>
<Subcolumn>
<d>2</d>
</Subcolumn>
<Subcolumn>
<d>3</d>
</Subcolumn>
<Subcolumn>
<d>4</d>
</Subcolumn>
<Subcolumn>
<d>5</d>
</Subcolumn>
<Subcolumn>
<d>6</d>
</Subcolumn>
<Subcolumn>
<d>7</d>
</Subcolumn>
<Subcolumn>
<d>8</d>
</Subcolumn>
</SubColumnTitles>
<YColumn Width="672" Decimals="9" Subcolumns="8">
<Title>Basal</Title>
<Subcolumn>
<d>0.388667647</d>
<d>0.441517478</d>
<d>0.51813882</d>
<d>0.510990325</d>
<d>0.446357885</d>
<d>0.467435631</d>
<d>0.575317811</d>
<d>0.556536194</d>
<d>0.511967974</d>
<d>0.427618125</d>
<d>0.327308985</d>
<d>0.431271601</d>
<d>0.44197192</d>
<d>0.401143879</d>
<d>0.363006613</d>
<d>0.320668748</d>
<d>0.364444684</d>
<d>0.667970198</d>
<d>0.48378359</d>
<d>0.433720207</d>
<d>0.394141882</d>
<d>0.267373444</d>
<d>0.352422894</d>
<d>0.18944857</d>
<d>0.206382521</d>
<d>0.395831091</d>
<d></d>
<d></d>
<d></d>
<d></d>
<d></d>
<d></d>
<d></d>
</Subcolumn>
<Subcolumn>
<d>0.496755712</d>
<d>0.427148409</d>
<d>0.523826533</d>
<d>0.51852544</d>
<d>0.422436327</d>
<d>0.436589133</d>
<d>0.48128532</d>
<d>0.367951687</d>
<d>0.50814088</d>
<d>0.474676103</d>
<d>0.55889039</d>
<d>0.476085943</d>
<d>0.492292007</d>
<d>0.507819171</d>
<d>0.448856634</d>
<d>0.455799386</d>
<d>0.50565237</d>
<d>0.398473777</d>
<d>0.418265944</d>
<d>0.412929368</d>
<d>0.397991215</d>
<d></d>
<d></d>
<d></d>
<d></d>
<d></d>
<d></d>
<d></d>
<d></d>
<d></d>
<d></d>
<d></d>
<d></d>
</Subcolumn>
<Subcolumn>
<d>0.172473267</d>
<d>0.303353373</d>
<d>0.373275267</d>
<d>0.551995762</d>
<d>0.662431627</d>
<d>0.613003252</d>
<d>0.648823486</d>
<d>0.567607057</d>
<d>0.543305573</d>
<d>0.497679003</d>
<d>0.536258808</d>
<d>0.600649239</d>
<d>0.525810624</d>
<d>0.56064776</d>
<d>0.543910462</d>
<d>0.46445942</d>
<d>0.419632386</d>
<d>0.434223624</d>
<d>0.482417582</d>
<d>0.453099591</d>
<d>0.480495737</d>
<d>0.489392894</d>
<d>0.4623072</d>
<d>0.433160449</d>
<d>0.486060464</d>
<d>0.498208742</d>
<d>0.512358942</d>
<d>0.447421525</d>
<d>0.404884689</d>
<d></d>
<d></d>
<d></d>
<d></d>
</Subcolumn>
<Subcolumn>
<d>0.100003375</d>
<d>0.178791034</d>
<d>0.104118514</d>
<d>0.112503797</d>
<d>0.169055706</d>
<d>0.206380715</d>
<d>0.277169354</d>
<d>0.278494399</d>
<d>0.269419093</d>
<d>0.189590149</d>
<d>0.202030569</d>
<d>0.327171042</d>
<d>0.362049719</d>
<d>0.36622486</d>
<d>0.362254726</d>
<d>0.424975593</d>
<d>0.367038638</d>
<d>0.486175158</d>
<d>0.459738016</d>
<d>0.489531522</d>
<d>0.485407633</d>
<d>0.470463378</d>
<d>0.472735955</d>
<d>0.45215401</d>
<d>0.426865657</d>
<d>0.357685822</d>
<d>0.306406591</d>
<d>0.328136075</d>
<d>0.354144452</d>
<d>0.35527199</d>
<d>0.371926303</d>
<d>0.378107761</d>
<d>0.291504838</d>
</Subcolumn>
<Subcolumn>
<d>0.300043006</d>
<d>0.480708902</d>
<d>0.496474495</d>
<d>0.526560474</d>
<d>0.540957537</d>
<d>0.557656597</d>
<d>0.53039269</d>
<d>0.51509383</d>
<d>0.415274523</d>
<d>0.444753748</d>
<d>0.559883583</d>
<d>0.554989549</d>
<d>0.373645222</d>
<d>0.382188114</d>
<d>0.448109229</d>
<d>0.500410059</d>
<d>0.473516204</d>
<d>0.450079511</d>
<d></d>
<d></d>
<d></d>
<d></d>
<d></d>
<d></d>
<d></d>
<d></d>
<d></d>
<d></d>
<d></d>
<d></d>
<d></d>
<d></d>
<d></d>
</Subcolumn>
<Subcolumn>
<d>0.675303042</d>
<d>0.69244636</d>
<d>0.671007365</d>
<d>0.608423655</d>
<d>0.502853155</d>
<d>0.56816809</d>
<d>0.5561552</d>
<d>0.399822545</d>
<d>0.529021148</d>
<d>0.656060657</d>
<d>0.54422297</d>
<d>0.475441479</d>
<d>0.560497773</d>
<d>0.548721239</d>
<d>0.555639343</d>
<d>0.53120838</d>
<d>0.46023403</d>
<d>0.533264302</d>
<d>0.6661283</d>
<d>0.57343733</d>
<d></d>
<d></d>
<d></d>
<d></d>
<d></d>
<d></d>
<d></d>
<d></d>
<d></d>
<d></d>
<d></d>
<d></d>
<d></d>
</Subcolumn>
<Subcolumn>
<d>0.569863482</d>
<d>0.549405383</d>
<d>0.361581941</d>
<d>0.335343289</d>
<d>0.407975952</d>
<d>0.405785539</d>
<d>0.555616895</d>
<d>0.529680983</d>
<d>0.428676243</d>
<d>0.418628837</d>
<d>0.456620923</d>
<d>0.522376046</d>
<d>0.444931599</d>
<d>0.44322557</d>
<d>0.439086936</d>
<d>0.48767136</d>
<d>0.508129459</d>
<d>0.347702204</d>
<d>0.36328797</d>
<d>0.351780289</d>
<d></d>
<d></d>
<d></d>
<d></d>
<d></d>
<d></d>
<d></d>
<d></d>
<d></d>
<d></d>
<d></d>
<d></d>
<d></d>
</Subcolumn>
<Subcolumn>
<d>0.413183971</d>
<d>0.294784889</d>
<d>0.280884894</d>
<d>0.422779561</d>
<d>0.451335435</d>
<d>0.436995521</d>
<d>0.449366735</d>
<d>0.460675823</d>
<d>0.403065825</d>
<d>0.481242663</d>
<d>0.455967956</d>
<d>0.31830721</d>
<d>0.298680971</d>
<d>0.367935466</d>
<d>0.331959294</d>
<d>0.35786836</d>
<d>0.346950581</d>
<d>0.325231687</d>
<d></d>
<d></d>
<d></d>
<d></d>
<d></d>
<d></d>
<d></d>
<d></d>
<d></d>
<d></d>
<d></d>
<d></d>
<d></d>
<d></d>
<d></d>
</Subcolumn>
</YColumn>
<YColumn Width="672" Decimals="9" Subcolumns="8">
<Title>Apical</Title>
<Subcolumn>
<d>0.549265119</d>
<d>0.590401105</d>
<d>0.567954054</d>
<d>0.652824119</d>
<d>0.542738492</d>
<d>0.580594721</d>
<d>0.551307119</d>
<d>0.61028893</d>
<d>0.549713582</d>
<d>0.521430536</d>
<d>0.513163874</d>
<d>0.528504287</d>
<d>0.650919647</d>
<d>0.619434578</d>
<d>0.626451524</d>
<d>0.566868774</d>
<d>0.701509226</d>
<d>0.727131394</d>
<d>0.853663641</d>
<d>1</d>
<d>0.970281874</d>
<d>0.766727658</d>
<d>0.759881127</d>
<d>0.63610842</d>
<d>0.587372487</d>
<d>0.777335295</d>
<d></d>
<d></d>
<d></d>
<d></d>
<d></d>
<d></d>
<d></d>
</Subcolumn>
<Subcolumn>
<d>0.495847359</d>
<d>0.566133561</d>
<d>0.539684868</d>
<d>0.612405173</d>
<d>0.599243512</d>
<d>0.558845445</d>
<d>0.571188642</d>
<d>0.542227784</d>
<d>0.556047055</d>
<d>0.55496602</d>
<d>0.675117033</d>
<d>0.714495568</d>
<d>0.8044462</d>
<d>0.747636271</d>
<d>0.873892649</d>
<d>0.866658939</d>
<d>1</d>
<d>0.95028185</d>
<d>0.889415082</d>
<d>0.918494215</d>
<d>0.946201356</d>
<d></d>
<d></d>
<d></d>
<d></d>
<d></d>
<d></d>
<d></d>
<d></d>
<d></d>
<d></d>
<d></d>
<d></d>
</Subcolumn>
<Subcolumn>
<d>0.452551372</d>
<d>0.457545705</d>
<d>0.422035924</d>
<d>0.462756862</d>
<d>0.543511309</d>
<d>0.488296457</d>
<d>0.433973538</d>
<d>0.502939437</d>
<d>0.57177475</d>
<d>0.63913172</d>
<d>0.609185433</d>
<d>0.590691371</d>
<d>0.594058296</d>
<d>0.580772927</d>
<d>0.642441975</d>
<d>0.683753018</d>
<d>0.669576948</d>
<d>0.656504706</d>
<d>0.693226728</d>
<d>0.738757207</d>
<d>0.790959937</d>
<d>0.764227813</d>
<d>0.809373922</d>
<d>1</d>
<d>0.844978564</d>
<d>0.75691741</d>
<d>0.791722515</d>
<d>0.836662889</d>
<d>0.751490662</d>
<d></d>
<d></d>
<d></d>
<d></d>
</Subcolumn>
<Subcolumn>
<d>0.280925731</d>
<d>0.227751437</d>
<d>0.236272974</d>
<d>0.231914077</d>
<d>0.254192329</d>
<d>0.260425039</d>
<d>0.239085569</d>
<d>0.253257297</d>
<d>0.248928401</d>
<d>0.231857825</d>
<d>0.15821909</d>
<d>0.199080469</d>
<d>0.258478724</d>
<d>0.332341217</d>
<d>0.276398078</d>
<d>0.32829858</d>
<d>0.52297765</d>
<d>0.495734231</d>
<d>0.563119005</d>
<d>0.627147416</d>
<d>0.587211068</d>
<d>0.621137213</d>
<d>0.676429079</d>
<d>0.690995821</d>
<d>0.734661045</d>
<d>0.810632359</d>
<d>0.849874933</d>
<d>0.833983147</d>
<d>0.83823079</d>
<d>0.904466776</d>
<d>1</d>
<d>0.865057946</d>
<d>0.875029532</d>
</Subcolumn>
<Subcolumn>
<d>0.583750338</d>
<d>0.574545685</d>
<d>0.590728004</d>
<d>0.638236481</d>
<d>0.656650787</d>
<d>0.634870998</d>
<d>0.5858123</d>
<d>0.683718</d>
<d>0.715014152</d>
<d>0.823946432</d>
<d>0.708478215</d>
<d>0.756356744</d>
<d>0.77839657</d>
<d>1</d>
<d>0.991800491</d>
<d>0.952583204</d>
<d>0.818667342</d>
<d>0.766776571</d>
<d></d>
<d></d>
<d></d>
<d></d>
<d></d>
<d></d>
<d></d>
<d></d>
<d></d>
<d></d>
<d></d>
<d></d>
<d></d>
<d></d>
<d></d>
</Subcolumn>
<Subcolumn>
<d>0.593855868</d>
<d>0.561398177</d>
<d>0.620785452</d>
<d>0.632766454</d>
<d>0.725806331</d>
<d>0.768759356</d>
<d>0.699608324</d>
<d>0.708584227</d>
<d>0.760342454</d>
<d>0.900139563</d>
<d>0.931895688</d>
<d>0.97012722</d>
<d>0.988746825</d>
<d>0.936253269</d>
<d>1</d>
<d>0.966324888</d>
<d>0.779924366</d>
<d></d>
<d></d>
<d></d>
<d></d>
<d></d>
<d></d>
<d></d>
<d></d>
<d></d>
<d></d>
<d></d>
<d></d>
<d></d>
<d></d>
<d></d>
<d></d>
</Subcolumn>
<Subcolumn>
<d>0.433242274</d>
<d>0.396714025</d>
<d>0.525417692</d>
<d>0.433911863</d>
<d>0.435617892</d>
<d>0.297532847</d>
<d>0.458266404</d>
<d>0.496985066</d>
<d>0.508492747</d>
<d>0.622223251</d>
<d>0.610957762</d>
<d>0.758723363</d>
<d>0.805601758</d>
<d>0.753972127</d>
<d>0.740943623</d>
<d>0.811934366</d>
<d>1</d>
<d>0.730899779</d>
<d>0.631476409</d>
<d></d>
<d></d>
<d></d>
<d></d>
<d></d>
<d></d>
<d></d>
<d></d>
<d></d>
<d></d>
<d></d>
<d></d>
<d></d>
<d></d>
</Subcolumn>
<Subcolumn>
<d>0.641937201</d>
<d>0.6361745</d>
<d>0.694409135</d>
<d>0.673499595</d>
<d>0.79451632</d>
<d>0.758741879</d>
<d>0.736860142</d>
<d>0.883316846</d>
<d>1</d>
<d>0.984213942</d>
<d>0.889154893</d>
<d>0.77281687</d>
<d>0.785547797</d>
<d>0.858793163</d>
<d>0.738656277</d>
<d></d>
<d></d>
<d></d>
<d></d>
<d></d>
<d></d>
<d></d>
<d></d>
<d></d>
<d></d>
<d></d>
<d></d>
<d></d>
<d></d>
<d></d>
<d></d>
<d></d>
<d></d>
</Subcolumn>
</YColumn>
</Table>
<Table ID="Table60" XFormat="none" TableType="OneWay" EVFormat="AsteriskAfterNumber">
<Title>Copy of 16-cells</Title>
<RowTitlesColumn Width="84">
<Subcolumn></Subcolumn>
</RowTitlesColumn>
<SubColumnTitles OwnSet="0">
<Subcolumn></Subcolumn>
</SubColumnTitles>
<YColumn Width="84" Decimals="9" Subcolumns="1">
<Title>Basal</Title>
<Subcolumn>
<d>0.388667647</d>
<d>0.441517478</d>
<d>0.51813882</d>
<d>0.510990325</d>
<d>0.446357885</d>
<d>0.467435631</d>
<d>0.575317811</d>
<d>0.556536194</d>
<d>0.511967974</d>
<d>0.427618125</d>
<d>0.327308985</d>
<d>0.431271601</d>
<d>0.44197192</d>
<d>0.401143879</d>
<d>0.363006613</d>
<d>0.320668748</d>
<d>0.364444684</d>
<d>0.667970198</d>
<d>0.48378359</d>
<d>0.433720207</d>
<d>0.394141882</d>
<d>0.267373444</d>
<d>0.352422894</d>
<d>0.18944857</d>
<d>0.206382521</d>
<d>0.395831091</d>
<d>0.496755712</d>
<d>0.427148409</d>
<d>0.523826533</d>
<d>0.51852544</d>
<d>0.422436327</d>
<d>0.436589133</d>
<d>0.48128532</d>
<d>0.367951687</d>
<d>0.50814088</d>
<d>0.474676103</d>
<d>0.55889039</d>
<d>0.476085943</d>
<d>0.492292007</d>
<d>0.507819171</d>
<d>0.448856634</d>
<d>0.455799386</d>
<d>0.50565237</d>
<d>0.398473777</d>
<d>0.418265944</d>
<d>0.412929368</d>
<d>0.397991215</d>
<d>0.172473267</d>
<d>0.303353373</d>
<d>0.373275267</d>
<d>0.551995762</d>
<d>0.662431627</d>
<d>0.613003252</d>
<d>0.648823486</d>
<d>0.567607057</d>
<d>0.543305573</d>
<d>0.497679003</d>
<d>0.536258808</d>
<d>0.600649239</d>
<d>0.525810624</d>
<d>0.56064776</d>
<d>0.543910462</d>
<d>0.46445942</d>
<d>0.419632386</d>
<d>0.434223624</d>
<d>0.482417582</d>
<d>0.453099591</d>
<d>0.480495737</d>
<d>0.489392894</d>
<d>0.4623072</d>
<d>0.433160449</d>
<d>0.486060464</d>
<d>0.498208742</d>
<d>0.512358942</d>
<d>0.447421525</d>
<d>0.404884689</d>
<d>0.100003375</d>
<d>0.178791034</d>
<d>0.104118514</d>
<d>0.112503797</d>
<d>0.169055706</d>
<d>0.206380715</d>
<d>0.277169354</d>
<d>0.278494399</d>
<d>0.269419093</d>
<d>0.189590149</d>
<d>0.202030569</d>
<d>0.327171042</d>
<d>0.362049719</d>
<d>0.36622486</d>
<d>0.362254726</d>
<d>0.424975593</d>
<d>0.367038638</d>
<d>0.486175158</d>
<d>0.459738016</d>
<d>0.489531522</d>
<d>0.485407633</d>
<d>0.470463378</d>
<d>0.472735955</d>
<d>0.45215401</d>
<d>0.426865657</d>
<d>0.357685822</d>
<d>0.306406591</d>
<d>0.328136075</d>
<d>0.354144452</d>
<d>0.35527199</d>
<d>0.371926303</d>
<d>0.378107761</d>
<d>0.291504838</d>
<d>0.300043006</d>
<d>0.480708902</d>
<d>0.496474495</d>
<d>0.526560474</d>
<d>0.540957537</d>
<d>0.557656597</d>
<d>0.53039269</d>
<d>0.51509383</d>
<d>0.415274523</d>
<d>0.444753748</d>
<d>0.559883583</d>
<d>0.554989549</d>
<d>0.373645222</d>
<d>0.382188114</d>
<d>0.448109229</d>
<d>0.500410059</d>
<d>0.473516204</d>
<d>0.450079511</d>
<d>0.675303042</d>
<d>0.69244636</d>
<d>0.671007365</d>
<d>0.608423655</d>
<d>0.502853155</d>
<d>0.56816809</d>
<d>0.5561552</d>
<d>0.399822545</d>
<d>0.529021148</d>
<d>0.656060657</d>
<d>0.54422297</d>
<d>0.475441479</d>
<d>0.560497773</d>
<d>0.548721239</d>
<d>0.555639343</d>
<d>0.53120838</d>
<d>0.46023403</d>
<d>0.533264302</d>
<d>0.6661283</d>
<d>0.57343733</d>
<d>0.569863482</d>
<d>0.549405383</d>
<d>0.361581941</d>
<d>0.335343289</d>
<d>0.407975952</d>
<d>0.405785539</d>
<d>0.555616895</d>
<d>0.529680983</d>
<d>0.428676243</d>
<d>0.418628837</d>
<d>0.456620923</d>
<d>0.522376046</d>
<d>0.444931599</d>
<d>0.44322557</d>
<d>0.439086936</d>
<d>0.48767136</d>
<d>0.508129459</d>
<d>0.347702204</d>
<d>0.36328797</d>
<d>0.351780289</d>
<d>0.413183971</d>
<d>0.294784889</d>
<d>0.280884894</d>
<d>0.422779561</d>
<d>0.451335435</d>
<d>0.436995521</d>
<d>0.449366735</d>
<d>0.460675823</d>
<d>0.403065825</d>
<d>0.481242663</d>
<d>0.455967956</d>
<d>0.31830721</d>
<d>0.298680971</d>
<d>0.367935466</d>
<d>0.331959294</d>
<d>0.35786836</d>
<d>0.346950581</d>
<d>0.325231687</d>
</Subcolumn>
</YColumn>
<YColumn Width="84" Decimals="9" Subcolumns="1">
<Title>Apical</Title>
<Subcolumn>
<d>0.549265119</d>
<d>0.590401105</d>
<d>0.567954054</d>
<d>0.652824119</d>
<d>0.542738492</d>
<d>0.580594721</d>
<d>0.551307119</d>
<d>0.61028893</d>
<d>0.549713582</d>
<d>0.521430536</d>
<d>0.513163874</d>
<d>0.528504287</d>
<d>0.650919647</d>
<d>0.619434578</d>
<d>0.626451524</d>
<d>0.566868774</d>
<d>0.701509226</d>
<d>0.727131394</d>
<d>0.853663641</d>
<d>1</d>
<d>0.970281874</d>
<d>0.766727658</d>
<d>0.759881127</d>
<d>0.63610842</d>
<d>0.587372487</d>
<d>0.777335295</d>
<d>0.495847359</d>
<d>0.566133561</d>
<d>0.539684868</d>
<d>0.612405173</d>
<d>0.599243512</d>
<d>0.558845445</d>
<d>0.571188642</d>
<d>0.542227784</d>
<d>0.556047055</d>
<d>0.55496602</d>
<d>0.675117033</d>
<d>0.714495568</d>
<d>0.8044462</d>
<d>0.747636271</d>
<d>0.873892649</d>
<d>0.866658939</d>
<d>1</d>
<d>0.95028185</d>
<d>0.889415082</d>
<d>0.918494215</d>
<d>0.946201356</d>
<d>0.452551372</d>
<d>0.457545705</d>
<d>0.422035924</d>
<d>0.462756862</d>
<d>0.543511309</d>
<d>0.488296457</d>
<d>0.433973538</d>
<d>0.502939437</d>
<d>0.57177475</d>
<d>0.63913172</d>
<d>0.609185433</d>
<d>0.590691371</d>
<d>0.594058296</d>
<d>0.580772927</d>
<d>0.642441975</d>
<d>0.683753018</d>
<d>0.669576948</d>
<d>0.656504706</d>
<d>0.693226728</d>
<d>0.738757207</d>
<d>0.790959937</d>
<d>0.764227813</d>
<d>0.809373922</d>
<d>1</d>
<d>0.844978564</d>
<d>0.75691741</d>
<d>0.791722515</d>
<d>0.836662889</d>
<d>0.751490662</d>
<d>0.280925731</d>
<d>0.227751437</d>
<d>0.236272974</d>
<d>0.231914077</d>
<d>0.254192329</d>
<d>0.260425039</d>
<d>0.239085569</d>
<d>0.253257297</d>
<d>0.248928401</d>
<d>0.231857825</d>
<d>0.15821909</d>
<d>0.199080469</d>
<d>0.258478724</d>
<d>0.332341217</d>
<d>0.276398078</d>
<d>0.32829858</d>
<d>0.52297765</d>
<d>0.495734231</d>
<d>0.563119005</d>
<d>0.627147416</d>
<d>0.587211068</d>
<d>0.621137213</d>
<d>0.676429079</d>
<d>0.690995821</d>
<d>0.734661045</d>
<d>0.810632359</d>
<d>0.849874933</d>
<d>0.833983147</d>
<d>0.83823079</d>
<d>0.904466776</d>
<d>1</d>
<d>0.865057946</d>
<d>0.875029532</d>
<d>0.583750338</d>
<d>0.574545685</d>
<d>0.590728004</d>
<d>0.638236481</d>
<d>0.656650787</d>
<d>0.634870998</d>
<d>0.5858123</d>
<d>0.683718</d>
<d>0.715014152</d>
<d>0.823946432</d>
<d>0.708478215</d>
<d>0.756356744</d>
<d>0.77839657</d>
<d>1</d>
<d>0.991800491</d>
<d>0.952583204</d>
<d>0.818667342</d>
<d>0.766776571</d>
<d>0.593855868</d>
<d>0.561398177</d>
<d>0.620785452</d>
<d>0.632766454</d>
<d>0.725806331</d>
<d>0.768759356</d>
<d>0.699608324</d>
<d>0.708584227</d>
<d>0.760342454</d>
<d>0.900139563</d>
<d>0.931895688</d>
<d>0.97012722</d>
<d>0.988746825</d>
<d>0.936253269</d>
<d>1</d>
<d>0.966324888</d>
<d>0.779924366</d>
<d>0.433242274</d>
<d>0.396714025</d>
<d>0.525417692</d>
<d>0.433911863</d>
<d>0.435617892</d>
<d>0.297532847</d>
<d>0.458266404</d>
<d>0.496985066</d>
<d>0.508492747</d>
<d>0.622223251</d>
<d>0.610957762</d>
<d>0.758723363</d>
<d>0.805601758</d>
<d>0.753972127</d>
<d>0.740943623</d>
<d>0.811934366</d>
<d>1</d>
<d>0.730899779</d>
<d>0.631476409</d>
<d>0.641937201</d>
<d>0.6361745</d>
<d>0.694409135</d>
<d>0.673499595</d>
<d>0.79451632</d>
<d>0.758741879</d>
<d>0.736860142</d>
<d>0.883316846</d>
<d>1</d>
<d>0.984213942</d>
<d>0.889154893</d>
<d>0.77281687</d>
<d>0.785547797</d>
<d>0.858793163</d>
<d>0.738656277</d>
</Subcolumn>
</YColumn>
</Table>
<Table ID="Table20" XFormat="numbers" YFormat="replicates" Replicates="11" TableType="XY" EVFormat="AsteriskAfterNumber">
<Title>32-cells</Title>
<RowTitlesColumn Width="84">
<Subcolumn></Subcolumn>
</RowTitlesColumn>
<SubColumnTitles OwnSet="0">
<Subcolumn>
<d>1</d>
</Subcolumn>
<Subcolumn>
<d>2</d>
</Subcolumn>
<Subcolumn>
<d>3</d>
</Subcolumn>
<Subcolumn>
<d>4</d>
</Subcolumn>
<Subcolumn>
<d>5</d>
</Subcolumn>
<Subcolumn>
<d>6</d>
</Subcolumn>
<Subcolumn>
<d>7</d>
</Subcolumn>
<Subcolumn>
<d>8</d>
</Subcolumn>
<Subcolumn>
<d>9</d>
</Subcolumn>
<Subcolumn>
<d>10</d>
</Subcolumn>
<Subcolumn>
<d>11</d>
</Subcolumn>
</SubColumnTitles>
<XColumn Width="51" Subcolumns="1" Decimals="15">
<Title></Title>
<Subcolumn></Subcolumn>
</XColumn>
<XAdvancedColumn Version="1" Width="51" Decimals="15" Subcolumns="1">
<Title></Title>
<Subcolumn></Subcolumn>
</XAdvancedColumn>
<YColumn Width="924" Decimals="9" Subcolumns="11">
<Title>Basal</Title>
<Subcolumn>
<d>0.314606742</d>
<d>0.417367416</d>
<d>0.525907865</d>
<d>0.528583146</d>
<d>0.559661798</d>
<d>0.524468539</d>
<d>0.420605618</d>
<d>0.573492135</d>
<d>0.483239326</d>
<d>0.462914607</d>
<d>0.519082022</d>
<d>0.580758427</d>
<d>0.444748315</d>
<d>0.467661798</d>
<d>0.430147191</d>
<d>0.534868539</d>
<d>0.483052809</d>
<d>0.421905618</d>
<d></d>
<d></d>
<d></d>
<d></d>
<d></d>
<d></d>
<d></d>
<d></d>
<d></d>
<d></d>
</Subcolumn>
<Subcolumn>
<d>0.172255397</d>
<d>0.340880512</d>
<d>0.470896015</d>
<d>0.528960439</d>
<d>0.630309773</d>
<d>0.599227722</d>
<d>0.603677653</d>
<d>0.644137575</d>
<d>0.673952113</d>
<d>0.674008096</d>
<d>0.570448151</d>
<d>0.517255684</d>
<d>0.599981339</d>
<d>0.568349506</d>
<d>0.515108234</d>
<d>0.551811553</d>
<d>0.575941663</d>
<d>0.597508039</d>
<d>0.476026355</d>
<d>0.487581821</d>
<d></d>
<d></d>
<d></d>
<d></d>
<d></d>
<d></d>
<d></d>
<d></d>
</Subcolumn>
<Subcolumn>
<d>0.697289288</d>
<d>0.74392632</d>
<d>0.689491269</d>
<d>0.642257668</d>
<d>0.699706557</d>
<d>0.645250201</d>
<d>0.687879756</d>
<d>0.653360063</d>
<d>0.683521698</d>
<d>0.646267081</d>
<d>0.641049033</d>
<d>0.701627977</d>
<d>0.613587457</d>
<d>0.539690287</d>
<d>0.525109194</d>
<d>0.599564194</d>
<d>0.660307776</d>
<d>0.62972583</d>
<d>0.575747891</d>
<d></d>
<d></d>
<d></d>
<d></d>
<d></d>
<d></d>
<d></d>
<d></d>
<d></d>
</Subcolumn>
<Subcolumn>
<d>0.127835144</d>
<d>0.299439443</d>
<d>0.266593801</d>
<d>0.307569758</d>
<d>0.404324983</d>
<d>0.448752489</d>
<d>0.382228678</d>
<d>0.400152763</d>
<d>0.393888841</d>
<d>0.397722297</d>
<d>0.53374688</d>
<d>0.650939748</d>
<d>0.548436736</d>
<d>0.617472507</d>
<d>0.458356104</d>
<d>0.447216869</d>
<d>0.530833837</d>
<d>0.40197761</d>
<d>0.386811568</d>
<d>0.45167512</d>
<d>0.500714279</d>
<d>0.507280211</d>
<d>0.51911455</d>
<d>0.527449401</d>
<d>0.518489756</d>
<d>0.469629566</d>
<d>0.457317443</d>
<d>0.470209618</d>
</Subcolumn>
<Subcolumn>
<d>0.121005312</d>
<d>0.224237969</d>
<d>0.395235113</d>
<d>0.603619874</d>
<d>0.800949287</d>
<d>0.752937404</d>
<d>0.708965586</d>
<d>0.788632458</d>
<d>0.739042969</d>
<d>0.685799119</d>
<d>0.760943418</d>
<d>0.716569257</d>
<d>0.639413245</d>
<d>0.671724689</d>
<d>0.653192725</d>
<d>0.697725705</d>
<d>0.717517637</d>
<d>0.489708498</d>
<d>0.640296584</d>
<d>0.654939739</d>
<d>0.583980712</d>
<d>0.481806851</d>
<d></d>
<d></d>
<d></d>
<d></d>
<d></d>
<d></d>
</Subcolumn>
<Subcolumn>
<d>0.686092438</d>
<d>0.689139313</d>
<d>0.591494325</d>
<d>0.641158062</d>
<d>0.680042351</d>
<d>0.727674318</d>
<d>0.729221145</d>
<d>0.599794484</d>
<d>0.593317148</d>
<d>0.59433849</d>
<d>0.647460756</d>
<d>0.623304065</d>
<d>0.71160884</d>
<d>0.787025992</d>
<d>0.792750186</d>
<d>0.805681469</d>
<d>0.63821722</d>
<d></d>
<d></d>
<d></d>
<d></d>
<d></d>
<d></d>
<d></d>
<d></d>
<d></d>
<d></d>
<d></d>
</Subcolumn>
<Subcolumn>
<d>0.561102222</d>
<d>0.591602653</d>
<d>0.536895186</d>
<d>0.588628811</d>
<d>0.741340926</d>
<d>0.554926478</d>
<d>0.469466989</d>
<d>0.505625502</d>
<d>0.59338008</d>
<d>0.356685442</d>
<d>0.481233846</d>
<d>0.561509474</d>
<d>0.389354262</d>
<d>0.392275613</d>
<d>0.422917225</d>
<d>0.644625003</d>
<d></d>
<d></d>
<d></d>
<d></d>
<d></d>
<d></d>
<d></d>
<d></d>
<d></d>
<d></d>
<d></d>
<d></d>
</Subcolumn>
<Subcolumn>
<d>0.34898837</d>
<d>0.551101495</d>
<d>0.766486647</d>
<d>0.687011525</d>
<d>0.789240689</d>
<d>0.519359257</d>
<d>0.614715095</d>
<d>0.678292051</d>
<d>0.552661473</d>
<d>0.607724858</d>
<d>0.555271906</d>
<d>0.527302233</d>
<d>0.510873605</d>
<d>0.675624035</d>
<d>0.359609831</d>
<d></d>
<d></d>
<d></d>
<d></d>
<d></d>
<d></d>
<d></d>
<d></d>
<d></d>
<d></d>
<d></d>
<d></d>
<d></d>
</Subcolumn>
<Subcolumn>
<d>0.767853883</d>
<d>0.758585033</d>
<d>0.803666588</d>
<d>0.804507814</d>
<d>0.678955173</d>
<d>0.738361468</d>
<d>0.632610925</d>
<d>0.602485458</d>
<d>0.582894946</d>
<d>0.547925173</d>
<d>0.607119882</d>
<d>0.567517392</d>
<d>0.613651759</d>
<d>0.613230293</d>
<d>0.535707765</d>
<d>0.453760692</d>
<d>0.614283106</d>
<d></d>
<d></d>
<d></d>
<d></d>
<d></d>
<d></d>
<d></d>
<d></d>
<d></d>
<d></d>
<d></d>
</Subcolumn>
<Subcolumn>
<d>0.331531532</d>
<d>0.450946306</d>
<d>0.436036036</d>
<d>0.557252613</d>
<d>0.523243243</d>
<d>0.548648649</d>
<d>0.515855856</d>
<d>0.516036036</d>
<d>0.534774775</d>
<d>0.54928</d>
<d>0.524324324</d>
<d>0.398783423</d>
<d>0.366846847</d>
<d>0.452343063</d>
<d>0.352252252</d>
<d>0.320044685</d>
<d></d>
<d></d>
<d></d>
<d></d>
<d></d>
<d></d>
<d></d>
<d></d>
<d></d>
<d></d>
<d></d>
<d></d>
</Subcolumn>
<Subcolumn>
<d>0.349813943</d>
<d>0.523485634</d>
<d>0.524777759</d>
<d>0.618261162</d>
<d>0.624415701</d>
<d>0.685010035</d>
<d>0.643371244</d>
<d>0.639853428</d>
<d>0.591583477</d>
<d>0.499997814</d>
<d>0.561656894</d>
<d>0.47978294</d>
<d>0.494643474</d>
<d>0.460914851</d>
<d>0.386496307</d>
<d></d>
<d></d>
<d></d>
<d></d>
<d></d>
<d></d>
<d></d>
<d></d>
<d></d>
<d></d>
<d></d>
<d></d>
<d></d>
</Subcolumn>
</YColumn>
<YColumn Width="924" Decimals="9" Subcolumns="11">
<Title>Apical</Title>
<Subcolumn>
<d>0.904406742</d>
<d>0.876311236</d>
<d>0.916792135</d>
<d>0.790904494</d>
<d>0.768102247</d>
<d>0.742176404</d>
<d>0.889044944</d>
<d>1</d>
<d>0.97907191</d>
<d>0.914755056</d>
<d>0.80538427</d>
<d>0.886433708</d>
<d>0.783766292</d>
<d>0.611802247</d>
<d>0.749802247</d>
<d>0.866074157</d>
<d></d>
<d></d>
<d></d>
<d></d>
<d></d>
<d></d>
<d></d>
<d></d>
<d></d>
<d></d>
<d></d>
</Subcolumn>
<Subcolumn>
<d>0.632626608</d>
<d>0.62468994</d>
<d>0.71604559</d>
<d>0.599321027</d>
<d>0.650169384</d>
<d>0.643992593</d>
<d>0.621496038</d>
<d>0.594704582</d>
<d>0.692089171</d>
<d>0.696243397</d>
<d>0.725472267</d>
<d>0.774517685</d>
<d>0.818164332</d>
<d>1</d>
<d>0.974389929</d>
<d>0.98712678</d>
<d>0.913084233</d>
<d>0.788466066</d>
<d></d>
<d></d>
<d></d>
<d></d>
<d></d>
<d></d>
<d></d>
<d></d>
<d></d>
</Subcolumn>
<Subcolumn>
<d>0.690479096</d>
<d>0.7366687</d>
<d>0.830237175</d>
<d>0.646743562</d>
<d>0.742068819</d>
<d>0.682148426</d>
<d>0.640169674</d>
<d>0.725537252</d>
<d>0.694360673</d>
<d>0.847665534</d>
<d>0.847409861</d>
<d>0.805586062</d>
<d>0.817093272</d>
<d>0.854905721</d>
<d>0.881278751</d>
<d>0.951056103</d>
<d>1</d>
<d>0.83438411</d>
<d></d>
<d></d>
<d></d>
<d></d>
<d></d>
<d></d>
<d></d>
<d></d>
<d></d>
</Subcolumn>
<Subcolumn>
<d>0.708978501</d>
<d>0.570063246</d>
<d>0.613774876</d>
<d>0.627124061</d>
<d>0.637379635</d>
<d>0.688633538</d>
<d>0.653424544</d>
<d>0.682406369</d>
<d>0.669619658</d>
<d>0.754433483</d>
<d>0.704309323</d>
<d>0.775467158</d>
<d>0.690944158</d>
<d>0.830151836</d>
<d>0.788317785</d>
<d>0.872519599</d>
<d>0.81042208</d>
<d>0.766922976</d>
<d>0.800043464</d>
<d>0.80289259</d>
<d>0.690122818</d>
<d>0.702567569</d>
<d>0.872516403</d>
<d>1</d>
<d>0.929435001</d>
<d>0.97804751</d>
<d>0.998117628</d>
</Subcolumn>
<Subcolumn>
<d>0.646021648</d>
<d>0.582126305</d>
<d>0.652084014</d>
<d>0.719722958</d>
<d>0.668536199</d>
<d>0.845768142</d>
<d>0.763345373</d>
<d>0.72512282</d>
<d>0.863707179</d>
<d>0.756314965</d>
<d>0.76650815</d>
<d>0.886666425</d>
<d>0.761427439</d>
<d>0.833912646</d>
<d>0.851000109</d>
<d>0.820984741</d>
<d>0.85085944</d>
<d>0.792946298</d>
<d>1</d>
<d>0.892920887</d>
<d>0.820399378</d>
<d></d>
<d></d>
<d></d>
<d></d>
<d></d>
<d></d>
</Subcolumn>
<Subcolumn>
<d>0.848626178</d>
<d>0.814831447</d>
<d>0.853821769</d>
<d>0.886733935</d>
<d>0.855073887</d>
<d>0.967875281</d>
<d>1</d>
<d>0.750747295</d>
<d>0.936065541</d>
<d>0.892018406</d>
<d>0.884462033</d>
<d>0.846103229</d>
<d>0.806604575</d>
<d>0.868259337</d>
<d>0.807900354</d>
<d>0.815185409</d>
<d>0.810836518</d>
<d></d>
<d></d>
<d></d>
<d></d>
<d></d>
<d></d>
<d></d>
<d></d>
<d></d>
<d></d>
</Subcolumn>
<Subcolumn>
<d>0.526203474</d>
<d>0.456816849</d>
<d>0.67681779</d>
<d>0.75513861</d>
<d>0.597148515</d>
<d>0.719056117</d>
<d>0.808723873</d>
<d>0.994213407</d>
<d>0.923197776</d>
<d>0.926363478</d>
<d>0.859445703</d>
<d>1</d>
<d>0.832288356</d>
<d>0.689221769</d>
<d>0.652679535</d>
<d></d>
<d></d>
<d></d>
<d></d>
<d></d>
<d></d>
<d></d>
<d></d>
<d></d>
<d></d>
<d></d>
<d></d>
</Subcolumn>
<Subcolumn>
<d>0.334370992</d>
<d>0.554921172</d>
<d>0.525326958</d>
<d>0.697357286</d>
<d>0.743013689</d>
<d>0.417130094</d>
<d>0.657724421</d>
<d>0.623614298</d>
<d>0.842377658</d>
<d>0.722458274</d>
<d>1</d>
<d>0.994768664</d>
<d>0.727120759</d>
<d>0.561485643</d>
<d>0.750324995</d>
<d></d>
<d></d>
<d></d>
<d></d>
<d></d>
<d></d>
<d></d>
<d></d>
<d></d>
<d></d>
<d></d>
<d></d>
</Subcolumn>
<Subcolumn>
<d>0.700443137</d>
<d>0.88729782</d>
<d>0.628819433</d>
<d>0.789763313</d>
<d>0.788708794</d>
<d>0.769749628</d>
<d>0.869603054</d>
<d>0.690119768</d>
<d>0.753529142</d>
<d>0.85443538</d>
<d>0.801980722</d>
<d>0.942491157</d>
<d>0.805140867</d>
<d>0.852539634</d>
<d>1</d>
<d>0.930905095</d>
<d></d>
<d></d>
<d></d>
<d></d>
<d></d>
<d></d>
<d></d>
<d></d>
<d></d>
<d></d>
<d></d>
</Subcolumn>
<Subcolumn>
<d>0.743783784</d>
<d>0.629278559</d>
<d>0.645585586</d>
<d>0.691936577</d>
<d>0.631351351</d>
<d>0.697386667</d>
<d>0.672972973</d>
<d>0.761125766</d>
<d>0.725045045</d>
<d>0.703919279</d>
<d>0.773873874</d>
<d>0.899775135</d>
<d>0.965765766</d>
<d>0.998647928</d>
<d>1</d>
<d>0.943739099</d>
<d>0.879279279</d>
<d></d>
<d></d>
<d></d>
<d></d>
<d></d>
<d></d>
<d></d>
<d></d>
<d></d>
<d></d>
</Subcolumn>
<Subcolumn>
<d>0.550504388</d>
<d>0.677585234</d>
<d>0.716899949</d>
<d>0.779398582</d>
<d>0.783299008</d>
<d>0.78284425</d>
<d>0.737493058</d>
<d>0.827777851</d>
<d>0.889528757</d>
<d>0.946119907</d>
<d>1</d>
<d>0.932276021</d>
<d>0.791080182</d>
<d></d>
<d></d>
<d></d>
<d></d>
<d></d>
<d></d>
<d></d>
<d></d>
<d></d>
<d></d>
<d></d>
<d></d>
<d></d>
<d></d>
</Subcolumn>
</YColumn>
</Table>
<Table ID="Table64" XFormat="none" TableType="OneWay" EVFormat="AsteriskAfterNumber">
<Title>Copy of 32-cells</Title>
<RowTitlesColumn Width="84">
<Subcolumn></Subcolumn>
</RowTitlesColumn>
<YColumn Width="84" Decimals="9" Subcolumns="1">
<Title>Basal</Title>
<Subcolumn>
<d>0.314606742</d>
<d>0.417367416</d>
<d>0.525907865</d>
<d>0.528583146</d>
<d>0.559661798</d>
<d>0.524468539</d>
<d>0.420605618</d>
<d>0.573492135</d>
<d>0.483239326</d>
<d>0.462914607</d>
<d>0.519082022</d>
<d>0.580758427</d>
<d>0.444748315</d>
<d>0.467661798</d>
<d>0.430147191</d>
<d>0.534868539</d>
<d>0.483052809</d>
<d>0.421905618</d>
<d>0.172255397</d>
<d>0.340880512</d>
<d>0.470896015</d>
<d>0.528960439</d>
<d>0.630309773</d>
<d>0.599227722</d>
<d>0.603677653</d>
<d>0.644137575</d>
<d>0.673952113</d>
<d>0.674008096</d>
<d>0.570448151</d>
<d>0.517255684</d>
<d>0.599981339</d>
<d>0.568349506</d>
<d>0.515108234</d>
<d>0.551811553</d>
<d>0.575941663</d>
<d>0.597508039</d>
<d>0.476026355</d>
<d>0.487581821</d>
<d>0.697289288</d>
<d>0.74392632</d>
<d>0.689491269</d>
<d>0.642257668</d>
<d>0.699706557</d>
<d>0.645250201</d>
<d>0.687879756</d>
<d>0.653360063</d>
<d>0.683521698</d>
<d>0.646267081</d>
<d>0.641049033</d>
<d>0.701627977</d>
<d>0.613587457</d>
<d>0.539690287</d>
<d>0.525109194</d>
<d>0.599564194</d>
<d>0.660307776</d>
<d>0.62972583</d>
<d>0.575747891</d>
<d>0.127835144</d>
<d>0.299439443</d>
<d>0.266593801</d>
<d>0.307569758</d>
<d>0.404324983</d>
<d>0.448752489</d>
<d>0.382228678</d>
<d>0.400152763</d>
<d>0.393888841</d>
<d>0.397722297</d>
<d>0.53374688</d>
<d>0.650939748</d>
<d>0.548436736</d>
<d>0.617472507</d>
<d>0.458356104</d>
<d>0.447216869</d>
<d>0.530833837</d>
<d>0.40197761</d>
<d>0.386811568</d>
<d>0.45167512</d>
<d>0.500714279</d>
<d>0.507280211</d>
<d>0.51911455</d>
<d>0.527449401</d>
<d>0.518489756</d>
<d>0.469629566</d>
<d>0.457317443</d>
<d>0.470209618</d>
<d>0.121005312</d>
<d>0.224237969</d>
<d>0.395235113</d>
<d>0.603619874</d>
<d>0.800949287</d>
<d>0.752937404</d>
<d>0.708965586</d>
<d>0.788632458</d>
<d>0.739042969</d>
<d>0.685799119</d>
<d>0.760943418</d>
<d>0.716569257</d>
<d>0.639413245</d>
<d>0.671724689</d>
<d>0.653192725</d>
<d>0.697725705</d>
<d>0.717517637</d>
<d>0.489708498</d>
<d>0.640296584</d>
<d>0.654939739</d>
<d>0.583980712</d>
<d>0.481806851</d>
<d>0.686092438</d>
<d>0.689139313</d>
<d>0.591494325</d>
<d>0.641158062</d>
<d>0.680042351</d>
<d>0.727674318</d>
<d>0.729221145</d>
<d>0.599794484</d>
<d>0.593317148</d>
<d>0.59433849</d>
<d>0.647460756</d>
<d>0.623304065</d>
<d>0.71160884</d>
<d>0.787025992</d>
<d>0.792750186</d>
<d>0.805681469</d>
<d>0.63821722</d>
<d>0.561102222</d>
<d>0.591602653</d>
<d>0.536895186</d>
<d>0.588628811</d>
<d>0.741340926</d>
<d>0.554926478</d>
<d>0.469466989</d>
<d>0.505625502</d>
<d>0.59338008</d>
<d>0.356685442</d>
<d>0.481233846</d>
<d>0.561509474</d>
<d>0.389354262</d>
<d>0.392275613</d>
<d>0.422917225</d>
<d>0.644625003</d>
<d>0.34898837</d>
<d>0.551101495</d>
<d>0.766486647</d>
<d>0.687011525</d>
<d>0.789240689</d>
<d>0.519359257</d>
<d>0.614715095</d>
<d>0.678292051</d>
<d>0.552661473</d>
<d>0.607724858</d>
<d>0.555271906</d>
<d>0.527302233</d>
<d>0.510873605</d>
<d>0.675624035</d>
<d>0.359609831</d>
<d>0.767853883</d>
<d>0.758585033</d>
<d>0.803666588</d>
<d>0.804507814</d>
<d>0.678955173</d>
<d>0.738361468</d>
<d>0.632610925</d>
<d>0.602485458</d>
<d>0.582894946</d>
<d>0.547925173</d>
<d>0.607119882</d>
<d>0.567517392</d>
<d>0.613651759</d>
<d>0.613230293</d>
<d>0.535707765</d>
<d>0.453760692</d>
<d>0.614283106</d>
<d>0.331531532</d>
<d>0.450946306</d>
<d>0.436036036</d>
<d>0.557252613</d>
<d>0.523243243</d>
<d>0.548648649</d>
<d>0.515855856</d>
<d>0.516036036</d>
<d>0.534774775</d>
<d>0.54928</d>
<d>0.524324324</d>
<d>0.398783423</d>
<d>0.366846847</d>
<d>0.452343063</d>
<d>0.352252252</d>
<d>0.320044685</d>
<d>0.349813943</d>
<d>0.523485634</d>
<d>0.524777759</d>
<d>0.618261162</d>
<d>0.624415701</d>
<d>0.685010035</d>
<d>0.643371244</d>
<d>0.639853428</d>
<d>0.591583477</d>
<d>0.499997814</d>
<d>0.561656894</d>
<d>0.47978294</d>
<d>0.494643474</d>
<d>0.460914851</d>
<d>0.386496307</d>
</Subcolumn>
</YColumn>
<YColumn Width="84" Decimals="9" Subcolumns="1">
<Title>Apical</Title>
<Subcolumn>
<d>0.904406742</d>
<d>0.876311236</d>
<d>0.916792135</d>
<d>0.790904494</d>
<d>0.768102247</d>
<d>0.742176404</d>
<d>0.889044944</d>
<d>1</d>
<d>0.97907191</d>
<d>0.914755056</d>
<d>0.80538427</d>
<d>0.886433708</d>
<d>0.783766292</d>
<d>0.611802247</d>
<d>0.749802247</d>
<d>0.866074157</d>
<d>0.632626608</d>
<d>0.62468994</d>
<d>0.71604559</d>
<d>0.599321027</d>
<d>0.650169384</d>
<d>0.643992593</d>
<d>0.621496038</d>
<d>0.594704582</d>
<d>0.692089171</d>
<d>0.696243397</d>
<d>0.725472267</d>
<d>0.774517685</d>
<d>0.818164332</d>
<d>1</d>
<d>0.974389929</d>
<d>0.98712678</d>
<d>0.913084233</d>
<d>0.788466066</d>
<d>0.690479096</d>
<d>0.7366687</d>
<d>0.830237175</d>
<d>0.646743562</d>
<d>0.742068819</d>
<d>0.682148426</d>
<d>0.640169674</d>
<d>0.725537252</d>
<d>0.694360673</d>
<d>0.847665534</d>
<d>0.847409861</d>
<d>0.805586062</d>
<d>0.817093272</d>
<d>0.854905721</d>
<d>0.881278751</d>
<d>0.951056103</d>
<d>1</d>
<d>0.83438411</d>
<d>0.708978501</d>
<d>0.570063246</d>
<d>0.613774876</d>
<d>0.627124061</d>
<d>0.637379635</d>
<d>0.688633538</d>
<d>0.653424544</d>
<d>0.682406369</d>
<d>0.669619658</d>
<d>0.754433483</d>
<d>0.704309323</d>
<d>0.775467158</d>
<d>0.690944158</d>
<d>0.830151836</d>
<d>0.788317785</d>
<d>0.872519599</d>
<d>0.81042208</d>
<d>0.766922976</d>
<d>0.800043464</d>
<d>0.80289259</d>
<d>0.690122818</d>
<d>0.702567569</d>
<d>0.872516403</d>
<d>1</d>
<d>0.929435001</d>
<d>0.97804751</d>
<d>0.998117628</d>
<d>0.646021648</d>
<d>0.582126305</d>
<d>0.652084014</d>
<d>0.719722958</d>
<d>0.668536199</d>
<d>0.845768142</d>
<d>0.763345373</d>
<d>0.72512282</d>
<d>0.863707179</d>
<d>0.756314965</d>
<d>0.76650815</d>
<d>0.886666425</d>
<d>0.761427439</d>
<d>0.833912646</d>
<d>0.851000109</d>
<d>0.820984741</d>
<d>0.85085944</d>
<d>0.792946298</d>
<d>1</d>
<d>0.892920887</d>
<d>0.820399378</d>
<d>0.848626178</d>
<d>0.814831447</d>
<d>0.853821769</d>
<d>0.886733935</d>
<d>0.855073887</d>
<d>0.967875281</d>
<d>1</d>
<d>0.750747295</d>
<d>0.936065541</d>
<d>0.892018406</d>
<d>0.884462033</d>
<d>0.846103229</d>
<d>0.806604575</d>
<d>0.868259337</d>
<d>0.807900354</d>
<d>0.815185409</d>
<d>0.810836518</d>
<d>0.526203474</d>
<d>0.456816849</d>
<d>0.67681779</d>
<d>0.75513861</d>
<d>0.597148515</d>
<d>0.719056117</d>
<d>0.808723873</d>
<d>0.994213407</d>
<d>0.923197776</d>
<d>0.926363478</d>
<d>0.859445703</d>
<d>1</d>
<d>0.832288356</d>
<d>0.689221769</d>
<d>0.652679535</d>
<d>0.334370992</d>
<d>0.554921172</d>
<d>0.525326958</d>
<d>0.697357286</d>
<d>0.743013689</d>
<d>0.417130094</d>
<d>0.657724421</d>
<d>0.623614298</d>
<d>0.842377658</d>
<d>0.722458274</d>
<d>1</d>
<d>0.994768664</d>
<d>0.727120759</d>
<d>0.561485643</d>
<d>0.750324995</d>
<d>0.700443137</d>
<d>0.88729782</d>
<d>0.628819433</d>
<d>0.789763313</d>
<d>0.788708794</d>
<d>0.769749628</d>
<d>0.869603054</d>
<d>0.690119768</d>
<d>0.753529142</d>
<d>0.85443538</d>
<d>0.801980722</d>
<d>0.942491157</d>
<d>0.805140867</d>
<d>0.852539634</d>
<d>1</d>
<d>0.930905095</d>
<d>0.743783784</d>
<d>0.629278559</d>
<d>0.645585586</d>
<d>0.691936577</d>
<d>0.631351351</d>
<d>0.697386667</d>
<d>0.672972973</d>
<d>0.761125766</d>
<d>0.725045045</d>
<d>0.703919279</d>
<d>0.773873874</d>
<d>0.899775135</d>
<d>0.965765766</d>
<d>0.998647928</d>
<d>1</d>
<d>0.943739099</d>
<d>0.879279279</d>
<d>0.550504388</d>
<d>0.677585234</d>
<d>0.716899949</d>
<d>0.779398582</d>
<d>0.783299008</d>
<d>0.78284425</d>
<d>0.737493058</d>
<d>0.827777851</d>
<d>0.889528757</d>
<d>0.946119907</d>
<d>1</d>
<d>0.932276021</d>
<d>0.791080182</d>
</Subcolumn>
</YColumn>
</Table>
<Table ID="Table19" XFormat="none" YFormat="replicates" Replicates="13" TableType="TwoWay" EVFormat="AsteriskAfterNumber">
<Title>60-cells</Title>
<RowTitlesColumn Width="84">
<Subcolumn></Subcolumn>
</RowTitlesColumn>
<SubColumnTitles OwnSet="0">
<Subcolumn>
<d>1</d>
</Subcolumn>
<Subcolumn>
<d>2</d>
</Subcolumn>
<Subcolumn>
<d>3</d>
</Subcolumn>
<Subcolumn>
<d>4</d>
</Subcolumn>
<Subcolumn>
<d>5</d>
</Subcolumn>
<Subcolumn>
<d>6</d>
</Subcolumn>
<Subcolumn>
<d>7</d>
</Subcolumn>
<Subcolumn>
<d>8</d>
</Subcolumn>
<Subcolumn>
<d>9</d>
</Subcolumn>
<Subcolumn>
<d>10</d>
</Subcolumn>
<Subcolumn>
<d>11</d>
</Subcolumn>
<Subcolumn>
<d>12</d>
</Subcolumn>
<Subcolumn>
<d>13</d>
</Subcolumn>
</SubColumnTitles>
<YColumn Width="1092" Decimals="9" Subcolumns="13">
<Title>Basal</Title>
<Subcolumn>
<d>0.384507427</d>
<d>0.421204816</d>
<d>0.537003072</d>
<d>0.498337005</d>
<d>0.612512641</d>
<d>0.512667597</d>
<d>0.443786937</d>
<d>0.456525668</d>
<d>0.400929739</d>
<d>0.420032068</d>
<d>0.515751347</d>
<d>0.524368158</d>
<d>0.385084188</d>
<d>0.355584778</d>
<d>0.532685054</d>
<d>0.554898048</d>
<d></d>
<d></d>
<d></d>
<d></d>
</Subcolumn>
<Subcolumn>
<d>0.523019391</d>
<d>0.505635534</d>
<d>0.440928229</d>
<d>0.348945462</d>
<d>0.401910982</d>
<d>0.403185842</d>
<d>0.472070765</d>
<d>0.373412963</d>
<d>0.389995947</d>
<d>0.445033931</d>
<d>0.464977314</d>
<d>0.474904876</d>
<d>0.408608899</d>
<d>0.504017443</d>
<d>0.455798324</d>
<d>0.404045555</d>
<d>0.357758339</d>
<d>0.490579113</d>
<d>0.469900234</d>
<d>0.525372978</d>
</Subcolumn>
<Subcolumn>
<d>0.356892183</d>
<d>0.302585089</d>
<d>0.394702927</d>
<d>0.600038862</d>
<d>0.410981176</d>
<d>0.338361548</d>
<d>0.352153448</d>
<d>0.329086316</d>
<d>0.196481043</d>
<d>0.242615306</d>
<d>0.444786797</d>
<d>0.373551117</d>
<d>0.316380955</d>
<d>0.21177189</d>
<d>0.178001959</d>
<d>0.190671631</d>
<d>0.359457841</d>
<d>0.352712579</d>
<d>0.203004239</d>
<d>0.176086638</d>
</Subcolumn>
<Subcolumn>
<d>0.694152536</d>
<d>0.767441547</d>
<d>0.739633025</d>
<d>0.645671766</d>
<d>0.649572518</d>
<d>0.64815529</d>
<d>0.610937144</d>
<d>0.583011002</d>
<d>0.614157241</d>
<d>0.635641262</d>
<d>0.624725713</d>
<d>0.660993255</d>
<d>0.558353162</d>
<d>0.523981042</d>
<d>0.539655392</d>
<d>0.577135772</d>
<d>0.61009452</d>
<d>0.524598066</d>
<d>0.427677019</d>
<d></d>
</Subcolumn>
<Subcolumn>
<d>0.5</d>
<d>0.554590323</d>
<d>0.669609677</d>
<d>0.703680645</d>
<d>0.725537097</d>
<d>0.697698387</d>
<d>0.685153226</d>
<d>0.577185484</d>
<d>0.569745161</d>
<d>0.598708065</d>
<d>0.602080645</d>
<d>0.540140323</d>
<d>0.546737097</d>
<d>0.51445</d>
<d>0.488630645</d>
<d>0.465645161</d>
<d>0.425591935</d>
<d></d>
<d></d>
<d></d>
</Subcolumn>
<Subcolumn>
<d>0.690925841</d>
<d>0.689148626</d>
<d>0.702347229</d>
<d>0.622591356</d>
<d>0.655780746</d>
<d>0.622132658</d>
<d>0.621796791</d>
<d>0.623524106</d>
<d>0.579212728</d>
<d>0.486699678</d>
<d>0.58349263</d>
<d>0.53293797</d>
<d>0.474648779</d>
<d>0.469979272</d>
<d>0.427978658</d>
<d>0.500418394</d>
<d>0.538463458</d>
<d>0.476161139</d>
<d>0.483314141</d>
<d></d>
</Subcolumn>
<Subcolumn>
<d>0.333333333</d>
<d>0.434623077</d>
<d>0.4358</d>
<d>0.532051282</d>
<d>0.587812821</d>
<d>0.365728205</d>
<d>0.286984615</d>
<d>0.306953846</d>
<d>0.333748718</d>
<d>0.362248718</d>
<d>0.309246154</d>
<d>0.358420513</d>
<d>0.479189744</d>
<d>0.488433333</d>
<d>0.300494872</d>
<d>0.298574359</d>
<d></d>
<d></d>
<d></d>
<d></d>
</Subcolumn>
<Subcolumn>
<d>0.392651313</d>
<d>0.470159227</d>
<d>0.46191355</d>
<d>0.413173888</d>
<d>0.399974987</d>
<d>0.338238566</d>
<d>0.344291213</d>
<d>0.354913159</d>
<d>0.426029583</d>
<d>0.407753845</d>
<d>0.416783371</d>
<d>0.467343772</d>
<d>0.493331472</d>
<d>0.396691258</d>
<d>0.462954803</d>
<d>0.394759996</d>
<d></d>
<d></d>
<d></d>
<d></d>
</Subcolumn>
<Subcolumn>
<d>0.644045108</d>
<d>0.615027719</d>
<d>0.616620152</d>
<d>0.482080392</d>
<d>0.523149002</d>
<d>0.548650662</d>
<d>0.560158864</d>
<d>0.582958061</d>
<d>0.574642302</d>
<d>0.629650069</d>
<d>0.663250281</d>
<d>0.602276889</d>
<d>0.631171783</d>
<d>0.586981449</d>
<d></d>
<d></d>
<d></d>
<d></d>
<d></d>
<d></d>
</Subcolumn>
<Subcolumn>
<d>0.414475048</d>
<d>0.416340185</d>
<d>0.423627051</d>
<d>0.457274531</d>
<d>0.280870003</d>
<d>0.302912181</d>
<d>0.342614943</d>
<d>0.286643048</d>
<d>0.306966141</d>
<d>0.359008418</d>
<d>0.378192691</d>
<d>0.277143675</d>
<d></d>
<d></d>
<d></d>
<d></d>
<d></d>
<d></d>
<d></d>
<d></d>
</Subcolumn>
<Subcolumn>
<d>0.320625862</d>
<d>0.290402294</d>
<d>0.530393042</d>
<d>0.49615936</d>
<d>0.475934739</d>
<d>0.50483</d>
<d>0.411287404</d>
<d>0.37391159</d>
<d>0.333661593</d>
<d>0.377081205</d>
<d>0.414447859</d>
<d>0.407691814</d>
<d>0.274822167</d>
<d></d>
<d></d>
<d></d>
<d></d>
<d></d>
<d></d>
<d></d>
</Subcolumn>
<Subcolumn>
<d>0.414070578</d>
<d>0.458718889</d>
<d>0.527527067</d>
<d>0.482718879</d>
<d>0.513283039</d>
<d>0.523608349</d>
<d>0.559547375</d>
<d>0.560377816</d>
<d>0.51481625</d>
<d>0.348913122</d>
<d>0.500519314</d>
<d>0.433975871</d>
<d>0.403259886</d>
<d>0.544114044</d>
<d>0.462687065</d>
<d>0.393766167</d>
<d>0.421582509</d>
<d></d>
<d></d>
<d></d>
</Subcolumn>
<Subcolumn>
<d>0.513613614</d>
<d>0.424622922</d>
<d>0.538585223</d>
<d>0.607522157</d>
<d>0.52704889</d>
<d>0.521199402</d>
<d>0.396552511</d>
<d>0.447210507</d>
<d>0.461563155</d>
<d>0.454508101</d>
<d>0.426526146</d>
<d>0.370653545</d>
<d>0.380236719</d>
<d></d>
<d></d>
<d></d>
<d></d>
<d></d>
<d></d>
<d></d>
</Subcolumn>
</YColumn>
<YColumn Width="1092" Decimals="9" Subcolumns="13">
<Title>Apical</Title>
<Subcolumn>
<d>0.673441688</d>
<d>0.774447943</d>
<d>0.834104271</d>
<d>0.916208142</d>
<d>0.923283078</d>
<d>0.863430652</d>
<d>0.806269778</d>
<d>0.797491474</d>
<d>0.838518416</d>
<d>0.901085464</d>
<d>0.968904884</d>
<d>0.873477831</d>
<d>1</d>
<d>0.99014123</d>
<d></d>
<d></d>
<d></d>
<d></d>
<d></d>
</Subcolumn>
<Subcolumn>
<d>0.820205547</d>
<d>0.728729455</d>
<d>0.742334497</d>
<d>0.604741171</d>
<d>0.865070804</d>
<d>0.970943004</d>
<d>0.951532447</d>
<d>0.876976033</d>
<d>0.91051792</d>
<d>1</d>
<d>0.962306646</d>
<d>0.984972999</d>
<d>0.927136861</d>
<d>0.934053793</d>
<d></d>
<d></d>
<d></d>
<d></d>
<d></d>
</Subcolumn>
<Subcolumn>
<d>0.747165681</d>
<d>0.861763761</d>
<d>1</d>
<d>0.986323098</d>
<d>0.889641006</d>
<d>0.715326933</d>
<d>0.702621571</d>
<d></d>
<d></d>
<d></d>
<d></d>
<d></d>
<d></d>
<d></d>
<d></d>
<d></d>
<d></d>
<d></d>
<d></d>
</Subcolumn>
<Subcolumn>
<d>0.691298798</d>
<d>0.803151838</d>
<d>0.802164599</d>
<d>0.7011924</d>
<d>0.719637575</d>
<d>0.772827013</d>
<d>0.771625744</d>
<d>0.824522095</d>
<d>0.718368819</d>
<d>0.75239579</d>
<d>0.804503507</d>
<d>0.871545145</d>
<d>0.759318034</d>
<d>0.765590473</d>
<d>0.87172254</d>
<d>0.950574411</d>
<d>1</d>
<d>0.869686359</d>
<d></d>
</Subcolumn>
<Subcolumn>
<d>0.685104839</d>
<d>0.688025806</d>
<d>0.599354839</d>
<d>0.640522581</d>
<d>0.729922581</d>
<d>0.740341935</d>
<d>0.703719355</d>
<d>0.688448387</d>
<d>0.704543548</d>
<d>0.79356129</d>
<d>0.753467742</d>
<d>0.791603226</d>
<d>0.81718871</d>
<d>0.917004839</d>
<d>0.927453226</d>
<d>0.881406452</d>
<d>1</d>
<d></d>
<d></d>
</Subcolumn>
<Subcolumn>
<d>0.621372639</d>
<d>0.556103178</d>
<d>0.53039306</d>
<d>0.550913558</d>
<d>0.630803777</d>
<d>0.753216644</d>
<d>0.72799785</d>
<d>0.818963995</d>
<d>0.854135959</d>
<d>0.777168739</d>
<d>0.74745509</d>
<d>0.885596115</d>
<d>0.924069169</d>
<d>0.924587364</d>
<d>1</d>
<d>0.902792492</d>
<d>0.965806848</d>
<d>0.996672041</d>
<d>0.882849685</d>
</Subcolumn>
<Subcolumn>
<d>0.748317949</d>
<d>0.540523077</d>
<d>0.446041026</d>
<d>0.606620513</d>
<d>0.482389744</d>
<d>0.691187179</d>
<d>0.845594872</d>
<d>0.7096</d>
<d>0.671169231</d>
<d>0.891433333</d>
<d>0.907379487</d>
<d>0.718097436</d>
<d>0.936553846</d>
<d>0.923371795</d>
<d>1</d>
<d></d>
<d></d>
<d></d>
<d></d>
</Subcolumn>
<Subcolumn>
<d>0.683976772</d>
<d>0.770645097</d>
<d>0.833777611</d>
<d>0.844161057</d>
<d>0.816089397</d>
<d>0.783925437</d>
<d>0.758454001</d>
<d>0.796565901</d>
<d>0.919275253</d>
<d>0.81154773</d>
<d>0.967879668</d>
<d>0.996394879</d>
<d>1</d>
<d>0.937641155</d>
<d>0.808937326</d>
<d></d>
<d></d>
<d></d>
<d></d>
</Subcolumn>
<Subcolumn>
<d>0.72677586</d>
<d>0.613646179</d>
<d>0.692013841</d>
<d>0.756020559</d>
<d>0.772881912</d>
<d>0.737131095</d>
<d>0.773949007</d>
<d>0.79380075</d>
<d>0.727450213</d>
<d>0.7087085</d>
<d>0.826534658</d>
<d>0.912668746</d>
<d>1</d>
<d>0.818533345</d>
<d>0.827558816</d>
<d></d>
<d></d>
<d></d>
<d></d>
</Subcolumn>
<Subcolumn>
<d>0.582773628</d>
<d>0.582390732</d>
<d>0.596190777</d>
<d>0.735452419</d>
<d>0.686291731</d>
<d>0.814751364</d>
<d>0.890436482</d>
<d>0.840614607</d>
<d>1</d>
<d>0.997921704</d>
<d>0.893211491</d>
<d></d>
<d></d>
<d></d>
<d></d>
<d></d>
<d></d>
<d></d>
<d></d>
</Subcolumn>
<Subcolumn>
<d>0.550026795</d>
<d>0.643901467</d>
<d>0.533406925</d>
<d>0.699715559</d>
<d>0.839764935</d>
<d>0.734860734</d>
<d>0.660196131</d>
<d>0.784951654</d>
<d>0.858603995</d>
<d>0.63699656</d>
<d>0.932936521</d>
<d>1</d>
<d>0.778662807</d>
<d></d>
<d></d>
<d></d>
<d></d>
<d></d>
<d></d>
</Subcolumn>
<Subcolumn>
<d>0.729123079</d>
<d>0.857503361</d>
<d>0.776392686</d>
<d>0.754158246</d>
<d>0.803781154</d>
<d>0.8099163</d>
<d>0.848999962</d>
<d>0.869969186</d>
<d>1</d>
<d>0.897326599</d>
<d>0.868266896</d>
<d>0.842836061</d>
<d>0.923660338</d>
<d>0.801999501</d>
<d></d>
<d></d>
<d></d>
<d></d>
<d></d>
</Subcolumn>
<Subcolumn>
<d>0.706003287</d>
<d>0.778195961</d>
<d>0.80833652</d>
<d>0.878588875</d>
<d>1</d>
<d>0.998039708</d>
<d>0.831690245</d>
<d>0.859640813</d>
<d>0.838341542</d>
<d>0.757136376</d>
<d>0.870408152</d>
<d>0.849508358</d>
<d>0.784687466</d>
<d></d>
<d></d>
<d></d>
<d></d>
<d></d>
<d></d>
</Subcolumn>
</YColumn>
</Table>
<Table ID="Table68" XFormat="none" TableType="OneWay" EVFormat="AsteriskAfterNumber">
<Title>Copy of 60-cells</Title>
<RowTitlesColumn Width="84">
<Subcolumn></Subcolumn>
</RowTitlesColumn>
<SubColumnTitles OwnSet="0">
<Subcolumn></Subcolumn>
</SubColumnTitles>
<YColumn Width="84" Decimals="9" Subcolumns="1">
<Title>Basal</Title>
<Subcolumn>
<d>0.384507427</d>
<d>0.421204816</d>
<d>0.537003072</d>
<d>0.498337005</d>
<d>0.612512641</d>
<d>0.512667597</d>
<d>0.443786937</d>
<d>0.456525668</d>
<d>0.400929739</d>
<d>0.420032068</d>
<d>0.515751347</d>
<d>0.524368158</d>
<d>0.385084188</d>
<d>0.355584778</d>
<d>0.532685054</d>
<d>0.554898048</d>
<d>0.523019391</d>
<d>0.505635534</d>
<d>0.440928229</d>
<d>0.348945462</d>
<d>0.401910982</d>
<d>0.403185842</d>
<d>0.472070765</d>
<d>0.373412963</d>
<d>0.389995947</d>
<d>0.445033931</d>
<d>0.464977314</d>
<d>0.474904876</d>
<d>0.408608899</d>
<d>0.504017443</d>
<d>0.455798324</d>
<d>0.404045555</d>
<d>0.357758339</d>
<d>0.490579113</d>
<d>0.469900234</d>
<d>0.525372978</d>
<d>0.356892183</d>
<d>0.302585089</d>
<d>0.394702927</d>
<d>0.600038862</d>
<d>0.410981176</d>
<d>0.338361548</d>
<d>0.352153448</d>
<d>0.329086316</d>
<d>0.196481043</d>
<d>0.242615306</d>
<d>0.444786797</d>
<d>0.373551117</d>
<d>0.316380955</d>
<d>0.21177189</d>
<d>0.178001959</d>
<d>0.190671631</d>
<d>0.359457841</d>
<d>0.352712579</d>
<d>0.203004239</d>
<d>0.176086638</d>
<d>0.694152536</d>
<d>0.767441547</d>
<d>0.739633025</d>
<d>0.645671766</d>
<d>0.649572518</d>
<d>0.64815529</d>
<d>0.610937144</d>
<d>0.583011002</d>
<d>0.614157241</d>
<d>0.635641262</d>
<d>0.624725713</d>
<d>0.660993255</d>
<d>0.558353162</d>
<d>0.523981042</d>
<d>0.539655392</d>
<d>0.577135772</d>
<d>0.61009452</d>
<d>0.524598066</d>
<d>0.427677019</d>
<d>0.5</d>
<d>0.554590323</d>
<d>0.669609677</d>
<d>0.703680645</d>
<d>0.725537097</d>
<d>0.697698387</d>
<d>0.685153226</d>
<d>0.577185484</d>
<d>0.569745161</d>
<d>0.598708065</d>
<d>0.602080645</d>
<d>0.540140323</d>
<d>0.546737097</d>
<d>0.51445</d>
<d>0.488630645</d>
<d>0.465645161</d>
<d>0.425591935</d>
<d>0.690925841</d>
<d>0.689148626</d>
<d>0.702347229</d>
<d>0.622591356</d>
<d>0.655780746</d>
<d>0.622132658</d>
<d>0.621796791</d>
<d>0.623524106</d>
<d>0.579212728</d>
<d>0.486699678</d>
<d>0.58349263</d>
<d>0.53293797</d>
<d>0.474648779</d>
<d>0.469979272</d>
<d>0.427978658</d>
<d>0.500418394</d>
<d>0.538463458</d>
<d>0.476161139</d>
<d>0.483314141</d>
<d>0.333333333</d>
<d>0.434623077</d>
<d>0.4358</d>
<d>0.532051282</d>
<d>0.587812821</d>
<d>0.365728205</d>
<d>0.286984615</d>
<d>0.306953846</d>
<d>0.333748718</d>
<d>0.362248718</d>
<d>0.309246154</d>
<d>0.358420513</d>
<d>0.479189744</d>
<d>0.488433333</d>
<d>0.300494872</d>
<d>0.298574359</d>
<d>0.392651313</d>
<d>0.470159227</d>
<d>0.46191355</d>
<d>0.413173888</d>
<d>0.399974987</d>
<d>0.338238566</d>
<d>0.344291213</d>
<d>0.354913159</d>
<d>0.426029583</d>
<d>0.407753845</d>
<d>0.416783371</d>
<d>0.467343772</d>
<d>0.493331472</d>
<d>0.396691258</d>
<d>0.462954803</d>
<d>0.394759996</d>
<d>0.644045108</d>
<d>0.615027719</d>
<d>0.616620152</d>
<d>0.482080392</d>
<d>0.523149002</d>
<d>0.548650662</d>
<d>0.560158864</d>
<d>0.582958061</d>
<d>0.574642302</d>
<d>0.629650069</d>
<d>0.663250281</d>
<d>0.602276889</d>
<d>0.631171783</d>
<d>0.586981449</d>
<d>0.414475048</d>
<d>0.416340185</d>
<d>0.423627051</d>
<d>0.457274531</d>
<d>0.280870003</d>
<d>0.302912181</d>
<d>0.342614943</d>
<d>0.286643048</d>
<d>0.306966141</d>
<d>0.359008418</d>
<d>0.378192691</d>
<d>0.277143675</d>
<d>0.320625862</d>
<d>0.290402294</d>
<d>0.530393042</d>
<d>0.49615936</d>
<d>0.475934739</d>
<d>0.50483</d>
<d>0.411287404</d>
<d>0.37391159</d>
<d>0.333661593</d>
<d>0.377081205</d>
<d>0.414447859</d>
<d>0.407691814</d>
<d>0.274822167</d>
<d>0.414070578</d>
<d>0.458718889</d>
<d>0.527527067</d>
<d>0.482718879</d>
<d>0.513283039</d>
<d>0.523608349</d>
<d>0.559547375</d>
<d>0.560377816</d>
<d>0.51481625</d>
<d>0.348913122</d>
<d>0.500519314</d>
<d>0.433975871</d>
<d>0.403259886</d>
<d>0.544114044</d>
<d>0.462687065</d>
<d>0.393766167</d>
<d>0.421582509</d>
<d>0.513613614</d>
<d>0.424622922</d>
<d>0.538585223</d>
<d>0.607522157</d>
<d>0.52704889</d>
<d>0.521199402</d>
<d>0.396552511</d>
<d>0.447210507</d>
<d>0.461563155</d>
<d>0.454508101</d>
<d>0.426526146</d>
<d>0.370653545</d>
<d>0.380236719</d>
</Subcolumn>
</YColumn>
<YColumn Width="84" Decimals="9" Subcolumns="1">
<Title>Apical</Title>
<Subcolumn>
<d>0.673441688</d>
<d>0.774447943</d>
<d>0.834104271</d>
<d>0.916208142</d>
<d>0.923283078</d>
<d>0.863430652</d>
<d>0.806269778</d>
<d>0.797491474</d>
<d>0.838518416</d>
<d>0.901085464</d>
<d>0.968904884</d>
<d>0.873477831</d>
<d>1</d>
<d>0.99014123</d>
<d>0.820205547</d>
<d>0.728729455</d>
<d>0.742334497</d>
<d>0.604741171</d>
<d>0.865070804</d>
<d>0.970943004</d>
<d>0.951532447</d>
<d>0.876976033</d>
<d>0.91051792</d>
<d>1</d>
<d>0.962306646</d>
<d>0.984972999</d>
<d>0.927136861</d>
<d>0.934053793</d>
<d>0.747165681</d>
<d>0.861763761</d>
<d>1</d>
<d>0.986323098</d>
<d>0.889641006</d>
<d>0.715326933</d>
<d>0.702621571</d>
<d>0.691298798</d>
<d>0.803151838</d>
<d>0.802164599</d>
<d>0.7011924</d>
<d>0.719637575</d>
<d>0.772827013</d>
<d>0.771625744</d>
<d>0.824522095</d>
<d>0.718368819</d>
<d>0.75239579</d>
<d>0.804503507</d>
<d>0.871545145</d>
<d>0.759318034</d>
<d>0.765590473</d>
<d>0.87172254</d>
<d>0.950574411</d>
<d>1</d>
<d>0.869686359</d>
<d>0.685104839</d>
<d>0.688025806</d>
<d>0.599354839</d>
<d>0.640522581</d>
<d>0.729922581</d>
<d>0.740341935</d>
<d>0.703719355</d>
<d>0.688448387</d>
<d>0.704543548</d>
<d>0.79356129</d>
<d>0.753467742</d>
<d>0.791603226</d>
<d>0.81718871</d>
<d>0.917004839</d>
<d>0.927453226</d>
<d>0.881406452</d>
<d>1</d>
<d>0.621372639</d>
<d>0.556103178</d>
<d>0.53039306</d>
<d>0.550913558</d>
<d>0.630803777</d>
<d>0.753216644</d>
<d>0.72799785</d>
<d>0.818963995</d>
<d>0.854135959</d>
<d>0.777168739</d>
<d>0.74745509</d>
<d>0.885596115</d>
<d>0.924069169</d>
<d>0.924587364</d>
<d>1</d>
<d>0.902792492</d>
<d>0.965806848</d>
<d>0.996672041</d>
<d>0.882849685</d>
<d>0.748317949</d>
<d>0.540523077</d>
<d>0.446041026</d>
<d>0.606620513</d>
<d>0.482389744</d>
<d>0.691187179</d>
<d>0.845594872</d>
<d>0.7096</d>
<d>0.671169231</d>
<d>0.891433333</d>
<d>0.907379487</d>
<d>0.718097436</d>
<d>0.936553846</d>
<d>0.923371795</d>
<d>1</d>
<d>0.683976772</d>
<d>0.770645097</d>
<d>0.833777611</d>
<d>0.844161057</d>
<d>0.816089397</d>
<d>0.783925437</d>
<d>0.758454001</d>
<d>0.796565901</d>
<d>0.919275253</d>
<d>0.81154773</d>
<d>0.967879668</d>
<d>0.996394879</d>
<d>1</d>
<d>0.937641155</d>
<d>0.808937326</d>
<d>0.72677586</d>
<d>0.613646179</d>
<d>0.692013841</d>
<d>0.756020559</d>
<d>0.772881912</d>
<d>0.737131095</d>
<d>0.773949007</d>
<d>0.79380075</d>
<d>0.727450213</d>
<d>0.7087085</d>
<d>0.826534658</d>
<d>0.912668746</d>
<d>1</d>
<d>0.818533345</d>
<d>0.827558816</d>
<d>0.582773628</d>
<d>0.582390732</d>
<d>0.596190777</d>
<d>0.735452419</d>
<d>0.686291731</d>
<d>0.814751364</d>
<d>0.890436482</d>
<d>0.840614607</d>
<d>1</d>
<d>0.997921704</d>
<d>0.893211491</d>
<d>0.550026795</d>
<d>0.643901467</d>
<d>0.533406925</d>
<d>0.699715559</d>
<d>0.839764935</d>
<d>0.734860734</d>
<d>0.660196131</d>
<d>0.784951654</d>
<d>0.858603995</d>
<d>0.63699656</d>
<d>0.932936521</d>
<d>1</d>
<d>0.778662807</d>
<d>0.729123079</d>
<d>0.857503361</d>
<d>0.776392686</d>
<d>0.754158246</d>
<d>0.803781154</d>
<d>0.8099163</d>
<d>0.848999962</d>
<d>0.869969186</d>
<d>1</d>
<d>0.897326599</d>
<d>0.868266896</d>
<d>0.842836061</d>
<d>0.923660338</d>
<d>0.801999501</d>
<d>0.706003287</d>
<d>0.778195961</d>
<d>0.80833652</d>
<d>0.878588875</d>
<d>1</d>
<d>0.998039708</d>
<d>0.831690245</d>
<d>0.859640813</d>
<d>0.838341542</d>
<d>0.757136376</d>
<d>0.870408152</d>
<d>0.849508358</d>
<d>0.784687466</d>
</Subcolumn>
</YColumn>
</Table>
<Table ID="Table21" XFormat="numbers" YFormat="replicates" Replicates="10" TableType="XY" EVFormat="AsteriskAfterNumber">
<Title>3hpf</Title>
<RowTitlesColumn Width="84">
<Subcolumn></Subcolumn>
</RowTitlesColumn>
<SubColumnTitles OwnSet="0">
<Subcolumn>
<d>1</d>
</Subcolumn>
<Subcolumn>
<d>2</d>
</Subcolumn>
<Subcolumn>
<d>3</d>
</Subcolumn>
<Subcolumn>
<d>4</d>
</Subcolumn>
<Subcolumn>
<d>5</d>
</Subcolumn>
<Subcolumn>
<d>6</d>
</Subcolumn>
<Subcolumn>
<d>7</d>
</Subcolumn>
<Subcolumn>
<d>8</d>
</Subcolumn>
<Subcolumn>
<d>9</d>
</Subcolumn>
<Subcolumn>
<d>10</d>
</Subcolumn>
</SubColumnTitles>
<XColumn Width="51" Subcolumns="1" Decimals="15">
<Title></Title>
<Subcolumn></Subcolumn>
</XColumn>
<XAdvancedColumn Version="1" Width="51" Decimals="15" Subcolumns="1">
<Title></Title>
<Subcolumn></Subcolumn>
</XAdvancedColumn>
<YColumn Width="840" Decimals="9" Subcolumns="10">
<Title>Basal</Title>
<Subcolumn>
<d>0.220307569</d>
<d>0.320631804</d>
<d>0.289282995</d>
<d>0.260973472</d>
<d>0.27015934</d>
<d>0.346110853</d>
<d>0.366014205</d>
<d>0.415991456</d>
<d>0.452972476</d>
<d>0.456127663</d>
<d>0.492562704</d>
<d>0.477454394</d>
<d></d>
<d></d>
<d></d>
</Subcolumn>
<Subcolumn>
<d>0.232524004</d>
<d>0.442869579</d>
<d>0.409932554</d>
<d>0.450249309</d>
<d>0.430483316</d>
<d>0.594358968</d>
<d>0.520545676</d>
<d>0.54071132</d>
<d>0.454357718</d>
<d>0.38276939</d>
<d>0.393000446</d>
<d>0.408493811</d>
<d>0.441205579</d>
<d>0.479038688</d>
<d>0.499326407</d>
</Subcolumn>
<Subcolumn>
<d>0.7485742</d>
<d>0.656816158</d>
<d>0.56099866</d>
<d>0.647312385</d>
<d>0.616812665</d>
<d>0.586573386</d>
<d>0.584758094</d>
<d>0.555209687</d>
<d></d>
<d></d>
<d></d>
<d></d>
<d></d>
<d></d>
<d></d>
</Subcolumn>
<Subcolumn>
<d>0.583812652</d>
<d>0.510693925</d>
<d>0.553731071</d>
<d>0.550568329</d>
<d>0.459399638</d>
<d>0.409204441</d>
<d>0.41017027</d>
<d></d>
<d></d>
<d></d>
<d></d>
<d></d>
<d></d>
<d></d>
<d></d>
</Subcolumn>
<Subcolumn>
<d>0.583596215</d>
<d>0.623028391</d>
<d>0.630914826</d>
<d>0.61829653</d>
<d>0.599369085</d>
<d>0.583596215</d>
<d>0.482649842</d>
<d>0.533123028</d>
<d>0.599369085</d>
<d></d>
<d></d>
<d></d>
<d></d>
<d></d>
<d></d>
</Subcolumn>
<Subcolumn>
<d>0.724805752</d>
<d>0.681653453</d>
<d>0.598708001</d>
<d>0.603875207</d>
<d>0.628423719</d>
<d>0.519121694</d>
<d>0.53100719</d>
<d>0.555297408</d>
<d>0.632557747</d>
<d>0.6418603</d>
<d>0.572351428</d>
<d></d>
<d></d>
<d></d>
<d></d>
</Subcolumn>
<Subcolumn>
<d>0.525456681</d>
<d>0.649035617</d>
<d>0.716992422</d>
<d>0.63941298</d>
<d>0.610073852</d>
<d>0.560789405</d>
<d>0.639589262</d>
<d>0.608478837</d>
<d>0.612819787</d>
<d>0.675028773</d>
<d></d>
<d></d>
<d></d>
<d></d>
<d></d>
</Subcolumn>
<Subcolumn>
<d>0.392609775</d>
<d>0.356635269</d>
<d>0.405433392</d>
<d>0.38103433</d>
<d>0.347494005</d>
<d>0.347266618</d>
<d>0.362156344</d>
<d>0.420629026</d>
<d>0.352550491</d>
<d>0.399213799</d>
<d></d>
<d></d>
<d></d>
<d></d>
<d></d>
</Subcolumn>
<Subcolumn>
<d>0.75</d>
<d>0.755785938</d>
<d>0.673110938</d>
<d>0.65674375</d>
<d>0.803242188</d>
<d>0.664084375</d>
<d>0.797546875</d>
<d>0.707403125</d>
<d>0.597245313</d>
<d>0.623384375</d>
<d></d>
<d></d>
<d></d>
<d></d>
<d></d>
</Subcolumn>
<Subcolumn>
<d>0.694115061</d>
<d>0.718809031</d>
<d>0.781371935</d>
<d>0.69916888</d>
<d>0.659769587</d>
<d>0.661506527</d>
<d>0.632614814</d>
<d>0.635928387</d>
<d>0.669549999</d>
<d>0.720625299</d>
<d>0.637557905</d>
<d>0.550887724</d>
<d>0.538082953</d>
<d></d>
<d></d>
</Subcolumn>
</YColumn>
<YColumn Width="840" Decimals="9" Subcolumns="10">
<Title>Apical</Title>
<Subcolumn>
<d>0.757221059</d>
<d>0.735022677</d>
<d>0.77660621</d>
<d>0.83593408</d>
<d>0.821726158</d>
<d>0.861276156</d>
<d>0.823729999</d>
<d>0.871947663</d>
<d>0.933719031</d>
<d>0.988542091</d>
<d>1</d>
<d>0.842915914</d>
<d></d>
<d></d>
<d></d>
</Subcolumn>
<Subcolumn>
<d>0.704610224</d>
<d>0.755085373</d>
<d>0.769217019</d>
<d>0.787146073</d>
<d>0.901348785</d>
<d>0.977208288</d>
<d>1</d>
<d>0.946794148</d>
<d>0.78007589</d>
<d>0.783786101</d>
<d>0.892379171</d>
<d>0.685454606</d>
<d>0.397129201</d>
<d>0.196192129</d>
<d>0.101729252</d>
</Subcolumn>
<Subcolumn>
<d>0.657379148</d>
<d>0.6971222</d>
<d>0.756350015</d>
<d>0.853118825</d>
<d>0.954898404</d>
<d>0.887074463</d>
<d>1</d>
<d>0.842145975</d>
<d></d>
<d></d>
<d></d>
<d></d>
<d></d>
<d></d>
<d></d>
</Subcolumn>
<Subcolumn>
<d>0.949453247</d>
<d>0.921917596</d>
<d>0.880725806</d>
<d>0.922445566</d>
<d>1</d>
<d>0.977383606</d>
<d>0.875718978</d>
<d></d>
<d></d>
<d></d>
<d></d>
<d></d>
<d></d>
<d></d>
<d></d>
</Subcolumn>
<Subcolumn>
<d>0.640378549</d>
<d>0.678233438</d>
<d>0.780757098</d>
<d>0.977917981</d>
<d>1</d>
<d>0.876971609</d>
<d>0.876971609</d>
<d>0.820189274</d>
<d></d>
<d></d>
<d></d>
<d></d>
<d></d>
<d></d>
<d></d>
</Subcolumn>
<Subcolumn>
<d>0.677519425</d>
<d>0.806976321</d>
<d>0.89638177</d>
<d>0.842118858</d>
<d>0.850386914</d>
<d>0.914470286</d>
<d>0.872867753</d>
<d>0.886820923</d>
<d>0.819638019</d>
<d>1</d>
<d>0.935658334</d>
<d></d>
<d></d>
<d></d>
<d></d>
</Subcolumn>
<Subcolumn>
<d>0.762737663</d>
<d>0.8340201</d>
<d>0.902858315</d>
<d>1</d>
<d>0.884163922</d>
<d>0.790956382</d>
<d>0.877400786</d>
<d>0.873575123</d>
<d>0.891223687</d>
<d>0.661058405</d>
<d></d>
<d></d>
<d></d>
<d></d>
<d></d>
</Subcolumn>
<Subcolumn>
<d>0.654163136</d>
<d>0.782580886</d>
<d>0.78184965</d>
<d>0.675236466</d>
<d>0.737329337</d>
<d>0.769762177</d>
<d>0.845480244</d>
<d>1</d>
<d>0.910318112</d>
<d>0.932448216</d>
<d></d>
<d></d>
<d></d>
<d></d>
<d></d>
</Subcolumn>
<Subcolumn>
<d>0.780951563</d>
<d>0.798257813</d>
<d>0.985890625</d>
<d>0.851589063</d>
<d>0.984289063</d>
<d>0.888759375</d>
<d>0.88944375</d>
<d>0.83414375</d>
<d>0.957517188</d>
<d>1</d>
<d></d>
<d></d>
<d></d>
<d></d>
<d></d>
</Subcolumn>
<Subcolumn>
<d>0.751959636</d>
<d>0.785093714</d>
<d>0.804857814</d>
<d>0.752351315</d>
<d>0.686377331</d>
<d>0.739212708</d>
<d>0.794966674</d>
<d>0.860552284</d>
<d>0.866913353</d>
<d>0.914169367</d>
<d>1</d>
<d>0.991592944</d>
<d>0.908960199</d>
<d></d>
<d></d>
</Subcolumn>
</YColumn>
</Table>
<Table ID="Table72" XFormat="none" TableType="OneWay" EVFormat="AsteriskAfterNumber">
<Title>Copy of 3hpf</Title>
<RowTitlesColumn Width="84">
<Subcolumn></Subcolumn>
</RowTitlesColumn>
<YColumn Width="84" Decimals="9" Subcolumns="1">
<Title>Basal</Title>
<Subcolumn>
<d>0.220307569</d>
<d>0.320631804</d>
<d>0.289282995</d>
<d>0.260973472</d>
<d>0.27015934</d>
<d>0.346110853</d>
<d>0.366014205</d>
<d>0.415991456</d>
<d>0.452972476</d>
<d>0.456127663</d>
<d>0.492562704</d>
<d>0.477454394</d>
<d>0.232524004</d>
<d>0.442869579</d>
<d>0.409932554</d>
<d>0.450249309</d>
<d>0.430483316</d>
<d>0.594358968</d>
<d>0.520545676</d>
<d>0.54071132</d>
<d>0.454357718</d>
<d>0.38276939</d>
<d>0.393000446</d>
<d>0.408493811</d>
<d>0.441205579</d>
<d>0.479038688</d>
<d>0.499326407</d>
<d>0.7485742</d>
<d>0.656816158</d>
<d>0.56099866</d>
<d>0.647312385</d>
<d>0.616812665</d>
<d>0.586573386</d>
<d>0.584758094</d>
<d>0.555209687</d>
<d>0.583812652</d>
<d>0.510693925</d>
<d>0.553731071</d>
<d>0.550568329</d>
<d>0.459399638</d>
<d>0.409204441</d>
<d>0.41017027</d>
<d>0.583596215</d>
<d>0.623028391</d>
<d>0.630914826</d>
<d>0.61829653</d>
<d>0.599369085</d>
<d>0.583596215</d>
<d>0.482649842</d>
<d>0.533123028</d>
<d>0.599369085</d>
<d>0.724805752</d>
<d>0.681653453</d>
<d>0.598708001</d>
<d>0.603875207</d>
<d>0.628423719</d>
<d>0.519121694</d>
<d>0.53100719</d>
<d>0.555297408</d>
<d>0.632557747</d>
<d>0.6418603</d>
<d>0.572351428</d>
<d>0.525456681</d>
<d>0.649035617</d>
<d>0.716992422</d>
<d>0.63941298</d>
<d>0.610073852</d>
<d>0.560789405</d>
<d>0.639589262</d>
<d>0.608478837</d>
<d>0.612819787</d>
<d>0.675028773</d>
<d>0.392609775</d>
<d>0.356635269</d>
<d>0.405433392</d>
<d>0.38103433</d>
<d>0.347494005</d>
<d>0.347266618</d>
<d>0.362156344</d>
<d>0.420629026</d>
<d>0.352550491</d>
<d>0.399213799</d>
<d>0.75</d>
<d>0.755785938</d>
<d>0.673110938</d>
<d>0.65674375</d>
<d>0.803242188</d>
<d>0.664084375</d>
<d>0.797546875</d>
<d>0.707403125</d>
<d>0.597245313</d>
<d>0.623384375</d>
<d>0.694115061</d>
<d>0.718809031</d>
<d>0.781371935</d>
<d>0.69916888</d>
<d>0.659769587</d>
<d>0.661506527</d>
<d>0.632614814</d>
<d>0.635928387</d>
<d>0.669549999</d>
<d>0.720625299</d>
<d>0.637557905</d>
<d>0.550887724</d>
<d>0.538082953</d>
</Subcolumn>
</YColumn>
<YColumn Width="84" Decimals="9" Subcolumns="1">
<Title>Apical</Title>
<Subcolumn>
<d>0.757221059</d>
<d>0.735022677</d>
<d>0.77660621</d>
<d>0.83593408</d>
<d>0.821726158</d>
<d>0.861276156</d>
<d>0.823729999</d>
<d>0.871947663</d>
<d>0.933719031</d>
<d>0.988542091</d>
<d>1</d>
<d>0.842915914</d>
<d>0.704610224</d>
<d>0.755085373</d>
<d>0.769217019</d>
<d>0.787146073</d>
<d>0.901348785</d>
<d>0.977208288</d>
<d>1</d>
<d>0.946794148</d>
<d>0.78007589</d>
<d>0.783786101</d>
<d>0.892379171</d>
<d>0.685454606</d>
<d>0.397129201</d>
<d>0.196192129</d>
<d>0.101729252</d>
<d>0.657379148</d>
<d>0.6971222</d>
<d>0.756350015</d>
<d>0.853118825</d>
<d>0.954898404</d>
<d>0.887074463</d>
<d>1</d>
<d>0.842145975</d>
<d>0.949453247</d>
<d>0.921917596</d>
<d>0.880725806</d>
<d>0.922445566</d>
<d>1</d>
<d>0.977383606</d>
<d>0.875718978</d>
<d>0.640378549</d>
<d>0.678233438</d>
<d>0.780757098</d>
<d>0.977917981</d>
<d>1</d>
<d>0.876971609</d>
<d>0.876971609</d>
<d>0.820189274</d>
<d>0.677519425</d>
<d>0.806976321</d>
<d>0.89638177</d>
<d>0.842118858</d>
<d>0.850386914</d>
<d>0.914470286</d>
<d>0.872867753</d>
<d>0.886820923</d>
<d>0.819638019</d>
<d>1</d>
<d>0.935658334</d>
<d>0.762737663</d>
<d>0.8340201</d>
<d>0.902858315</d>
<d>1</d>
<d>0.884163922</d>
<d>0.790956382</d>
<d>0.877400786</d>
<d>0.873575123</d>
<d>0.891223687</d>
<d>0.661058405</d>
<d>0.654163136</d>
<d>0.782580886</d>
<d>0.78184965</d>
<d>0.675236466</d>
<d>0.737329337</d>
<d>0.769762177</d>
<d>0.845480244</d>
<d>1</d>
<d>0.910318112</d>
<d>0.932448216</d>
<d>0.780951563</d>
<d>0.798257813</d>
<d>0.985890625</d>
<d>0.851589063</d>
<d>0.984289063</d>
<d>0.888759375</d>
<d>0.88944375</d>
<d>0.83414375</d>
<d>0.957517188</d>
<d>1</d>
<d>0.751959636</d>
<d>0.785093714</d>
<d>0.804857814</d>
<d>0.752351315</d>
<d>0.686377331</d>
<d>0.739212708</d>
<d>0.794966674</d>
<d>0.860552284</d>
<d>0.866913353</d>
<d>0.914169367</d>
<d>1</d>
<d>0.991592944</d>
<d>0.908960199</d>
</Subcolumn>
</YColumn>
</Table>
<Table ID="Table22" XFormat="numbers" YFormat="replicates" Replicates="6" TableType="XY" EVFormat="AsteriskAfterNumber">
<Title>4hpf</Title>
<RowTitlesColumn Width="84">
<Subcolumn></Subcolumn>
</RowTitlesColumn>
<SubColumnTitles OwnSet="0">
<Subcolumn>
<d>1</d>
</Subcolumn>
<Subcolumn>
<d>2</d>
</Subcolumn>
<Subcolumn>
<d>3</d>
</Subcolumn>
<Subcolumn>
<d>4</d>
</Subcolumn>
<Subcolumn>
<d>5</d>
</Subcolumn>
<Subcolumn>
<d>6</d>
</Subcolumn>
</SubColumnTitles>
<XColumn Width="51" Subcolumns="1" Decimals="15">
<Title></Title>
<Subcolumn></Subcolumn>
</XColumn>
<XAdvancedColumn Version="1" Width="51" Decimals="15" Subcolumns="1">
<Title></Title>
<Subcolumn></Subcolumn>
</XAdvancedColumn>
<YColumn Width="504" Decimals="9" Subcolumns="6">
<Title>Basal</Title>
<Subcolumn>
<d>0.50156057</d>
<d>0.471488431</d>
<d>0.538279103</d>
<d>0.588144255</d>
<d>0.628595831</d>
<d>0.567882641</d>
<d></d>
<d></d>
<d></d>
<d></d>
</Subcolumn>
<Subcolumn>
<d>0.386832765</d>
<d>0.388087209</d>
<d>0.480946414</d>
<d>0.424735469</d>
<d>0.455307691</d>
<d>0.397570138</d>
<d>0.41813997</d>
<d>0.459833634</d>
<d>0.566810854</d>
<d></d>
</Subcolumn>
<Subcolumn>
<d>0.632212269</d>
<d>0.698443529</d>
<d>0.681886592</d>
<d>0.709482657</d>
<d>0.798292676</d>
<d>0.612141285</d>
<d>0.788258062</d>
<d></d>
<d></d>
<d></d>
</Subcolumn>
<Subcolumn>
<d>0.660907698</d>
<d>0.587041544</d>
<d>0.606911539</d>
<d>0.681642706</d>
<d>0.63455692</d>
<d>0.524838466</d>
<d>0.571490775</d>
<d>0.742980771</d>
<d>0.794817317</d>
<d></d>
</Subcolumn>
<Subcolumn>
<d>0.549163467</d>
<d>0.720711151</d>
<d>0.561715775</d>
<d>0.646443853</d>
<d>0.722804248</d>
<d>0.606695401</d>
<d>0.759414623</d>
<d>0.619247709</d>
<d>0.676778074</d>
<d></d>
</Subcolumn>
<Subcolumn>
<d>0.430900755</d>
<d>0.404832337</d>
<d>0.430035722</d>
<d>0.451210185</d>
<d>0.36899863</d>
<d>0.475811386</d>
<d>0.412297692</d>
<d>0.396118446</d>
<d>0.406491304</d>
<d>0.454713408</d>
</Subcolumn>
</YColumn>
<YColumn Width="504" Decimals="9" Subcolumns="6">
<Title>Apical</Title>
<Subcolumn>
<d>0.791956975</d>
<d>0.793662281</d>
<d>1</d>
<d>0.939324068</d>
<d>0.691809659</d>
<d>0.386918154</d>
<d></d>
<d></d>
<d></d>
<d></d>
</Subcolumn>
<Subcolumn>
<d>0.883151637</d>
<d>0.879425609</d>
<d>0.84162514</d>
<d>0.900158463</d>
<d>0.957786874</d>
<d>0.95550318</d>
<d>1</d>
<d>0.609290618</d>
<d>0.30394003</d>
<d></d>
</Subcolumn>
<Subcolumn>
<d>0.762167013</d>
<d>0.832915078</d>
<d>0.892624015</d>
<d>0.843451949</d>
<d>1</d>
<d>0.921222839</d>
<d>0.860511144</d>
<d></d>
<d></d>
<d></d>
</Subcolumn>
<Subcolumn>
<d>0.627646547</d>
<d>0.516200014</d>
<d>0.682937307</d>
<d>0.943846172</d>
<d>0.860476553</d>
<d>0.838445001</d>
<d>1</d>
<d>0.873002698</d>
<d>0.524838466</d>
<d></d>
</Subcolumn>
<Subcolumn>
<d>0.78347269</d>
<d>0.760461172</d>
<d>0.706067315</d>
<d>0.878661547</d>
<d>0.895398481</d>
<d>0.847280778</d>
<d>1</d>
<d>0.833681921</d>
<d>0.753138469</d>
<d></d>
</Subcolumn>
<Subcolumn>
<d>0.876817324</d>
<d>0.96440652</d>
<d>0.945904719</d>
<d>1</d>
<d>0.783022079</d>
<d>0.7748996</d>
<d>0.843402048</d>
<d>0.73012578</d>
<d>0.734100839</d>
<d>0.635578614</d>
</Subcolumn>
</YColumn>
</Table>
<Table ID="Table76" XFormat="none" TableType="OneWay" EVFormat="AsteriskAfterNumber">
<Title>Copy of 4hpf</Title>
<RowTitlesColumn Width="84">
<Subcolumn></Subcolumn>
</RowTitlesColumn>
<YColumn Width="84" Decimals="9" Subcolumns="1">
<Title>Basal</Title>
<Subcolumn>
<d>0.50156057</d>
<d>0.471488431</d>
<d>0.538279103</d>
<d>0.588144255</d>
<d>0.628595831</d>
<d>0.567882641</d>
<d>0.386832765</d>
<d>0.388087209</d>
<d>0.480946414</d>
<d>0.424735469</d>
<d>0.455307691</d>
<d>0.397570138</d>
<d>0.41813997</d>
<d>0.459833634</d>
<d>0.566810854</d>
<d>0.632212269</d>
<d>0.698443529</d>
<d>0.681886592</d>
<d>0.709482657</d>
<d>0.798292676</d>
<d>0.612141285</d>
<d>0.788258062</d>
<d>0.660907698</d>
<d>0.587041544</d>
<d>0.606911539</d>
<d>0.681642706</d>
<d>0.63455692</d>
<d>0.524838466</d>
<d>0.571490775</d>
<d>0.742980771</d>
<d>0.794817317</d>
<d>0.549163467</d>
<d>0.720711151</d>
<d>0.561715775</d>
<d>0.646443853</d>
<d>0.722804248</d>
<d>0.606695401</d>
<d>0.759414623</d>
<d>0.619247709</d>
<d>0.676778074</d>
<d>0.430900755</d>
<d>0.404832337</d>
<d>0.430035722</d>
<d>0.451210185</d>
<d>0.36899863</d>
<d>0.475811386</d>
<d>0.412297692</d>
<d>0.396118446</d>
<d>0.406491304</d>
<d>0.454713408</d>
</Subcolumn>
</YColumn>
<YColumn Width="84" Decimals="9" Subcolumns="1">
<Title>Apical</Title>
<Subcolumn>
<d>0.791956975</d>
<d>0.793662281</d>
<d>1</d>
<d>0.939324068</d>
<d>0.691809659</d>
<d>0.386918154</d>
<d>0.883151637</d>
<d>0.879425609</d>
<d>0.84162514</d>
<d>0.900158463</d>
<d>0.957786874</d>
<d>0.95550318</d>
<d>1</d>
<d>0.609290618</d>
<d>0.30394003</d>
<d>0.762167013</d>
<d>0.832915078</d>
<d>0.892624015</d>
<d>0.843451949</d>
<d>1</d>
<d>0.921222839</d>
<d>0.860511144</d>
<d>0.627646547</d>
<d>0.516200014</d>
<d>0.682937307</d>
<d>0.943846172</d>
<d>0.860476553</d>
<d>0.838445001</d>
<d>1</d>
<d>0.873002698</d>
<d>0.524838466</d>
<d>0.78347269</d>
<d>0.760461172</d>
<d>0.706067315</d>
<d>0.878661547</d>
<d>0.895398481</d>
<d>0.847280778</d>
<d>1</d>
<d>0.833681921</d>
<d>0.753138469</d>
<d>0.876817324</d>
<d>0.96440652</d>
<d>0.945904719</d>
<d>1</d>
<d>0.783022079</d>
<d>0.7748996</d>
<d>0.843402048</d>
<d>0.73012578</d>
<d>0.734100839</d>
<d>0.635578614</d>
</Subcolumn>
</YColumn>
</Table>
<Table ID="Table23" XFormat="numbers" YFormat="replicates" Replicates="20" TableType="XY" EVFormat="AsteriskAfterNumber">
<Title>5hpf</Title>
<RowTitlesColumn Width="84">
<Subcolumn></Subcolumn>
</RowTitlesColumn>
<SubColumnTitles OwnSet="0">
<Subcolumn>
<d>1</d>
</Subcolumn>
<Subcolumn>
<d>2</d>
</Subcolumn>
<Subcolumn>
<d>3</d>
</Subcolumn>
<Subcolumn>
<d>4</d>
</Subcolumn>
<Subcolumn>
<d>5</d>
</Subcolumn>
<Subcolumn>
<d>6</d>
</Subcolumn>
<Subcolumn>
<d>7</d>
</Subcolumn>
<Subcolumn>
<d>8</d>
</Subcolumn>
<Subcolumn>
<d>9</d>
</Subcolumn>
<Subcolumn>
<d>10</d>
</Subcolumn>
<Subcolumn>
<d>11</d>
</Subcolumn>
<Subcolumn>
<d>12</d>
</Subcolumn>
<Subcolumn>
<d>13</d>
</Subcolumn>
<Subcolumn>
<d>14</d>
</Subcolumn>
<Subcolumn>
<d>15</d>
</Subcolumn>
<Subcolumn>
<d>16</d>
</Subcolumn>
<Subcolumn>
<d>17</d>
</Subcolumn>
<Subcolumn>
<d>18</d>
</Subcolumn>
<Subcolumn>
<d>19</d>
</Subcolumn>
<Subcolumn>
<d>20</d>
</Subcolumn>
</SubColumnTitles>
<XColumn Width="51" Subcolumns="1" Decimals="15">
<Title></Title>
<Subcolumn></Subcolumn>
</XColumn>
<XAdvancedColumn Version="1" Width="51" Decimals="15" Subcolumns="1">
<Title></Title>
<Subcolumn></Subcolumn>
</XAdvancedColumn>
<YColumn Width="1681" Decimals="9" Subcolumns="20">
<Title>Basal</Title>
<Subcolumn>
<d>0.375730064</d>
<d>0.387393004</d>
<d>0.498325218</d>
<d>0.580259421</d>
<d>0.579541359</d>
<d>0.541616279</d>
<d>0.515731261</d>
<d></d>
</Subcolumn>
<Subcolumn>
<d>0.667655786</d>
<d>0.534124629</d>
<d>0.677547478</d>
<d>0.661721068</d>
<d>0.707221068</d>
<d>0.697329377</d>
<d>0.673590504</d>
<d></d>
</Subcolumn>
<Subcolumn>
<d>0.48847409</d>
<d>0.481605313</d>
<d>0.502463157</d>
<d>0.601601571</d>
<d>0.478332537</d>
<d>0.520237378</d>
<d>0.60786859</d>
<d></d>
</Subcolumn>
<Subcolumn>
<d>0.457318182</d>
<d>0.46855158</d>
<d>0.42377909</d>
<d>0.416651163</d>
<d>0.434240244</d>
<d>0.462833024</d>
<d>0.459515388</d>
<d></d>
</Subcolumn>
<Subcolumn>
<d>0.385090188</d>
<d>0.36844549</d>
<d>0.429773853</d>
<d>0.399180088</d>
<d>0.394520497</d>
<d>0.343971358</d>
<d></d>
<d></d>
</Subcolumn>
<Subcolumn>
<d>0.432635813</d>
<d>0.323671599</d>
<d>0.497048307</d>
<d>0.382716618</d>
<d>0.391841047</d>
<d>0.457864063</d>
<d></d>
<d></d>
</Subcolumn>
<Subcolumn>
<d>0.507267547</d>
<d>0.576728444</d>
<d>0.56136951</d>
<d>0.533457583</d>
<d>0.63604305</d>
<d></d>
<d></d>
<d></d>
</Subcolumn>
<Subcolumn>
<d>0.281880708</d>
<d>0.357518698</d>
<d>0.361213898</d>
<d>0.315603037</d>
<d>0.282158318</d>
<d>0.340031844</d>
<d>0.32942715</d>
<d></d>
</Subcolumn>
<Subcolumn>
<d>0.293244003</d>
<d>0.399017978</d>
<d>0.406564698</d>
<d>0.353078717</d>
<d>0.426449229</d>
<d></d>
<d></d>
<d></d>
</Subcolumn>
<Subcolumn>
<d>0.553398058</d>
<d>0.533980583</d>
<d>0.611650485</d>
<d></d>
<d></d>
<d></d>
<d></d>
<d></d>
</Subcolumn>
<Subcolumn>
<d>0.432944733</d>
<d>0.431001729</d>
<d>0.420310618</d>
<d>0.532070709</d>
<d>0.472303345</d>
<d>0.510204376</d>
<d></d>
<d></d>
</Subcolumn>
<Subcolumn>
<d>0.309509265</d>
<d>0.326794543</d>
<d>0.310579515</d>
<d>0.413054775</d>
<d>0.482366931</d>
<d>0.363108125</d>
<d></d>
<d></d>
</Subcolumn>
<Subcolumn>
<d>0.457749702</d>
<d>0.282918743</d>
<d>0.369214371</d>
<d>0.467437648</d>
<d>0.458871189</d>
<d>0.460260787</d>
<d></d>
<d></d>
</Subcolumn>
<Subcolumn>
<d>0.45294837</d>
<d>0.283205969</d>
<d>0.313676453</d>
<d>0.520343853</d>
<d></d>
<d></d>
<d></d>
<d></d>
</Subcolumn>
<Subcolumn>
<d>0.254901961</d>
<d>0.29084902</d>
<d>0.222221569</d>
<d>0.200980392</d>
<d>0.248366667</d>
<d></d>
<d></d>
<d></d>
</Subcolumn>
<Subcolumn>
<d>0.390790374</d>
<d>0.362655095</d>
<d>0.223817045</d>
<d>0.339614746</d>
<d>0.379200182</d>
<d>0.447695965</d>
<d>0.401608754</d>
<d></d>
</Subcolumn>
<Subcolumn>
<d>0.368274712</d>
<d>0.461411387</d>
<d>0.266386252</d>
<d>0.354401277</d>
<d>0.346991064</d>
<d></d>
<d></d>
<d></d>
</Subcolumn>
<Subcolumn>
<d>0.240066554</d>
<d>0.349119556</d>
<d>0.315492695</d>
<d>0.300544859</d>
<d>0.252560171</d>
<d></d>
<d></d>
<d></d>
</Subcolumn>
<Subcolumn>
<d>0.463385128</d>
<d>0.390762748</d>
<d>0.473002024</d>
<d>0.518438591</d>
<d>0.524060445</d>
<d>0.410701549</d>
<d>0.399929499</d>
<d></d>
</Subcolumn>
<Subcolumn>
<d>0.377737157</d>
<d>0.4635032</d>
<d>0.375912523</d>
<d>0.301094288</d>
<d>0.259124405</d>
<d>0.388686608</d>
<d>0.257299771</d>
<d>0.399634416</d>
</Subcolumn>
</YColumn>
<YColumn Width="1681" Decimals="9" Subcolumns="20">
<Title>Apical</Title>
<Subcolumn>
<d>0.855079523</d>
<d>0.862112633</d>
<d>0.955473204</d>
<d>0.890040509</d>
<d>0.931604604</d>
<d>1</d>
<d>0.890619412</d>
<d></d>
</Subcolumn>
<Subcolumn>
<d>0.940652819</d>
<d>1</d>
<d>0.919881306</d>
<d></d>
<d></d>
<d></d>
<d></d>
<d></d>
</Subcolumn>
<Subcolumn>
<d>0.897219855</d>
<d>0.84355526</d>
<d>0.885964165</d>
<d>0.932265273</d>
<d>1</d>
<d>0.914742564</d>
<d>0.883410588</d>
<d></d>
</Subcolumn>
<Subcolumn>
<d>0.800306819</d>
<d>0.812601403</d>
<d>0.781004874</d>
<d>0.82609125</d>
<d>0.933268962</d>
<d>1</d>
<d>0.92021045</d>
<d>0.852274794</d>
</Subcolumn>
<Subcolumn>
<d>0.84632811</d>
<d>0.906252544</d>
<d>0.930588044</d>
<d>1</d>
<d>0.980071033</d>
<d>0.814190683</d>
<d></d>
<d></d>
</Subcolumn>
<Subcolumn>
<d>0.661299191</d>
<d>0.868492669</d>
<d>0.790660091</d>
<d>0.845948156</d>
<d>1</d>
<d>0.795491656</d>
<d></d>
<d></d>
</Subcolumn>
<Subcolumn>
<d>0.888279959</d>
<d>0.947721382</d>
<d>1</d>
<d>0.969567705</d>
<d>0.911202816</d>
<d></d>
<d></d>
<d></d>
</Subcolumn>
<Subcolumn>
<d>0.787430341</d>
<d>0.846207594</d>
<d>0.939884241</d>
<d>1</d>
<d>0.977790363</d>
<d>0.939792843</d>
<d>0.666263492</d>
<d></d>
</Subcolumn>
<Subcolumn>
<d>0.990896499</d>
<d>0.961128782</d>
<d>1</d>
<d>0.948551202</d>
<d>0.836607891</d>
<d></d>
<d></d>
<d></d>
</Subcolumn>
<Subcolumn>
<d>0.970873786</d>
<d>0.990291262</d>
<d>0.854368932</d>
<d></d>
<d></d>
<d></d>
<d></d>
<d></d>
</Subcolumn>
<Subcolumn>
<d>0.795432302</d>
<d>0.935859894</d>
<d>1</d>
<d>0.918367615</d>
<d>0.97424766</d>
<d>0.879009003</d>
<d></d>
<d></d>
</Subcolumn>
<Subcolumn>
<d>0.771139076</d>
<d>0.776350234</d>
<d>1</d>
<d>0.905104459</d>
<d>0.920410507</d>
<d>0.928527795</d>
<d></d>
<d></d>
</Subcolumn>
<Subcolumn>
<d>0.623654543</d>
<d>0.638318882</d>
<d>0.810145041</d>
<d>1</d>
<d>0.887736885</d>
<d>0.784713776</d>
<d></d>
<d></d>
</Subcolumn>
<Subcolumn>
<d>0.666070285</d>
<d>0.819859198</d>
<d>1</d>
<d>0.711776011</d>
<d></d>
<d></d>
<d></d>
<d></d>
</Subcolumn>
<Subcolumn>
<d>0.712417647</d>
<d>0.897058824</d>
<d>1</d>
<d>0.834966667</d>
<d>0.980392157</d>
<d></d>
<d></d>
<d></d>
</Subcolumn>
<Subcolumn>
<d>0.932446999</d>
<d>1</d>
<d>0.868767708</d>
<d>0.829136679</d>
<d>0.735672648</d>
<d>0.836993194</d>
<d>0.635034357</d>
<d></d>
</Subcolumn>
<Subcolumn>
<d>0.457284079</d>
<d>0.644504421</d>
<d>0.807310779</d>
<d>1</d>
<d>0.84177077</d>
<d></d>
<d></d>
<d></d>
</Subcolumn>
<Subcolumn>
<d>0.796803976</d>
<d>0.838631879</d>
<d>1</d>
<d>0.984651437</d>
<d>0.775599635</d>
<d></d>
<d></d>
<d></d>
</Subcolumn>
<Subcolumn>
<d>1</d>
<d>0.832271133</d>
<d>0.759258187</d>
<d>0.799094413</d>
<d>0.841045662</d>
<d>0.728411632</d>
<d>0.661978754</d>
<d></d>
</Subcolumn>
<Subcolumn>
<d>0.839415723</d>
<d>0.832117184</d>
<d>0.981752011</d>
<d>0.837591088</d>
<d>0.925181765</d>
<d>1</d>
<d>1</d>
<d>0.98540128</d>
</Subcolumn>
</YColumn>
</Table>
<Table ID="Table80" XFormat="none" TableType="OneWay" EVFormat="AsteriskAfterNumber">
<Title>Copy of 5hpf</Title>
<RowTitlesColumn Width="84">
<Subcolumn></Subcolumn>
</RowTitlesColumn>
<YColumn Width="84" Decimals="9" Subcolumns="1">
<Title>Basal</Title>
<Subcolumn>
<d>0.375730064</d>
<d>0.387393004</d>
<d>0.498325218</d>
<d>0.580259421</d>
<d>0.579541359</d>
<d>0.541616279</d>
<d>0.515731261</d>
<d>0.667655786</d>
<d>0.534124629</d>
<d>0.677547478</d>
<d>0.661721068</d>
<d>0.707221068</d>
<d>0.697329377</d>
<d>0.673590504</d>
<d>0.48847409</d>
<d>0.481605313</d>
<d>0.502463157</d>
<d>0.601601571</d>
<d>0.478332537</d>
<d>0.520237378</d>
<d>0.60786859</d>
<d>0.457318182</d>
<d>0.46855158</d>
<d>0.42377909</d>
<d>0.416651163</d>
<d>0.434240244</d>
<d>0.462833024</d>
<d>0.459515388</d>
<d>0.385090188</d>
<d>0.36844549</d>
<d>0.429773853</d>
<d>0.399180088</d>
<d>0.394520497</d>
<d>0.343971358</d>
<d>0.432635813</d>
<d>0.323671599</d>
<d>0.497048307</d>
<d>0.382716618</d>
<d>0.391841047</d>
<d>0.457864063</d>
<d>0.507267547</d>
<d>0.576728444</d>
<d>0.56136951</d>
<d>0.533457583</d>
<d>0.63604305</d>
<d>0.281880708</d>
<d>0.357518698</d>
<d>0.361213898</d>
<d>0.315603037</d>
<d>0.282158318</d>
<d>0.340031844</d>
<d>0.32942715</d>
<d>0.293244003</d>
<d>0.399017978</d>
<d>0.406564698</d>
<d>0.353078717</d>
<d>0.426449229</d>
<d>0.553398058</d>
<d>0.533980583</d>
<d>0.611650485</d>
<d>0.432944733</d>
<d>0.431001729</d>
<d>0.420310618</d>
<d>0.532070709</d>
<d>0.472303345</d>
<d>0.510204376</d>
<d>0.309509265</d>
<d>0.326794543</d>
<d>0.310579515</d>
<d>0.413054775</d>
<d>0.482366931</d>
<d>0.363108125</d>
<d>0.457749702</d>
<d>0.282918743</d>
<d>0.369214371</d>
<d>0.467437648</d>
<d>0.458871189</d>
<d>0.460260787</d>
<d>0.45294837</d>
<d>0.283205969</d>
<d>0.313676453</d>
<d>0.520343853</d>
<d>0.254901961</d>
<d>0.29084902</d>
<d>0.222221569</d>
<d>0.200980392</d>
<d>0.248366667</d>
<d>0.390790374</d>
<d>0.362655095</d>
<d>0.223817045</d>
<d>0.339614746</d>
<d>0.379200182</d>
<d>0.447695965</d>
<d>0.401608754</d>
<d>0.368274712</d>
<d>0.461411387</d>
<d>0.266386252</d>
<d>0.354401277</d>
<d>0.346991064</d>
<d>0.240066554</d>
<d>0.349119556</d>
<d>0.315492695</d>
<d>0.300544859</d>
<d>0.252560171</d>
<d>0.463385128</d>
<d>0.390762748</d>
<d>0.473002024</d>
<d>0.518438591</d>
<d>0.524060445</d>
<d>0.410701549</d>
<d>0.399929499</d>
<d>0.377737157</d>
<d>0.4635032</d>
<d>0.375912523</d>
<d>0.301094288</d>
<d>0.259124405</d>
<d>0.388686608</d>
<d>0.257299771</d>
<d>0.399634416</d>
</Subcolumn>
</YColumn>
<YColumn Width="84" Decimals="9" Subcolumns="1">
<Title>Apical</Title>
<Subcolumn>
<d>0.855079523</d>
<d>0.862112633</d>
<d>0.955473204</d>
<d>0.890040509</d>
<d>0.931604604</d>
<d>1</d>
<d>0.890619412</d>
<d>0.940652819</d>
<d>1</d>
<d>0.919881306</d>
<d>0.897219855</d>
<d>0.84355526</d>
<d>0.885964165</d>
<d>0.932265273</d>
<d>1</d>
<d>0.914742564</d>
<d>0.883410588</d>
<d>0.800306819</d>
<d>0.812601403</d>
<d>0.781004874</d>
<d>0.82609125</d>
<d>0.933268962</d>
<d>1</d>
<d>0.92021045</d>
<d>0.852274794</d>
<d>0.84632811</d>
<d>0.906252544</d>
<d>0.930588044</d>
<d>1</d>
<d>0.980071033</d>
<d>0.814190683</d>
<d>0.661299191</d>
<d>0.868492669</d>
<d>0.790660091</d>
<d>0.845948156</d>
<d>1</d>
<d>0.795491656</d>
<d>0.888279959</d>
<d>0.947721382</d>
<d>1</d>
<d>0.969567705</d>
<d>0.911202816</d>
<d>0.787430341</d>
<d>0.846207594</d>
<d>0.939884241</d>
<d>1</d>
<d>0.977790363</d>
<d>0.939792843</d>
<d>0.666263492</d>
<d>0.990896499</d>
<d>0.961128782</d>
<d>1</d>
<d>0.948551202</d>
<d>0.836607891</d>
<d>0.970873786</d>
<d>0.990291262</d>
<d>0.854368932</d>
<d>0.795432302</d>
<d>0.935859894</d>
<d>1</d>
<d>0.918367615</d>
<d>0.97424766</d>
<d>0.879009003</d>
<d>0.771139076</d>
<d>0.776350234</d>
<d>1</d>
<d>0.905104459</d>
<d>0.920410507</d>
<d>0.928527795</d>
<d>0.623654543</d>
<d>0.638318882</d>
<d>0.810145041</d>
<d>1</d>
<d>0.887736885</d>
<d>0.784713776</d>
<d>0.666070285</d>
<d>0.819859198</d>
<d>1</d>
<d>0.711776011</d>
<d>0.712417647</d>
<d>0.897058824</d>
<d>1</d>
<d>0.834966667</d>
<d>0.980392157</d>
<d>0.932446999</d>
<d>1</d>
<d>0.868767708</d>
<d>0.829136679</d>
<d>0.735672648</d>
<d>0.836993194</d>
<d>0.635034357</d>
<d>0.457284079</d>
<d>0.644504421</d>
<d>0.807310779</d>
<d>1</d>
<d>0.84177077</d>
<d>0.796803976</d>
<d>0.838631879</d>
<d>1</d>
<d>0.984651437</d>
<d>0.775599635</d>
<d>1</d>
<d>0.832271133</d>
<d>0.759258187</d>
<d>0.799094413</d>
<d>0.841045662</d>
<d>0.728411632</d>
<d>0.661978754</d>
<d>0.839415723</d>
<d>0.832117184</d>
<d>0.981752011</d>
<d>0.837591088</d>
<d>0.925181765</d>
<d>1</d>
<d>1</d>
<d>0.98540128</d>
</Subcolumn>
</YColumn>
</Table>
<Table ID="Table24" XFormat="numbers" YFormat="replicates" Replicates="16" TableType="XY" EVFormat="AsteriskAfterNumber">
<Title>6hpf</Title>
<RowTitlesColumn Width="84">
<Subcolumn></Subcolumn>
</RowTitlesColumn>
<SubColumnTitles OwnSet="0">
<Subcolumn>
<d>1</d>
</Subcolumn>
<Subcolumn>
<d>2</d>
</Subcolumn>
<Subcolumn>
<d>3</d>
</Subcolumn>
<Subcolumn>
<d>4</d>
</Subcolumn>
<Subcolumn>
<d>5</d>
</Subcolumn>
<Subcolumn>
<d>6</d>
</Subcolumn>
<Subcolumn>
<d>7</d>
</Subcolumn>
<Subcolumn>
<d>8</d>
</Subcolumn>
<Subcolumn>
<d>9</d>
</Subcolumn>
<Subcolumn>
<d>10</d>
</Subcolumn>
<Subcolumn>
<d>11</d>
</Subcolumn>
<Subcolumn>
<d>12</d>
</Subcolumn>
<Subcolumn>
<d>13</d>
</Subcolumn>
<Subcolumn>
<d>14</d>
</Subcolumn>
<Subcolumn>
<d>15</d>
</Subcolumn>
<Subcolumn>
<d>16</d>
</Subcolumn>
</SubColumnTitles>
<XColumn Width="51" Subcolumns="1" Decimals="15">
<Title></Title>
<Subcolumn></Subcolumn>
</XColumn>
<XAdvancedColumn Version="1" Width="51" Decimals="15" Subcolumns="1">
<Title></Title>
<Subcolumn></Subcolumn>
</XAdvancedColumn>
<YColumn Width="1345" Decimals="9" Subcolumns="16">
<Title>Basal</Title>
<Subcolumn>
<d>0.433618295</d>
<d>0.547770282</d>
<d>0.499197149</d>
<d>0.510138784</d>
<d>0.471219571</d>
<d>0.555832954</d>
<d></d>
<d></d>
<d></d>
<d></d>
<d></d>
<d></d>
<d></d>
</Subcolumn>
<Subcolumn>
<d>0.431052422</d>
<d>0.439199313</d>
<d>0.355725268</d>
<d>0.39734115</d>
<d>0.418639599</d>
<d>0.405043611</d>
<d></d>
<d></d>
<d></d>
<d></d>
<d></d>
<d></d>
<d></d>
</Subcolumn>
<Subcolumn>
<d>0.545004669</d>
<d>0.51124708</d>
<d>0.571688097</d>
<d>0.638689155</d>
<d>0.620349748</d>
<d></d>
<d></d>
<d></d>
<d></d>
<d></d>
<d></d>
<d></d>
<d></d>
</Subcolumn>
<Subcolumn>
<d>0.642083336</d>
<d>0.554226924</d>
<d>0.538551131</d>
<d>0.602705709</d>
<d></d>
<d></d>
<d></d>
<d></d>
<d></d>
<d></d>
<d></d>
<d></d>
<d></d>
</Subcolumn>
<Subcolumn>
<d>0.390977542</d>
<d>0.490227191</d>
<d>0.535339483</d>
<d>0.538848506</d>
<d>0.483710898</d>
<d>0.388472027</d>
<d>0.479198366</d>
<d>0.459147734</d>
<d>0.432079056</d>
<d>0.563408412</d>
<d>0.506267044</d>
<d>0.451129436</d>
<d>0.595488119</d>
</Subcolumn>
<Subcolumn>
<d>0.536104996</d>
<d>0.498142061</d>
<d>0.475558638</d>
<d>0.529782308</d>
<d>0.468157039</d>
<d>0.398781701</d>
<d>0.446518501</d>
<d></d>
<d></d>
<d></d>
<d></d>
<d></d>
<d></d>
</Subcolumn>
<Subcolumn>
<d>0.473103579</d>
<d>0.41302039</d>
<d>0.347434717</d>
<d>0.434939568</d>
<d>0.470756406</d>
<d>0.471986475</d>
<d></d>
<d></d>
<d></d>
<d></d>
<d></d>
<d></d>
<d></d>
</Subcolumn>
<Subcolumn>
<d>0.743514747</d>
<d>0.784233114</d>
<d>0.779913074</d>
<d>0.753622174</d>
<d>0.765465927</d>
<d>0.623054424</d>
<d></d>
<d></d>
<d></d>
<d></d>
<d></d>
<d></d>
<d></d>
</Subcolumn>
<Subcolumn>
<d>0.386858908</d>
<d>0.482258314</d>
<d>0.466958885</d>
<d>0.603446072</d>
<d>0.46950879</d>
<d>0.551795362</d>
<d></d>
<d></d>
<d></d>
<d></d>
<d></d>
<d></d>
<d></d>
</Subcolumn>
<Subcolumn>
<d>0.40485979</d>
<d>0.303955235</d>
<d>0.245909383</d>
<d>0.17736662</d>
<d>0.146783757</d>
<d>0.178155483</d>
<d></d>
<d></d>
<d></d>
<d></d>
<d></d>
<d></d>
<d></d>
</Subcolumn>
<Subcolumn>
<d>0.491237774</d>
<d>0.626095278</d>
<d>0.603369163</d>
<d>0.513199741</d>
<d></d>
<d></d>
<d></d>
<d></d>
<d></d>
<d></d>
<d></d>
<d></d>
<d></d>
</Subcolumn>
<Subcolumn>
<d>0.238392781</d>
<d>0.388117249</d>
<d>0.363586632</d>
<d>0.385832442</d>
<d></d>
<d></d>
<d></d>
<d></d>
<d></d>
<d></d>
<d></d>
<d></d>
<d></d>
</Subcolumn>
<Subcolumn>
<d>0.386571719</d>
<d>0.329603255</d>
<d>0.496439471</d>
<d>0.475076297</d>
<d>0.394710071</d>
<d></d>
<d></d>
<d></d>
<d></d>
<d></d>
<d></d>
<d></d>
<d></d>
</Subcolumn>
<Subcolumn>
<d>0.413094423</d>
<d>0.364575925</d>
<d>0.423846043</d>
<d>0.408132824</d>
<d></d>
<d></d>
<d></d>
<d></d>
<d></d>
<d></d>
<d></d>
<d></d>
<d></d>
</Subcolumn>
<Subcolumn>
<d>0.347953522</d>
<d>0.242689394</d>
<d>0.384990104</d>
<d>0.239766585</d>
<d>0.305069273</d>
<d></d>
<d></d>
<d></d>
<d></d>
<d></d>
<d></d>
<d></d>
<d></d>
</Subcolumn>
<Subcolumn>
<d>0.586492573</d>
<d>0.630097458</d>
<d>0.552385517</d>
<d>0.534113759</d>
<d>0.450692732</d>
<d></d>
<d></d>
<d></d>
<d></d>
<d></d>
<d></d>
<d></d>
<d></d>
</Subcolumn>
</YColumn>
<YColumn Width="1345" Decimals="9" Subcolumns="16">
<Title>Apical</Title>
<Subcolumn>
<d>0.960853466</d>
<d>0.882997958</d>
<d>1</d>
<d>0.930102045</d>
<d>0.873935336</d>
<d>0.893516487</d>
<d></d>
</Subcolumn>
<Subcolumn>
<d>1</d>
<d>0.9268727</d>
<d>0.859375836</d>
<d>0.947184187</d>
<d>0.708346959</d>
<d>0.698602201</d>
<d></d>
</Subcolumn>
<Subcolumn>
<d>0.788659906</d>
<d>0.902158945</d>
<d>0.951679886</d>
<d>1</d>
<d>0.690339247</d>
<d></d>
<d></d>
</Subcolumn>
<Subcolumn>
<d>0.997973704</d>
<d>0.925049463</d>
<d>0.881163813</d>
<d>0.761540701</d>
<d></d>
<d></d>
<d></d>
</Subcolumn>
<Subcolumn>
<d>0.76591523</d>
<d>0.696741528</d>
<d>0.783958843</d>
<d>1</d>
<d>0.923808252</d>
<d>0.812532785</d>
<d>0.814536545</d>
</Subcolumn>
<Subcolumn>
<d>0.666780589</d>
<d>0.939262655</d>
<d>0.962857976</d>
<d>0.91350281</d>
<d>1</d>
<d>0.795955088</d>
<d>0.971690306</d>
</Subcolumn>
<Subcolumn>
<d>0.786819527</d>
<d>0.713063645</d>
<d>0.816530432</d>
<d>0.848324924</d>
<d>1</d>
<d>0.714482956</d>
<d></d>
</Subcolumn>
<Subcolumn>
<d>0.934663642</d>
<d>0.997437061</d>
<d>1</d>
<d>0.990760736</d>
<d>0.765382828</d>
<d></d>
<d></d>
</Subcolumn>
<Subcolumn>
<d>0.865674177</d>
<d>0.89173333</d>
<d>0.971073046</d>
<d>0.96300115</d>
<d>1</d>
<d>0.6727981</d>
<d></d>
</Subcolumn>
<Subcolumn>
<d>0.81795909</d>
<d>0.907716505</d>
<d>1</d>
<d>0.888847585</d>
<d>0.934650723</d>
<d>0.944672843</d>
<d></d>
</Subcolumn>
<Subcolumn>
<d>0.900333314</d>
<d>1</d>
<d>0.983516244</d>
<d>0.782341639</d>
<d></d>
<d></d>
<d></d>
</Subcolumn>
<Subcolumn>
<d>0.965729156</d>
<d>0.994858244</d>
<d>0.849938018</d>
<d>0.727725331</d>
<d></d>
<d></d>
<d></d>
</Subcolumn>
<Subcolumn>
<d>0.91353001</d>
<d>1</d>
<d>0.905391658</d>
<d>1</d>
<d>0.803662258</d>
<d></d>
<d></d>
</Subcolumn>
<Subcolumn>
<d>0.800138219</d>
<d>0.832805056</d>
<d>1</d>
<d>0.748035848</d>
<d></d>
<d></d>
<d></d>
</Subcolumn>
<Subcolumn>
<d>0.961014878</d>
<d>1</d>
<d>0.930800232</d>
<d>0.887915984</d>
<d>0.593567772</d>
<d></d>
<d></d>
</Subcolumn>
<Subcolumn>
<d>0.85709522</d>
<d>1</d>
<d>0.892862888</d>
<d>0.864590595</d>
<d>0.737304949</d>
<d></d>
<d></d>
</Subcolumn>
</YColumn>
</Table>
<Table ID="Table84" XFormat="none" TableType="OneWay" EVFormat="AsteriskAfterNumber">
<Title>Copy of 6hpf</Title>
<RowTitlesColumn Width="84">
<Subcolumn></Subcolumn>
</RowTitlesColumn>
<YColumn Width="84" Decimals="9" Subcolumns="1">
<Title>Basal</Title>
<Subcolumn>
<d>0.433618295</d>
<d>0.547770282</d>
<d>0.499197149</d>
<d>0.510138784</d>
<d>0.471219571</d>
<d>0.555832954</d>
<d>0.431052422</d>
<d>0.439199313</d>
<d>0.355725268</d>
<d>0.39734115</d>
<d>0.418639599</d>
<d>0.405043611</d>
<d>0.545004669</d>
<d>0.51124708</d>
<d>0.571688097</d>
<d>0.638689155</d>
<d>0.620349748</d>
<d>0.642083336</d>
<d>0.554226924</d>
<d>0.538551131</d>
<d>0.602705709</d>
<d>0.390977542</d>
<d>0.490227191</d>
<d>0.535339483</d>
<d>0.538848506</d>
<d>0.483710898</d>
<d>0.388472027</d>
<d>0.479198366</d>
<d>0.459147734</d>
<d>0.432079056</d>
<d>0.563408412</d>
<d>0.506267044</d>
<d>0.451129436</d>
<d>0.595488119</d>
<d>0.536104996</d>
<d>0.498142061</d>
<d>0.475558638</d>
<d>0.529782308</d>
<d>0.468157039</d>
<d>0.398781701</d>
<d>0.446518501</d>
<d>0.473103579</d>
<d>0.41302039</d>
<d>0.347434717</d>
<d>0.434939568</d>
<d>0.470756406</d>
<d>0.471986475</d>
<d>0.743514747</d>
<d>0.784233114</d>
<d>0.779913074</d>
<d>0.753622174</d>
<d>0.765465927</d>
<d>0.623054424</d>
<d>0.386858908</d>
<d>0.482258314</d>
<d>0.466958885</d>
<d>0.603446072</d>
<d>0.46950879</d>
<d>0.551795362</d>
<d>0.40485979</d>
<d>0.303955235</d>
<d>0.245909383</d>
<d>0.17736662</d>
<d>0.146783757</d>
<d>0.178155483</d>
<d>0.491237774</d>
<d>0.626095278</d>
<d>0.603369163</d>
<d>0.513199741</d>
<d>0.238392781</d>
<d>0.388117249</d>
<d>0.363586632</d>
<d>0.385832442</d>
<d>0.386571719</d>
<d>0.329603255</d>
<d>0.496439471</d>
<d>0.475076297</d>
<d>0.394710071</d>
<d>0.413094423</d>
<d>0.364575925</d>
<d>0.423846043</d>
<d>0.408132824</d>
<d>0.347953522</d>
<d>0.242689394</d>
<d>0.384990104</d>
<d>0.239766585</d>
<d>0.305069273</d>
<d>0.586492573</d>
<d>0.630097458</d>
<d>0.552385517</d>
<d>0.534113759</d>
<d>0.450692732</d>
</Subcolumn>
</YColumn>
<YColumn Width="84" Decimals="9" Subcolumns="1">
<Title>Apical</Title>
<Subcolumn>
<d>0.960853466</d>
<d>0.882997958</d>
<d>1</d>
<d>0.930102045</d>
<d>0.873935336</d>
<d>0.893516487</d>
<d>1</d>
<d>0.9268727</d>
<d>0.859375836</d>
<d>0.947184187</d>
<d>0.708346959</d>
<d>0.698602201</d>
<d>0.788659906</d>
<d>0.902158945</d>
<d>0.951679886</d>
<d>1</d>
<d>0.690339247</d>
<d>0.997973704</d>
<d>0.925049463</d>
<d>0.881163813</d>
<d>0.761540701</d>
<d>0.76591523</d>
<d>0.696741528</d>
<d>0.783958843</d>
<d>1</d>
<d>0.923808252</d>
<d>0.812532785</d>
<d>0.814536545</d>
<d>0.666780589</d>
<d>0.939262655</d>
<d>0.962857976</d>
<d>0.91350281</d>
<d>1</d>
<d>0.795955088</d>
<d>0.971690306</d>
<d>0.786819527</d>
<d>0.713063645</d>
<d>0.816530432</d>
<d>0.848324924</d>
<d>1</d>
<d>0.714482956</d>
<d>0.934663642</d>
<d>0.997437061</d>
<d>1</d>
<d>0.990760736</d>
<d>0.765382828</d>
<d>0.865674177</d>
<d>0.89173333</d>
<d>0.971073046</d>
<d>0.96300115</d>
<d>1</d>
<d>0.6727981</d>
<d>0.81795909</d>
<d>0.907716505</d>
<d>1</d>
<d>0.888847585</d>
<d>0.934650723</d>
<d>0.944672843</d>
<d>0.900333314</d>
<d>1</d>
<d>0.983516244</d>
<d>0.782341639</d>
<d>0.965729156</d>
<d>0.994858244</d>
<d>0.849938018</d>
<d>0.727725331</d>
<d>0.91353001</d>
<d>1</d>
<d>0.905391658</d>
<d>1</d>
<d>0.803662258</d>
<d>0.800138219</d>
<d>0.832805056</d>
<d>1</d>
<d>0.748035848</d>
<d>0.961014878</d>
<d>1</d>
<d>0.930800232</d>
<d>0.887915984</d>
<d>0.593567772</d>
<d>0.85709522</d>
<d>1</d>
<d>0.892862888</d>
<d>0.864590595</d>
<d>0.737304949</d>
</Subcolumn>
</YColumn>
</Table>
<Table ID="Table25" XFormat="numbers" YFormat="replicates" Replicates="18" TableType="XY" EVFormat="AsteriskAfterNumber">
<Title>7hpf</Title>
<RowTitlesColumn Width="84">
<Subcolumn></Subcolumn>
</RowTitlesColumn>
<SubColumnTitles OwnSet="0">
<Subcolumn>
<d>1</d>
</Subcolumn>
<Subcolumn>
<d>2</d>
</Subcolumn>
<Subcolumn>
<d>3</d>
</Subcolumn>
<Subcolumn>
<d>4</d>
</Subcolumn>
<Subcolumn>
<d>5</d>
</Subcolumn>
<Subcolumn>
<d>6</d>
</Subcolumn>
<Subcolumn>
<d>7</d>
</Subcolumn>
<Subcolumn>
<d>8</d>
</Subcolumn>
<Subcolumn>
<d>9</d>
</Subcolumn>
<Subcolumn>
<d>10</d>
</Subcolumn>
<Subcolumn>
<d>11</d>
</Subcolumn>
<Subcolumn>
<d>12</d>
</Subcolumn>
<Subcolumn>
<d>13</d>
</Subcolumn>
<Subcolumn>
<d>14</d>
</Subcolumn>
<Subcolumn>
<d>15</d>
</Subcolumn>
<Subcolumn>
<d>16</d>
</Subcolumn>
<Subcolumn>
<d>17</d>
</Subcolumn>
<Subcolumn>
<d>18</d>
</Subcolumn>
</SubColumnTitles>
<XColumn Width="51" Subcolumns="1" Decimals="9">
<Title></Title>
<Subcolumn></Subcolumn>
</XColumn>
<XAdvancedColumn Version="1" Width="51" Decimals="9" Subcolumns="1">
<Title></Title>
<Subcolumn></Subcolumn>
</XAdvancedColumn>
<YColumn Width="1513" Decimals="9" Subcolumns="18">
<Title>Basal</Title>
<Subcolumn>
<d>0.386046256</d>
<d>0.370582056</d>
<d>0.45108286</d>
<d>0.337424746</d>
<d></d>
<d></d>
<d></d>
<d></d>
</Subcolumn>
<Subcolumn>
<d>0.050820583</d>
<d>0.022078155</d>
<d>0.028290125</d>
<d>0.084501077</d>
<d>0.126074008</d>
<d></d>
<d></d>
<d></d>
</Subcolumn>
<Subcolumn>
<d>0.423244593</d>
<d>0.390904003</d>
<d>0.308010766</d>
<d>0.238846329</d>
<d></d>
<d></d>
<d></d>
<d></d>
</Subcolumn>
<Subcolumn>
<d>0.327102574</d>
<d>0.158878627</d>
<d>0.257009399</d>
<d>0.268691868</d>
<d>0.441588476</d>
<d></d>
<d></d>
<d></d>
</Subcolumn>
<Subcolumn>
<d>0.323529412</d>
<d>0.411764706</d>
<d>0.323529412</d>
<d></d>
<d></d>
<d></d>
<d></d>
<d></d>
</Subcolumn>
<Subcolumn>
<d>0.442360435</d>
<d>0.562066572</d>
<d>0.487151131</d>
<d>0.435241835</d>
<d>0.507639224</d>
<d>0.498696738</d>
<d></d>
<d></d>
</Subcolumn>
<Subcolumn>
<d>0.386679251</d>
<d>0.246993129</d>
<d>0.302497421</d>
<d>0.186864506</d>
<d>0.292322483</d>
<d>0.327475143</d>
<d>0.301572906</d>
<d>0.268271034</d>
</Subcolumn>
<Subcolumn>
<d>0.366083298</d>
<d>0.316822214</d>
<d>0.368677913</d>
<d>0.287309036</d>
<d>0.392368078</d>
<d>0.311806873</d>
<d></d>
<d></d>
</Subcolumn>
<Subcolumn>
<d>0.396226415</d>
<d>0.249916981</d>
<d>0.264813208</d>
<d>0.34955283</d>
<d>0.385964151</d>
<d>0.376366038</d>
<d></d>
<d></d>
</Subcolumn>
<Subcolumn>
<d>0.284596229</d>
<d>0.462041978</d>
<d>0.435432231</d>
<d>0.352258983</d>
<d></d>
<d></d>
<d></d>
<d></d>
</Subcolumn>
<Subcolumn>
<d>0.424008791</d>
<d>0.391554452</d>
<d>0.381917085</d>
<d>0.468224075</d>
<d>0.503630575</d>
<d></d>
<d></d>
<d></d>
</Subcolumn>
<Subcolumn>
<d>0.269366245</d>
<d>0.285211318</d>
<d>0.438380887</d>
<d>0.380281757</d>
<d></d>
<d></d>
<d></d>
<d></d>
</Subcolumn>
<Subcolumn>
<d>0.5</d>
<d>0.41245</d>
<d>0.352382143</d>
<d>0.350219643</d>
<d>0.412119643</d>
<d>0.309133929</d>
<d></d>
<d></d>
</Subcolumn>
<Subcolumn>
<d>0.318209782</d>
<d>0.328834958</d>
<d>0.349101891</d>
<d>0.260863833</d>
<d></d>
<d></d>
<d></d>
<d></d>
</Subcolumn>
<Subcolumn>
<d>0.588007416</d>
<d>0.709887518</d>
<d>0.699140817</d>
<d>0.569077036</d>
<d>0.670079416</d>
<d>0.584323722</d>
<d></d>
<d></d>
</Subcolumn>
<Subcolumn>
<d>0.194450386</d>
<d>0.250938223</d>
<d>0.37554203</d>
<d>0.299625359</d>
<d>0.33548201</d>
<d>0.386363194</d>
<d></d>
<d></d>
</Subcolumn>
<Subcolumn>
<d>0.214285714</d>
<d>0.125</d>
<d>0.178571429</d>
<d>0.214285714</d>
<d>0.196428571</d>
<d></d>
<d></d>
<d></d>
</Subcolumn>
<Subcolumn>
<d>0.530638029</d>
<d>0.561276058</d>
<d>0.597599495</d>
<d>0.533796589</d>
<d></d>
<d></d>
<d></d>
<d></d>
</Subcolumn>
</YColumn>
<YColumn Width="1513" Decimals="9" Subcolumns="18">
<Title>Apical</Title>
<Subcolumn>
<d>1</d>
<d>0.93618249</d>
<d>0.966769545</d>
<d>0.926401297</d>
<d>0.842249309</d>
<d>0.711137841</d>
<d></d>
<d></d>
</Subcolumn>
<Subcolumn>
<d>0.739800309</d>
<d>0.83003903</d>
<d>1</d>
<d>0.784347938</d>
<d>0.762308745</d>
<d></d>
<d></d>
<d></d>
</Subcolumn>
<Subcolumn>
<d>1</d>
<d>0.879665292</d>
<d>0.680857901</d>
<d>0.862164912</d>
<d></d>
<d></d>
<d></d>
<d></d>
</Subcolumn>
<Subcolumn>
<d>1</d>
<d>0.911214548</d>
<d>0.757008582</d>
<d>0.810746628</d>
<d>0.775700858</d>
<d>0.425233347</d>
<d></d>
<d></d>
</Subcolumn>
<Subcolumn>
<d>1</d>
<d>0.882352941</d>
<d>0.970588235</d>
<d>0.852941176</d>
<d></d>
<d></d>
<d></d>
<d></d>
</Subcolumn>
<Subcolumn>
<d>0.882464832</d>
<d>1</d>
<d>0.96432193</d>
<d>1</d>
<d>0.776822355</d>
<d>0.476388161</d>
<d></d>
<d></d>
</Subcolumn>
<Subcolumn>
<d>0.975948551</d>
<d>0.892692992</d>
<d>0.851065213</d>
<d>0.928770167</d>
<d>0.898243597</d>
<d>1</d>
<d>0.623497444</d>
<d>0.790934832</d>
</Subcolumn>
<Subcolumn>
<d>0.79991031</d>
<d>0.812823898</d>
<d>1</d>
<d>0.885537193</d>
<d>0.73998705</d>
<d>0.93808845</d>
<d></d>
<d></d>
</Subcolumn>
<Subcolumn>
<d>0.687850943</d>
<d>0.72095283</d>
<d>0.937437736</d>
<d>0.828864151</d>
<d>0.905990566</d>
<d>1</d>
<d></d>
<d></d>
</Subcolumn>
<Subcolumn>
<d>0.694201352</d>
<d>0.790323728</d>
<d>1</d>
<d>0.796869441</d>
<d></d>
<d></d>
<d></d>
<d></d>
</Subcolumn>
<Subcolumn>
<d>0.940387897</d>
<d>0.991770696</d>
<d>0.985276295</d>
<d>0.954913732</d>
<d>0.65368022</d>
<d></d>
<d></d>
<d></d>
</Subcolumn>
<Subcolumn>
<d>0.639084091</d>
<d>1</d>
<d>0.797534824</d>
<d>0.649648002</d>
<d></d>
<d></d>
<d></d>
<d></d>
</Subcolumn>
<Subcolumn>
<d>0.799439286</d>
<d>0.793578571</d>
<d>0.92545</d>
<d>0.874516071</d>
<d>0.931292857</d>
<d>1</d>
<d></d>
<d></d>
</Subcolumn>
<Subcolumn>
<d>0.979411827</d>
<d>1</d>
<d>0.908638941</d>
<d>0.848559419</d>
<d></d>
<d></d>
<d></d>
<d></d>
</Subcolumn>
<Subcolumn>
<d>0.501843576</d>
<d>0.977078087</d>
<d>0.88006724</d>
<d>1</d>
<d>0.724110379</d>
<d>0.899305459</d>
<d></d>
<d></d>
</Subcolumn>
<Subcolumn>
<d>0.513112438</d>
<d>0.706522514</d>
<d>0.845304995</d>
<d>0.78152851</d>
<d>1</d>
<d>0.875026737</d>
<d></d>
<d></d>
</Subcolumn>
<Subcolumn>
<d>0.535714286</d>
<d>0.517857143</d>
<d>0.892857143</d>
<d>1</d>
<d>0.946428571</d>
<d></d>
<d></d>
<d></d>
</Subcolumn>
<Subcolumn>
<d>1</d>
<d>0.861655085</d>
<d>0.837650032</d>
<d>0.808591282</d>
<d></d>
<d></d>
<d></d>
<d></d>
</Subcolumn>
</YColumn>
</Table>
<Table ID="Table88" XFormat="none" TableType="OneWay" EVFormat="AsteriskAfterNumber">
<Title>Copy of 7hpf</Title>
<RowTitlesColumn Width="84">
<Subcolumn></Subcolumn>
</RowTitlesColumn>
<YColumn Width="84" Decimals="9" Subcolumns="1">
<Title>Basal</Title>
<Subcolumn>
<d>0.386046256</d>
<d>0.370582056</d>
<d>0.45108286</d>
<d>0.337424746</d>
<d>0.050820583</d>
<d>0.022078155</d>
<d>0.028290125</d>
<d>0.084501077</d>
<d>0.126074008</d>
<d>0.423244593</d>
<d>0.390904003</d>
<d>0.308010766</d>
<d>0.238846329</d>
<d>0.327102574</d>
<d>0.158878627</d>
<d>0.257009399</d>
<d>0.268691868</d>
<d>0.441588476</d>
<d>0.323529412</d>
<d>0.411764706</d>
<d>0.323529412</d>
<d>0.442360435</d>
<d>0.562066572</d>
<d>0.487151131</d>
<d>0.435241835</d>
<d>0.507639224</d>
<d>0.498696738</d>
<d>0.386679251</d>
<d>0.246993129</d>
<d>0.302497421</d>
<d>0.186864506</d>
<d>0.292322483</d>
<d>0.327475143</d>
<d>0.301572906</d>
<d>0.268271034</d>
<d>0.366083298</d>
<d>0.316822214</d>
<d>0.368677913</d>
<d>0.287309036</d>
<d>0.392368078</d>
<d>0.311806873</d>
<d>0.396226415</d>
<d>0.249916981</d>
<d>0.264813208</d>
<d>0.34955283</d>
<d>0.385964151</d>
<d>0.376366038</d>
<d>0.284596229</d>
<d>0.462041978</d>
<d>0.435432231</d>
<d>0.352258983</d>
<d>0.424008791</d>
<d>0.391554452</d>
<d>0.381917085</d>
<d>0.468224075</d>
<d>0.503630575</d>
<d>0.269366245</d>
<d>0.285211318</d>
<d>0.438380887</d>
<d>0.380281757</d>
<d>0.5</d>
<d>0.41245</d>
<d>0.352382143</d>
<d>0.350219643</d>
<d>0.412119643</d>
<d>0.309133929</d>
<d>0.318209782</d>
<d>0.328834958</d>
<d>0.349101891</d>
<d>0.260863833</d>
<d>0.588007416</d>
<d>0.709887518</d>
<d>0.699140817</d>
<d>0.569077036</d>
<d>0.670079416</d>
<d>0.584323722</d>
<d>0.194450386</d>
<d>0.250938223</d>
<d>0.37554203</d>
<d>0.299625359</d>
<d>0.33548201</d>
<d>0.386363194</d>
<d>0.214285714</d>
<d>0.125</d>
<d>0.178571429</d>
<d>0.214285714</d>
<d>0.196428571</d>
<d>0.530638029</d>
<d>0.561276058</d>
<d>0.597599495</d>
<d>0.533796589</d>
</Subcolumn>
</YColumn>
<YColumn Width="84" Decimals="9" Subcolumns="1">
<Title>Apical</Title>
<Subcolumn>
<d>1</d>
<d>0.93618249</d>
<d>0.966769545</d>
<d>0.926401297</d>
<d>0.842249309</d>
<d>0.711137841</d>
<d>0.739800309</d>
<d>0.83003903</d>
<d>1</d>
<d>0.784347938</d>
<d>0.762308745</d>
<d>1</d>
<d>0.879665292</d>
<d>0.680857901</d>
<d>0.862164912</d>
<d>1</d>
<d>0.911214548</d>
<d>0.757008582</d>
<d>0.810746628</d>
<d>0.775700858</d>
<d>0.425233347</d>
<d>1</d>
<d>0.882352941</d>
<d>0.970588235</d>
<d>0.852941176</d>
<d>0.882464832</d>
<d>1</d>
<d>0.96432193</d>
<d>1</d>
<d>0.776822355</d>
<d>0.476388161</d>
<d>0.975948551</d>
<d>0.892692992</d>
<d>0.851065213</d>
<d>0.928770167</d>
<d>0.898243597</d>
<d>1</d>
<d>0.623497444</d>
<d>0.790934832</d>
<d>0.79991031</d>
<d>0.812823898</d>
<d>1</d>
<d>0.885537193</d>
<d>0.73998705</d>
<d>0.93808845</d>
<d>0.687850943</d>
<d>0.72095283</d>
<d>0.937437736</d>
<d>0.828864151</d>
<d>0.905990566</d>
<d>1</d>
<d>0.694201352</d>
<d>0.790323728</d>
<d>1</d>
<d>0.796869441</d>
<d>0.940387897</d>
<d>0.991770696</d>
<d>0.985276295</d>
<d>0.954913732</d>
<d>0.65368022</d>
<d>0.639084091</d>
<d>1</d>
<d>0.797534824</d>
<d>0.649648002</d>
<d>0.799439286</d>
<d>0.793578571</d>
<d>0.92545</d>
<d>0.874516071</d>
<d>0.931292857</d>
<d>1</d>
<d>0.979411827</d>
<d>1</d>
<d>0.908638941</d>
<d>0.848559419</d>
<d>0.501843576</d>
<d>0.977078087</d>
<d>0.88006724</d>
<d>1</d>
<d>0.724110379</d>
<d>0.899305459</d>
<d>0.513112438</d>
<d>0.706522514</d>
<d>0.845304995</d>
<d>0.78152851</d>
<d>1</d>
<d>0.875026737</d>
<d>0.535714286</d>
<d>0.517857143</d>
<d>0.892857143</d>
<d>1</d>
<d>0.946428571</d>
<d>1</d>
<d>0.861655085</d>
<d>0.837650032</d>
<d>0.808591282</d>
</Subcolumn>
</YColumn>
</Table>
<Table ID="Table26" XFormat="numbers" YFormat="replicates" Replicates="10" TableType="XY" EVFormat="AsteriskAfterNumber">
<Title>8hpf</Title>
<RowTitlesColumn Width="84">
<Subcolumn></Subcolumn>
</RowTitlesColumn>
<SubColumnTitles OwnSet="0">
<Subcolumn>
<d>1</d>
</Subcolumn>
<Subcolumn>
<d>2</d>
</Subcolumn>
<Subcolumn>
<d>3</d>
</Subcolumn>
<Subcolumn>
<d>4</d>
</Subcolumn>
<Subcolumn>
<d>5</d>
</Subcolumn>
<Subcolumn>
<d>6</d>
</Subcolumn>
<Subcolumn>
<d>7</d>
</Subcolumn>
<Subcolumn>
<d>8</d>
</Subcolumn>
<Subcolumn>
<d>9</d>
</Subcolumn>
<Subcolumn>
<d>10</d>
</Subcolumn>
</SubColumnTitles>
<XColumn Width="51" Subcolumns="1" Decimals="15">
<Title></Title>
<Subcolumn></Subcolumn>
</XColumn>
<XAdvancedColumn Version="1" Width="51" Decimals="15" Subcolumns="1">
<Title></Title>
<Subcolumn></Subcolumn>
</XAdvancedColumn>
<YColumn Width="840" Decimals="9" Subcolumns="10">
<Title>Basal</Title>
<Subcolumn>
<d>0.306122449</d>
<d>0.265306122</d>
<d>0.437640816</d>
<d>0.340136735</d>
<d>0.417232653</d>
<d>0.308389796</d>
<d></d>
</Subcolumn>
<Subcolumn>
<d>0.455302477</d>
<d>0.502807299</d>
<d>0.594215262</d>
<d>0.495647069</d>
<d>0.441073076</d>
<d>0.475709613</d>
<d>0.455676304</d>
</Subcolumn>
<Subcolumn>
<d>0.516921001</d>
<d>0.298807545</d>
<d>0.278903366</d>
<d>0.392666795</d>
<d>0.297264944</d>
<d></d>
<d></d>
</Subcolumn>
<Subcolumn>
<d>0.32967033</d>
<d>0.267342857</d>
<d>0.321428571</d>
<d>0.419815385</d>
<d>0.450549451</d>
<d>0.444369231</d>
<d>0.410026374</d>
</Subcolumn>
<Subcolumn>
<d>0.531323161</d>
<d>0.271300247</d>
<d>0.382851545</d>
<d>0.495349262</d>
<d></d>
<d></d>
<d></d>
</Subcolumn>
<Subcolumn>
<d>0.3864216</d>
<d>0.318645524</d>
<d>0.486841208</d>
<d>0.566291762</d>
<d></d>
<d></d>
<d></d>
</Subcolumn>
<Subcolumn>
<d>0.492400617</d>
<d>0.492400617</d>
<d></d>
<d></d>
<d></d>
<d></d>
<d></d>
</Subcolumn>
<Subcolumn>
<d>0.560826244</d>
<d>0.511502056</d>
<d>0.552108258</d>
<d></d>
<d></d>
<d></d>
<d></d>
</Subcolumn>
<Subcolumn>
<d>0.278354948</d>
<d>0.396343914</d>
<d></d>
<d></d>
<d></d>
<d></d>
<d></d>
</Subcolumn>
<Subcolumn>
<d>0.469915725</d>
<d>0.558739895</d>
<d>0.435531731</d>
<d></d>
<d></d>
<d></d>
<d></d>
</Subcolumn>
</YColumn>
<YColumn Width="840" Decimals="9" Subcolumns="10">
<Title>Apical</Title>
<Subcolumn>
<d>0.517006122</d>
<d>0.70975102</d>
<d>0.632653061</d>
<d>0.637187755</d>
<d>1</d>
<d>0.632653061</d>
<d></d>
</Subcolumn>
<Subcolumn>
<d>0.574181953</d>
<d>0.683797223</d>
<d>0.801272451</d>
<d>0.991902805</d>
<d>0.996724218</d>
<d>1</d>
<d>0.8147518</d>
</Subcolumn>
<Subcolumn>
<d>1</d>
<d>0.962509624</d>
<d>0.761315809</d>
<d>0.990641009</d>
<d>0.761778317</d>
<d></d>
<d></d>
</Subcolumn>
<Subcolumn>
<d>0.707417582</d>
<d>0.845468132</d>
<d>0.662087912</d>
<d>0.788118681</d>
<d>1</d>
<d>0.939046154</d>
<d>0.527472527</d>
</Subcolumn>
<Subcolumn>
<d>0.969744467</d>
<d>0.907669318</d>
<d>1</d>
<d>0.807368788</d>
<d>0.697361648</d>
<d></d>
<d></d>
</Subcolumn>
<Subcolumn>
<d>0.944343924</d>
<d>1</d>
<d>0.880752567</d>
<d>0.899414458</d>
<d>0.704651152</d>
<d></d>
<d></d>
</Subcolumn>
<Subcolumn>
<d>1</d>
<d>0.574467387</d>
<d></d>
<d></d>
<d></d>
<d></d>
<d></d>
</Subcolumn>
<Subcolumn>
<d>0.980350189</d>
<d>1</d>
<d>0.748948187</d>
<d></d>
<d></d>
<d></d>
<d></d>
</Subcolumn>
<Subcolumn>
<d>0.823847565</d>
<d>1</d>
<d>0.862068579</d>
<d>0.660572567</d>
<d></d>
<d></d>
<d></d>
</Subcolumn>
<Subcolumn>
<d>0.653295878</d>
<d>1</d>
<d>0.664756063</d>
<d></d>
<d></d>
<d></d>
<d></d>
</Subcolumn>
</YColumn>
</Table>
<Table ID="Table52" XFormat="none" TableType="OneWay" EVFormat="AsteriskAfterNumber">
<Title>Copy of 8hpf</Title>
<RowTitlesColumn Width="84">
<Subcolumn></Subcolumn>
</RowTitlesColumn>
<YColumn Width="84" Decimals="9" Subcolumns="1">
<Title>Basal</Title>
<Subcolumn>
<d>0.306122449</d>
<d>0.265306122</d>
<d>0.437640816</d>
<d>0.340136735</d>
<d>0.417232653</d>
<d>0.308389796</d>
<d>0.455302477</d>
<d>0.502807299</d>
<d>0.594215262</d>
<d>0.495647069</d>
<d>0.441073076</d>
<d>0.475709613</d>
<d>0.455676304</d>
<d>0.516921001</d>
<d>0.298807545</d>
<d>0.278903366</d>
<d>0.392666795</d>
<d>0.297264944</d>
<d>0.32967033</d>
<d>0.267342857</d>
<d>0.321428571</d>
<d>0.419815385</d>
<d>0.450549451</d>
<d>0.444369231</d>
<d>0.410026374</d>
<d>0.531323161</d>
<d>0.271300247</d>
<d>0.382851545</d>
<d>0.495349262</d>
<d>0.3864216</d>
<d>0.318645524</d>
<d>0.486841208</d>
<d>0.566291762</d>
<d>0.492400617</d>
<d>0.492400617</d>
<d>0.560826244</d>
<d>0.511502056</d>
<d>0.552108258</d>
<d>0.278354948</d>
<d>0.396343914</d>
<d>0.469915725</d>
<d>0.558739895</d>
<d>0.435531731</d>
</Subcolumn>
</YColumn>
<YColumn Width="84" Decimals="9" Subcolumns="1">
<Title>Apical</Title>
<Subcolumn>
<d>0.517006122</d>
<d>0.70975102</d>
<d>0.632653061</d>
<d>0.637187755</d>
<d>1</d>
<d>0.632653061</d>
<d>0.574181953</d>
<d>0.683797223</d>
<d>0.801272451</d>
<d>0.991902805</d>
<d>0.996724218</d>
<d>1</d>
<d>0.8147518</d>
<d>1</d>
<d>0.962509624</d>
<d>0.761315809</d>
<d>0.990641009</d>
<d>0.761778317</d>
<d>0.707417582</d>
<d>0.845468132</d>
<d>0.662087912</d>
<d>0.788118681</d>
<d>1</d>
<d>0.939046154</d>
<d>0.527472527</d>
<d>0.969744467</d>
<d>0.907669318</d>
<d>1</d>
<d>0.807368788</d>
<d>0.697361648</d>
<d>0.944343924</d>
<d>1</d>
<d>0.880752567</d>
<d>0.899414458</d>
<d>0.704651152</d>
<d>1</d>
<d>0.574467387</d>
<d>0.980350189</d>
<d>1</d>
<d>0.748948187</d>
<d>0.823847565</d>
<d>1</d>
<d>0.862068579</d>
<d>0.660572567</d>
<d>0.653295878</d>
<d>1</d>
<d>0.664756063</d>
</Subcolumn>
</YColumn>
</Table>
<Table ID="Table27" XFormat="numbers" YFormat="replicates" Replicates="11" TableType="XY" EVFormat="AsteriskAfterNumber">
<Title>9hpf</Title>
<RowTitlesColumn Width="84">
<Subcolumn></Subcolumn>
</RowTitlesColumn>
<SubColumnTitles OwnSet="0">
<Subcolumn>
<d>1</d>
</Subcolumn>
<Subcolumn>
<d>2</d>
</Subcolumn>
<Subcolumn>
<d>3</d>
</Subcolumn>
<Subcolumn>
<d>4</d>
</Subcolumn>
<Subcolumn>
<d>5</d>
</Subcolumn>
<Subcolumn>
<d>6</d>
</Subcolumn>
<Subcolumn>
<d>7</d>
</Subcolumn>
<Subcolumn>
<d>8</d>
</Subcolumn>
<Subcolumn>
<d>9</d>
</Subcolumn>
<Subcolumn>
<d>10</d>
</Subcolumn>
<Subcolumn>
<d>11</d>
</Subcolumn>
</SubColumnTitles>
<XColumn Width="51" Subcolumns="1" Decimals="15">
<Title></Title>
<Subcolumn></Subcolumn>
</XColumn>
<XAdvancedColumn Version="1" Width="51" Decimals="15" Subcolumns="1">
<Title></Title>
<Subcolumn></Subcolumn>
</XAdvancedColumn>
<YColumn Width="924" Decimals="9" Subcolumns="11">
<Title>Basal</Title>
<Subcolumn>
<d>0.288093705</d>
<d>0.263309415</d>
<d>0.267204853</d>
<d>0.356686758</d>
<d>0.293540733</d>
<d>0.342601033</d>
</Subcolumn>
<Subcolumn>
<d>0.370707734</d>
<d>0.320174974</d>
<d>0.328854831</d>
<d>0.365840871</d>
<d>0.292247442</d>
<d></d>
</Subcolumn>
<Subcolumn>
<d>0.455696779</d>
<d>0.54078676</d>
<d>0.560245013</d>
<d>0.415610653</d>
<d></d>
<d></d>
</Subcolumn>
<Subcolumn>
<d>0.336134454</d>
<d>0.323389356</d>
<d>0.47394958</d>
<d>0.450210084</d>
<d></d>
<d></d>
</Subcolumn>
<Subcolumn>
<d>0.091112851</d>
<d>0.195378136</d>
<d>0.26179383</d>
<d></d>
<d></d>
<d></d>
</Subcolumn>
<Subcolumn>
<d>0.53510683</d>
<d>0.425272331</d>
<d>0.441975309</d>
<d>0.458622227</d>
<d>0.357453911</d>
<d>0.501494477</d>
</Subcolumn>
<Subcolumn>
<d>0.565626687</d>
<d>0.510239105</d>
<d>0.611966834</d>
<d></d>
<d></d>
<d></d>
</Subcolumn>
<Subcolumn>
<d>0.464647086</d>
<d>0.364861097</d>
<d></d>
<d></d>
<d></d>
<d></d>
</Subcolumn>
<Subcolumn>
<d>0.45477125</d>
<d>0.557234711</d>
<d>0.478989568</d>
<d></d>
<d></d>
<d></d>
</Subcolumn>
<Subcolumn>
<d>0.274509804</d>
<d>0.325164706</d>
<d>0.307188235</d>
<d></d>
<d></d>
<d></d>
</Subcolumn>
<Subcolumn>
<d>0.25276872</d>
<d>0.285989752</d>
<d>0.337345134</d>
<d></d>
<d></d>
<d></d>
</Subcolumn>
</YColumn>
<YColumn Width="924" Decimals="9" Subcolumns="11">
<Title>Apical</Title>
<Subcolumn>
<d>0.613645764</d>
<d>0.640858272</d>
<d>0.702703759</d>
<d>0.991589722</d>
<d>1</d>
<d>0.576187409</d>
</Subcolumn>
<Subcolumn>
<d>0.688346008</d>
<d>1</d>
<d>0.848907471</d>
<d>0.811495117</d>
<d>0.556061601</d>
<d></d>
</Subcolumn>
<Subcolumn>
<d>1</d>
<d>0.970467051</d>
<d>0.941632838</d>
<d>0.835444095</d>
<d></d>
<d></d>
</Subcolumn>
<Subcolumn>
<d>0.849229692</d>
<d>1</d>
<d>0.92605042</d>
<d>0.896358543</d>
<d></d>
<d></d>
</Subcolumn>
<Subcolumn>
<d>1</d>
<d>0.965522382</d>
<d>0.785957981</d>
<d>0.519062706</d>
<d></d>
<d></d>
</Subcolumn>
<Subcolumn>
<d>0.818736383</d>
<d>0.808495458</d>
<d>1</d>
<d>0.823628789</d>
<d>0.586069386</d>
<d></d>
</Subcolumn>
<Subcolumn>
<d>1</d>
<d>0.754801388</d>
<d>0.578480524</d>
<d></d>
<d></d>
<d></d>
</Subcolumn>
<Subcolumn>
<d>1</d>
<d>0.696972679</d>
<d></d>
<d></d>
<d></d>
<d></d>
</Subcolumn>
<Subcolumn>
<d>0.921961253</d>
<d>1</d>
<d>0.664665673</d>
<d></d>
<d></d>
<d></d>
</Subcolumn>
<Subcolumn>
<d>0.958603922</d>
<d>1</d>
<d>0.631807843</d>
<d></d>
<d></d>
<d></d>
</Subcolumn>
<Subcolumn>
<d>0.868080005</d>
<d>1</d>
<d>0.678062925</d>
<d></d>
<d></d>
<d></d>
</Subcolumn>
</YColumn>
</Table>
<Table ID="Table38" XFormat="none" TableType="OneWay" EVFormat="AsteriskAfterNumber">
<Title>Copy of 9hpf</Title>
<RowTitlesColumn Width="84">
<Subcolumn></Subcolumn>
</RowTitlesColumn>
<YColumn Width="84" Decimals="9" Subcolumns="1">
<Title>Basal</Title>
<Subcolumn>
<d>0.288093705</d>
<d>0.263309415</d>
<d>0.267204853</d>
<d>0.356686758</d>
<d>0.293540733</d>
<d>0.342601033</d>
<d>0.370707734</d>
<d>0.320174974</d>
<d>0.328854831</d>
<d>0.365840871</d>
<d>0.292247442</d>
<d>0.455696779</d>
<d>0.54078676</d>
<d>0.560245013</d>
<d>0.415610653</d>
<d>0.336134454</d>
<d>0.323389356</d>
<d>0.47394958</d>
<d>0.450210084</d>
<d>0.091112851</d>
<d>0.195378136</d>
<d>0.26179383</d>
<d>0.53510683</d>
<d>0.425272331</d>
<d>0.441975309</d>
<d>0.458622227</d>
<d>0.357453911</d>
<d>0.501494477</d>
<d>0.565626687</d>
<d>0.510239105</d>
<d>0.611966834</d>
<d>0.464647086</d>
<d>0.364861097</d>
<d>0.45477125</d>
<d>0.557234711</d>
<d>0.478989568</d>
<d>0.274509804</d>
<d>0.325164706</d>
<d>0.307188235</d>
<d>0.25276872</d>
<d>0.285989752</d>
<d>0.337345134</d>
</Subcolumn>
</YColumn>
<YColumn Width="84" Decimals="9" Subcolumns="1">
<Title>Apical</Title>
<Subcolumn>
<d>0.613645764</d>
<d>0.640858272</d>
<d>0.702703759</d>
<d>0.991589722</d>
<d>1</d>
<d>0.576187409</d>
<d>0.688346008</d>
<d>1</d>
<d>0.848907471</d>
<d>0.811495117</d>
<d>0.556061601</d>
<d>1</d>
<d>0.970467051</d>
<d>0.941632838</d>
<d>0.835444095</d>
<d>0.849229692</d>
<d>1</d>
<d>0.92605042</d>
<d>0.896358543</d>
<d>1</d>
<d>0.965522382</d>
<d>0.785957981</d>
<d>0.519062706</d>
<d>0.818736383</d>
<d>0.808495458</d>
<d>1</d>
<d>0.823628789</d>
<d>0.586069386</d>
<d>1</d>
<d>0.754801388</d>
<d>0.578480524</d>
<d>1</d>
<d>0.696972679</d>
<d>0.921961253</d>
<d>1</d>
<d>0.664665673</d>
<d>0.958603922</d>
<d>1</d>
<d>0.631807843</d>
<d>0.868080005</d>
<d>1</d>
<d>0.678062925</d>
</Subcolumn>
</YColumn>
</Table>
<Table ID="Table28" XFormat="numbers" YFormat="replicates" Replicates="6" TableType="XY" EVFormat="AsteriskAfterNumber">
<Title>10hpf</Title>
<RowTitlesColumn Width="32">
<Subcolumn></Subcolumn>
</RowTitlesColumn>
<SubColumnTitles OwnSet="0">
<Subcolumn>
<d>1</d>
</Subcolumn>
<Subcolumn>
<d>2</d>
</Subcolumn>
<Subcolumn>
<d>3</d>
</Subcolumn>
<Subcolumn>
<d>4</d>
</Subcolumn>
<Subcolumn>
<d>5</d>
</Subcolumn>
<Subcolumn>
<d>6</d>
</Subcolumn>
</SubColumnTitles>
<XColumn Width="51" Subcolumns="1" Decimals="15">
<Title></Title>
<Subcolumn></Subcolumn>
</XColumn>
<XAdvancedColumn Version="1" Width="51" Decimals="15" Subcolumns="1">
<Title></Title>
<Subcolumn></Subcolumn>
</XAdvancedColumn>
<YColumn Width="504" Decimals="9" Subcolumns="6">
<Title>Basal</Title>
<Subcolumn>
<d>0.968579874</d>
<d>0.505236688</d>
<d>0.76728113</d>
<d>0.92773365</d>
<d></d>
<d></d>
<d></d>
</Subcolumn>
<Subcolumn>
<d>0.78269134</d>
<d>0.47826168</d>
<d>0.493278172</d>
<d>0.478462943</d>
<d>0.473517079</d>
<d>0.478503941</d>
<d></d>
</Subcolumn>
<Subcolumn>
<d>0.688525719</d>
<d>0.424603975</d>
<d>0.281803741</d>
<d>0.555212386</d>
<d>0.661156822</d>
<d>0.494243433</d>
<d>0.473922088</d>
</Subcolumn>
<Subcolumn>
<d>0.349611147</d>
<d>0.400358699</d>
<d>0.404359979</d>
<d>0.600239133</d>
<d>0.670195974</d>
<d></d>
<d></d>
</Subcolumn>
<Subcolumn>
<d>1</d>
<d>0.707404348</d>
<d>0.705052174</d>
<d>0.559343478</d>
<d></d>
<d></d>
<d></d>
</Subcolumn>
<Subcolumn>
<d>0.814926346</d>
<d>0.742855812</d>
<d>0.777792869</d>
<d>0.733794608</d>
<d>0.864493271</d>
<d>0.966215482</d>
<d>0.735478789</d>
</Subcolumn>
</YColumn>
<YColumn Width="504" Decimals="9" Subcolumns="6">
<Title>Apical</Title>
<Subcolumn>
<d>0.899455355</d>
<d>0.731881351</d>
<d>0.507540697</d>
<d>0.665898664</d>
<d></d>
<d></d>
<d></d>
</Subcolumn>
<Subcolumn>
<d>0.843763627</d>
<d>0.871392632</d>
<d>0.555367958</d>
<d>0.69783269</d>
<d>0.559150966</d>
<d>0.335439146</d>
<d></d>
</Subcolumn>
<Subcolumn>
<d>0.418643309</d>
<d>0.744886467</d>
<d>0.630807591</d>
<d>0.62674529</d>
<d>0.661427314</d>
<d>0.393580973</d>
<d>0.245902042</d>
</Subcolumn>
<Subcolumn>
<d>0.655612017</d>
<d>0.732281359</d>
<d>0.29718547</d>
<d>0.515677359</d>
<d>0.314648459</d>
<d></d>
<d></d>
</Subcolumn>
<Subcolumn>
<d>0.9718</d>
<d>0.796708696</d>
<d>0.645121739</d>
<d>0.913043478</d>
<d></d>
<d></d>
<d></d>
</Subcolumn>
<Subcolumn>
<d>0.797614982</d>
<d>0.959342937</d>
<d>0.89576704</d>
<d>0.607473263</d>
<d>0.790800646</d>
<d>0.875665523</d>
<d>0.970150412</d>
</Subcolumn>
</YColumn>
</Table>
<Table ID="Table34" XFormat="none" TableType="OneWay" EVFormat="AsteriskAfterNumber">
<Title>Copy of 10hpf</Title>
<RowTitlesColumn Width="84">
<Subcolumn></Subcolumn>
</RowTitlesColumn>
<YColumn Width="84" Decimals="9" Subcolumns="1">
<Title>Basal</Title>
<Subcolumn>
<d>0.968579874</d>
<d>0.505236688</d>
<d>0.76728113</d>
<d>0.92773365</d>
<d>0.78269134</d>
<d>0.47826168</d>
<d>0.493278172</d>
<d>0.478462943</d>
<d>0.473517079</d>
<d>0.478503941</d>
<d>0.688525719</d>
<d>0.424603975</d>
<d>0.281803741</d>
<d>0.555212386</d>
<d>0.661156822</d>
<d>0.494243433</d>
<d>0.473922088</d>
<d>0.349611147</d>
<d>0.400358699</d>
<d>0.404359979</d>
<d>0.600239133</d>
<d>0.670195974</d>
<d>1</d>
<d>0.707404348</d>
<d>0.705052174</d>
<d>0.559343478</d>
<d>0.814926346</d>
<d>0.742855812</d>
<d>0.777792869</d>
<d>0.733794608</d>
<d>0.864493271</d>
<d>0.966215482</d>
<d>0.735478789</d>
</Subcolumn>
</YColumn>
<YColumn Width="84" Decimals="9" Subcolumns="1">
<Title>Apical</Title>
<Subcolumn>
<d>0.899455355</d>
<d>0.731881351</d>
<d>0.507540697</d>
<d>0.665898664</d>
<d>0.843763627</d>
<d>0.871392632</d>
<d>0.555367958</d>
<d>0.69783269</d>
<d>0.559150966</d>
<d>0.335439146</d>
<d>0.418643309</d>
<d>0.744886467</d>
<d>0.630807591</d>
<d>0.62674529</d>
<d>0.661427314</d>
<d>0.393580973</d>
<d>0.245902042</d>
<d>0.655612017</d>
<d>0.732281359</d>
<d>0.29718547</d>
<d>0.515677359</d>
<d>0.314648459</d>
<d>0.9718</d>
<d>0.796708696</d>
<d>0.645121739</d>
<d>0.913043478</d>
<d>0.797614982</d>
<d>0.959342937</d>
<d>0.89576704</d>
<d>0.607473263</d>
<d>0.790800646</d>
<d>0.875665523</d>
<d>0.970150412</d>
</Subcolumn>
</YColumn>
</Table>
<Table ID="Table29" XFormat="numbers" YFormat="replicates" Replicates="4" TableType="XY" EVFormat="AsteriskAfterNumber">
<Title>11hpf</Title>
<RowTitlesColumn Width="84">
<Subcolumn></Subcolumn>
</RowTitlesColumn>
<SubColumnTitles OwnSet="0">
<Subcolumn>
<d>1</d>
</Subcolumn>
<Subcolumn>
<d>2</d>
</Subcolumn>
<Subcolumn>
<d>3</d>
</Subcolumn>
<Subcolumn>
<d>4</d>
</Subcolumn>
</SubColumnTitles>
<XColumn Width="51" Subcolumns="1" Decimals="15">
<Title></Title>
<Subcolumn></Subcolumn>
</XColumn>
<XAdvancedColumn Version="1" Width="51" Decimals="15" Subcolumns="1">
<Title></Title>
<Subcolumn></Subcolumn>
</XAdvancedColumn>
<YColumn Width="336" Decimals="9" Subcolumns="4">
<Title>Basal</Title>
<Subcolumn>
<d>0.313194901</d>
<d>0.632187823</d>
<d>0.546157099</d>
<d></d>
</Subcolumn>
<Subcolumn>
<d>0.912114014</d>
<d>0.693058432</d>
<d></d>
<d></d>
</Subcolumn>
<Subcolumn>
<d>0.606069249</d>
<d>0.834118847</d>
<d>0.826457418</d>
<d></d>
</Subcolumn>
<Subcolumn>
<d>0.517607274</d>
<d>0.306050829</d>
<d>0.490736555</d>
<d>0.616691109</d>
</Subcolumn>
</YColumn>
<YColumn Width="336" Decimals="9" Subcolumns="4">
<Title>Apical</Title>
<Subcolumn>
<d>0.650556704</d>
<d>0.524891165</d>
<d>0.391493626</d>
<d></d>
</Subcolumn>
<Subcolumn>
<d>1</d>
<d>0.698865558</d>
<d>0.764845606</d>
<d>0.852993824</d>
</Subcolumn>
<Subcolumn>
<d>0.97259854</d>
<d>0.77754763</d>
<d>0.748673778</d>
<d></d>
</Subcolumn>
<Subcolumn>
<d>0.291961559</d>
<d>0.654652427</d>
<d>0.720188409</d>
<d>0.448592971</d>
</Subcolumn>
</YColumn>
</Table>
<Table ID="Table30" XFormat="none" TableType="OneWay" EVFormat="AsteriskAfterNumber">
<Title>Copy of 11hpf</Title>
<RowTitlesColumn Width="84">
<Subcolumn></Subcolumn>
</RowTitlesColumn>
<YColumn Width="84" Decimals="9" Subcolumns="1">
<Title>Basal</Title>
<Subcolumn>
<d>0.313194901</d>
<d>0.632187823</d>
<d>0.546157099</d>
<d>0.912114014</d>
<d>0.693058432</d>
<d>0.606069249</d>
<d>0.834118847</d>
<d>0.826457418</d>
<d>0.517607274</d>
<d>0.306050829</d>
<d>0.490736555</d>
<d>0.616691109</d>
</Subcolumn>
</YColumn>
<YColumn Width="84" Decimals="9" Subcolumns="1">
<Title>Apical</Title>
<Subcolumn>
<d>0.650556704</d>
<d>0.524891165</d>
<d>0.391493626</d>
<d>1</d>
<d>0.698865558</d>
<d>0.764845606</d>
<d>0.852993824</d>
<d>0.97259854</d>
<d>0.77754763</d>
<d>0.748673778</d>
<d>0.291961559</d>
<d>0.654652427</d>
<d>0.720188409</d>
<d>0.448592971</d>
</Subcolumn>
</YColumn>
</Table>

<!--Analyses, graphs and layouts as compressed binary. Don&apos;t edit this part of the file.-->

<Template dt:dt="bin.base64" xmlns:dt="urn:schemas-microsoft-com:datatypes">eF7svQmcXUd1J3xey7LasiVLLMFAjMvGNsJIrbcvtrBbC8YG2/SHN9ax2tKz1Xar
u9Pd8gIBmi0hgwdkkoANDMhsMWYm4ySAw4QEhTgsWZ0JDh5CQAlL2CY4w+T7nC8L
U/9bdd6td1/VffVuv1a/btX/96t+1VV16p6quvecU3XueW9s96WXvvClO8u5hdOI
6HDucG5Ipv30sqH76IAsEWuoDfj/JJ3/Yo5oSP7fpKm2Nmm4nF6QLIowtDD2HKKd
MrdZJlx5rUz/R17hWfLzZJlKRmsh0yaZ8jLldALA2bBMGAvXo7+6TE+SaYdMT5Fp
VKYny7RHpqfKdJlMPyPTFTI9TaYxmc6Q6RqZni7Ty2R6hkxlmZ4p0/ky/axM58h0
JikeAwICAgICAhYPGB7Q57AD1sl0Cindvl6mU0np+A0ybZTpdFI2whDFtkBAQEBA
QEDA8gO6mfU59Dj0Oety6HHoc9bl2Ltj3449O/bp2LNjn449Ovbn2ItjX449Ovbj
2IvzPvwsUucDZ5Panz9bpnNlOo/Uvv05Mm2R6bkyXSDT82TaKtM2mUZk2k7q3KAg
U5HUuQP2/QEBAQEBAQEBAQEBAQEBAQEBAQEBAQGDgjW0S/69cA3R3SfFn/746U9/
So9TjtadjhN7ou8Pja2t08lt/w2fzl2uVb73k+gxnMV74P2048wz/5ty2b/31NLw
flyKLov+xyt5/XLlnxY5F0ycuWPHJXccnBS3NWfnJqannn9OYSR/jmhO7ZvePzF1
8/PPufaaS7fVz7nk4vU7zt7zkt3XvHzsBWJmcmJuXoxdu+uKy3eLc7Zt375zZmay
uX37nmv2iLErLr/6GiH72L79BVedI845MD8/c+H27bfffvvIOFqN7Js+iIZz28dm
p2eas/N3XiE72yYJRvbP7z9HXkb13saOLN0/sW/+4vWn7Li1eefFsgvd2czsxNT8
yNj4zc1Lp2cPjs+PqI95yfkYqpqzO7aDQhLqDuw9zE/su7U5P7Jvtjk+P92iOWXH
3Lysvtlofsv0jartju26rkuXE/PNgztnZ8fvjDsdx7/IxUw5+vAZGGg1K9dPzDYn
m3NzN+y63mTP0blmcG5+fL556eT4zWaHuMLNzdmL8zu2czbid3trFrfzKFpl1osY
Ixi78rLp2YnXTE/Nj0++tDm3WhbGMSxQSqYnL64Vd2yPMu7ejv9KvGR2oikZnpdP
2OpZB8ugzBkstM+gvcPjvxRX7xuflNO0epYhMSDQRPd/YQCfg+ukAprYt8rkkWVQ
rUUYSGnEDK+6R8ExsNZqDMgjMXfoxmvUdWbGpUl2w8TUTdM38JzZ1mLsyrGxPWNo
u3t6f/Oq8YPNeKpa82O9lGPVfJcttdPOdTMXzly5rqMwONpZbrelUlmwrZNzoYyV
MpbKXL8Wl9fMjk/NTUaq7eqIl4jtFT3xHkMy2Fv+VbhmYvrm8U4eV9S0O8Zg8DMx
N71tfJnnOnmlNpG6c/8th+bmm/tR+NLmvpaAWkkLkezGb4CJXlNmOb0q0jj1Qt3U
PVxcqbWpJHOR8J+N+WW/D+TdvMpvhOQIE93y4m0rtBl3XYrrpbytuFIvDfIdIKfi
cmmdjMS6e8/EweYUjopWxw3gM8BErymznF6lFrxRsd0H9XL7XTO490GHOlst698x
MIPJwdTTMfPXTo279NgqWZ6UESa6TZnn9Cr1IK5ITW2fp6QiW4W3QnKIiX55+RxK
2VG8snX1zMx+qzhbFavvGpzB6HLvXR1X2jl2+XXKyRaviGYznx8p5n2Py+bvnDHW
tGNxEhN2TXKhWsymXaOTVxerab2YnLoZZRM8ySkzumN75KG8eP3JCyqQa13kWlbY
OTsxPhk7V7vis+hCQ/WjvsSl134OGw5i1Y/q+LLm5G1NOfzxuDoVnf2ob70Z2Yk5
ElffefDG6ck5cen45OSN4/tujRsnYPZz8ujronC3n0q8PsodO5voV6LQNwBhZeo/
EKGV+g8jiP8DH/F/3N/bo9zoT4l+lb6C2Hhdnp3b8LU5AQEBAQEByw0o5ve1vmbv
C3TbEFskAQHHE0Ojjcjex9c14IsUrhyfmtp2/YGJ+anmnWK+OTcvpm8Su6dn7sRn
oXBg5iZaT1sS723CND1pSH2215yYwDTwHF2ov+sCE5Ojf1G1P/3t6BspbK/qwixH
SuKi1lYCRvWOiB7frmF+GwZ6dmFY/Lym9aXoN54fbRWGaIJi3KI/UX8k2m7gZkQy
W3ELEyalDT8gHi+AeUOv5neO4fvEsLdKfldJ8nvHun1XCTZE2AxhdOZ3lVwSzTKu
iCtHt8PJoFU8ow5lo1H/14zfeGhyfFbMNucOTc7PGbRoo7h/SvSJq/EWczTi96Xj
U7fOiZnJ6XnbJYee0tpxok5dEmzvac7tm52YmZ+4rSlwPCM3/xP7zCu3MBxvU5Wo
QBdR5/bGvIv1aoyV8G6MJfNujLX1bowp9W6Mu8XSeL0Q1NkYt5XZ+FSR0hjr6d0Y
N6p3Y9zR3o1x63s3xjPi3Rg3u3djPHXejfF4ejfGc+zdGA+td2NIBu/GECHejfHQ
ejeGmPBuDOnl3Rhizrsx5KF3YwhO78aQsJbGl9IeKVGesmWILsNNHBAQsCqAx7tN
CGhACGTBDdJOuUHaRid79fDjNwzqJ8/JDaQsL3xCKGpbCe0ypa9Evd7b2qR8LNKD
kZClSAJHCbW/Rq+j9rX5d9kBFOGYuG188lDTqFkkcm/47vXb3vOVS2T/P/33n9JT
cWEgZoEZZBauPnQQW9fZyEjeqSsXDXHLqGIhZ2GBVZKVhV26ctE4Oq5ZGLKwwIvB
LLRt66/VlYvHmGZhjYUFvm9aLDT3T4xP9W8J6NOXvfCCg4e/pe+FkywsYG8BJFjo
2xLQ4Rt/+x9+7pPf1SystbCApxBgFvZM3HRTc7Y5ta95odi5b/5QT+5QGx75s7c9
+3zxGc3CyRYWtP/QysJl0/tvbs5tu6J54KC8Q3TDXvHAeL324e2f1iysa7Hw8dYh
B2q4NbPA//MDC/hR8PMF+FGYssmPInAF+FEErgA/isAV4EcRuAL8KAJXgB9F4Arw
owhcAX4UgSvAjyJwBfhRHG+uGtonnPPyCeeDT9gHmIZOn3CO+uMTPodMnzAW7VxS
v4iAnl2IfcK+FP0G+4Rvw3A0btefqG/3CZutuIUJk9KG1eoTxpXAMTAa8duTT1iR
BZ9wsjGm1Ltx8Am3MBx8wgaGlWTwbhx8wi0MB59wQECAC3i824SABoRAFgSfcHrK
6hNGiyXzCX/g2vf86x2nfe0S2X+KT9hkYWl8wle8a1Sx4PIJO1nYxV0sFqOHNQsu
n7DJwtL4hB9/nWbB5RNuY6HfPuFP/Cd6RXHLd/S94PIJW1jo2xLQsw6vf2j9S5gF
l0/YZAHnMH31CS80cm8dmZzTLLh8wi4W+uITfuShJ997+0fu1ywEn7AvReAK8KMI
XAF+FIErwI8icAX4UQSuAD+KwBXgRxG4AvwoAleAH0XgCvCjMLlin/AQnRI5G1N9
wo10lzAOYcdmJ+YOin3TB2cOzTf3C7kDa94xvm9e6NMBsWVHfiSfzxeeu1XcfmBi
3wExP35rc05MTM1Pi/F9+6YPTc3PT8iC8YPTUzcrmrkRcdX0fFPMHxifFwen59ov
PoDA1He6hIeoPy7h88l0CT9Hpi0yPZdUzy7ELmFfin6DXcJvxnA03qI/Ud/uEjZb
cQsTJqUNq9UljKuAY2A04je4hO2Ng0u4heHgEjYwHFzCBoaDSzggIGDAgce7TQho
QAhkQXAJpyflEn73AvraSO+he6NPIuwiUfZTje9JBpAYWKcL6ThtBMEUcM+CUv+4
+A+N22Sr/K8vrGzoxovcJ88faM6Kmdnpm2fHD86J/dNianqer7qh7Ypz8jrNKQGC
phiXSfa+X1dtFTcemhe3Tx+a3C85mJtvju+X24KZ6dn5DZLx8Rl5gTsmDo7LS3ew
P7JhwzbtuGe1iAlZT9+WN8Y9o59ZQMlnRr8fWWHcgvHu0d7d/+hjidz/E1MffNM/
PuMVX164CDeZ2/1vstBn9/+E8pF+9iOjigWX+9/Jwi7dPDs0C0fu0iy43P8mC312
/2sW6ALNgsv938ZCf93/E1MPfPiMV5fP/OoligWX+9/CwuKXQGFi6otjv/XNu5/3
Q82Cy/1vsoAjtz66/yemvv1vV97448Y3NQsu97+LhT64/yemXv3Rr//zte/7G81C
cP/7UgSuAD+KwBXgRxG4AvwoAleAH0XgCvCjCFwBfhSBK8CPInAF+FEErgA/CpMr
dv+voVOiOOFU939h277m5CS5XwAwr3oiA9PQ+QLAGurPCwCgil8AuECm5xGOulTP
LsQvAPhS9Bv8AgBckQx20qC+/QUAsxW3MGFS2rBaXwDAFcAxMBrxG14AsDcOLwC0
MBxeADAwHF4AMDAcXgAICAgYcODxbhMCGhACWRBeAEhPWWPC8blETmG5Z/nW4Wf/
ybu2Xyj7T3EKmyz02Sms8MiVPx5VLLicwk4WdnEfi8Tjt39bs+ByCpss9NkprDB6
z8OaBZdTuI2F/jqFiX701YOfOv9Hf3uJYsHlFLaw0K8lIJr/+IV3/vHXf6BZcDmF
TRZwENNHp7A0qD987y9e/rd/oVlwOYVdLPTBKUx03Qc+cPnz/urPNQvBKexLEbgC
/CgCV4AfReAK8KMIXAF+FIErwI8icAX4UQSuAD+KwBXgRxG4AvwoTK7YKXySj1O4
GJzCfsA0dDqFT6L+OIVPI9MpvE2mEZm2k+rZhdgp7EvRb7BTGF9Qzjhff6K+3Sls
tuIWJkxKG1arUxgjAsfAaMRvcArbGwencAvDwSlsYDg4hQ0MB6dwQEDAgAOPd5sQ
0IAQyILgFE5PWZ3CKFkyp/Cv/N5nTns4t3OH7D/FKWyysCRO4SMf+ftRxYLLKexk
YRf3sUgcHf6mZsHlFDZZWBKnMFX+QLPgcgq3sdBvp/Bra++/8tEHukUKW1jo1xIQ
3bb2w9/40m3HNAsup7DJAg5i+uoU/ruPXf3NO976ec2CyynsYqEvTuGryv/hY82P
/oFmITiFfSkCV4AfReAK8KMIXAF+FIErwI8icAX4UQSuAD+KwBXgRxG4AvwoAleA
H4XJFTuF19IpkRsu1SlcjpzCcxS8wt2Aaej0Cq+l/niF82R6hQsyFWUqkerZhdgr
7EvRb7BX+D4MR+ND+hP17V5hsxW3MGFS2rBavcIoB8fAaMRv8ArbGwevcAvDwSts
YDh4hQ0MB69wQEDAgAOPd5sQ0IAQyILgFU5PWb3CMOiWzCu8de6x3/zBz7/iItl/
ilfYZGFJvMIzv/CdUcWCyyvsZGEX97FIiAu+pllweYVNFpbEK7xw52c1Cy6vcBsL
/fYKX3rbWVsffdljlygWXF5hCwv9WgKia68+5S1f+9TfaRZcXmGTBZzE9NUr/KW9
333oc+f9kWbB5RV2sdAXr/BbXv+dz///HwyhwjH8KAJXgB9F4ArwowhcAX4UgSvA
jyJwBfhRBK4AP4rAFeBHEbgC/CgCV4AfhckVe4VP9vn56Hr6z0fjvL8PP9XV7Ze6
2i8+gMDUd7qET6b+uITLZLqEKzJVZaqR6tmF2CXsS9FvsEv4QQxH4zf0J+rbXcJm
K25hwqS0YbW6hPGMgmNgNOI3uITtjYNLuIXh4BI2MBxcwgaGg0s4ICBgwIHHu00I
aEAIZEFwCacn5RJWPx+9Sf98NLQ3dpHoe6O82ANyUXblVBkD6wQdcVw2guHno5f1
56NxHyyR+39i6vW/fNpr3nr2li7uf5OFPrv/9Q8nv/7+UcWCy/3vZGGXbp4d/NvN
79AsuNz/Jgt9dv8zC1s1Cy73fxsL/XX/T0yd9bJ1R64a+voligWX+9/CwuKXQGFi
qrLxXXf/06u6fVO4yQKO3Pro/p+YevHDP/vm9z/EL0G43P8uFvrg/p+YuudrEx/+
h6mvaRaC+9+XInAF+FEErgA/isAV4EcRuAL8KAJXgB9F4ArwowhcAX4UgSvAjyJw
BfhRmFyx+3+dzzeF18M3hfsB09D5AsA66s8LAHUyXwBoEK6BetWzC/ELAL4U/Qa/
APBZDEfjd/Un6ttfADBbcQsTJqUNq/UFADyl4BgYjfjt6QUAdcnwAkCyMabUu3F4
AaCF4fACgIFhJRm8G4cXAFoYDi8ABAQEuIDHu00IaEAIZEF4ASA9ZY0Jh9m1RE5h
orM/f95rXjB1e0n2n+IUNlnos1NY4bLGmp2KBZdT2MnCLu5jkRA/+N+jigWXU9hk
oc9OYYWFl/25ZsHlFG5job9OYaLf+8jrvnfXFeyLdDmFLSz0awmI3rLjL8b/7ch3
NAsup7DJAg5i+ugUJnrRV87964P/9IhmweUUdrHQB6cw0V3bXv2P05cxC8Ep7EsR
uAL8KAJXgB9F4ArwowhcAX4UgSvAjyJwBfhRBK4AP4rAFeBHEbgC/ChMrtgpPEyn
RD/lm+oULlTDV4V7AtPQ6RYepv64hXdECfTwOD1fposJDizVswuxW9iXot9gt/CX
MRyNP9KfqG93C5utuIUJk9KG1eoWxnMKjoHRiN+e3MKKLLiFk40xpd6Ng1u4heHg
FjYwrCSDd+PgFm5hOLiFAwICXMDj3SYENCAEsiC4hdNTVrcwSpfMLfxfn3rw6+/5
3v9pyP5T3MImC0viFj760m5fFe5kYRf3sVh881HNgsstbLKwJG5heuEnNQsut3Ab
C/12C7/qf/791s3/vVussIWFvi0BvfdVhS8N/eTbmgWXW9hkAUcxfXULP/i5f/rC
967v9lXhLhb64hb+h8ee9uMzPvUnmoXgFvalCFwBfhSBK8CPInAF+FEErgA/isAV
4EcRuAL8KAJXgB9F4ArwowhcAX4UJlfsFj7Fxy1cKga3sCcwDZ1u4VOoP27hUTLd
wjtl2iXTblI9uxC7hX0p+g12C3+VYjymP1Hf7hY2W3ELEyalDavVLbyFFMfAaMRv
cAvbGwe3cAvDwS1sYDi4hQ0MB7dwQEDAgAOPd5sQ0IAQyILgFk5PWd3CMI6WzC38
ptFPzn7nldtqsv8Ut7DJwpK4hen6H4wqFlxuYScLu7iLRWLhqY9pFlxuYZOFpXEL
f+/XNQsut3AbC/12C39279//9ee+97eXKBZcbmELC/1aAqJ3NX68/cyLvq9ZcLmF
TRZwFNNXt/DL9p01dujyP9UsuNzCLhb64hZ+OP/gy//x/wtu4Rh+FIErwI8icAX4
UQSuAD+KwBXgRxG4AvwoAleAH0XgCvCjCFwBfhSBK8CPwuSK3cLrfdzC1XxwC3sC
09DpFl5P/XEL7yHTLfwCwlk40QtJ9exC7Bb2peg32C38LQxH49v6E/XtbmGzFbcw
YVLasFrdwheQ4hgYjfgNbmF74+AWbmE4uIUNDAe3sIHh4BYOCAgYcODxbhMCGhAC
WRDcwukpq1sY9s6SuYXffe0P75n5tc93+RJpk4UlcQuPnvzDUcWCyy3sZGEX97FI
jD7jq5oFl1vYZGFp3MJfP6xZcLmF21jot1v49W/fc+7f/9vfXKJYcLmFLSz0awmk
/faDD7770R90cwubLOAopq9u4V+/7F+GH/7qo5oFl1vYxUJf3MKnnLvh2NFvMQvB
LexLEbgC/CgCV4AfReAK8KMIXAF+FIErwI8icAX4UQSuAD+KwBXgRxG4AvwoTK7Y
LXwqnULnUBe3cOnAzE0UXMLdgGnodAmfSv1xCV9Gpkv4cpleJNOLSfXsQuwS9qXo
N9gl/I8Yjsb/1p+ob3cJm624hQmT0obV6hLGuoNjYDTiN7iE7Y2DS7iF4eASNjAc
XMIGhoNLOCAgYMCBx7tNCGhACGRBcAmnp6wuYZgwS+YS/ur177vrZ79EF8r+U1zC
JgtL4hJe+NGfjSoWXC5hJwu7uI/F4thDmgWXS9hkYWlcwme8UbPgcgm3sdBvl/Bz
7mnc9ls/6RYpbGGhb0tAr3na7i++9tIfahZcLmGTBRzD9NUl/LF/f9KHDn/0f2gW
XC5hFwt9cQk/4/PPfcV1f8osBJewL0XgCvCjCFwBfhSBK8CPInAF+FEErgA/isAV
4EcRuAL8KAJXgB9F4ArwozC5YpfwaT4u4XK6SxhH+GOzE3MHxb7pgzOH5pv7hdyB
Ne8Y3zcv9OmA2LIjP5LP5wvP3SpuPzCx74CYH7+1OScmpuanxfi+fdOHpubnJ2TB
+MHpqZsVzdyIuGp6vinmD4zPi4PTc+0XH0Bg6jtdwqdRf1zCV5DpEr5Spqtkegmp
nl2IXcK+FP0Gu4T/HcPR4FsU9e0uYbMVt2iDq1xjtbqER0hxDIxG/AaXsL1xcAm3
MBxcwgaGg0vYwHBwCQcEBAw48Hi3CQENCIEsCC7h9KRcwu9eQF+b6T10b/RJhF0k
Wx7A9yQDSAys04V0nDaCYAq4Z0Gpf1z8h8ZtslX+1xdWNnTjRe6T5w80Z8XM7PTN
s+MH58T+aTE1Pc9X3dB2xTl5neaUAEFTjMske9+vq7aKGw/Ni9unD03ulxzMzTfH
98ttwcz07PwGyfj4jLzAHRMHx+WlO9gf2bBhm3bcs1rEhKynb8sb457Rzyyg5DOj
34+sMG7BePdo7+5/3AdL5P6fmDrzWQ88VDx39/Nxk7nd/yYLfXb/Tygf6cQnRhUL
Lve/k4Vdunl2aBZ+5h7Ngsv9b7LQZ/e/ZuH+Gc2Cy/3fxkJ/3f8TUx849+irP/mc
v7tEseBy/1tYWPwSKExMHf3Gt/7zK/7tB5oFl/vfZAFHbn10/09M7Zl/4cIVn/gL
zYLL/e9ioQ/u/4mpX/7gwy8pXsssBPe/L0XgCvCjCFwBfhSBK8CPInAF+FEErgA/
isAV4EcRuAL8KAJXgB9F4ArwozC5Yvf/Bh/3fyXd/W9e80QGpqHT/b+B+uP+HyPT
/f//yPRSma4m1bMLsfvfl6LfYPf/qcbdc5rOo77d/W+24hYmTEobVqv7P0+KY2A0
4je4/+2Ng/u/heHg/jcwHNz/BoaD+z8gIGDAgce7TQhoQAhkQXD/p6esEeEwNJbI
JUx0243/+vF7f+Ffuvx2tMlCn13CCkfXfGVUseByCTtZ2MV9LBa7P6tZcLmETRb6
7BLWOHq9ZsHlEm5job8uYaLDjbe++HXTX7tEseByCVtY6NsS0D8c+93n0vyPNAsu
l7DJAo5h+ugSJrribf/vujff8Q3Ngssl7GKhDy5honM+c9+fvfGP/kazEFzCvhSB
K8CPInAF+FEErgA/isAV4EcRuAL8KAJXgB9F4ArwowhcAX4UgSvAj8Lkil3CG31c
wtV0lzCcA314+77by/ftFx9AYOo7XcIbqT8u4WvIdAlfK9N1Ml1PqmcXYpewL0W/
wS7hM4y75+k6j/p2l7DZiluYMCltWK0u4SIpjoHRiN/gErY3Di7hFoaDS9jAcHAJ
GxgOLuGAgIABBx7vNiGgASGQBcElnJ7MiPDTdUQ4VD12kWwfACEi/MSNCMd9sETu
/4mphxcar/nz//KNKm4yt/vfZKHP7n8dC73rC6OKBZf738nCLt08OzQLa39Ds+By
/5ss9Nn9r1k4erVmweX+b2Ohv+7/ial//61nzf7eCDu+Xe5/CwuLXwKFiSlRftf0
z3+jm/vfZAFHbn10/09M7frk2oMXvuOvNQsu97+LhT64/yem3r3mR3c99Pv8HkZw
//tSBK4AP4rAFeBHEbgC/CgCV4AfReAK8KMIXAF+FIErwI8icAX4UQSuAD8Kkyt2
/5/u4/6vpbv/4WLqw1FLt5OW9osPIDD1ne7/06k/7v+Xken+f7lMr5DplaR6diF2
//tS9Bvs/j/PuHvO13nUt7v/zVbcwoRJacNqdf+XSXEMjEb8Bve/vXFw/7cwHNz/
BoaD+9/AcHD/BwQEDDjweLcJAQ0IgSwI7v/0ZLr/N2j3P4wI7CKh8jfKiz0gF2VX
TpUxsE7QEcdlIxjc/8vq/sd9sGTu/60zv//aT3/6l7u4/00Wlsb9/54vjyoWXO5/
Jwu7dPPs0Cz8/oOaBZf732Rhidz/L9csuNz/bSz02/1/xu7/tWvi7X91iWLB5f63
sLD4JVCYmNpw1rv+snZ+N/e/yQKO3Prq/n/j655ZfPOxY5oFl/vfxUJf3P//9voz
b//jGrMQ3P++FIErwI8icAX4UQSuAD+KwBXgRxG4AvwoAleAH0XgCvCjCFwBfhSB
K8CPwuSqMTq8oHo4Jdo8FLbta05OUqePP8LQaFvHJzIwDTxHp1Jer8JphOMWoueT
muY36DSWU2lPSAOZriC1d0Y+CRx9XYqMrBP3rWs9AdhjH5GFfykfQVuZJokeR3zi
nkC70TcMRbXviL7IAcAnagC0Ykok9MhvJ1iYi5DPqV0/05wWuf8Y+AUApOjaM1zL
fdlrWajYa1mAJGs30A5dw+MevVMXeOZVD6AGB1l6OH2BeQDQE7hDHkeTyEdjy6ln
ldfFxClqbjZF5zkKP4lOTDFsfMJPCbyTRkmd+gDoxlwgXMa2YLisicO65bui4QKf
jm45xumjakjmjZEcEk833yTeQ8Kl8YkEpA+J768kcFkTPCRmHfcnI8l6tBrDalow
BG/We18Nnl8T9tWgttWoUzstTwMnUPBqgyskvjZPAf+Pz+QUoAwrDp7tU4Da65o3
N+fHJ/VMqP56XUSIOORtM5G8anIR1bxkHQGuvHNq4uAiB8CUvQ3glzTzsYNjWJs9
J0nWIDn5Bccu5k888hMdmAa7+cMmEJ6CIzpBwSGxwghpsBKbP8gngef6n5GRqw3z
x4SQab71cCrMy1ZforPv4/9Ri2RKWtwuyvxBKZtBAKsSlqls/gC2RxLAM4mHmGnS
zZ8NrVp4s9Hn6J2j3FjXohSvDyVrlSTkkaAWvUKouIyLpH7JoM7QBQtZhpJsnUhe
Ls24QFsW7pgKwDYklIGGjYvkNbKrp+TIWD3ZRtbNxuC3vbKNIKN6Sg6AKXsbgFs9
DWvWiulqaTSoJQ1Mg10t2Xbl/6rTT0IayMRqCXmAHw984nm+Gv/I1TbVEp6Ea+QD
db9xzIX6a+Tf+7Vawg3CRvrFmqZ9Vw4lIJic2jdfSD678kLueO3KN0S/EwfgTV6M
zLU7bt9rgwpXxOtavlRK2vJIQA0usBouFYgZNpFBBeJy6Mac6n6oQPTLCoTZtA0J
ZaDm5fYeklt12IbEd0oSbtWhWMedxkiyHq2G3l9jgr1Z73014gcuhn012vfXW6md
lqeBEyjM1eZh42YHXCvGO1L7sLMaLcnRs9FiG717S6pGgAcPyDaCjEZLcgBM2dsA
3EbLaYk9dRfjRY02WXwiAtNgN17YgAl76pWT2HhBHsD39vInnutH8I9c7eSeGmt6
f+vhVLhftvpXy5763LhJ9Dgq4wWly7WnPo9Un/Y99fmWWiUJeSQsCXHHuwwKc9RA
BhWGLljIMpRk64RdhdkNCvTLwh1TAdiGhDJzR9o5pKzqKTmyxeypsVxAthFkVE/J
ATBlbwNwq6dNenLLkVqac+ql0aCXNDANdr1k21R/JKfSr4Y0kIn1EvJJ4LkoISPr
bHrpiVw70RM5cd/718R6aS2p5/QjpHVD26Y6T+16Kcumupg7XpvqdFe3qmXZkqzd
EH2VAQBtj1lxbad98qo3jKJAi+9Nu2T1f+gVXEMOu/QtVtNEBn2Ly6Ebc1n7oW/R
L2srZtM2JJSBmm8t7yG59ZRtSHxXJuHWU4p13NWMJOvRaugNPNbem/XeVwPdJ2Ff
jfYN/B5qp+Vp4AQKXm1whcQrgsR8tKZD/4/y5HSgjLfF9unACHeNz/VodiTnhEWZ
bU7cu2J9HqPLs/Ef2U0zE/sWOQCm7G0Abrtps2atnr6dH41GmSw+EYFpsJtNSGw2
HdHp8TUq/UlIA5nYbEI+CTzPW5CRq530RQj5QM0bZ2uoF/LvvOGLYEUbmV4aoFBm
E0qTZpPQLZB8tvOlnDKbmGYwzSZVywLLXstazl7Lc2+vZavBXstzaK9lFW6vxff2
2Go30Pt1TZnUOptHH4OQVxxirSs0yBzifsOsLh2HrWxKuT2vtD4/vZhLcLqZ3Ca1
+aQDGYw4dIGuzUeejawk7Eac3aRGv2zIQGwwrEPSdinSEg4pyT6QLLPZpfdQezv0
ayZQ8JSxZETetEshjdgWBI9sVkHS8Nkapg4JeUgRJPQLmQHJgDw+8ZYNy02eYsgF
ALTJKea+IfHtU5zN1k3OM48vOaeA21RU/ENqANn4z2jrJgfAlL0NwG3rPkmyhkUs
VMMhoScwDf7W7pEhld4W0kCmK0hJN+STsFm7LC1ncjl6OKeIbGUsEfBZi0oUYmsX
pUlrF+jF2q3lTmxrdwNN6po6qfl2Wz39yasrYg4bdDyviHXBqDuv2Mo6e3BZc668
0nd817K+w/dOuaw88w4HMphE6AJdm7c6LmO79ZPaL83KQ7+swvG4MKxD0lYeaJdw
SMyaCfuQ2q28A9ROi37NBAqessVYeQBPGZ4rAOXJKUMZWz32KctmtSXnjfm1zZvb
6FH84ykFsvGf0WpLDoApexuA22p7srbaqvlgtXkC0+Bvte05SaUzQxrIxFYb8gDf
/PyQbdH/mFbbZoK7fjM9kYMMsJeBnoNl8MuOjNhqQ+lirbZ67sS22lQtC0N77VKc
Uapa1rTJ2g10v665iNRd4Lanlj+vuMVdAS23MrjFXYrZHkxuW1lt//Lzz5bDk8lt
/5qyAshgLKILdG0KDTbmkrAbi3b7F/22jDmjM+uQhlXfWKAlHBLH4JmwD6nd/v0I
tdOiXzOBgqdsMfYvpg4JeZ9TTvDOr5ACPN0X6f/RT3K6+TrQH/bpzmY7J+ecx2qb
c7fpqfhHArLxn9F2Tg6AKXsbgNt2foq2nUvqbf1gO3cHpsFuO9tei3z/GpVeG9JA
JradkU8iaTvzE4CH74j8+5e00VqmSSKpiM9R0nbVG4YM2/kSWvw3AJVzStYyTbCd
O2uz2c4bpPhU2ElqJd220vHLK66wgrto0LjCnYPZ6y9XrWxKuT2vtDaeMgBzBu6e
Qm67dVS3ZWQw8nA55M0HVmnhTtiNPLvdin7ZEBnVZbYhoQzULDS4LcM5JFwan0hA
+pBY3iTR7YVXyCtGkvVoNbTJHd1DcdMITtZ7Xw3eEpuwr0a7yX0XtdPyNHACBa82
uELiFem3yQ3wtO7U/6N9clq5P6gX+7RmM62Tc8tjss2t2zJV/O/S5dn4z2haJwfA
lL0NwG1aP1Wyhkkp2X88M8LQaDTGZPGJCEyDv1l92RqVLghpIBOb1cgnkTSrGXgS
BHV/bZZ12x5N025W7yb7kTQokHzM6kYumNVZzeoN9BZd8wJSs+w27pY2rzjBulxK
g8AJ7gHM0uI5aWVTyu15pW/xjACYG3CEb4p2GcV4ykxkMMNwOXRjPm5Kf3bCbobZ
jWL0yyYEs2kbEspMo9h7SG7jwTYklhZJdDOKIW0YSdaj1dBGMfrxZr331UiyCdhX
o90oXqB2Wp4GTqDg1QZXSLwiSMgvxigGeCohcgC0SU4l9wGFYJ/KbIZwcj55HLb5
dNuRin8IKiAb/xkN4eQAmLK3AbgN4Z/RhnA5GMI+wDT4G8JP5FT6bkgDmdgQRj4J
lyGMtb5G/r2fYjdPsgzd8YN6GWnzq80QfmFEESOLIXxhbuUbwhtas3A5qTlzG1a9
5VXPGO+LaCl6xlxhFJ09t7Ip5fa80jO4NwDwjivgB8ldBiDuLhMZTA5cDt2Ytxmb
BEnYTQ67AYh+WXUym7Yhocw0AL2H5FaatiHxU5JEUpEmtT6eMkaS9Wg1tAGI63qz
3vtqxD3EsK9GuwE4Ru20PA2cQMGr7WMAAjw1eGQBlCenBmVsENmnBqW9G3TJ+TEN
0yTc9pDiH4IByMZ/RoMuOQCm7G0AboPuadqgqwSDzgeYBn+D7u6TVbompIFMbNAh
nwSe5i3IyNVmgw4PCkyoJ3Kn0xVD6mG1leEGgd8Dn7gGnp52g+7FMi3WoLsot/IN
uuU62VS1rMzttdletlW1bOzba/mL7u21WFN37abU2s2ptepVcFctXoKz1W6IvmAd
uJLUfe0ydVdrXs0Anp2r6ESeAcgH3BUrdwZa2ZRye17ZgJDbAO4FzMTTyL3ZguQ3
kcG8x+XQjakC2PxOwm7e2zdb6JfNWmbTNiSUmZst7yG5DVrbkFiDJdFtswUNyEiy
Hq2G3mzhfvVmvffVQPdJ2FejfbP1BLXT8jRwAgWvts9mCzwiIQ+liYQ8Vh0Jedcr
KPi0vfWNMigV5KG2oCSQRz1OtHmhMfXIo+3TdR7q5pk6D7ozdR7gJYRKAcBbcgmZ
dxhH9iXEaHvfFCbXkefPto7uPZXiHwoByMZ/xk1hcgBM2dsA3JvCM/SmsBo2hT7A
NPhvCneuVWlTSAOZ8GDhuUTehughk6udfN3F5xdr8Cjjc0zTtG8KX0KL3xTuyIVN
4Ym0KdxAf2LUbJLJbfyujLwaEe7Jl9JqGhGeI6za4IyolU0pt+eV7QN5BWCtMDLc
p02dj6RGTj0RLPFMZDC/cTl0Y4o+Zct0wm5+2zdD6JfNOWbTNiSUmZsh7yG5DTnb
kFhyJ9FtMwTJz0iyHq2G3gyBC2/We18NHqQJ+2q0b4a+RO20PA2cQMGrPcibIYCX
BCIZwLWSS8K8QMnblyTb5ia5LjwftnVx7w0U/xDAQDb+M25ukgNgyt4G4N7cPF1v
bmphc+MDTIP/5ub7a1X6zZAGMvHmBvkk8DRvQUautrm5gdS7hvBFF2yidpbhBsFx
Dz6xhcHTM3qnubm5Wtcwsmxunp9T8pppwuams3Y1bW5U7abU2s2O2g30bV1zLal7
020Ir+y8Ginu8+voRBgpnlms8uCPtJVNKbfnlf0FmQlgbTFiHKw3dT6SXDn1VLLU
NZHBpGcRbYpfZU91wm7S2zdY6JdNSmbTNiSUmRss7yG5jUnbkFh7JNFtgwXtw0iy
Hq2G3mDhvvRmvffVYCe+CftqtG+wjlE7LU8DJ1Dwag/yBguzZfM2AbxUEPkAeEgu
FfMIA8S+VNk2Xsn14nmyrZd736L4hyAHsvGfceOVHABT9jYA98brGXrjVQ8bLx9g
Gvw3XiGIerATb7yQT8K18cKTIMg/iPplmqbdq3Q9LX7jdXEueJWybrziIOqXk5pl
t8G4tPk4iPoVNAic4B7ALC2ek1Y2pdyeV/oWzwiAuQFHzyC3oY2nzEQG0w6XQzfm
46b0Zyfspp3d0Ea/bEIwm7Yhocw0tL2H5DYebENiaZFEN0Mb0oaRZD1aDW1oox9v
1ntfjSSbgH01BjeIGiIHQJvkVHIfUAj2qcxmCCfnk8dhm0+3Han4h6ACsvGf0RBO
DoApexuA2xB+pjaEG8EQ9gGmwd8QDl/SOdiJDWHkk7AZwnh4cCzwkdwGeiKnzpFt
ZbhBcKyAz1eRNr/aDOFX0uIN4UtywRDOagirWhaiydr4SzpfTWol3ebe8cvHX9L5
H2jQuMKdg9nrL1etbEq5Pa809iv1f5gzcPdMcpvSeE5NZDDecDl0Yz6wbFwlYTfe
7KY0+mUjhNm0DQllpintPSS3+WEbEsubJJImSdJ+grxiJFmPVkOb0riHvFnvfTXY
sWjCvhor40s6IaIAtE9OK/cH9WKf1mxmdXJueUy2uXVbpYp/CDMgG/8ZzerkAJiy
twG4zeqf1VNbyAe72geYBn+7Onw50WAntquRT8JmVwN4EnzCFvhJ3atp2u3qG0Cl
qYEsdnU1t/Lt6vjLicZJzZnbyuotH3850Y20FD1jrjCKzp5b2ZRye14pGtwbAHjH
FWAyuKzBvbotI4P9gcvtpfbbTCmOTtjtD7s1iH5Zd+7VZbYhocy0Brktwzkkt9a0
DYmfkiS6WYN4yhhJ1qPV0NYgrrs3bhrByXrvqxH3EMO+Gsfvy4nG9f8oT04Nytgi
sk8NSnu36JLzY1qpSbgNIsX/jbo8G/8ZLbrkAJiytwG4Lboz2aIrBIvOB5gGf4tu
LKfSnpAGMrFFh3wSaRadoO6vDLA43K9p2i26fbT4k9JKbjAsug0E8QhAHGLcLlvI
lVc9gLebaDE9gH9wpXpoVXrllZDHugDgBT2dSW5rCitrIoP+xuXQjbnErF+TsOtv
uzWFfllvMZu2IaHMtKa8h+TWWLYh8R2aRDdrCnc4I8l6tBramsIQvFnvfTV4fk3Y
V6PdmqpTOy1PAydQ8GqDKyS+Nk8Bhgu4Vo+tDvsUYFS9W03JeWCryTYPbqND8Y8H
GsjGf0arKTkApuxtAG6r6VmSNfjEdk/P3CmmbxLp1pMabLL4RASmwW49sQWFR+CI
TtCPSKxvQhqsxNYT8gDf/PxYm9YT1+FZvUP+/TJttpYxUId0c6tE3RvKekIpn9cg
sR5hgerzQ+p4JvmleKR062lDq3aCVJ/t1gfbVrc4a3ENFnqddgePE7Vo9Sxy2x3m
nAAZNB26YGYYSux1wq7p7HYH+mXJj4kCbENCGWjY7ugcUjbNlRwXay7buLoZH1hK
IBv/GTVXcgBM2dsA3JrrLMlaSX5eOT41te36AxPzU807xXxzbh5qrE2dXXjN+I2H
JsdnxWxz7tDkPP/W8ffWqNTCUFBvDEyDW70hYeKuzqn0WuoUqSENTkqqNxNJ9Wbi
OTJ9KPHAJsv4kb61VaL+V+oNpeuMDlgC4zkDelFvTJOi3t5gqrdJUn2iFIj6ieQh
88pXPIuUdQ+RlVRR3BZf4I7UUlEbo08UIaM2B4cv160joByXE7nRy5F/ukxH1xy7
jMvHhkYT7Rfol+Xn23L3R+0xrL0nzUT5H8p0Te4pL0L+l2R6ZM1vR+VPlX/2DG2N
yv9GpseHTmvlf36Nyr9Jpk3DD3Zc65vy8+jw41E/H5DpwVMeaeUX1sf5sVNV/q9k
2nTycNTn78uU3/BEVP4lmZ6yjl70E7pjqF1VY3YEtS/tt21bFwsEuekEZatLgyA1
KwzfPgWtjLo0CFr5Y99M35dV35FJqvvJptg5NT5552ua++WDmts9PXno4JTYRcO5
3G1zI7SmVbQTRTAhhGlC0OZcTkiMidvGJw816VT17wvuGN8nzYtZMT4zMzt9x8TB
8fkmt7mEzm6jEXOHDh4cn72TnqyKr564eWriJmlFTc1P3in2T9x0U3O2OTUvtoyJ
HSI/kq889xJ6jmr6kqnmNlxl/vbpbfPjE5PN/fFFztK9HToI80bMjk/dOicmpsQ+
PZytu7hJm110LT0pl9ujL7qvKW5szt/ebE6Jg839E+NTc/QMTRP9i565P/oZR80u
rol7vVDs3Dd/SJqJlprLpvff3JzbdkXzwEHJFz1LtWhURkrV88Tuy9Exz8m+Jj0z
Zb53X34J/Wwu92hY7hNpueN9BRQyVLlc+Wj5gd43fK8ipZ04YvlJsu2zpJF0nqYp
0FPpUjqdrpUlr6Gn0d30PPosPVvqzGfTUE5RnpF7FlVzz6AxmW6R6S25c+hjubPo
D3NCbiR/RPG35AO4Dq6OTzagsRGDyQUxdp4uxxgLpELYUXcpKd8IDDWEqqMdTKbX
kAptx97pbpmeR+rtuM/K9GxSfUHDIx+Fz+fUiNHXGTl1behp+PkRKbOZlIcPefB4
i85jDG+R+XNIfZ3px3LKYAJ/fyjzQn7i9uTNJswugNeDjSskjB/j6NG4gutYmkUd
xtWITJtyomVc7dXGFWxUMbSprb0Jpn1wSNGi/diaTVEeQz+67mjUD/ILwyr/IpmO
nLQ3arMb5WvHWu2PnHb0MvRrA9q8DGnNQtQe+cd0viLTg8P5Vn7vKSqP/dTwWmUE
gre9p266fGUbV2kQ5O5T0MqoywpB7j4FDU7dZvoD+fdzlHQUbMjl9NHQyS1Vq866
1uZy+ZFSsVBDTSTZUSR1z1Aud9U0/l7T0ne0PpcrlItiqyjmG3RKLlcto0F+pFoo
lLeKqecXinQa/q/lG5Xo/7L6P9+oFypyg4lsvVqtIrstP1LIV0tiflrq2WKpUIB2
bzHw6GoZiF0hYmDAYhQiFAH+rqdnSgV0TqRsFJ4nyyry/4vldffI9CLaKOXZBmoa
57W3Svn0WpneLpXRu2W6TyqKT0uaT9NXol5jII+r45MdJs+kWCFC4eDa+B/KDW2g
PCApUY50Mak5QN0enYcShLSGWwvjhcSFAkTCqSfaQIZi3vCJ60PiIg9p/nZSfUDx
vVvnofjuI6X0kD5N6vpA2iGlkK2gaTwOKV8a2XYzk9Pz4XyyKzAN7vNJvpv+s07J
87CQBist5nzyjoScS5YhhzTVKlFSR51PotS8Kjsi9FHjkp5PTpPqc3RO/Y8Wsftt
xlKrDGweCfMjSBnXH8h1nl6aowa8HWyPtkRZrGjQGdgwJ6J3RcP9xq429Mu7B0wK
kBzcAV1muqo6BwcuTVebgt1T9WikELC4LT3vHiqaIW8bKtgxbaWk9w0rCSSHNKHL
0oeEO77N+6bgGhOUHjqLjRn3oPiivQ3KrezOluxeSF7Kbk9zbt/sxMz8xG1NMTc/
Pj8xNz+xLzjmugPT4FZ8fK7wmE5JQRvSYKXjofh+rlViKj6U3mXUsLzGcwYspeKb
JdWn6ZiLFR/0XbJWCVIeCfNzNilBepA6FR+3ZenYUnxfaBWjYD7670jHyRL2GKM5
dRqDSzxBh6N8dOK0Rp0aofyxnCpH+0dOynf0IwgnRdRqT2tU+zfJdHhN0iWn9iqj
J8UnRUdlPtkGe5uF9Xsv/wk9kmtX3PgUuhXD95RCkJtO0PGtS4MgN52gbHVpEOSm
E+SuS4MgN91m+u+k9pdXHTp4Y3MWOjNyBszRplzuyompiYOHDuJ4oFg5T4w1Z/c1
p+YnJptwe6hDe+j8Wmfd+B1MeGVTNjopl7t6fv+I2NO8bUKq3+kpNIpKXjA7Ox1d
NWr3pFzuiunbJRuNCg7ucVpx7cxM2/9opzwTOP54dIXzH5tLECEQPlgpjAfo3dzd
Q2ye4QwBf0+ls+hJVJDGzkXy88rofAFP+zDtlf/P6lOYt0mqezQlvjj/0/K/9uug
P1wFn+gDkgCH7TjDwA1VIGXG4c2xi3Q5xoVfUUR7KBjIGHxC1O/VbUADEQ0+cL23
kRoBzGXwgDzE/v2kzlgwj2zrgg7gOTqblNzDWQt4NQ//O0W0ab63y2nlpGk/ZUc5
5PFeUvIYedLeAOSPGPlRfdKP/DGZjzrQ4PIFLdeRFyepPOT6UYtcR5uZtXH7TSd3
9gmF/ODJOLkPctq/T0HuujQIctMJctelQZCbbrM0tpT9UCiqM95SvlqA8MqPlBu1
isrh3Fflao2Srm0UijpXzdcaKldocLt8pVKMjn9lN/VqURMXG1GHhcJIvaSOsd8o
r/y6Zbq6ZcNsCktMCgRKmrA0p9ImLNVO92QpjDbJ9AyZzpVpRB/Q1OXnLpmu0MLz
epkf13W3Eg6bk8IS/eEq+OTjQVwJebACTycLy3N1Hm3xcCMPwVXX+ejMQOeRYMWD
D1wPXweIMgjLcZ2HsIQAjA+MlbDUJzutOTqblLCcJB9h2XYwsDTSEhLsWMKPym1m
DGm5yZCWDzqk5V5DWpJDWh4J0lLDt09B7ro0CHLTCXLXpUGQm24z3U7qhi9oj1ix
Ucwr8VLJV+pa0OSVoIG8qkYSqTCSz+eVC65aq2shVcxXdTMprgp1Ja4qlQaLq0at
GtGWRxpJYXn8L247iDOFJeYEQmIphKUSODWZ3ynTi7WwvE7m90bXRGRAv4UlrgnB
VdPl+H+nziO9mGJheZ0ug7Dcq/MQlrdoOiDtwBG+yY1kuHJTv8wpHCIyMA3uQ0Re
8SM6heC1wU4wP7IcImJN70/InPtlq3/Vof8AapHUOZkC7g11iIhSfDKUTFGyA6mX
Q0SmSTlEnDEPEW8j1WdneBpKoW3stbgGy16zVplkPE7UotU55A5eM+cE8PatxYoA
XTAzjDRFYCLNo4Z+2crERAG2IaHMdD91DsnckiOvOLN7n9zjWkzwGpYSyMZ/h/ss
2wCYsrcBuDXXs8kneA3qLASv9QxMg1u9IWHiOHjtTdQpUkManJRVvWFD+fHEA5ss
40caRzlmmVJvKF2u4DWEVaPPTi8Y88q8P5vUqQGOXqNbPRerKG7b5f1qkIfgtZX8
frUgNSsM3z4FrYy6NAha+WMPwWsrMpopX8sWzRSC106o5Y73FVDIUOVy5UPwGqm9
0900OMFr/G02WA8kNq5+jtT4TZeMp3F1Q9RocILXYJgtrFWGGa577LRjbY4iE2jz
MoKzZyFqj/zjOo/pOjasjEM4fo7o4DUYbFvWPtji7cEQvKYxqHVZIcjdp6DBqdsc
GfkPU9JR0CXmq5yvRU4in5ivfDkvtopCoVaA/i3XGugrP1KtFooI8yqVVJhXtVpp
mP/n8+VauQi1LvPleqGk477y1VojrwK/CpVqFQrRiGBbTaOxq0aMDliMaoRK6CWM
7XS6OVJZClNSUr1epnfIa71XqqaPyl5/J3KWfSXqNQbyuDo+2XWyVGFsUH9QhzeT
6g/SdEp/4vqv13nI/ndoOqjA91IcxvZRUjMEFfg75OdoO5d8wtii48oQxtYDMA3u
k0q+m0IY28pIizmp9H2bH4GqDNwu6qSSv4CNwS4Jfei4pCeVP0+qT3sYG966SNYq
U5tHwiM7l5SpfTjXeY5pjhrwdrXZwtjQGdgwJ6J3RcP9xk439Mv7CEwKkBwcBzeY
TqvOwYHLvoSxJYeKZsxSEmDHtJqSfjisJJAcElxl3YeEO75PYWzJQfFFexuUW9md
Rz5hbJGyC2FsGYFpcCs+PmF4TKekoA1psNLxUHwwbRmx4kPpXUYNy2s8Z8BSKj54
5tCnPYxtwVKrBCmPhEeGMzEIUmyAkoqP27J0DGFsXSDITSfo+NalQZCbTlC2ujQI
ctMJctelQZCbLoSxLS//sbkEEQLhg5XCeIDezd09xOYZzhBWexibltnRHCGxiL6N
Ot0AnSLaNN/b5XQIzGAIctMJOr51aRDkphOUrS4Ngtx0gtx1aRDkposDM0olHRtR
L+iIiHIr6AEnvzq+oVZUsWBGbESpUlKVhYaqzI/kS6VKXsdGVGs64KyWL0WxEaXC
SKWojrIXSO2Vl+Hilu2yKSoxJRAnaaLSnEibqFT73NUal6FE5YL+H3OExKISt1V3
Udl2LLA0shL5YyHkl/pTlwZBbjpB2erSIMhNJ8hdlwZBbro45LclrsoVHUJbKVU4
6LbKZfWKigXLjzRqLNaqtbwuK+ZrukxKplYgWaOqiWvlciTYSpWRcl0JS+y28Agt
x9VtB3GmuMSsQEwshbhUInGlx/y6DxzPl61Ay2eLjRDF5gNMg/sMkRf8iE44LUJK
nl2FNBgJD1TaGeJzkZGrjTNEPlTHA/j03Kl0S+40a5kmaaU36jYA2qszRJTiEyVI
SqQo0YHUyxki06ScIc6YZ4hvJtVnZ5waSt/irMU1WPR2RrHxOFGLVueTO4rNnBPA
27UW6wF0wcww0vSAiTSHGvplMxMTBdiGhDLT+9Q5JHDZexRbclyLiWLDUgLZ+O/w
nmUbAFP2NgC34nqOZK1IXTxl0GYhiK1nYBrc2g0JE8dBbDC/khI1pMFJ3bRbmofs
fYnnNVnGT/RbWyXqf6XdULpcQWy/QKrPTh8Y84paJUnUqQFeMkhqKG7b5T1rkIcg
tpX8nrUgNSsM3z4FrYy6NAha+WMPQWwrM6qpni2qKQSxnVDLHW8roJChyuXKhyA2
Ulunu2lwgthgdgFYD9O4gqMN/5suGU/jCg52aZJ0GFemAwbG1agRxLapSxBbFDQ2
pF5OQnsOYhMyHVtDscE2rPp8EeHlpL1ROfIPrlV5TJXY0P0X2O4wgtie0Hnw//hw
7NQ5fIrKYz91xtojLd5mQhCbxqDWZYUgd5+CBqducxQUdZQSboLT0qK+diAmK1+A
c6cVcHWBBF47enlzDm3bI78ahSp+u6xaKUdxYNrPVNJxX2X942X1cqNg/l+u8xfJ
lqtF7V8q1es65KtSrBbwzpQRwLZaRmJXiRgZsBiVqM7ylBtsHeGHVRgXSBWjgteG
pWJaR1fSRnqlTBMRHwrTkvINMr1T0t8r04el2ngocpF9hdqD18zzQ/aYQOWwSjyb
lKrD/xdQ/MJVMniNjy+hKtEW7fCC1kZS432lzkMNTpCaM1xzWn+CJxwSIA95/k5S
/UH13avzUH0f1p9QfQ+Rn3tti2y1jXxOKUPsWg/ANLgPKPlmCrFrKyN1O6A03W8m
YBz5vsL/tlaJEjrqgBKl5lXZEaHPGpf0gBLneOjTHrv2Hy21ysLmkaBWiRhlYb8z
13l8aY4a8Haw2WLX0BnYMCeidz3D/cauNvTL2wdMCpAcHF73QBnLevvgwGVfYteS
Q0Uz5G1DBTumsZT0vmElgeSQOIQjfUi44/sUu5YcFF+0t0G5dd1zJbsN8tF1IXQt
IzANbr3H5wqP6ZSUsyENVuqm9yAp8HQuRu+9vVVi6j2U3mXUsLjGcwYspd7DddGn
PXTtP1lqlRzlkaBWiRslR9+s/0cF6z1uy8IxhK51gSA3naDjW5cGQW46Qdnq0iDI
TSfIXZcGQW66ELq2vPzH1hJECIQPVgrjAZQN1Am3tbuH2DrDycFqD11jlYI5MkX0
G/X/uJZbRJvWe7ucdoVjQO7uJSWnI9lshGA8aOTHjHCMxx3hGIeNcIy8EY5hk+to
s2CEYwhHOMbREI6h4dunIHddGgS56QS569IgyE23Ofq2xkMylfVvoOUbhUJ0Roxf
+CnpoDGc+fKZrvoKNPwwGv/+T6le0mFmhUKJIyIKtYr+EbRSua4blgv16Gi4WBip
F9rjMZbl8pYdsykuMS0QKWni0pxMm7hUW92TpahS36K2ns6Tabs+oWnIz90yxeJz
Pd2o6yapWzwGi8vNpMQdWHmmzkNcwseKPNpu13mILmxukcfYdus8EotUXA8iFWUQ
lzfqPMTlpKYDWFzC1gUwR6a4xNp2F5dtJwN+8hKyam+X8DXIrdEh5Q1F/hFHqO9e
Q16SIS+POOTlmCEvH19rl5eHg7zU8O1TkLsuDYLcdILcdWkQ5KbbHIWvw65ggVUp
NPi3IOv8M2hwiSHXirE1gm3rJZZlhQpH5+aL5XJFSataK3i3XldxZtXSSKGhhOUC
qRcQjv+1bedwpqjEjEBE9ENUmqFr8DopcVOV/4/K9CItKq+V+Ruia8Ib1k1Uoh0/
iywqk6FruA7aws+FPMRWVbfB/6M6j/QiikUlXmdhUXmDzkNUTmg6IO288QLZqkxd
zhsL2/Y1JydDDEDPwDR0P2pck1PpAHUeb4U0OOkKaj9q5GcJn8mjRr3U0foek38L
uZOsZQzcJEjvaJXw/zhqRCm85egBiSUNnjNgKY8a4clHn52HicwrajGmC0iZXniX
IhprLja9uG2X19RAvhpjAACOAQA4BgDgGAAgxAAwBrUuDYJW/thDDMDKfCk8n+2l
8BADcEItd7yBgkKGKpcrH2IASG2c7qbBiQGA2QVgPUzj6i3Uea61SOMqOn03YgAW
tHGFk6j8UPtJlAluc0zHAMDQOrxGGVpCpoWTlNcWfdL6OAZgRr/3j/3qljVvi/I4
udq7Lj3eAO2f0O2RXzhJ5YFN6xX/wING/n4dAwAcPm0mxABEGNS6rBDk7lPQ4NRt
pq+Teq2o/WgF2nbnlJTU5rvz1zVvbs7LknVtb8/vjIU6FGzqO/TlQqOIH4KpluHX
2IAfhqmUK+o4rlLNR2/OFyt51OB8rlGJCgq6oFhr6GO6Yrle07lCtaTepS/Wa3m4
oxP8PLrqR2hXoRgx0A8Vul7KpXVS4aizRmBE5htS5Vwmxf6YrLueNlIzOg/mXT9e
hdwse91M90n6T8j0KalmvixpOmMGTBXKZ5OQhKxCoepwbfwP3cCebrhuoPZwTbhF
UAb6Md0W7fBVWhtJjbdJ6rpQmzi5Bh2kLg4SUI50WH+Cl/tI9QdV+Qmdh6r8lP6E
qvwyKR6wImnnms+TV4PbyedcM0QN9ABMg/tIk2+nEDWwMlLySNMEHu9/Rkau9mLe
nry7VaLEjjrSRKl5Vdw5gD6dXNIjzXeR6tMeNYCzw2Stssl5JKjFXY69Aozq9+Q6
DzzNUQOLihpAZ2DDnIjeNQ33G0cNoF/ecGBSgOTgfkGXsbS3Dw61rM47xwgO8Kl8
bRgjlg36wjAB3MNFQ+RtwwVLpomVjBzAagLJYf2iLksfFu56bbb4jAqaD53Flo57
UHzR3gbl1nhbJbt4R81H44XYgYzANLi1H59HwBhEYgkU0mCmbtrPdOiZSGo6Wxk/
2r/SKjG1H0rvMmpYaOM5A5ZS+/0qqT7tsQPvttQqScojQS3u8q2kJClexUhqP27L
4jHEDnSBIDedoONblwZBbjpB2erSIMhNJ8hdlwZBbroQO7C8/Mf2EkQIhA9WCuMB
erd59xDbZzhBWO2xAxDtAObIFNG/RJ1Og04R3W7Dt0vq6Ayf2n9oHuWQyDPG27Cb
QvRA/O+S16VBkJtOULa6NAhy0wly16VBkJsujh7AAe+a6MXSPL+SWqxW9Xv3OAVW
uWqDT3vrhaL+zZlKvswnwAX+3YV8oVTVL6WWazX9swwV/fZqoVobqakXYt8iL72w
XJe37ptNkYmJgZhJE5nmdNpEprJ610mR1J/4AfSHq+CTTwo36zxYWY74Adi7AObI
FJn/kXxEZtv5wNJITEixxx3xAwvh5280fOvSIMhNJyhbXRoEuekEuevSIMhNF//8
DTxgkcgqtn5jplop8vv3pYaWOo2Sil4y3uKvVcv6Lf5ivsA/11UoNXTYVK1U1b3U
GgX1c135ykipPdxqOa5uO5EzxSVmBWJiKcSlEjm9//zNYsQlrgnRVdfl+H+XziNd
QbG4XOzP3yBKokxdTh6LIYYgGzAN3Y8cw+8IrIyE5y7rkaPv7wi8p1Wi/ldHjihd
rt8RgGRDn52HiswraiFXEP8E8wthndGtnovNL26b8TU3XE6s4BiC8DsCgCB3n4JW
Rl0aBK38sYcYghPqpfIQQ3BCLXe8gYJChiqXKx9iCEhtnO6mwYkhgNkFYD0wLjau
7qLOs61FGlfRCdQyxxCg/d51lHottH/ciCG4Q8cQgH/ScQPIH9F57KeO6BgC8LYQ
Ygg0BrUuKwS5+xQ0OHWb6a/l369S/Ia9OlpZojfsS4VarSG2inK9XIzesG/gG49O
wiFbqdqoR+/T5xvqffpKoRy9YI9vBokKCuWyfq2+UCnp87pCsaJfsC/UC1XLC/aP
rvYB2hUoBgz0Q4H2EkEAJaDwevn/O2U6IukfkOmTUsl8aaAiCNAeMhenyChHQqAc
PsHLEVL9QVE+oPNQlJ/Un1CU2CKDByxI2qnmCHlEEOhTzRBB0AMwDe4DTb6dQgTB
ykjdDjQfQUautu1A0/cdyve2SpTYUQeaKDWvijsH0GeTS3qg+T5SfdojCN5vqVUW
OY8EtRA4EI4wqe/JdR53mqMGFhVBgM7AhjkRvWsa7jeOIEC/vN3ApADJwb1Dl7G0
tw8OtX2LIEgOFw2Rtw0XLJkGVjKCAKsJJIcFxdN9WLjr+xRBkBwUX7S3Qbk1HjyV
XSMItMYLEQQZgWlwaz8+jXhMp6S0DWmwUjftl+bO89V+sIIYsfZDKc5xGCy08ZwB
S6n94IlCn/YIgg9aapUk5ZGgFsIH5jUkKTxtSe3HbVk8hgiCLhDkphN0fOvSIMhN
JyhbXRoEuekEuevSIMhNFyIIlpf/2F6CCIHwwUphPEDvNu8eYvsMJwirPYIAoh3A
HJki+m7qdBl0iuh2G75dUrveh4XknTF+f0AY78AeNfJ7jQgCWtP57mp0am+8Dztq
vA97zCLZ0eaw8T5s3vE+7CPhfVgN3z4FuevSIMhNJ8hdlwZBbrrNkeMO54o44I3e
SM3Xq8Wyepm0WOO3+XEMrHKVUlmX1Uol/mL/PH/vf6H1Omu+kG/kVTelOr/sXy5W
olyhUhzRP0DwVlK/67E817funE2hiamBoEkTmuaE2oSmsnvXyX7UsfR6Ol+mvD6t
uVB+7pHpKi1EXy7z+3TdQer2UiwLTRZ6YAUPJwvN83Ue48rrPETUhToPoQlOkUe6
iuKXYl+uyyA09+k8hOZBTQew0ITFC2COwAMLzXeRj9BsOyHwk5mQVyGGgCHo+Nal
QZCbTlC2ujQIctMJctelQZCbLo4hgA8sklmlEgugcqnMYU+FsvaGVeu1yENmvMVf
qbLsKlSr+n3+fKGYLymJVSk1ODyqXo1opeAaib7UK44hWI6r287kTHGJWYGY6Ie4
PNFiCPKyFWaAjxnL0TEjHyh2YCgcKDIwDe4DRV7zIzrh6AgpeZAV0mAkPFNpB4oP
IyNXGweK/GAclulD8u9P5C6Ny87Koeys3E/kfkqTtNIR3QbA7aIOFFGKT26lpIpq
geRzoPhhUk8906QcKM6YB4r3kepz9M5RbqxrUfohS60yvI7o/1CLXmHk4Z0B5KMH
IRcbXtyW4e1Oi4X9EYqFPSNN2JtIc6IdodiWxBQyrEMaHrAhwcxNHxJWF7CtEspA
g7vNPiRwaf4eueLM7j9zj2stxXd2EnynM5IOQNx/QDb+I/Pe/PHxbANgyt4G4Fa4
BckazPxUZ5/WwiFqr2dgGtxaGQkTF6L2VkbqppW3ICPX0ebm843a+2irRP2vtDJK
lytq72Ok+ux05DGvqIVkLZB+jYWUSEMFKylum/HFclxOhKg9itGPbbygbHVpEKRm
heHbp6CVUZcGQSt/7CFq74QK4wpReyfUcsc7CyhkqHK58iFqj9Tu6W4anKg9mF0A
1sM0rhAsgvGb3iRP4wpOK2mddRhXkd/biNo7oo0r2Kj4/WqzvQm0id6YMqL2Foyo
vRkjau/YKXHU3l4jak8YUXtjHlF73zOi9maMqL3HT4n9UYeNqL17jKi9mRC1pzGo
dVkhyN2noMGp20xfI7UBSHo4Tjd/4ForW3XetTZzTFuxWmuUENNWztfLiFSrFRt5
HdNWz5dVCFtNx7TVy7WooKaD3Ir5svaAFcs1/kLDfLHCv4rTKFli2h5d5eOzq0+M
F1iM+lQq7slSDZ0p1RV+dZyxTaqjulQ3L5Qi/yWy7jraSPvlnXSodcpK9Dr5/ztk
+qCk/7hMvyVVzBetMXu4Dq6OT/YKnUmx+jyXlFrE/wgU5zfM4P2DykPdC3UZ6F+i
20YxGBTH7O2nOGbvkG4Pifs6XY70Dv0JNYmXJ9Af+Pq4zkNN/pb+hJr8IikesB5p
h5pFySVOZ70ONUPQXg/ANLjPM/l+CkF7KyN1O898GBm52rbzTN+whftbJUruqPNM
lJpXZdeFPppc0vNMSBf0aQ/ae8BSqwxyHglqYZAXSRnkb891nnaaowa8XXK2oD10
BjbMiehd1XC/sXMO/fJuA5MCJAd3ry5jcW8fHLg0nXMKdt/Wo5FKwOK21L97qGiG
vG2oYMe0rZL+OqwkkBwS4ue6Dwl3fJu/TsE1Jqg9dBbbOO5B8UV7G5Rb3ZUkuxiw
l7oLEXsZgWlwqz4+iXhMp6SoDWmwUjfVtwUZudqLUX2faJWYqg+ldxk1LLHxnAFL
qfr+C6k+7RF7/9VSq0QpjwS1EKUlUqIUXq2k6uO2LB9DxF4XCHLTCTq+dWkQ5KYT
lK0uDYLcdILcdWkQ5KYLEXvLy39sMEGEQPhgpTAeoHeDdw+xgYbzg9UesQfRDmCO
TBH9fup0F3SKaNOAb5fTrtiTEK/nK48E9b8uDYLcdIKy1aVBkJtOkLsuDYLcdHG8
Hg53VbxcqVFoqMCNQlWFeqgjYB3CUcrrCI9ata5DQkqtqI9Co6SPf/OFUq2q4+VK
DR0eUmqUVLxcqToSxY48Sm8m9evly3N9y7bZFJiYGAiVNIFpTqdNYCqbd3VH68Ha
BTBHpsDEwWV3gdl2POAnMSGtQrQeQ9DxrUuDIDedoGx1aRDkphPkrkuDIDedEa1X
0xHGxZKSKvmRcoUD4eAiYzGlhJMRL1ctcMxxMV/Qci1fqOT1b5RJWl1YLatIvGK5
mvzFn+W4uu1AzhSXmBWIiX6IyxMtWq8sW4GWzxjrB2ZuohCq1w2YBvdJIi/4EZ1w
ZoSUPMEKaTASHqi0k8Ro4yNX2wzVwwbvDvn3y/Q0a5kmaaVf120A3BvqJBGl+ORW
SqQo0YHUy0ki06ScJM6YJ4kPkurTHqr3G85aXINFb2cgH48TtWhVJncgnzkngLeL
LdYD6IKZYaTpARNpjjX0y2YmJgqwDQlloMHC2Ydk7suRV5zZnVDucUFPIG8bF980
jKQXDUsJZOO/w4uWbQBM2dsA3IqrIlmDOzDVYwZtFkLeegamwa3dkDBxa3IqHaBO
iRrS4KRu2m0LMnIdbX4y35C332yVqP+VdkPpQ0YNC2A8Z0Av2o1pUrRbm58ML52h
z05PGPOKWkglbLpxavBhUvIMFayhuC00O5LjrWyQh5C3lfxWtiA1KwzfPgWtjLo0
CFr5Yw8hbyszBqqWLQYqhLydUMsdbyugkKHK5cqHkDdSW6e7aXBC3mB2AVgP07j6
EKnxmy4ZT+MKbnZpknQYV+pURjlFYFyNGiFvmzxC3o7okDe0H1uzKcoLmY6todhg
G45D3h45aW9UjvyDOvwNUyU2HG1zFJlg/u9YsxC1R/4JnQf/jw/HTp3DOvwNx9ln
6JA38DZzKpw6K9m4SoMgd5+CVkZdVghy9ylocOo2R2EERynhJjjNMx4skuwoS40E
a1TzYqsoFUoV/FcoS5EF51KpVkXMV7mEy+VH6sVS9ENu5Zr6v1RnH3y5wG6oUrne
UCFg5XqxjDenWhw8umpGYleJGBmwGJWozvI2SdXyDKmCzm65kYgukCoG524XSzF+
qay7kjbSK2WaiPhQmJaUb5DpnZL+Xpk+LNXGQ5GL7CvUHsZmnh+yxwQqh1Xi2aRU
Hf6/gOLXriC7UY50sS4DPVQl2qIdXtPaSGq8r9R5qMEJUnOGa07rT/CEQwLkIc/f
Sao/qD7ETiAP1YfzAXxC9eFUw8e9VpWtEILX/ZQyxLD1AEyD+4CSb6YQw7YyUrcD
StP9ZgLGke+L/J9qlSihow4oUWpelR0R+qxxSQ8oP02qT3sMGwRMslZZ2DwS1EKU
VUlZ2L+a6zy+NEcNeDvYbDFs6AxsmBPRu57hfmNXG/rl7QMmBUgO7iO6zHRVdQ4O
FH2JYUsOFc2Qtw0V7JjGUtL7xgfgySF9VJelDwl3fJ9i2JKD4ov2Nii3rqtJdvGz
sN11XQhgywhMg1vv8bnCYzol5WxIg5W66b00x5yv3vvtVomp91B6l1HD4hrPGbCU
eu8zpPq0B7Ah/iVZq+QojwS1EGc1UnL049Sp97gtC8cQwNYFgtx0go5vXRoEuekE
ZatLgyA3nSB3XRoEuelCANvy8h9bSxAhED5YKbZKe7d29xBbZzg5WO0BbBDtAObI
FNG/Rp2H/50iGhT2ADblpGk/ZUc55PFeIxyDjBCMI0Z+1AhgOzbUGTqB8gUt1yHL
xUlK9rvketTeCMcQjnCMoyEcQ8O3T0HuujQIctMJctelQZCbbjPdSepLscoldbxb
rKrfZMuPlIoc3oAjX51rcG2lUeZj3mKBf7Sogd97i8Ig8oVylX/vrVHQ0RTlSj7q
p1gcKSXiMZbl8pYdsykuMS0QKWni0pxMm7hUW92TpThSB9Hr6VyZRvQJjYrHONUQ
n+vpRl03SbZ4DPSHq+CTzwdxJeTBCg6eWVyeq/Noi8cbeYiuus5HhwakxCj+Z5GK
60Gkogzi8kadh7ic1HQAi0uoSgBzZIpLiNbu4rLtZGBp5CVk2DFH+NqMEb62yQhf
e9AhL/ca8pIc8vJIkJcavn0KctelQZCbTpC7Lg2C3HSb6Xb5F2eZ5ZoSWJVCTTu5
qnX+3Te4xFSugWDck9vix+LKQqXK0bbFYq2mxFWtVosoZMNqIxJX1epITUf7vpHU
txYuw8VtJ3GmsMScQEgshbBUAqcm8ztlerEWltfJ/N7omkS39F1Y4poQXBBmLCx3
6jzSiykWltfpMgjLvToPYXmLpgPSThzrshXatw4Xoy/IohC+1g2YBvc5Ii/5EZ1w
YoSUPL8KaTDSFdR+jsg3Pz7xKL4aGZlwjohHFsC28bu5p1Bt6KnWMkCTRel3dBsA
94Y6R0QpPtEDEu4cQUp4IPmcI/4eqYeeaVLOEWfMc0S86YY+OwPUUPq7zlpcg4Vv
Z/gajxO1aAWbj2OlosckF9tk5pwA3t61WBOgC2aGkaYJTKT51NAvm5mYYIZ1SMMD
NiT779CZQ8LaA7ZVQhlocC/ahwQue4/IS44L9zvytnEp5Roj6RPE3Qlk47/DJ5ht
AEzZ2wDc2rghWStTN/9fpKJDTF7PwDS4VTYSJi78DN3KSEmVbQIP/xZk5DraXH/v
TDyxyTJ+pj/XKlH/K5WN0uX6GbqjpPrsdO4xr6jFiPEewU2kooijWz0X6yhu2+W1
cZCHmLyV/Nq4IDUrDN8+Ba2MujQIWvljDzF5KzNIK+PvkoWYvBNqueONBRQyVLlc
+RCTR2rzdDcNTkzeUVLAepjGFb4+EeM3/UyLNK4ib7gRk7dgxOTlPWLyjho/Qzdj
/AzdXuNn6I4aP0M3puPwwM8Z+u0qXGtsXfq1bpDpceNn6O4wfoaO9E/PRV4x42fo
juiYPPC2EH6GTmNQ67JCkLtPQYNTt5n+Wv79KnV4PzZ6xrL18itttVq5VhZbRaFS
K9cLuEShmi83lG+sXMg3EMhWquTVz7JVaxVVUKro32mrVrS7rVjhb3ksFutV/p22
fMnyO22PrvYB2hUoBgz0Q4Hie3/XSXXD+3mirVIh1aTCuVQK/atk3bW0kfbJloeM
Nq+X99Y7ZToi6R+Q6ZNSyXyJbD9EZypQdhpBDrIChaJDv/h/K8XvncE3CKWHOihT
Pu68SrdFOyjWjaTGu4/UNaA0+eUSyFy8AAN+kBC1h0+0O0KqPyjKB3QeivKT+hOK
Eltk8IAFSTvVvFBebTv5nWqGGL4egGlwH2jy7RRi+FZG6nagafogTcBY841l+Hyr
RIkddaCJUvOq7LrQZ5NLeqD5B6T6tMfwPWypVRY5jwS1mA98MTpM2Htznced5qgB
b5ecLYYPnYENcyJ61zTcb+ycQ7+83cCkAMnB/TddZjq3OgcHLvsSw5ccKpohbxsq
2DGNq6S/DisJJIf0oC5LHxIo+hTDlxwUX7S3Qbm13UWS3YvIT9uFKL6MwDS4NR+f
RDymU1LShjRYqZvmS3Pl+Wq+P2yVmJoPpXcZNSyw8ZwBS6n5vkCqT3sU3xcttUqS
8khQi/mAsIEkhWkePQi5WPNxWxaPIYqvCwS56QQd37o0CHLTCcpWlwZBbjpB7ro0
CHLThSi+5eU/tpcgQiB8sFIYD6CsoE647d09xPYZTg9WexSfkq5qjkwR/ZvU6S7o
FNGm/d4up10/qrSb8KNKYy3ZPGpEohwz8gtGFJ9w/AzdUSMqZa+OSsGYaG3yxQ7d
3ohK2euISqF1ISpFwbdPQe66NAhy0wly16VBkJtucxQUgkg+HO2uiYI68vlyvlai
U/BPqZDXP/WGI2CVqxSq+oC3XuSgunKrXaFS1GX5fL1QLsG5jVC6MvdTrOpQusJI
WcWm/AIpU2LZWLDsnU2xiemBaEkTm+ak2sSmsnzXSfHzFCmanoU9okxFfVazQ35e
KtOYFo2vknn8CBEwQ7YAFfSHq+ATIg0PJkQoaMAKPKksNmF/I49xFXUeIgxiAXk+
hEYeaYzifRiO1FGGa0AEIg+xOaPpABabsHkBzJEpNvGNqN3FZtsZgZ/chMxayh+j
i1zHJ9nl5kKIfk6BIDedoGx1aRDkphPkrkuDIDddHP0MD1gktIqtaOJKqc4/5Far
aIlVaxSjoDnz5+CqHIJXqLV+PDMvpVRDCaxqudVNvRIJrHJNtlUy882kvrJxWS5v
O5czBSbmBYKiHwKz28/RKaHYPfzZFJhohydys86DlWfqPAQmXmdhgQnPF64J4VXX
5fh/l84jXUGxwIQtygLzRp2HwJzUdEDa+eMO2Qp88VFjoRqdNfKpYgeGwqkiA9Pg
PlXkRT+iE86PkJKnWSENRsJDhYcVeYBvfnziYfxt/Y8Z07eZEL+3mWpDT7KWaZJW
+pJuA+DeUKeKKMUnekBSYkWJDySfU8U/pmwxfV8m1Wdn1B5K/8hZi2uw+O2M6eNx
ohatUNbU+egxycWWmTkngLe3LdYF6IKZYaTpAhNpPjb0y8YmJphhHdLwgA3JHtNn
DglrD9hWCWWgwb1oH5J57IC84szuYnOPC/c78rZx8XPASPoIcXcC2fhvs/+zD4Ap
exuAWx8/X7JWpS7+QFbSIaqvZ2Aa3EobCRP3izmV4OlIKoqQBicllTY/TfjE478F
/8h1tLkCfaP6/qRVov5XShulFxkdsBDGcwb4KG20y+IK/FNSfXY6+5hX1GL8zyd1
JILviYtu9VyspbhtxhfPcTmxgqP6AI7qAziqD+CoPiBE9TEGtS4Nglb+2ENU3wkV
5hWi+k6o5Y63FlDIUOVy5UNUH6nt0900OFF9MLsArIdpXOFkCONHWY/GletNKtMr
bxpXsFHHPKL6jhlRfYeNqL4FI6qP1sdRfTM6qu8GmbboKD2037uOUq+F9raovgg6
kg84YuZ1VB8QovoYg1qXFYLcfQoanLrOqL6WByQKIOtz2FuxWGpUxVZRLsEdtiGX
qxQaBbTOj5TL9SjGrVDXMW7VSrkWFdTqOugtX9HfiVkslvUrB5K8poPeKpKwM+it
M6pvlQ3QrkD7EdXH757hBQooUN7PQz6fSg2pcC6TQn9M1l1PG6kp76XbWgetvUT1
me+ksdsoqUBxbfwPzcDvoSGsnKP6LtNloB/TbdHueoqj+nA4iutCad6m20PmHo+o
vosll1D+fueaIa6vB2Aa3EeafEOFuL6Vka6g9iNNE3hgTT+kCZiGvtENf94qUYJH
HWmi1Lwquy/06eSSHmk+QqpPe1zfX1hqlU3OI0EtZudiUjb5e3OdB57mqAFvt5wt
rg+dgQ1zInrXNdxv7KBDv7zhwKQAycHhXXEuYwdX5+DAZV/i+pJDRTPkbUMFO6Z5
lfTZYSWB5JDwVZndh9Ths1NwjQl6D53Z3h9KDoov2tug3PruEskuNoh++i5E9mUE
psGt+/g04jGdkrI2pMFK3XTfFmTkai9G9/2PVomp+1B6l1HDIhvPGbCUuu8vSfVp
j+zDZiFZq2Qpj4Tl5iWkZOnnqFP3cVsWkCGyrwsEuekEHd+6NAhy0wnKVpcGQW46
Qe66NAhy04XIvuXlP7aYIEIgfLBSGA/Qu8W7h9hC49OV1RzZB9EOYI5MEY2vowev
KHOLaNOCb5fT/YpQQf5xx+/zHTYiVPJGhMojjgiVw0aESt4RofJIiFDR8O1TkLsu
DYLcdILcdWkQ5KbbHLntcKqI490oRKSA2I/oDLdUrXEsXLneiqkr6V+7qzaKrd/P
a+igkkIhjhGplwo6pq5cLOrz4XJFxYgUioVkiMryXN+ybzYFJiYGQiVNYJrTaROY
yubtDFFR5zQN+blbpiu1UHy5zO/TdQep3yEqyEN44QgaeYxtt84jQajyDuzlugwC
c5/OQ2Ae1HQAC0xYuwDmyBSYv0c+ArPtfGBpJCakWC8xfdF3rFos4ei6hsTc5JCY
DwaJqeHbpyB3XRoEuekEuevSIMhNt1luT9WOC/4vJbEqdQ6qq3DsMZxkKlfTcsoM
qqs0OAi5waIrXyg3SupX8qolloDVupJ7xXJlJPGDpstxdduJnCkuMSsQE0shLpXI
iSP6lL15vcyPR9ckurXv4hLXhOiq63L8v0vnkXDwAT5wPXjsWFyO6zzE5a2aDkg7
eRyl9oi+UjFE9HkC0+A+TeRFP6ITzo2QkqdYIQ1GwkOVdpr4R8jI1TYj+jbK9OPc
RhodOt1apkla6VHdBsC9oU4TUYpP9ICkxIoSH0i9nCYyTcpp4ox5mogXH9BnZ8we
SnEKbq/FNVj8dkb08ThRG12T3BF95pwA3n62WBegC2aGkaYLTKR519Avm5r8hoht
SCgDDRbOPiRzb4684szuiXKPCzcH8rZx8U3DSLrSsJRANv47XGnZBsCUvQ3Arbx2
kkf4G2u0EP7WMzANbg2HhIkLP2q3MlI3DbcFGbmONn+Zb/jb/2yVqP+VhkPpcv2o
3ddI9dnpEWNeUYur7yR1evAwKZmGCtZS3LbLG9ogX43hb8iHH7UT5O5T0MqoS4Og
lT/2EP52QsVDhfC3E2q5460FFDJUuVz5EP5Gavt0Nw1O+BvMLgDrYRpXf0Bq/KZr
xtO4cr1uBIfI6AoOfwP/FH7Ujtx9CloZdVkhyN2noMGp6wx/a7kLliQ6rFytFsVW
USk1ymXEfJUalaqKDqtUGlEwWDFfUsFgtXq9EkWHNXRBsVhvRYdVdXRYUXLB0WGF
miU6rDP8bZUN0K5AQ/jbYIW/7SKP8LfWuWYIf+sBmAb3kSbfUCH8bWWkbkeaptPO
BExD3xCAr7dKlOBRR5ooNa/K7gt9OrmkR5o41UOf9vC3b1hqlU3OI0EteNtFyia/
K9d54GmOGvB2y9nC39AZ2DAnonddw/3GDjr0yxsOTAqQHNwf6jLTwdU5OHDZl/C3
5FDRDHnbUMGOaV4lfXZYSSA5pC/osvQhdfjsFFxjgt5DZ7aXbZKD4ov2Nii3vttN
HuFvLX0Xwt8yAtPg1n18GgFPMVJS1oY0WKmb7ktz5/nqPpwcMXC7KN2H0ruMGhbZ
eM6ApdR9x0j1aQ9/+1tLrZKlPBLUgrfdpGQpLIToQcjFuo/bsoAM4W9dIMhNJ+j4
1qVBkJtOULa6NAhy0wly16VBkJsuhL8tL/+xxQQRAuGDlcJ4AGUHdcJt8e4httD4
dGU1h78dIwXMkSmicWoCXnEtt4g2Lfh2Od2vYA7kQ/gb0I+6NAhy0wnKVpcGQW46
Qe66NAhy08XhbzjeVeEUxYIOfyjXWj8kV2lw0Fm5HAWQ5Ufq+Youq+igMklbKsQ/
kVRo6J9IqpRqOlCtUlPBawg/q7SHvy3P9S37ZlNgYmIgANIEpjmdNoGpbN7OeA51
TrM6wt/+Vv+POTIF5pfJR2C2nQ8sjcSEFOsl/A2DOuqQmAvhJ+1SIMhNJyhbXRoE
uekEuevSIMhNF/+kHfxfkcQqlcr8E3CNopZdcJJpOVVTtUYAWq1e5njdYk2LOCmw
ivmaEli1alV3U8+r3+iUzZICc1kubzuTMwUm5gWCYikEphI6q/cn7fZQewBcNR8C
4DyBaXCfJ/KiH9EJJ0dIyXOskAYj4aFKO0+Mvp1ErjbOE/GgAptlqg1tprcNPcla
pkla6e90GwD3hjpPRCk+0QOSEitKfCD5nCd+h9RjzzQp54kz5nnit0j12RnihtJv
O2txDRa/nQFwPE7UohXELF4oQD56THKxZWbOCeDtaYt1AbpgZhi4jG2yTBkNpPnX
0C8bm5hghnVIwwM2JPtP2plDwtoDtlVCGWhwL9qHZB44IK84s7vX3OOC+kPeNi5+
DhhJ/yDuTiAb/232f/YBMGVvA3Dr4xeQR0wfK+kQ09czMA1upY2EiQsxfSsjdVPa
W5CR6wilzU8oXhd/p/x7TCoyWxmDn+rvtkrU/0ppoxQxfdyKhTCeM8BHaaNdFifg
35Pqs9PNx7yiFtLnBaSORP6clExDBWspbtvltXOQU4jpG2rX1ivptXNBalYYvn0K
Whl1aRC08sceYvpOqCCvENN3Qi13vLWAQoYqlysfYvpIGTB30+DE9MHsArAepnH1
Z6TGb/qbPI0r1ztU8PKMhpg+9KLRm8KP4atkBbnrskKQu09BK6MuKwS5+xQ0OHWd
MX0tD8iShLyVqpUaQt4qpXIVgWyFfK2hf/GtWq9GIW+Foopwq+cb7T8BVyoXdKBb
qcw+t1KhWlAhb9FvyHWGvHXG9K2yAdoVaIjpG6yYvkvJI6avda4ZYvp6AKbBfaTJ
N1SI6VsZqduRpumHNAHT0Deu4futEiV41JEmSs2rsvtCn04u6ZHmD0j1aY/pwxlh
slbZ5DwS1IJf7Clgk78v13ngaY4a8HbL2WL60BnYMCeid13D/cYOOvTLGw5MCpAc
3CO6zHRwdQ4OXPYlpi85VDRD3jZUsGOaV0mfHVYSSA7pL3RZ+pA6fHYKrjFB76Ez
2/tDyUHxRXsblFvfvZA8Yvpa+i7E9GUEpsGt+/g04jGdkrI2pMFK3XSf6c4zkdRz
tjJ+uHF6xYh1H0rvMmpYZOM5A5ZS9/0vUn3aY/r+wVKrZCmPBLUQUS8kJUvxtcNJ
3cdtWUCGmL4uEOSmE3R869IgyE0nKFtdGgS56QS569IgyE0XYvqWl//YYoIIgfDB
SmE8QO8W7x5iC41PV1ZzTB9EO4A5MkU0NnHgFddyi2jTgm+X0/2KUEE+xPQB/ahL
gyA3naBsdWkQ5KYT5K5LgyA3nRHTVyjqmLpaVcfFlRp5HTWHM2CVq1T4R+NqVY6U
K9fyOlcocOxdPl8vFnRMXbnCMSTlelX9pFyhMFJNxPQty/Ut+2ZTYGJiIFTSBKY5
nTaBqWzezhAVCJbVEtMHaxfAHJkCE0fm3QVm2/nA0khMSLEQ0wf0oy4Ngtx0grLV
pUGQm06Quy4Ngtx0Rkwf/whnucwxcLViXUsiOMl0Tv9unBFUV4dzTQms1q9t5vON
fCmvg+oaeS3k6kUVuFxsNEaKiZi+5bi87UzOFJghpi97TN9lshVoW18ddmDmJgrx
fN2AaXCfJfKCH9EJp0ZIyTOskAYj4YHCg4p8EngQDyAjV9v8QTs8rP+XvSsBsKn6
/+fN8mbmzeINSmV79n3MvlTy+ElKlgghsk1FdpIURqW0UJJCkaI9W1GKSqs/UYpK
WlBCi1ISlfjfzz33vHveeect82bmmXHuhzvnnnO+95z7Ofds75z7/d71NjtJjpKH
GZd4jt8MGQB1g64lIhQuUsBBuxTadeAozloiuybAWuJofi3xd0LT9NXYQ+gffmOR
B+t6ffX5GE/EQgqzKLxMgHO9mdjMWRlfJkDIu2zmOIAk2M0wBBoHeATaW0O6bKKJ
ggJklBCGa/Dg5JT4X+Y4p3cm34fyzwuVA+cyXqzSMIgbaXiUQHj37zVRDp8Au7J4
BPwPXJdqt5ZJgmyaYTSzFN+KDRSD/9ENBwrOUnyrGEew0a0xTrTnKNspC/Vjdkc8
IdRPRzeEnq6P2f1JaJq+e2HsXhGLxVz8lsa6Ab7DIo5QTDbIu9m43FJ8q8jvZrsI
LRWGUNN0kYoRFwguUvG5W4pvSmlCWYpvSj1u82cFBmQM5dqTtxTfCP3pNJuUH8U3
TLsAPA9+cvUlofz5TZkQJ1dY4tSmJD6TK2yFEE7xzc0pvjlDUHxbzCm+deUU39yc
4ltRgqn4lm4ovukb/9FFHhlXivdWEQ/IXEMw8TMV3zpwim+LE8xtHTen+DaaU3xz
WYpvBsprXLhwEf9pukj5iUvV3xP8hAjbBElloBOWm5GBz7xl5ORnZSGDnOw8uuGU
k5uRriuApRsKYPk5mdk0QP8eXHpaZkGGsRGVWZDFvveWU5BlaIRlpedKNMI+O3Op
yQdNUAVKMmjS1T6nNvicpw1SdTwbTYQ01Tr9HG2Qaad19Jdrcd1JChmoSY4xNtiA
iVp9uls7FmjXL9WO5drA8o5U2Y1fYWR7KhiU2KBZh9DBEP6mxHw1C707BjrEtTPC
2MYZZCHXnZjKbgMJzQMD5RhDBv6JxFR2w89uuBgcFxCaHgbHpcY5BsflhovB8R1C
7wGPItA65mXaXbYgoaxjWopuxQCKwf8SJqtMlqJbxTiCLWHyG3Q8MBUM9WX/vzwh
tNOhS5gI5XNlWxXGamSZLmEeIzRNuaLbcUksnYMzJohFV4fJK+bgj9l8Fzh51kDI
W3AyRTckhtvgC6L44wxL19yMQ7rsBwYKBRDJQXMdYfxmli853GWpKLqJVCGGcxlV
3A4/nRL35/AkAZHS10ZYYEqo8aWk6CaSYpkWj5T/sa6jdrt4CzD4WGcpuYUJFIP/
cY+tPOw0DrGftY7ydQQb9wJt3YU67v3tCeHHPYTex8Ww7hrtDCjLce8fQtOUK7n9
K4ml/Shjglj0ox0J7Uf3EN9xj8myztFScgsCF/F/nYtENi4QXMT/dS4SXlwguIj/
61zEf1wguIj/6ywlt9N7/+ZsCV0IOh88KfABij/bbUfY7AwrB2e6khu6dgBlxHfR
+H4z7pXfHvDtovnZu3c/XVoqGzgvjpKbv34dMkWWykYAuIj/61wkvLhAcBH/17mI
/7hAcBH/13EqG+mGzkQmPiGnr91mZ+UYq7hY+6VnuVkF7ItI6VmG6lhOdhZTMsti
6mTpGVnaJXF6dIbnu3G5BfpZTn5aZgZV2cAUAta6Tkv2kl/MfHeJYkGXEqi75AtT
1l3SGa+vxgZdoTFV3Fj3WZYaGzhH14UftzgHt/8Z5zhYl4r80KUiLLDGBu0uMdcF
UEZ8d4md3eDdpdfKQNn0l+jDiqPihv5yg5/+cjTXXzr99Jcrrf7SQKhpuoj/uEBw
Ef/XuYj/uEBwEf/Xpeq7Lfi9hV0vvcPKSM8wFGvz8vJY55STafQ5BZlUYYzXMcti
PVdGdhb7blxGdoa+VYeOLceIzs/NoPppOZlMw83sLiOfu2wtju8uUSroJsqiu6Rd
jqngRrvLXtr5QD1PQm4o9e4SeaLryjfC4W9rnOPAsgfrLmGUknWXA41zdJc3GNcB
gdYcLyfeCm7ZloJbKEAx+F9HZA98sXFgxQiHuH5lHeXjQIMKtI6YgRPtafPriDhr
pP2d6NmG8Q1DBWHHCY8UrRt0HRGhcBlol0K7DhzFWUdk1wRYRxzNryOeJDRNXxU2
hKKZy2ORB+t6fRXcGE89DQ0oW38KbnyZACHvrpnjAJJgN8MQaBzgEWhPDemyaSYK
CpBRQhiuwYOTU+J/leOc3pl8/8k/r5IouLEeO7z795omh0+AXVk8Av4Hrk4kBAU3
jGaWgluxgWLwP7rhQMFZCm4V4wg2ujXGifYcZbtkjwrtVQzztGhODKd0dMPp6VJw
s9lomr77YCwrOLgjrD5g1eAHQvszRLARisliMReHn3ewcbml4FaR38F2EVoqDKGm
6SIVIy4QXKTic7cU3CqmxpO+jYiEi6fxZCm4KfW4zZ8VxGb+rLAU3OhPp9mk/Ci4
2YwHAYefXO0jlD+/JcMeWpDJFXaESBkquEG+a7RTP3dpx55oYk7Y4k0Ft20xAzwT
s5WxdGKGaxfbA+eF+59nKMTh/BzjBSV9o5xTcNtmnOP3VL6h4Ib0VyZiU6ciT64C
wUX8p+kiFSMuXLiI/zRdpPzEpeqT/PeIsE0QqhaY3rMjLKD+V0ZONvS/snLSCzAE
Z+bmpuXQnaOc3Lws6HvlpCPL9LT87Cxd/4v5Mz3WaTPz0pn6V0ZGnqH+lZmViXen
PHfx2RnFRj40gh1QkqGRrun5V2NLIBdp3Xl7La4TSSF9taFlGCczTrvydu2Yo12/
UDue0YaPdfpW2Q5SempsCMdxkRGG6zFkQhZyGH5SCOXbl9DhD8PhMOM65AkFEbi4
p9uNcwyB+DGO9DAEQgsK5xgCnzFcDIHrSGjbbJ1JCGps+mqlpcZWDKAY/C9Usspk
qbFVjCPYQmUGTrSnLVuoDPV1/mhODNWFLlQilM+VbUgYa45lulAZY6NpytXYYiWx
dKbNmMBBbe9M6Ex7oc13GZNnDYS80SZTY0NiuA0+zeKPMyxdc8sN6bKfESgUQCS3
3wjjt6x8yeEuS0WNTaQKMZzLqOJ2+EmTuAuHJwmIlA4YYYEpocaXkhqbSIplWjxS
/se6LiQENTZ9rLPU2MIEisH/uIcDBbfTOMR+1jrK1xFs3Au0QRfquGfnxMxxD6H3
mRGe7hrtDCjLcQ8bg0hTrsYWL4ml/ShjAgf324XQfhR7ZOK4x2RZ52ipsQWBi/i/
zkUiGxcILuL/OhcJLy4QXMT/dS7iPy4QXMT/dZYa2+m9f3O2hC4EnQ+eFPgAxZ/t
tiNsdoaVgzNdjY298wGH76J/JL6bAL5dND979+6n6WbNhg70CgqEoz8ewKllEE4V
YzF37ubU2Pb4UWMrstQyDIQaFwgu4v86FwkvLhBcxP91LuI/LhBcxP91plpGTjqJ
wlJtVm6BoTKWnc0WcrHkS89yc7MN1Ye8gnwjLCc3w/Ppn1yPGllefo6hRpbJPiWU
U5CnrwdnQZmCrmRP03KefJpyl/xe5jtLFAo6lECdJV+Uss6S/tC1a50RXYZ2kPra
kWaszxRfKwPpIRe4bHUQOeEct4JlZ9ZZ1jfOIYvGjXN0XPnGub5kYJzjwCy+eFoZ
tLPETBeAw3eWP5FQOkuvdYGy6S3Rg+3xo8Q2mustnVxvudJPbzmA6y2Jn94S+6lW
bwmEmqaL+I8LBBfxf52L+I8LBBfxf10quYnQ/RZPf5XOVMHysj3fSfOo1RYYnzrj
tcgyPFpkOTlGz5SemVFgaJHl5dIvq0EXjfZ6efh6pZ/OMnKZy9bh+M4SZYJOoiw6
S9rh5GnnbbSjo9FZ9tTOB+h5YjestDtL5ImOK88Ih7+NcY6jIzE7y55GGDrLAcY5
OsthxnVAoPXGrsRbhS3HUmELBSgG/2uI7IEvNg6sFuEQ166so3wcmH0EWkOcgBPt
aWMN0XjU+vPdpP09zxYjDTMu8RwJXIuCHF1DRChcpICDdimmvzhriOyaAGuIo/k1
xEQbTdNXSQ2hSX5jkQfren1V2BhPOJDqSvyrsPFlAoS8s2aOA0iC3QwDspEVFt8/
A4H205Aum2SioAAZJYTxm0++lPhf5DinAvK9J/+8SqLChkcJhHf/Pptn4RFgVxaP
gP+B6woSggobRjNLha3YQDH4H91woODybPTAApjYo1pH+TnE0S2Fc8UdMtY68drW
/drfPaSqNIyBtehkrlnjlI5uCMXOEpNiHTDaGVCc0Y1dE2B089ohw2vQSNN3D4zd
q37fhF6PNYPDhPZniGAjFJMN8pY1Li9LFTaAqbABTIUNYCpsAFNhA5gKGyBTYQOY
ChvAVNgApsIGMBU2gKmwAUyFDbBU2BjKa1wguEjF526psFVMnaYwP9plqbAp9bjN
nxUYkDGUa46lwkboT6fZpPyosNF5EX0e/OTqN0L58xsyIU6u8PuClKEKG8C+0Qa4
jW+0AewbbQD7RhvAvtEGuFK8t4l4MJm1xjfaALfxjTbgAUNtDUg3vtEGXG+osAFO
6xttBsprXLhwEf9pukj5iUvV1Y62EWGbIFSlr+J8yCwvMyvH1dyVmZ5dkIMMtL/6
dlN2RlaG/tmyjALjO2b5BZk0IJcGZHtUv7JzcwybitlZOTlU9Su7IFNX/fL5RNuZ
ykw+ZIIpUJIhk671+Vdtk32hzVzQvUmrTTO0Y752/RLtWKYNK2+T8vSFNtwr/Nhu
xf3gmGG4GBrnE5oehsYlxjmGxmWGi6HxbULvAU8i0CpmNxKCapu+immpthUDKAb/
C5isMlmqbRXjEBcweYjbczwwEQz1FX8nJ4bqQhcwEcrnyjYqjLXIMl3ATLXRNOWq
bZUlsXQGzpjAQZfWjdAZ+Eyb7/ImzxoIeQNOptqGxHAbfJrFH2dYuuZWHNJlPy9Q
KIBI7ncjjN/K8iWHuywV1TaRKsRwLqOK2+EnU+LuHJ4kIFL6wwgLTMlnd47CHyeM
eUhM9kqNSIplWjxS/se67iQE1TZ9rLNU28IEisH/uMfWHXYah9jPWkf5OoKNe/zG
HQ9xjJOFsYZdhRMzxz2E3mdGeLprtDOgLMe9qjaaply1DUYbxVjajzImcNCPYoqP
fvQv4jvuMVnWOVqqbUHgIv6vc5HIxgWCi/i/zkXCiwsEF/F/nYv4jwsEF/F/naXa
dnrv35wtoQtB54MnBT5A8We77QibndF3Ks5s1TZ07QAcvov+k/huDvh20fzs3buf
Lq0vDuHc+kIbUBpxgeAi/q9zkfDiAsFF/F/nIv7jAsFF/F/HfaEtowBrwelpmens
c2hZ2XlMzywji63sFrCwvPQ8QxEiOzPbCMvIyPRol6Vn5lONiez0LOMjQtkacJaL
LwFRdQ1MIfRPDp2O7CW/mPnuEsWCLiVQd8kXpqy7pDNe308O0RWaM+MLbZjrAnD4
7vIoCaW79FoZKJv+En2Y9YU2oDTiAsFF/F/nIuHFBYKL+L/ORfzHBYKL+L+O+0Jb
Ri7tsLINNTBdc8zoiLA1Rs8K8qiqGa9glpeTa/RX6Xmeb6Slp2fS/io/h32YMr+A
7qJl5OWmGdptZncZ+dxla3F8d4lSQTdRFt0l7XKKrwtcku4SeaLryjfC4W9rnOPA
skfxdIH9rzleSbzV23It9bZQgGLwv47IHvhi48CKEQ5x/co6yseBBhVoHRG2XdGz
YB2RNnoafkV0PHkyOkEaZlziOc7mWhTqBl1HRChc1rRZSqhQOIqzjsiuCbCOOJpf
R8RbbkjTV4ENoef6jUUerOv1VW9jPOFACuz8qbfxZQKEvLtmjgNIgt0MQ6BxgEeg
PTWky6aZKChARglhuAYPTk6J/1WOcyog33/yz6sk6m14lEB49++zgRYeAXZl8Qj4
H7h6kBDU2zCaWeptxQaKwf/ohgMFZ32hrWIcwUa3xjjRnqNslyzUL7Sdx4nhlI5u
CD1dX2irbqNp+u6DsXuFk0LoW+NYNfiX0P4MEWyEYrJB3sDG5WWp3gYdQesLbQwu
El5cILgILRWGUNN0kYoRFwguUvG5W+ptFVPfKTM8fSdLvU2px23+rMCAjKFccyz1
NkJ/Os0m5Ue9DdMuAA4/ufqHUP78lkyIkyvsCJEyVG+DfHG+0Ib72RlVpJ+jqAYk
B1Zvg/wM7gtt8cYLSvpGDveFtpXcF9oaG+ptuLcHrC+0GSivceHCRfyn6SLlJy5V
3x59hwjbBKEqgYX2TbPsrJw8V3NXRkZWQS6Szisw1L/yMnKh7VWQidD0tIL0TF37
K19XEoOiV7qxr5SdkW/s1mflZxpfNMvOycrDm1Pc99nOHC7yYRHcgJIMi3Q9z78K
m/h1Nie5gVu0HaP5p2nHbO36R7XjKW3oeE3fJttBSk+FDeE4Qv06G/LAUIitMdwr
/GMMF/c0zThHn44hFelh+HvUOMfw95ThYvh7jYS2xdaThKDCpq9UWipsxQCKwf8i
JatMlgpbxTiCLVLyW3A8MEEK9VX+mpwYqgtdpEQonyvbjDDWG8t0kbKWjaYpV2Gr
LYmls2zGBA66uJ6EzrIftPkuYfKsgZA32WQqbEgMt8GnWfxxhqVrbrchXfYTAoUC
iOROGGH8dpUvOdxlqaiwiVQhhnMZVdwOP2ESd+DwJAGR0n9GWGBKqPGlpMImkmKZ
Fo+U/7GuFwlBhU0f6ywVtjCBYvA/7rG1hZ3GIfaz1lG+jmDjXqDNuVDHPRcnZo57
CL3PjPB012hnQFmOe3VsNE25CltdSSztRxkTOOjm8PYb+lGbzXfcY7Ksc7RU2ILA
Rfxf5yKRjQsEF/F/nYuEFxcILuL/OhfxHxcILuL/OkuF7fTevzlbctnM2RL4AMWf
7bYjbHaGlYMzXYUNXTsAh++iMXfDvfIbAChfwOyi+dm7dz9NN2pK/r0hnO/xo8JW
ZKlkGAg1LhBcxP91LhJeXCC4iP/rXMR/XCC4iP/rTJWMgky6vJuRnWvoMGQV5Bgf
+sGSLz3L0U7pWV5+NlMhyzO/j0Y/gAaliKysLEOFLNuTjPFJtey8tKxcuo49jdAP
Dp2O3CW/l102s7NEoaBDCdRZ8kUp6yzpD13fDw7R9Znia2QgPeQCl60OIiec41YC
fXAI5+i48o1zfcnAOMeBWXzxNDJoZ4mZLgCH7ywRELyz9FoXKJveEj2Y9XU2oDTi
AsFF/F/nIuHFBYKL+L/ORfzHBYKL+L/O/DpbvmHXMacgy+ib8tNZP4QNMeMsL8NH
gyyfRWZ4vq2WnqF1XUyDrMDowwrSs/WUM7Ky0zK8O8vTkLlsHc5lMztLlAk6ibLo
LGmHc+Z+ne0q4q2+lmepr4UCFIP/NUT2wBcbB1aLcIhrV9ZRPg7MPgKtIfbHifa0
sYbIFtXRcM+zxZIbbHZpmHGJ56jHtSjI0zVEhMJFCA7apdCuA0dx1hDZNQHWEEfz
a4gNbDRNXwU1hDb0G4s8WNfrq77GeMKBFH4e+1Nf48sECHlnzRwHkAS7GYZA4wCP
QPtpSJdNMlFQgIwSwvjNJ19KuMviq6+JvEqivoZHCYR3/z6bZ+ERYFcWj4D/gas3
CUF9DaOZpb5WbKAY/I9uOPT+ykaP64lvj2od5ecINro1xon2HGU7ZPcL7VUMYy26
ESeGUzq6IfRVM8LTAaOdAcUZ3dg1AUY3rx0y1F+k6bsHxu4VDlLuTeiaARTtxBGK
yQZ5wxqXW+prFfkNaxehpcIQapouUjHiAsFFKj53S32tYuozhfm5Lkt9TanHbf6s
wICMoVxzLPU1Qn86zSblR32N/WyAw0+u7DbKn9+QCXFyhZ+rpJyqr0FmQLK3nUMe
TP4BTn3NyamvuTj1tQ2c+lo6p7622FJfM1Be48KFi/hP00XKT1wq2aj9fZcI2wSl
rPKVmV8Ala+sjHRduSsjPYsaSszKyczSdb4yqI5Xfl5Bnu43dL5yMvOMXfacdLaB
n52bZ+h85WTnZwj6a2cQGfnACHJASQZGuqJXPAU2c/1grOa/TTse1K5/TDue1gaP
1/WNsh2kfCiwQQZ+vKYFF/ek/1QmdAB8kND0MAA+ZpzrA6DhYgDEa3qhbLL1ISEo
sOlrlZYCWzGAYvC/TMkqk6XAVjGOYMuU/CYcD0yRQn2RvyknhupClykRyufKtiOM
FccyXaZsZqNpyhXYmkti6TybMYGDfPsQOs+eZfNdxORZAyFvs8kU2JAYboNPs/jj
DEvX3HBDuuxHBAoFEMnFG8XBb1j5ksNdlooCm0gVYjiXUcXt8FMmcQ8OTxIQKSWE
RAk1vpQU2ERSLNPikfI/1vUlISiw6WOdpcAWJlAM/sc9trqw0zjEftY6ytcRbNwL
tD0X6rjXghMzxz2E3mdGeLprtDOgLMe9NBtNU67A1lISS/tRxgQO8sW0Hv0oPkEt
jntMlnWOlgJbELiI/+tcJLJxgeAi/q9zkfDiAsFF/F/nIv7jAsFF/F9nKbCd3vs3
Z0voQtD54EmBD1D82W47wmZnWDk40xXY0LUDcPguOtHmuwXg20Xzs3fvftqfSgb6
3QGE9tN638ypYazkzq1vsLlI6ccFgov4v85FwosLBBfxf52L+I8LBBfxf535DbaC
DKoVkZ6ZmW58vSwzt8BYycWar7GSm8UUwvLSCwwdiKwctuKbkUWVxKAXkZ2TTpPJ
ysw39Cyy8nN1BYrsPE2SrmRjCoGPCp2W7CW/mPnuEsWCLiVQd8kXpqy7pD917VpX
VTrfYEN6yAUu6y5TCe3ucCvVjXN0l9hpxTlkWxrn6LpK+xtsmOsCcPjuMskWSnfp
tTIQWn+JvmqApcJmwEUiGxcILuL/OhcJLy4QXMT/dS7iPy4QXMT/daYKW4GhRZad
mWMoheXlZ+gfLaNbYvSsII9ac+S1yLILjE5K6648GrfZmdmGFlkm+wZlfl6eoUWW
l1bgrcJ2GjKXrcTxnaWlwhaOClvlIoRFGd1gRovBhcOHE7p+eL52t7MNSRRyiuEa
1yoNFANbP6xC0rW/jez9ElsmJzujjAo5nWSStlpBs7EnXivkIVp1s+mVgMQs8myV
IhlcM9NYx7fR9So94oXngQFuw2vGEXO9iIXjUbGwIVrumVwz2OBmF+EPn1JV/Q6Z
5Nl6lYzy3BOACsLOFxOMhbTKmHfuD/yVMszWS4ZWSoqzPCE4UFLV9De9vVHfTd3D
ranr4vzx+hJfcxvu7YqoGqSmkcK451a3PvHrOuMKdiUhW7cApj9JG3jhttBT6BZV
m7ik99Db7d9PU0jUy6cOqUvqkaf0TgbNPBDE8hEBGTOlJO75ihCvFAGZ0runZUVs
dsXwHGlOaBfHZILhWa2cveuCDKGlS7tkiuDpQnqZ25sD3NDy4lkHzyv0dOkQQxE8
XUiLHCAfWl58ysHzCj1dfigMni6keQ6MR2h58QieFxBauiWrS+wILa/yWZdwhP7M
y2ddYrKh5cUjeF5AaOmWrC5BNvRnXj7rEmRDf+blqS41KLqTYEZBw8yZx+71Cyb2
zB6r++ncg7Km5Z9u6LUB7BrTjfLkS2dhgYDcGW7SGeJ1uN/1t8opkJ6A1iz2hM6C
rxON9PrVVpun2vSyon6Hzdv/qeBfEOXtPxA9ndAZL/WviPH23xTr7W9tZ/7p3J1L
4LnzO40yustwZxjuMv19fcxe0pCcDPRppLfRV0rIH/Qlev2cPgTI0N0ECvZLCUCc
/0rEJH3j3W3wN3ilAkKTCq1K8yj+FQ2M6s3eWmIwJ7VFBNUbr9zw1TuTq95sUm6C
VW+bfi+BEVb19sT6Vu8g1csTa1WvYleW4l/BqldNIdyqXlb18kHxr2DVq5vnZtiP
+pt/bJgR/+LlrRFGf5T7Ds4L5gObdBkeWKoJFb7VCwhSSYozxBmSPvCuJKwganMS
gPdaxcqY4rUzVhChFEdYBVH6rYUVhEv3mVC2IOroPhO93T10rPHTNAIXhNnzBkdY
BVGcpiEWAIO8IMRsS1Yjyrwgyq5G1NN9JhQsiHP0n6W4HDSBuvpbQMbP9FNwKaEH
2tTz7NWY4OPrGDtIhG68GHAVQUnYQZrFbnc0Szng7BJ7zBGX8q6TbhZU1i45TO4w
CHxFFhC644N7RQhcpC8eh3X5sgYrNeanDJ1e4VXJRK+XVUXIx3LGQwaXm5ZZAmlv
vzRpWEKGc5h9RFL7hGRnN3uPpP4JDZzR2rhd/DLDFk3Zgy8boHHRAwQ1DCOHTXfj
6J1rt/SGZG7DNim+zKx+f+WTP7ZOioml20VSPFT1Xq2cHFqK07Uf8kO0kBrRehPw
rCXEE+OFXS808TS6x0iGFo0nSMsTJ0VeLGjugTYJPGJmRvB5EhSApMQ4XIlrWMaY
oKJxgQc/rWUQ5RmMaLji+SmtsHTXEDPCN7iJPul1w92AhkxdOhGm59Q184wijd3p
ehF+E3WcZOhn04kjKpymINy5F8ym8HPCuMRKyRnOSo5HEn9OSnYeS5iaGJ1cEZtC
tNEMvJvCOSc8l3mwvvbOEY1u3daa+g4LTWHx4qVebu7TF+hNIboUmoInl9JqCv5a
cCSaglZA4vkprbA8TYGFlbQp3GbvGUWbQtOYC2PKqinEayPpj5XoSJrspCNpspOO
pBWnKdC5hOnHnbA7RPk21XlcEUVnI6z2mPXK7Q6nfBlnGVj5RpFD8YucwxyzUlMT
3nG2dwxLbZKwy5nm6JZKSFY0Ld+YxqGXb1Z0jPm+QplBLF9aDwFagjxYCfCzGRZX
lbTUGW4htE5vIPg4K3hmGxLNivBGIF4usGEtBgI6musrM1ddOXT88MIWxEWQD70H
m750lED2pNF5AFoz3kJKM+4sRuus7Lo2/QjtGKkdzcJ6uriSpu8Ls/UUaPPQrvYM
Zz9tHtpcazmYh8KNOuNaT7fT0npmx+x1TIu917kmJjaxX+x1zq0xNRMvju2C3slm
lO+AYpSvjQzAC1j3OumLWHu1gWBarOkifI0Wfp3hxmo/Y/rFmi7Ct2rhyB9uTS38
4ljTRbhv+dLWc0d0uK2nxinaehprcbLWgxdrbFgKLmJXNtcXhtsPv3HU2MJxg3V7
W0NHji8cOW7o+Jtdjduk9UhrEn6jOljGjSqK7I53OSY66iZGJ7RzXOk46aiecLXj
Qsd+B/fQi9FlpvOveJUZ5A8dCO+hzzAe+iw/Dz2eyLtM+sKh+HRTCJ7uytzy8HSH
pexK6lNpZsqslJNJuZWGpjydcnZyrUpXaLeYGcaAmKkNiH0qEbJLq8BwZ2rpDEsx
XYTnauEnDXeoFjYrxXQRXksLPzuZuriPp1NMF+H+nu59jnCf7pPGgPg6kQ+IeNMN
83n+6WKxpXeGMSI2JMiITp19G69dvzX/D7msx8UUEm3/sVJHbVzEbBJHJfvRSq3t
DbQSiYoq/rgYJU7qywTiQ6aPCFiofyOI3QRcf79AAM8vJELTXOjC8zGubgM3nHIP
hDO73PkZR/jljitLv9zPcRcV6d21bZp+b03xuxdJ4KflbcRl96XHw184D4gwOfw6
LyoqIjt27CADBgzQ/XAPHjzo9Qu+IsicifDHNZTyKG8yFixYKHv8UhRD6DB1iLij
zfkjZoRBBwcLFix44RBxxphTWIC1In8jXSijoSVjyVgyFVfGHFsx0rKx1Z90KCla
MpaMajJmK9IcqxVZMpZMGDJmK4oh1u88CxbCgdmKsA1mtSILFooPsxXh7QGrFVmw
UHyYrQhvaVityIKF4uMXd5H7ds/LH6ZRvSUexTC6or9UN6ugNTifF/ip393GlMBL
IfxbLPQlkQ3ubvGrtOA+EwYOf0JzG1cnZGL/Q/O+Gbk9verGfvarD9d5esSGAYej
ZvxcJ3bkp3M7d3jh2YP19zx/WZUVWcljxjS//ubYtbfH7Yz97uK1l1xoG7WhWddZ
P9dfe/fCkQvjB6/t9ujOTb89NudUwcZZuyYdmn7A2fbn6vE59om3nvtR7TWvfpN6
97q0wd+uteWt3nNLrbRbi2rnNRz1yJ6ve+y/ZmGLjxKXTOl0Xr9LZ04YvXvMetee
92q/9/wPj98Wk7jmsem/deiz1rHxr54vf3njTbYbH2tV+c6Lkpt0nBnvfHLelD75
jpjVI297/d2tmWm/vfhxhwFjXxk+NvfP/I3NM8d8+mWtu9/7pNOsdz5q2m3NdxPf
69SwYVbDF3/pOaHV+PMKP97Ust1/0/68d1ur+hf32/HZpuzC2MZnb895qOoPuUfu
/HfW9up/1pvcpEvDOS+evJgkXHxbzcp7v3vzGLm08OMZgzNWDu11zoG55Is7Xnjg
j2fu+O3VJnevvfb+ySt+b7D/t4ZHflpQZ3/LBkfeGdj/ocFHLvul155JBwZ+P+a3
2L9uzvhlVLNPt1z8/voORxYuuPzIiIeevfqZ5htefHdjnTuTOsXtqvpE9l6yu8Pe
hi8OTRh2dZXPvv7206LCjnM3j7x+58QTL11ydOSa3+8Ze9k2Z+cP23Sa82Jaj2WL
HGmL+3/Qc3mtomoDDv/y2vUrR35Y/embHDXfqt9jXqvZazeN+anWC9tn7xi//Ojw
G2cPf+34+00ffKhLvYnOKc9u3JR77d2DPnj2k2vsnR6Zt3vbE3/cOvnhJh1X3fPD
ew99OXfQyK2Dxw16+MoPNq65KevQwK/q114xYk7rLxrGxT1+9tAqZ73wdKfc1rsf
/6rhZ7+93/R4lzWb7u76W/6ozOe3n+re6qwLn5/0yl/DD81/ctVPvY8mLW7/xoq5
Lzxz2yU9flux/BaS9u6ehMkvd5w446YOV09sU7POc/u37mgzaVxSn0knF79wdPHn
c2ZVnXr+j5uav/Lgq00f3dt9/t6vj1c7ueyXj/sUjhxS2bAvGaNVdahFso/XWHYm
Q4MbxYAyAqidybvtfRKfS3A4Y/Qyiib7SCYZR6hGFV4gq0pgZzKaQNMK8G9nkkl4
UDTcTcO943ANzYuG41GxsMB2JvmUTDuTuJ7ZmdRfVzWA587gbWeSlwJY7gz8lbJ4
084k65VNO5P4HYFZkMzGI4PHOqTb9LtAjoy1IbW5UZkkK0w7k+P0FB6OyiG50nsI
bmeyms4oj+STAlJ6Nh0tO5PB0+XVwYOnC2nRRiPc0PLiWQfPK/R0meo7EDxdSIsc
IB9aXnzKwfMKPV3cDUPwdCEt2jcEQsuLR/C8gNDSLVldYkdoeZXPuoQj9GdePusS
kw0tLx7B8wJCS7dkdQmyoT/z8lmXIBv6My9PdYlaZ5lrCJozj1uqLr9k76QhrTGp
onMPX1NWFIHsTAa+AwC5M1DrLJi4U+uNBaSXLZngm3bU/4Ctly1F9wex3hLEno87
HOsttKAydZ8JzqRcFAqqj35uFlRZmrGBSbkgBeGJLfWCyNJ9JpQtiIdpOkR5K3D4
iAyPkll4qsDGz3J1nwllCwKfEuGhrBU46OnxKFmNKPOCKLsagS9x8VCwIKgVONwA
W2YqKytwM2O3OZ5y7HOuiv3TMc2xwUmX8io5LStwIkyLJTNj91eiZeZw0jJzOGmZ
VTSLJebmD+4EPsre3YZaLJl7WiyW9I170Lkz/rbUqXGvOFfH9099JO4j52Px7ZWy
97MhiL0fLPLKjFeU1N5PWRuviCePaj3OS/Y051tajzNLaznoceBWPHs/wVrPw6el
9eyL+daxI3aGMz42KnFl7BCnK/a8xHmxl6N3soVn7wd1ZYaTfqnuW21o2RFrugiP
19whhhuljcsrORfhLs1F/nDP08LncS7Cfcu3pPZ+nEHs/WCD44yy99Mpbqlzf/zT
qWPi/s/5jtZ13h23x/l8/LBU7qG7i/XQ3XoGZQr5QwfCe+iV7YHt/VQlRpdZxK60
7P2cOfZ+sONYoe39FNr3V1qmjYuYTeIYY/+j0hP2ulqJVFy7M2heKGm4bBSUwdj9
14H0vO3O4Opwyj0QzuxyR8VHCcINv9xxdVmVezS5LO4Tx/fxNZNGxh11vBX/d+Kd
ccmJz8R/l6iVotu33HmIZa63LDcnUGa4VstqLOcXf3vjTvjf3juLXMRTnh4JvZ4Q
88l8qfc3CBmhFflxrGz4xLypFcL/pDFnazF/cj//d4bVR3nKUQJzICqwxzn+TEhO
7Gdv5tiW8KPjRvv/HGsTPtFz951m8BCfl5GXu0Br3HHa9X8mmG6yxhPhcPtpbjMt
fFuC6f7ooOFwb9Tc/2nu2gTTxf0gnN4XcB87IcWfZrBCYgMR39roQMRAB6JrbXi9
qIrXNEPzka4TBg6/sdDVypWRVlCQVdgiPTO/hWGciyWH5PmhiQ5HdHE3zuhy0BnS
5aI0Y2EnuhTmIWaevmCPP4F8YW+fFB2f5vzXPixpd5zD+b29W9KxuLoV0Oa3XbuD
ZCLa/J4l6cJk5u/99/HHOn9OqPn7fWSc/m3lnjb9uXrqCWx++3bJMpvfeNI6ooq8
WNBaQicycuhi5q9NABf5u20kxbJnoK/JmcUXzOa3KM9gRMMVz6dqhTXVuIQL3+Am
1L433A2BbH6beZo2vwGzhYfTFIQ794LZFNLiRyf2SUhzdot/KDE3weE8P/7WxM4J
FbEpxBH82BGbQt5Jz2UeyMzfm3WKV9MFGm/M1JsCXgctaVOgHR4pvabgmy1FJJrC
Yl/z9zu1wtKrP8SMsHLfFCzDjWHLnInwxzWU8ihvMhYsWCh7WIYbLVgoPViGGy0Z
S8aS8ZaxDDdaMpZMSWUsw42WjCVTUhnLcKMFCyWFZbjRgoWSwjLcaMFCSWEZbrRg
oaSIrOHG8VHUcOMQzXWdRw03ftzlq/SqG7d+/O577RpMSTjnpuxD78U22fXUU83a
Drvk4tlF3ee+Yl9/59qxL37y60tTB0yNueu/RheM/n7GX11G779q0c9r573XqW/T
6U8+3e2Hnb8feOPAb0fGPVp1yq6ParRtvGZa11dm9a2995/Fax8fWXnFY9duGVk4
sK3tzSOjB4+xP7H6kiltbv901/HbD8Z9MP2TfvVnpjVZ0uDWgb1r5N089/yHmmzv
PvqWs2+86FDUhBu+HPfdPRMu7xR7ecOoxZeetWHU9Od6zLvy6w9/2PzvlpFX9+n5
1JS9n9/3+a5Dud0eit/wTIcWXa6usfy1FR2aXtBi1+gBTSaPeGJMiw2Fezc/ceKO
wx/WbZCWt+NY7dtbZpx8v3a1v47+Hjv16vykezIzV7z/Zvyxjrtfumtu7bWb3x14
oNfSc8dM+HHoyQsbbF8//da5WQ99lt7s94dvr/O/hbMyLu7QoMaeG2MPzPj++MGC
q89r0+rVx5MGvLu/RtarLdcNHfDG5z2mL/jmvO/P+mrTJTXX3mdPvrjyW5POP+44
+vovQ57P2/zt9oWdn550fv6LkzZ92/Gv/iuur3y08tFJRfajvw7q1SXurh6/dfq4
Fem+reDJLzbecUF+lwv7p+1Mzrnm2S/bddua/IO701/ujuv6tKze6uC/m9rdszEm
68uZnf67sVPmhdPOnXUqZsfbN83du6rrqId23z+m+6ihDUceHX+433Nxe+IOPrbo
7kfqvj3uh8ffSlzXrPKc5s0Gv5w04rJO//b57c3UB4evPr630dRLezyXmLg3usV1
PzS459wlrf77r2fXA2u2ZWV3XfRF/8wrmny+qmhe5rpuW96YMty9ZcbC34//1z8t
7bsZnTfXbzJn2uZ9p1YWjh135FhO4ZODf39o01+HZi29rbDywda2QfNe+4O3vRir
1VaMFpmWzcWQ4EYxoIwAanOxqX1IYmZyVWes8VLhCyST9NCaPaayeJv3HAKbi3h3
GF0BifG1uTjdeBHP83F3LeKrV0Zo/wvdhteMI+bLXCwcj4qFBba5yKdk2lyEy2wu
ngtRAwhh5942F3kpGfgrZTBtLjKYNhfRzeL9epm9w/pu6jLrRedw/nj93cR0Gxj1
iLpAu5qmcPOT5yfsq/KKcUVwm4sZego9oy4iraX3ENzmYnW9VN2kDWlLSs++oWVz
MXi6Hj0DEkq6kBbtFcINLS+edfC8Qk+X0y0JIV1IixwgH1pefMrB8wo9XdwNQ/B0
IS3a+gNCy4tH8LyA0NItWV1iR2h5lc+6hCP0Z14+6xKTDS0vHsHzAkJLt2R1CbKh
P/PyWZcgG/ozL091idpC6mEImjOPLtUPrp7W+QbdT+cevobjKALZXKxqahf5AXJn
MC3o/U7qekKRngCPdawTOgu+TlDrjD20eeq5ellRf0+bt79XlLc/OuYFbYZo+mNi
vf12O/MHsdJU+na7/tCLmhUjChkyvEYh/wsdcf4rCZP0jaeqHsErDRCaVGhVlkfx
r2CmvC4QwjkDkATVt49+blbfUE154V4CI6zq64n1rb5Bqpcn1qpexa4sxb+CVS/x
V5JVvazq5YPiX8GqV0/PzShutfUiTgIomUXGCmysVHyoyhaEW/eZUNZqq97BcShZ
jSjzgii7GtFW95lQsCCo1VZcAppAWVltTYvd5UhL+dXZLfakw5Gy2Uk3A851WlZb
RZgWG662v5DUNSHfWWT/OKl5QlXn9fZXk9olNK+AFhsc2h2cS0SLDc9L5jZsE+KL
j557b+z4A7rFBn07SIpXolfqFhuitB/pPcgQBEXr9dnLYoNvScssNnhqdlSRFwua
e6BNAI+YmRF89AH5AkmJyeFKXMMyDmaxQZRnMKLhiuentMLSXUPMCN/gJvqk1w13
QyCLDWaepsWGZVELbdRiwwvkkahwmoJw514wm4LDMSnxZFK+M82xKHFXUlXn2Y47
E/9IqohNIVG7g/N8msKJfz2XebAiZc3zt/T7rDX1UeMlZlPgX1UHCla20ptCdCk0
BTYYlFpT8NeCI9EUFvsaLzmlFZanKbCwkjaFvvYZUbQp9I55osyaQrw2kh6uREfS
qk46klZ10pG04jQFOpcw/bgTdocoX2qNuMdpsUZ8OH6ec4RjRmrVhPXOSx1DUpsn
7HBmOC63bHnroBbj8PJAWdjyLmubpfHkQm0e2t2e7xygzUNbai0H81C4Fc+Wd7DW
0/O0tJ5HYg467op90LkuJilxcOxI5/aY+okdY3uid7KFZ8v7Ee1GHtSuh3tQGwju
ijVdhK/TwkcabpI2cg2ONV2Eb9fCkT/c+lp4x1jTRbhv+ZbUlneNILa88eLMGWXL
+7v45o5bHGmJ9oSujl4OR2KthOsdrR1/OLiHXowuM51/havMIH/oQHgPfZbx0P3Z
8j6HyLtM+kKh+HRTCJ6uZcu7otjyxptsFdqWt91+oFJne0ttPEzUj8r2I5Xa2utp
JVJxbUrjVwP7Ze/vFwjg+YVEaJreNqVxdTjlHghndrnj5yP7GRl+uePq0i93ywRk
2DJnIvxxDaU8ypuMBQsWyh6WCUgLFkoPlglIS8aSsWS8ZSwTkJaMJVNSGcsEpCVj
yZRUxjIBacFCSWGZgLRgoaSwTEBasFBSWCYgLVgoKSJrAvLlKGoCconmNq5OTUC2
GbndXfXORjFXVXX26PhE17VkUPI7t03f/oDjudTU52JebL5x0dP/u7rLOfe79ib9
stZdrcbiZmkbao2JGrnhrPhRma/M3zn4mU7TmxTWbfDXff+9cezEW8eufXH17tff
jr1j2z/2tlttta6ZduSZhS1uaVd347VbaubtvTP31pbvTL//8OBL9k2u+dGIwpNb
/z6xPv2nz5Z+Mve966sda/Hh0cmd17dZ2udkkw4ru3541fFZS6fn5E/I7dti47e2
HS9NuNQ5MXtx84y67hmD/hn6/bZq2yal7kv67ZExva+b3P5E3es+vPijO9MOzJt+
8WPjX+nYdszq75esfPmeK5fl1/q9bpU551ZpP6Heulrn3/vSdfuqPXnS/c/FB20P
Ppn200/jF2RG7bv3x/PvuXfsva+92+rDn5L/eeLNhxrNubTPqbpF8+qezE0YM2X3
LXcsfenAexm1d65u5jgwl6xI6GX7oWX87p+7Vh67tda/bb7vuGX3vQc+y/nflmtm
HZj+7ouNG+2fu3PFO0d/nbP/5W9v+OX3W3fu7rl0fsd7bp69f13O/P0XNO75Wpv5
9/d+5P7opHMXpKxu0vbSd2xvzt/Q4qrtg1aP7nTluFv6Rj/cokfTdU8MXPL7lPt/
+mbY92f9UHWJ7bGHb1/QsPeyXssWOdIW99/cc3mtoo7pE/++LHve9gl3bVrYdmPL
MWc93aX+yJdevPPD88bXz1l4Q6t+/er3TZvy5j31f/jEWeuO2j+O+XRm7yfnZfQ5
2HL60x23jDrY4eY3Mz586Kmr3s8ctPmXyzLyDqw6N6Nj0+/H/Tf66VaXPzrk+5wR
fxzYtW/Pnu11Rzw56LPVm959d+O4r5b+88ZVsaeeyy0466eF+zq1v/Gfqc8/c9vG
Hh/vWPTcG09ef9+k9m9EdV3y7RebP+v+9vfPH+v1RSvyyMDDj735VZ0LN3xVf/Mb
i2c9cOWRnt+5XiuIatFv1J7rWz17dGm99x/vPClz5rJ9yzYPOX75tflZJ2NfW3+o
Km9BEuo3UIz836jRN7tGXeuyLEmGBjeKAWUEMEuSfRMvS0h0xutlhM81Z5JxhOpU
4RWyxgSWJKMJPmsP+FqSnGm8e8YkPCga7qbh3nG4huZFw/GoWFhgS5J8SqYlSdwl
syTZwBAH8Joog7clSV4KYLkz8FfK4k1LkqxfNi1JorahasqsODJ47D+6Tb8L5Eim
Dan1ihpIBoVpSTJLT+GqqCGkUHoPwS1JNtMZXUuuI9eT0rPaaFmSDJ4urxAePF1I
i1YY4YaWF886eF6hp+vRdyShpAtpkQPkQ8uLTzl4XqGni7thCJ4upEULhkBoefEI
nhcQWrolq0vsCC2v8lmXcIT+zMtnXWKyoeXFI3heQGjplqwuQTb0Z14+6xJkQ3/m
5akuUfssvQxBc+ZxS9Xll+ydNKQ1kqBzD94+S6iWJAPfAYDcGUxbadR+YwHpZWtA
Tp5i9hwfsPWyNdT9Qey3BLHo4w7HfgstqIG6zwRnVE4vqD76uVlQZWnIBgUVpCA8
saVeEIN0nwllC+Iqmg5R3g7cEE4CKJmNpwps/qxQ95lQtiBMWhTK2oG7TveZKFmN
KPOCKLsacb3uM6FgQVA7cFic0rWnSVnagfvE0d7xg7Nb7FFHXcfbTrqU53RaduBE
8BZ/DlSiZZbopGWW6KRlVtFslpjbP7gT+Ch7dxtqs6TXabFZcsK+yHlz/KxUV9w7
zh7xw1Lz43Y5W8V3U8riz5YgFn+wyCszX1FSiz9lbb4CFn8+cXS3t3QO0HqclrqW
fd9EuBXP4k+w1nPVaWk9j8TsdtwVe7dzXUx04uDYQuf2mOqJHWM7oXeyhW/x524n
tfiz20Et/TAX4bD0U2i40YnU0g9zEQ5LP8gfbvVEaumHuQj3Ld+ytviDDY4zyuLP
r/b1zrvi30ytHLfHOTh+QWrTuOPOjvG3pXIP3V2sh+7WMyhTyB86EN5Dr28PbPGn
MTG6zCJ2pWXx58yx+IMdR8vij+coH5ZntNpA6hsuGwVlACMGpOdteQZXh1PugXBm
lzt+6KHc4YZf7ri6rMo9mhywv+OYEn9HUmLcfkef+AFJ9eJOOtrGd0jSStHtW+58
6xHLXI9zcwJlhvFaVmM5v/jbG3fC//beWeQitDzZ/XvqCTGfzJd6f4OQRK3HGoBH
4BPTRyuEXKx5+MS8pF2zn/v5vzOsPspTjhKYA9FnsX8nPJBwyvF3bE3H8ISvHKn2
HMeVCe/quftOM3iIz8vIy/2Z1iH/rU2dH0gwXSxvIBzu35pbU3OHJ5juV0Y43FRt
BM/R3CsTTBf3g3B6X8jpPuMugOJOM1ghsYGIb210IGKgA9F4G14vquI1zdB8pOuE
gcNvLHS1cmWk5WdnF7ZIz8hvoTfWaE9ytKKYQxMdjujibpzR5WDGQpeL0oyFnehS
mIeYefqCPf4EMtH+ZNLSuJbOx+wfJBXFJTrvsC9PmhdXrwJa/U7R7qABEa1+z5J0
YTID+PI+/ljnz/WDGsDfR8bpX0/uadOfq6ee4LVD3y5ZZvUbw56OqCIvFrSW0ImM
HLqY+WsTwEXy26ZLk2J7pa/JmcWHX7doTpATXxoGRHkGIxqu17lWUFNxGJdwMhvc
hFr4hrshkNVvM0/T6jdgtvBwmoJw514wm8LHcWMS/41v6TwSNzfxi/hE51dxkxN/
i6+ITaGSdgcNfZpC3knPZR7IDOCbdYpX1AUab8zUmwJeBy1pU/AsXJdWU/DNliIS
TWGxxAC+VliepsDCyntTsEw3hi1zJsIf11DKo7zJWLBgoexhmW60YKH0YJlutGQs
GUvGW8Yy3WjJWDIllbFMN1oylkxJZSzTjRYslBSW6UYLFkoKy3SjBQslhWW60YKF
kiKyphvHRVHTjYM113UeNd348ajt6VU3trLXePqJHrs+eM9+0x35Y9rcs/bPuIUP
9Om5rMOG5y7rOypr63ebVy3+pvAUmfpeyolGF/zySr1TsdfN+mZczbtefa/juh6O
hQsumzt44+PHFr318ccjup36ddL98XWmj2jbtNX5t0Z9Ufu8de/bEvtcXOfrgbEN
d+z995yRL7ao0i1pZ0L20hkfnHp2yvCrz53ccfUnNw5efWmlmpd8Ou2X0fcnDp6U
MLJ1/e8/frbzfyN/KPr7+YXdu2fMeY0MuSI2vm/hT00uH/bQC599vnz0v5fM2v5r
zX/6vbDmk+vbJT0VFd/k82UZjze84dean2y+qOuIzJVR/fsOqhG79omrb756yrV/
PPv2/JYtjv63/buOM99K2Th38oVvnjer2V1jrrh2/xW/3DD6rb/ffOmLk+0vyDx3
wojuj15xXbXOR15osHB/tfpXvvbexY/c83SNSVUzs3+9qnu7y9+xTbl2T9Mj652t
ijo2mzHu36+j/urX5LnDjV664Ozcc2q9+to3y3L6r1nYdsftH47f1q3+ly/c9fYF
z1Zbde9z3za/pdIF/S4/mj6x79E/3njktzcefXLTZx9+ts62+tmb5r826Zz1yyad
Ovp19EqycPLJ76vMqbVslfuVn0bu3tJrWMqMnuO+yk+fE73t00N/9ulZaWLrLzsc
nTeg0ZKdW6754sJ3E+ft/aWLO+nbF5I+nj7p5RNTtjw66ecPe2v53vJUraJm2/7+
o8cbVe9+vNmBvWn39VzasKDzprMaXLRtQefVtd5I/XT468c3NZra6ca1lRJnd29x
3ZHzL5u+Z8LUqa1PXpSz7fiaba2vf/7CUf2u+7TbfavmzTt/XZ8tf9TPbXjt5o9m
nP3I2HYHCh98ZNO+zLe3rS4cO+Gvn9MKb1s1fPO+H96vfsv89/7pddEj61bzphcT
tH+ojNm65s04YtlcDAI3igFlBJg2FzOTE50JxkuFI0gmydV+DjoIfYM4jcDmIt4d
RldAYvzbXPR83l2LaF+t3/hPLu7rNrxmHDFf5mLheFQsLLDNRT4l0+Yi7oXZXMw0
xIEM7tzb5iIvBbDcGfgrZfGBbC7iblKJ3OZifTd1mfUi3h+vv4ydbUNqvaOGa8+B
pvDA1g2zXKlLjSuC21zM0VPoEzWKjJbeQ3Cbixk6ozFkLBlHSs++oWVzMXi6nPZF
COlCWrRXCDe0vHjWwfMKPV1OtySEdCEtcoB8aHnxKQfPK/R0cTcMwdOFtGjrDwgt
Lx7B8wJCS7dkdYkdoeVVPusSjtCfefmsS0w2tLx4BM8LCC3dktUlyIb+zMtnXYJs
6M+8PNUlaguptyFozjyqDX/77OFvT9D9dO7haziOIpDNxapedUMG5M5gWtD7ndT1
hCI9AR7rWCd0FnydoNYZc/V5KsqK+ncJ/sk2b3+dKG//+4L/s+gR2rzH9E+M8fbX
iPX2bxD8g+3MH8TKU+nb/fpDf1RYeQbwkCDDayTyv/AR57+SMUnfeKoqErzSAaFJ
hVbleRT/CmYKbLgQzhmQJKj+ffRzs/qHagoM9xIYYVV/T6xv9Q9SvTyxVvUqdmUp
/hWsesGsAw+relnVywfFv4JVrz6em1Hc6usoTgIomUXHCmzsdLTuM6FsQYzRfSaU
tfrKWxMBSlYjyrwgyq5GjNN9JhQsCGr1FaMhaAJlafU1LYVafXWkUKuvmcmW1Vdf
mBYfWtlvTpqa0NI50L4wqW9CovNS+/SkcQkV0eKDU7sDbNZ4W3zYJJnbsE2Mz5+5
u+WfjxzULT7o20lSLCWLdIsPUdrEOlc39d4yWm8CXhYffEtaZvHBU3ujirxY0NwD
bSJ4xMyM4KMPyBdIStxKx5W4hmUczOKDKM9gRMMVz09phaW7hpgRvsFN9EmvG+6G
QBYfzDxNiw//Ru20UYsPI8hTYTUF4c69YDaFrxLGJNZKbuk8lTA38Z+kROeBhMmJ
lZMrYlNI1e4A+2beTaHZCc9lHnyZGXPksa+3tqY+avzEbAr8q+6Aa0W03hSiS6Ep
YFdSR2k1BX8tOBJNYbHE+IlWWJ6mwMJK2hQW2PtE0aaQGHNldFk1BWoLnI6kiU46
kiY66UhacZpCaNaMe58Wa8aH4xc5RzhmpVZNeMd5qWNYavOEXc4Mh2ULnIJanMPL
B2VhC7ysbZ6qZAu8z2lpPZYt8OC2wPHizRllC/y7+PMctzhqJNoTLnL0chx31Ero
6Wjt2OMI/6HrGZQp5A8dCO+h32Y8dH+2wNOI3BY4fSNRfLopBE/XsgVeUWyBY0Zv
2QL3HOXDJjUeJ0ZouP5+gQCeX0iEpultkxpXh1PugXBmlzt+PqLc4YZf7ri69Mvd
MiEZtsyZCH9cQymP8iZjwYKFsodlQtKChdKDZULSkrFkLBlvGcuEpCVjyZRUxjIh
aclYMiWVsUxIWrBQUlgmJC1YKCksE5IWLJQUlglJCxZKikiakFxOvoulr/Jg3Psb
gROhVETBv5chvqMh+gMKM8hk4IryfJz+dtdESlkmW2owiCMnPg8xP9EfUJhBJgNX
lOfjIk0c9YPPQ8xP9AcUZpDJwBXl+bhIE0cD4fMQ8xP9AYUZZDJwRXk+LtLE0bPw
eYj5if6AwgwyGbiiPB8XaeLIj89DzE/0BxRmkMnAFeX5uEgRX04ezKb9fC7x7ed5
iHcg+qU0RchkKDl54nAjVRR8P89DzE/0S0mJkMlQKvLE4UaauPg2q5if6JeSEiGT
oVTkicONNHH08zzE/ES/lJQImQylIk8cbqSJsxkkg5if6JeSEiGToVTkicONNHGq
GWBCzE/0S0mJkMlQKvLE4UaaOGbzPMT8RL+UlAiZDKUiTxxupIkblhQ9EPMT/VJS
ImQylIo8cbiRJs6/9g+I+Yl+KSkRMhlKRZ443EgTF3/8ivmJfikpETIZSkWeONxI
E/c2GuPLRfRLSYmQyVAq8sThRpo4s6rDIOYn+qWkRMhkKBV54nAjTRyKPDzE/ES/
lJQImQylIk8cbqSJ69qHHMT8RL+UlAiZDKUiTxxupImnCMFifqJfSkqETIZSkScO
N9LEOWNXOsT8RL+UlAiZDKUiTxxupInruvMcxPxEv5SUCJkMpSJPHG6kiXvM4xgQ
8xP9UlIiZDKUijxxuJEmXlkIFvMT/VJSImQylIo8cbiRJl5FCBbzE/1SUiJkMpSK
PHG4kSYu6sqL+Yl+KSkRMhlKRZ443EgTP0sIFvMT/VJSImQylIo8cbiRJn62ECzm
J/qlpETIZCgVeeJwI028mhAs5if6paREyGQoFXnicCNNXFSxF/MT/VJSImQylIo8
cbiRJn6uECzmJ/qlpETIZCgVeeJwI00c5qN4iPmJfikpETIZSkWeONxIE68uBIv5
iX4pKREyGUpFnjjcSBPH2xU8xPxEv5SUCJkMpSJPHG6kicOuFg8xP9EvJSVCJkOp
yBOHG2niMC/DQ8xP9EtJiZDJUCryxOFGmnhtIVjMT/RLSYmQyVAq8sThRpq4SwgW
8xP9UlIiZDKUijxxuJEmXsfwss1DMT/RLyUlQiZDqcgThxtp4nUNr3LE6xle5YjX
N7zKEW9geJUjDsOBgHLEGxle5Ygze9HKEW9ieJUj3tTwKkccH6wBlCMOw5WAcsTx
0UFAOeJphlc54i0Nr3LEYQIXUI54huFVjjgOQDniWYZXHeLHKXGWPjQV7vinykVi
fqJfSkqETAauKM/H6cSP0w8IyGRLiqRGA2d2nfpOazHcH3zy5wN8Ig3IZGRk+Did
OBcuypYWAusl0RpHId6B6JfSFCGToeTkicONWOU3iCMnJYmjtStJHHpJShJHt6ok
ceSnJHHoJSlJHHpJShKHXpKSxM1vx1GI+Yl+KSkRMhlKRZ443EgTNz9fTSHmJ/ql
pETIZCgVeeJwI03c/Kg5hZif6JeSEiGToVTkicONNHHoJSlJHHpJShKHXpKSxKGX
pCRx/EZXkjj0kpQkXpkoShx6SUoSh16SksShl6QkceglKUkceklKEodekpLEoZek
JHHoJSlJHHpJShKHXpKSxKGXpCRx6CUpSbw2UZS4iyhKvA5RlDj0kpQkDr0kJYnX
J4oSb0AUJQ69JCWJQy9JSeLQS1KSOPSSlCQOvSQliUMvSUni0EtSkjj0kpQkDr0k
JYlDL0lJ4tBLUpI49JKUJI5DSeLQS1KL+HFKHOkjN2gq3H6kWmsxP9EvJSVCJgNX
lOfjdOLHy04v6cTaWT1Gn/yutRjuDz758wE+kQZkMjIyfJxOnAsXZUsLgfWS+C/o
iHcg+qU0RchkKDl54nAjVvkN4qziM4j5iX4pKREyGUpFnjjcSBMHaSWJQy9JSeLo
VpUkjvyUJA69JCWJQy9JSeLiF3HF/ES/lJQImQylIk8cbqSJQy9JSeLQS1KSOPSS
lCQOvSQliUMvSUni0EtSkjj0kpQkjt/oShKHXpKSxCsTRYlDL0lJ4tBLUpI49JKU
JA69JCWJQy9JSeLQS1KSOPSSlCQOvSQliUMvSUni0EtSkjj0kpQkDr0kJYnXJooS
dxFFidchihKvSxQlDr0kJYlDL0lJ4g2IosShl6QkceglKUkceklKEodekpLEoZek
JHHoJSlJHHpJShKHXpKSxKGXpCRx6CUpSRx6SUoSh16SksRxKEkceklqET9OiSN9
EMcxZ8nqM/d7SWMHVh0+9qHPW4vh/uCTPx/gE2lAJiMjw8fpxLlwUba0EFgvCQob
DOIdiH4pTREyGUpOnjjciFV+gzhyUpI4WruSxEFaSeLoVpUkjvyUJA69JCWJQy9J
SeLQS1KSOPSSlCQOvSQliUMvSUni0EtSkjj0kpQkDr0kJYlDL0lJ4viNriRx6CUp
SbwyUZQ49JKUJA69JCWJQy9JSeLQS1KSOPSSQBxLUICYn+iXkhIhk6FU5InDjTRx
6CUpSRx6SUoSh16SksShl6QkceglKUkceklKEodekpLEaxNFibuIosTrEEWJ1yWK
Eq9HFCUOvSQliTcgihKHXpKSxKGXpCRx6CUpSRx6SUoSh16SksShl6QkceglKUkc
eklKEodekpLEoZekJHHoJSlJHHpJShLHoSRx6CWpRfw4JY70QRyaCivfTztz9ZL+
alC90is7328thvuDT/58gE+kAZmMjAwfpxPnwkXZ0kJgvSRW8QHxDkS/lKYImQwl
J08cbsQqv0EcOSlJHK1dSeJ8Hw+I+Yl+KSkRMhlKRZ443EgTB2kliSM/JYlDL0lJ
4tBLUpI49JKUJA69JCWJQy9JSeLQS1KSOPSSlCQOvSQliUMvSUni0EtSkjh+oytJ
HHpJShKvTBQlDr0kJYlDL0lJ4tBLUpI49JKUJA69JCWJQy9JSeLQS1KSOPSSlCQO
vSQliUMvSUni0EtSkjj0kpQkXpsoStxFFCVehyhKHHpJShKvRxQlXp8oSrwBocQZ
eTE/0S8lJUImQ6nIE4cbaeLQS1KSOPSSlCQOvSQliUMvSUni0EtSkjj0kpQkDr0k
JYlDL0lJ4tBLUpI49JKUJA69JCWJQy9JSeI4lCQOvSS1iB+nxJE+SENTocfM7Weu
XtKJcY1mPz9mV2sx3B988ucDfCINyGRkZPg4nTgXLsqWFpaT72Lpqz94Y53pJaGr
A/hcxTsQ/QGFGWQycEV5Pi5ild8gjpz4PMT8RH9AYQaZDFxRno+LNHG0dj4PMT/R
H1CYQSYDV5Tn4yJNHHpJfB5ifqI/oDCDTAauKM/HRZo461ZZsJif6A8ozCCTgSvK
83GRJo78+DzE/ER/QGEGmQxcUZ6PixTx5WR+Fu3nc4hvP89DvAPRL6UpQiZDyckT
hxupouD7eR5ifqJfSkqETIZSkScON9LE+U+AAmJ+ol9KSoRMhlKRJw430sTRz/MQ
8xP9UlIiZDKUijxxuJEmzn7AMIj5iX4pKREyGUpFnjjcSBPnp9GAmJ/ol5ISIZOh
VOSJw400cczmeYj5iX4pKREyGUpFnjjcSBOH/ikPMT/RLyUlQiZDqcgThxtp4tA/
5SHmJ/qlpETIZCgVeeJwI00c+qc8xPxEv5SUCJkMpSJPHG6kiUP/lIeYn+iXkhIh
k6FU5InDjTRx6J/yEPMT/VJSImQylIo8cbiRJg79Ux5ifqJfSkqETIZSkScON9LE
oX/KQ8xP9EtJiZDJUCryxOFGmjj0T3mI+Yl+KSkRMhlKRZ443EgTh/4pDzE/0S8l
JUImQ6nIE4cbaeLQP+Uh5if6paREyGQoFXnicCNNPFUIFvMT/VJSImQylIo8cbiR
Jl5ZCBbzE/1SUiJkMpSKPHG4kSYO/VMeYn6iX0pKhEyGUpEnDjfSxKF/ykPMT/RL
SYmQyVAq8sThRpo49E95iPmJfikpETIZSkWeONxIE4f+KQ8xP9EvJSVCJkOpyBOH
G2ni0D8F1NlDN4hD/xRQjjj0TwHliEP/FFCOOPRPAeWIQ/8UUI449E8B5YhD/xRQ
jnhtw6sccZfhVY54HcOrHHHonwLKEYf+KaAc8fqGVzniDQyvcsShfwooRxz6p4By
xKF/CihHHPqngHLEoX8KKEcc+qeAcsShfwooRxz6p4ByxKF/CihHHPqngHLEoX8K
KEccB6AccWgkAuoQP06Js/Txwv4NP1zUWsxP9EtJiZDJwBXl+Tid+PGyU8N8uc7R
Psu+PtBaDPcHn/z5AJ9IAzIZGRk+TifOhYuypYXA6jm0xlGIdyD6pTRFyGQoOXni
cCNW+Q3iyElJ4mjtShKHeo6SxNGtKkkc+SlJHOo5ShKHeo6SxKGeoyRxqOcoSRzq
OUoSh3qOksShnqMkcajnKEkc6jlKEod6jpLEoZ6jJPFUoihxqOcoSRzqOUoSh3qO
ksShnqMkcajnKEkc6jlKEod6jpLEoZ6jJHGo5yhJHOo5ShKHeo6SxKGeoyRxqOco
Sbw2UZS4iyhKvA5RlDjUc5QkDvUcJYnXJ4oSb0AUJQ71HCWJQz1HSeJQz1GSONRz
lCQO9RwliUM9R0niUM9RkjjUc5QkDvUcJYlDPUdJ4lDPUZI4DiWJQz1HLeLHKXGk
j9zwwv7GW748c7+Stqfb24cmtvyqtRjuDz758wE+kQZkMjIyfJxOnAsXZUsLgdVz
+O+piHcg+qU0RchkKDl54nAjVvkN4qziM4j5iX4pKREyGUpFnjjcSBMHaSWJQz1H
SeLoVpUkjvyUJA71HCWJQz1HSeJQz1GSONRzlCQO9RwliUM9R0niUM9RkjjUc5Qk
DvUcJYlDPUdJ4lDPUZJ4KlGUONRzlCQO9RwliUM9R0niUM9RkjjUc5QkDvUcJYlD
PUdJ4lDPUZI41HOUJA71HCWJQz1HSeJQz1GSONRzlCRemyhK3EUUJV6HKEq8LlGU
ONRzlCQO9RwliTcgihKHeo6SxKGeoyRxqOcoSRzqOUoSh3qOksShnqMkcajnKEkc
6jlKEod6jpLEoZ6jJHGo54C4Ot9SMYjjUJI41HPUIn6cEkf6II6j3vA6rcX8RL+U
lAiZDFxRno/TiR8vO/WcjrN+6ndHi32txXB/8MmfD/CJNCCTkZHh43TiXLgoW1oI
rJ4DvQUG8Q5Ev5SmCJkMJSdPHG7EKr9BHDkpSRytXUniIK0kcXSrShJHfkoSh3qO
ksShnqMkcajnKEkc6jlKEod6jpLEoZ6jJHGo5yhJHOo5ShKHeo6SxKGeoyRxqOco
STyVKEoc6jlKEod6jpLEoZ6jJHGo5yhJHOo5IK7OFoNBHOo5ShKHeo6SxKGeoyRx
qOcoSRzqOUoSh3qOksShnqMkcajnKEm8NlGUuIsoSrwOUZR4XaIo8XpEUeL1iaLE
GxBFiUM9R0niUM9RkjjUc5QkDvUcJYlDPUdJ4lDPUZI41HOUJA71HCWJQz1HSeJQ
z1GSONRzlCSOQ0niUM9Ri/hxShzpgzhe2H+ta63WYn6iX0pKhEwGrijPx+nEj5ed
es7cZl1aVtv8fWsx3B988ucDfCINyGRkZPg4nTgXLsqWFgKr57CKD4h3IPqlNEXI
ZCg5eeJwI1b5DeLISUnivCYiIOYn+qWkRMhkKBV54nAjTZzv4wExP9EvJSVCJkOp
yBOHG2niIK0kceSnJHGo5yhJHOo5ShKHeo6SxKGeoyRxqOcoSRzqOUoSh3qOksSh
nqMkcajnKEkc6jlKEod6jpLEU4mixKGeoyRxqOcoSRzqOUoSh3qOksShnqMkcajn
KEkc6jlKEod6jpLEoZ6jJHGo5yhJHOo5ShKHeo6SxKGeoyTx2kRR4i6iKPE6RFHi
UM9Rkng9Qokz8mJ+ol9KSoRMhlKRJw430sTrE0WJNyCKEod6jpLEoZ6jJHGo5yhJ
HOo5ShKHeo6SxKGeoyRxqOcoSRzqOUoSh3qOksShnqMkcajnKEkch5LEoZ6jFvHj
lDjSB2n96zlxca3F/ES/lJQImQxcUZ6P04kfLzv1nCXd/9dn3549rcVwf/DJnw/w
iTQgk5GR4eN04ly4KFta6BbfNpqQPhMGDs/U3JVdtGrW/9BjW0dud1ed/szSQlvb
K0f83eziQVsXnL1p0JxXlrYdtmNGz6ies6us+9H5RcorsQkr3j77ieavt/uuzs56
i4ry9pwVn3XuV5d/kPVrpWHnLej+3Jr/Zn688NHv5z/a4ZMRRxce2pra9p8L7hj+
yjffJk84uf6VHr9++mz/lP+te3XTyGdf2v3C8D31/u0+6+BdlS9o2fHEoeGLjize
em7q+DrJr//8SvMPJzw2L/er2TX+zuv1UnzWZXc83q7d2vdnrZl52VP9vx3c7cNd
zyz6Imm96/LbR9f5cNDx7jdOvuveXxe0O/pRn9mdF754VreN2V+uH/rSrJobRx58
dPyglyb/dGRwQcEf+fe2+6vphHWrmrw3oH7M8LsOTfqkcHW/VY8/+s+9B+/dVqXu
5a1+vnLOuQ77vmrbRzzYfPOybb/WuKrnkm/+ONrx5vRzhvz8eKMHnn325U6T8069
eeyh+OtWHB580aq9y9PHNnm7wUVzq73XcuitXROfrX3Dt4Mf6Xlk3JiThb1HT0k7
0uVEn71fX7Po9o+OrRq7tWm/+VX+Xt5p0Jt7NFR7f+6YHR1Ha4ju9cEVLd/WkHz1
uZe8ERMXF5c3urDG0co1atT4esNng8fWXvHo/S03Hev18ri6uz+7dEs1LfzE+tcy
Z70en5Jy0VHtmn7aNY9PWn7fkrTbbr+9SystuWpaas8sqj5r/V0/NVw36tiX+zt/
P/Or+44c6t767HZ/r+/c/sMDS5YWHLFd+vobn9++bcy736w98NrDn53T//q+73fY
NfGD9451GzN9Uv+6OX9du7nVtc3OG3jFh0tffGPFJ+3feLf94sd7Ptpy1A0dl9a6
oMXZw2p9NGjo179ueidr7SNDN/5aq0r/wdVW9D/S/q1Jn/269Kaxtd9q8EL6LRef
aPhhn1ffPbq42YWtcid9/kPj1e/vP9Brdtec6MffeOB4u5aNbnCe3S0vKfr7W+df
v/On473GP3ng1uuu7P7njML5g56e+Po7W2Z+v/qe+bHNvp9xa60va+1sOOzNnQ0P
vNrpn/+WvDy8Su/cRSP+OHzDjztHZJ48Nqj38WtGzLl79G/XXLTp/+Z0fuaWlw6v
/nXgoYGH5r807ZbRH7t2rD02+Rftbre/ftMTN96fcODL9+/d81+tma1uerT9a5We
7Vf366s7N+owata8Rya83O+Lj1wrGi188NSR6m9kfrhsT/ezFh1+6tZ3Nh+tfYu7
z+A+hSOHVHZXLkJv6SAJuiZAfovBhcOHa97GWq99vta0ZhuDCBoy3q0sqwZd0YBi
QBkBVfQ5VhN738SM5ESnQy8jmxaWSaqRJP29hqQYjMpRZAixaf+gVkViFpHbCH17
EcngmplQSdD9WHsxInR0cDOvJ46YHSwL50ebIVp+mAcwbHAbJ/rT41OqqmtCICSV
4L0b7MpHkWyIGoAGJDtfTDro8fTgpWTgr5Rhtv6GNlJiOMsTgrf88MJbNXIhF09R
303dw8YImM/541GPSb4NjPpFTSFTjRSGDR265a9V5xtXsCsJ2boFMP1JZKVe5wv0
FPpHTdOek+weerv9+2kKOXqp3k7uINPJU6QdoepVgSCWjwjImCklmRXEB+KVIiBT
eve0rAhPjb+b5zxrC0wmGJ4lLuJdF2QILV1oejAETxfSy9zeHOCGlhfPOnheoacL
pQ2G4OlCWuQA+dDy4lMOnlfo6eJuGIKnC2meA+MRWl48gucFhJZuyeoSO0LLq3zW
JRyhP/PyWZeYbGh58QieFxBauiWrS5AN/ZmXz7oE2dCfeXmqSw2K7iSYUdAwc+bR
pfrB1dM639u6iLC5B2VNyz+dXEuDiHmN6UZ58q2qzxMDAbkz3KQzxCL27/rbFxRI
T0BrFntCZ8HXiUZ6/TpHu8Nsvayof4Dgf1bwHxb8+TZvf5Hg/z/B74zy9l8l+BcL
/oOCPz3a2/+M5s/h/L8J/rwYb/9Uwb9R8FeK9fb3EvyPC/4Dgr+l3dt/k+B/y+Of
zj05CTxP7k6jjtxluDMMd5m+bYXZWxqSk4HWxvQ2WPQn5A+9KkLRHUAlhAxUKxig
GcyAOP+NiEn6xrvb4G/wRgWEJhVak+ZR/CsaGM17ihBuTuqLCJp3H/3cbN6ZXPNm
P0pMsOZNFwIDI6zm7Yn1bd5Bqpcn1qpexa4sxb+CVa+pQrhVvazq5YPiX8GqV3/P
zbBFjZt/bJgR/+LlrRFGFyV8JycL5gObdBkeWKoKFb7VCwhSSYozxBmSPvCuJKwg
pnESgPdazcqY4rUzVhChFEdYBVH6rYUVxG26z4SyBXG77jPR291Dxxo/TSNwQZg9
b3CEVRDFaRpiATDIC+IO3WeiZDWizAui7GrEdN1nQsGCOEf/WY6fJaAJ1NVVrRGi
4RRcSuiBNvX0jQEjxgAfX0ffytABUxQGXEVQAHKQC2I/cUxITkm9Jvaoo1vyT066
WeJ04gflHQaBr8gCQs0y4V4RAhfpi8dhXb6swUqN+SlDp1d4VTIx4A93+VjOeMjg
ctMySyA17flJyxJaOtvYr066OyFRK7N2SU8k1HNGa+N28csMW1RlD75sgMZFDxBs
5di0H+027Z5t2oCt37l2Swclcxu2SbN0T5cXDl3/U+ukmFi6XSbFk1rpJ2i1K0pj
V40M0UIGROtNwNhIw0mCpKSbeBrdYyTDRlWPsd2kI6rIiwXNPdAmiUfMzIjZiJUB
SXk3I3olrmEZY4IKGfDgp7UMojyDEQ1XPD+lFZbuGmJG+AY30Se9brgb0JCpSyfC
9Jy6Zp5RpLE7XS/CDtF9bRn6WTo5JyqcpiDcuRfMpvBiwpjEC5NbOrclzE08JznR
uTZhcmJ6ckVsClW0O8C+oHdT6H3Cc5kHL53z2ubXu2xpTX2HhaawePFSL7fOmmi9
KaBEStoUsOuqo7Sagr8WHImmoBWQeH5KKyxPU2BhJW0KX9hfiKJN4a3oCdFl1RTi
yZ+xByphJD3HnuikI2mik46kFacp0LmE+TRxJ/DRWuNu01Tn0S+KzkZY7THrldsd
TvkyzjKw8o0iv8X/n3O4Y21qlYRfnB0cD6U2S4hJTXfcmkpIVjQt35jGoZdvVnSM
+b5GmUEsX1oPAVqCPFgJ8LMZFleVtNQZYpEfKezTjjE6T7zoATQrwjiJlytsWIvZ
YARr5a35yFVXDh0/vLAFcRHkQ+/Bpi8dJZA9aShd5O4g+2Lwi57eWYzWWdnJDdrZ
CO0YqR3Nwnq6uJKm7wuz9WAe2s3e0ol5aJodc6q+iXAxgzizWk//09J6ZsfsdkyL
vdu5JiY6sV9soXNrTPXEi2M7oXeyGeU7oBjlayMD8ALa3U76ItpubSCYFmu6CF+j
hRcabrT2M6ZfrOkifKsWjvzhVtfCL441XYT7li9tPXdEh9t6apyiraexFidrPXix
yAaLEEXsyua6fYj2w28cNbZw3ODCkYMLXUNHji8cOW7o+Jtdjduk9UhrEn6jOljG
jSqK7I13OSY56ibGJrRz9HScdNRMuNpxkWO/g3voxegy0/lX3MoM8ocOhPfQZxgP
fZafh55J5F0mfeFSfLopBE93ZW55eLrDUnYl9ak0M2VWysmk3EpDU55OOTu5VqUr
tFvMDGNAzNQGxD6VCNmlVWC4M7V0hqWYLsJztfCThjtUC5uVYroIr6WFn51MXdzH
0ymmi3B/T/c+R7hP90ljQHydyAdEzOgxn+efLhZbemcYI2JDgozo1Nm38dr1W/P/
kMt6XEwhdvuBSp21cbGpNhbiqGw/UqmtvZ5WIlFRxR8Xo+gFZQzxIdNHBCwk+YT+
os8yXH+/QADPLyRC01zowvMxKLTB1eGUeyCc2eWOn48od7jhlzuuLv1yP8ddVKR3
17Zp+r01xe9eJIEJ1G3EZfelx8NfOA+IMDn8Oi8qKiI7duwgAwYM0P1wDx486PUL
viLInInwxzWU8ihvMhYsWCh7/FIUQ+gwdYi4o835I2aEQQcHCxYseOEQccaYU1iA
tSJ/I10oo6ElY8lYMhVXxhxbMdKysdWfdCgpWjKWjGoyZivSHKsVWTKWTBgyZiuK
IdbvPAsWwoHZirANZrUiCxaKD7MV4e0BqxVZsFB8mK0Ib2lYrciCheLjF3eR+3bP
yx/zPWdLPIphdEV/qf7dL63B+bzAT/3uNqYEXgrh32KhL4lscHeLfymKGvx8UnMb
V9cNfs6DwU/nxryY/MN1nn/4/rZ7N5w1xr7pu++yl7Yd1q5dU1ujD1e9+mPlL6p/
3mz0RPvI9e7pE2MXFV3wXcLE6P7T0h9ds/WDb2/cdeW8bjWarLrp0O4tx1tnrev5
+qiv99Roe/3k6Cf+iu+S9u7fc759uOac/1t17rhGI9Y+kbj7yOi90Sd2pt78xR3j
+s6fOvmV/Jb3TUoeOj4nZ9fG/304dvLjVUZVfe7hqY7KzbPHnv1mvaF7z6txy6ML
Zw3+jQzrva5+/IXndX34vFRXu4x/x485mHj9NzEF38cVXv3tlw+k7t43/P19w38Z
O6v39d8tfblf5XuWLKwxfWHO0mHvj9nSqeHT4xoO+/KGL49uG/pQq0ZvOY/Gfdqy
baXZVW/s3avR9itbuFfNW75kaeNX513w7csvvn39OT91vPn8hdcebRnVofF3o+Y4
qx1745IOTW9pX+PeaVtffyd/RczEHmsdjad2Pt7//gcfuOGvncfOu2bQySmZK5af
O+hkt8yWNfZfXJC74r0pscuP1X718ZT+A++v9u7JV5puvfrKLfdm777h/7J3t7l7
c4vNt27559bKA/5v2/DFnVIvq5JyeGvVXzcseHjxBzlXbD00IvmqV6587pc775zZ
8N/o5296YWavh7rfZh/dJ2XYgiHLeq+Z1HTtHZPO7fvaJNK/6O17H3ny7ceWX9D5
t6rnT7n0+fRb6o6ZU7jm6s+fXLVj/BNHh984e/hrx99v+uBDl/xvonPKsxs35V57
96APnv3kGvvWh+ft3vbEH7cOXtSk46p7fnjvoS/nDhqZNmjcoIev/OCSqh+vueSb
hn9P/Dn373Ejxo4+PHR+7hWrhu3a9+uB/e/kPjelZc+3pz7fqfMdkzbePOeKhScf
/+m5PVd89sINK5a36p69ZtKaSfauS779YvNn3d9e8vyxXl+0Ir0GHL7vzW/qXLjh
q/pN1y/+oMPzNze78YFva0x7eHne2NW1dkz6dPZ3XRq1mv9+zz969rju+JXX5ued
jP104S8TeQObiVpdR23PyNVf+BxHLBObQeBGMaCMAGpis6m9b2JmcqIz0XgDrj3J
JHW1LsJJ6DuV55NwTGw+/RRwhdvwmnHEfBmMheNRsTBqYpNtWlL9IXoR/vApmSY2
8TYhM7GJd+UYCrhzbxObvBTAcmfgr5TFmyY2WYdsmtjEm6b4wrDMvGV9N3WZsap0
zk/NXN1pQ2qPRt1FZrAUrqpZ8On814wrgpvYvEtP4bGoe8i90nsIbmKzlc7oPjKT
zCKlZ87SMrEZPF1eby94upAWzVPCDS0vnnXwvEJPl2m9A8HThbTIAfKh5cWnHDyv
0NPF3TAETxfSomlHILS8eATPCwgt3ZLVJXaEllf5rEs4Qn/m5bMuMdnQ8uIRPC8g
tHRLVpcgG/ozL591CbKhP/PyVJeoYZZHDUFz5rF7/YKJPbNv0/0lMbGpq/sFAHJn
CNlIWlATm/W0eWq+XlbUP1PwHxP8A2ze/s2CPzvK279I8MdHe/tf1fwFnL9OjLf/
XsF/VPBfE+vt3yT4M+3e/sc8/iAmbUrfyJFlJM4/mN2ju4RwywahVb18UPwrWPWa
IYRb1cuqXj4o/hWsej3muRnFTVzew0kAJTNfV4EtO96r+0woWxD36T4Typq4nKn7
TJSsRpR5QZRdjZil+0woWBDUxCUo4gDKysRlWuwnjrSUH5zdYo86HClvO+lmhWXi
0hemXb8m9m1JjyW0dHay/5k0MSHRmWP/OumBCmnisqp2B/lEtOv3jWxuY2ySXPHD
1nbTG+8PYuJyE3mCUBOX7bWaO4TA5qLeBDzWE0K36+eZSUYVebGguQfapPCImRnB
Rx+QL5AUa24MuBLXsIxLatfPOPjzU1ph6a4hZoRvcJMS2PVrFr3WMHHZnvxkC6cp
CHfuBbMpvJEwJjEjuaVzb8LcxOTkROemhMmJDSqkicuztDso8GkKl0pMXM6bPeeX
6e73WlNfMBOXNf+fvfMAjKLa+vhNlWxIWBTpJTZEpcNDRGSDFeyC0kQEAREFpIti
iVjAAoINaYpdUBALiKKCWFHQp6AoKE1FVFDEp66K+M1/7kz25szZZAnZ+YAz//fi
5dx79p75zc7dmTl7MtmAL9HxiMs9Xwr41tNWWS2FeCvYj6Uwk3nEpbWzCpeC27en
S2FJ5rA0vRTWpL2etKe9lrPOpN9V0GfS7LA+k2aH9Zl031kKiT2kb9r/y0P6tpd7
MDwwNKFipayl4fahyyvWz1oTbhLqIOoRl8udxxYtUfwTvVDcwD2vbe9/xGVr6zq0
Y2ajcE/rOrSR/VipC7PR7n+PuJz+/7J6JqevD43NuC28KD0tu3dG3/DK9BrZZ+zR
Iy4np+tHWaLFoy3HZsRa9C9K14+yRItHW/bOiLXoX5muH2WJFo+2PCMj1v7/POIS
hT371SMul5arHpoaqpm9uVyb0MhQNLSrXKdQj9CGUOnfdDtAUsW/6VDp3vQxJTzi
spVyHoJY4L5SPwTRKXmkb2+uwtsbPONyX3nGJUrtgmdcFv7sHc9axH481mnj3YJA
hbdISs9Z9FmLeHVp9ntx2r/3O+4fsd/Rln6/49Vlv9+DZ1yW2md/VDzWRPbH3uYT
KFCg5Ct4xmWgQGWn4BmXgU/gE/gU9QmecRn4BD576hM84zLwCXz21Cd4xmWgQHuq
4BmXgQLtqYJnXAYKtKcKnnEZKNCeys9nXM5VK8rpUh685k/DoyR5ajbMDs+gI84H
LfU3x8zfjOB8/ZYnvtnhGXTE+XAw5lgA7tjU12954psdnkFHnA8HY44F4I5Nff2W
J77Z4Rl0xPlwMOZYAO7Y1NdveeKbHZ5BR5wPB2OOBeCOTX3LSnNVlUP1Jc1hyrmk
GYVflPaKbgG1WUwqzkfD8ZOjtXfFKH0Vx/mWmRxwtwLEFY1HbRaKivPRKPzkaP0G
p4XbNB61WSgqzkej8JOj9Rsc1/ymaDxqs1BUnI9G4SdH6ze4e7PkisajNgtFxflo
FH5ytH6Dmx+vEI1HbRaKivPRKPzkaP0GR8LWFI1HbRaKivPRKPzkaP0Gd55KWiga
j9osFBXno1H4ydH6DW7+hgtE41GbhaLifDQKPzlav8FpnofGozYLRcX5aBR+crR+
gxd9QJKXhdosFBXno1H4ydH6DU6f40HjUZuFouJ8NAo/OVq/wfE7a6ZoPGqzUFSc
j0bhJ0frN7j9i7aGaDxqs1BUnI9G4SdH6zd4Lumm8ajNQlFxPhqFnxyt3+DGg91s
0XjUZqGoOB+Nwk+O1m9w+zkRhmg8arNQVJyPRuEnR+s3eEXSTeNRm4Wi4nw0Cj85
Wr/B8Uv9pmg8arNQVJyPRuEnR+s3+EGkm8ajNgtFxfloFH5ytH6D08dC0HjUZqGo
OB+Nwk+O1m/wwse9OaLxqM1CUXE+GoWfHK3f4JVJN41HbRaKivPRKPzkaP0Gr0K6
aTxqs1BUnI9G4SdH6zd4VdJN41GbhaLifDQKPzlav8GrkW4aj9osFBXno1H4ydH6
DY5HpUFutpXGozYLRcX5aBR+crR+g9dwTHHgKCSCxIHjGXKQOHA8SQkSB17HMcWB
5zmmHPCoBnfnx9fFTTesbUPjUZuFouJ80FJ/c8wGj+oHFnK+e6o/Tr/x7Mxr10Zo
fzx54psdnkFHnA8HY47Z4EY/9S0rFV8coo84LboF1GYxqTgfDcdPjta3g98BRySR
4FjtIsFRHCISHB+rIsERTyQ4ikNEgqM4RCQ4ikNEgsceVq9F41GbhaLifDQKPzla
v8Fjfy9Li8ajNgtFxfloFH5ytH6Dx/6KmhaNR20Wiorz0Sj85Gj9BkdxiEhwFIeI
BEdxiEhwFIeIBEdxiEhwFIeIBEdxiEhwFIeIBEceTiQ4ikMQTU6m3QFHcYhIcBSH
iASvqoSCozhEJDiKQ0SCozhEJDiKQ0SCozhEJDiKQ0SC11FCwfOUNPCoBsf8iIav
ixeX+3X/LQ657s/HNlTptS5C++PJE9/s8Aw64nw4GHPMBjf6qW9ZqfjiEPNZEnQL
qM1iUnE+Go6fHK1vB78D7h74rmg8arNQVJyPRuEnR+s3OKBFgqM4RCQ4PlZFgiOe
SHAUh4gER3GISHD6GFQaj9osFBXno1H4ydH6DY7iEJHgKA4RCY7iEJHgxl+7tkXj
UZuFouJ8NAo/OVq/wVEcIhIcxSEiwVEcIhIcxSEiwVEcIhIcxSEiwVEcIhIceTiR
4CgOEQmO4hCR4CgOEQleVQkFR3GISHAUh4gER3GISHAUh4gER3EIwOV8Y+6AozhE
JHgdJRQ8T0kDj2pwzA9w/Myf9Nf+Wxzy6M4n727RYX2E9seTJ77Z4Rl0xPlwMOaY
DW70U9+yUvHFIebf26BbQG0Wk4rz0XD85Gh9O/gdcEQSCY7VLhIc0CLB8bEqEhzx
RIKjOEQkOIpDRIKjOEQkOIpDRIKjOEQkOIpDRIKjOEQkOIpDRIKjOEQkOIpDRIKj
OEQkOIpDRIKjOEQkOIpDRIIjDycSHMUhIsFRHCISHMUhIsGrKqHgKA4RCY7iEJHg
KA4RCY7iEJHgKA4RCY7iEJHgdZRQ8DwlDTyqwTE/wPF1cYvN8/ff4pCpB9z1yjuv
fhah/fHkiW92eAYdcT4cjDlmgxv91LesVHxxiFsVBdEtoDaLScX5aDh+crS+HfwO
OCKJBDfr4CAaj9osFBXno1H4ydH6DY6POpHggBYJjngiwVEcIhIcxSEiwVEcIhIc
xSEiwVEcIhIcxSEiwVEcIhIcxSEiwVEcIhIcxSEiwVEcIhIcxSEiwVEcYt6h0XjU
ZqGoOB+Nwk+O1m9wFIeIBEceTiQ4ikNEgqM4RCQ4ikNEgldVQsFRHCISHMUhIsFR
HCISHMUhIsFRHCISHMUhIsHrKKHgeUoaeFSDY35A4+vi5+rtx08OWf3NbbUqnxI8
OUTxxSF0KwzTY7OYVJyPhuMnR+vbwe+AI5JIcKx2keAoDhEJjo9VkeCIJxIcxSEi
wVEcIhIcxSEiwVEcIhIcxSEiwVEcIhIcxSEiwVEcIhIcxSEiwVEcIhIcxSEiwVEc
IhIcxSEiwVEcIhIceTjElJNwdsBRHCISHMUhIsFRHCISvKoSCo7iEJHgKA4RCY7i
EJHgKA4RCY7iEJHgKA4RCV5HCQXPU9LAoxrcjYmvi9ufkxuh8ajNQlFxPmipvzlm
g0eTVxwycnPeQd8v2xih/fHkiW92eAYdcT4cjDlmgxv91LesVHxxCL5KdEW3gNos
JhXno+H4ydH6dvA74IgkEhyrXSQ4ikNEguNjVSQ44okEB7RIcBSHiARHcYhIcBSH
iARHcYhIcBSHiARHcYhIcBSHiARHcYhIcBSHiARHcYhIcBSHiARHcYhIcBSHiARH
Hg7gchLODjiKQ0SCozhEJDiKQ0SCV1VCwVEcIhIcxSEiwVEcIhIcxSEiwVEcIhIc
xSEiwesooeB5Shp4VINjfoDj6+Lj12/cf58c8vG3b1753fFfRmh/PHnimx2eQUec
DwdjjtngRj/1LSsVXxyCb9Rc0S2gNotJxfloOH5ytL4d/A44IokEx2oXCY7iEJHg
+FgVCY54IsFxVhcJDmiR4CgOEQmO4hCR4CgOEQmO4hCR4CgOEQmO4hCR4CgOEQmO
4hCR4CgOEQmO4hCR4CgOAbic9KMDjuIQkeDIw4kER3GISHAUh4gER3GISPCqSig4
ikNEgqM4RCQ4ikNEgqM4RCQ4ikNEgqM4RCR4HSUUPE9JA49qcMwPcHxd3Lnn2/tv
cchnU/I3h575PEL748kT3+zwDDrifDgYc8wGN/qpb1lprlpRTt+b4bsUuzgkQXm2
yOzwDDrifDg8c8yvXZGoPPHNDs+gI86HgzHHAnDHpr5+yxPf7PAMOuJ8OBhzLAB3
bOrrtzzxzQ7PoCPOh4MxxwJwx6a+fssT3+zwDDrifDgYcywAd2zqW1bS9a64pDHr
XY8r6mSLbgG1WUwqzkfD8ZOj9e163gHXkWKi8ajNQlFxPhqFnxyt3+C4gTFF41Gb
haLifDQKPzlav8FR72qKxqM2C0XF+WgUfnK0foO79+quaDxqs1BUnI9G4SdH6ze4
+fEK0XjUZqGoOB+Nwk+O1m9w8xkDEI1HbRaKivPRKPzkaP0GR4bGFI1HbRaKivPR
KPzkaP0GR72rKRqP2iwUFeejUfjJ0foNjhyNKRqP2iwUFeejUfjJ0foNjnpXUzQe
tVkoKs5Ho/CTo/UbHPWupmg8arNQVJyPRuEnR+s3OOpdTdF41GahqDgfjcJPjtZv
cNS7mqLxqM1CUXE+GoWfHK3f4Kh3NUXjUZuFouJ8NAo/OVq/wVHvaorGozYLRcX5
aBR+crR+g6Pe1RSNR20Wiorz0Sj85Gj9Bke9qykaj9osFBXno1H4ydH6DY56V1M0
HrVZKCrOR6Pwk6P1Gxz1rqZoPGqzUFScj0bhJ0frNzjqXU3ReNRmoag4H43CT47W
b3AkIE3ReNRmoag4H43CT47Wb3DUu5qi8ajNQlFxPhqFnxyt3+CodzVF41GbhaLi
fDQKPzlav8FR72qKxqM2C0XF+WgUfnK0foNXI900HrVZKCrOR6Pwk6P1Gxz1rpCc
yigHHPWukDhw1LtC4sBR7wqJA0e9KyQOvI5jigPPc0w54FEN7s6Pr4vv7VcrQuNR
m4Wi4nzQUn9zzAaPJq/e9euXHpqw45mvI7Q/njzxzQ7PoCPOh4Mxx2xwo5/6lpWK
Lw7RR5wW3QJqs5hUnI+G4ydH69vB74AjkkhwrHaR4CgOEQmOj1WR4IgnEhzFISLB
URwiEhzFISLBURwiEhzFISLBURwiEhzFISLBURwiEhzFISLBURwiEhzFISLBURwi
EhzFISLBURwiEhzFISLBkYBENDmZdgccxSEiwVEcIhIcxSEiwaspoeAoDhEJjuIQ
keAoDhEJjuIQkeAoDhEJXkcJBc9T0sCjGhzzIxq+Lh61qn6ExqM2C0XF+aCl/uaY
DR5NXnHIqY+1yLpr6rcR2h9Pnvhmh2fQEefDwZhjNrjRT33LSsUXh5jPkqBbQG0W
k4rz0XD85Gh9O/gdcPfAd0XjUZuFouJ8NAo/OVq/wQEtEhzFISLB8bEqEhzxRIK7
f//WFY1HbRaKivPRKPzkaP0Gd5/t6orGozYLRcX5aBR+crR+g6M4RCQ4ikNEgqM4
RCQ4ikNEgqM4RCQ4ikNEgqM4RCQ4ikNEgqM4RCQ4ikNEgqM4RCQ4ikNEgqM4RCQ4
EpAiwVEcIhIcxSEiwVEcIhK8mhIKjuIQkeAoDhEJjuIQkeAoDgG4nG/MHXAUh4gE
r6OEgucpaeBRDY75AY6fSlcdHqHxqM1CUXE+aKm/OWaDR5NXHFLj2syrN034JkL7
48kT3+zwDDrifDgYc8wGN/qpb1mp+OIQ8+9t0C2gNotJxfloOH5ytL4d/A44IokE
x2oXCQ5okeD4WBUJjngiwVEcIhIcxSEiwVEcIhIcxSEiwVEcIhIcxSEiwVEcIhIc
xSEiwVEcIhIcxSEiwVEcIhIcxSEiwVEcIhIcxSEiwVEcIhIcCUiR4CgOEQmO4hCR
4CgOEQleTQkFR3GISHAUh4gER3GISHAUh4gER3GISPA6Sih4npIGHtXgmB/g+Lp4
43//aUPjUZuFouJ80FJ/c8wGjyavOGTX2/0r1nxlfYT2x5MnvtnhGXTE+XAw5pgN
bvRT37JS8cUhblUURLeA2iwmFeej4fjJ0fp28DvgiCQS3KyDg2g8arNQVJyPRuEn
R+s3OD7qRIIDWiQ44okER3GISHAUh4gER3GISHAUh4gER3GISHAUh4gER3GISHAU
h4gER3GISHAUh4gER3GISHAUh4gER3GIeYdG41GbhaLifDQKPzlav8FRHCISHMUh
IsGRgBQJjuIQkeAoDhEJjuIQkeDVlFBwFIeIBEdxiEhwFIeIBEdxiEhwFIeIBK+j
hILnKWngUQ2O+QGNr4v/bd4iQuNRm4Wi4nzQUn9zzAaPJq84pNpPj//00DubI7Q/
njzxzQ7PoCPOh4Mxx2xwo5/6lpWKLw6hW2GYHpvFpOJ8NBw/OVrfDn4HHJFEgmO1
iwRHcYhIcHysigRHPJHgKA4RCY7iEJHgKA4RCY7iEJHgKA4RCY7iEJHgKA4RCY7i
EJHgKA4RCY7iEJHgKA4RCY7iEMSUk4VzwFEcIhIcxSEiwVEcIhIcCUiR4CgOEQmO
4hCR4CgOEQleTQkFR3GISHAUh4gER3GISHAUh4gER3GISPA6Sih4npIGHtXgbkx8
XXz5ipMjNB61WSgqzgct9TfHbPBo8opDvho6seWcKVsitD+ePPHNDs+gI86HgzHH
bHCjn/qWlYovDsFXia7oFlCbxaTifDQcPzla3w5+BxyRRIJjtYsER3GISHB8rIoE
RzyR4IAWCY7iEJHgKA4RCY7iEJHgKA4RCY7iEJHgKA4RCY7iEJHgKA4RCY7iEJHg
KA4RCY7iEJHgKA4RCY7iEIDLybs64CgOEQmOBKRIcBSHiARHcYhIcBSHiASvpoSC
ozhEJDiKQ0SCozhEJDiKQ0SCozhEJHgdJRQ8T0kDj2pwzA9wfF38Sr+aERqP2iwU
FeeDlvqbYzZ4NHnFIeENG07/486vI7Q/njzxzQ7PoCPOh4Mxx2xwo5/6lpWKLw7B
N2qu6BZQm8Wk4nw0HD85Wt8OfgcckUSCY7WLBEdxiEhwfKyKBEc8keA4q4sEB7RI
cBSHiARHcYhIcBSHiARHcYhIcBSHiARHcYhIcBSHiARHcQjA5eRkHHAUh4gER3GI
SHAUh4gER3GISHAUh4gERwJSJDiKQ0SCozhEJDiKQ0SCV1NCwVEcIhIcxSEiwVEc
IhIcxSEiwVEcIhK8jhIKnqekgUc1OOYHOL4uPn/1KREaj9osFBXng5b6m2M2eDR5
xSFjzv5wyA+vCH5ySIdyF6Qp1W1krwGnWG2XjtZh1mPb9HMGrcyv9M6T6RNnnnh+
g3/7d97aUuXdcdYnE8esGjfu5NROk+5Z+H14de6EjKzVG1JP2VR1a5fn2k5Xz/X8
4OByzaqtPfOd3k/mnHnZB51njdg5ete6OyMfvdDglGc/7bxg9K3hHfPObvfyd3c2
nPfRXZdf+PYhtZrf0bbnXe9vLTj67xM+SL3yi4c2Fbx+1LyPTrltcesZm1v3H93+
8IvG3/PZjLl9v5hxdru1r904/c8jOz9f/ozTb3325D4Lly+Yv+L0x7sOaDyr77Zz
Vw/8e26dt9ovnLjikh0dR7yaW+WiDw78z99X7Rj+Q8+vCkY+n3nhsurPXDn24YNG
dW3V5PPc36ILqg68+sH/HDr64FZvNj7m7VFHZwwYu+2aj9u/eNFzD03766YtV554
1W2NR6x7eMKlR1ed2OPMzu1erPdS6qLFV3Sd02P1ykbf/jJq+jM3tLmx3SnHr101
7JOPXvv75Jajb79y5UHTzj+l7uS6o26r8O1fGztW/+mza3+4ZWq/rWNHf/9cy0bP
Zl9/9sb1f76+9OXF1+a2Wn/XEauf+f3UttP/aDB0zEc1al47qfttj3645I2cwUdM
aJV2wLFL7mv5Q/maX6rOm55qNnhwWpzBlz4eEu3RZNsBP0U2bLhhyjFDVlVruTBl
7lvn9duwIXPhgafNuPGmGhtOrzkiM3dQAT9Y7cJ1P46aVKvzDede/+U1G198c/i0
rydfcN6ED/q8UvPK085aVePwH96v/2fbd7N+2PjeiPpP/+eLjxcMv3th23tve/bd
TaERX7Wb+sVJDf4YM/eKm6+es+L535849fiq2+Zf+8+8NX/u+H1lux+ev+vPE1e8
3fWY+mtO6Npy7OjbRm78qcnGqxf8uvW4K98b2Gnb9dce/scvvV8M3dNs0wFdOy3L
PX3XuaNaNRv9yfj6L/65+cnOk86df91dM9qNmrmyffU/b1mVlRoZ9urJzfu339Wg
1X9HvN5qzrJFbz1/ZpOO3S/qtXlz/TmXXPrh+9GT15113wHvnzyj0ftvdZ+y9efF
Dz15Zp8vLnm/z9drdyxv2nXnC10q13666XEH/vTPsml3tt7y7/cP1m/9zOgu1v+6
vnDj6MGNTnpqyM+/Lv3qnlvGjvj5oXV/PDD4lm2tf7n42Mu2tFo7fOI1bWsduHHz
+FEF0Q0pv34y6I+payp+89tjHXfc0OHxznWHfXD100sPbjOpc5cv/s1ouuTMkd36
DupzYP6BBfgALa+y7C8qWzRu0LvvgAHDVEjVsz7KW1nrbZJzZsHqRro/Wat8XxN2
A/YRdJBqbP336MwLs5vmZIfL2/soRdVXTdXBKse68UpR5a29eKJ1rupj/TvFrvRR
6Q+qMUon1DENXjMe35Lbdj33H2rC1y2t/5+a75ixMRX71HX7zVNQHyt6U/sVWkvy
3RfhP+ZMlewv59GDjGdl+0YxVR3vuEOtjX/PVO2UPuvix/SC3OiuzFdy45PsLw0x
k94i5ODcHiSlkJ+pUiS+1uH5ut3unBZbGXY5XBaoE1MwW7/Uu9U9zgxrr3v13ZTb
33Fe4b5SqRXLoZhdXs2zj/mT7BkuS71P3c9uQ9f8+Lae4RSbaLJ6QE1Rj6uTla74
KU50/1DBJzZTeeP9paKvpIJP2W3TnAK8a+bWzLKOf31Z6vqUpKdUntLvfHFKbF4U
H7gqeV54z8kvyoA2sVgmdcmxEp8XdQSuSp4X3pQB/onFMmcuOVbi82JrXJU8L7xN
BpcjsVimSo4FJTbvnh1L7k9isfbOYwk/ib/ne+ex5PomFstUybGgxObds2MJvom/
53vnsQTfxN/zvelYOqLgVoUrCt0Xu/L4YejfN5W/b3ykQLnXHppa7//G6lLdpWKv
ibWphXEr2dddxQnRXV1lEzawfn5Rhxb2Yj6iiDu606Ywj4kj7eOrsrW/jrf3lba7
EHsasdcROy+lqN2b2E8Qewuxj0ktag8i9jxi/0rsFmlF7ccsu7Vhbyb2UelF7QHE
nkvsX4jdPKOoPZLYLxN7J7HbZBa1byT2W4X2LcY7y6jwnb3VOYbGOu04p52jjlH6
6q4hpuOkj9bGbRva7Q77UEVtNoSDFD6oBnCFe0RXGIu/yFxP73h+W/y35EUHJeaV
2JI3tfuvOMJZ/neT/thFf4HC8u9m/zu2/Jsay9+9aYnJXf46e1i8SrX8C0e9y7+E
w6twNDi8dvtg2f1XuIfXPaQ/OLyCw8uj3X+Fe3hdVrgxbtLj6u/rNin3zJkR9Omk
hffiZeoUaJntYwqprETlPbygEg6S3TnFOZ4eFT1I3B1xn+EBFc3lzEvfvXXm7ohE
dkepdkTZrxZ3R9xvWzGJ3RGTbSumrvkX2JofZ2kUvyNin7wlq1Q7YneWBt0Brvgd
8YBtxbRnR0TSd0TyjogpthWTwB1R1b5txw8woUPt6mDcqFj6F60Gmtj2MPsG1hlx
ZI4fYn/VYQu/PeEorwA1KyHVOuPj0NU5uRV7ZvwWuiDnh7D+MiVsvWS7utkBWKum
Kv2bhNhW9KDF/PRnu+2fbLl7zbU1YbhIfyU1yq61jCf+XO5ycMrL1/ssS9XMvKb8
vKxG4fzMB8vfmZUdrpd5a/nHsg4Lp1nn7d3fZ/gKK/ky9w1Ur2CiQhIixbqJT7G2
OcU6Ydtbbm3SD8y1jfslzprpbe7ZOGFLpHx6hv46jdXk6lOt/RSyZqyvDlZ9rJ5u
afYScL5owz+ymD19VOGim66apOhqWXwdZSu1oAiFjl7clyiFbrFAsPQb5JX+Zqeo
8Eq8xg2MC1QsLnCYl7WuqL8rZxgt/fe/1s6yW8fN6V+Sr+yL3ny0S7CQdasvhPW/
dRuLmarq5Te2d+GZaQekNrH/VV8dklqapUC2vIhiS2F21pDsNjmNwh9m3ZddPSc7
vCDrOuvjY19cClWsLWjtWQrddxa+rFDvlvvsqZ/v+DKire1kKcyc+ViRttazVe2l
kFYGSwHfytoqq6UQbwX7sRSsHUT//a+1swqXgtu3p0thTebraXopvJK2IS1ZS6Gc
+iXjuwo4kx6cmR3WZ9LssD6T7jtLQV9LxN5NbAksfdTktz3a5uiXqq9G3KMndlzl
55dm/7rMnNz9m6q2l3svPDC0sGKlrK3h9qF7K9bPSq/YJHRtRaWapen9m14v8f3b
LC09Vs+RNNH9q49DSO9BU+4eMK9m3LFKqpFNuF3pY/ob62eIzdnc8TimAL8viOKL
FORiljjd1v62LNXl/P7DB/RtoPIU4uhtSLFXeJba0BB7F9FD6pt03NHrLUu3Pqwy
1RXWvwaqLWqQ1R5TqncXr9TzexVbPbgO7ZjZKIzr0EbWysF1KNrU/W71XPb/snom
p68Pjc24LbwoPS27d0bf8Mr0GtlnZJyFT6cUZ//23I39m6J6TrY25Dbr9WjXWyeC
sRmxFv2LrP6+Tptm3cb0zoi16F9p9SM+2hpW/xkZsRb93v2rV8/NaaVdPTX/1aun
njXGrR4UHqXglxgK3FfWt3+l4dQBI64c2ndY776DevfN6z9oeN9Bw/oPvzqvXtuG
FzQ8au9dVKlqabm80NTQodmby50cGhnaFdpVrnuoR2hzqPRvuh0gqeLfdKh0b/o4
502fEOdNP1HhTT+gyJuO23GnJJO+vbkKb++8FnvD23t57pry3SqMz52Qu6t8iwr9
c5/IrZxTu8J51iY2LcUZsal1RuxWwbpeso5gtOOteS7PjbXob2H173La/lbfhNxY
i/7aVn/lHN1iO57IjbXoj/f23hkq7dv7iHNGfEXxZ0SUAtpv7xKn23l7uzZxTol1
FQLpa2fv6s20Ny3+m6zfquS9ybkqM/O7CmdbJ0ZcTuLnwMxfK5yYeZi1R1JTd//E
mKpfkGTRN1m/RdAM1VLpW/pWThvvFgQqvEVSes4ZeXh/HIS2eHVp9ntx2r/3O+4f
sd/Rln6/49Vlv9+r5hcU2J/XKTfa23Y0bnwxBa6gxqi8TC+eqXj9puDi+uH2vKCg
QK1atUr17NnTttFu2bKlyC38vuCzPyoeayL7Y2/zCRQoUPK1tSBd6dPUNpWfFrt+
xBVhiSeHQIECFdE2FU6PXcJC7iqKd6ZL5GwY+AQ+gc++6xM7t+JM655b43knMmPg
E/hI84mtIqsJVlHgE/iUwie2itJVcJ8XKFBpFFtF+BosWEWBAu2+YqsIFVfBKgoU
aPcVW0Wo0ghWUaBAu6+t+QX5NxUWf0wp/Nejhb8ZpjP6j9nPqrYWnKeCX9v5bWMe
KAoxq1h0kciS/Llqdo4u5clVzt+QTVCemg2zwzPoiPNBS/3NMfM3Izhfv+WJb3Z4
Bh1xPhyMORaAOzb19Vue+GaHZ9AR58PBmGMBuGNTX7/liW92eAYdcT4cjDkWgDs2
9fVbnvhmh2fQEefDwZhjAbhjU1+/5YlvdngGHXE+HIw5FoA7NvX1W574Zodn0BHn
w8GYYwG4Y1Nfv+WJb3Z4Bh1xPhyMOeYX+Fw19GB9v4Yf+35tFJ4C4RXdAmqzmFSc
j4bjJ0dr7wo//qaJA+6Wt7mi8ajNQlFxPhqFnxyt3+D0t1JoPGqzUFScj0bhJ0fr
NzgSGqZoPGqzUFScj0bhJ0frN7ibCXJF41GbhaLifDQKPzlav8HNj1eIxqM2C0XF
+WgUfnK0foPj2yhTNB61WSgqzkej8JOj9RvceSR0oWg8arNQVJyPRuEnR+s3uPnr
exCNR20Wiorz0Sj85Gj9BqdJbBqP2iwUFeejUfjJ0foNXvTpb14WarNQVJyPRuEn
R+s3uPt4PFc0HrVZKCrOR6Pwk6P1Gxy/kGuKxqM2C0XF+WgUfnK0foPbTxEwRONR
m4Wi4nw0Cj85Wr/B8e2aKRqP2iwUFeejUfjJ0foNbjy10haNR20Wiorz0Sj85Gj9
BrcfgqNi1+w0HrVZKCrOR6Pwk6P1G7yiY4oDxxNLIHHg+At4kBzwqAZ350cmZuOQ
/7Wh8ajNQlFxPmipvzlmg0eT9+d0Fz5Q+ejWE9ZFaH88eeKbHZ5BR5wPB2OO2eBG
P/UtKxWfd9VHnBbdAmqzmFScj4bjJ0fr28HvgCOSSHCsdpHgyLuKBMfHqkhwxBMJ
jryrSHDkXUWCI+8qEjz2kFstGo/aLBQV56NR+MnR+g0e+zsbWjQetVkoKs5Ho/CT
o/UbPPbXV7RoPGqzUFScj0bhJ0frNzjyriLBkXcVCY68q0hw5F1FgiPvKhIceVeR
4Mi7igRH3lUWeFSDY35EQybml+mb99+86+SMs45+cKX714pKlie+2eEZdMT5cDDm
mA1u9FPfslLxeVezApJuAbVZTCrOR8Pxk6P17eB3wN0D3xWNR20Wiorz0Sj85Gj9
Bge0SHDkXUWC42NVJDjiiQRH3lUkOPKuIsHpkwloPGqzUFScj0bhJ0frNzjyriLB
kXcVCY68q0hw4w/Q2KLxqM1CUXE+GoWfHK3f4Mi7igRH3lUkOPKuIsGRdxUJjryr
SHDkXUWCI+8qCzyqwTE/wPHz1Vez99+862HtRjy06MJPI7Q/njzxzQ7PoCPOh4Mx
x2xwo5/6lpWKz7uav4BNt4DaLCYV56Ph+MnR+nbwO+CIJBIcq10kOKBFguNjVSQ4
4okER95VJDjyriLBkXcVCY68q0hw5F1FgiPvKhIceVeR4Mi7igRH3lUkOPKuIsGR
dxUJjryrSHDkXUWCI+8KcJHPGQA4MjH9j6sVofGozUJRcT5oqb85ZoNHk5d3HXV6
5coNnvw6QvvjyRPf7PAMOuJ8OBhzzAY3+qlvWan4vKv5/Ee6BdRmMak4Hw3HT47W
t4PfAUckkeBY7SLBzc94iMajNgtFxfloFH5ytH6DA1okOOKJBEfeVSQ48q4iwZF3
FQmOvKtIcORdRYIj7yoSHHlXkeDIu4oER95VJDjyriLBkXcVCY68q3mjQuNRm4Wi
4nw0Cj85Wr/BkXcVCY68qyzwqAbH/IBGJuaTNRUjNB61WSgqzgct9TfHbPBo8vKu
N9zTpHm34zdFaH88eeKbHZ5BR5wPB2OO2eBGP/UtKxWfd6VbYZgem8Wk4nw0HD85
Wt8OfgcckUSCY7WLBEfeVSQ4PlZFgiOeSHDkXUWCI+8qEhx5V5HgyLuKBEfeVSQ4
8q4iwZF3FQmOvKtIcORdRYIj7yoSHHlXkeDIu4oER95VJDjyrogpMu+KmMjEtD+t
UoTGozYLRcX5oKX+5pgNHk1e3nXI37cc8v24IO+q+Lyr+dev6RZQm8Wk4nw0HD85
Wt8OfgcckUSCY7WLBEfeVSQ4PlZFgiOeSHBAiwRH3lUkOPKuIsGRdxUJjryrSHDk
XUWCI+8qEhx5V5HgyLuKBEfeVSQ48q4Al5OMcsCRdxUJjryrSHDkXWWBRzU45gc4
MjHvXrdw/32+64CaZ/64sMLqCO2PJ098s8Mz6Ijz4WDMMRvc6Ke+ZaXi8664WXVF
t4DaLCYV56Ph+MnR+nbwO+CIJBIcq10kOPKuIsHxsSoSHPFEguOsLhIc0CLBkXcV
CY68q0hw5F1FgiPvKhIceVeR4Mi7igRH3lUkOPKuIsGRdwW4nGSUA468q0hw5F1F
giPvKgs8qsExP8CRielQ75P9N+96/qwXWodOWROh/fHkiW92eAYdcT4cjDlmgxv9
1LesVHzeFfdsrugWUJvFpOJ8NBw/OVrfDn4HHJFEgmO1iwRH3lUkOD5WRYIjnkhw
5F1FguNyRiQ4oEWCI+8qEhx5V5HgyLuKBEfeVSQ48q4iwZF3Bbic1IQDjryrSHDk
XUWCI+8qEhx5V5HgyLvKAo9qcMwPcGRiHjyuaoTGozYLRcX5oKX+5pgNHk1e3jXa
7qQlzQ4I/q6W4vOuuHVxRbeA2iwmFeej4fjJ0fp28DvgiCQSHKtdJDjyriLB8bEq
EhzxRIIj7yoSHHlXkeC4jhMJDmiR4Mi7igRH3lUkOPKuAJdzo+qAI+8qEhx5V5Hg
yLuKBEfeVSQ48q4iwZF3FQmOvKss8KgGx/wARyZm8owX9t96181dXvj0+WGfRWh/
PHnimx2eQUecDwdjjtngRj/1LSsVn3fFFbwrugXUZjGpOB8Nx0+O1reD3wFHJJHg
WO0iwZF3FQmOj1WR4IgnEhx5V5HgyLuKBEfeVSQ4LmBFggNaJDjyriLBkXcVCY68
K8Dl3KE74Mi7igRH3lUkOPKuIsGRdxUJjryrSHDkXWWBRzU45gc4MjF/v/rf/Tfv
+s4tu/o9VCV4zoDi8664kHVFt4DaLCYV56Ph+MnR+nbwO+CIJBIcq10kOPKuIsHx
sSoSHPFEgiPvKhIceVeR4Mi7igRH3lUkOK7cRYIDWiQ48q4iwZF3FQmOvKtIcORd
RYIj7yoSHHlXgMvJwjngyLuKBEfeVRZ4VINjfoAjE/NT3T/237zr6+tnvPzVN+si
tD+ePPHNDs+gI86HgzHHbHCjn/qWlYrPu+J6zhXdAmqzmFScj4bjJ0fr28HvgCOS
SHCsdpHgyLuKBMfHqkhwxBMJjryrSHDkXUWCI+8qEhx5V5HgyLuKBMcti0hwQIsE
R94V4HLu0B1w5F1FgiPvKhIceVeR4Mi7igRH3lUkOPKussCjGhzzAxyZmPbzt+y/
edf10d5HzKr8VYT2x5MnvtnhGXTE+XAw5pgNbvRT37LSXDXbunapovSZ3M67JijP
FpkdnkFHnA+HZ475tSsSlSe+2eEZdMT5cDDmWADu2NTXb3nimx2eQUecDwdjjgXg
jk19/ZYnvtnhGXTE+XAw5lgA7tjU12954psdnkFHnA8HY44F4I5Nff2WJ77Z4Rl0
xPlwMOZYAO7Y1NdveeKbHZ5BR5wPB2OOBeCOTX39lie+2eEZdMT5cDDmmF/gc9XV
lfT92sEqVifTuqiTLboF1GYxqTgfDcdPjtbeFX4kKxxwHSkmGo/aLBQV56NR+MnR
+g2O7IwpGo/aLBQV56NR+MnR+g2OOhlTNB61WSgqzkej8JOj9RvcTUS6ovGozUJR
cT4ahZ8crd/g5scrRONRm4Wi4nw0Cj85Wr/BUSdjisajNgtFxfloFH5ytH6Do07G
FI1HbRaKivPRKPzkaP0GN/9MKETjUZuFouJ8NAo/OVq/wc2/zADReNRmoag4H43C
T47Wb3DzCWEQjUdtFoqK89Eo/ORo/QY3f30HovGozUJRcT4ahZ8crd/gZo0MRONR
m4Wi4nw0Cj85Wr/BUSdjisajNgtFxfloFH5ytH6D49s1SM5XyQ446mQgceCok4HE
gaNOBhIHjjoZSA54VIO78yMhkd6xR4TGozYLRcX5oKX+5pgNHk1euUiPSrPv7Pn+
jxHaH0+e+GaHZ9AR58PBmGPm/THnW1YqPv2ojzgtugXUZjGpOB8Nx0+O1reD3wFH
JJHgWO0iwZF+FAmOj1WR4IgnEhzpR5HgSD+KBEf6USQ40o8iwZF+FAmO9KNIcKQf
RYIj/SgSHOlHRJOTmnDAkX4UCY70o0hwpB9FgiP9KAs8qsExP6IhIXFqyysiNB61
WSgqzgct9TfHbPBo8tKPt79S44Vy/bZFaH88eeKbHZ5BR5wPB2OO2eBGP/UtKxWf
fjTr4egWUJvFpOJ8NBw/OVrfDn4H3D3wXdF41GahqDgfjcJPjtZvcECLBEf6USQ4
PlZFgiOeSHCkH0WCI/1of5vqdNN41GahqDgfjcJPjtZvcKQfRYIj/SgS3P27auLA
3QcbiwN3nywiDhzpR5HgSD+KBEf6USQ40o8iwZF+FAmO9KMs8KgGx/wAx8/46d0j
NB61WSgqzgct9TfHbPBo8tKPp/98xgOT7gmqHxWffjR/K5VuAbVZTCrOR8Pxk6P1
7eB3wBFJJDhWu0hwQIsEx8eqSHDEEwmO9KNIcKQfRYIj/SgSHOlHkeBIP4oER/pR
JDjSjyLBkX4UCY70o0hwpB9FgiP9KBIc6UeR4Eg/Alxk+hHgSEh0nNI+QuNRm4Wi
4nzQUn9zzAaPJi/9OKvVxH5HN/s+QvvjyRPf7PAMOuJ8OBhzzAY3+qlvWan49KN7
4EN0C6jNYlJxPhqOnxytbwe/A45IIsHNb1ogGo/aLBQV56NR+MnR+g1ufsZDNB61
WSgqzkej8JOj9Rsc0CLBEU8kONKPIsGRfhQJjvSjSHCkH0WCI/0oEhzpR5Hg5h+U
g2g8arNQVJyPRuEnR+s3ONKPIsGRfhQJjvSjSHCkH0WCI/1o3qjQeNRmoag4H43C
T47Wb3CkH2WBRzU45gc0EhI5Y0+I0HjUZqGoOB+01N8cs8GjyUs/bvj000kb530X
of3x5IlvdngGHXE+HIw5ZoMb/dS3rFR8+pFuhWF6bBaTivPRcPzkaH07+B1wRBIJ
jtUuEhzpR5Hg+FgVCY54IsGRfhQJjvSjSHCkH0WCI/0oEhzpR5HgSD+KBEf6USQ4
0o8iwZF+FAmO9KNIcKQfRYIj/SgSHOlHWeBRDe7GREJi5pPnRWg8arNQVJwPWupv
jtng0eSlH7uW/+avX5v/EKH98eSJb3Z4Bh1xPhyMOUYPO+pbVio+/Wj+nVS6BdRm
Mak4Hw3HT47Wt4PfAUckkeBY7SLBkX4UCY6PVZHgiCcSHNAiwZF+FAmO9KNIcKQf
RYIj/SgSHOlHkeBIP4oER/pRJDjSjyLBkX4EuJySMAcc6UeR4Eg/igRH+lEWeFSD
Y36AIyHR+tNjIzQetVkoKs4HLfU3x2zwaPLSj8e91ePqJ//aHKH98eSJb3Z4Bh1x
PhyMOWaDG/3Ut6xUfPoR92yu6BZQm8Wk4nw0HD85Wt8OfgcckUSCY7WLBEf6USQ4
PlZFgiOeSHCc1UWCA1okONKPIsGRfhQJjvSjSHCkH0WCI/0oEhzpR5HgSD+KBEf6
EeBycjIOONKPIsGRfhQJjvSjLPCoBsf8ALfTjz+eG6HxqM1CUXE+aKm/OWaDR5OX
frz91NVj+tUKqh8Vn37ErYsrugXUZjGpOB8Nx0+O1reD3wFHJJHgWO0iwZF+FAmO
j1WR4IgnEhzpR5HguJwRCQ5okeBIP4oER/pRJDjSjyLBkX4UCY70o0hwpB9FgiP9
CHA5ORkHHOlHkeBIP4oER/pRFnhUg2N+gCMhMXntKREaj9osFBXng5b6m2M2eDR5
6cfvX/r986GLtkRofzx54psdnkFHnA8HY47Z4EY/9S0rFZ9+xBW8K7oF1GYxqTgf
DcdPjta3g98BRySR4FjtIsGRfhQJjo9VkeCIJxIc6UeR4Eg/igTHdZxIcECLBEf6
USQ40o8Al3O/5oAj/SgSHOlHkeBIP4oER/pRJDjSjyLBkX4UCY70oyzwqAbH/ABH
QuLOe/bj6sd+2Z8PG3JgUP2o+PQjLmRd0S2gNotJxfloOH5ytL4d/A44IokEx2oX
CY70o0hwfKyKBEc8keBIP4oER/pRJDjSjyLBcQErEhzQIsGRfhQJjvSjSHCkHwEu
5w7dAUf6USQ40o8iwZF+FAmO9KNIcKQfZYFHNTjmBzgSEp/WaR2h8ajNQlFxPmip
vzlmg0eTl35sOnP4U3/dFPzla8WnH3E954puAbVZTCrOR8Pxk6P17eB3wBFJJDhW
u0hwpB9FguNjVSQ44okER/pRJDjSjyLBkX4UCY70o0hwXLmLBAe0SHCkH0WCI/0o
EhzpR4DLSU044Eg/igRH+lEkONKPIsGRfpQFHtXgmB/gSEgcPKFLhMajNgtFxfmg
pf7mmA0eTV76cd0z5zyxtOKPEdofT574Zodn0BHnw8GYYza40U99y0rFpx9xWeOK
bgG1WUwqzkfD8ZOj9e3gd8ARSSQ4VrtIcKQfRYLjY1UkOOKJBEf6USQ40o8iwZF+
FAmO9KNIcKQfRYLjlkUkOKBFgiP9CHA5d+gOONKPIsGRfhQJjvSjSHCkH0WCI/0o
CzyqwTE/wJGQGD+jU4TGozYLRcX5oKX+5pgNHk1e+rHhfS0fe26l4F++7lDujjSl
uo3sNWC01Q6+wDrMemyb/sGglflVbzlyYK+U1Nn3n3HUtuztKq/rgLvv79Ru/FOX
Vcw7JOPIIRcetDp3QkbWs2+k3nZBla1fbM/cWjH7s9Ypr6b2arhgys7a5zQad+6a
jrNG7PynTbN7mvXb1O77x3Z9kvNh43cePKHPgJe/zmm4/d0/Puv89HWLVz/1znPH
d9lcZdWfP3ftMerNf88fvevH9rsWzv6lSsdTGlYfeMH5jzbr+miNdQu+Xrht5KaX
Wp3w2rcPnbjswqcmVn69yadLD76++8XduvY//9iXVw1ZsDPvslPaVuo3vtwhdW7Z
OWt0rwvHbX7/5PE/NZg2YeSCWn9ve/7DJz5o9eMr7Te93WvK2SMWfDt2U5ez7npk
RtcnRt836p/HnrltY7uD5tVaMO2UIz8eecnixr8d0Gxxua8ufX/VoyNHtJ42JuXt
xhf17V+vc++XFn3dcsWHIy+bsGNwy+W/NsqcOHvn71PrXPP23+tqPTF9RvjdTUu+
mV3v2zWq0R1zx9S7+psjj/9xUp26t47e2vnJzydvWF/l4MXtoitPn5R9w9tVz3z9
pjpj7nll++heJ/7ZYGmn2WmRGdNXTaoy+JgjR3yT8eX77WtdnfLS0A6n9VgyZze7
a6/88eRBbRo+9eWGX9c3Gfpm6zMf/7HzzrVnzsrd2WdYh9MaLjnCeklq96Gl++eO
ux/9PG30bRe/NOSqP6//9eXVp9++9uLFy5+KTu/36C8vd+01dNH2Q8+46sfPHlm4
7e0ay/K213zyqHPuvPC6rguGPHDHs/02HRwp16H/9+uuue6u7WPaXrZ2x9wrrqz6
4mtvDGrW9Koraj77+f3TT0/b9d+Gzc/8cOs3C79aectpgxutnvDVCQ1bv3tO7UjF
GvNrjHhp2kVHXbvz3ica33DqpkPfnfXykAY/HHPOHwNPWP/43BdH/nrHUR1md6q0
48i7a275/puLt898rEfN0x7/59tDX77gn5e25P967cDze0+75KJTl5//wtPLu685
54zlLx7+9badiyZ9e2PfE9+9o++OP+5ftm7d34/WP+iiFg/2fT7aa9D6vk13jX6u
4c5n71/23OCfz1m3bMuMB8/+Y/jGXl+d9PvE157/eMkJCzsf2nzhH1dv/en7pW++
8sc5F/+xcPDUh1qP6zHwr/Yb5vz52tIaq9p0HPRhv1p9qvyxcPKgp1c2/n3md8se
q3Rxj0s7be79wqtPLy3/0HvV6n63WM2NrKjWre+gPgfmH1iAj90c6/YZN9DNmjbo
3XfAgGHWTWU96wTQylqlk5zzET4TcBmarM+GfU3YDdhH0EGqsfXfhpndslvkhMI5
9j5KUc1VU1XNukutbI2Vt/biudYZro9Ksf6HDLRKf1CNUfpCD9PgNeOd57unqHru
P9Qh2V3fO7Hy6fmOGRtTsc9qt988cfWxoje1X6G1JN99Ef5jzlTJThqhp5L1U1lV
VzgXt4WroxONf89U7exx/WN6cTJfyWmSfcmDmVwdXNhT1fqppvB1Fa4StLY7J8/W
+UXtFoZdzv4jna1TQNQr9Qn1pDPD7Flz2zb/63XnFe4rlVqxHIrZ5dU8+5g/wZ7h
ktRZanaRbXDVNT++rWfoaO/Vp9Uzao56XJ2sdCa6JOEud97DIzfsusG77zAem6m8
8f6WpOJnKk70lVTwmVOAd83cmlmqvtIXs65PSXpK5amixwKnxOY1fzm05HnhPSe/
KAPaxGKZ1CXHSnxes9Cq5HnhTRngn1gsc+aSYyU+L7bGVcnzwttkcDkSi2Wq5FhQ
YvPu2bHk/iQWa+88lvCT+Hu+dx5Lrm9isUyVHAtKbN49O5bgm/h7vnceS/BN/D3f
m46lIwpuVbii0H2xK48X3lz17e8H3BYpUO61h6bW+7+xulR3qdhrYm1qYdxK9nVi
cUJ0V1fZhA2sn1/UoYW9mI8o4o7utCnMY+JI+/iqbl2ntrX3lbYvI/YCYqenFLU7
EvthYv9M7BNSi9p3EnsNseulFbVnW/aJhh0l9qnpRe17if01sZtkFLVvIPYKYtfM
LGpfTuyFhfYtxjvDqPCdudU5BsY67TinnaOOUfrqrKHj6ZE+2hq31Q477EMN3/lD
OMiwGbiod+V9SLP+r1eup3c8vy3+W/KigRLzSmzJmtr9VxzhLN8nSH/sor1AYfl2
s/8dW75NjeV7eH7hPx25y1fnDItXqZZv4ah3+ZZweBWOJnB4YSdyCg6vRF/hHl5P
kv7g8AoOL492/xXu4XVJ4ca4SYurv6/bpNwzZ0bQp5MO3ouPqVOgZbaPKaSiEpX3
8IJKOEjK/hTn7ohZhgdUNBczL3331pm7IxLZHaXaEWW/WtwdMdu2YhK7I562rZi6
5l9ga36cpVH8joh98pasUu2I3VkadAe44nfEM7YV054dEUnfEck7IubYVkwCd0RV
+7bb/K3NQ+0kP25ULNkPHdJAE9seZif+nRFH5vgh9lcVtlCV4yivoLaCX37Gf0Mj
c3Iq9sn4X6hDzvdh/WVIBesl29XNDsBaNVXpClVsK3rQYn76s932T7bcvebamjBc
pL+SGmV/ERFP/Lnc5eCUl6/3WZY6PPPs8nOzGobbZQ4tf3tWKNw4s1v5R7IODadZ
5+3d32f4Cir5MvcNVK9gosJXNSnWTXqKtc0p1gnb3nJrkzYXesW+tnG/hHnr8Owb
D3/v+0j59Az9dRirReoRaz+FrBmbq2qqj9XTLc1eAs4XZfhHFrOnjypcdNNVkxT9
VRKOblupBUUodPTivgQpdIsFgqXfIK8wFZYcVNNp8Uq8xg3sPquV/q0sV64/ZH4f
5Ahb5O5c99//WjvLbh0up39JvrIvevPRLsFC1q2+ENb/1m1sG1NVvfzG9i48Ma1z
ahP7X81VvdTSLAVzV1PFlsKLWYOz2+Q0DH+edW929ZxQeEnWtdlNc/bFpVDN2oIT
PUuh007Xy10Kx+e/unj1/Rdc+qljb7eWgvPNsK2ZMx8r0lZ97WB7KaSVwVKo4Q6y
S8E7R0yFbkWXQrwVDC93KbhBY4eZ1p4uBWsHFS4F59//WjurcCm4fXu6FD7JvCFN
L4W30r5OS9ZSKKf+ydhcAWfSQzJDYX0mDYX1mXTfWQr6WiL2bmJLYOmjJr/t0TZH
r1R9NeK+u7HjKj+/NPvXZebk7t9U9b9y74WHhBZWrJq1NXxW6N6KjbPSK/4ndG1F
pZql6f2bXi/x/dssLT1Wj5E00f2rj0NI70FT7h4wr2bcsUqqkU24Xelj+hvrZ4jN
2dzxOKYAdagonkhBLmaJ023tb8tSXc7vP3xA3wYqTyGO3oYUO3WUpTY0xN5F9JD6
Jh139HrL0q0Pq0x1hfWvgdbPIOvnmFK9u3ilnt+r2OrBdWjnzIZhXIc2s1YOrkPR
pu53q+eS/5fVMzl9XWhsxrjwovTU7N4ZfcIr06tnn5FxJj6dUpz923M39m+K6jnZ
2pBx1uvRrrNOBGMzYi36F1n9fZw21bqN6Z0Ra9G/0upHfLTVrf4zMmIt+r37V6+e
m9NKu3pq/qtXTz1rjFs9KBxKUbWUKnBfWR+WOnXAiCuH9h3Wu++g3n3z+g8a3nfQ
sP7Dr86r17bhBQ2PKv2i2pLkRZWq3ilXLvRgKJT9Q7n6oWtCm0OpWSeHLgl9GCr9
m24HSKr4Nx0q3Zs+0nnTJ8R5089VeNMPKPKm43bcKamkb2+uwts7r8Xe8PZenrum
fLcK43Mn5O4q36JC/9wncivn1K5wnrWJTUtxRmxqnRG7VVBqjXUEox1vzXN5bqxF
fwurf5fT9rf6JuTGWvTXtvor5+gW2/FEbqxFf7y3985Qad/eR5wz4iuKPyOilM9+
e5c43c7b27WJc0qsqxBI30Z6V2+mvWnx3+RknxhzVWbmdxXOzmwUPjoz2/45MPPX
CidmHmbtkdTU3T8xpuoXJFn0TdZvETRDtVT6lj6i9D1NcSq8RVJ6zhl5eH8chLZ4
dWn2e3Hav/c7buWw31GdW5yK3+94ddnv96r5BQWIMC7lRvuS6Gjc+GIKXEGNUXmZ
XjxT8fpNwcX1w+15QUGBWrVqlerZs6dto92yZUuRW/h9wWd/VDzWRPbH3uYTKFCg
5GtrQbrSp6ltKj8tdv2IK8ISTw6BAgUqom0qnB67hIXcVRTvTJfI2TDwCXwCn33X
J3ZuxZnWPbfG805kxsAn8JHmE1tFVhOsosAn8CmFT2wVpavgPi9QoNIotorwNViw
igIF2n3FVhEqroJVFCjQ7iu2ilClEayiQIF2X1vzC/JvKiz+mFL4r0cLfzNMZ/Qf
s3/RxVpwngp+bee3jXmgKMSsYtFFIkvyO5R7LlU/HPRhq61Xw3446ANfDVrZuNK7
F2V2337IE+Pb9tqeOu6KiYcO+uS+s9s9/dSWwzfMPv2gZ5vlDBlS/7KrM38adWPW
L5XHHfNTxXOW1NgeuvfrVlmDLnnywiOXVp27qu7IHcd/980NHz736IKLR2887uZz
rzvo4c3hcxq++eejHy44vu6Qj/oun9Z8460trv3ozVv+2P71O99sC01f9P7Op194
++peq55t/+gVsz5uWLvlhCrp06Nvdpm/s+PEng/f/8L2Wu2zawzeOmB+txOuqnLu
u18c1mvLyonPrxqnDrn9iyfHP5qfP+KgVTW+OubrHR9m3plet9/Tdfsddtew5Yce
dOSMbZPa1fzqm3pbnznsgmMmvPtln0ta9Vv6/qC+q0968rzfp+88cVWddovLfXVa
h1V9L5pxZsdOBZc0ueik9ucNanbliz+3/Gdj3ieTdwxvteKHi9Mnnnv454dUbPjT
6AoTz//9zpaV06aNuGVIj6ztswcf3GHXvdv/yT2i4uqtz/3c/PW3dn7Vp8dFzd7a
+XifHi2X3zF0QI/b/gl1/7nNgDY/LV7SptGt/ww8a+rLTz1Qpf/rHe/p//r4A++r
cW/GAyP+PPytiQ9/kT/t0Hvr1txQ46gvx/ynQdvxVzwyde2F1ecNmNXhi7NyapzT
4/dZ6+a06HHe2VnVl/Y/7qn+d/923+xPO75xxKoPPn//07TtqeUfPKFKzmdXjH70
f2c//PXkx0IvHHngsced/WbvnFb3T2344oNzGt7doMriLqfcvaN/eoWlFX5r+cU7
9c9bXvU/f30w84sDf63R6vwHn/2oWd+jOj03/YGmizosn3PKgLOX3/1+9OY2y+eP
HXjPta8uOGtX92k1a17b/Ymzzn9maotZN6zr8nndT39+++joOfOX3Xbuzy2vbDp7
5b8dTzi49exrFvw+YNuUR577oetv5Wee+tqz9z395JjTLvj52bmj1dylG7Kue+GM
UeOuatd9VNtah83avGJV22uGle92za55T/4287N7JlS6odX3y+ovuPulo6dt7Dhl
45fRKr1qbV1uPkIz1zrUcdvT7LLBl6rg8ZklKB+7AfsI0o/PPDrzwuymOdnhXKf4
7TjV1PrMCKlKSpdTdlKleXzmEe3vPrz93WfmO2ZsTMXqwNx+vFVuX2ken4m/qeY+
PvMUxx061fh30cdnml6QG92V+UpuPPb4TPezOPb4TGwHCvW4x2c2zC9qNzds/Qir
k1MwW//UZ9U8Z4YR/7vkkW2hV5xXlPz4zFPsGS5PfV69UMrHZ3a1iV5U89UCldij
KiGssuDxmfGU2Lzmb4GXPC+86aMn0SYWy6QuOVbi87q/8Q6VPC+8KQP8E4tlzlxy
rMTnxda4KnleeNPHNkKJxTJVciwosXn37FhyfxKLtXceS/hJ/D3fO48l1zexWKZK
jgUlNu+eHUvwTfw93zuPJfgm/p7vTceSfihLf8cxduVRZcAblQe8catt78njM+lv
/VAhuquEH5BW4uMza1rXqafY+0rbQ4n9HrFrpRS1hxF7GbFrpxa1hxP7fWLXSStq
z7XsUw07Pb2o3ZXYzxI7I6Oo3Y3Y84idmVnU7k7s5wrtEh6HszsPSHI8PQoeMJfo
K9xnJj1L+oPnFyb8tKXg8Iov9/CaR/qDwys4vDza/Ve4h9flhRsj/PGYzxse0J49
+m4ffirkC7YVk9gd8aJtxST28ZjzbSumPTsikr4jkndELLCtmATuCP14TCSMgQkl
6/GYDTM+DjXM/TbcIeO3UCj3jbD+siMcxqOYdv8pANtt/2TL3Wuu7ffjMQ/L7FD+
iaxG4dMyR5Yfk5UdbpTZo/zUrMP2wWcCVre24BRFnwn4daFX7GuZOu1++zSr2fLI
nacd8Hu9F0t6POaU9FuUfjzmcaqm/UzADmmlfSag+6RKlVpQhEJHL+5LjkK3WCBY
+g3yClNhyUHuSsEr8Ro38O48E9D8vscRtsjdue6//7V2lt06XE7/kny1B88EbJ32
P+fxmMep+1NKsxTMXU0VWwovZg3JbpnTKPx51n3ZlXKyw0uyrsuun7MvLoUa1hac
6lkKHTyPx2yYT79vLP7xmNXerGwvhbQyWAp4Vpctdil454ip0K3oUoi3guGV7KUw
k3k8prWzCpeC27enS+HDzMnO4zHfT1ucxMdjNsz4roI+k2aH9Zk0O6zPpPvOUkjs
AX/9/18e8Le93IPhgaEJFStlLQ23D11esX7WmnCTUAdRj8dc7jzxaIniHwaG4oh9
8/GYra3r0I6ZjcI9revQRvYTqS7MRrv/PR7z8v+X1TM5fX1obMZt4UXpadm9M/qG
V6bXyD4j4yx8OqWU7kmJeCzmbWH9eMz1If1YTLdFPx6L2ddp07L1YzHdFv14LCbi
o62RrR+L6bbo9+7fZD8eE4VB+9XjMX8sVz00NFQzu0JWm9DZoWjoyKxOoRahDaHS
v+l2gKSKf9Oh0r3pY0p4PGYnhTc9o8ibjjuBZnmXDb6Uvrm4jgkejrnvPBwThXrB
wzELf/aOhzTihv4kZfzdizgqvEFSes6iD2nEq0uz34vT/r3fcSrDfi/8IwtxVPx+
x6vLfr8HD8cstc/+qHisieyPvc0nUKBAyVfwcMxAgcpOwcMxA5/AJ/Ap6hM8HDPw
CXz21Cd4OGbgE/jsqU/wcMxAgfZUwcMxAwXaUwUPxwwUaE8VPBwzUKA9lZ8Px5yr
Fod0KQ9+U+1PdEbxO0VaqLdArCOezo7QGg1qF+nwDDrifNBSf3PMru6K6iI+zndP
9UDXp+7vM2JjxAUHMGKgrXn+gREaj9osFBXng5b6m2PJBt8xc+fNN52+qRAcxwdi
APzCTRUiNB61WSgqzgct9TfHkg1er3qry8/YGXvHsUAQA+Cf7SofofGozUJRcT5o
qb85lmzwh25956M1D8XA3TgAf3tTKELjUZuFouJ80FJ/cyzZ4Nc89vPjXbrHwBEP
MQD+wF+ZERqP2iwUFeeDlvqbY8kGX7Gj4d8d1m8oBMfdDWIA/OKLy0VoPGqzUFSc
D1rqb44lG3zJlBO//TE79o7jghQxAP7Q0JwIjUdtFoqK80FL/c2xZIN3z3tqa8e5
MXC3wBXgz2/aj8/jW9d+8p9O18bAcRGEGAB/bHJuhMajNgtFxfmgpf7mWLLBT/ir
0e3/+yQGjqtExAD4cTUzIzQetVkoKs4HLfU3x5INXv+4Nw4a++aGyFx1X1hfxFZU
zkXsqNhFrCm6BdRmMak4Hw3HT47W3hWj9HU751tmcsB1pJhoPGqzUFScj0bhJ0fr
Nzgt1afxqM1CUXE+GoWfHK3f4LiINUXjUZuFouJ8NAo/OVq/wd3bY1c0HrVZKCrO
R6Pwk6P1G9yOZ4jGozYLRcX5aBR+crR+g+Mi1hSNR20Wiorz0Sj85Gj9BneeYlso
Go/aLBQV56NR+MnR+g1u/k4TRONRm4Wi4nw0Cj85Wr/BaWaPxqM2C0XF+WgUfnK0
foMXfSCWl4XaLBQV56NR+MnR+g3uPjHMFY1HbRaKivPRKPzkaP0Gx28pQu75nMaj
NgtFxfloFH5ytH6D279arQSC5zqmHPCoBnfnx83KqrMWtKHxqM1CUXE+aKm/OWaD
R5N3h37g/C7XvbLsswjtjydPfLPDM+iI8+FgzDEb3OinvmWl4lMT5l063QJqs5hU
nI+G4ydH69vB74AjkkhwrHaR4EhNiATHx6pIcMQTCY7UhEhwpCZEgiM1IRI89mg8
LRqP2iwUFeejUfjJ0foNHns6txaNR20Wiorz0Sj85Gj9Bo89s12LxqM2C0XF+WgU
fnK0foMjNSESHKkJkeBITcgCj8ZSE4iGm5UVizftv6mJpfPufPzPzl9GaH88eeKb
HZ5BR5wPB2OO2eBGP/UtKxWfmjC/R6dbQG0Wk4rz0XD85Gh9O/gdcPfAd0XjUZuF
ouJ8NAo/OVq/wQEtEhypCZHg+FgVCY54IsGRmhAJjtSESHD3l37kfL/mgCM1IRIc
qQmR4EhNiAR3n+0sDhypCZHgSE3IAo/GUhPujcqEctUjNB61WSgqzgct9TfHbPBo
8lITlep0WVSx7dcR2h9Pnvhmh2fQEefDwZhjNrjRT33LSsWnJsxKd7oF1GYxqTgf
DcdPjta3g98BRySR4FjtIsEBLRIcH6siwRFPJDhSEyLBkZoAuJxrOQccqQmR4EhN
iARHakIkOFITIsGRmhAJjtSESHCkJmSBR2OpCYDjZuWzV1MjNB61WSgqzgct9TfH
bPBo8lIT4TEnL5vaeUOE9seTJ77Z4Rl0xPlwMOaYDW70U9+yUvGpCffAh+gWUJvF
pOJ8NBw/OVrfDn4HHJFEgptZWIjGozYLRcX5aBR+crR+g5uf8RCNR20Wiorz0Sj8
5Gj9Bge0SHDEEwmO1IRIcKQmRIIjNSESHKkJ8wOOxqM2C0XF+WgUfnK0foMjNSES
HKkJkeBITYgER2pCJDhSE7LAo7HUBKBxs9J2cLUIjUdtFoqK80FL/c0xGzyavNTE
O+vaH1SuYVA1ofjUBN0Kw/TYLCYV56Ph+MnR+nbwO+CIJBIcq10kOFITIsHxsSoS
HPFEgiM1IRIcqQmR4EhNiARHakIkOFITIsGRmkBMOfdrDjhSEyLBkZoQCY7UhCzw
aCw1gZi4WZk0eT/+hY6hb9WqtqNDkJpQfGrCfJ473QJqs5hUnI+G4ydH69vB74Aj
kkhwrHaR4EhNiATHx6pIcMQTCQ5okeBITYgER2pCJDhSEyLBkZowq6NoPGqzUFSc
j0bhJ0frNzhSEyLBkZoQCY7UhEhwpCZkgUdjqQmA42bl6PZ5ERqP2iwUFeeDlvqb
YzZ4NHmpiU+/X3ncEVnfRGh/PHnimx2eQUecDwdjjtngRj/1LSsVn5ow/+Ia3QJq
s5hUnI+G4ydH69vB74AjkkhwrHaR4EhNiATHx6pIcMQTCY6zukhwQIsER2pCJDhS
EyLBkZowf3+JxqM2C0XF+WgUfnK0foMjNSESHKkJkeBITYgER2pCFng0lpoAOG5W
Xm/7+v77Fzo+n7/9w2PfWx2h/fHkiW92eAYdcT4cjDlmgxv91LesVHxqwvyb6HQL
qM1iUnE+Go6fHK1vB78DjkgiwbHaRYIjNSESHB+rIsERTyQ4UhMiwXE5IxIc0CLB
kZoQCY7UhPmEERqP2iwUFeejUfjJ0foNjtSESHCkJkSCIzUhEhypCVng0VhqAuC4
WXn2xcYRGo/aLBQV54OW+ptjNng0eamJR8qn/3Bf5c0R2h9Pnvhmh2fQEefDwZhj
NrjRT33LSsWnJnB2d0W3gNosJhXno+H4ydH6dvA74IgkEhyrXSQ4UhMiwfGxKhIc
8USCIzUhEhypCZHguI4TCQ5okeBITYgER2pCJDhSEyLBkZoAuJw7dAccqQlZ4NFY
agLguFm5vstRERqP2iwUFeeDlvqbYzZ4NHmpiV3vDHm1wjHfRmh/PHnimx2eQUec
DwdjjtngRj/1LSvNVYutM1kNpT/X7dSEtbtPdUYRFUfdrI+Oj9AtoDaLScX5oKX+
5liyj4G2E46r+NvV30VccAAjBtr3x50WofGozUJRcT5oqb85lmzw1MuPOLvaL1sK
wbHaEQPgN/S+IELjUZuFouJ80FJ/cyzZ4EMXf7n2ymd+KARHagIxAD7xjq4RGo/a
LBQV54OW+ptjyQbPOP7RrKFNfiwEd+MA/KgPe0VoPGqzUFScD1rqb44lG/zzLTnV
3j5uayE44iEGwPu17xGh8ajNQlFxPmipvzmWbPBuB9f4pP6y2DuO1ARiAHz0K5dE
aDxqs1BUnA9a6m+OJRv8lNoV+53TOfaOIzWBGAAf8Np+fKjfPv/8IXOOjYEjNYEY
AK914n4Mfv36lPtPqhcDxwUsYgC86dN9IzQetVkoKs4HLfU3x5INPqPdDY0vnR8D
R2oCMQA+adfwCI1HbRaKivNBS/3NsWSDZz73YN4nD/0U0d+v4SLW/H7NvYg1RbeA
2iwmFeej4fjJ0fp2B+eA60gx0XjUZqGoOB+Nwk+O1m9wXMSaovGozUJRcT4ahZ8c
rd/guIg1ReNRm4Wi4nw0Cj85Wr/B3eyMKxqP2iwUFeejUfjJ0foNbsczRONRm4Wi
4nw0Cj85Wr/BcRFrisajNgtFxfloFH5ytH6Dm7+fCtF41GahqDgfjcJPjtZvcLP6
FaLxqM1CUXE+GoWfHK3f4OYXDhCNR20Wiorz0Sj85Gj9BsdFrCkaj9osFBXno1H4
ydH6DY48rCkaj9osFBXno1H4ydH6DY7v1yA537Y44Ph+DRIHju/XIDngUQ3uzo+b
lQnfdIrQeNRmoag4H7TU3xyzwaPJu0Of98NzH0368ocI7Y8nT3yzwzPoiPPhYMwx
89qZ8y0rFZ+aMO/S6RZQm8Wk4nw0HD85Wt8OfgcckUSCY7WLBEdqQiQ4PlZFgiOe
SPBMJRQcqQmR4EhNiARHakIkOFITIsGRmhAJjtSESHCkJkSCIzUhCzwaS00gGm5W
cl/Yj6sf3+t0/YJev2+J0P548sQ3OzyDjjgfDsYcs8GNfupbVio+NWF+j063gNos
JhXno+H4ydH6dvA74O6B74rGozYLRcX5aBR+crR+gwNaJDhSEyLB8bEqEhzxRIJn
KqHg7vNfXdF41GahqDgfjcJPjtZvcPfpMnK+X3PA3d9dEweO1IRIcKQmRIIjNSES
HKkJkeBITcgCj8ZSE+6NyuBdXSI0HrVZKCrOBy31N8ds8GjyUhNzf5v594o6P0Zo
fzx54psdnkFHnA8HY47Z4EY/9S0rFZ+aMCvd6RZQm8Wk4nw0HD85Wt8OfgcckUSC
Y7WLBAe0SHB8rIoERzyR4JlKKDhSEwCXcy3ngCM1IRIcqQmR4EhNiARHakIkOFIT
IsGRmhAJjtSELPBoLDUBcNys9D1iQITGozYLRcX5oKX+5pgNHk1eauKEbe0nPnPz
tgjtjydPfLPDM+iI8+FgzDEb3OinvmWl4lMT7oEP0S2gNotJxfloOH5ytL4d/A44
IokEN7OwEI1HbRaKivPRKPzkaP0GNz/jIRqP2iwUFeejUfjJ0foNDmiR4IgnEjxT
CQU3/1wwRONRm4Wi4nw0Cj85Wr/B3T9GJOci1gF3H3UsDhypCZHgSE2IBEdqQiQ4
UhMiwZGakAUejaUmAI2blUmtu0ZoPGqzUFScD1rqb47Z4NHkpSY6TRp3zN1HBlUT
ik9N0K0wTI/NYlJxPhqOnxytbwe/A45IIsGx2kWCIzUhEhwfqyLBEU8keKYSCo7U
hEhwpCZEgiM1IRIcqQmR4EhNIKac+zUHHKkJkeBITYgER2pCFng0lppATNysnDT8
4giNR20WiorzQUv9zTEbPJq81MSL70zrNu6nIDWh+NQELmRd0S2gNotJxfloOH5y
tL4d/A44IokEx2oXCY7UhEhwfKyKBEc8keCAFgmO1IRIcKQmRIIjNSESHKkJgMu5
bXHAkZoQCY7UhEhwpCZEgiM1IQs8GktNABw3K3/X6Rmh8ajNQlFxPmipvzlmg0eT
l5oY8Mk95/6btjVC++PJE9/s8Aw64nw4GHPMBjf6qW9ZqfjUhPkX1+gWUJvFpOJ8
NBw/OVrfDn4HHJFEgmO1iwRHakIkOD5WRYIjnkhwnNVFggNaJDhSEyLBkZoQCY7U
hPn7SzQetVkoKs5Ho/CTo/UbHKkJkeBITYgER2pCJDhSE7LAo7HUBMDtqolIuwiN
R20WiorzQUv9zTEbPJq81MSQ1845d8sB30dofzx54psdnkFHnA8HY47Z4EY/9S0r
FZ+aMP8mOt0CarOYVJyPhuMnR+vbwe+AI5JIcKx2keBITYgEx8eqSHDEEwmeqYSC
43JGJDigRYIjNSESHKkJ9wkjEI1HbRaKivPRKPzkaP0GR2pCJDhSEyLBkZoQCY7U
hCzwaCw1AXDcrBw1vXeExqM2C0XF+aCl/uaYDR5NXmpi63kLa98yLKiaUHxqAmd3
V3QLqM1iUnE+Go6fHK1vB78DjkgiwbHaRYIjNSESHB+rIsERTyR4phIKjtSESHBc
x4kEB7RIcKQmRIIjNSESHKkJkeBITQBczh26A47UhCzwaCw1AXA7NZF9doTGozYL
RcX5oKX+5pgNHk1eamL7jw/X7/uG4KqJDuVOsm7Muo3sNaCZ1T5g7YhRPbZduGLQ
yvzwuv8uTbm53sCj7n2oxpG11eHZWcflzJpYveKk05ccNXTASxdtWvPGgryNE96a
cdBLtf+q+9phDxYcuyEn3OvYK6atGLWtedubBxx/X7e167ce+8Ku17/6/PYnxl91
/1WTwju+zzpk/tzjF77/4UP/eWlFm/FrLq3a7abqNf7bc/HkLhua/d371P+9eeDx
xx6xc9vQ2t+133Z7u1em1h348t+39jru7DO3DTq83663p9Q/KaNP9OyTb62x9fMv
Z69eu7nho9Xfqf1b6+O3j2l81tLbBlR+9KFbfzx++vCnx6366YT6X79xyd+HjLj9
9jmVDv6x65Ctt15f8ZxKax9tE5m6bNJ3XQ97vtNza++6o0P5dzvM3Fpv0dThlfse
sGPYeTeEfxv738MOPXnG/FWXPHFiyo47+t90+B1Dj3/xmgNu/fj7n/7+4fHWNXNf
+O2jIyfOe+qFk6479t8vR5958/NVok0iz308t95bj2fN/bVDj/Dix35p22zm9c+M
emfXqw89+/aQfhds6Kxe77Hs6+4Xtzngvp++Sz1gyNyVQx5ZOWJMqwb1czdtmVa3
5bhHr5y6IW/C6/3H3NTyryeyiulsXffr7aOfPGrILdcv3PWfJW1rXrcy/YAh/zvr
oJpvfXzsWYPDp61v/kb8zkYtd/SYdcWA7j/233b1d+OvePfPFrOuvP3Zx0f9dcDy
kWcvPu3uuXMvD7ca9PntBzx4RdUZH9/y/BF3PpZz6Z2vTrn7x1W/Hnh5rwpPfHnG
yM5t618x/t6Xr6r05WWDP89a1fe+X7/ddkXWp72f/PbkW4674oxfO51T98OZPd6Z
seiaO0dNuejVa1bU+GtNztOTJ3zT6sHDn2686LA27zWe3alLzl8nrrztixcGnfpG
gyqRxbenf5B77cjDfpk16Mgr0iuff2z5m5ZeU63/qk+iY4cf/dCVE4a9X//+/vln
bpwbHnbFgVXGdX2+6ev1b6i5tvbCszZcO2TazkUDhw4f3vqDFpP6//pF3WlH1jjo
pWU7H3q76XlPD3w+/MM/K6bd2f1/184+8qAnL6iwuvbc1x75YuY1T/VIOe/hdatf
fhq9Py++/qcmm0KLRlV8df3jz33303/r/TFmzZEnrljb/8bhg9968cWtgy7s2rbH
OUfX/ffIY//TbNqFyy48uNW1dWtlrl6ccnrtk67s1ndQnwPzDyzAx2UF64yBxdv8
ssGXWheJ9awP7VbWyprknEOwjnFaSdZ63teE3YB9BB2kGlv/PTrzwuymOdnhCvY+
SlHdVVPVwLqlLq9S7EuwPtZZqY/17xT9RzDTH1RjrCasdE4RrxnvfFeaouq5/1DH
P3eQ9f/O+Y4ZG1Oxz1e33zzZ9LGiN7VfobUk330R/mPOVMm+CURPZfunusL5s73j
Dp1u/Humaqf0+RU/phfkRndlvpIbn1T4l+31Fil1cGFPTeunlvVTRbUufP1254R3
eH5Ru55hl7OL4dulYLaBqUvUG84Mt37bdNOSYSudV7ivVGrFcihml1fz7GO+vT3D
oNQ31VtFtsFV1/z4tp6hn030tnpHvaseVyerog/5i6cK1s+8h0du2HWDd39hPDYT
jqxEVfxMxYm+kgo+cwrwrplbM0vVV/oC1PUpSU+pPKXf+eKU2Ly4yXVV8rzwnpNf
lAFtYrFM6pJjJT4v7lddlTwvvCkD/BOLZc5ccqzE58XWuCp5XnibDC5HYrFMlRwL
SmzePTuW3J/EYu2dxxJ+En/P985jyfVNLJapkmNBic27Z8cSfBN/z/fOYwm+ib/n
e9OxdETBrQpXFLovduVxTo0tL9549mjb1tcemlrv/8bqUt2lYq+JtamFcSsV2SZO
iO7qKpuwgfXzizq0sBfzEUXc0Z32/OYxcaR9fDW0rlPb2/tK2wuJfVJKUXsFsbuk
FrU3Efu9tO7W9WPM7pBe1P6K2P0yitq/EPvaTNe+xSBnVEh+q7OPxzrtOKedo45R
+uqnoePpkX43G7fVDjvstxLfkUF4E7EZlRwb8mZZ9X+9cj294/lt8d+SD0ooMa/E
loSp3X/FEc7yWEL6YxfFBQrLo5v979jyaGosD/eiPiZ3eeg8WvEq1fIoHPUujxIO
r8LRBA4v7EROweGV6Cvcw+sN0h8cXsHh5dHuv8I9vAYVboybFLj6+7pNyj1zZgR9
+qbee3KfOgVaZvuYQqonUXkPL6iEg6TsT3HujnjT8ICK5jrmpe/eOnN3RCK7o1Q7
ouxXi7sj3rKtmMTuiLdtK6au+RfYmh9naRS/I2KfvCWrVDtid5YG3QGu+B3xjm3F
tGdHRNJ3RPKOiHdtKyaBO6KqfVuLhK17RjxU4Yzq3Ob/i1YDTWx7mJ1YNxMA2nLH
D7G/CrCFCR3lFdRW8GuY8XGoYe634Q4Zv4VCuW+E9ZcNYesl29XNDsBaNVXpii5s
K3rQYn76s932T7bcvebamjBcpL+SGqWqFr7CK/5c7nJwysvX+yxLNc/sXP7OrEbh
Lpmjy1+WlR3Oz+xdviDrsHCadd7e/X2Gr3iSL3PfQPUKJip8FZJi3VSnWNucYp2w
7S23NumTQq/Y1yJ9n7x/03f3rY5ctiLl4Bl3fB8pn56hv25i9aa1f7OsoyvVuulv
oPpYPa3T7CVQ+Et75axx754+qnDRTVdNrGG8g4VbnVpQhEJHL+5LhkK3WCBY+g3y
ClO5K8RdTnglXuMGxnLEGC1vdOX6Q+b3LY6wRe7Odf/9r7Wz7NbhcvqX5Cv7ojcf
7RIsZN3qC2H9b93GtjFV1ctvbO/CcNrGlCb2v7qrUamlWQrmrqaKLYUPs4Zk181p
FN6RdV92ak52eE3WddnVc/bFpVDL2oLTPUuh5U7XK7YU6Pd95dOdb15tzZz5WJG2
+rsH2UshLelLwTtHTIVuRZdCvBUMr2QvBWsHuW+B++9/rZ1VuBTcvj1dCrMzH07T
S+H3tNvTkrUUylln0u8q6DNpdlifSbPD+ky67ywFfS0RezexJbD0UZPf9mibY2Cq
vhpx393YcZWfX5r96zJzcvdvqtpe7sHwwNCEipWylobbhy6vWD9rTbhJqENFpZql
6f2bXi/x/dssLT1W75A00f2rj0NI70FT7h4wr2bcsUqqkU24XOljeon1M8TmbO54
HFNwoNLFCSnIxcDBVn07M9Pl/P7DB/RtoPIU4uht0MUjWWpDQ+xdRA+pb9JxR6+3
LN36sMpUV1j/Gmj9DLJ+jinVu4tX6vm9iq2e1tZ1aMfMRuGe1nVoI2vl4DoUbep+
t3oG/b+snsnp60NjM24LL0pPy+6d0Te8Mr1G9hkZZ+HTKcXZvz13Y/+mqJ6TrQ25
zXo92vXWiWBsRqxF/yKrv6/Tpll3a70zYi36V1r9iI+2htV/RkasRb93/+rVc3Na
aVdPzX/16qlnjXGrB4U5KSgNKnBfWd8uFDp1wIgrh/Yd1rvvoN598/oPGt530LD+
w6/Oq9e24QUNjyr9otqS5EWVqv4qlxe6JHRodu2sk0NtQrtCLbK6h+qGNoeMN303
PjIbmyViSRP/pkOle9PHOW/6hDhvuq6cSy/ykQl/lCvS9zZX4b2d12JveG8vz11T
vluF8bkTcneVb1Ghf+4TuZVzalc4z9rEpqU4HTa1TofdrKu0Ndbhi3a8Nc/lubEW
/S2s/l1O29/qm5Aba9Ff2+qvnKNbbMcTubEW/fHe2ztDpX1vH3FOh68o/nSIOjlc
zZvvLVItXZs458O6CoH0PaR36Wbamxb/TU7eWbFqfkGBffCm3GifH47GXQCmwOlk
jMrL9O5LU/H6TcHF9cO9SkFBgVq1apXq2bOnbaPdsmVLkfuZfcFnf1Q81kT2x97m
EyhQoORra0G60rnObSo/LXY+xRmyxJNDoECBimibCqfHrpchdxXFO9MlcjYMfAKf
wGff9YmdW3Gmdc+t8bwTmTHwCXyk+cRWkdUEqyjwCXxK4RNbRekquM8LFKg0iq0i
fC0QrKJAgXZfsVWE8pNgFQUKtPuKrSJ8ax2sokCBdl9b8wvybyqsIppS+K9HC39N
Rmf0H7OfDGUtOE85s7bz28Y8UGuiixK1dDH3kvy5am2mfsIUVqz9hw0SlKdmw+zw
DDrifNBSf3PM/I0JztdveeKbHZ5BR5wPB2OOBeCOTX39lie+2eEZdMT5cDDmWADu
2NTXb3nimx2eQUecDwdjjgXgjk19y0pz1cJsfYJDtaT7l3vaF3WyRbeA2iwmFeej
4fjJ0dq7wo9nQzvgtIiTxqM2C0XF+WgUfnK0foObF0AQjUdtFoqK89Eo/ORo/QbH
FaApGo/aLBQV56NR+MnR+g3uXjq7ovGozUJRcT4ahZ8crd/g5scrRONRm4Wi4nw0
Cj85Wr/Bkb6D3HeexqM2C0XF+WgUfnK0foM7D9yTB+7+XrI4cPeuXw54VIO78+N8
Pv/+nAiNR20WiorzQUv9zTEbPJq8P24xu8JRT332/MYI7Y8nT3yzwzPoiPPhYMyx
vePq3byQpVtAbRaTivPRcPzkaH07+B3wWP5Pi8ajNgtFxfloFH5ytH6DY7WLBMfV
u0hwfKyKBEc8keC4ehcJjqt3keC4ehcJjqt3RBN59Y5o9q/6jfyiDY1HbRaKivNB
S/3NsWRfvR82pdmcrxqujdD+ePLENzs8g444Hw7GHNs7rt7NbCzdAmqzmFScj4bj
J0fr28HvgLsHvisaj9osFBXn83/snQecFMXyx/uiXD7gBJ6iHgiIiSwY0F18qKCA
iqKCAZSgIKIoImLgxAQGFMw+RAyYQVTE7AOfCcEIKoIBHyJBkmJYfSr/+W337PTV
1HILsvM/r+bH5+ir7tqu+c5291TPhtMofOcogwYHtEhwZO8iwbGsigRHPJHgyN5F
giN7B7icXM6Au28rEweO7F0WeMzL3t1reZt320RoPGqzUFScD0rqb7elO3tfWzjw
kId6fxuh9cnki29X+BqNOB8Oxm6rHtm7/ZYCegTUZjGpOB8Nx3eOMrDBb8ARSSQ4
ZrtIcECLBMeyKhIc8USCI3sXCY7sXSQ4sneR4MjeAS4ye3dvSB13fuMIjUdtFoqK
80FJ/e22dGfvbTucfMyRPb6J0Ppk8sW3K3yNRpwPB2O3VY/s3R34ED0CarOYVJyP
huM7RxnY4DfgiCQS3L5RAdF41GahqDgfjcJ3jjJocHuNh2g8arNQVJyPRuE7Rxk0
OKBFgiOeSHBk7yLBkb2LBEf2LhIc2bu9wNF41GahqDgfjcJ3jjIw8JiXvQMa1/OT
LmsaofGozUJRcT4oqb/dlu7svcOLa7IffzLM3hWfvdOjsEyfzWJScT4aju8cZWCD
34AjkkhwzHaR4MjeRYJjWRUJjngiwZG9iwRH9i4SHNm7SHBk77LAY172jpi4nu/1
wKc1933v+zzSot3AH5dEaH0y+eLbFb5GI86Hg7Hb6LCjvttL+kvV8Jc4wy9VS1G+
+HaFr9GI8+Fg7LYQ3NjUN2j54tsVvkYjzoeDsdtCcGNT36Dli29X+BqNOB8Oxm4L
wY1NfbeX9O0pXODs21NHVnaKix4BtVlMKs5Hw/GdowwsuzPgOpInGo/aLBQV56NR
+M5RBg1uf+ADovGozUJRcT4ahe8cZdDg9junIBqP2iwUFeejUfjOUQYNbr/oBNF4
1GahqDgfjcJ3jjJocHt5hWg8arNQVJyPRuE7Rxk0uMgvVQO4yC9VA7jIL1UDOG5P
QXLAYxrc7R/X80k/HRmh8ajNQlFxPiipv90WB4+l7/bUJYtzuz192uoIrU8mX3y7
wtdoxPlwMHZb9cje7USWHgG1WUwqzkfD8Z2jDGzwG3BEEgmO2S4SHNm7SHAsqyLB
EU8kuMgvVXOzd5HgIr9Uzc3eEU1k9o5ouJ4fWO+MCI1HbRaKivNBSf3ttnRn7/VP
fWf/tw5dG6H1yeSLb1f4Go04Hw7Gbqse2bu4r99xs3eR4O4Xsbii8ajNQlFxPhqF
7xxl0ODuZ1hd0XjUZqGoOB+NwneOMmhw9+3/rmg8arNQVJyPRuE7Rxk0OOKJBBf5
pWpu9m5/cpXGozYLRcX5aBS+c5RBg4v8UjU3e5cFHvOyd/dafuGRp0RoPGqzUFSc
D0rqb7elO3u/vM9jj/UY/12E1ieTL75d4Ws04nw4GLutemTv4r6Mxc3eRYJjtosE
B7RIcCyrIsERTyS4yC9Vc7N3keAiv1TNzd7tL9yh8ajNQlFxPhqF7xxlYOAxL3t3
b0j1evCECI1HbRaKivNBSf3ttnRn77se1nvydYvWRGh9Mvni2xW+RiPOh4Ox26pH
9u4OfIgeAbVZTCrOR8PxnaMMbPAbcEQSCW7fqIBoPGqzUFScj0bhO0cZNLi9xkM0
HrVZKCrOR6PwnaMMGhzQIsERTyS4yC9Vc7N3keAiv1TNzd7tBY7GozYLRcX5aBS+
c5SBgce87B3QuJ63GNorQuNRm4Wi4nxQUn+7Ld3Ze+T1Q569enqYvSs+e6dHYZk+
m8Wk4nw0HN85ysAGvwFHJJHgmO0iwZG9iwTHsioSHPFEgov8UjU3excJLvJL1dzs
XRZ4zMveERPX88daHBOh8ajNQlFxPiipv90WB4+lL3tfdkiLHh/nCM7ee9Z62XmS
+4w8fegTTjlrD2eYnbbuzi+GLWxV9tapbz53TfsPvy/6tMu4s2/eZ9hHt/Xocvzx
a5ose+zIuk+2Leo6fPqjK/YbdcWpa6+55Mt+9V/O/m/RqJzrTt1j7oVrRyy6f8SC
W9rvsfnXMRP+mP/9R/d8e8VupyrV8ODsqV8esfzstb8ddvZbO399+lu7v77bp59d
1ex/r759+ffj/9h4TWz5Ti/93OSP//x6/3tX5u5Y+8fR9WbdOLr0t9O7DP9gt3cm
jjl/j+uPObbxpTs0fq2o/ezZO9844bn5T5Su/7p5/qTmjXqXDhvw+J2X73dsw/MX
nnPLo21H9fz2uFt+qlXcfV777vNyD5k27vVm93aZfW3/Q0avfnv58VcsuO7+2vtd
feeCq85bvMvIV1aPeX3GspXHjFF/7Hbfw9Hoqe0+HnLN+eq6N0bUffCwF/75+9xD
rvri8paf3PHDgDbzvru3ZfmFX29sOuHY71/5pbDW0ytjJ52y+MfjG1w4+IqTO/a6
9YNP71z/XJ2Gx7170M9LB7Wu/+lFLQv+mHT/mK9/ue69X3/Yb9XzT14149Ev39rx
qZt+WjjrpjHTDrp85IvLz3zYKg58aNPnK2844Pv37l4f+2z1hHvvsYprJv5yaPvF
L/+86bfH1x9U9sEZOw+47J/9Xs0c1DpyRuyFPzK6vNT+2auuGjdr9f6Hlo58uMOS
20ve3qnLgkv3aNvhvLJpJ/S/qdf6Hb/4tMH8Pvc+/cuUNw9q+O8NzX6bteSnH34+
fsiNiwe+cOym8x47e/5De+xcf+odl9zR46Z/PPn0vzqce/F/Ziz8cYfPur33/f7T
X7v0iEvrXLXfvYsmTex3YIfRX04v+/L82Bt71ZlRPv6zw1eNn31Lh9+u3rH2pAab
Vjw0eP4Pz63u/P6vnzzx8Nra89vnPDTqxcxvf+74ZOYzD7aZMHflXcu/njD+xdMu
6vbnl60P6Nixzzd3vj17RcNbXur7+AU3zfvhqzee/v74XW65beqZm7oe3mN0+9Xz
3oxMWznk/Y+nDN5vwpQHzmz12Ob2Dy9vuddDG/ftM3DYgDrROhVYp0qd5RqzZr+z
zhuk8lVzZ7U80EnLJ5pbL5hAxaa0xr9Y4TTgHEF1VSvn/71yTy5oU1RQWho/RxnO
lr6NKlZlqrmzny10zuJQ53IwwPk9Q78Qnz1FjVU47Xq/i8fcaL7fIsN5jPlFHbbu
yEUzOh8cNabXpryFza23V/kBTvQ21sft5kTdB+E/u6eyxAfz6js/9dROCheu7sYd
6mH9PlV1UfrChh/bC3Kju7IfybVPjN/0QE/6iJTaMVGzq/Ozm8JRdUw8fqO50pRH
K9udLbtW/OtRumWgt+GZ89UC08Ohl/V/4YUX5plHuI9U6t0FkGcXqpnxMd893sP5
me+p9ysdg6ve0eS27uHcONEH6kP1kZqmOiv/d/VwwoiYed/IZX+O8Z8vtHs9FVrP
b1Xack9bEn0kFXymV+BZs4/mUbWP0ttb16cqPaLKVeUPFXBKrd986/eq+4X39Ghl
BpSpxbKpq46Ver8F1u9V9wtvygD/1GLZPVcdK/V+cTSuqu4X3jaDy5FaLFtVx4JS
6/evjSX3J7VY1XMs4Sf157x6jiXXN7VYtqqOBaXW718bS/BN/TmvnmMJvqk/59Vp
LDWtuEYho9B1XuZRf+jcekPn3h6pUG7uoan1+W+lBukqKKoL97EbI5mJuMgTtyxE
d3VRnHBf5+d71ThRi/6IIm7r73EKe0zsER9fxU6e2j1+rrR9ILEHEXsSsV8l9hpi
18uobHci9jnEvovYbxD7e2LvklnZ7krsC4l9H7HfJXaM2E2yKtvHEPsux+5hHy+x
vyf2LtmV7S7EHkHsqcReQOwYsZvkVLaPIfalxH6E2IuIvZnYe+dWtk8k9pXEfpLY
SxP21dbIZZQYudeYOXKtKceZcrraW+nstYXx9EnPxladtMMP8anofmskJiEOo8zY
kPs1exDaki8irqe/PdoJ/1e9qECpeaW2pNna+kc0NcvbfFLvbWoqFJa3PvHfveWt
jbW8NYkmfjVylzd9A3LL2qblLdHqX96qGF6J1hSGF04ip3B4pfoId3gtIPXh8AqH
l09b/wh3eJ2fOBj3ps7Fq5u1rvVEtwjq9E0Zf3J2912Qe2PIE27VpSr/8IKqGCTb
/xLnnoj3LA+o8r2qmdlbN8/cE5HK6dimE7H9Z4t7It6PW57EnogP4pan3tFecT2b
ZGps+UR4K2/V2qYTsTVTg54AV/yJ+DBuefprIyLtJyJ9I+KjuOVJ4IloEL8tgRvu
wIQaK1xRsVFxtBmlBrq50+7xF0ZMi5Hd3ijeT1wl7i9KlVfgZYx81THnw/yri4pr
98v5Kf/0ojWl+sWiUuchG9VVBmCpulvpd4vgWFGDEv3Tn41x/3TLPWuurQn1y1tu
fZkapRokHuEXfy13OTiVR/U5y1M75v678KW8lqUH5C4vvCOvoLRR7vzCJ/N2L81y
rttbf87wEl36ZZ8bqHnFzQovZWWo7s5PpvOzgz5y55C+T3h5L2u5L1I1P+w/dSfc
922kMDun0ud2K+s/arJznvKdHndRxWqAU3NKVnwKuF+U7/ySx5zpPROTbrJq7TTj
GcQ5jyuzohKFjr6lF4kSbl4g94OnnNCVO1Xc48Qj8Rg3MBJUTC6022mtK9cfsl8v
M8IRuSfX/X2zc7LipeEy9XOiKp70RlHOwUTWpU6E9e+69I4xUzWPtoqfwr5ZMzJa
x3/bRXXP3JapYJ9qKm8q3Js3vODwopal/8m7raBxUUHp43mXFRxY9HecCrs5R9DD
NxXO/N318qbC073qDG/S+Qtjb3SmgnnlPK6pUx+sVO60oCw+FbK2w1TYzW1kp4K/
D08Jt8pTIdkMhle6p4JzgtynwP19s3OyElPBrfurU2FNbqdsPRUezvo1K11ToZb6
OmdlCa6kObkFpfpKWlCqr6R/n6mgcwnv2cSRuF8SjPO9V5xjeKbORtxn1xtX0ei2
nF+XmZN7fjPVxlpvl56T/3ztsry1pV3zb629T1527db5l9ZWqm2WPr/ZzVM/v22z
sqt6XWM7iJ5fPQ4hfQZtuWfAzmbctjLVMk64Uekx/Y3zMzzO2c547F1RR+k3l2Tg
XswcU+2cb8dSJx0/eMTQgfuqcoU4+hgy4reO8tSyFji7iJ6vvsnGjl4fWbazWOWq
s53fznF+hjk/e2/Ts4tH6v798mYP8tDjcluWIg9t6cwc5KEoM2vc7Dn//2X23JH9
Vf61OeNLX8rOKuifM7B0YfbOBUfldMfqlGHOb7+tOL8Zqt8dzoGMdx6P8ivnQnBt
jlei/iWnfqAps5xtTP8cr0T9Qqce8VHu7NQfleOVqPefXz17rsra1tnTcLOePc2d
Nm724I1VeHucqnAfuU/882+HD73w3PMHXtB/4LD+A8sHDxsxcNgFg0dcXN68U4te
Lfbc9km1Ks2TKlN9V2un/PPzGxaU5B2S3yM/lr9H3gn57fOX5W/7kx4PkFbxTzq0
bU/6WPOkT0jypA9VeNJzKj3p2AnsV37WeYPok1us8OTObF8dntwhxUsK+5TcWDyh
+M/C9iWDix8qrle0a8mxziG22YbrYRvnetinRKklzvhFeaPTz5Bir0R9e6f+T1MO
duomFHsl6nd16usV6RLH8VCxV6I+2ZN7Q/62Prn3m+vhi4q/HuKNjkjn7esh7rX0
bm0uiM0UAulNpH/u5sYPLfmTnO7LYrHKzV1Z0sO5LCKZxE+d3E0lh+bu7pyRzMyt
vyxm6gekWfRJ1k8RdI/aX+kN/VGm3JISGySl+7ynHM+PQeiER2/Led+SavZ5303p
845yS9ryecejt/95bxCtqECEcRlXxBOivbDtRRfIn8aq8lw/nq1k9bbg4vphc15R
UaEWLVqk+vXrF7dRrlq1qtIG/u/gUxOVjDWV81HdfEKFCpV+ra3IVvoytU5Fs7z8
ERlhlReHUKFCVdI6VZrtpbCQO4uSXelSuRqGPqFP6PP39fGurbjSutfWZN6p9Bj6
hD7SfLxZ5BThLAp9Qp9t8PFmUbYK93mhQm2LvFmEl8HCWRQq1NbLm0V4v1U4i0KF
2np5swjv0ghnUahQW6+10YrolYk3f9yV+O2BxOfC9B39B1VDpe9A0PfvazvayfPA
m0Lsd7HoN4nMic5QF5fpt/LsqMxfCUhRvvds2BW+RiPOByX1t9vsjwhxvkHLF9+u
8DUacT4cjN0Wghub+gYtX3y7wtdoxPlwMHZbCG5s6hu0fPHtCl+jEefDwdhtIbix
qW/Q8sW3K3yNRpwPB2O3heDGpr5ByxffrvA1GnE+HIzdFoIbm/oGLV98u8LXaMT5
cDB2WwhubOobtHzx7QpfoxHnw8HYbSG4salv0PLFtyt8jUacDwdjt4Xgxqa+QcsX
367wNRpxPhyM3RaCG5v6Bi1ffLvC12jE+XAwdlsIbmzqu700Q72Zp28/4tam+0dK
6V//gOgRUJvFpOJ8NBzfOcr4qQjib3wZcPfd2q5oPGqzUFScj0bhO0cZNDj9kCWN
R20Wiorz0Sh85yiDBsf9eVs0HrVZKCrOR6PwnaMMGtx9YcMVjUdtFoqK89EofOco
gwa3l1eIxqM2C0XF+WgUvnOUQYPjzRW2aDxqs1BUnI9G4TtHGTS4+fsNiSFP41Gb
haLifDQK3znKwMBjGtztH6v7L7nZERqP2iwUFeeDkvrbbXHwWPr+ZOW4+89b/GXF
sgitTyZffLvC12jE+XAwdlv1yOXstIYeAbVZTCrOR8PxnaMMbPAbcO+1ei0aj9os
FBXno1H4zlEGDY7ZLhIcuZxIcCyrIsERTyQ4cjmR4MjlEE1kLodoWN3POW+fCI1H
bRaKivNBSf3ttnTncl+f2+aJogkrIrQ+mXzx7QpfoxHnw8HYbdUjl7Pv1NAjoDaL
ScX5aDi+c5SBDX4D7g58VzQetVkoKs5Ho/CdowwaHNAiwZHLiQTHsioSHPFEgiOX
EwmOXA7gInM5d2U/5z4VofGozUJRcT4oqb/dlu5crv2xJ92zb1l4X07xuZz94hM9
AmqzmFScj4bjO0cZ2OA34IgkEhyzXSQ4oEWCY1kVCY54IsGRy4kERy4HcJG5nLtZ
ndx0zSE0HrVZKCrOByX1t9vSncv1v3P56GcSf7qravni2xW+RiPOh4Ox26pHLme/
n4YeAbVZTCrOR8PxnaMMbPAbcEQSCW5vWyEaj9osFBXno1H4zlEGDW6v8RCNR20W
iorz0Sh85yiDBge0SHDEEwmOXM5+1mk8arNQVJyPRuE7Rxk0OHI5WeAxL5cDNFb3
ibe+VXNzuTZ/XLjzpB8WR2h9Mvni2xW+RiPOh4Ox26pHLkePwjJ9NotJxfloOL5z
lIENfgOOSCLBMdtFgiOXEwmOZVUkOOKJBEcuh5hyUhoDjlxOFnjMy+UQE6v7mtKF
NTeX++yIOUftcsaSCK1PJl98u8LXaMT5cDB2G11oqO/20pZzOftTT/QIqM1iUnE+
Go7vHGVgg9+AI5JIcMx2keDI5USCY1kVCY547i0qiMajNgtFxfloFL5zlEGDA1ok
OHI5WeAxL5dz3yW55tmSCI1HbRaKivNBSf3ttnTnct0ue7fVKz9/HaH1yeSLb1f4
Go04Hw7GbqseuZz7QW6IHgG1WUwqzkfD8Z2jDGzwG3BEEgmO2S4SHLmcSHAsqyLB
EU8kOK7qIsEB7b7OCtF41GahqDgfjcJ3jjIw8JiXy7kf/Jj+2CM1977cD9esmdxr
x48jtD6ZfPHtCl+jEefDwdht1SOX038EQ4seAbVZTCrOR8PxnaMMbPAbcEQSCY7Z
LhIcuZxIcCyrIsERD+ByruwGHLmcSHCkM7LAY14u5/5xq3rdFtTcXO4/j13xzNjx
n0VofTL54tsVvkYjzoeDsduqRy5n/wk0egTUZjGpOB8Nx3eOMrDBb8ARSSQ4ZrtI
cORyAJezzhtwAIsERzyR4MjlRIIjl5MFHvNyOYBjdR/zeFGExqM2C0XF+aCk/nZb
unO5Wj81WHzus+FrrIrP5VDnih4BtVlMKs5Hw/Gdowxs8BtwRBIJjtkuEhy5nEhw
LKsiwRFPJDhyOYDLSWkMOHI5WeAxL5cDOFb3E19dWXPvy2V/vv+H7/zyeYTWJ5Mv
vl3hazTifDgYu6165HIFCT8/HbVZTCrOR8PxnaMMbPAbcEQSCY7ZLhIcuZxIcCyr
IsERTyQ4cjmAy0lpDDhyOVngMS+XAzhW95H3zKy5udz6C296bUbdTyK0Ppl88e0K
X6MR58PB2G3VI5crTPj56ajNYlJxPhqO7xxlYIPfgCOSSHDMdpHgyOVEgmNZFQmO
eCLBkcsBXE5KY8CRy8kCj3m5HMCxuj/+cA3+ruDnJz/b66fjw+8KVnwuV5Tw89NR
m8Wk4nw0HN85ysAGvwFHJJHgmO0iwZHLiQTHsgpwORc4A454IsGRy4kERy4nCzzm
5XIAx+p+TafXa24u9+ub/32r1bjwu4IVn8sVJ/z8dNRmMak4Hw3Hd44ysMFvwBFJ
JDhmu0hw5HIiwbGsigRHPIDLubIbcORyIsGRy8kCj3m5HMCxun983OU1N5dr1LH+
5NHvvB+h9cnki29X+BqNOB8Oxm6rHrlcScLPT0dtFpOK89FwfOcoAxv8BhyRRIJj
tosERy4nEhzLqkhwxBMJjlxOJDhyOYCLzOUAjtX92mav1dxc7r7vyz79oHN4X07x
uVxpws9PR20Wk4rz0XB85ygDG/wGHJFEgmO2iwRHLicSHMuqSHDEA7icK7sBRy4n
Ehy5nCzwmJfLATz+/XIjnq25udx5+Xc+NXZG+NkHxedytRN+fjpqs5hUnI+G4ztH
GdjgN+CIJBIcs10kOHI5keBYVkWCIx7A5VzZDThyOZHgyOVkgce8XA7gWN2zv76r
5uZy/3imwRXlHRdGaH0y+eLbFb5GI86Hg7HbqkcuVyfh56ejNotJxfloOL5zlIEN
fgOOSCLBMdtFgiOXEwmOZVUkOOKJBEcuJxIcuRzAReZyAMfq/mF0Xc3N5epNubHB
To+En2NVfC5XN+Hnp6M2i0nF+Wg4vnOUgQ1+A45IIsEx20WCI5cTCY5lVSQ44okE
Ry4nEhy5nCzwmJfLARyre8sNc2puLrf3sztsWLGL6PfLXVym1G7Obzsqk8ulKN8R
2RW+RiPOh8Oz24I6FanKF9+u8DUacT4cjN0Wghub+gYtX3y7wtdoxPlwMHZbCG5s
6hu0fPHtCl+jEefDwdhtIbixqW/Q8sW3K3yNRpwPB2O3heDGpr5ByxffrvA1GnE+
HIzdFoIbm/oGLV98u8LXaMT5cDB2WwhubOobtHzx7QpfoxHnw8HYbSG4salv0PLF
tyt8jUacDwdjt4Xgxqa+QcsX367wNRpxPhyM3RaCG5v6Bi1ffLvC12jE+XAwdlsI
bmzqu72kX0reTVV+KblHZae46BFQm8Wk4nw0HN85yvipCOLeuwHXkTzReNRmoag4
H43Cd44yaHC82GCLxqM2C0XF+WgUvnOUQYPjpWRbNB61WSgqzkej8J2jDBrcfY+U
KxqP2iwUFeejUfjOUQYNbi+vEI1HbRaKivPRKHznKIMGx0vJtmg8arNQVJyPRuE7
Rxk0OF5KhkS9LRDgbv9Y3e/f3D9C41GbhaLifFBSf7stDh5L30vJb5T/csSPY9ZG
aH0y+eLbFb5GI86Hg7HbqkcuZ6c19AiozWJScT4aju8cZWCD34AjkkhwzHaR4Mjl
EE3OOm/AASwSHPFEgiOXEwmOXE4WeMzL5RANq/vU986L0HjUZqGoOB+U1N9uS3cu
98ri9zcu/Mf6CK1PJl98u8LXaMT5cDB2W/XI5ew7NfQIqM1iUnE+Go7vHGVgg9+A
uwPfFY1HbRaKivPRKHznKIMGB7RIcORyIsGxrIoERzyR4MjlRIIjlwO4yFzOXdnb
zhwYofGozUJRcT4oqb/dlu5cbsWYDwfnzg7vyyk+l7NffKJHQG0Wk4rz0XB85ygD
G/wGHJFEgmO2iwQHtEhwLKsiwRFPJDhyOZHgyOVkgce8XM7drD6z6IQIjUdtFoqK
80FJ/e22dOdylzc7uc/tS9ZEaH0y+eLbFb5GI86Hg7HbqkcuZ7+fhh4BtVlMKs5H
w/Gdowxs8BtwRBIJbm9bIRqP2iwUFeejUfjOUQYNjqVOJDigRYIjnkhw5HL2s07j
UZuFouJ8NArfOcqgwZHLyQKPebmce//9zl3OjtB41GahqDgflNTfbkt3Ljf6vU9+
fLr/ugitTyZffLvC12jE+XAwdlv1yOXoUVimz2YxqTgfDcd3jjKwwW/AEUkkOGa7
SHDkciLBsayKBEc8keDI5RBTTkpjwJHLyQKPebkcYsbvy+3UM0LjUZuFouJ8UFJ/
uy0OHktfLnfAEcMGnPDP8L6c4nM5+1NP9AiozWJScT4aju8cZWCD34AjkkhwzHaR
4MjlRIJjWRUJjnjuLSqIxqM2C0XF+WgUvnOUQYMDWiQ4cjlZ4DEvl3PfJfnlPedH
aDxqs1BUnA9K6m+3pTuXq7/r9HdeOi787IPiczn3g9wQPQJqs5hUnI+G4ztHGdjg
N+CIJBIcs10kOHI5keBYVkWCI55IcFzVRYID2n2dFaLxqM1CUXE+GoXvHGVg4DEv
l3M/+NH59hr8OdbDB84+7+06YS6n+FyuVsLPT0dtFpOK89FwfOcoAxv8BhyRRIJj
tosERy4nEhzLqkhwxAO4nCu7AUcuJxIc6Yws8JiXywEcq/v4wpERGo/aLBQV54OS
+ttt6c7lVqx4penEuWEup/hcLi/h56ejNotJxfloOL5zlIENfgOOSCLBMdtFgiOX
A7icdd6AA1gkOOKJBEcuJxIcuZws8JiXywEcq3vL60dFaDxqs1BUnA9K6m+3pTuX
Kzp43bcDa2+I0Ppk8sW3K3yNRpwPB2O3VY9cDnWu6BFQm8Wk4nw0HN85ysAGvwFH
JJHgmO0iwZHLiQTHsioSHPFEgiOXA7iclMaAI5eTBR7zcjmAY3U//sRzIjQetVko
Ks4HJfW329KdyxX8tnLkmsfCz7EqPpcrSPj56ajNYlJxPhqO7xxlYIPfgCOSSHDM
dpHgyOVEgmNZFQmOeCLBkcsBXE5KY8CRy8kCj3m5HMCxul/82OAIjUdtFoqK80FJ
/e22dOdyczr1anH0fmEup/hcrjDh56ejNotJxfloOL5zlIENfgOOSCLBMdtFgiOX
EwmOZVUkOOKJBEcuB3A5KY0BRy4nCzzm5XIAx+req0m3CI1HbRaKivNBSf3ttnTn
cu3zFky/7qrVEVqfTL74doWv0Yjz4WDstuqRyxUl/Px01GYxqTgfDcd3jjKwwW/A
EUkkOGa7SHDkciLBsawCXM4FzoAjnkhw5HIiwZHLyQKPebkcwLG631vYOULjUZuF
ouJ8UFJ/uy3dudzvq+d8d8sVqyK0Ppl88e0KX6MR58PB2G3VI5crTvj56ajNYlJx
PhqO7xxlYIPfgCOSSHDMdpHgyOVEgmNZFQmOeACXc2U34MjlRIIjl5MFHvNyOYBj
dX9oWg3+e6wlZ/w0a9as8O+xKj6XK0n4+emozWJScT4aju8cZWCD34AjkkhwzHaR
4MjlRIJjWRUJjngiwZHLiQRHLgdwkbkcwLG6tzqsBv891k3XD9o07e3w7z4oPpcr
Tfj56ajNYlJxPhqO7xxlYIPfgCOSSHDMdpHgyOVEgmNZFQmOeACXc2U34MjlRIIj
l5MFHvNyOYBjdf/u8R4RGo/aLBQV54OS+ttt6c7lPhraashlH4fvl1N8Llc74een
ozaLScX5aDi+c5SBDX4DjkgiwTHbRYIjlxMJjmVVJDjiAVzOld2AI5cTCY5cThZ4
zMvlAI7V/daZNfi+3AnZs6+u80l4X07xuVydhJ+fjtosJhXno+H4zlEGNvgNOCKJ
BMdsFwmOXE4kOJZVkeCIJxIcuZxIcORyABeZywEcq/uIiTX4c6zv5Hc5v8Wk8L6c
4nO5ugk/Px21WUwqzkfD8Z2jDGzwG3BEEgmO2S4SHLmcSHAsqyLBEU8kOHI5keDI
5WSBx7xcDuBY3c+qNyJC41GbhaLifFBSf7st3bncs2uf/2PBWMF/w6tnrUOcK1mf
kacPbeGUd3Z1htlp6yYfPWxhtOzNh8f0yzj0+HPuO2ZZ5j4njR3wVNedevYa0rnz
XhmPvz3+ixHjnrqyf6fX8hY/M/DDnA6r6zXqMafo+YzGCwYMbfvUWy3PKb3vqid7
HvTzmWM23DhmU7PZjY8++8lzNmT2X/vFrv1vm3HQy41n/7LmpWkZGzocdfpZJXv/
96q7Y680L365/pgjL/tz5GFD72j3x8dDTruj09Kj9lo1us6sr0fuM3/k5HHPvXTZ
wT+UrC6rfXub2q+22fHru8/67qCPhzwzovyJ2y98++AndxnV6c7siYd/eP33R7/7
0y6DXzx2wJCf1x/36tCne7x9z/0Dzj5s3uiRZS/c1/eb4+YVv9Byac/P39l/525n
7vjClY80f/2sxtkzs176bNa4xW1jTRedu+D3Rj9W7PnIMw8deO99qrxvt097n3Lr
S/d9cdDTT5zw3PJ/HXVxu52m/dTyoNKXnn/m/cs6jPnqkrfLPhv42bcHtZ+y49Uv
fjK3+13vFNz/cMcDH9vh85sKf1m84ZcfXnhw/dA9T+1x4ql9T33vu0lPrr1y/EE/
5ixq+9ZbF75+/KmnTDpn4rnHXrhRlRy5Q8nGqSOq/KVtSVb9SzcUv3LM+w3f6phZ
srGcOvC/tNr09qwfTv318f++/OYD7yz/pOC5XVb0vWXz0zNmnjrolsXr37z+vPUz
Y9P/PL/0wGGLx10z5eze07+fMLyrOqpeg1qb3n39lBVT6p9c8OmyVWfnDdv5hkUf
NfjikvnL1pX0nZ15QZ/+Y1b8cPXiNeO7LzmrweQbb7t44cIb235w1CsXPLzHDee/
c8glLeqPaHf2yJYHHHd+x/GPt3ql8cWTBt62bmbDwrKFj3648ON93jnqP++fOPH8
Z7P6ntJlxGPzu9Yfu+fjO1/T6fRXF7U77aMf5o94bPiXd/94zD+fWNqm1cer9rrz
oIUv/+POzgMnzyypuzBrYZOlfbvdEunQfcJNkffadB+x9NKH5v388LuPLhzw5y9n
fBE7uvstF3TacNGUAT8+uHmPg78YdcLoRw5edNqx50ZLfsy/IXf0vSt7HN1hym1f
9v3j87pv7vfUpiajLpiz+/tfrPzj86w1FXvevbTr2G++ebXf4Ode6t4/95Up3Xr8
enTxgvdmnfv6cTsePqrREfs/s7lu7beX9+gzcNiAOtE6Ffr16bx4ktD+rPMGOVuj
5s56faAzqSaaWwGYwsWmtGagWOE04BxBdVUr5/+9ck8uaFNUUFo7fo4yVBPVRtVR
parc2V/hK7JGOBekAc7vGfHsW2VPUWOVfhcUusFjbjR/XTZDNXd/US1fXHX/9S0O
jRrTa1Pe0urW29eZAU70NvFHaM2Jug/Cf3ZPZfG/9ImaBs5PPbWTwqXzWOMO9bR+
n6q6KH1pxY/tBbnRXdmP5Nonxs8MetJHpNSOiZpy56eR81NfdUw8fqO51u0VrWxH
LbsWEh91TAZ6uzDzE/Wp6eHmrr0/vvyxW8wj3Ecq9e4CyLML1cz4mD823sPIzM/U
kkrH4Kp3NLmte7goTrRUfa6+UNNUZ6Wz8KqElxRn3jdy2Z9j/OcL7V5PhdbzW5W2
3NOWRB9JBZ/pFXjW7KN5VO2j9HbL9alKj8SfcTzzW1Jq/dp/FaXqfuE9PVqZAWVq
sWzqqmOl3q/9beBV9wtvygD/1GLZPVcdK/V+cTSuqu4X3jaDy5FaLFtVx4JS6/ev
jSX3J7VY1XMs4Sf157x6jiXXN7VYtqqOBaXW718bS/BN/TmvnmMJvqk/59VpLDWt
uEYho9B1Xubx1ct3jzqh3aS4rXMPTa3Pfys1SFdBUV24j90YyUzELYsfxZaE6K4u
ihPu6/x8rxonatEfUcRt/T1OYY+JPeLjq46Tpx4bP1fa7kLsMcR+lthrid04o7Ld
m9g3E/tNYv9B7LaZle0hxJ5K7E+JXZRV2e5M7Hsdu6dlf0zswuzK9qHEvpjYTxL7
W2I3zKlsH0fs8cSeQ+xfiL1vbmV7ALHvJvaHCftqa+QwSoyca8wYvdaU40w5Xe2t
dPbYwnj6pGdDq07a4Yf4VMD9WAiTAIdRZmwIf63VFdqST2LX098e7YT/q57UUGpe
qS0ptrb+EU3N8vIJqfc2FRUKy0uf+O/e8tLGWl6aRBO/GrnLi74FuWVt0/KSaPUv
L1UMr0RrCsMLJ5FTOLxSfYQ7vD4l9eHwCoeXT1v/CHd4jUwcjHtT5eLVzVrXeqJb
BHX6pog/Obr7Lmhe3McWbpWlKv/wgqoYJNv/EueeiM8sD6jyvaKZ2Vs3z9wTkcrp
2KYTsf1ni3silsQtT2JPxNK45al3tFdczyaZGls+Ed7KW7W26URszdSgJ8AVfyI+
j1ue/tqISPuJSN+I+CJueRJ4IhrEbwvghjcwocYKV1RsVBzF/+KvBrq50+7xFyZM
i5Hd3sj77gTr65HKK3ZV8GuR82F+i+IVpT1zfsrPL55bql+sKXUeslFdZQCWqrud
//FiCI4VNSjRP/3ZGPdPt9yz5tqasLRSfZkaFX/ZJpn4a7nLwak8qs9ZnmqQe2bh
7LyWpR1zry+clFdQ2iT3gsLH8nYvzXKu21t/zvASWfplnxuoecXNzv/lzhEc6/xk
Oj876CN3Dml9wst7Wcl9kejMSOOC8xqsjhRm5+iX61jNU/c55ynf6bGJqqMGODX9
suJTwLyQh1/ymDO9Z2LSTVatM/QLb+VuY2ZFJQodfUsv0iTcvECw9BPkF7pyP5rq
/i0LPBKPcQMjQcXkAoed1rpy/SH79SojHJF7ct3fNzsnK14aLlM/J6riSW8U5RxM
ZF3qRFj/rkvvGDNV82ir+Ck8IeuizNbx35qoaOa2TAX7VFN5U2Fa3vCCfxa1LJ2X
d1vBbkUFpU/lXVbQoejvOBUaOUfQ0zcVTv/d9XKnQsPo5jPqfXrFn/819kZnKphX
ruOaOvXBSuWO04riUyFrO0yFRm4jOxX8fXhKuHlOsJLNYHi5U8Hcud3uU8E5QYmp
YH7f7JysxFRw6/7qVFie+3mWngpPZdXJTtdUqOVcSVeW6CtpQam+khaU6ivp32cq
6FzCezZxJLD0qIl22ivOcWGmzkbcZ9cbV9Hotpxfl5mTe34z1cZaU0rPyZ9Quyzv
tdKu+UNq75O3pLR1fk9naLXN0uc3u3nq57dtVrb3fpG0iZ5fPQ4hfQZtuWfAzmbc
tjLVMk64QOkxPcf5GR7nbGc89q7Ap3Tw5o4M3IuBQ1z7xO/MnHT84BFDB+6ryhXi
6GPQb77JU8ta4Owier76Jhs7en1k2c5ilavOdn47x/kZ5vzsvU3PLh6p+/fLmz0d
nTz0uNyWpf2cPLSlM3OQh6LMrHGzZ+T/y+y5I/ur/Gtzxpe+lJ1V0D9nYOnC7J0L
jsrpjtUpw5zffltxfjNUvzucAxnvPB7lV86F4Nocr0T9S079QFNmOduY/jleifqF
Tj3io9zZqT8qxytR7z+/evZclbWts6fhZj17mjtt3OzBG5sy1C5KVbiP3AeWOnzo
heeeP/CC/gOH9R9YPnjYiIHDLhg84uLy5p1a9Gqx57ZPqlVpnlSZalWtevnn5jco
KMw7MP+o/B/zm+T1zG+b/3n+tj/p8QBpFf+kQ9v2pI81T/qEJE/6CIUnPafSk46d
QPvys84bRJ/cYoUnd2b76vDkDileUtin5MbiCcV/FrYvGVz8UHG9ol1LjnUOsc02
XA/bONfDPiVKLXHGL8obnX6GFHsl6ts79X+acrBTN6HYK1G/q1Nfr0iXOI6Hir0S
9cme3Bvyt/XJvd9cD19U/PUQbzREOm9fD5HP9m5tLojNFALpTaR/7ubGDy35k5zu
y2Kxys1dWdLDuSwimcRPndxNJYfm7u6ckczMrb8sZuoHpFn0SdZPEXSP2t/5v9z5
OdqUW1Jig6R0n/eU4/kxCJ3Knf+25bxvSTX7vDdS+ryj3JK2fN7x6O1/3htEKyoQ
YVzGFfGEaC9se9EF8qexqjzXj2crWb0tuLh+2JxXVFSoRYsWqX79+sVtlKtWraq0
gf87+NREJWNN5XxUN59QoUKlX2srspW+TK1T0Swvf0RGWOXFIVSoUJW0TpVmeyks
5M6iZFe6VK6GoU/oE/r8fX28ayuutO61NZl3Kj2GPqGPNB9vFjlFOItCn9BnG3y8
WZStwn1eqFDbIm8W4WWwcBaFCrX18mYR3m8VzqJQobZe3izCuzTCWRQq1NZrbbQi
emXizR93JX57IPG5MH1H/0HVUOk7EPT9+9qOdvI88KYQ+10s+k0ic6Iz1G2lSpUr
/R7/+LfGpyjfezbsCl+jEeeDkvrbbfZHhDjfoOWLb1f4Go04Hw7GbgvBjU19g5Yv
vl3hazTifDgYuy0ENzb1DVq++HaFr9GI8+Fg7LYQ3NjUN2j54tsVvkYjzoeDsdtC
cGNT36Dli29X+BqNOB8Oxm4LwY1NfYOWL75d4Ws04nw4GLstBDc29Q1avvh2ha/R
iPPhYOy2ENzY1Ddo+eLbFb5GI86Hg7HbQnBjU9/tpRnqgWJ9awLfe+P+QTv6zfwQ
PQJqs5hUnI+G4ztHGT8VQfwFIAPuvpPTFY1HbRaKivPRKHznKIMGpx/AovGozUJR
cT4ahe8cZdDguHdni8ajNgtFxfloFL5zlEGDuzc9XdF41GahqDgfjcJ3jjJocHt5
hWg8arNQVJyPRuE7Rxk0OF54hdxnnsajNgtFxfloFL5zlEGDu9/QIw7c/aSqOHD3
9Rpx4O7XHIoDd78HUhw4PnsOyQGPaXC3f6Su37XOiNB41GahqDgflNTfbouDx9L3
1zrb3T3s3IObLYvQ+mTyxbcrfI1GnA8HY7dVj42qvWejR0BtFpOK89FwfOcoAxv8
BhyRRIJjtosEx0ZVJDiWVZHgiCcSHBtVRJOT0hhwbFRFgmOjKhLc/fpLceDuOy3F
gbt/l0EcODaqssBj3kYV0ZC6rvz8o0NoPGqzUFScD0rqb7ele6N6w9Jm30w+eUmE
1ieTL75d4Ws04nw4GLutemxU7dfY6BFQm8Wk4nw0HN85ysAGvwF3B74rGo/aLBQV
56NR+M5RBg0OaJHg2KiKBMeyKhIc8QAu58puwLFRFQmOjapIcPdjXuLAsVEVCY6N
qkhwbFRFgrvf5i0HPOZtVN20dY8+dSI0HrVZKCrOByX1t9vSvVHtUpb9Seej3L9Q
VrV88e0KX6MR58PB2G3VY6NqvyeSHgG1WUwqzkfD8Z2jDGzwG3BEEgmO2S4SHNAi
wbGsAlzOBc6AI55IcGxURYJjoyoSHBtVkeDYqIoEx0ZVJDg2qiLBsVGVBR7zNqru
ywyn1SuL0HjUZqGoOB+U1N9uS/dGtfjmb9+ZPzbcqCp+o+oOfIgeAbVZTCrOR8Px
naMMbPAbcEQSCW7fk4NoPGqzUFScj0bhO0cZNLi9xkM0HrVZKCrOR6PwnaMMGhzQ
IsERTyQ4NqoiwbFRFQmOjapIcGxURYJjoyoSHBtVkeDYqMoCj3kbVYAjdf3xkV9q
7lt/yw9ZdeOuP30ZofXJ5ItvV/gajTgfDsZuqx4bVXoUlumzWUwqzkfD8Z2jDGzw
G3BEEgmO2S4SHBtVkeBYVkWCI55IcGxURYJjo4qYbj5H41GbhaLifDQK3znKoMGx
URUJjo2qSHBsVEWCY6MqEhwbVVngMW+jiphIXYdeuqnmblR73nrGmBvPDTeqit+o
ut8RCdEjoDaLScX5aDi+c5SBDX4DjkgiwTHbRYJjoyoSHMuqSHDEEwkOaPtVVRqP
2iwUFeejUfjOUQYNjo2qSHBsVEWCY6MqEhwbVZHg2KiKBMdGVRZ4zNuoAhyp61NL
V9bcjeoup07YbeT/Po/Q+mTyxbcrfI1GnA8HY7dVj42q+53+ED0CarOYVJyPhuM7
RxnY4DfgiCQSHLNdJDg2qiLBsayKBEc8keC4qtvvgqXxqM1CUXE+GoXvHGXQ4IAW
CY6NqkhwbFRFgmOjKhIcG1WR4NioygKPeRtVgCN1vWT4oREaj9osFBXng5L6223p
3qjefXeD41r2WBWh9cnki29X+BqNOB8Oxm6rHhtV92+wQfQIqM1iUnE+Go7vHGVg
g9+AI5JIcMx2keDYqIoEx7IqEhzxRIJjo2p/apHGozYLRcX5aBS+c5RBgyOdEQkO
aJHg2KiKBMdGVSQ4NqoiwbFRlQUe8zaqAI9/8+/DNfitv6WfNO66bET41l/Fb1Td
v5kN0SOgNotJxfloOL5zlIENfgOOSCLBMdtFgmOjKhIcy6pIcMQTCY6Nqv0tMzQe
tVkoKs5Ho/CdowwaHBtVkeDI40SCA1okODaqIsGxURUJjo2qLPCYt1EFePw1lt16
19yN6mkTZ/+8bPf5EVqfTL74doWv0Yjz4WDstuqxUcWS54oeAbVZTCrOR8PxnaMM
bPAbcEQSCY7ZLhIcG1WR4FhW7e+IpPGozUJRcT4ahe8cZdDgiCcSHBtVkeDYqIoE
x0ZVJDgSWJHggBYJjo2qSHBsVGWBx7yNKsCRur70XXGExqM2C0XF+aCk/nZbujeq
j0/8ts9FX3wdofXJ5ItvV/gajTgfDsZuqx4bVcx8V/QIqM1iUnE+Go7vHGVgg9+A
I5JIcMx2keDYqIoEx7Jqf6c/jUdtFoqK89EofOcogwZHPJHg2KiKBMdGVSQ4Nqoi
wbFRFQmOzF0kOKBFgmOjKgs85m1UAY7Udf1n/665r6iuvfLFZw/+36cRWp9Mvvh2
ha/RiPPhYOy26rFRxQRwRY+A2iwmFeej4fjOUQY2+A04IokEx2wXCY6NqkhwLKsi
wRHP/uNzNB61WSgqzkej8J2jDBocG1WR4NioigTHRlUkODaqIsGxURUJji2LSHBA
ywKPeRtVgCN1Pa/+OzV3o3pnm9t3WH/oZxFan0y++HaFr9GI8+Fg7LbqsVEtct2U
n47aLCYV56Ph+M5RBjb4DTgiiQTHbBcJjo2qSHAsqwCXc4Ez4IgnEhwbVZHg2KiK
BMdGVSQ4NqoiwbFRFQmOjapIcOzVZIHHvI0qwJG6bjroo5q7UW3St/jUy49YEqH1
yeSLb1f4Go04Hw7GbqseG9Vi10356ajNYlJxPhqO7xxlYIPfgCOSSHDMdpHg2KiK
BMeyKhIc8QAu58puwLFRFQmOjapIcGxURYJjoyoSHBtVkeDYqIoEx0ZVFnjM26gC
PP71Km0m19yN6sa9Hjis0zULI7Q+mXzx7QpfoxHnw8HYbdVjo4o6V/QIqM1iUnE+
Go7vHGVgg9+AI5JIcMx2keDYqIoEx7IqEhzxAC7nym7AsVEVCY6NqkhwbFRFgmOj
KhIcG1WR4NioigTHRlUWeMzbqAIcqevug4siNB61WSgqzgcl9bfb0r1R/WRi1wFN
pov+MqXbSpVq5PxWW5mNaoryHZFd4Ws04nw4PLstqFORqnzx7QpfoxHnw8HYbSG4
salv0PLFtyt8jUacDwdjt4Xgxqa+QcsX367wNRpxPhyM3RaCG5v6Bi1ffLvC12jE
+XAwdlsIbmzqG7R88e0KX6MR58PB2G0huLGpb9DyxbcrfI1GnA8HY7eF4MamvkHL
F9+u8DUacT4cjN0Wghub+gYtX3y7wtdoxPlwMHZbCG5s6ru9NEO9W0vfmsAtZ/c1
9J6VneKiR0BtFpOK89FwfOco46ciiPtyBlxH8kTjUZuFouJ8NArfOcqgwXEj0haN
R20Wiorz0Sh85yiDBsdr6LZoPGqzUFScj0bhO0cZNLh7z90VjUdtFoqK89EofOco
gwa3l1eIxqM2C0XF+WgUvnOUQYPjNXRI1KstAHf7xyLXa+jgCI1HbRaKivNBSf3t
tjh4Gl9tmd9wv6nX7bsuQuuTyRffrvA1GnE+HIzdVj1SGvvqTo+A2iwmFeej4fjO
UQY2+K2URiQ4ZrtIcKQ0IsGxrIoERzyR4EhpEE1kSoNoWOTmPzAgQuNRm4Wi4nxQ
Un+7Ld0pzexTjzzp4lvXRmh9Mvni2xW+RiPOh4Ox26pHSmPv2+kRUJvFpOJ8NBzf
OcrABr+V0ogEB7RIcKQ0IsGxrIoERzyAy7myWymNLHArpXEXuOWbBkVoPGqzUFSc
D0rqb7elO6Upbzfp3Eu/DFMaxac09h15egTUZjGpOB8Nx3eOMrDBb6U0IsEx20WC
A1okOJZVgMu5wFkpjUhwpDSywK2Uxt26bG59ZoTGozYLRcX5oKT+dlu6U5qdT+j3
TeTbMKVRfEpjv9ZOj4DaLCYV56Ph+M5RBjb4rZRGJLi9e4NoPGqzUFScj0bhO0cZ
NLi9xkM0HrVZKCrOR6PwnaMMGhzQIsERTyQ4UhpZ4FZKA3Ascs0yj4nQeNRmoag4
H5TU325Ld0qzod4xczurNRFan0y++HaFr9GI8+Fg7LbqkdLQo7BMn81iUnE+Go7v
HGVgg99KaUSCY7aLBEdKIxIcy6pIcMQTCY6URha4ldIgJha5qy44L0LjUZuFouJ8
UFJ/uy0OnsaU5uBxbSacV7w+QuuTyRffrvA1GnE+HIzdRocd9d1e2nJK474/HqJH
QG0Wk4rz0XB85ygDG/xWSiMSHLNdJDhSGpHgWFZFgiOeSHBA23dqaDxqs1BUnI9G
4TtHGRi4ldK4bySadGD3CI1HbRaKivNBSf3ttnSnNK/v1bdrz4dXR2h9Mvni2xW+
RiPOh4Ox26pHSoNvj3VFj4DaLCYV56Ph+M5RBjb4rZRGJDhmu0hwpDQiwbGsigRH
PIDLubJbKY0scCulATgWuTH3Xxah8ajNQlFxPiipv92W7pSm6I9VS4+etSFC65PJ
F9+u8DUacT4cjN1WPVIafC+8K3oE1GYxqTgfDcd3jjKwwW+lNCLBMdtFgiOlEQmO
ZVUkOOKJBEdKA3CRKQ3AschtPPOcCI1HbRaKivNBSf3ttnSnNHt9uKLkzyfC76VR
fEqDOlf0CKjNYlJxPhqO7xxlYIPfSmlEgmO2iwRHSiMSHMuqSHDEEwmOlAbgIlMa
gGORm/nR2REaj9osFBXng5L6223pTmn+nP1L8Qmjw5RG8SkN/pabK3oE1GYxqTgf
Dcd3jjKwwW+lNCLBMdtFgiOlEQmOZRXgci5wVkojEhwpjSxwK6UBOBa5/zUaHqHx
qM1CUXE+KKm/3ZbulGbJTrufG2kSvj1Y8SkN/kqrK3oE1GYxqTgfDcd3jjKwwW+l
NCLBMdtFgiOlEQmOZRXgci5wVkojEhwpjSxwK6UBOBa5t888K0LjUZuFouJ8UFJ/
uy3dKU1+1oKcXwvDuzSKT2nw99dd0SOgNotJxfloOL5zlIENfiulEQmO2S4SHCmN
SHAsqyLBEQ/gcq7sVkojC9xKaQCORW6nL2rw33g6+7F/dX3goDClUXxKU5Tw89NR
m8Wk4nw0HN85ysAGv5XSiATHbBcJjpRGJDiWVYDLucBZKY1IcKQ0ssCtlAbgWOS6
Zh8bofGozUJRcT4oqb/dlu6U5ueJ08rHl4dftaf4lKY44eenozaLScX5aDi+c5SB
DX4rpREJjtkuEhwpjUhwLKsiwREP4HKu7FZKIwvcSmkAjkVuXZdhERqP2iwUFeeD
kvrbbelOaZrdMnziLvPCuzSKT2lKEn5+OmqzmFScj4bjO0cZ2OC3UhqR4JjtIsGR
0ogEx7IqEhzxAC7nym6lNLLArZQG4Fjk3u91aoTGozYLRcX5oKT+dlu6U5qHxx2y
4oXHvovQ+mTyxbcrfI1GnA8HY7cFldL0rHWMs6D3GXn60KhTnnS4M8xOW3fy/GEL
o2X3HBPNPP7DHVYcu2yHfiWT3nhzcJdOQzp33ivj8bef+mLkuLN3uCQ7799zS8oe
/T3noBOGlvadc92+/47eOW/xoDPe3/+c0vXPv3LbkvE3Xbb+nkve6zZ0Wofpz91+
UUajHx8cf8wDGybUW/3dw+u6XzDugRn/uOaTRzq1POvDr67/8fUdfnvrho3/y/lt
SdnGDis37V8w5NNRH9zW5Ky3vtivcP7wWrP/N7HBrx36f1Tr2W5X7TbuiJMe6H/J
A5+tvXvprUMaHLR409o5Ba81qbX7R727Xd5nxoZWH3Xf8dGDRh3z+vxmS4ueeuDI
2Q8e2X5mreH/7PvG8nkjZ75/eNtde0/u1WTIYZ83OvbqBkdfrT7rNPKA1e3emTLx
3vG/Fcz76qpdG7dY8/KjPxbmZH5Tf+GFZS3fefeDndb+4/An//3d/Dt+GNWxx6eR
f0UXvPZevZ+/+P2yDbX/+86U/v0vP+OWU+97/eq80/o/+nLFy3MGPLlLv3u7rH/q
3g0rL2j98lPvfb+i8PKT5i/v1rf9Dnetr7hXTTng/Ut3f+rcE2vHTtip+JBVV1xZ
MnrZsit33T82dYeUzVEjb3iy/+Xtbn9ht41jpuX/965NC567d9z/Ro6/ca/TPh7+
yM5rDj/muUknXthwzTUv1l40/Zteu1z74n3Dsi/c++Jeb9037JGd77nvxba7f/fT
wHvPvXDXDlN+Ou2l9vOe+/Xyvl//cEqnhT98/vh9XU/+8dSyi5p+euUHw/9T/I+L
Z5z+Y7MdPrp90K3tuhz3w/SrPn99Sv3jbvuqUekl923oMu6w6X80/mX2VTvf+PMl
V3ScPuLVJ/448KHRPw5sfewZ76059LM1418/YNFRL0x7/Ijxd6yeO//EJxq9svTp
3Hm3dXur5fd7ddv7jPr/OPyL/O/m3nz2gW1HL7nx/Rfe+O/KE2uf+dkVRxc0OmKv
Pf5oXPDwi6c3aL5p2oNdj/qz70cTL3219bt7Pn3SgwNf/2b9+a07DBre9ox6T9zw
5Krli36uOGfSPS2H3rL5ue7FxcUrP2vWePrkc57+efDwb9vvufm0fers/Wz3Wcds
6DtlwOsPnnncwRNHnfJTv3Vzlxz3bu6irJ/KOo8f/dWRJx7dZNcTX6l72VcPvN50
9MaOo567cfzKYV83/6XiwM6nvPtTk07nD+/87Ky1l594d6dTjm7T7H+TZk++673p
yx7Nb3jIbcVnTtisOo5Xy/sMHDagTrROBdbOOs5GATO5w1nnDVL5qrmzgh/oTLOJ
5oKCSY2dY7om999NOA04R1Bd1cr5f8/cUwtaFxWV1omfowxVrtqoUue0NnE2HoXO
WRztXKIGOL9nxNNSlT1FjXWKUqU3JnjMjebrZzJUc/cXNfLKPX/o3SEaNabXprzF
1q23rzwDnOht4o/QmhN1H4T/7J7K4l/+gpp/OD/11E4KF9Nexh06wfp9quqi9MUW
P7YX5EZ3ZT+Sa58Yf7MMetJHpNSOiZrGzs/uzk991THx+I366hc9IVrJVodadq34
FzJOykBv92Z+rf5rehg3os9ha7Pv+rfnqXX3XdD3CbtQzYyP+VviPUzN/EatqHQM
rnpHk9u6h8viRN+qlWqVmqY6q8p/3yGZ6jg/M+8buezPMf7zhXavp0Lr+a1KW+5p
S6KPpILP9Ao8a/bRPKr2UTobdX2q0iPOjNHP/JaUWr/2Z0Kr7hfe06OVGVCmFsum
rjpW6v3aHwKpul94Uwb4pxbL7rnqWKn3a7/5sep+4W0zuBypxbJVdSwotX7/2lhy
f1KLVT3HEn5Sf86r51hyfVOLZavqWFBq/f61sQTf1J/z6jmW4Jv6c16dxlLTimsU
Mgpd52Uel5TNOOLr0bdGKpSbe2hqff5bqUG6Corqwn3sxkimFbdJ4jdeiO7qojjh
vs7PHvFRUuow9IoTaztK7OHEvp/YHxE7K6Oy3Y7YA4h9G7HfJPbPxN4js7J9ErHH
EfsFYq8m9k5Zle2jiD3ZsU+w7AXE/oPYLbIr26cR+yZizyH2RmI3yqlsH0vsscR+
htjLiV2WW9k+jNgXEvshYn+asK+O59lJFXFbrzEj9VpTjjPldLW30jlkC+Ppk54T
rTpph6ZmIn1teUBe+lyhMJH6xH/3JlIbayI1iSZ+NXInkr79tmXxE+l760RgYlK5
rb/HlwN7cbUfqaJb88gqTn6iNYWTj+eSU+WT/0P8JOJeMYR1CD5lxob8Xxem//fL
9fS3Rzvh/6rXVSg1r9RWdVtb/4jK50ZFw3PjyZ20/yX14aT1y20NJ+1WD7Otf0Q4
aZPLnbRTEwfj3up68LmB0yfk9YigTt+q8qes2nde3McWbmCmKv+khaqYQOlLOb6x
PKDKd/BmZm/d6uWeiFROxzadiO2/krgnYkXc8iT2RHwbtzz1jvaK69kkU2PLJ8K7
nlWtbToRWzM16AlwxZ+IlXHL018bEWk/EekbEavilieBJ6JB/GYNXoZwr4iNFa6o
2Dg6in8Zmwa6udPu8ZeLTIuR3d4o/gJXXNb7kcordlXwOyhnYf6VRaW1++b8kt+3
aG2pfgmtjvOQjeoqA7BU3a303yfAsaIGJfqnPxvj/umWe9ZcWxOWVqovU6NUg8Qj
/OKv5S4Hp/KoPmd5asfc5YXP57UuPSB3h6Jb84pKG+VuKHwir2lplnPd3vpzhhcu
0y/73EDNK25WGFUZqpfzk+n87KCP3DmkjQkv78U+96W7c+a222HQc99GCrNz9Iuo
rGarO5zzlO/0WO48LwOcmn5Z8SlgXl7FL3nMmd4zMekmq9ZOM57BxFFnVlSi0NEx
rZIp4eYFggVMtyO7Q3SFKQd1NiUeice4fpiOmFzgsNNaV64/ZL+KaIQ47sl1f9/s
nKx4aQ7D1M+JqnjSG0U5BxNZlzoR1r/r0jvGTNU82ip+Ck/O6pXZOv5buZqcsS1T
wT4zVN5UuC/v4YLORa1L38ibX1BeVFQ6Pe+Zgv2L/o5TYXfnCE7wTYUBv7te3lRY
2Oz+dTkdlmrbqS/MNu8niGvq1AcrlQ0/LYlPhSyV7qng78NTws1zgmUPbbtDeLlT
wX3DujfMtP7qVHBOkPsUuL9vdk5WvMRhuHV/dSqszJ2SpafCE1m/ZKVrKtRS3+Ss
LsGVtFZuUam+khaV6itp622YCq3j/ukWJdO5hPds4khg6VET7bRXnOPeTJ2NuM+u
N66i0W05vy4zJ/f8ZqoNtd4uHZr/fO26eWtLu+TfWnvvvOzarfIvra1U2yx9frOb
p35+22Zle+/iSZvo+dXjENJn0JZ7Buxsxm0rUy3jhBuVHtPfKLygBM52xmPvCswx
vOUmA/di5phq53w7ljrp+MEjhg7cV5UrxNHHkBG/rZanlrXA2UX0fPVNNnb0+siy
ncUqV53t/HaO8zPM+dl7m55dPFL375c3e5CH9sxtXYo8tIUzc5CHosz8G11IUps9
U/9fZs+k7J4FY3N2Lp2dPbLgtJxfSt7LnlBweM5Xzo6gVYY5v/224vxmqH6TnAPZ
2RmqKHsW4AU0r0T9bKf+lxJdjnTqT8vxStS/59QjPsoJTv3hOV6Jev/51bPnqqxt
nT0NN+vZ09xp42YP3m6WgWegwn3kPvHn4/ChF557/sAL+g8c1n9g+eBhIwYOu2Dw
iIvLm2/7fFqV5vmUqdbUKs8fnt+4oDivc373/D/zm+Wdkr9f/rf52/58xwOkVfzz
DW3b8z3OPN8TkjzfoxWe75xKzzc2AR3KzzpvEH1yixWe3Jntq8OTO6R4SWGfkhuL
JxT/Wdi+ZHDxQ8X1inYtOdY5xDbbcCls41wK+zgTbokzflHe6PQzpNgrUd/eqf/T
lIOdugnFXon6XZ36ekW6xHE8VOyVqE/25N6Qv61P7v3mUvii4i+FeOcnMnn7Uojb
LL1bm2thM4VAev/on7u58UNL/iSn74rYIFpRER+9GVfErw17YQeALnApGavKc/3n
0layeltwcf2wT6moqFCLFi1S/fr1i9soV61aVWkv83fwqYlKxprK+ahuPqFChUq/
1lZkK32fc52KZnnXU1whq7w4hAoVqpLWqdJsL1+G3FmU7EqXytUw9Al9Qp+/r493
bcWV1r22JvNOpcfQJ/SR5uPNIqcIZ1HoE/psg483i7JVuM8LFWpb5M0ivCwQzqJQ
obZe3izCW0/CWRQq1NbLm0V41TqcRaFCbb3WRiuiVybeRnRX4rcHEh+R0Xf0H1QN
lb4DQd/KrO1oJ88D7zXRb0jU0m/knhOdoa6toz8NVFeZ7/tOUb73bNgVvkYjzgcl
9bfb7E9LcL5ByxffrvA1GnE+HIzdFoIbm/oGLV98u8LXaMT5cDB2WwhubOobtHzx
7QpfoxHnw8HYbSG4salv0PLFtyt8jUacDwdjt4Xgxqa+QcsX367wNRpxPhyM3RaC
G5v6Bi1ffLvC12jE+XAwdlsIbmzqG7R88e0KX6MR58PB2G0huLGpb9DyxbcrfI1G
nA8HY7eF4MamvkHLF9+u8DUacT4cjN0Wghub+m4vzVBv5umbUbjR5f7xOfrHAiB6
BNRmMak4Hw3Hd44yfiqC+DNFBpx+4IrGozYLRcX5aBS+c5RBg9s3KyEaj9osFBXn
o1H4zlEGDY67tbZoPGqzUFScj0bhO0cZNLh7m9staTxqs1BUnI9G4TtHGTS4u7yK
A8dL7ZA4cP3VaZLAYxrc7R+r+8Cn5x5C41GbhaLifFBSf7stDh5L31/d+/LmVbd0
a784QuuTyRffrvA1GnE+HIzdVj1yOTutoUdAbRaTivPRcHznKAMb/Abce+VWi8aj
NgtFxfloFL5zlEGDY7aLBEcuJxIcy6pIcMRDNDlXdgOOXE4kOHI5WeAxL5dDNKzu
h+x5zME0HrVZKCrOByX1t9vSncutfXbF/D1yHovQ+mTyxbcrfI1GnA8HY7dVj1zO
vlNDj4DaLCYV56Ph+M5RBjb4Dbg78F3ReNRmoag4H43Cd44yaHBAiwRHLicSHMsq
wOVc4Aw44okERy4nEhy5nCzwmJfLuSt72dqna+59udJLh18x9tRPIrQ+mXzx7Qpf
oxHnw8HYbdUjl7NffKJHQG0Wk4rz0XB85ygDG/wGHJFEgmO2iwQHtEhwLKsiwREP
4HKu7AYcuZxIcORyssBjXi7nblb/N3F8zc3lHpt9Xr9Imw8jtD6ZfPHtCl+jEefD
wdht1SOXcwc+RI+A2iwmFeej4fjOUQY2+A04IokEt7etEI1HbRaKivPRKHznKIMG
d9d4Oeu8AXehxYEjnkhw5HIiwZHLyQKPebkcoLG6PzRtWs3N5UrO+GnWrFmLIrQ+
mXzx7QpfoxHnw8HYbdUjl6NHYZk+m8Wk4nw0HN85ysAGvwFHJJHgmO0iwZHLiQTH
sioSHPFEgiOXQ0w5KY0BRy4nCzzm5XKIidX92n6/19xcbuefr15UesNXEVqfTL74
doWv0Yjz4WDsNrrQUN/tpS3ncu6nniB6BNRmMak4Hw3Hd44ysMFvwBFJJDhmu0hw
5HIiwbGsigRHPJHggBYJjlxOFnjMy+Xcd0lem3dnzc3lpmaUr2yVsTBC65PJF9+u
8DUacT4cjN1WPXI594PcED0CarOYVJyPhuM7RxnY4DfgiCQSHLNdJDhyOZHgWFZF
giOeSHBc1d2XGyEaj9osFBXno1H4zlEGDQ5oWeAxL5dzP/ix4qMZNTeXO/66vEdP
WfJxhNYnky++XeFrNOJ8OBi7rXrkcvpPImjRI6A2i0nF+Wg4vnOUgQ1+A45IIsEx
20WCI5cTCY5lVSQ44okERy4HcDkpjQFHOiMLPOblcu6fOvro4xdqbi73/Jhn2r14
4KcRWp9Mvvh2ha/RiPPhYOy26pHL2X8Qix4BtVlMKs5Hw/Gdowxs8BtwRBIJjtku
Ehy5nEhwLKsAl3OBM+CIJxIcuZxIcORyssBjXi4HcKzujR+aV3NzuQWRc9u93u6z
CK1PJl98u8LXaMT5cDB2W/XI5VDnih4BtVlMKs5Hw/Gdowxs8BtwRBIJjtkuEhy5
nEhwLKsiwREP4HKu7AYcuZxIcORyssBjXi4HcKzuM+p/VnNzubs3PPD6T42XRmh9
Mvni2xW+RiPOh4Ox26pHLleQ8PPTUZvFpOJ8NBzfOcrABr8BRySR4JjtIsGRy4kE
x7IKcDkXOAOOeCLBkcuJBEcuJws85uVyAMfqPvfUx2puLve/z3dq/PxR4fvlFJ/L
FSb8/HTUZjGpOB8Nx3eOMrDBb8ARSSQ4ZrtIcORyIsGxrIoERzyR4MjlAC4npTHg
yOVkgce8XA7gWN0HzP5Pzc3l7jmm7gULRoZ/j1XxuVxRws9PR20Wk4rz0XB85ygD
G/wGHJFEgmO2iwRHLicSHMsqwOVc4Aw44okERy4nEhy5nCzwmJfLARyr+wsP1uDv
Cr5pz8f3viP8ruBkuVxxws9PR20Wk4rz0XB85ygDG/wGHJFEgmO2iwRHLicSHMuq
SHDEEwmOXA7gclIaA45cThZ4zMvlAI7V/Y9ajSI0HrVZKCrOByX1t9vSncttvOzc
R3Zr9E2E1ieTL75d4Ws04nw4GLuteuRyJQk/Px21WUwqzkfD8Z2jDGzwG3BEEgmO
2S4SHLmcSHAsqyLBEU8kOHI5gMtJaQw4cjlZ4DEvlwM4VvdBt99fc+/LlT83eOaC
nuF9OcXncqUJPz8dtVlMKs5Hw/Gdowxs8BtwRBIJjtkuEhy5nEhwLKsiwREP4HKu
7AYcuZxIcORyssBjXi4HcKzuk5p0rbm53P4/799lUpN5EVqfTL74doWv0Yjz4WDs
tuqRy9VO+PnpqM1iUnE+Go7vHGVgg9+AI5JIcMx2keDI5USCY1kFuJwLnAFHPJHg
yOVEgiOXkwUe83I5gGN1P3HvwgiNR20WiorzQUn97bZ053L1/917xZCrv47Q+mTy
xbcrfI1GnA8HY7cFl8tdW0ep3Z3f6iqTy6Uo3xHZFb5GI86Hw7PbgjoVqcoX367w
NRpxPhyM3RaCG5v6Bi1ffLvC12jE+XAwdlsIbmzqG7R88e0KX6MR58PB2G0huLGp
b9DyxbcrfI1GnA8HY7eF4MamvkHLF9+u8DUacT4cjN0Wghub+gYtX3y7wtdoxPlw
MHZbCG5s6hu0fPHtCl+jEefDwdhtIbixqW/Q8sW3K3yNRpwPB2O3heDGpr5Byxff
rvA1GnE+HIzdFoIbm/puL+kXFnEzyn5h8YTKTnHRI6A2i0nF+Wg4vnOU8VMRxJ1Y
A64jeaLxqM1CUXE+GoXvHGXQ4Lj1bIvGozYLRcX5aBS+c5RBg+OFRVs0HrVZKCrO
R6PwnaMMGtx9lcUVjUdtFoqK89EofOcogwa3l1eIxqM2C0XF+WgUvnOUQYPjhUVI
zutrBhwvLEJywGMa3O0fq3vTwcMiNB61WSgqzgcl9bfb4uCx9L2wuPLOto80eXdd
hNYnky++XeFrNOJ8OBi7rXrkcnZaQ4+A2iwmFeej4fjOUQY2+A04IokEx2wXCY5c
TiQ4llWR4IiHaHKu7AYcuZxIcORyssBjXi6HaFjdd5jfJULjUZuFouJ8UFJ/uy3d
uVzjBxcs7veP1RFan0y++HaFr9GI8+Fg7LbqkcvZd2roEVCbxaTifDQc3znKwAa/
AXcHvisaj9osFBXno1H4zlEGDQ5okeDI5USCY1kFuJwLnAFHPJHgyOVEgiOXkwUe
83I5d2U/6sfTIjQetVkoKs4HJfW329Kdy9X9dMfe47/8LkLrk8kX367wNRpxPhyM
3VY9cjn7xSd6BNRmMak4Hw3Hd44ysMFvwBFJJDhmu0hwQIsEx7IqEhzxRIIjlwO4
nJTGgCOXkwUe83I5d7M6u/SoCI1HbRaKivNBSf3ttnTncoWlx71W74zwvpziczl3
4EP0CKjNYlJxPhqO7xxlYIPfgCOSSHB72wrReNRmoag4H43Cd44yaHB7jYdoPGqz
UFScj0bhO0cZNDig3R+IxqM2C0XF+WgUvnOUQYMjnkhw5HIiwZHLyQKPebkcoLG6
77vvOREaj9osFBXng5L6223pzuViPa6eNm1a+H45xedy9Cgs02ezmFScj4bjO0cZ
2OA34IgkEhyzXSQ4cjmR4FhWRYIjnkhw5HKIKSelMeDI5WSBx7xcDjGxuo/tPzRC
41GbhaLifFBSf7stDh5LXy53z+Q7Dj/vhjCXU3wu537qCaJHQG0Wk4rz0XB85ygD
G/wGHJFEgmO2iwRHLicSHMuqSHDEEwkOaJHgyOVkgce8XM59l+TggwdGaDxqs1BU
nA9K6m+3pTuXm3/uht2mP7w2QuuTyRffrvA1GnE+HIzdVj1yOfeD3BA9AmqzmFSc
j4bjO0cZ2OA34IgkEhyzXSQ4cjmR4FhWRYIjnkhwXNXdlxshGo/aLBQV56NR+M5R
Bg0OaFngMS+Xcz/4saJ/7wiNR20WiorzQUn97bZ053K9uq+Zfuk+4WcfFJ/L1Ur4
+emozWJScT4aju8cZWCD34AjkkhwzHaR4MjlRIJjWRUJjngiwZHLAVxOSmPAkc7I
Ao95uRzAsbo/X1KDP8f6xP5FOb/MDXM5xedyeQk/Px21WUwqzkfD8Z2jDGzwG3BE
EgmO2S4SHLmcSHAsqwCXc4Ez4IgnEhy5nEhw5HKywGNeLgdwrO5N96zBn2Ntd3/Z
Y00Ghp9jVXwuhzpX9AiozWJScT4aju8cZWCD34AjkkhwzHaR4MjlRIJjWRUJjngA
l3NlN+DI5USCI5eTBR7zcjmAY3U/8MIRERqP2iwUFeeDkvrbbenO5dru1uKQhyes
j9D6ZPLFtyt8jUacDwdjt1WPXK4g4eenozaLScX5aDi+c5SBDX4DjkgiwTHbRYIj
lxMJjmUV4HIucAYc8USCI5cTCY5cThZ4zMvlAI7VvevBB0RoPGqzUFScD0rqb7el
O5d7tuCDfR/dY2WE1ieTL75d4Ws04nw4GLuteuRyhQk/Px21WUwqzkfD8Z2jDGzw
G3BEEgmO2S4SHLmcSHAsqyLBEU8kOHI5gMtJaQw4cjlZ4DEvlwM4VvcjBw6K0HjU
ZqGoOB+U1N9uS3cuV/FE0QGPLgg/x6r4XK4o4eenozaLScX5aDi+c5SBDX4Djkgi
wTHbRYIjlxMJjmUV4HIucAYc8USCI5cTCY5cThZ4zMvlAI7V/aHHh0doPGqzUFSc
D0rqb7elO5cb+/PS50fsF77Gqvhcrjjh56ejNotJxfloOL5zlIENfgOOSCLBMdtF
giOXEwmOZVUkOOKJBEcuB3A5KY0BRy4nCzzm5XIAx+p+6Wv9IzQetVkoKs4HJfW3
29Kdy91/92dXHD0qvC+n+FyuJOHnp6M2i0nF+Wg4vnOUgQ1+A45IIsEx20WCI5cT
CY5lVSQ44okERy4HcDkpjQFHLicLPOblcgDH6r5jx2MiNB61WSgqzgcl9bfb0p3L
ndZ6zsSxO6yJ0Ppk8sW3K3yNRpwPB2O3VY9crjTh56ejNotJxfloOL5zlIENfgOO
SCLBMdtFgiOXEwmOZVUkOOIBXM6V3YAjlxMJjlxOFnjMy+UAHv/sw6QBERqP2iwU
FeeDkvrbbenO5S75blqTrpPC+3KKz+VqJ/z8dNRmMak4Hw3Hd44ysMFvwBFJJDhm
u0hw5HIiwbGsAlzOBc6AI55IcORyIsGRy8kCj3m5HMCxui8a2ztC41GbhaLifFBS
f7st3bncPwp/ualPK8HfFdyz1h/Ok9xn5OlD1znl2k7OMDtt3b++GlK3U9mbe0zv
Vdb0jJM397tM/U/lX9/hX2+Wfdiv/Lr8QxcPeG71neuGLS6cFGv85c+vnbkx59Kc
uTt/X5S9W3Rc27vePfCue+5ZNOSfZ7966F3rnvvfu5N/ffeArn16fHfuK+fdWPrD
x00fXFJw+Imxnx54c8ZBD155+7+afPnIO7s9smnDpt/fXF5w1fNZvw27re9L111+
0b5PXt91Q90DVv824qNBH1zYsF5h7z2Klw848MLxXx1yRLO+y0eX/vrxwTuNP/ae
Nb9eN3nNkgXHT9nQdsnqokXlY24d0GrvPq2++qhf+18XL3704z7r2w67cPLBO11z
2Nc3d93/8xHPvL1ozVfP/PrjGy/m/XR9vZf6zDrpq/77dLm/8b2nLJgztOvIyRO6
zHrjjL6v7rL5ys4Ll41v91uPHr+/samse476dcCLPT568PPuL//56vJZl3zx9uR3
ln+///wxtaNr7v+z7k45v/7y3Q5NNudPO/Gw+2ZkP9/o9vz+P499+o/Du+0+KDZ0
4+iD/n37Bx3aT2vxWq+f3p/2covYdQ26fX7fvRmnvtTyvV/3mLjy0q43HPbq5l47
lGycuXpZxq7td+k45z8PXbnDqMUjNqqSfxXvuuz0hXOzOg49cFTFtd13KGlbklX/
93tGjB+x7pA1mY7n/Uk9E90t6Djr2B/vv/3XC9699uOH13XodO2Kpce0vKPp7OsH
1Fs6cny3JSM33Dzr7Nl19rj85nafNS9s+PDBv85dfP5RDxW9/PmlZw+Z8WGrbtOv
Pnj9kCfX3z73rLMPPvGV54q+nLtq6i7/umO/N/decuVxZ7/dct3h//n6iSdb3D1l
SMfcVxa8dN7oz5sf+fOKvT9s9cVjl/yx+paxyx9uV/DMLuOvbfjwf5veNqr5Xe/d
c/B39e447aDfL63X9cQ9JsQOXzxx9i1/PHD1rNyuderPuOOuZvsu/3f3Iw5cufMz
uy6t/Xj7ooc6npp3wZlTTrxy8Lwbbvrmj24XT+3246hjm+1xYrNrr91twnHNHjun
9cCnf5rW8blu9Taf9sRO7x9/1+T80WM2dT381BEHrH70zci0az//5/odD8saPfXE
fovGnNPjrb5Tzn2xcZ+BwwbUidapwEJXV+XFr/H7n3XeIGdn09xZbg90sryJZvXH
DMT7TtI1E/9uwmnAOYLqqlbO/3vlnlzQpqigtG78HGWoA1Qb1dA5k2XO9gifpBvr
XE8GOL9nxJNnlT3FqdE3S9ANHnOj+VsMGaq5+4tq2nWSs93uFjWm16a8ldGtty8T
A5zobeKP0JoTdR+E/+yeyuJ/EAA1Ozk/9eL/Z6rexh3qY/0+VXVR+sqIH9sLcqO7
sh/JtU+Mnxn0pI9IqR0TNU2cn6bOT33VMfH4jeZS1TBa2W5n2bXif52sTwZ6G5O5
Vq0zPdx5ZMc9T3tklnmE+0il7r4L+j5hF6qZ8TF/cryHiswNamOlY3DVO5rc1j1c
HSf6Xv2gNqlpqrPSSXRVquv8zLxv5LI/x/jPF9q9ngqt57cqbbmnLYk+kgo+0yvw
rNlH86jaR+nU0fWpSo+ocqWf+S0ptX7tb42sul94T49WZkCZWiybuupYqfdrf01U
1f3CmzLAP7VYds9Vx0q9X/vD8lX3C2+bweVILZatqmNBqfX718aS+5NarOo5lvCT
+nNePceS65taLFtVx4JS6/evjSX4pv6cV8+xBN/Un/PqNJaaVlyjkFHoOi/zqD90
br2hc6+J2zr30NT6/LdSg3SV8h7jlZmJuGXOvy0L0V1dFCfcVyG7aJyoRX9EEbf1
9ziFPSb2iI+vhk6e2jt+rrR9PrHfJvYuGZXtC4g9j9i7Zla2RxD7HWLvllXZnuHY
fSw7O7uy3ZvYTxI7J6ey3YfYM4mdm1vZPoXYTyXsq60zzyhx5q8xz/G1phxnyulq
b6WzrxbG0yc9mlp10g4/xIcSbkdCGEQ4DHvY+P/ii/7fL9fT3x7thP+rnhRQal6p
TUlbW/+IpmZ6riX1XlJeoTA99YbEm55trOnZJJr41cidnvoO3Ja1TdMz0eqfnlUM
r0RrCsMLJ5FTOLxSfYQ7vNaR+nB4hcPLp61/hDu8KhIH496UePC5gdMn5PWIoE7f
VPAnF9p3XtzHFm41pSr/8IKqGCTb/xLnnogNlgdU+V7LzOytm2fuiUjldGzTidj+
s8U9ERvjliexJ+L7uOWpd7RXXM8mmRpbPhHeylu1tulEbM3UoCfAFX8ifohbnv7a
iEj7iUjfiNgUtzwJPBEN4ttq3DAGJtQ4vo3ERsVR/A9raKCbO+0ev7FvWozs9kbe
W5Stj1+VV+yq4Nci58P8FsUrSnvm/JSfXzy3VL/YUVqKFeoqA7BU3a30XxfGsaIG
JfqnP3RVS4/cs+bamrC0Un2ZGqUaJB7hF38tdzk4lUf1OctTu+f2LXoor2XpEblX
Fo3NKyhtmXt20d15u5dmOdftrT9neIkp/bLPDdS84maFl2IynE15hnPMGc4FO37k
ziEtT3h5L8u4L7LMP+3+F97PWh4pzM7RL3exekVNds5TvtPjAaqhGuDU9MyKT4HE
HyWv5bT7z/SeiUk3WbV2mvEMJiZfZkUlCh19Sy9yJNy8QLD0E+QXusKUg8ztnvgj
8Rg3MBJUTC5w2GmtK9cfsl/vMcIRuSfX/X2zc7LipeEy9XOiKp70RlHOwUTWpU6E
9e+69I4xUzWPtoqfwo5ZKrN1/LcD1OkZ2zIV7FNN5U2FWXnTCvYvalm6OG9eQVlR
QemcvKcK9in6O06Fps4R9PFNhZ6/u17eVGjQ5OfBdQ770NgbnalgXvmNa+rUByuV
O72UFZ8KWdthKuC9yXGxU8Hfh6eEW+WpkGwGwyvdU8E5QYmpYH7f7JysxFRw6/7q
VHgv92MzFd7JmpWZrqlQy7mSrizRV9KCUn0lLSjVV9K/z1TQuYT3bOJIYP0fe9cB
H0XRxeeSyyW5SzkwIE0IPbSEhCqCd0FERHqVKi1IM3QEVDgB6SCC0gREQBQEBBUB
AcGCiMKHCkhTivTeEaR9+3Z2bidv53KXwJ2B3f+P493MvJ23/zfzZmb3NrO01ziT
S8o8hgbR1QhrXbVfOZ2Z8S/jLALzbxC5GDbH/op1YraY8O/sz1u7ZSsdvs+eaG2U
TfKVifrXHJcB/5rM6vMWfgP2L+2HAOpBHswD/GqGlcWQBJnhVkL79Ebp01vmWV7R
KOXKTujDESa4FwMKMkrLd2ZebNK1X4+UMiSWgB16DvThlXByKB68C9at5KgZrujp
mZmlwcpCukvfXpE+qdKnVKZaF46k9WuhRk9VaR3a2JJgbyetQxOkyIF1KMigRy56
XP9J9EwzH7SOChljX2sOtnUMSbHvMOe1vRBSF0YnJXpIuwz410TaTZNOZIx0PMiD
0kQwKkSVkL9Wyk9RZLB0GdMxRJWQv0PKB/sg80r5L4SoEvK1/qXRMyI4s9GT7x6N
njipTBQ98GCQiTwhNRE7sjSkSM0e/Xv2SenbMSW1Y0ps19R+Kal9u/YbFBuXHN80
vkTmg+qkn4MqiJwJy2PtY81niw5/2lrPesNaPLyZtaL1kDXzjS4b8CvEjQ7IXKMP
Uxp9oodGH0ag0UPSNDpcCVSO7dKrM27cKAKNu7xiVmjcblH7IlpGT4iaGHU3omJ0
16iFUTkj80c3lE4xKTjj82FSsDmuZTQh+6T+C3KCVE+3KFVCfkUp/64iu0p5E6NU
Cfn5pfyckVTCeSyMUiXke2rc8dbMNu48ZT78mojnQ3hQD5bz/HwI69kWicqEWIyA
IXoRqY1di3xqnhvZ39NiFLFYTkTXk6ZFWEzCJ7vlSnR1S2HJI0FBGZ8Wg+gBfgZu
ZNpEgNmkMqEX9M0JfQ40PbgvkAitc3YstI9CIRmOzozf08Oj7Xe4egS/F2UKHpC+
3+HoB+/3XE6XCyyMNr0pL4hKwmUvVAHrp2Ek1qKlx8NTPg9QYXpwce5yucjOnTtJ
u3bt5DTIkydPprmAfxh0HkV44uqLP7KajgEDBvyPsy4zodPUOeIMVtePsCL0OjkY
MGAgDc4Ru1ldwgJYFHma6XyZDQ0dQ8fQeXh11LkVZlo2t3rS9qVGQ8fQ0ZuOGkWS
MKLI0DF0MqGjRpGZGNd5BgxkBmoUwc9gRhQZMJBxqFEEz1sZUWTAQMahRhE8pWFE
kQEDGcdZp8s53P3wxwz3t/nuvwujd/QXkHyE3oHAz+/TtDNZ1YCHQvinWOhDIhud
y8gGK32UB/5STd403UdontngMzSFCkQ6ILE+X8b/iZBIN9DQ2OczNIUKRDoiMnyZ
QVxJY91AQ2Ofz9AUKhDpiMjwZQZxJY11Aw2NfT5DU6hApCMiw5cZxJU01g00NPb5
DE2hApGOiAxfZhBX0lg30NDY5zM0hQpEOiIyfJlBXElj3QeFZWRbGF3EwsKXvfkH
74EMwGeA00KaGCIdSk5cOUjZFYF4VYJCnD3zw4Dt4bSQFIZIh1IRVw4y0MTxo/rY
Hk4LSWGIdCgVceUgA00crvJ4YHs4LSSFIdKhVMSVgww0cXZ5zIDt4bSQFIZIh1IR
Vw4y0MT54RWA7eG0kBSGSIdSEVcOMtDE4RY9gLU8tofTQlIYIh1KRVw5yIARv0GJ
s/phkPsjZOHT2B5OC0lhiHRAYn2+TCbuxxfg9H61+Fdfb9zpwPmeoLHPZ2gKFYh0
RGT4sqyxpOFnd3wGOC2kiSHSoeTElYMMWOfnljS6JA7RrkvisKTRJXEYVnVJHOzp
kjgsafRFnFvSgDUY5CpOuvLoLmnGvTtxraXPAQfO9wSNfT5DU6hApCMiw5dljSUN
f92OzwCnhTQxRDqUnLhykAHr/NySRpfEgbQuicOSRpfEYVjVJXGwB8T1c7OCW9Lo
izi3pGEDXN070x/dJc2OJZ2WLSqww4HzPUFjn8/QFCoQ6YjI8GVZY0nD35HHZ4DT
QpoYIh1KTlw5yIB1fm5Jo0viEO26JA6kdUkchlVdEgd7uiQOSxp9EeeWNOzS5d/z
vz26S5qEa19WP1htnwPne4LGPp+hKVQg0hGR4cuyxpKG/60dnwFOC2liiHQoOXHl
IAPW+bkljS6J81dvAGwPp4WkMEQ6lIq4cpCBJg5DnS6JA2n2AWB7OC0khSHSoVTE
lYMMNHGwp0visKTRF3FuSQOkYZDb9NuhR3dJM/bF0u9WzvOnA+d7gsY+n6EpVCDS
EZHhy7LGkgafBZfUpIU0MUQ6lJy4cpAB6/zckkaXxCHadUkcljS6JA7DKpvdAdge
TgtJYYh0KBVx5SADTRzs6ZI4LGn0RZxb0oBNGOSKTzz46C5pqo8tuueHS/sdON8T
NPb5DE2hApGOiAxfhkdYrPugkP6Shj0fD8BngNNCmhgiHUpOXDnIgHV+bkmjS+IQ
7ewqDoDt4bSQFIZIh1IRVw4y0MRhSaNL4kBYl8TBni6JA2l9EeeWNOxBogt5bz+6
S5pTR+cdemP4QQfO9wSNfT5DU6hApCMiw5dljSUNe4sxAJ8BTgtpYoh0KDlx5SAD
1vm5JY0uiUO065I4LGmAuH7GeW5Jo0viYE+XxGFW1xdxbkkDxGGQ+6dZpAPbw2kh
KQyRDkisz5f5e0mz/4e7Fw4sPuzA+Z6gsc9naAoViHREZPiyrLGkwe/p5JKatJAm
hkiHkhNXDjJgnZ9b0uiSOEQ7ENfPcMctaXRJHAjrkjjY0yVxWNLoizi3pAHiMMhl
W7Pk0b1LMyK0bbZC03Y5cL4naOzzGZpCBSIdERm+LGssafh9qPEZ4LSQJoZIh5IT
Vw4yYJ2fW9LokjhEuy6Jw5IGiOtnnOeWNLokDvZ0SRyWNPoizi1pgDgMcr9Mv/jo
LmmGZV/+cu7HdL0vDbwCoygxXoHhMzT2+QxNoQKRjogMX2YQV9JYN9DQ2OczNIUK
RDoiMnyZQVxJY91AQ2Ofz9AUKhDpiMjwZQZxJY11Aw2NfT5DU6hApCMiw5cZxJU0
1g00NPb5DE2hApGOiAxfZhBX0lj3QYHel4NFLH9frmVaJRn4DHBaSBNDpEPJiSsH
GbArOIU4taQC28NpISkMkQ6lIq4cZKCJwyUrD2wPp4WkMEQ6lIq4cpCBJs5vzQLA
9nBaSApDpEOpiCsHGWji7O4MA7aH00JSGCIdSkVcOchAE+eHVwC2h9NCUhgiHUpF
XDnIQBNnf+miq/tyQJzVD4Nc0bGFHNgeTgtJYYh0QGJ9vkwm7sf7cpYxb8ys0fCo
A+d7gsY+n6EpVCDSEZHhy7LGkoaf3fEZ4LSQJoZIh5ITVw4yYJ2fW9LokjhEuy6J
w5JGl8RhWNUlcbCnS+KwpNEXcW5JA9ZgkJsypYED28NpISkMkQ5IrM+X+XtJM++V
M236ZD/twPmeoLHPZ2gKFYh0RGT4sqyxpOGv2/EZ4LSQJoZIh5ITVw4yYJ2fW9Lo
kjiQ1iVxto8sA7aH00JSGCIdSkVcOchAE4dhVZfEwR4Q18/NCm5Joy/i3JKGDXBh
Lw9wYHs4LSSFIdIBifX5Mn8vaX56/qNbh7aed+B8T9DY5zM0hQpEOiIyfFnWWNLo
a7N0bkmjS+IQ7bokDqR1SRyGVV0SB3u6JA5LGn0R55Y07NKl6HfPO7A9nBaSwhDp
gMT6fJm/lzRDXgr7tEblUw6c7wka+3yGplCBSEdEhi/LGksa/rd2fAY4LaSJIdKh
5MSVgwxY5+eWNLokzl+9AbA9nBaSwhDpUCriykEGmjgMdbokDqR1SRzs8eSxPZwW
ksIQ6VAq4spBBpo421hRP8S5JQ27KWlu08WB7eG0kBSGSAck1ufL/L2kaTdp/Mi5
tnMOnO8JGvt8hqZQgUhHRIYvyxpLGnwWXFKTFtLEEOlQcuLKQQas83NLGl0Sh2jX
JXFY0uiSOAyruiQO9uCjn5mdW9Loizi3pAGbMMiFOjs7sD2cFpLCEOmAxPp8mUzc
j0uaEnmb7iQ/nXXgfE/Q2OczNIUKRDoiMnwZHmiw7oNC+ksa9nw8AJ8BTgtpYoh0
KDlx5SAD1vm5JY0uiUO062t7fG5Jo0viQFiXxMGeLokDaX0R55Y07EGiYqMf4R+e
Ro65/ZU50fjhiYiXNLp7IQJb0uiSuHwBw2VjezgtJIUh0qFUxJWDDDRxWNLo670A
3JJGl8TBni6Jw6yuL+Lckoa9AuOpG4Md2B5OC0lhiHRAYn2+zN9Lms1VI1qHvnTB
gfM9QWOfz9AUKhDpiMjwZVljSQN7hjPgM8BpIU0MkQ4lJ64cZMA6P7ek0SVx+Y8B
uGxsD6eFpDBEOpSKuHKQgSYOSxpdEodhVV8vROCWNLokDksafRHnljRAHAa5PFub
O7A9nBaSwhDpgMT6fJm/lzS9+h0tP/ym8UfcRLyk0d0LEdiSRpfEIdp1SRyWNPp6
LwC3pNElcbCnS+KwpNEXcW5JA8RhkOtXpqQD28NpISkMkQ5IrM+X+XtJE3Fk65vL
nj3mwPmeoLHPZ2gKFYh0RGT4skAtaRqFRUoDessB7XvckRp7elmpm7U9N3N7zx1l
Yza3sdZy2XcMudhxo2PjmMdqZZvW76PHfi9ZsmJ45aZdJ/dfWPBUPlvLu0HnWz95
duPQNyv3fu52yKzVlwvEjm1T/Nv+Z78sNa/0mfe/fHLQpRPVNnx27seVu18/Zj5h
r97zQqEmF25+/8vZfxt235//0OpXHvs74syS6lPuzHk5+sAKx4DxB5vsXVlmb/T2
4+f+XNQqW73mjT9eO2T35/m2z99zbtPnJ16a1Sl/ybGjetYauKddSvdPf+uy/7WI
lUveyGdOjalRpP93yX+MvVR/R3S1qDaVks/dXV+oXuQfRfeUC2mVGHLmqXf/LVK+
d6E9T0cN6lq86D9fjOy09BPH3GKPzw9/PPapn5aNqjf/7NjbrXcWqHWvYL8C4Q1P
RPZPavMmufltvxxFh/d5v/Kd4F9OX/36wyFxb9ec3+P2FUuRmOsDep08cfC16EkN
rkckXInMu906v023Q1Wic9S4WmJh6NKwUU2uTLyz5p23N507mGC9VXTTN2237F/z
zbrIKn9N+25Z1QJnRo2o9/jArn//nDpqXcGe5kF513y+v2DPn/ImH6i57Oz1lO2t
pjmWvPbyqjNXn3mh/JDJJyZVOrr0WBrdC8e2tipxs+2lHM16/tP+Tu8Tb134/XbF
S7ubFnz769vrv5+6Kd+GCZPbnGtZo+oHZ39vf6hVs5dfn/9X9udOWZ4a3nNBr+DQ
5GF5ts89uv5qqzzLT3ap1blntz0Db3z+2Knvu+3/ZdWFx8q3m7Zp7sK+fywe16y+
5USDhI6PL8sfvLdSuatnn3T82qXS7CEtp5y58WTut1rUXDc5ZVe+RuMs1XcsOvDF
jnzf5hz3QYFnh/WZP6lo9ZdrF38qLMcn9Wt1Gj8t+Ujh2Y5f69x5/ZXJJU53yN34
h5j1pX74c+aPJTvkHD++/sk7P1x1dZ331eMLt2x4v9hzzxU4PqNY0lfTu35+c0WV
/jNL321TevhHM4sVr75+Q4stPyVPa1wtd9Vlg8teb3d2Rsvg028OtjSYf2DaW58W
H7656YUNQ84n9nrrr6pj2l5on+fGU5X/V6ZBaK1P1syw1Cq1uc4Lm8+tXJnt6KUF
hW86bp7asuSVkE9LnjzceO/3P9/pefNG3/iWKamdsjuzu2Dgi5HGfgjDJ7v06kys
JE4afqtIsfKOMhtAREYpkgso3QLcAD4CPEakgYSUtLSyJUXa7DGyj0ykPEkiuYmN
5JSuGiKk8rHS/NJJ+m6if1ZsnkOGScJO6FUFHDNBuXdmInHsCyloa/FT9Zy1nUpS
LSPqSMny+Wmjk2Q9ST6CYqOTHQT/8TXFyPcxICev9MlJ8hCYCdso6oC23Pe5pBah
MyV8eC0As87AHykqf0f2DNREz4iQHO6cYtKnuPR5nFR1H39RmbpyOdOmK3LpMPnX
5LYmqG140E3yr1LDwEa1b5VqvEo5gh1JyMwZgEvudARZLvf5l+QaRgTdJnfSnAND
C6fnNK1hgszoLrjc9BGpQdI+nO4JMdJn+YcDDt0dqvUXlKs1RXDt6w3p15Qe8JEY
oLPUBa3Gn80iUprQpSTT8YZPSCyhLZ8efKvXyn33Xi9oL3Wm5QDSN1s8a++2fK8X
XtLF4L1e0MYcQN83W3zN3m35Xi+cDYP3ekGb58B4+GaLh3dbAN/qvb++xD6+2cqa
fQk+vrd51uxLTNc3Wzy82wL4Vu/99SXQ9b3Ns2ZfAl3f2zwr9aWirpEEVhQ0T115
fPH9zmPXQ8fIabr2oKyp/8uSzjSLqMeoMshtN0ZaeaUPsM7wqsywjPS5RAq5c6E+
BAcrvS2z4PtEcbl/5ZHWqW1kX9F0F5T+CqXNprTpxij9IUpfQOlqQWnT41F6H0rH
BadNL5bSbbn0DZSuaU6bfhelj6B0Ykja9FCU3obS+Sxp091QerU7/RbXMgK4W2ak
0gdGKXK0IpeSUoSuzuIVTQ1obyubTBUuy12N/V0MdDI4DVhOMmjv4NP/tWCa2nJn
MvzvPWgAvmn5FrI8Mn5EUSV88VtP1UW7i0D40l+31PBN4sK3iNP9VQELX3rHLn1k
Knzdpdrw9dK93KU+dC9woghG9/L1CNa9/kX5RvcyupcGGT+Cda8R7pNhNy0WrEpZ
OjG8ngPy6E0H7eKD6m6RdXjArShfoe1eAC+d5MFPccwRtzkNQNp7McvNGYsz5ghf
3JEpRzz4aGGOuCOnVOjWEXfllIoWzqYyVnoIjfQdoY683pEpR2QkNLADGMSOwAPK
/fUIvzvCfz0Cn7MOHZFLvuyGORRoAgrJKbhQkXAPJCU0KbmwfONfKVHAlxeUf6qQ
Ec2+EBLryk9ALz7kN2t81DF7o5BrVmvUt3b6Y4hdOuQiGaEQ2E9mEvrQJJwr5ICE
+vHnoqzvbzCvsTRlaE+TH0MGklzuI7QQz+WMhwixTuqzcBJrqRO5ODzBXsPSK3Jk
uM1e2vJi5JzwwvZgad7OuM/gJyj/g/cNIM41icBPNSbpIt0knbNJmrDlM5dO6bhb
S/3Zhv0I8/roWgOfeu+II8IckmaX3bRYSCZJfrJKNZYnuUknKadlsBwC7ofMw6Ry
radLuINuFkmUiqEFi7DCIFcaFtR6ej+CuNVUQ2x/XBGgKrZstSgSjoRjmGFYoEJw
AQ9+WcvA9AH870EK4IyYc9n3e5KzZKnwUvI3Oom86HWC3AiBrOYBII9K9RyDSJyz
rOzC6sGVTInyt/KkmikzocC7GkMNheXhH9mqRCbYd4ZvseWMtNnXha+wxUc+jKFQ
XDqDtppQaOZesKqhsGTl7zPO3N6lpC9KoaD8Mixj7twFaeQTO8xyKAQ/gFAoygqF
oaCtQ4VbLW0oeIpg0PJ3KEgOcoeC8v2e5Cx3KLC8+w2F3y2fB9NQ+CH4zyB/hUKY
NJOeiKYzqc1OZ1Kbnc6kD08o0LWE2ppwJpCivcaZXFLmMTyIrkZY66r9yunMjH8Z
ZxGYf4PIxbA59lesE7PFhH9nf97aLVvp8H32RGujbJKvTNS/5rgM+NdkVp/H8Buw
f2k/BFAP8mAe4FczrCyGJMgMtxLapzdKn94yz/KKRilXdkIfnjBBxIKCjNJy/L7Y
pGu/HillSCwBO/Qc6MMt4eRQPHgXrFvJUTNc0dMzM0uDlYV0l769In1SpU+pTLUu
HEnr10KNnqrSOrSxJcHeTlqHJkiRA+tQkEGPXPSM+E+i523zUevQkIn2L8xhtlYh
3ey/mGNtz4Q0krpaohI9pJ3v/pUmpHZTpRPpG0UIyOtSVxoZokrI/1rKr6/IPJGE
dAhRJeT/LuVXUmSSlF87RJWQr/UvjZ4RwZmNnnz3aPTESWWi6IEHh0zkCUJc7MjS
kCI1e/Tv2Selb8eU1I4psV1T+6Wk9u3ab1BsXHJ80/gSmQ+qk34OqiDyb1geawdr
Plv+8KetT1tvWCuGN7MWsx6yqkMmydCQyT3C5jeIGx2QuUYfpjT6RA+NPpZAo5vT
DJmgD49T4raFXimteStmhbbtFrUvomX0hKiJUXcjKkZ3jVoYlTMyf3RD6RSTgjM+
HSYFm+NaRhOyT+q+ICdI9XSLUiXkV5Ty7yqyq5Q3MUqVkJ9fys8ZSSWcx8IoVUK+
p7Ydb81s285TpsOviXg6hOf4YDXPty3cammRqMyHxQgYoteQ2tC1yKfmuZH9PStG
EYvlRHQ9aVaEtSR8sluuRFe3FJY8EhSU8VkxiB7gZ+BGpk0EmE0qE3o934rQx0TT
g/v6iNA6Z8dC+ygUkuHozPg9PTzafoeLR/A7PJqbHtL3Oxz94P2ey+lygYXRpjfl
9VBJuOqFKmD5NIzEWrT0eHjK5wEqTA+uzV0uF9m5cydp166dnAZ58uTJNNfvD4PO
owhPXH3xR1bTMWDAgP9x1mUmdJo6R5zB6voRVoReJwcDBgykwTliN6tLWACLIk8z
nS+zoaFj6Bg6D6+OOrfCTMvmVk/avtRo6Bg6etNRo0gSRhQZOoZOJnTUKDIT4zrP
gIHMQI0i+BnMiCIDBjIONYrgcSsjigwYyDjUKIKnNIwoMmAg4zjrdDmHux/+mOH+
Nt/9Z2H0jv4Cko/QOxD48X2adiarGvBQCP8UC31IZKNzGVlto4/ywEMieJOG9KB5
ZoPP0BQqEOmAxPp8Gf8XQiLdQENjn8/QFCoQ6YjI8GUGcSWNdQMNjX0+Q1OoQKQj
IsOXGcSVNNYNNDT2+QxNoQKRjogMX2YQV9JYN9DQ2OczNIUKRDoiMnyZQVxJY91A
Q2Ofz9AUKhDpiMjwZQZxJY11Aw2NfT5DU6hApCMiw5cFivgysjOUrt5hPc9eFIT3
hgbgM8BpIU0MkQ4lJ64cpOyKQLxSQiHOHnZiwPZwWkgKQ6RDqYgrBxlo4vhvFLA9
nBaSwhDpUCriykEGmjhc3vLA9nBaSApDpEOpiCsHGWji7L4AA7aH00JSGCIdSkVc
OchAE+eHVwC2h9NCUhgiHUpFXDnIgBG/QYmz+iHW7x1792lsD6eFpDBEOiCxPl8m
E/fj+3KW3y2zY8Os3x043xM09vkMTaECkY6IDF+WNWZ2fpLDZ4DTQpoYIh1KTlw5
yIB1fm5m1yVxiHZdEoeZXZfEYVjVJXGwB9bY0gbbw2khKQyRDqUirhxkwIhzMztY
g1hf9NInj+7Mfv6LbIWu2djmW96hsc9naAoViHREZPiyrDGz81dx+AxwWkgTQ6RD
yYkrBxmwzs/N7LokDqR1SRxmdl0Sh2EViOtnguNmdn0R52Z2Fufjc997dGf2QlXb
9Uk8ctCB8z1BY5/P0BQqEOmIyPBlWWNm529T4jPAaSFNDJEOJSeuHGTAOj83s+uS
OES7LokDaV0Sh2EViOtnguNmdn0R52Z2tpA9VHfLozuzf17kmZB1JfY6cL4naOzz
GZpCBSIdERm+LGvM7PzvcPgMcFpIE0OkQ8mJKwcZsM7Pzey6JM5fxACwPZwWksIQ
6VAq4spBBpo4G+P1M85zM7suiYM9fRHnZnYgDbFeIVutR3dmXzGj6vRiQdo31HmC
xj6foSlUINIRkeHLssbMjs+CS2rSQpoYIh1KTlw5yIB1fm5m1yVxiHZdEoeZXZfE
YVjVJXGwpy/i3MwONiHW355w/NGd2WvWHXp2xW9/OnC+J2js8xmaQgUiHREZvgx3
O6z7oJD+zA67PDDgM8BpIU0MkQ4lJ64cZMA6Pzez65I4RLsuicPMDsT1cwXHzey6
JA729EWcm9mBOMT6qa12B7aH00JSGCIdkFifL/P3zN7gibqFZ+f+24HzPUFjn8/Q
FCoQ6YjI8GVZY2anr2KmwGeA00KaGCIdSk5cOciAdX5uZtclcYh2IK6f4Y6b2XVJ
HAjrkjjY0xdxbmYH4hDrC1vufHSv2S//u+qbJuP2OXC+J2js8xmaQgUiHREZvixr
zOz4xWZcUpMW0sQQ6VBy4spBBqzzczO7LolDtOuSONuuTT/jPDez65I42NMXcW5m
B+IQ6wWevvbozuy/7O3+5/cfH3DgfE/Q2OczNIUKRDoiMnxZ1pjZ+f0r8RngtJAm
hkiHkhNXDjJgnZ+b2XVJHKJdl8RhZgfi+hnnuZldl8TBnr6IczM7EIdY3/zc7Ed3
Zi/4wXe7b3yyw4HzPUFjn8/QFCoQ6YjI8GVZY2aHHasZ8BngtJAmhkiHkhNXDjJg
nZ+b2XVJHKJdl8RhZgfi+hnnuZldl8TBnr6IczM7EIdYd74y+dGd2ScnXrv2cV1d
70EH74YoTox3Q/gMjX0+Q1OoQKQjIsOXGcSVNNYNNDT2+QxNoQKRjogMX2YQV9JY
N9DQ2OczNIUKRDoiMnyZQVxJY91AQ2Ofz9AUKhDpiMjwZQZxJY11Aw2NfT5DU6hA
pCMiw5cZxJU01g00NPb5DE2hApGOiAxfFiji9L4crN75+3Jt0yrJwGeA00KaGCId
Sk5cOciAXboqxKklFdgeTgtJYYh0KBVx5SADTRyu1XlgezgtJIUh0qFUxJWDDDRx
ficqALaH00JSGCIdSkVcOchAE2e3pRiwPZwWksIQ6VAq4spBBpo4P7wCsD2cFpLC
EOlQKuLKQQaM+A1KnNUPsb77ZikHtofTQlIYIh2QWJ8vk4n78b5c96X9jlcZesyB
8z1BY5/P0BQqEOmIyPBlWWNm5yc5fAY4LaSJIdKh5MSVgwxY5+dmdl0Sh2jXJXGY
2XVJHIZVXRIHe2BNV7+4sZkdrEGsF/2mvgPbw2khKQyRDkisz5f5e2avnn/8+z/8
c8qB8z1BY5/P0BQqEOmIyPBlWWNm56/i8BngtJAmhkiHkhNXDjJgnZ+b2XVJHEjr
kjjbUpcB28NpISkMkQ6lIq4cZKCJw7AKxPUzwXEzu76IczM7i/PlG/o5sD2cFpLC
EOmAxPp8mb9n9njbB5HXp5134HxP0NjnMzSFCkQ6IjJ8WdaY2XW3YT6b2XVJHKJd
l8SBtC6Jw7DKts8GYHs4LSSFIdKhVMSVgww0cbCnL+LczM4Wsp/X6OrA9nBaSApD
pAMS6/Nl/p7Zq7YidafGnXPgfE/Q2OczNIUKRDoiMnxZ1pjZ+d/h8BngtJAmhkiH
khNXDjJgnZ+b2XVJnL+IAWB7OC0khSHSoVTElYMMNHF+jAdgezgtJIUh0qFUxJWD
DDRxIM0+AGwPp4WkMEQ6lIq4cpCBJg729EWcm9mBNMT6sLLtHNgeTgtJYYh0QGJ9
vszfM/uz608/a7ecdeB8T9DY5zM0hQpEOiIyfFnWmNnxWXBJTVpIE0OkQ8mJKwcZ
sM7Pzey6JA7RrkviMLPrkjgMq7okDvbY7A7A9nBaSApDpEOpiCsHGTDi3MwONiHW
V05v6MD2cFpICkOkAxLr82X+ntlfvTF3Qc5ypx043xM09vkMTaECkY6IDF+G4w3r
PiikP7Pr7k0BbGbXJXGIdl0Sh5ldX28K4GZ2XRIHe/oizs3s7N0Qi6skO7A9nBaS
whDpgMT6fJm/Z/Z95ydUa1r8pAPne4LGPp+hKVQg0hGR4cuyxswe6tbTssNpIU0M
kQ4lJ64cZMA6Pzez65I4RDsQ189wx83suiQOhHVJHOzpizg3swNxiPWXK7ZwYHs4
LSSFIdIBifX5Mn/P7GGlTv6+tdgZB873BI19PkNTqECkIyLDl2WNmV13bwpgM7su
iUO065I4zOz6elMAN7PrkjjY0xdxbmYH4hDrH4f0cGB7OC0khSHSAYn1+TJ/z+yb
I7/++0uX8QQdEc/suntTAJvZdUkcol2XxGFm19ebAriZXZfEwZ6+iHMzO3s3RLaX
+zuwPZwWksIQ6YDE+nyZv2f25bv2Fvx7ifFXb0Q8s+vuTQFsZtclcYh2XRKHmV1f
bwrgZnZdEgd7+iLOzezs3RBDqrR1YHs4LSSFIdIBifX5Mn/P7EVL3VxVf7OO78Y3
CntCGtdaDmjfI1KSn5SVulnbczO399xRNmZzm4r2YQUXRv64/U7w6ODikwrFn6pd
fEHTJv2y91r8e5Ezdb5YUDnnl7dz1Gpd+bzrxnOrC434YfYGcjdkbJvi39ads2Op
s0uV+vtmrbtxZc7B3QOO7Ou+7st1O8I+fPVV++Jrfx4OGXBn+ZpXonrtqRi+YmSF
Zh9+O2T78tCeewuU++GzaXtWltj7UumXz/25qE22ers7fFxmVfdcU4806PFP9b1X
6tdLin7v3VE9aw1cvfXn483WH6j4au5uuV7bc+XsRlutsyOGL8lx5IORZ57K9/Xi
YfvurB3UusqL09o9l6NH0xxLejY8nf2lTWPavbbnxEe53/tze5XJK+eddy1uPb5Y
6y57V54t++Xozz8+emLeXefFUb9WK1JjdoWdr3/9e1Cn0B2WsZZjFVf8e2vkb6f6
vzEw7u2a8zvdvmKpETNgwPILnQ++9s87Da7HJHwRmXe79aM23Q4Vzf+z7eRjdf55
33S9xMWJbfb+9OPf1y+cGPFG0ZQNbbbsW/PNushJ54vvmzP4f9dujRgx5OVBi/7+
ucPum9+2bnG2imN6qXFtToT2TVlx5na7ZaUHzC6w9b1Nc+LnDx5859a0s65ltieH
zDtRZUOJu8e3LbsyfM3ne/oPKds859r/RR9nVYydfOGJlzpdaxnd7e0q29u833nV
hA1LwnP/b/7zuVNXHEvcXKnhl7+0iRx9ZHLOJwYva9/vx0qHcj45ttKfuV8vM/LM
niuFmgwqVvTC0oPmjevmF5qx3rT88MW5j21s/+31y+duh13bk/J0WL///dvot9Nb
DkWcLtrj8OnESW8880z9Dy4FTxzw/enNFdZMLDC/4fROP5TKXXNXoV3tYsvPPl3t
yb+y9fjmxt6GReKeutii0NVap4qEzg/qHx7+7qXsXV7/4UreKo0cL83odPnrF39s
1GHsgRwdUut2bNzh+Pjx0Se3/XD11x1F/mpbre7dv8o/WfV1xy/l31nRYeGW47uP
Ldqx4MarKyKmdpu59a3BQz+f/M7wOXWudbq4+vSpFR9vnrO4QstqS+cEmXfear16
cNLA1tfunjmRP7j53m1HDu2KXzhn7fDvtwb1d42YufsI6X1sUteue9dXzJWcv759
y71T0cWmfHVsyeJ+0Qmdoj8+P9Q0bGL/Di1TUjtld2Z3wUCYQ7rKg4ePEst26dVZ
mhfipPG4ihQ07yjTA4RolCK5CNMtwA3gI8BjRBpZSElLK1tSpM2eQ/aRibQmSaSM
5NMIaTUNr6aZJE04naTvJrq7gHkOGSYJO6GrbThmgvJrkYnEsS/kqRWPSf+aO5Wk
WkbUoZPl8/NIJ8l6knwExUYnOwj+42uKkS97ICef9MlJ8hCYGtsr6oAO3Pe5pBah
Uyd8eC0As87AHykqf0f2DNREzwj6IcuBsyshfR4nVd3HX1TmsnzOtOk4Lh0mP0bU
wQS1jQoym0JMtIYF54Z0Lr72W+UIdiQh27YC1HQEWS73+Y5yDaODQk1hSg1p0cLp
OU1rmCIzCjdZTTbTR6QGSfunGp6QQ/os/3DAobtDtf6CcrUm6Fm+Iv2a0gM+EgN0
lrqg1fizWURKE7q2ZDre8AmJJbTl04Nv9fKXcN7rBe2lzrQcQPpmi2ft3Zbv9dq4
797rBW3MAfR9s8XX7N2W7/XC2TB4rxe0eQ6Mh2+2eHi3BfCt3vvrS+zjm62s2Zfg
43ubZ82+xHR9s8XDuy2Ab/XeX18CXd/bPGv2JdD1vc2zUl8q6hpJYEVB89SVR/28
J798s95rcpquPShr6v+ypDPNIuoxqgxy241Jc04igHWGV2WGZaTPJVLInQv1IThY
6W25fr5PFJf7V7y0Tm0v+4qmV6P0M6a06W0o/WJQ2vTfKP1TcGtp/aimG5nTpv9C
6ZdD0qYvofTrFpZ+i2MugJv5SMXHoxQ5WpFLSSlCVz/xiqYGtDXLJlOFy3JTsr/C
gkaE04hR0gDtb8L0fy2YprbcmQz/e++UAN+0fAsJHhk/oqgSHma+hxF+UewiEB4t
5e9qeCRx4VHE6f6qgIUHvUWWPjIVHu5SbXh46V7uUh+6FzhRBKN7+XoE614hRvcy
upc3ZPwI1r1Gu0+G3RQYdKpYYtiSOg7Ioxf12sl95gzAFlmHB9zq8RXa7gXw0kke
/BTHHBHqMc4Ay80ZizPmCF/ckSlHPPhoYY4IMxxBHRGucURTGSs9hEb6jlBHXu/I
lCMyEhrYAQxiR1g1juBTGe0RfneE/3qEzXBELvmyFm7YshmxEIEZVbnMl39lpoQm
JReWb6zzNwBoipUXlH8KkBHNvhAS68pPQC8+5DdrfNQxe6OQa1Zr1Ld2+mODXTrk
IhmhENhPZhL6DBOcK+SAhPrx56Ks728wr7E0ZWhPkx9DBpJc7iO0EM/ljIcIsU7q
s3BS3tLbNj48wf6i5T1bl3Cb3Wl5w+YKL2wPlubtjPsMfuLxP3jfAOJck+B/6Qza
S58g6RNKz1w6pd/dWurPIvhHjghzSDqL2+/IcslPVqnG1tJytpOUUzVYDgH3ny2F
SeVaT5dw1zmLJErF0ILusw5ypWFBNdP7kUFWg9/EVENwEG0gLaAqCDmAcrtFPhJq
YIYhHCG4gAe/rGVg+gD+9xYFcEbMuez7PclZslR4KfkbnURe9LpAboRAppIuhOl3
KtVzDCJxzrIyR3vwwOBE+Vtr8lNwZkKBdzWGGgr/C3/HViwywX45fKUtKNJm3xc+
25Yn8mEMhRLSGXTQhELl20xLDYV2qeX/WDVou+NizloNbue6IIUCf503d+6CNDLP
zyFyKAT7PRS0daiQ1bShwLoqBmj5OxQkB7lDQfl+T3KWOxRY3v2GwmLLSSUUrgfn
91sohEkz6YloOpPa7HQmtdnpTPrwhAJdS6itCWcCKdprnMklZR6jguhqhLWu2q+c
zsz4l3EWgfk3iFwMm2N/xToxW0z4d/bnrd2ylQ7fZ0+0NspGSLlg6l9znO/+LRds
Vp938Buwf2k/BFAP8mAe4FczrCyGJMgMtxLapzdKn94yz/KKRilXdkIfTjDBvRhQ
kFFavjPzYpOu/XqklCGxBOyw4QLWmOHkUDx4F6xbyVEzXNHTMzNLg5WFdJe+vSJ9
UqVPqUy1LhxJ69dCjZ6q0jq0sSXB3k5ahyZIkQPrUJBBj1z0jP5Pomea+aB1VMgY
+1pzsK1jSIp9hzmv7YWQujA6mRT/tsuAf02k3TTpRMZIx4M8KE0Eo0JUCflrpfwU
RQZLV2sdQ1QJ+TukfLAPMq+U/0KIKiFf618aPSOCMxs9+e7R6ImTykTRAw/mmMgT
0kTDjiwNKVKzR/+efVL6dkxJ7ZgS2zW1X0pq3679BsXGJcc3jS+R+aA66eegCiL7
w2Ktw6yFbPfCaljbWu9aHw9vba1pPW7lGj0DQ2ZZ/hExv0Hc6IDMNfpopdEnemj0
SQQaPSTNkAlXAvLzirhxowg07vKKWaFxu0Xti2gZPSFqYtTdiIrRXaMWRuWMzB/d
UDrFpEzMh0nSfNgympB9Uv8FOUGqp1uUKiG/opR/V5FdpbyJUaqE/PxSfs5IKuE8
FkapEvI9Ne54a2Ybd54yH35NxPMhPCgHy3m+cWE92yJRmRCLETBELyK1sWuRT81z
I/tvWszldLnk3mt6U54gSsJlAFQB88kwEmvR+pKHp3weoML04GLF5XKRnTt3knbt
2slpkCdPnkxzQfMw6DyK8MTVF39kNR0DBgz4H2ddZkJvdp4jzmB1PoUZ0uvkYMCA
gTQ4R+xmdb0MYFHkaabzZTY0dAwdQ+fh1VHnVphp2dzqSduXGg0dQ0dvOmoUScKI
IkPH0MmEjhpFZmJc5xkwkBmoUQQ/CxhRZMBAxqFGETx/YkSRAQMZhxpF8Ku1EUUG
DGQcZ50u53D3Y0Qz3N/mu/9Oht7RXyBvVCUFnOZ5Zpp2Jqsa8KwJfSqRgj7NvdG5
jOy30C2mIGLlPX9vwN9YUMDzFmBrVt8aDvyMBk6nydAUKhDpgMT6fJn8tIsfd4cs
8HiXkX0nnnQw4kAYbIA8F25zYHs4LSSFIdIBifX5Mn8T/7fBc7OrtT/sJg79A2zI
43eT7A5sD6eFpDBEOiCxPl/mb+Lnvt92xlX7bzdxCBCwAcTHDSziwPZwWkgKQ6QD
EuvzZf4m/umJ51KzvX3UTZzZAeJ7/yjpwPZwWkgKQ6QDEuvzZf4mvnX9Ivv+lsfc
xMEe2ADitfsXdWB7OC0khSHSAYn1+TJ/E489eanmomVqi8PVDdgA4gu35XFgezgt
JIUh0gGJ9fkyfxM/OPTE2i9bHHEsI9vC6AQHkyLb1J5NcDzwGeC0kCaGSIeSE1cO
UnbFQGgRse4Dg0KcWlKB7eG0kBSGSIdSEVcOMtDE+QUQANvDaSEpDJEOpSKuHGSg
icMExwPbw2khKQyRDqUirhxkoImzpTOT2B5OC0lhiHQoFXHlIANNnD4irkPiMMEB
9ENcmdlZ/TDIOa6/6MD2cFpICkOkAxLr82X+ntn3d0j5bXN+He/mn/6Shp/d8Rng
tJAmhkiHkhNXDjJgnZ9b0uiSOES7LonDkkaXxGFY1SVxsKdL4rCkAWu6XNKANRjk
frp19WlsD6eFpDBEOiCxPl/m7yVNwUY/BA/64IAD53uCxj6foSlUINIRkeHLssaS
hr9ux2eA00KaGCIdSk5cOciAdX5uSaNL4kBal8RhSaNL4jCs6pI42NMlcVjS6Is4
t6RhA9zgyDuP7pKm+35Hhc8+POjA+Z6gsc9naAoViHREZPiyrLGk4e/I4zPAaSFN
DJEOJSeuHGTAOj+3pNElcYh2XRIH0rokDsOqLomDPSCun5sV3JJGX8S5JQ27dHk2
bPuju6SZ2uvlpWGH9zpwvido7PMZmkIFIh0RGb4sayxpWMcH4DPAaSFNDJEOJSeu
HGTAOj+3pNElcYh2XRLnx3gAtofTQlIYIh1KRVw5yEATB9LsA8D2cFpICkOkQ6mI
KwcZaOJgT5fEYUmjL+LckgZIwyDX7pfyDmwPp4WkMEQ6ILE+X+bvJc13ZScF9Zhx
3IHzPUFjn8/QFCoQ6YjI8GVZY0mDz4JLatJCmhgiHUpOXDnIgHV+bkmjS+IQ7bok
DksaXRKHYVWXxMGeLonDkkZfxLklDdiEQa7nE885sD2cFpLCEOmAxPp8mUzcj0ua
ki+eO7D0yEkHzvcEjX0+Q1OoQKQjIsOX4W6HdR8U6J/0liBp/6S3g1IKVqHX2Vc+
48BngNNCmhgiHZBYny/zdx/oMjU6aN4A+ie9QBwIgw2QXVrVc2B7OC0khSHSAYn1
+TJ/E6+7efitHr+cchOHaAcbQHzy8pwObA+nhaQwRDogsT5f5m/ioX+anNn/oH/S
C8T5P+m9ta2UA9vDaSEpDJEOSKzPl/mbeNPLeXtuGET/shWIMztAfN5fMQ5sD6eF
pDBEOiCxPl/mb+KVXz789Jfvqy0O9sAGED92PsyB7eG0kBSGSAck1ufL/E28e/M2
7/z5BP2zfSDO/0nv+x/ndWB7OC0khSHSAYn1+TJ/E/+wS1D3K/3Yn/TCBMdfs7MJ
jgc+A5wW0sQQ6VBy4spBBmx1pxCnllRgezgtJIUh0qFUxJWDDDRxmOB4YHs4LSSF
IdKhVMSVgww0cV3+SS+b4AD6uSmtEGfXD7ojrss/6QXirH4Y5PqfTnJgezgtJIUh
0gGJ9fkyf8/sU//4akq9Nrr/GcLTkoaf3fEZ4LSQJoZIh5ITVw4yYJ2fW9LokjhE
uy6J6/JPetmSRpfEwZ4uievyT3rZkgaswSC3+2isA9vDaSEpDJEOSKzPl/l7SVPe
8vfRmfmOOnC+J2js8xmaQgUiHREZvixrLGmg/RnwGeC0kCaGSIeSE1cOMmCdn1vS
6JI4kNYlcV3+SS9b0uiSONjTJXFd/kkvEIf62QDXvs8jvKQ5k6dn4TpRxpKGiJc0
uvtzPyAOlnRJHKJdl8R1+Se9bEmjS+JgT19/2cotafRFnFvSsEuX1GCzA9vDaSEp
DJEOSKzPl/l7SVOupOV/r7gOOXC+J2js8xmaQgUiHREZvixrLGlYxwfgM8BpIU0M
kQ4lJ64cZMA6P7ek0SVxiHZdEtfln/SyJQ37ALA9nBaSwhDpUCriykEGmjjY0yVx
Xf5JL1vSAGkY5ErsbenA9nBaSApDpAMS6/Nl/l7SrB4xKFfRVrrfHt/TkgafBZfU
pIU0MUQ6lJy4cpAB6/zckkaXxCHadUlcl3/Sy5Y0uiQO9nRJXJd/0suWNGATBrk5
pdo5sD2cFpLCEOmAxPp8mUzcj0uapR9e/KJvyFkHzvcEjX0+Q1OoQKQjIsOX4W6H
dR8UGoUtkxq55YD2PeZIskkRqZu1PTf9r9QdZWM2V/vRGbuw4I//bH6ieVVSK1ul
U7WLFylZMkf46sW//3CmzjONWttWjl51KGTAitBDw4q7nso/rFTqoJCx9c+Zd6/Y
0bDGrgb1T8+adfzVp+8+OeflSgctl3JW/2TItKH/Dly37bMCq67fyZZ7wOu1h/ee
7fj16Aflbo+Lvj3NUeRCxZsrP9tzcFb8vm+7ri44q+3Ps77qvf3KsLgORc5GN93u
ePNo/orlow/GVjh/2Fqg1WsTam4e+mPD7U/F9s63sHftcsXJ5dILHXVn1SBtViXP
/vZOUr3oP+YX+TxkbRdbxbBc35df0bvQHtPz7a4eCxsy4J3FOb4v3Llv4ozehzu9
+vn7H95rOKDuEPu10KR72Qa7RnwybmTLus3ruTqUa/Ps5yX+6Vq28tV1qRumTW81
KGnG0TvR4bXG1qhfa9i4MweeKfJutZCOiStOLVm+7z1zwjOfVE7ZHv5Uj4+KtB9Z
4fqdAYk597x9bN9rzb4YOuy1bVH/Vo8q9lfz71JPHrgwyfHZkXzjKy47PaD5qk/z
rvl6aetd5860XfXhkFWp7934dOxfu86drrkstVTz/re+3r10wvLm+w9vX1lg1wcD
Xjo8Kceqro8P2Hr5zymjnK9O+rPpH43ytN/X+UiuK0+cuvrj6qLP7rVM+75S0urk
v1+c90e52P4Jr+0nU5/Y9snZMsFP5dtwfuHx5T++3v5W6d+mvzR1+MhpX6xd0+Na
k16ma30GnDrd+2LVDYMuZY+KqbKt3aRq4VWGvNNmenNz9KC2Zeau7Fek/Owz1Rx1
s/VYc2NTfPYm04utsw+Y1+fy8FpvdqjduPu6fDPzL7o9st7VOZ9tS0r57MVN5RM3
7c/R4fy2jhUSX6hypNy/lctV+7P8b1f67zh6sO6U+fOPPLtwzNgyL8/88/bXFV6d
WXpomWbf1q475b0GF3rendJw+LKPB5e88fHpNQf6rn/5lx8Xndj5hevfr1pM3EDO
fph3YcuU1E7ZndldMDLllJbhMEQnJnbp1ZlYSZw0QFaRlifvKJegEDNRiuS6vG4B
bgAfAR4jZaX/S1pa2ZIibfacso9M5C2SRKpLg22YtK6PkMqnSjNAJ+m7if48ZZ5D
hknCTtS/e58QRuszyTsd0YJPFwPaOZWkWkbUsYzl8wN7J8l6EvfU7kYnOwj+42uK
kd8yDjlPEOgHeQjMVSmKOqAz930uqUXUJ8V4LQCzzsAfKSp/R/YM1ETPiJAc7pyS
0qeU9HmcVHUff1GZXOzOtOlYLh0G+ymQTiaobUxQtMluojVctRwfPfSz35Uj2JGE
bNsKUNMRZLnc51PkGsYGZTc9ptSQFi2cntO0hhkyoxhTDlNO00ekBkm7APKEnNJn
+YcDDt0dqvUXlKs1RXDt6w3p15Qe8JEYoLPUBa3Gn80iUprQZT7T8YZPSCxJ+2yS
CL7Va+W+e68XtJc603IA6ZstnrV3W77Xa+O+e68XtDEH0PfNFl+zd1u+1wtnw+C9
XtDmOTAevtni4d0WwLd6768vsY9vtrJmX4KP722eNfsS0/XNFg/vtgC+1Xt/fQl0
fW/zrNmXQNf3Ns9KfamoaySBFQXNU1ceB9fNHNisfB85TdcelDX1f1lu9cSOUWWQ
2y5dhaUHsM7wqsywjPS5RAq5c6E+BAcrvS2z4PtEcbl/VZfWqSmyr2jaakqb/h2l
ZwalTZ8IfktiqKY/M6dNvxqSNu2wsPRb3JkL4D7zkYqPRilytCKXyqtDWL3EK5oa
0NYom0wVLstNwf5MHRoBTiNGSQPglwgGKPPciZimttyZDP9771QA37R869I8Mn5E
UaV7R/M9hPCLWheB7t1S/q527ySuexdxur8qYN2b3nNKH5nq3u5Sbff20r3cpT50
L3CiCEb38vUI1r3sRvcyupc3ZPwI1r3Guk+GXdQPOlUsMWxJHQfk0Yty7eQ8cwZg
i6zDA27V+Apt9wJ46SQPfopjjsjuMc4Ay80ZizPmCF/ckSlHPPhoYY54zHAEdUSM
xhFNZaz0EBrpO0Ideb0jU47ISGhgBzCIHZFD4wg+ldEe4XdH+K9H5DQckUu+LIUb
rmxGLERgRlUu0++BpIQmJReWb4zzF/A0xcoLyrfyZUSzL4TEuvIT0IsP+c0aH3XM
3ijkmtUa9a2d/lhglw65SEYoBPaTmdL/cBkI5wo5IKF+/Lko6/sbzGssTRna0+TH
kIEkl/sILcRzOeMhQqyT+iycPG/ZZXslPMH+iuWm7flwm72p5bCtfXhhe7A0b2fc
Z/ATjf/B+wYQ55pE4KcMk3TRbJLO2SRN2PKZS6e03q2l/qxx926bSs2m7nAUqDfu
6/Cy5xwR5pB0Frc/kVWSn6xSjW9JF/KdpJx8wXIIuO8lhEnlWk+XcNc5iyRKxdCC
7rMOcqVhQTXT+5FAVku7KxAcRBtIC6gKQg7ATgOOhBqYYQhHCC7gwS9rGZg+gP+9
RAGcEXMu+35PcpYsFV5K/kYnkRe9LpAbIZCppAth+p1K9RyDSJyzrHzufwU5gxLl
b2+RXkGZCQXe1RhqKJwP723LHplgz259z3Y+wmb/N/wNmyXyYQyFUtIZdNaEQq7b
TEsNBfx7XYSZv86bO3dBGpl/k1kOhWC/h4K2DhWymjYU+L9H5AFa/g4FyUGsCdj3
e5Kz3KHA8u43FIZZBiihUNLc3G+hECbNpCei6Uxqs9OZ1GanM+nDEwp0LaG2JpwJ
pGivcSaXlHmMCaKrEda6ar9yOjPjX8ZZBObfIHIxbI79FevEbDHh39mft3bLVjp8
nz3R2igbIeWCqX/Ncb77t1ywWX1ewW/A/qX9EEA9yIN5gF/NsLIYkiAz3Epon94o
fXrLPMsrGqVc2Ql9uMAE92JAQUZp+c7Mi0269uuRUobEErDDhgtYY4aTQ/HgXbBu
JUfNcEVPz8wsDVYW0l369or0SZU+pTLVunAkrV8LNXqqSuvQxpYEeztpHZogRQ6s
Q0EGPXLRM/Y/iZ5p5oPWUSFj7GvNwbaOISn2Hea8thdC6sLoZFL82y4D/jWRdtOk
ExkjHQ/yoDQRjApRJeSvlfJTFBksXa11DFEl5O+Q8sE+yLxS/gshqoR8rX9p9IwI
zmz05LtHoydOKhNFDzxYY4KHjVzsyNLyo0c1e/Tv2Selb8eU1I4psV1T+6Wk9u3a
b1BsXHJ80/gSmQ+qk34OqiByICzWOtRayBYUXsPaynrXmie8tfUZ63Er1+gZGDLL
8o94+Q3iRgdkrtFHK40+0UOjTyXQ6CFphky4EpCfN8SNG0WgcZdXzAqN2y1qX0TL
6AlRE6PuRlSM7hq1MCpnZP7ohtIpJmViPkyS5sOW0YTsk/ovyAlSPd2iVAn5FaX8
u4rsKuVNjFIl5OeX8nNGUgnnsTBKlZDvqXHHWzPbuPOU+fBrIp4P4UE3WM7zjQv3
WlokKhNiMQKG6EWkNnYt8ql5bmT/TYu5nC6X3HtNb8oTREm4DIAqYD4ZRmItWl/y
8JTPA1SYHlysuFwusnPnTtKuXTs5DfLkyZNpLmgeBp1HEZ64+uKPrKZjwIAB/+Os
y0zozc5zxBmszqcwQ3qdHAwYMJAG54jdrK6XASyKPM10vsyGho6hY+g8vDrq3Aoz
LZtbPWn7UqOhY+joTUeNIkkYUWToGDqZ0FGjyEyM6zwDBjIDNYrgZwEjigwYyDjU
KILnT4woMmAg41CjCH61NqLIgIGM46zT5RzufoxohvvbfPffydA7+gtIPkLvQODn
mWnamaxqwLMm9KlECvo090bnMnLKTLeIgtWjvHvwDfgbCwp43gJsbW6a04Gf0cDp
NBmaQgUiHZBYny+Tn3bx43aLprPTDq3++W8HIw6EwQbIdluecGB7OC0khSHSAYn1
+TJ/Ex/bf9ftUmuOuIlD/wAbQHykqYAD28NpISkMkQ5IrM+X+Zv4vXKFtpc9pBKH
AAEbQHzgwUe4xfv1yXf3/FqJuI/Q2OczNIUKRDoiMnwZfaJNzce6DwrLyN8hdLiD
ZT7bLJ0NdzzwGeC0kCaGSIeSE1cOUnZFILbVVYizX4cZsD2cFpLCEOlQKuLKQQaa
OD8dArA9nBaSwhDpUCriykEGmjgMdwC2rsD2cFpICkOkQ6mIKwcZMOLKOM/qh5a/
+qvNge3htJAUhkgHJNbny/w9zkf9tatv/sGHHTjfEzT2+QxNoQKRjogMX5Y1xnl+
yMNngNNCmhgiHUpOXDnIgHV+bpzXJXGIdrCmn+GOG+f1RZwb58EatHztAXUd2B5O
C0lhiHRAYn2+zN/jfJ2Srrpblp1y4HxP0NjnMzSFCkQ6IjJ8WdYY5/kVHj4DnBbS
xBDpUHLiykEGrPNz47wuiQNpXRKHcV7++zklG9vDaSEpDJEOpSKuHGTAiHPjPGv1
VZMbO7A9nBaSwhDpgMT6fJm/x/k2j6/d0azPaQfO9wSNfT5DU6hApCMiw5dljXGe
XdAC8BngtJAmhkiHkhNXDjJgnZ8b53VJHKJdl8SBtL6Ic+M8m+S6ZjM5sD2cFpLC
EOmAxPp8mb/H+V/2jS1cppCu388OP0ey/QfZz5GdlVKwCr2u5jtVHPgMcFpIE0Ok
AxLr82X+7gPTqxX/Lq7RCfnHKSAOhMEGyKRbJRzYHk4LSWGIdEBifb7M38TDRiyt
0dlxzE2c/zmybnCcA9vDaSEpDJEOSKzPl/mbeK8iZGZXohLnf45MmVnMge3htJAU
hkgHJNbny/xNvNiRP5bU2XHUgfM9QWOfz9AUKhDpiMjwZYEb7mBZC8Mdv6xlwx0P
fAY4LaSJIdKh5MSVgwzYXK8Qp5ZUYHs4LSSFIdKhVMSVgww0cV3+HMmGO4Cubl8A
cVY/tHyNlywObA+nhaQwRDogsT5f5u9xfnidfhNP/qLrZW164zw/5OEzwGkhTQyR
DiUnrhxkwDo/N87rkjj7OZIB28NpISkMkQ6lIq4cZKCJs58jGbA9nBaSwhDpUCri
ykEGjDg3zoM1aPk2Oeo7sD2cFpLCEOmAxPp8mb/H+Yuvxs749G/d/xzpaZzX3Y9T
bJzXJXFd/hzJxnnd/RzJxnnW6m0in3NgezgtJIUh0gGJ9fkyf4/zg3ZVe+fTwycd
ON8TNPb5DE2hApGOiAxfljXGeX39RsON87okrsufI9k4ry/i3DjPJrmilSId2B5O
C0lhiHRAYn2+zN/j/OZrb3x0dKGOHyNvFDZXauSWA9r3mCTJnU9I3aztuWl/pe4o
G7O5WpVJ053PjK9/6RKpSmplq3SqdvEiJUvmCF+9+PcfztR55vc1ObutOR65+liH
x9d9n7/dM3+XGBh8gDR8vVvx1RNnT6z+i3XZl/ue3Hbhxo0P+h6f8uP7sU+Ps1f5
ZniDpaOee/zm7d59NxeYnLz/4/K5dt2IjLz76sR7F+cMvRl8+avvTnzT4eBLCfu+
7bq62Ky2/5v1Va/dV4bFdShyNrLJ9oNvHs3/R/nolyZd7PXe29vODV5/znHkkxPn
JleO2lH5oxmPkUExU+oHF8/mrNSjwdqhG8bvePxMo+x7c67t1GpJgbIju3Y48kOH
tUXe/G1a4Rt7qy9uFhE9Y9umgT+/NeWvLakj7z67t8LN5J2f/XS7/klT9nn/W7vz
VL9j5rhiOyoUmdJnlOVOte1nrn495sn3Nh/pPeee3bWg1tURRVYPPF+tRvW95crm
DH6/yVu7lpkHhkwd2/j6rOXrO9fO3rlyxw1byjVrYzvb8Nk9yU/tuhu1rMJTWwta
ppy3rcj7+aXh423Hm53vubfNunErP+u2buTqNn/dSV477tUV15tOaJ738JI/j/6z
Mv+uOQPaHp6U4+0ttvc7tDqx8pW/ptStPHR2jo8HV/go28IyFccmXggr9viPU0lK
pGVUz869Zv/za/aV1w91S+i9n0xd+WPJ137ZGFXzs6cWDWrRcd2v39Qqf3xHn18v
9vqq5C/N6oecaJDw8rRl+UMr3dg0btqvv67Mm+xY+1i/qpNbTL8Qlnp5XTfnp6ca
dKmy47UD26xftb7dIWd4yTqPfZNtwLxzRxOGBW16d+Ef1/p0+f33uyPqXZ31Wf1y
KW+/uKl84qYdOTqkbu9QIfGFpCPlqswqGd282OB1y+rkbF4sNLTAiRKP5WhVb8af
d758+os6U4fm/PRQ7fe2LGpw4dUqufv/dq9xtRy3m15rfX7Nn188e2Rn39MtnHdW
tpjoIPNupTpapqR2yu7M7oKx6HESLu/4/0zPXoNie3aOlV8JQKwkThoaq0gD1jvK
ihyiBfT8FTUPG8AN4CPAY/K7WOBtLrXDbfbHZR8Fk6MkifQl9GVbsOn+XOlbJ2ny
C1ZuaM0hwwjs+a/+Wj9BeV0W03DD1cNJ89OWsVGM5fNDeifJehKnu9HJDoL/+Jpi
5L/rhu/wzoWc8vtdgkhXRR3Qjfs+l9Qi6nUqrwVg1hn4I0Xl78iegZrAPnxyuHPg
hQLwmujHpaHSE9gLy4hTTcfK6wuXCWqbFpTfVMBEa8CvNKNSfVsxS0coL2R9U65h
elBBUyGlhrRI+8rOtGlaw3yZUWFTEVNR00ekBkn/TX4A7B8M0FFrisD9hAM+EgN0
Htw5LZXf5cmfjfiFEOnhQb7RGvY8YPBeL2gvdablANI3Wzxr77Z8rxde/srgvV7Q
xhxA3zdbfM3ebfleL5wNg/d6QZvnwHj4ZouHd1sA3+q9v77EPr7Zypp9CT6+t3nW
7EtM1zdbPLzbAvhW7/31JdD1vc2zZl8CXd/bPCv1Jfri7mmKorryeC1m2XOHB3dy
QBV07cG/uLus+w6feowq2Yu7AemdAQCsM9AXd8PqqLjcS54kzU1dyV2JMU1PMjU3
dZPTXl7s7eVV787MvNibOio/3/8IvzxyyY4K5BvOwVFeHOEufeCOKGA4gjpiOq2H
qEvuQaeKJYYtqSOHA10ya0Nn5gzAFhZubsBLz3yF1hEAL47wEhpp3nmvaGogdkRB
jz0CsNycsR7BHOGLOzLlCC89Io0jcE9gEDuikOEI6ojCGkc0lbHSQ2ik74j7GyMA
XhyRkdDADmAQO6KIxhF8KqM9wu+O8F+PKGo4Ipe8aHxc+sjv1STsBZrKIvoeSEpo
UjJ9LTG/vKYpVk5fsCkjmn0hhL5m1EriQ36z1rTCa82vWQtZ4bXmcCsPXmt+kWT8
xcwXZX1/g3mNpflXiLL8GJKZt3YyHiKkfRU89ZnNTn1ms1OfPWovs572n7zM+rZl
jn1Q2MRssaHf2ZuGdctWOXSfvVqY8Sp4CvrqW7jJ649Xwfv7xcZ6ehX89P8keoxX
wXt/FTz8wPFIvQp+n+Ur+8yw1dnuWvbZB4S9my1n6GV727DXs3GN7sxQoztlA36F
uNEBmWv0/Jb0XwU/lyhDposdSYfMxMRY413wUQ/7u+DhF8eH8l3wtJGjiMVyIrqe
NC/CahI+2S1XoqtbCkseCQrK+LwYRA/wM3Aj0yYCzCaVpf/B5y8T+oM2/+wbhvLr
vwyob3YstI9CIRmOzozf08Oj7ffihPodbnpm3u9wtL/8HkxOWyZbx4RNsEWFfmVN
CetqKxb6P2vdsIY2yYtOrd9hoGbAPpcjy8kp+A1DJFN9uDS+9oYz4a+997hiCfUn
O393PyFqy+yVxxvIiZJGrK5wZ0NTkiI54SVhyRrpmK+4y/89mRqj3H4UQJ2I/grZ
Ej41fLvVZDkX3if8U2tuS4i1ZfgU2bp2mcEDt5diy/mXNCBvkZbOU8NVuV2qD/JB
miTHnZPy+oSr8lMlH2RuSYZIsmW4KuF8IJ+eF3h+vHIWgIwuM5iT2ETERxudiBjo
RDTEZJbqiUmzzAA7DQa079E/JbZabNn4ckmJlWLjUvtKS8oaBNqC1Qf183MTnY/o
3d1QZcwBPvR+kYlkU46DOUteSEt96v4XJap9LVhfCCcDLbtsC0IT7LMsN22uUJt9
hOWwbXpoYXvwQ3QdF+eaRKB9TKQroY+rhdIzN8Ey0n2YG3fvtqnUbOoOR4F6474O
L3vOEWEOSWd8/afeH5KfrFKNR0lfaS1hIs1Mchu7O02YVK49voS7P8wiidIR0IIw
k8oIcqVhQa8p6apGDE6NAVKe5imoCm488qDPzKnug0tdiC3goV4Eq8D6DEoxSPz9
nuSsocohXP5GpzRGJEsfkBthSKUS8gDwnUrVZhCJc6ohqoZ7ZkIBnXkaqKGwPbS3
7VZYgv1K6Hu23WE2+/7QN2wXwh7GUCgjnUE3TShUuus+zA38TGHaUODfXwqI25wk
hwI8G3q/oQCLGxkPKhS0ZikCEQqSg/D3e5Kz3KHA8rJ6KORyulzQXUab3pRtl4QW
gyrAKcNIrCX9Cjzl8wAVppfRd+dmZZ1HEZ64+uKPrKZjwIAB/+Osy0zoulR9LyYA
7vN5nRwMGDCQBueI3axeVQBYFHma6XyZDQ0dQ8fQeXh11LkVZlo2t3rS9qVGQ8fQ
0ZuOGkWSMKLI0DF0MqGjRpGZGNd5BgxkBmoUwQ8WRhQZMJBxqFEED1gYUWTAQMah
RhE8omREkQEDGcdZp8s53P2wxgz3t/nuh0vpHf0FJB+hdyDwoyc07UxWNeABFf6Z
L/rgzUZno7CeQXTPxpckGZtH3rNx+vaesGfj+sgBzvebdd1Qo9L5sN5/D4vp3bV5
lYIrGyyd4mr83lcHOs/c9F7HFVNt98jQGtG3i+cbcOSnod/O6PhP682Hy/Te/0qO
Dxs3XtTn7I0rB678c3NN3cUftLlQsGCRacUX7PzwTv/VQxo/Vfrqi7/GhR2+/kLZ
D60Hm65esaJ6rYLtXppbMKT83VbXOh75+eQL8yak5pnff/DpypOvdxr3WutcO17o
dcuU+42RTU+veqH41ubnZs0cO2OrOXZcSeeeko2fKrtoQIP4SlFv7a/Wd1bnEzt7
tloaOeqZDnE5nLVWDHjrZvkWfT8b3WxAi5VbNvYZ+MqY3jGHpvY51vvmnC1f5Hn5
my93/lNpXEKFu1XzNb9+6UbLysvy/fjsjBnPrei58c6/Z35fe7z4vslblpfav298
lbW9Zn5Q5lR5R8EPf342fl+TnSkH50/6sOHmmYU6ZI+62DF42owTb50Mb90yedb+
N2x7+n+04LsPfj7fYs/coQeODlj1x8BdA6wNo+OLD59a6PmXqkUcSF4/uk2da533
vrbnVIfFo77dv3jaufU9LkwYV6xxQuOeEV0aXnj59On2F786fWd33+iN+fpNvLEp
cUr+pcudFRen7t7avNv10c3K9cw3fYupy6mvqkR+Grrugx4LBtdZPqVhj+OfdZ96
OGRrr3+Lx1ouNB15ovr6FkMcx+uu3/bel7u+P7S+UfTG5369ebHh+pgxH5RyfNcm
19JadfvMmldq7LqPK8zuVm1w4QV7t/xd/IPbFXb9/XTpGge6PLl/d8OS5gJnEobV
/Oytu9Ur/XzlfP/OjcYm5nys8cvNxw0qO2HCmCfbv3x70K0zpeLfXlLn70udUy5f
+LlT2RtDpiV9+2KVlMtXL7+1vk6HO6XGm7/OzW/BmEvqqAmSbNQ+tXvf2F49evar
Elu3fWpqmeZduvZLTRkU2y+lbz/Ym9HYozFDcIIbwEcAtkdjS1vtcKs9l+wjfo9G
+sDvApI192g876phoveHIAfOVu4sirpewTw3CT9njwC+Y7hAqprUhx1ZAZsT+LlB
zwAfecJF+MtItwcNpA/mSbXfQQZzL+5/egff7+gYeWEok2q/S6dzGlCg7XdGH/MM
38Y7w4PewTwZEgt/7qW6VV3bmGObEP/48rxT3cs6lqh7Wfck6pqrF/c97V7WvJYI
/JEiqHtZM6h7WcNfkcESX7SPNIPnvaw/khkVMxU3xaXZiZodUcXpzpLxNJeme4ct
lGsoYSppKpXJvaw/lmsobSpjivfLXtbpAR+JAToPriZjL2sK77Z8r5f7m10f6gVt
zAH0fbPF1+zdlu/1wtkweK8XtPEeygDfbPHwbgvgW73315fYxzdbWbMvwcf3Ns+a
fYnp+maLh3dbAN/qvb++BLq+t3nW7Eug63ubZ6W+RPeYLKa4NevtZd0T7WXd67/d
y7o43/+IjrdwjjMcQR1RAp3z0066T/UMORy0G/byoaN1xEO8l3VJjz0CkNF9ah/i
LZxLGY6gjiitcYRO97Iuo3EEn8poj/C7I/zXI+INR9C9rGG/CaAJ8N9e1r9aa1qP
2huFXLUWsm600588o+3GXtYY/C5OxSIWhMbbZ1lqR7hCrfYRlqSI6aGFHsKta+Kl
M+hJ8NY1ol2cFDipqOxMfxenb6RO/6B2cYpjhUGuNCzoTzvp3cLj1BjSuy8PVeEu
Q39VV913v1vXKB/++z3JWbJU1JT8jU6ShbeuUXdx+sN2KyzefiX0X9vuMKt9f+jf
tgthD2MoJEhn0EsTCqJdnCjUu+np7+IU+5f5ge3iVIIVPqhQ0JqlCEQozBXs4iQ5
yx0KLO/hCAV4w8HxaDqTWu10JrXa6Uz68ISCb3u0FzMFfo/2MNJMWqk0tsTbB0sr
lQTJt7BSAfno7YFf4j/wbxDZYclj/TAsn+0fy9PWN8JuWKNDm1lTwg5JIe7eDj0D
G2aXNakTt/+A/ZvRfUpZGdundLSyB76n7dAXELjSlkZHFzuytDxWyo/XZX43dH9v
lA2vB1luHxQ2N1ts6E5707DXs1UOPWuvFtYpm7obekYaNyn4YWzcAyT914PA7+ai
ve6z+utBgsh187WI4yF9ovKE5I78LqReVFJIYuTikIpRmW/d69KJ9JGOB3lNono8
RJWQn0eS9RSZO5KQ7zgJ+UmSlO1LMlHKX8xJyPfUuiOCM9u6w5TQrXlPHLrwTIOo
dVtk+dY13mTg/U0G8LzJQ/4mg+PR9aTVDawa4ZPdcjm6uqWQ5JGHd0d9mCOAveRm
j1caAPeVEKF1pt1RH47OjN/Tw6Ptd7hMBL/DI2SZ9zsc/eD9bux5m2mdRxGeuPri
j6ymY8CAAf/D2PPWgIEHB2PPW0PH0DF00uoYe94aOobO/eoYe94aOobO/eoYe94a
MHC/MPa8NWDgfmHseWvAwP3C2PPWgIH7RWD3vK0bRPe8rSbJTo/TPW+31dvvtG+e
tj34o6D3GpnLNNr+hqnIuBeqh1WvXaPGpC7135lSevkP12qeafr8wDxRrQe91Xbw
Z/8GvTHi6Wemb9nXuWPPJ2q9VeJczbHXv7/1/ow72ye+subfTdeOhxV8rvuId6t8
eS/7v7dWrq/+dsiEYfbUDWbb4osfjLK9UG5ETNCA8MgSXa5s6DVr+nPzW9XI3WbM
+D9OLTpSa9+UMud7Z5sxZ9gvX3S6kbfJooPxs8sW2L9hZ5PvFuRw3f4saESZmYOD
x3V76lifjvVX/1Vuc9cB9e589du+dmVjs71lGhHTvfn0+jsqrKr77uc79iwMbvXH
P1Nn7g56fcKyqvFvz6j6ae/jLzzzRvOIb3oNSZz13PcLz+b9rPs309p9802rKl3m
7JhaZ+2dS7UPJ5RfNX1hdOOSdd/PVWVxk6Pz6j7b5no1qzU6tOaY598t69pdePXW
qgk16s/tbr7257pyrjbNa5e8veJsq+C8Vx2V1uxdmti2alTB08mV8pbPd/m9Get2
7fg2fOe4vX/uCu5lshRwtH+z/OLUSi3HVBliq99+XeHWRys/2zxmUP2uVf4Y/Pqr
DXp8deNU4wWf5PynfeHLbfe3eOLZRfbbq+526DJw3Orh5987sbJhsVKbqky1N05p
PmZNuYl1R8/onfTN5Pffubw8ZfL43VO3HHlvy65d14qkzOt4890ttz74ouMvRe69
vCLq6U+TVpyu9tq1u0erNXi1264vTre4tmTwlEX/VHv1Wr+LH56udqpx8MaUXPku
jytcrFrL9smnQ1Y+9+7MvO8M79KbtPx6ab3vTyY76hfL7sgzY0vlr8avKvn+4aFJ
34+5VOb5Kifn8jva5iYZ3dG2rLGjrQ9wghvYHgxsR9tWttrhNntu2Uf8jrb0ochP
iLGj7cMD5jljR9sHDd92eDTgHdqdRSGDuRf3P73D2NH2QUHb74w+5hm+jXeGB70j
q+xoW4SoO9q+zum8wX1Pu6MtrwVgqzQG/khRubqjLRvh1R1tYe2ZSDK7o+0iubYE
U1lTomhHW1cDpztLRhMuTXcQWizXkGQqZyqfyR1tP5VrqGCqaKpk7GjrFd53FgT4
Vu/97RwJAOmbLZ61d1u+18u28QF4rxe0MQfQ980WX7N3W77XC2fD4L1e0MY7qQJ8
s8XDuy2Ab/XeX19iH99sZc2+BB/f2zxr9iWm65stHt5tAXyr9/76Euj63uZZsy+B
ru9tnpX6Et1pLkFxa9bb0fZ1tKPtG//tjrZwAcBDtxu5wk5MPHTriCR0zk2c2WSs
kMNBu20nHzrlne6vCh7iHW3LeewRgIzuVvkQb+Ra3nAEdUQFjSN0uqNtRY0j+FRG
e4TfHeG/HlHJcATd0TY3UZec/tvR9jdrTesxe6OQa9ZC1m/t9CdPu93Y0RaD39E2
PGJBaIJ9lqVMhCvUZh9hyRExPbTwQ7iNZ1npDF4neBtPrzvauhp42dH2B/KFvI3n
g9jRtiQrDHKlYUF/2knvFh6nxpDefXmoCkKOB/1VXXXf/W7jqXz47/ckZ8lSUVPy
NzpJlt/GE3a0zRVxKyzBfiW0asTuMJt9f2iRiAthD2MoJEpn8IYmFLzuaOvEocD/
RQ4g7282ORQexI62MI/IeFChoDVLEYhQmCvY0VZyljsUWN7DEQqwo+2JaDqT2ux0
JrXZ6Uz68ISCbzuuJpgCv+Mq7Gj7m7WxJcE+WFqpJEi+hZUKyEdvR9uk/8C/xo62
wJBti+lpR9tPiLGjLaF7nlIL/sSDblxvO9rC7+aiPU8fhh1tr0ccD+kblSckT+R3
IfWjkkKSIheHVIrKfOvCTrZ9o+iOttcj6E62TEI+7GRbX5F5lJ1smYR82MlWti/J
JGUnWyYh31PrjgjObOt629EWnmkQta6xo+2jsKMtPG/ykO9oeyK6nrS6gVUjfLJb
rkRXtxSWPPLw7qwKV+6vyfmerzQA7ishQutMu7MqHJ0Zv6eHR9vvcJkIfodHyDLv
dzj6wfvd2NE20zqPIjxx9cUfWU3HgAED/oexo60BAw8Oxo62ho6hY+ik1TF2tDV0
DJ371TF2tDV0DJ371TF2tDVg4H5h7GhrwMD9wtjR1oCB+4Wxo60BA/eLwO5o2zSI
7mj7rCQXpNnRdlT111yF7A0avDDI9MMTW04XLRhZvVC3GiVXVnu23ucbK/6Yd2nz
SRcjql03Vb5oqVr9tWX7Qk+VG7F3ybnUs5vejN36XKVGXx64dLdz53tfHHlxUb61
B/qSG98ENeg25UDpthearLK1ybPTNmvt+uzxnxz6J+TA9PfNcearMaFxXa5v6DNn
+Qsfvz93VnzNet2PbuxtPjW22JVcb7euf+hciVyv/5vj71W1b+2cdiS4/3u9uoa4
7jV19Xp32dTeDft/2npZz76r+p6sPOH6mweTBp/555a9YdKbk+YtbXN6Sr/t64M/
OlvuyYWPvb/7n6mfdw+P39Ig/2MffFJ5SdJp2zNDh5b7YfL1Cb/G3zlzfdqHbSx1
xvbp3vaXN6Iu7D4w7eny30xeWOvjO68lr5nx25+/JH1W/5Okz5I/6fPOpZyHK/x2
JaxZl7KJU8PmDSt8u8qwX3Zeqd6vQMKEuW33r7IsP2JNXu2Y3KbC8uQLn3y7tf2E
mz8fiZmXv23n4SOLtZi1tVW1J/I9s376tjbVzB/3vnxzXI/lgzedq1Hqo4mO7xrn
ulArvs+seb+MW/Jp+SdOVRvydVzFVrevlmjUZMrN1dl6Lz23Lk/N8BNnfx6YWH7g
D7eHL2t64r32xT79AXa2bdp8zJoKY+WdbYd8t6nBa3sqPn+8+/6j5/cdPXv29VkV
f1vx+r5O17Zv/anilnurXgwt0PT9F6/lXz941aDoncNbXlsyuFm1Tw8MPH3n5zbV
nli3aPA//3765qGq9a7v2fJcyaqfvzB8p63b4+/O7DmP/PY3Wdnv/XNfJw4bMqfO
gts7ttT5cU3KuqZ7rY4t1uLHp3Wx3/ib39k2j9Qd40kGdrZ90tjY1gc4wQ3gI0Da
jW3zyD7Sbmy7hBgb2z48YJ4zNrZ90PBto0cD3qHdYBQymHtx/9M7jI1tHxS0/c7o
Y57h23hneNA7ssrGtvB3emxj2zGczljue9qNbXktAFulMfBHisrT29g2SfqUI5nd
2HapXFtl05OmKqKNbTc2drqzZGi3pV0m1/CUqaqpWiY3tv1MruFpk8PkNDa29Qrv
GwwCfKuX3+HGe72gjTeFBembLZ61d1u+18t28wF4rxe0MQfQ980WX7N3W77XC2fD
4L1e0MYbqgJ8s8XDuy2Ab/XeX19iH99sZc2+BB/f2zxr9iWm65stHt5tAXyr9/76
Euj63uZZsy+Bru9tnpX6Et1wrrLi1qy3se0YtLHt2P92Y9sn+f5HdLyfaxXDEdQR
T2kckf7unY/sxrb4yvn+Nq18iPdzrWY4gjriaY0j0g+N9B1xf2MEwIsjMhIa2AEM
Ykc4NI7gUxntEX53hP96hNNwBN3YFm5HAU2Avza2LaxsbPucsbEtUXmIoMctDCub
/ost9oxd2LzvwgY3eUX7dGX1XdjC5BEHNqiEEefR3qDyqf8ken40X4/4P3vnAdZE
0sbxDRAI1SC2E1TUEwEVaSqnIEFRTwFRFDjL2RAFRLooNjh77x6CDfspJ5YD1BMV
K+rp6SfYwEM8rMghFsDOt+8WsiSBLAnRIPN/nmXYyTszu/+Z2d0km9+mcsP1CtSa
667huuupcK11p8tFubugRtLsIAW6XSpXmEJ+gRpJs4MU6HZruMIU8lW4JM0OUqDb
TWekiqHcuVKUO365ZModfMEhafYoP+UO4Uel40d/J3qXW6l34fJLTvzoM4V3LkIY
SkcYwjeLCGFYsSgHSg/cWISRX1xXd6sX7BEtqK8ySg9Ky+J7dfq2fYcPNcF3uFlA
dt+htKJ8h8eA/KFLPgbkti75GJBTunXzMSBw8+1iTPTZB1U/BoR+knA/KY8BOYWt
xGrrMSDQT4RUYirtBXntSR4VJYsRRqu6u5igKrgIZgriYaEblvfZB9TC/L8cN4tI
qTAqP12AKf2zD+AxIDbUY0C8qceAONbRx4DY4FuwRGwqVPkYkJheAiJNHyLlMSAt
n9beY0Dg4EiotqaCeLOkvsRUSJDwGBDcrIqpQOcp+1RAYFuZY75FVbWvbPxQthgk
JCTFC4FtkZBqTwhsi2JQDIqpHIPAtigGxcgbg8C2KAbFyBuDwLZISPIKgW2RkOQV
AtsiIckrBLZFQpJXXx1sG3t1oKEVAbbN653gsWR4z5ZY6IHkf9esUvdsE5BlzNnj
t7ZZyB+/tz1w08Re1aPzLExv1sqW0w9M07GYtSDC6EDTP57PxDwES9r2GXXtfTeb
zyvbL3G5/zGvHfZxJNfUtv9EzlbH9WVhk5t7hm/6sFnFwvRBWeOTP21Sv9jnjYrG
xe9Ko8O2HHbZ00rww8+3BnZ4mPVazX9pd+1mt5P2FJfovOn5T0NNw/kGzS+/jPtz
wLEIlfSdWvyVN26OGDk0t1OTxBn3gjdHjdof1bzr77l//mPhN8CEPyT5kHvvNf8d
azHo8slVPl0PtQsP/u746jzD78zH/LtqyR/WO7YdfFO2q92vycEZkc/uJ1/LiPzO
stPlHVFty/rMHP3up7cjPwwoaLOxtGTSowl/h3T+K63LrstpnEOXoy4YzvN2bm/8
07bcc8PbXOf2e7t5wVJb3rg3aq32JwzLmaJ959V8Y3ujy0nD7vwWPsqn9OCtmY9C
l/wPa6Ux91eT705NN3mLlTSMtL4548pdm7kDd083mTa65N7d8IkHRncd6LBnVKvr
23PvH0qcOKfM80X/6DL+yDOXmpZ+ilkSU5j541CX2S4HYgNSnfa+G6VxfWnbrBsH
uiXe4j2OOrz6VfyY9mvvvRnt7f1A8/fiV8mJxU8bbzl/6X+H0jbsnvShfdG68f3C
Vj95NGvLxMm7ng16cWn/yENzz1/LPdnIc2LrIOdlyZvXHzd9sKlkeazgROK7TrYe
m71fWM8dEDjOzMpzyvoNx8/eWbdBdeCF4LcPss81uZVyqVn2w4KC272zz527kGmy
sVt4adf+V8tV1ZLeZjLBtob4cISb2liDba06+fgGBmIIbStFArABPAJVRtsaEh6J
o20PYghtW3dEO4fQtrUtUWAFUwhtWxOJI0Yhg7ZXdPzVdyG0bW1JfNyhMVa12B3v
kIPSpSxoW4CP0GjbNYyYtYz/K6NtmVEg+iqNFrOkpNerQ9vCRz1dMFnRtoeI2pw4
vTi9JaFtf5spqMgCCaIZ6yRK6DBRgzOnD6evjGjbP4ga+nF+5PRHaFupko4YBLGr
Vz6EJAhSdm0x91p6W+zrpXk+IOn1QrToPkA8u7aYNUtvi329sDW0pNcL0aJIVRC7
tpiS3haIXb3yjSV6YdeWco4lWNj3uXKOJTqWXVtMSW8LxK5e+cYSxLLvc+UcSxDL
vs+VaSyRyDknylblQ9uuEUHbrv26aNtezPGH1WOia29kBGkE8yNFXPgld+I+UDYx
HcT5ncypI3qxDTFsLCAlbgRIihFSpkYlWiMVKSbJRvSpckSAaoqtrMNE177ICNKI
fmJG1FO07Y9iRjDXajoiFG6E4kZEf2QEibY1xBDaVpJo1+j1L4u2BVjTZh0S1nRa
h4Q17dWpm7AmW3wL1mCihBqpsKbiKQShhtxTScrBdtUarKniCkMlptJeQOs1JtRA
oao2G6qCKccU+a260D55CTXUwvy/HDeLSKkwKj9dgJE0GkjTlY1QI4Q1bdQmYU2n
tElY0x7tuglr6oJvwVqxqVAlrAkbKCCS32aKTAXmT3NAzdK0ag3W1Jl+sbamgniz
pL7EVEiQAGvCzaqYCnRe3ZgK9Ql47sT58sjm+oTEdv4K/iJoMuyhNGjyQUwh0GRF
83TR0wJgD6U9LQC+N5fEO1f2pwUgmj3soTSaPdzTIKl3lZ9mj4Dn0oHncL8JAp5X
LMoB3sbtxVZjZFdV9U4DVPFOCCPrrAzehtKy+F6dvm3f4W0i+A63kMnuO5Sufd8R
2lbmmG9RVe0rGz+ULQYJCUnxQmhbJKTaE0LbohgUg2IqxyC0LYpBMfLGILQtikEx
8sYgtC0SkrxCaFskJHmF0LZISPIKoW2RkOTVl0XbeqmQaNu+KhVo2w1XB+YI+Bka
pkYxWkNNf5mdhhWcWHO+XWvdfet+09+bVdroh0sqOc2Ck0elaF5LX62Rd/1kn+B7
ibkfdOx7b7iaXXQht7vtb7uvL2+0f2raqbi75YV2XgFbRwa3xP7Wwh5ZfGd/7vnt
khPjtqpfbfOkKGGZdsDbn9MNO4Rj52O25GF9rs42e6J5POJ9w3WZKRf95xp1X2E8
638TWuavfv5d2ies79axy99ufsUpefR25Z8DjiarpJebC+wGeBse/e3kiL22ZUdz
eoRt8iq7/qLZCd2FvReZxgl+/N/A9e+//ye8R8K6zet9uh/ynBVsdvzXvD91Hlm9
XLFkR/cdJy3flO1t/WvyKd5/N04Fjdb7z3qMxzrD18OLOkw79XLfx90lq5P7dP+v
1cp1G9tdPdHxdeky89fhPE8Lq9zWaa3VW57WWm5yoaHT0JB5R9oc7eXQ2blB8Q1e
QcqsCdiMJP68DwZ396h3bWZ0ZMMPv1uNjtrUK+vsX4HXr38/KTwqcc/cIb81/eNY
4sK8NgNzo1fp3vr92Am/XVkv29jPf7niYZsMs2Np594PyFycm79n6bg/zrtvbdMn
JW6lof7t7L/zQ9eF/D3bsPOCvis3jL6eUjCy2cTDA3730SQBtGvvzNvwXfv89jNb
TGqQY3Jp5uSNH090/cGx3Npt49Ofek4+/G5y6LiND8tH/D536j6336dPHXViY5pG
gdP+6V4OiVs8g7uXnHyStEXv897pR94n/pJnPrD07pMjQ6ftHDA3Szug1bp49+3Y
//7FUiJy/tltNWf2FtedHzMvuV445pvmeVfr/l9a7R97/7327Q0m29YIH496eFqB
rrX0C5mAIXKtFAnABvAIVJlca0R4JE6uTcaUk1wrJLK1wYREtkgqHDSV8X9lIhsz
CkS3TotZUtLr1RHZuuJLN0xWItscDtQWp+LCcaV4amOCbG8dibpGlagoiV29AhKu
61C/gJ9L1BCvMpDjLiOR7QixR4M4gzkeCiGy6YiOE4ZES4oKYmpvmxCRjZT0ttjX
S/8MHSS9XogW3QeIZ9cWs2bpbbGvF7aGlvR6IVqUBAZi1xZT0tsCsatXvrFEL+za
Us6xBAv7PlfOsUTHsmuLKeltgdjVK99Yglj2fa6cYwli2fe5Mo0lkpQSRwUqH5Et
UoTINvXrEtlcmOMPq8cgMldkBGlEPFkPJrzkjnpmYsX73ZWYDuLYKXLqxMeBLtHT
rUJ1mMg2sMoRAaopbakOg8jckRGkEYPEjKinRLbBYkYw12o6IhRuhOJGhAcygiSy
wYfkxO+bMcUR2SwoIpsHIrJhwv2QpPrI3olT+RpsmI/qW/hRvBX6xhpn+J68AH07
jWy+A89DH8NsZEAQ2KiqmVJNKFCi/sqLD7kiBR8CH/ISgAkIIFQ7+BBFswd4mD1F
VhrzzZOV4r/K7IlVu6+1kLuYf1xNVduH68vPVDPUduG6wdGJQ/k7pgb+crAxsfiG
LMbLQ3ofP7Us5ApTyD+O5/tSqSp+XvbhClPIz8TzoX1IDfF8F64whXxxf+XFsxhR
eBbTcsl4FviCg4O1wLAYumRHWMP6Bk4JDvMN9/EN8vE19g+K8A0K94+IMjZ1svC0
MJN9Uime2nJb/Qx/M++c/gf1xwR5yUDjM38sb5E+o9MFNep0AdGAQiW500Gydbq5
evU4rWRMMpPHytLYL2SCaO/qYWx5WorvXcTkkc7kgW8cEZOnYlEONgycnSMw8gtt
+iwoSdS3/4SgvspsGCgti+/V6dv23QojfYebCGT3HUoryndVrEB9l9ZSnr+2nsYl
rQm8PtomGg+0BvI6aYOL4r6T75BJiXoueWYpQvPwpsIY66LvvWFLmO+978QYY6Sf
9PZXjBNM2DN3ieMN5OjhYX3gkw2xVybwqnrlT7zMJcbb/zsyHaOq81F4Isrl3tOM
1fxXS0Ud0wrXPKnVXL2Z1gjN3UTr4pcZTIn2F9WWIBc/IN/DL51jNYXpv3h9kA+p
Cpyh8TQcLq+p9CSVD2lzPG2GpyM0hSlsD+ST2wXOLyNbI1TTywzaJPpExJxt5ImI
FnkimsdRw+tpVOkyA9oZFDk2cIqvsYOxpYWtZTdLY9OgcPyS0hmDvqDrg/qZ5yby
fER+uqtBHXPAEHI0cTB9qhycs4gLaXxMyX9RImxfXPRYAC59qDbJpV+vTXLpZ2nX
TS59V3wLIjFRGLckLv0B/fsrGmrecCTXih0Bxl318bVs4C2strj0Ff6oxFTaC/I9
JXlVI1mMMFqwVtV5CqqCDx6ZIu+ZE9pHzUViP0Tv8QWJxtOiXoZU9P9y3Kxoqggj
P12AEeBtAaTpygnjBi79aopLn0Jx6TfXUS59N3wLpopNBUlcevqewuImPw762OyF
yFRg/q4WZJphTUyF2uDSw8UNodqaCuLNkvoSUyFBApceN6tiKtB5yj4VmKRFKGmO
IdQi25hvUVXtKxs/lC0GCQlJ8UKoRSSk2hNCLaIYFINiKscg1CKKQTHyxiDUIopB
MfLGINQiEpK8QqhFJCR5hVCLSEjyCqEWkZDk1ZdFLQarkKjF0Xhq3JxELV4LzrRs
lHFCN1Kw0cv/lHO3Il7ov3Mahfp7d2+dMmj/2pgh61NzJ8SfX+9z6FftcizaucHH
9kaR+RejT8f5lI3MeNApNGdy421DhuwNK3z7Ovd12btjbvu2/vyidevvY9vvzNr2
acrR2UN6dHzz03VT3oNSF8ttWvc9jx461OvH1mNGJ7Tm2n4eUeKTf/mpy/blQc13
TJleYLemdPzSGSObZbqEfOB8N2uBZ8ERl/ZXvP/bFL8k7oqa8VJzwR3zIT0s90YO
suimNz/HIXzThCdZwSP26y7sPc60seDHQ5Hz39kOCz+wyCtyWMql9LBpkxeHNsr7
NexR6Lstl/5oPvFkclZZt6Wdu3y2N/Iuffl2uF2S0YU+cXH9DgWnf3r//Mbxx+2z
11w62CEne1n34yHxWzs9s3Vsve1yH4vsoVm+93es2jY4I77NuIZ6xT6qsXFP5j/V
HDncaVPOLO07U3btPLP1ctGwOwnRuQ8jj9yadjNSa3ADi/Zzf23Tf7SDTq7TiUU/
u5ZMuDvjzrNx+xaeztkX+9+JwBfLl5oM6TwkWMdv8IuJBQVji1MLPt0Ob5BuFLHi
7XmrtS33HxR03Rd0+4p3QOkiL5tgow2XOH7PUrvrJmqkbQ3cOd314NrBgY8PTPr1
AfdKyPv2xuovPBc86XVi2GzHx24nrq5Pvnk274RHg/R+198VDz7RaPHWDo5nfm62
/0e3sE3bOyxJ29Nlc4DD9LY77176t/3Wj11u/tuzo3Ou3w85twebq7V63nlO3wPz
P/fqdvl10ZQJHkusmhgMmei9NMpy+fLFP4yd+DHqw/MOFit/d/335QTfVy8uj7d8
OzvW+vRP3X1fvXk1/4TruE8dlqn9+R2TwdgCH6jwcxGawfgDQjCykABsAI9AlRGM
LQiPxBGMRzFlRzDC73NoBONcKhw0j/F/ZQQjMwpEt06LWVLS69UhGOFXFD9gsiIY
4zhQ2w6VoRxPCqA4zWPAhw5DjlAlpCMY44kadqp4c36SEcF4nNijYZzhnBEIwShV
0lFYIHb1Mn6MwaJeiBbFF0LKri3mXktvi329jJ+asKgXokX3AeLZtcWsWXpb7OuF
raElvV6IFkX/gdi1xZT0tkDs6pVvLNELu7aUcyzBwr7PlXMs0bHs2mJKelsgdvXK
N5Ygln2fK+dYglj2fa5MY4lEI+2gApUPwThXBME47+siGIcyxx9Wj8mDnsgI0oid
ZD1YvUcwelc5IkA1xavVYfLgT8gI0ohhYkbUUwTjcDEjmGs1HREKN0JxI2IEMoJE
MAIUCiEYxUW7Rq8jBKN0Mb0BsYPI7fgqEDmEYJSOYIQPeRGCUblnz86vMnsQglE6
ghG+4PimEIxl6qn82byj+ob4oXI4b52+jcYrfi/ezHqFYGwpBcF4FINO51bqdLgq
+wERGOs+gRG+cEQExopFOUiA1vjyC0Z+n02fBCWJ+vKfENRXmQQIpWXxvTp9277b
YKTvcA+B7L5DaUX5roo9Uy/SWsDT1dXVaKg9jvdMp52GufYA3v90cBcF4r4z3rmK
eQ7LlzhfYdgGjqwERnr7K8YJJuwZIU1RBz9iPYMuEHtlHG6CO3zkIfbKEbxMQ8Yr
iiQwZnPbaK3X7KD9mdtXK1RTQ7uJ+iitYZovCAPErzKYEu0vqi1BNn5AboOXX68p
TDvgewP5kH7G0754fqimMNWg8iFtgr/nGYXnD9MUprA9kE9uFzi/jNoKUE2vMmiT
JBEYyVPPBg7cT2RA5YE6EmsVzEVbC1tbG99OltbWnYhDItwIBWIPW5R0SqrpdQcI
dgBagJLQIrxnoTccYj6XY42FZLlp6h11ScjiIF0SsminWzchi3b4FszFRMlykiCL
9K1SMxf9OK3H+nxpkEW32oMswsggpBJTaS/Id43khYtkMcJowVpVpyKoCt7sMAXx
sNANy0uWoxbm/+W4WdFUEUZ+ugBTYrKcELIYSkEW11OQxVl1FLL4A74F88SmgiTI
ourH4ePNNuU5kmuivFHmL2pBtQlZhOsXQrU1FcSbJfUlpkLCNwhZhLbNEWORbcy3
qKr2lY0fyhaDhISkeCHGIhJS7QkxFlEMikExlWMQYxHFoBh5YxBjEcWgGHljEGMR
CUleIcYiEpK8QoxFJCR5hRiLSEjy6uszFp3ccywbZejq6GWamHM2Xkj9YBuazTXL
3rWrQ3zWooDNtpH7btyKuc33XpGSMvKtyge+UambXUhO6P1xE1f8E95iYb9/UwV9
vLKG7jPq8flE2cfo2UEGZcefdDbopbVx3roeyeWNkhxvRS51aNJ1Sa9pn6xdQx4c
V+nmFcszW1Co1tzDOT/a09EqaVmQweSIq832Z/bOWJ3cfsS9J2c2jIrJWXmx2CbE
/7pFq4OCFJsA87HWTWOuJGKDE10d5vZP2Txg16EOaUWr8217LHTKCZhs2Yzfey/W
ZklKYseEZ/Ez3JMPL93npuGVPsll+Q7s9voOW//q7Nrypp32zl0no4fP3Ptyv9/I
uxn57ttDH1maXc6yXzKrcdFtx3Vl8ff9XHafTQrysykoPOM/+3hC5sd4Z/PYo35D
BsfO2tprwYIWk5Ys6m+X3lln5NiTrbZphPhzQ4NGD0tPat+u8Wnn0l3zdT9kuAVN
nbTce/IeXsmDMHs/szWFN8/mtchaevfd0OD4Ews3/71nerO0/dPf5f5VlvubX1hJ
WEnfmCYlsycmtVQPTsyNdijDOgqeGJS/jOu/1WuYqWHS7S6v18c7bL95z1bvykN+
8pvhmxfcVM117+rhYHLnkl3X17e7XCs2mmD3wYA/t4H5WZttubanWv2xOzfb41bB
2GKnvRp5Pk8Loz0791nz5HJUsnZ+4739Vwx55by4LHm3wf6M4Hm2PUZ9fLP21O7h
9jHzLxp2mpjffcD8vLafzl8vTrneOGKHveOpv5e5WF1oOK6gMMBqqskhTauMwmUu
ZdfMLFamua55+dg3LNo3LLL0uYXvnEOBlx9ePd9jRtz378uxRal/NmMyFlviAxVu
d/MYGzQp3DgkMDiiu7Hb2KCgTt5+/hFBvlHGEb7hEQBfpCGM1p18fAMDMYRhlCIB
2AAegSpjGFsSHjExjCTIJw1TTgxjUYwzh/yACHJga4nRQoXXV9HOrRK9l15E4B2t
F5g9R3i3I/0CfVJgnhzqs8CjqlQMP36scBCpetFOCscdZND2io6/+i7muCOPkS+i
6VQ47qoZnEiUxMcdGmNVi93xDjkoXbSTXGP4PZbQVuG1jZrxUEwxXhYJhLhqC0yI
q96ICa+5NjH+r4yrZkZJErOkJAlx1bSEuOru+NIDkxVXfYLYo5GcnzmjKsGmqRLF
0wQVWSBBNGOdxIOdJGoYzRnDGSsjrvoUUcM4jg9nvEJw1dVJtKSoIKb2akK4alLS
22JfL+PXtyzqhWjRfYB4dm0xa5beFvt6YWtoSa8XokUxySB2bTElvS0Qu3rlG0v0
wq4t5RxLsLDvc+UcS3Qsu7aYkt4WiF298o0liGXf58o5liCWfZ8r01giMZIjKVuV
D1e9UQRXvenr4qp/Zo4/rB5TmkchI0gjRlfeZvySO3EfKJuYDuJMXubUEb3Yhhg2
FpASNwIkxQgpU6MSgZWKFJNkI8ZUOSJANUXR1mFK81hkBGnEODEj6imu2kfMCOZa
TUeEwo1Q3IgYj4wgcdVASoHdBCkKV92WwlX3Q7hqTLgfksTEOM3VITFOe3RIjNNK
nbqJceqOb8FGTJRdIwnjRIq6fE+IFAC7htxTSTqNrag1jBPcEUdIJabSXkDrNWbX
QKGqNhuqgg5mivxWXWifvOwaamH+X36aNJwOo/LTBRjJqYE0XdnYNUKMk7kOiXEa
qENinLrq1E2MUw98CzaJTQVJGCdCAk8BkRZPE5kKzB/tgFr8o11rGKcu9Iu1NRXE
myX1JaZCggSME25WxVSg8+rGVPiWHmIgXIctobcQ/CUx7CM5Xx7DziOuVABzD1cq
dRtzL83f0V/BXxUsU7251jaekXaZek+tWby3Wg00vLR8eXn4FK8gntcAim3JwUzJ
FhQpUX9ryiKlX6NZpHMozH1VxPM0TDLxnLi9TnbiuaJh2PAEkIP8KF6CvrFGFt+T
N1PfTqOQ78Abry8kntekc61V62Ln5mLVPwEEvjcnGLExVDZWO08AqSlXtua9e0Gt
VCeVG65XoNZcdw3XXU+Fa607ndtNT/bevYBvSDheHtJSfFdTucIU8gvwfHcqba6L
YWu4whTyVfAU2ofUGs+fzkghv6renacqa++6UlOXXy556sI9DZJ6d5jS9y56WoH0
pxXA/SboaQUVi3JQ86GLYIu7Y1W/0wBVvBPCyDorU/OhtCy+V6dv23d4mwhbDLeQ
ye47lK593xH0VuaYb1FV7SsbP5QtBgkJSfFC0FskpNoTgt6iGBSDYirHIOgtikEx
8sYg6C2KQTHyxiDoLRKSvELQWyQkeYWgt0hI8gpBb5GQ5NWXhd66qZDQWwc8Hd+U
hN7+PDBHwM+I7fUB65PgseTtn1hTweFp/X80aN0uIMs4xb7PwMPpDW8b7veefKa1
nWqDkTsLZtzUfsNz6N19bco/y0/Y8ee9e9p3SenZDxvjPl1bMflY6c2SUQ176d3m
mU15Nkb/vUbJgG3X5kxw4k0dNIfb5e2pOdouf8xrpBKpp2vm9zo6ZNOGfjuOO3/3
8+JlXZ8uzv8xO3ZyUah+3JZf/gof/8bw1m/3zVrYtMrpF2A+9oaW4LM350wTtxNz
+5R8Cjs2TD/oRVbo8H8MTvkkdzXS6+88Fmt9vrvn48yIq//p7yrUDsz8pdPzGS5X
J3FO9vFuGbt1g/3+8McuvWd5654M+TzFbuUCt7vdRt2e2fn0zPxZz3o/X5bqm/3f
gW5ao6/fGxcfOWFofKpVxNC9F/ssXLLAaFqjRi11lzVcazoWO9AvJC5q1KKWvW/z
Co7dtY5x8B5g/nFx4e5fdNVHD79XeKtZ55YL+SUJG3Wb6727HJhb8CyvUcH5wKIC
jl2Dudf6/WR8NT5nqdf2FY5nhjR7wWv6w8D/Ne6T6x0/MLnl/RaNNnaa/b6R2b6r
s+4sSvtfpFfGYHO1U7dG6ywP0i9PMHwUNXnTpQGHVrQ7N/Su57gi93EG4yZsWvbi
4bjf7QPjvs9PIdCzUVFd3OKe/tTT9/CnGWPHxT0s73jrdHtPE68T7Q/k/pyrOmWP
l0PiFs9r+7ptnu4Y7u2uEZyYO7dnF2zkgtP9Pv+3qv9Kr2Grpjv9Z7Drcd+HxsON
Yn4NOp5jO/36tbWLz63sO8F6Raf8/ZcnvB02wc7qs3Ye7+kiJtK2FT4M4dY/mlhr
SxBrwzGErJUiAdgAHoEqI2tbER4xkbXkXY/pmHIia4UoNtgLGsW2jQoHbWf8XxnF
xowC0a3TYpaU9LoQxUYfMoUoNoCfOWCyoti6cqC2ESoTOBMpkNqqq+krjPV3UiUq
SmJXr4CE6zrUT9+7ETWMVPHnBMiIYjtL7NEkTiBnskJQbDqi44Qh0ZKigpja2yaE
YiMlvS329dK/PwdJrxeiRfcB4tm1xaxZelvs64WtoSW9XogWRYCB2LXFlPS2QOzq
lW8s0Qu7tpRzLMHCvs+VcyzRsezaYkp6WyB29co3liCWfZ8r51iCWPZ9rkxjiUSk
jKAClQ/Ftk0Exbb966LYJjDHH1aPCWQTkREUxZCsBxNeckc9M7Hi/e5KTAdx3hQ5
deLjQJfo6VahOoxi869yRIBqilmqwwSyAGQEacQkMSPqKYotUMwI5lpNR4TCjVDc
iJiMjCBRbK3whfhhM6Y4FJsFhWLzQCg2TLgfkvQtQneE38zAlsAaufcCJxIKM0Ll
a0BhPqpv4UfxVugba5zhe/IC9O00svkOPA99DLORgT1go6pmSjWhQIn6Ky835IoU
bgh8yEuQJSCAUO1wQxQNHeBh9hRSaUydRypJmz0jv8rsiVW7r7WQu5h/XE1V24fr
y89UM9R24brB0YlD+TumBv5ysDGx+IYsxstDeh8/tSzkClPIP47n+1KpKn5e9uEK
U8jPxPOhfUgN8XwXrjCFfHF/5eWyGFFcFtNyyVwW+IKDg7XAsBi6ZEdYw/oGTgkO
8w338Q3y8TX2D4rwDQr3j4gyNnWy8LQwk31SKR7XUqSeyl/IO6rfED9U+vDW6Ztr
vOK78GbqMzpdUKNOFxANKFSSOx0kW6e3VK+eo5WOSYbxkN/8ivauHsYWpKX43kUw
HukwHvjGEcF4KhblgMLgswdLwMgvtOmzoCRR3/4TgvoqQ2GgtCy+V6dv2/duGOk7
3EQgu+9QWlG+q2IF6m+15vCG6uhpGGmP4lnqmGjYavflNdPBXRSI+860VdRzYmYJ
GAEKUyTeVBhjXfS9N2wJ8733nRhjjNx2evsrxgkm7Jm7xPEGcvTwI5YldIHYK6Nw
E36CzzzEXknFyxgxXrkj0zGqwkcJEp6I7nI7a63T7KL9iTtEK0RTX7ux+iStnzTf
EQaIX2YwJdpfVFuCu/gBuTNefp2mMO2C7w3kQ/oJT4fg+SGawlSfyoe0MX4Gn4Tn
/6QpTGF7IJ/cLtiqZdRWgGp6mUGbRJ+ImLONPBHRIk9EkRy4vcig0mUGvoYNihwb
OMXX2MHYzqJbV1vfTpbWNp2IyapaUR1Uzzw1kacj8sNdDeqQA1cs5MdFFtQHO6q1
cB0ibFNcdPcDgz6KYtBvphj08+sog94e34JtmCh4WxKDnr536taexZ3fxD51rJ5B
X+Z2C6stBj2cPAmpxFTaC3KUkBcykkWECd9tgpjHIFFBVa1E8sjb5IT2yQvephbm
/+W4WdFUEUZ+ugBTevA2MOhDtUkG/XptkkE/S7tuMugd8C3YLjYVJDHo71qrvd50
76ojuVYsMhWYv6EFmWZYE1OhNhj0cD1DqLamgnizpL7EVEiQwKDHzaqYCnSesk8F
JlURSppjCKvINuZbVFX7ysYPZYtBQkJSvBBWEQmp9oSwiigGxaCYyjEIq4hiUIy8
MQiriGJQjLwxCKuIhCSvEFYRCUleIawiEpK8QlhFJCR59WWxisEqJFZxNJ4aNyex
ik7uOZaNMnR19DJNzDkbL6R+sA3N5ppl79rVIT5rUcBm28h9N27F3OZ7r0hJGflW
5QPfqNTNLiQn9P64iSv+CW+xsN+/qYI+XllD9xn1+Hyi7GP07CCDsuNPOhv00to4
b12P5PJGSY63Ipc6NOm6pNe0T9auIQ+Oq3TziuWZLShUa+7hnB/t6WiVtCzIYHLE
1Wb7M3tnrE5uP+LekzMbRsXkrLxYbBPif92i1UFBik2A+VjrpjFXErHBia4Oc/un
bB6w61CHtKLV+bY9FjrlBEy2bMbvvRdrsyQlsWPCs/gZ7smHl+5z0/BKn+SyfAd2
e32HrX91dm150057566T0cNn7n2532/k3Yx89+2hjyzNLmfZL5nVuOi247qy+Pt+
LrvPJgX52RQUnvGffTwh82O8s3nsUb8hg2Nnbe21YEGLSUsW9bdL76wzcuzJVts0
Qvy5oUGjh6UntW/X+LRz6a75uh8y3IKmTlruPXkPr+RBmL2f2ZrCm2fzWmQtvftu
aHD8iYWb/94zvVna/unvcv8qy/3NL6wkrKRvTJOS2ROTWqoHJ+ZGO5RhHQVPDMpf
xvXf6jXM1DDpdpfX6+Mdtt+8Z6t35SE/+c3wzQtuqua6d/VwMLlzya7r69tdrhUb
TbD7YMCf28D8rM22XNtTrf7YnZvtcatgbLHTXo08n6eF0Z6d+6x5cjkqWTu/8d7+
K4a8cl5clrzbYH9G8DzbHqM+vll7avdw+5j5Fw07TczvPmB+XttP568Xp1xvHLHD
3vHU38tcrC40HFdQGGA11eSQplVG4TKXsmtmFivTXNe8fEwAHSNLn1v4zjkUePnh
1fM9ZsR9/74cW5T6ZzMmeNEYH6hWGPX4euOQwOCI7sZuY4OCOnn7+UcE+UYZR/iG
RwCREZEZaygB2AAegSqTGY0Jj8TJjOcw5SQzFsU4c8hPiCAHhg0xXKjw+irauVWi
d9eLCLyj9QKz5wjvd6RfoM8KzLNDfRZ4VJWK4feQFQ4iVS/aSeG4gwzaXtHxV9/F
HHfkMfJFNJ0Kx101gxOJkvi4Q2OsarE73iEHpYt2kmsMPyYT2iq8tlEzHoopxssi
gZBgbY0JCdZ7GTH7GP9XJlgzo0D0VRotZklJr1dHsO6JL46YrATr80RtQZxgTkgl
/jRVYsxUQUUWoSjGOkkMu0DUEMoJ44TLSLDOIGqI4EzhRCqEYF2dREuKCmJqryZE
sCYlvS329TJ+j8uiXogW3QdyhrJpi1mz9LbY1wtbQ0t6vRAtSk4GsWuLKeltgdjV
K99Yohd2bSnnWIKFfZ8r51iiY9m1xZT0tkDs6pVvLEEs+z5XzrEEsez7XJnGEkmW
DKJsVT6C9V4RgvW+r0uwDmaOP6weg5tDkBGkEaEi2xxFYXpvEtNBHNPLnDqiF9sQ
w8YCUuJGgKQYIWVqVIKyUpFikmxEWJUjAlRTOm0dBjeHIyNIIyLEjKinBOspYkYw
12o6IhRuhOJGBGCimKqHRpAEa2NMeMmpKIJ1W4pg3Q8RrDHhfkgSE+T0SZsEObWm
QE6adRTk1BPfgr2YKL1GEsiJFHX5nhchqB7kdAVLqzWQE0C+CKnEVNoLaF0mek1V
mw1VGYvkkd+qC+2Tl15DLcz/y3GziJQKo/LTBZgS02uEIKf5FMhpLwVyWl1HQU6O
+BbsE5sKkkBOhGIGC4h0zFSRqcD81Q7I6I5mrYGcfqBfrK2pIN4sqS8xFRIkgJxw
syqmAp1XN6ZCfXquQRDny5PZecSVCpDv4Url2ybfh34Ff1WwTPXmWtt4Rtpl6j21
ZvHeajXQ8NLy5eXhU7wCgl4DTLYlBzMlW1CkRP2tKZ2Ufo2mk86hyPdVQdDPYfBO
Gz86xtAlOxLHSuL2OtkZ6IrGY8NDQQ7yo3gJ+sYaWXxP3kx9O41CvgNvvL6QgV6T
zrVWrYudm4tV/1AQ+N5cEuFe3oeCyEOWZde7F9RKdVK54XoFas1113Dd9VS41rrT
ud30ZO/dC/iGhOPlIS3FdzWVK0whvwDPd6fS5roYtoYrTCFfBU+hfUit8fzpjBTy
q+rdeaqy9q4rNXX55ZKnLtzTIKl3hyl976LnF0h/fgHcb4KeX1CxKAdHH5bfMPJ2
pqreaYAq3glhZJ2VOfpQWhbfq9O37Tu8TQTfHTF5fIfSte87E3sL22aOqLdsY75F
VbWvbPxQthgkJCTFC1FvkZBqT4h6i2JQDIqpHIOotygGxcgbg6i3KAbFyBuDqLdI
SPIKUW+RkOQVot4iIckrRL1FQpJXX5Z666VCUm/74unOpiT19vTAHAF/wcJeHdbP
EQwSdCpWaTz1+8TYefyhi3/T3zvUrs/Aw+ldLxju91715rvpDzl2b6yOhu7f1/JD
w1kLLDem/LP8hJ3tbxbrljfaPzXt/pVCxx4r1l/e+9yBG/O6cYzHxjcTXr7/ecqe
67ucTqQfy+nwYI7W7K0Plh/rH9NL4JiPca9+dvnbIPJZhMG6zPMX/Zcb/bDC+Of/
jW+Zv/q5ZpoDd677qV4fvZ6teh+WtiepocV+rPgnLq/fs4Dvmnoeufzovd7UHhkr
Mv1aveu048jsUw302xnwzLKzd/XsX3ZvxKDLPVf7dD8UNSvY7PiveS7fXfb5t23j
DM++s8Y+fdF5wU83Tupn74r+p6dBtm/6TtOpj1PuPSmePfn4m5MvF9v26f5fK+3L
V7Wvnuj4eqOm5+MpPE8L69w2aSbTW57W0jW50NBpaMi80X1C4qaPWtTy3136WZOO
T8B6JPHnfWh711PV8M3A5leMbm04YD+wdcED365+fmvOX0q7mXnaKmvp3Xs3e4c0
b/9B4/DpgsZHDPav6z5q/h7L3NUjH9r1iW06zNu/+40ZHyMGB6a+fTZk528mr0Pb
/uuVM6x5X80nhRemWdlOO/dxQZDnk/VjTRLPdf+VP8TTe/GxLkvcFsWFWp88/WjQ
jDtd+z+elPPwRcql8+dvh2Y7Z7zyX5uy9Vq/1P6fT53v/jYh+9y+srybx/+akdAy
a9/Em38UDCu5MOTFjKKCZ3lb95W5R3fhb8q41LLHB8H8fpH+q6Y7/TfH4/WURsbD
jRJ+Dfrj5259r19bu3hddPe4S3ZHlh0xH/Gg/PCZxe+67HB6+44Jt22Nj0e4fZBm
19r5hUzAELhWigRgA3gEqgyubU14JA6uvYgpJ7hWCGSDSwIayHaQCgcdYvxfGcjG
jALRrdNilpT0enVANgG+OGGyAtl+5UBt21SmcaIonFqLy8MXXnh/nSpRURK7egUk
XNehfgAfS9SwXWUGZ6aMQLa/iD2axZnNiVYIkE1HdJwwJFpSVBBTe9uEgGykpLfF
vl76V+gg6fVCtOg+QDy7tpg1S2+Lfb2wNbSk1wvRoiAwELu2mJLeFohdvfKNJXph
15ZyjiVY2Pe5co4lOpZdW0xJbwvErl75xhLEsu9z5RxLEMu+z5VpLJGglG1UoPIB
2Q6KANkOfV0g2zTm+MPqMYcsChlBGrGdrAcTXnJHPTOx4v3uSkwHceoUOXXi40CX
6OlWoToMZJtR5YgA1RS2VIc5ZDOREaQRs8SMqKdAttliRjDXajoiFG6E4kZENDKC
BLK1xhfi582Y4oBsFhSQzQMB2TDhfkhSfUTvbFP5GmiYj+pb+FG8FfrGGmf4nrwA
fTuNbL4Dz0Mfw2xkIBDYqKqZUk0oUKL+yksPuSKFHgIf8hJ8CQggVDv0EEWjB3iY
PQVWGvPNg5W2f5XZE6t2X2shdzH/uJqqtg/Xl5+pZqjtwnWDoxOH8ndMDfzlYGNi
8Q1ZjJeH9D5+alnIFaaQfxzP96VSVfy87MMVppCfiedD+5Aa4vkuXGEK+eL+yktn
MaLoLKblkuks8AUHB2uBYTF0yY6whvUNnBIc5hvu4xvk42vsHxThGxTuHxFlbOpk
4WlhJvukUjy0pUw9lT+bd1TfED9UDuet07fReMXvxZupz+h0QY06XUA0oFBJ7nSQ
bJ3eUr16mtZFTDJNy87YL2SCaOfqYWxpWorvXETkkU7kgS8cEZGnYlEOMkx3fEnC
FwEmDxlGgCmCDPMt+94DI313wuTxHUoryndV/Ix1U2sxr5GuocY7LV9esY6Nhr62
G++ODu6iQNx3PUYdop7D8iXOVxi2Hm8qjLEu+tYbtoT51vtOjDFG+klvf8U4wYQ9
c5c43kCOIX7EKoYuEHvFFzdhHHzkIfZKOl7mHePd/x2ZjlEVPkqQ8ESUz9XU2qLZ
UFtDvZPWdM0irVbqfbTGad4iWhe/ymBKtL+otgT5+AFZEy+/RVOYNsT3E/Ih1cDf
03TC86drCtMiLTIf0lZ42gdPx2kKU9geyCe3C5xfRm0FqKZXGbRJ9ImIOdvIU896
DtxPZEDlgToSa4MixwZO8TV2MP7B4gc7S99Olta2nTB48iPcCAVinobIUw/5Oa4G
dXiB93PkJ0OSTkk1ve4AQY3QApSEFuE9C73hEPO5HGtMdzeA5wW6JHh+vC4JnnfV
rZvgeQG+BQcxUdq2JPA8favUX6O2H7ummu8ItO2qD6Flbrew2gLPw8mSkEpMpb0g
3zWSFy6SxQijBWtVnYqgqtYieRAPC90wDAyYPrAfojfxgkTjaVEvQyr6fzluVjRV
hJGfLsAIsrYA0nTlpG0DeD6UAs+vp8Dzs+ooeN4J34JDYlNBEni+oWv3wEFL8xzJ
tWKRqcD84SzINMOamAq1AZ6H6xdCtTUVxJsl9SWmQoIE8DxuVsVUoPOUfSoglKLM
Md+iqtpXNn4oWwwSEpLihVCKSEi1J4RSRDEoBsVUjkEoRRSDYuSNQShFFINi5I1B
KEUkJHmFUIpISPIKoRSRkOQVQikiIcmrL4tSDFYhUYqj8dS4OYlSdHLPsWyUoauj
l2liztl4IfWDbWg21yx7164O8VmLAjbbRu67cSvmNt97RUrKyLcqH/hGpW52ITmh
98dNXPFPeIuF/f5NFfTxyhq6z6jH5xNlH6NnBxmUHX/S2aCX1sZ563oklzdKcrwV
udShSdclvaZ9snYNeXBcpZtXLM9sQaFacw/n/GhPR6ukZUEGkyOuNtuf2TtjdXL7
EfeenNkwKiZn5cVimxD/6xatDgpSbALMx1o3jbmSiA1OdHWY2z9l84BdhzqkFa3O
t+2x0CknYLJlM37vvVibJSmJHROexc9wTz68dJ+bhlf6JJflO7Db6zts/auza8ub
dto7d52MHj5z78v9fiPvZuS7bw99ZGl2Oct+yazGRbcd15XF3/dz2X02KcjPpqDw
jP/s4wmZH+OdzWOP+g0ZHDtra68FC1pMWrKov116Z52RY0+22qYR4s8NDRo9LD2p
fbvGp51Ld83X/ZDhFjR10nLvyXt4JQ/C7P3M1hTePJvXImvp3XdDg+NPLNz8957p
zdL2T3+X+1dZ7m9+YSVhJX1jmpTMnpjUUj04MTfaoQzrKHhiUP4yrv9Wr2Gmhkm3
u7xeH++w/eY9W70rD/nJb4ZvXnBTNde9q4eDyZ1Ldl1f3+5yrdhogt0HA/7cBuZn
bbbl2p5q9cfu3GyPWwVji532auT5PC2M9uzcZ82Ty1HJ2vmN9/ZfMeSV8+Ky5N0G
+zOC59n2GPXxzdpTu4fbx8y/aNhpYn73AfPz2n46f7045XrjiB32jqf+XuZidaHh
uILCAKupJoc0rTIKl7mUXTOzWJnmuublY9+waN+wyNLnFr5zDgVefnj1fI8Zcd+/
L8cWpf7ZjMlYbIMPVAuMemS9cUhgcER3Y7exQUGdvP38I4J8o4wjfMMjAL6IIIw1
kQBsAI9AlSGMbQiPxCGMVzDlhDAWxThzyI+HIAfGDDFWqPD6Ktq5VaJ30osIvKP1
ArPnCO91pF+gTwnMU0N9FnhUlYrhp48VDiJVL9pJ4biDDNpe0fFX38Ucd+Qx8kU0
nQrHXTWDE4mS+LhDY6xqsTveIQeli3aSawy/xhLaKry2UTMeiinGyyKBEFbdFRPC
qlMZMUcY/1eGVTOjQPRVGi1mSUmvVwer7oUvvTFZYdVXidpiOL9w5lRCTVMlxngK
KrIIiaOm/yZqmMuZx5kvI6z6GlHDAs5CziKFwKqrk2hJUUFM7dWEYNWkpLfFvl7G
r3JZ1AvRovsA8ezaYtYsvS329cLW0JJeL0SLQpJB7NpiSnpbIHb1yjeW6IVdW8o5
lmBh3+fKOZboWHZtMSW9LRC7euUbSxDLvs+VcyxBLPs+V6axREIkYyhblQ9WnSoC
qz7ydWHVvzDHH1aPGc1zkBGkEXPFjKieyMucOraCin8p1WFY9TwxI5hrNQXR1mFG
83xkBGnEAjEjqp8a1Rsh3zECJMWImkwNUQNoSTZioZgRzLWajgiFG6G4EbEIGUHC
qqFi2E2QomDVbSlYdT8Eq8aE+yFJTIjTHxTE6TYFcTpVRyFOvfAtSMVEyTWSIE6k
qMv3mH6C6iFOSdgvtQZxqvj4USWm0l6QX+1U9xEeI4xWdZ/LQ1WiM538Vl1on7zk
Gmph/l+Om0WkVBiVny7AlJhcI4Q4PaIgTpo6JMTpZR2FOPXGt+CI2FSQBHEi1VtA
JGM8RaYC8yc7IIN1TWsN4uRAv1hbU0G8WVJfYiokSIA44WZVTAU6r25Mhfr0CIMY
zpeHsPOIKxWA3MOVyrcNuZ/7FfxVwTLVm2tt4xlpl6n31JrFe6vVQMNLy5eXh0/x
Ct55DZDYlhzMlGxBkRL1t6YkUvo1mkQ6h4LcV8U7v4JJ5p0Tt9fJzjtXNAobnv9x
kB/FS9A31sjie/Jm6ttpFPIdeOP1hbzzmnSutWpd7NxcrPrnf8D35gQhNobKxmrn
+R81pcrWvHcvqJXqpHLD9QrUmuuu4brrqXCtdadzu+nJ3rsX8A0Jx8tDWorvaipX
mEJ+AZ7vTqXNdTFsDVeYQr4KnkL7kFrj+dMZKeRX1bvzVGXtXVdq6vLLJU9duKdB
Uu8OU/reRc8qkP6sArjfBD2roGJRDmY+vHNPwcjbmap6pwGqeCeEkXVWZuZDaVl8
r07ftu/wNhF8743J4zuUrn3fEfJW5phvUVXtKxs/lC0GCQlJ8ULIWySk2hNC3qIY
FINiKscg5C2KQTHyxiDkLYpBMfLGIOQtEpK8QshbJCR5hZC3SEjyCiFvkZDk1ZdF
3g5VIZG3zni6symJvD09MEfAX7DwRqlgxC/Njbcndx4UemB8yRr+nFWLFsUPSN5z
sX+TOxdK+j5v/P29o+EPOXZv7sU+bfGyjX3vDVeziy7kdrflqf7Xd8mtHrnBE0q3
tsgY8N/1ki2c9GH6CTfazfWedsLzfscS/+sdQ4v0zI8mLLj/ZJrP7CYJja77GCXs
vHvgof3Y2IGOMWHDF23qevFkPu9G08mPrVoe23I6x33sm+9uLbq/t3Dw6BUNsjzP
7GqMffbmnBn85/ALfUpKAlKOXfon95f85D8/zM54OtnOqJfzJbVeSyJT97rfcCjT
X3fY/eGGgYFO90dcTmp31LR3lGuhR+igiVlNF3zu2eXcmtKU6xafnpfGbvtZ3XVJ
2KRRf81q+aJbV/Me+4N3drrhP/qkV9AovyLfuPvXfrM+NXfQI+v8FmcMx+Xp/37d
b1xHfWduv2nt5iRmve4V0aDz8oRROUfUDz7RcjrquPrnLgdP581YGne2+ev1GWbO
DmlX1HXdPDZcHeHQYlOvExuu/uyg9iTk1aPEwIMTrv7Xp8OuFafODGn24keLsE2H
//rr9wO2m586zP7TtOuIj2/MPIZufHdUP3THfx2X75gXXpoxzcp2+rmPC4KGPvnX
bq3nuBYui/buSzw3cus5k3NX7L5zfDD+d4fAjd+/TpkcNnVy2OzPPvFd/3doZvbO
EK9Nd0zelTd5nrcjwCAxd4f3i64vfpk+KHGL57V9E29uHHhi6b2bmadPeb4YFd2F
PzL9UvvIN3FaKwMzjUvmZGvserzRVJBsJ+j0T+QR/2UJW9sbmJVHWK8NDfou2DP1
TPn4+QavJ12683Ysk2vbFh+N8AvFCmxtJx/fwEAMgWulSAA2gEegyuDatoRH4uDa
65hygmuFQDa4j40GsqVR4aATjP8rA9mYUSC6dVrMkpJerw7I5owvfTBZgWzdOVDb
aJUlnKUUTi3A3/9K6aHuVImKktjVKyDhug71A/geRA1jVJZzVsgIZMsk9mglZxVn
tUKAbDqi44Qh0ZKigpja2yYEZCMlvS329dK/QgdJrxeiRfcB4tm1xaxZelvs64Wt
oSW9XogWBYGB2LXFlPS2QOzqlW8s0Qu7tpRzLMHCvs+VcyzRsezaYkp6WyB29co3
liCWfZ8r51iCWPZ9rkxjiQSlwLNHQMoHZEsTAbKd+LpAtiXM8YfVYw7ZUmQEacQY
sh5MeMkd9czEive7KzEdxKlT5NSJjwNdoqdbheowkG15lSMCVFPYUh3mkK1ARpBG
rBQzop4C2VaJGcFcq+mIULgRihsRq5ERJJCtLb4QP2/GFAdks6CAbB4IyIYJ90OS
6iN6Z7TK10DDfFTfwo/irdA31jjD9+QF6NtpZPMdeB76GGYjA4HARlXNlGpCgRL1
V156yBUp9BD4kJfgS0AAodqhhygaPcDD7Cmw0phvHqw05qvMnli1+1oLuYv5x9VU
tX24vvxMNUNtF64bHJ04lL9jauAvBxsTi2/IYrw8pPfxU8tCrjCF/ON4vi+VquLn
ZR+uMIX8TDwf2ofUEM934QpTyBf3V146ixFFZzEtl0xngS84OFgLDIuhS3aENaxv
4JTgMN9wH98gH19j/6AI36Bw/4goY1MnC08LM9knleKhLUXqqfyFvKP6DfFDpQ9v
[truncated: 45,930 more chars]
