# Supplementary material for: Par protein localization during the early development of Mnemiopsis leidyi suggests different modes of epithelial organization in the metazoa
Source: eLife journal article supplement (doi:10.7554/elife.54927), 2020-07-27
Supplement: fig3-figsupp5-data2 [file elife-54927-fig3-figsupp5-data2-v3.pzfx]

<?xml version="1.0" encoding="UTF-8"?><GraphPadPrismFile PrismXMLVersion="5.00">
<Created>
<OriginalVersion CreatedByProgram="GraphPad Prism" CreatedByVersion="8.4.0.455" Login="root" DateTime="2020-07-05T19:23:08+01:00"></OriginalVersion>
<MostRecentVersion CreatedByProgram="GraphPad Prism" CreatedByVersion="8.4.0.455" Login="root" DateTime="2020-07-06T11:55:16+01:00"></MostRecentVersion>
</Created>
<InfoSequence>
<Ref ID="Info0" Selected="1"></Ref>
</InfoSequence>
<Info ID="Info0">
<Title>Project info 1</Title>
<Notes></Notes>
<Constant><Name>Experiment Date</Name><Value>2020-07-05</Value></Constant>
<Constant><Name>Experiment ID</Name><Value></Value></Constant>
<Constant><Name>Notebook ID</Name><Value></Value></Constant>
<Constant><Name>Project</Name><Value></Value></Constant>
<Constant><Name>Experimenter</Name><Value></Value></Constant>
<Constant><Name>Protocol</Name><Value></Value></Constant>
</Info>

<TableSequence>

<Ref ID="Table0"></Ref>
<Ref ID="Table6"></Ref>
<Ref ID="Table1"></Ref>
<Ref ID="Table2"></Ref>
<Ref ID="Table10"></Ref>
<Ref ID="Table11"></Ref>
<Ref ID="Table15"></Ref>
<Ref ID="Table16" Selected="1"></Ref>
</TableSequence>
<Table ID="Table0" XFormat="numbers" YFormat="replicates" Replicates="1" TableType="XY" EVFormat="AsteriskAfterNumber">
<Title>4-cell</Title>
<RowTitlesColumn Width="84">
<Subcolumn></Subcolumn>
</RowTitlesColumn>
<XColumn Width="51" Subcolumns="1" Decimals="3">
<Title></Title>
<Subcolumn>
<d>0</d>
<d>0</d>
<d>0.003</d>
<d>0.003</d>
<d>0.005</d>
<d>0.006</d>
<d>0.008</d>
<d>0.008</d>
<d>0.011</d>
<d>0.011</d>
<d>0.013</d>
<d>0.014</d>
<d>0.016</d>
<d>0.017</d>
<d>0.018</d>
<d>0.02</d>
<d>0.021</d>
<d>0.023</d>
<d>0.024</d>
<d>0.025</d>
<d>0.026</d>
<d>0.028</d>
<d>0.029</d>
<d>0.031</d>
<d>0.032</d>
<d>0.034</d>
<d>0.034</d>
<d>0.037</d>
<d>0.037</d>
<d>0.039</d>
<d>0.04</d>
<d>0.042</d>
<d>0.042</d>
<d>0.045</d>
<d>0.045</d>
<d>0.047</d>
<d>0.048</d>
<d>0.05</d>
<d>0.051</d>
<d>0.053</d>
<d>0.054</d>
<d>0.055</d>
<d>0.057</d>
<d>0.058</d>
<d>0.059</d>
<d>0.061</d>
<d>0.062</d>
<d>0.063</d>
<d>0.065</d>
<d>0.066</d>
<d>0.068</d>
<d>0.068</d>
<d>0.071</d>
<d>0.071</d>
<d>0.074</d>
<d>0.074</d>
<d>0.076</d>
<d>0.076</d>
<d>0.079</d>
<d>0.079</d>
<d>0.082</d>
<d>0.082</d>
<d>0.084</d>
<d>0.085</d>
<d>0.087</d>
<d>0.088</d>
<d>0.089</d>
<d>0.091</d>
<d>0.092</d>
<d>0.093</d>
<d>0.095</d>
<d>0.096</d>
<d>0.097</d>
<d>0.099</d>
<d>0.1</d>
<d>0.102</d>
<d>0.103</d>
<d>0.105</d>
<d>0.105</d>
<d>0.108</d>
<d>0.108</d>
<d>0.11</d>
<d>0.111</d>
<d>0.113</d>
<d>0.113</d>
<d>0.116</d>
<d>0.116</d>
<d>0.118</d>
<d>0.119</d>
<d>0.121</d>
<d>0.122</d>
<d>0.124</d>
<d>0.125</d>
<d>0.126</d>
<d>0.127</d>
<d>0.129</d>
<d>0.13</d>
<d>0.132</d>
<d>0.133</d>
<d>0.134</d>
<d>0.136</d>
<d>0.137</d>
<d>0.139</d>
<d>0.139</d>
<d>0.142</d>
<d>0.142</d>
<d>0.144</d>
<d>0.145</d>
<d>0.147</d>
<d>0.147</d>
<d>0.15</d>
<d>0.15</d>
<d>0.153</d>
<d>0.153</d>
<d>0.155</d>
<d>0.156</d>
<d>0.158</d>
<d>0.159</d>
<d>0.161</d>
<d>0.161</d>
<d>0.163</d>
<d>0.164</d>
<d>0.166</d>
<d>0.167</d>
<d>0.168</d>
<d>0.17</d>
<d>0.171</d>
<d>0.173</d>
<d>0.174</d>
<d>0.176</d>
<d>0.176</d>
<d>0.178</d>
<d>0.179</d>
<d>0.181</d>
<d>0.182</d>
<d>0.184</d>
<d>0.184</d>
<d>0.187</d>
<d>0.187</d>
<d>0.189</d>
<d>0.19</d>
<d>0.192</d>
<d>0.193</d>
<d>0.195</d>
<d>0.195</d>
<d>0.197</d>
<d>0.198</d>
<d>0.2</d>
<d>0.201</d>
<d>0.203</d>
<d>0.204</d>
<d>0.205</d>
<d>0.207</d>
<d>0.208</d>
<d>0.21</d>
<d>0.211</d>
<d>0.212</d>
<d>0.213</d>
<d>0.215</d>
<d>0.216</d>
<d>0.218</d>
<d>0.218</d>
<d>0.221</d>
<d>0.221</d>
<d>0.224</d>
<d>0.224</d>
<d>0.226</d>
<d>0.227</d>
<d>0.229</d>
<d>0.229</d>
<d>0.232</d>
<d>0.232</d>
<d>0.234</d>
<d>0.235</d>
<d>0.237</d>
<d>0.238</d>
<d>0.239</d>
<d>0.241</d>
<d>0.242</d>
<d>0.244</d>
<d>0.245</d>
<d>0.246</d>
<d>0.247</d>
<d>0.249</d>
<d>0.25</d>
<d>0.252</d>
<d>0.253</d>
<d>0.255</d>
<d>0.255</d>
<d>0.258</d>
<d>0.258</d>
<d>0.261</d>
<d>0.261</d>
<d>0.263</d>
<d>0.263</d>
<d>0.266</d>
<d>0.266</d>
<d>0.268</d>
<d>0.269</d>
<d>0.271</d>
<d>0.272</d>
<d>0.274</d>
<d>0.275</d>
<d>0.276</d>
<d>0.278</d>
<d>0.279</d>
<d>0.28</d>
<d>0.282</d>
<d>0.283</d>
<d>0.284</d>
<d>0.286</d>
<d>0.287</d>
<d>0.289</d>
<d>0.289</d>
<d>0.292</d>
<d>0.292</d>
<d>0.295</d>
<d>0.295</d>
<d>0.297</d>
<d>0.297</d>
<d>0.3</d>
<d>0.3</d>
<d>0.303</d>
<d>0.303</d>
<d>0.305</d>
<d>0.306</d>
<d>0.308</d>
<d>0.309</d>
<d>0.311</d>
<d>0.312</d>
<d>0.313</d>
<d>0.314</d>
<d>0.316</d>
<d>0.317</d>
<d>0.318</d>
<d>0.32</d>
<d>0.321</d>
<d>0.323</d>
<d>0.324</d>
<d>0.326</d>
<d>0.326</d>
<d>0.329</d>
<d>0.329</d>
<d>0.331</d>
<d>0.332</d>
<d>0.334</d>
<d>0.334</d>
<d>0.337</d>
<d>0.337</d>
<d>0.339</d>
<d>0.34</d>
<d>0.342</d>
<d>0.343</d>
<d>0.345</d>
<d>0.346</d>
<d>0.347</d>
<d>0.348</d>
<d>0.35</d>
<d>0.351</d>
<d>0.353</d>
<d>0.354</d>
<d>0.355</d>
<d>0.357</d>
<d>0.358</d>
<d>0.36</d>
<d>0.361</d>
<d>0.363</d>
<d>0.363</d>
<d>0.365</d>
<d>0.366</d>
<d>0.368</d>
<d>0.368</d>
<d>0.371</d>
<d>0.371</d>
<d>0.374</d>
<d>0.374</d>
<d>0.376</d>
<d>0.377</d>
<d>0.379</d>
<d>0.38</d>
<d>0.382</d>
<d>0.382</d>
<d>0.384</d>
<d>0.385</d>
<d>0.387</d>
<d>0.388</d>
<d>0.389</d>
<d>0.391</d>
<d>0.392</d>
<d>0.394</d>
<d>0.395</d>
<d>0.397</d>
<d>0.397</d>
<d>0.399</d>
<d>0.4</d>
<d>0.402</d>
<d>0.403</d>
<d>0.405</d>
<d>0.405</d>
<d>0.408</d>
<d>0.408</d>
<d>0.411</d>
<d>0.411</d>
<d>0.413</d>
<d>0.414</d>
<d>0.416</d>
<d>0.416</d>
<d>0.418</d>
<d>0.419</d>
<d>0.421</d>
<d>0.422</d>
<d>0.424</d>
<d>0.425</d>
<d>0.426</d>
<d>0.428</d>
<d>0.429</d>
<d>0.431</d>
<d>0.432</d>
<d>0.433</d>
<d>0.434</d>
<d>0.436</d>
<d>0.437</d>
<d>0.439</d>
<d>0.439</d>
<d>0.442</d>
<d>0.442</d>
<d>0.445</d>
<d>0.445</d>
<d>0.447</d>
<d>0.448</d>
<d>0.45</d>
<d>0.45</d>
<d>0.453</d>
<d>0.453</d>
<d>0.455</d>
<d>0.456</d>
<d>0.458</d>
<d>0.459</d>
<d>0.461</d>
<d>0.462</d>
<d>0.463</d>
<d>0.465</d>
<d>0.466</d>
<d>0.467</d>
<d>0.468</d>
<d>0.47</d>
<d>0.471</d>
<d>0.473</d>
<d>0.474</d>
<d>0.476</d>
<d>0.476</d>
<d>0.479</d>
<d>0.479</d>
<d>0.482</d>
<d>0.482</d>
<d>0.484</d>
<d>0.484</d>
<d>0.487</d>
<d>0.487</d>
<d>0.489</d>
<d>0.49</d>
<d>0.492</d>
<d>0.493</d>
<d>0.495</d>
<d>0.496</d>
<d>0.497</d>
<d>0.499</d>
<d>0.5</d>
<d>0.501</d>
<d>0.503</d>
<d>0.504</d>
<d>0.505</d>
<d>0.507</d>
<d>0.508</d>
<d>0.51</d>
<d>0.511</d>
<d>0.513</d>
<d>0.513</d>
<d>0.516</d>
<d>0.516</d>
<d>0.518</d>
<d>0.518</d>
<d>0.521</d>
<d>0.521</d>
<d>0.524</d>
<d>0.524</d>
<d>0.526</d>
<d>0.527</d>
<d>0.529</d>
<d>0.53</d>
<d>0.532</d>
<d>0.533</d>
<d>0.534</d>
<d>0.535</d>
<d>0.537</d>
<d>0.538</d>
<d>0.539</d>
<d>0.541</d>
<d>0.542</d>
<d>0.544</d>
<d>0.545</d>
<d>0.547</d>
<d>0.547</d>
<d>0.55</d>
<d>0.55</d>
<d>0.552</d>
<d>0.553</d>
<d>0.555</d>
<d>0.555</d>
<d>0.558</d>
<d>0.558</d>
<d>0.561</d>
<d>0.561</d>
<d>0.563</d>
<d>0.564</d>
<d>0.566</d>
<d>0.567</d>
<d>0.568</d>
<d>0.569</d>
<d>0.571</d>
<d>0.572</d>
<d>0.574</d>
<d>0.575</d>
<d>0.576</d>
<d>0.578</d>
<d>0.579</d>
<d>0.581</d>
<d>0.582</d>
<d>0.584</d>
<d>0.584</d>
<d>0.586</d>
<d>0.587</d>
<d>0.589</d>
<d>0.589</d>
<d>0.592</d>
<d>0.592</d>
<d>0.595</d>
<d>0.595</d>
<d>0.597</d>
<d>0.598</d>
<d>0.6</d>
<d>0.601</d>
<d>0.603</d>
<d>0.603</d>
<d>0.605</d>
<d>0.606</d>
<d>0.608</d>
<d>0.609</d>
<d>0.611</d>
<d>0.612</d>
<d>0.613</d>
<d>0.615</d>
<d>0.616</d>
<d>0.618</d>
<d>0.618</d>
<d>0.62</d>
<d>0.621</d>
<d>0.623</d>
<d>0.624</d>
<d>0.626</d>
<d>0.626</d>
<d>0.629</d>
<d>0.629</d>
<d>0.632</d>
<d>0.632</d>
<d>0.634</d>
<d>0.635</d>
<d>0.637</d>
<d>0.637</d>
<d>0.639</d>
<d>0.64</d>
<d>0.642</d>
<d>0.643</d>
<d>0.645</d>
<d>0.646</d>
<d>0.647</d>
<d>0.649</d>
<d>0.65</d>
<d>0.652</d>
<d>0.653</d>
<d>0.654</d>
<d>0.655</d>
<d>0.657</d>
<d>0.658</d>
<d>0.66</d>
<d>0.661</d>
<d>0.663</d>
<d>0.663</d>
<d>0.666</d>
<d>0.666</d>
<d>0.668</d>
<d>0.669</d>
<d>0.671</d>
<d>0.671</d>
<d>0.674</d>
<d>0.674</d>
<d>0.676</d>
<d>0.677</d>
<d>0.679</d>
<d>0.68</d>
<d>0.682</d>
<d>0.683</d>
<d>0.684</d>
<d>0.686</d>
<d>0.687</d>
<d>0.688</d>
<d>0.689</d>
<d>0.691</d>
<d>0.692</d>
<d>0.694</d>
<d>0.695</d>
<d>0.697</d>
<d>0.697</d>
<d>0.7</d>
<d>0.7</d>
<d>0.703</d>
<d>0.703</d>
<d>0.705</d>
<d>0.705</d>
<d>0.708</d>
<d>0.708</d>
<d>0.711</d>
<d>0.711</d>
<d>0.713</d>
<d>0.714</d>
<d>0.716</d>
<d>0.717</d>
<d>0.718</d>
<d>0.72</d>
<d>0.721</d>
<d>0.722</d>
<d>0.724</d>
<d>0.725</d>
<d>0.726</d>
<d>0.728</d>
<d>0.729</d>
<d>0.731</d>
<d>0.732</d>
<d>0.734</d>
<d>0.734</d>
<d>0.737</d>
<d>0.737</d>
<d>0.739</d>
<d>0.739</d>
<d>0.742</d>
<d>0.742</d>
<d>0.745</d>
<d>0.745</d>
<d>0.747</d>
<d>0.748</d>
<d>0.75</d>
<d>0.751</d>
<d>0.753</d>
<d>0.754</d>
<d>0.755</d>
<d>0.756</d>
<d>0.758</d>
<d>0.759</d>
<d>0.761</d>
<d>0.762</d>
<d>0.763</d>
<d>0.765</d>
<d>0.766</d>
<d>0.768</d>
<d>0.768</d>
<d>0.771</d>
<d>0.771</d>
<d>0.773</d>
<d>0.774</d>
<d>0.776</d>
<d>0.776</d>
<d>0.779</d>
<d>0.779</d>
<d>0.782</d>
<d>0.782</d>
<d>0.784</d>
<d>0.785</d>
<d>0.787</d>
<d>0.788</d>
<d>0.789</d>
<d>0.79</d>
<d>0.792</d>
<d>0.793</d>
<d>0.795</d>
<d>0.796</d>
<d>0.797</d>
<d>0.799</d>
<d>0.8</d>
<d>0.802</d>
<d>0.803</d>
<d>0.805</d>
<d>0.805</d>
<d>0.807</d>
<d>0.808</d>
<d>0.81</d>
<d>0.811</d>
<d>0.813</d>
<d>0.813</d>
<d>0.816</d>
<d>0.816</d>
<d>0.818</d>
<d>0.819</d>
<d>0.821</d>
<d>0.822</d>
<d>0.824</d>
<d>0.824</d>
<d>0.826</d>
<d>0.827</d>
<d>0.829</d>
<d>0.83</d>
<d>0.832</d>
<d>0.833</d>
<d>0.834</d>
<d>0.836</d>
<d>0.837</d>
<d>0.839</d>
<d>0.839</d>
<d>0.841</d>
<d>0.842</d>
<d>0.844</d>
<d>0.845</d>
<d>0.847</d>
<d>0.847</d>
<d>0.85</d>
<d>0.85</d>
<d>0.853</d>
<d>0.853</d>
<d>0.855</d>
<d>0.856</d>
<d>0.858</d>
<d>0.858</d>
<d>0.861</d>
<d>0.861</d>
<d>0.863</d>
<d>0.864</d>
<d>0.866</d>
<d>0.867</d>
<d>0.868</d>
<d>0.87</d>
<d>0.871</d>
<d>0.873</d>
<d>0.874</d>
<d>0.875</d>
<d>0.876</d>
<d>0.878</d>
<d>0.879</d>
<d>0.881</d>
<d>0.882</d>
<d>0.884</d>
<d>0.884</d>
<d>0.887</d>
<d>0.887</d>
<d>0.889</d>
<d>0.89</d>
<d>0.892</d>
<d>0.892</d>
<d>0.895</d>
<d>0.895</d>
<d>0.897</d>
<d>0.898</d>
<d>0.9</d>
<d>0.901</d>
<d>0.903</d>
<d>0.904</d>
<d>0.905</d>
<d>0.907</d>
<d>0.908</d>
<d>0.909</d>
<d>0.911</d>
<d>0.912</d>
<d>0.913</d>
<d>0.915</d>
<d>0.916</d>
<d>0.918</d>
<d>0.918</d>
<d>0.921</d>
<d>0.921</d>
<d>0.924</d>
<d>0.924</d>
<d>0.926</d>
<d>0.926</d>
<d>0.929</d>
<d>0.929</d>
<d>0.932</d>
<d>0.932</d>
<d>0.934</d>
<d>0.935</d>
<d>0.937</d>
<d>0.938</d>
<d>0.939</d>
<d>0.941</d>
<d>0.942</d>
<d>0.943</d>
<d>0.945</d>
<d>0.946</d>
<d>0.947</d>
<d>0.949</d>
<d>0.95</d>
<d>0.952</d>
<d>0.953</d>
<d>0.955</d>
<d>0.955</d>
<d>0.958</d>
<d>0.958</d>
<d>0.96</d>
<d>0.961</d>
<d>0.963</d>
<d>0.963</d>
<d>0.966</d>
<d>0.966</d>
<d>0.968</d>
<d>0.969</d>
<d>0.971</d>
<d>0.972</d>
<d>0.974</d>
<d>0.975</d>
<d>0.976</d>
<d>0.977</d>
<d>0.979</d>
<d>0.98</d>
<d>0.982</d>
<d>0.983</d>
<d>0.984</d>
<d>0.986</d>
<d>0.987</d>
<d>0.989</d>
<d>0.989</d>
<d>0.992</d>
<d>0.992</d>
<d>0.994</d>
<d>0.995</d>
<d>0.997</d>
<d>0.997</d>
<d>1</d>
<d>1</d>
</Subcolumn>
</XColumn>
<XAdvancedColumn Version="1" Width="51" Decimals="3" Subcolumns="1">
<Title></Title>
<Subcolumn>
<d>0</d>
<d>0</d>
<d>0.003</d>
<d>0.003</d>
<d>0.005</d>
<d>0.006</d>
<d>0.008</d>
<d>0.008</d>
<d>0.011</d>
<d>0.011</d>
<d>0.013</d>
<d>0.014</d>
<d>0.016</d>
<d>0.017</d>
<d>0.018</d>
<d>0.02</d>
<d>0.021</d>
<d>0.023</d>
<d>0.024</d>
<d>0.025</d>
<d>0.026</d>
<d>0.028</d>
<d>0.029</d>
<d>0.031</d>
<d>0.032</d>
<d>0.034</d>
<d>0.034</d>
<d>0.037</d>
<d>0.037</d>
<d>0.039</d>
<d>0.04</d>
<d>0.042</d>
<d>0.042</d>
<d>0.045</d>
<d>0.045</d>
<d>0.047</d>
<d>0.048</d>
<d>0.05</d>
<d>0.051</d>
<d>0.053</d>
<d>0.054</d>
<d>0.055</d>
<d>0.057</d>
<d>0.058</d>
<d>0.059</d>
<d>0.061</d>
<d>0.062</d>
<d>0.063</d>
<d>0.065</d>
<d>0.066</d>
<d>0.068</d>
<d>0.068</d>
<d>0.071</d>
<d>0.071</d>
<d>0.074</d>
<d>0.074</d>
<d>0.076</d>
<d>0.076</d>
<d>0.079</d>
<d>0.079</d>
<d>0.082</d>
<d>0.082</d>
<d>0.084</d>
<d>0.085</d>
<d>0.087</d>
<d>0.088</d>
<d>0.089</d>
<d>0.091</d>
<d>0.092</d>
<d>0.093</d>
<d>0.095</d>
<d>0.096</d>
<d>0.097</d>
<d>0.099</d>
<d>0.1</d>
<d>0.102</d>
<d>0.103</d>
<d>0.105</d>
<d>0.105</d>
<d>0.108</d>
<d>0.108</d>
<d>0.11</d>
<d>0.111</d>
<d>0.113</d>
<d>0.113</d>
<d>0.116</d>
<d>0.116</d>
<d>0.118</d>
<d>0.119</d>
<d>0.121</d>
<d>0.122</d>
<d>0.124</d>
<d>0.125</d>
<d>0.126</d>
<d>0.127</d>
<d>0.129</d>
<d>0.13</d>
<d>0.132</d>
<d>0.133</d>
<d>0.134</d>
<d>0.136</d>
<d>0.137</d>
<d>0.139</d>
<d>0.139</d>
<d>0.142</d>
<d>0.142</d>
<d>0.144</d>
<d>0.145</d>
<d>0.147</d>
<d>0.147</d>
<d>0.15</d>
<d>0.15</d>
<d>0.153</d>
<d>0.153</d>
<d>0.155</d>
<d>0.156</d>
<d>0.158</d>
<d>0.159</d>
<d>0.161</d>
<d>0.161</d>
<d>0.163</d>
<d>0.164</d>
<d>0.166</d>
<d>0.167</d>
<d>0.168</d>
<d>0.17</d>
<d>0.171</d>
<d>0.173</d>
<d>0.174</d>
<d>0.176</d>
<d>0.176</d>
<d>0.178</d>
<d>0.179</d>
<d>0.181</d>
<d>0.182</d>
<d>0.184</d>
<d>0.184</d>
<d>0.187</d>
<d>0.187</d>
<d>0.189</d>
<d>0.19</d>
<d>0.192</d>
<d>0.193</d>
<d>0.195</d>
<d>0.195</d>
<d>0.197</d>
<d>0.198</d>
<d>0.2</d>
<d>0.201</d>
<d>0.203</d>
<d>0.204</d>
<d>0.205</d>
<d>0.207</d>
<d>0.208</d>
<d>0.21</d>
<d>0.211</d>
<d>0.212</d>
<d>0.213</d>
<d>0.215</d>
<d>0.216</d>
<d>0.218</d>
<d>0.218</d>
<d>0.221</d>
<d>0.221</d>
<d>0.224</d>
<d>0.224</d>
<d>0.226</d>
<d>0.227</d>
<d>0.229</d>
<d>0.229</d>
<d>0.232</d>
<d>0.232</d>
<d>0.234</d>
<d>0.235</d>
<d>0.237</d>
<d>0.238</d>
<d>0.239</d>
<d>0.241</d>
<d>0.242</d>
<d>0.244</d>
<d>0.245</d>
<d>0.246</d>
<d>0.247</d>
<d>0.249</d>
<d>0.25</d>
<d>0.252</d>
<d>0.253</d>
<d>0.255</d>
<d>0.255</d>
<d>0.258</d>
<d>0.258</d>
<d>0.261</d>
<d>0.261</d>
<d>0.263</d>
<d>0.263</d>
<d>0.266</d>
<d>0.266</d>
<d>0.268</d>
<d>0.269</d>
<d>0.271</d>
<d>0.272</d>
<d>0.274</d>
<d>0.275</d>
<d>0.276</d>
<d>0.278</d>
<d>0.279</d>
<d>0.28</d>
<d>0.282</d>
<d>0.283</d>
<d>0.284</d>
<d>0.286</d>
<d>0.287</d>
<d>0.289</d>
<d>0.289</d>
<d>0.292</d>
<d>0.292</d>
<d>0.295</d>
<d>0.295</d>
<d>0.297</d>
<d>0.297</d>
<d>0.3</d>
<d>0.3</d>
<d>0.303</d>
<d>0.303</d>
<d>0.305</d>
<d>0.306</d>
<d>0.308</d>
<d>0.309</d>
<d>0.311</d>
<d>0.312</d>
<d>0.313</d>
<d>0.314</d>
<d>0.316</d>
<d>0.317</d>
<d>0.318</d>
<d>0.32</d>
<d>0.321</d>
<d>0.323</d>
<d>0.324</d>
<d>0.326</d>
<d>0.326</d>
<d>0.329</d>
<d>0.329</d>
<d>0.331</d>
<d>0.332</d>
<d>0.334</d>
<d>0.334</d>
<d>0.337</d>
<d>0.337</d>
<d>0.339</d>
<d>0.34</d>
<d>0.342</d>
<d>0.343</d>
<d>0.345</d>
<d>0.346</d>
<d>0.347</d>
<d>0.348</d>
<d>0.35</d>
<d>0.351</d>
<d>0.353</d>
<d>0.354</d>
<d>0.355</d>
<d>0.357</d>
<d>0.358</d>
<d>0.36</d>
<d>0.361</d>
<d>0.363</d>
<d>0.363</d>
<d>0.365</d>
<d>0.366</d>
<d>0.368</d>
<d>0.368</d>
<d>0.371</d>
<d>0.371</d>
<d>0.374</d>
<d>0.374</d>
<d>0.376</d>
<d>0.377</d>
<d>0.379</d>
<d>0.38</d>
<d>0.382</d>
<d>0.382</d>
<d>0.384</d>
<d>0.385</d>
<d>0.387</d>
<d>0.388</d>
<d>0.389</d>
<d>0.391</d>
<d>0.392</d>
<d>0.394</d>
<d>0.395</d>
<d>0.397</d>
<d>0.397</d>
<d>0.399</d>
<d>0.4</d>
<d>0.402</d>
<d>0.403</d>
<d>0.405</d>
<d>0.405</d>
<d>0.408</d>
<d>0.408</d>
<d>0.411</d>
<d>0.411</d>
<d>0.413</d>
<d>0.414</d>
<d>0.416</d>
<d>0.416</d>
<d>0.418</d>
<d>0.419</d>
<d>0.421</d>
<d>0.422</d>
<d>0.424</d>
<d>0.425</d>
<d>0.426</d>
<d>0.428</d>
<d>0.429</d>
<d>0.431</d>
<d>0.432</d>
<d>0.433</d>
<d>0.434</d>
<d>0.436</d>
<d>0.437</d>
<d>0.439</d>
<d>0.439</d>
<d>0.442</d>
<d>0.442</d>
<d>0.445</d>
<d>0.445</d>
<d>0.447</d>
<d>0.448</d>
<d>0.45</d>
<d>0.45</d>
<d>0.453</d>
<d>0.453</d>
<d>0.455</d>
<d>0.456</d>
<d>0.458</d>
<d>0.459</d>
<d>0.461</d>
<d>0.462</d>
<d>0.463</d>
<d>0.465</d>
<d>0.466</d>
<d>0.467</d>
<d>0.468</d>
<d>0.47</d>
<d>0.471</d>
<d>0.473</d>
<d>0.474</d>
<d>0.476</d>
<d>0.476</d>
<d>0.479</d>
<d>0.479</d>
<d>0.482</d>
<d>0.482</d>
<d>0.484</d>
<d>0.484</d>
<d>0.487</d>
<d>0.487</d>
<d>0.489</d>
<d>0.49</d>
<d>0.492</d>
<d>0.493</d>
<d>0.495</d>
<d>0.496</d>
<d>0.497</d>
<d>0.499</d>
<d>0.5</d>
<d>0.501</d>
<d>0.503</d>
<d>0.504</d>
<d>0.505</d>
<d>0.507</d>
<d>0.508</d>
<d>0.51</d>
<d>0.511</d>
<d>0.513</d>
<d>0.513</d>
<d>0.516</d>
<d>0.516</d>
<d>0.518</d>
<d>0.518</d>
<d>0.521</d>
<d>0.521</d>
<d>0.524</d>
<d>0.524</d>
<d>0.526</d>
<d>0.527</d>
<d>0.529</d>
<d>0.53</d>
<d>0.532</d>
<d>0.533</d>
<d>0.534</d>
<d>0.535</d>
<d>0.537</d>
<d>0.538</d>
<d>0.539</d>
<d>0.541</d>
<d>0.542</d>
<d>0.544</d>
<d>0.545</d>
<d>0.547</d>
<d>0.547</d>
<d>0.55</d>
<d>0.55</d>
<d>0.552</d>
<d>0.553</d>
<d>0.555</d>
<d>0.555</d>
<d>0.558</d>
<d>0.558</d>
<d>0.561</d>
<d>0.561</d>
<d>0.563</d>
<d>0.564</d>
<d>0.566</d>
<d>0.567</d>
<d>0.568</d>
<d>0.569</d>
<d>0.571</d>
<d>0.572</d>
<d>0.574</d>
<d>0.575</d>
<d>0.576</d>
<d>0.578</d>
<d>0.579</d>
<d>0.581</d>
<d>0.582</d>
<d>0.584</d>
<d>0.584</d>
<d>0.586</d>
<d>0.587</d>
<d>0.589</d>
<d>0.589</d>
<d>0.592</d>
<d>0.592</d>
<d>0.595</d>
<d>0.595</d>
<d>0.597</d>
<d>0.598</d>
<d>0.6</d>
<d>0.601</d>
<d>0.603</d>
<d>0.603</d>
<d>0.605</d>
<d>0.606</d>
<d>0.608</d>
<d>0.609</d>
<d>0.611</d>
<d>0.612</d>
<d>0.613</d>
<d>0.615</d>
<d>0.616</d>
<d>0.618</d>
<d>0.618</d>
<d>0.62</d>
<d>0.621</d>
<d>0.623</d>
<d>0.624</d>
<d>0.626</d>
<d>0.626</d>
<d>0.629</d>
<d>0.629</d>
<d>0.632</d>
<d>0.632</d>
<d>0.634</d>
<d>0.635</d>
<d>0.637</d>
<d>0.637</d>
<d>0.639</d>
<d>0.64</d>
<d>0.642</d>
<d>0.643</d>
<d>0.645</d>
<d>0.646</d>
<d>0.647</d>
<d>0.649</d>
<d>0.65</d>
<d>0.652</d>
<d>0.653</d>
<d>0.654</d>
<d>0.655</d>
<d>0.657</d>
<d>0.658</d>
<d>0.66</d>
<d>0.661</d>
<d>0.663</d>
<d>0.663</d>
<d>0.666</d>
<d>0.666</d>
<d>0.668</d>
<d>0.669</d>
<d>0.671</d>
<d>0.671</d>
<d>0.674</d>
<d>0.674</d>
<d>0.676</d>
<d>0.677</d>
<d>0.679</d>
<d>0.68</d>
<d>0.682</d>
<d>0.683</d>
<d>0.684</d>
<d>0.686</d>
<d>0.687</d>
<d>0.688</d>
<d>0.689</d>
<d>0.691</d>
<d>0.692</d>
<d>0.694</d>
<d>0.695</d>
<d>0.697</d>
<d>0.697</d>
<d>0.7</d>
<d>0.7</d>
<d>0.703</d>
<d>0.703</d>
<d>0.705</d>
<d>0.705</d>
<d>0.708</d>
<d>0.708</d>
<d>0.711</d>
<d>0.711</d>
<d>0.713</d>
<d>0.714</d>
<d>0.716</d>
<d>0.717</d>
<d>0.718</d>
<d>0.72</d>
<d>0.721</d>
<d>0.722</d>
<d>0.724</d>
<d>0.725</d>
<d>0.726</d>
<d>0.728</d>
<d>0.729</d>
<d>0.731</d>
<d>0.732</d>
<d>0.734</d>
<d>0.734</d>
<d>0.737</d>
<d>0.737</d>
<d>0.739</d>
<d>0.739</d>
<d>0.742</d>
<d>0.742</d>
<d>0.745</d>
<d>0.745</d>
<d>0.747</d>
<d>0.748</d>
<d>0.75</d>
<d>0.751</d>
<d>0.753</d>
<d>0.754</d>
<d>0.755</d>
<d>0.756</d>
<d>0.758</d>
<d>0.759</d>
<d>0.761</d>
<d>0.762</d>
<d>0.763</d>
<d>0.765</d>
<d>0.766</d>
<d>0.768</d>
<d>0.768</d>
<d>0.771</d>
<d>0.771</d>
<d>0.773</d>
<d>0.774</d>
<d>0.776</d>
<d>0.776</d>
<d>0.779</d>
<d>0.779</d>
<d>0.782</d>
<d>0.782</d>
<d>0.784</d>
<d>0.785</d>
<d>0.787</d>
<d>0.788</d>
<d>0.789</d>
<d>0.79</d>
<d>0.792</d>
<d>0.793</d>
<d>0.795</d>
<d>0.796</d>
<d>0.797</d>
<d>0.799</d>
<d>0.8</d>
<d>0.802</d>
<d>0.803</d>
<d>0.805</d>
<d>0.805</d>
<d>0.807</d>
<d>0.808</d>
<d>0.81</d>
<d>0.811</d>
<d>0.813</d>
<d>0.813</d>
<d>0.816</d>
<d>0.816</d>
<d>0.818</d>
<d>0.819</d>
<d>0.821</d>
<d>0.822</d>
<d>0.824</d>
<d>0.824</d>
<d>0.826</d>
<d>0.827</d>
<d>0.829</d>
<d>0.83</d>
<d>0.832</d>
<d>0.833</d>
<d>0.834</d>
<d>0.836</d>
<d>0.837</d>
<d>0.839</d>
<d>0.839</d>
<d>0.841</d>
<d>0.842</d>
<d>0.844</d>
<d>0.845</d>
<d>0.847</d>
<d>0.847</d>
<d>0.85</d>
<d>0.85</d>
<d>0.853</d>
<d>0.853</d>
<d>0.855</d>
<d>0.856</d>
<d>0.858</d>
<d>0.858</d>
<d>0.861</d>
<d>0.861</d>
<d>0.863</d>
<d>0.864</d>
<d>0.866</d>
<d>0.867</d>
<d>0.868</d>
<d>0.87</d>
<d>0.871</d>
<d>0.873</d>
<d>0.874</d>
<d>0.875</d>
<d>0.876</d>
<d>0.878</d>
<d>0.879</d>
<d>0.881</d>
<d>0.882</d>
<d>0.884</d>
<d>0.884</d>
<d>0.887</d>
<d>0.887</d>
<d>0.889</d>
<d>0.89</d>
<d>0.892</d>
<d>0.892</d>
<d>0.895</d>
<d>0.895</d>
<d>0.897</d>
<d>0.898</d>
<d>0.9</d>
<d>0.901</d>
<d>0.903</d>
<d>0.904</d>
<d>0.905</d>
<d>0.907</d>
<d>0.908</d>
<d>0.909</d>
<d>0.911</d>
<d>0.912</d>
<d>0.913</d>
<d>0.915</d>
<d>0.916</d>
<d>0.918</d>
<d>0.918</d>
<d>0.921</d>
<d>0.921</d>
<d>0.924</d>
<d>0.924</d>
<d>0.926</d>
<d>0.926</d>
<d>0.929</d>
<d>0.929</d>
<d>0.932</d>
<d>0.932</d>
<d>0.934</d>
<d>0.935</d>
<d>0.937</d>
<d>0.938</d>
<d>0.939</d>
<d>0.941</d>
<d>0.942</d>
<d>0.943</d>
<d>0.945</d>
<d>0.946</d>
<d>0.947</d>
<d>0.949</d>
<d>0.95</d>
<d>0.952</d>
<d>0.953</d>
<d>0.955</d>
<d>0.955</d>
<d>0.958</d>
<d>0.958</d>
<d>0.96</d>
<d>0.961</d>
<d>0.963</d>
<d>0.963</d>
<d>0.966</d>
<d>0.966</d>
<d>0.968</d>
<d>0.969</d>
<d>0.971</d>
<d>0.972</d>
<d>0.974</d>
<d>0.975</d>
<d>0.976</d>
<d>0.977</d>
<d>0.979</d>
<d>0.98</d>
<d>0.982</d>
<d>0.983</d>
<d>0.984</d>
<d>0.986</d>
<d>0.987</d>
<d>0.989</d>
<d>0.989</d>
<d>0.992</d>
<d>0.992</d>
<d>0.994</d>
<d>0.995</d>
<d>0.997</d>
<d>0.997</d>
<d>1</d>
<d>1</d>
</Subcolumn>
</XAdvancedColumn>
<YColumn Width="81" Decimals="8" Subcolumns="1">
<Title></Title>
<Subcolumn>
<d>0.47762049</d>
<d></d>
<d>0.20722162</d>
<d></d>
<d>0.45390067</d>
<d></d>
<d>0.44557216</d>
<d></d>
<d>0.31799376</d>
<d></d>
<d>0.67959426</d>
<d></d>
<d>0.59978388</d>
<d></d>
<d>0.41755375</d>
<d></d>
<d>0.43453913</d>
<d></d>
<d>0.5528696</d>
<d></d>
<d>0.87883365</d>
<d></d>
<d>0.50922106</d>
<d></d>
<d>0.47461149</d>
<d>0.50417619</d>
<d></d>
<d>0.2050186</d>
<d></d>
<d>0.05349947</d>
<d></d>
<d>0.11369159</d>
<d></d>
<d>0.12169173</d>
<d></d>
<d>0.21054108</d>
<d></d>
<d>0.15403261</d>
<d></d>
<d>0.15396694</d>
<d></d>
<d>0.11154827</d>
<d></d>
<d>0.11730359</d>
<d></d>
<d>0.01707493</d>
<d></d>
<d>0.04558291</d>
<d></d>
<d>0.04283659</d>
<d>0.05844284</d>
<d></d>
<d>0.04050222</d>
<d></d>
<d>0.08097458</d>
<d></d>
<d>0.07470582</d>
<d></d>
<d>0.06317725</d>
<d></d>
<d>0.05970256</d>
<d></d>
<d>0.02364221</d>
<d></d>
<d>0.05031732</d>
<d></d>
<d>0.01068079</d>
<d></d>
<d>0</d>
<d></d>
<d>0.03209013</d>
<d></d>
<d>0.04397691</d>
<d></d>
<d>0.00716431</d>
<d></d>
<d>0.07167293</d>
<d>0.03770814</d>
<d></d>
<d>0.0042747</d>
<d></d>
<d></d>
<d>0.0112599</d>
<d>0.00911061</d>
<d></d>
<d>0.00087166</d>
<d></d>
<d>0</d>
<d></d>
<d>0</d>
<d></d>
<d>0</d>
<d></d>
<d>0.04462169</d>
<d></d>
<d>0.04268136</d>
<d></d>
<d>0.03142146</d>
<d></d>
<d>0.03160057</d>
<d></d>
<d>0.01066288</d>
<d>0.03194684</d>
<d></d>
<d>0.01410772</d>
<d></d>
<d></d>
<d>0</d>
<d>0</d>
<d></d>
<d>0</d>
<d></d>
<d>0.03361851</d>
<d></d>
<d>0.0133674</d>
<d></d>
<d>0</d>
<d></d>
<d>0</d>
<d></d>
<d>0</d>
<d></d>
<d>0</d>
<d></d>
<d>0</d>
<d></d>
<d>0.03204236</d>
<d></d>
<d>0.01877646</d>
<d>0.00020299</d>
<d></d>
<d></d>
<d>0</d>
<d></d>
<d>0</d>
<d>0</d>
<d></d>
<d>0</d>
<d></d>
<d>0</d>
<d></d>
<d>0</d>
<d></d>
<d>0</d>
<d></d>
<d>0</d>
<d></d>
<d>0</d>
<d></d>
<d>0</d>
<d></d>
<d>0</d>
<d></d>
<d>0</d>
<d></d>
<d>0</d>
<d></d>
<d>0</d>
<d></d>
<d>0</d>
<d>0</d>
<d></d>
<d>0.01612566</d>
<d></d>
<d>0.01054347</d>
<d></d>
<d>0</d>
<d></d>
<d>0</d>
<d></d>
<d>0</d>
<d></d>
<d>0</d>
<d></d>
<d>0</d>
<d></d>
<d>0.00884195</d>
<d></d>
<d>0.01339128</d>
<d></d>
<d>0</d>
<d></d>
<d>0</d>
<d></d>
<d>0.01492564</d>
<d></d>
<d>0.01238231</d>
<d>0</d>
<d></d>
<d>0</d>
<d></d>
<d>0</d>
<d></d>
<d>0</d>
<d></d>
<d>0.0269378</d>
<d></d>
<d>0.0280005</d>
<d></d>
<d>0</d>
<d></d>
<d>0.01877646</d>
<d></d>
<d>0.03051398</d>
<d></d>
<d>0.01612566</d>
<d></d>
<d>0</d>
<d></d>
<d>0</d>
<d></d>
<d>0</d>
<d>0</d>
<d></d>
<d>0</d>
<d></d>
<d>0</d>
<d></d>
<d>0</d>
<d></d>
<d>0</d>
<d></d>
<d>0</d>
<d></d>
<d>0.0088121</d>
<d></d>
<d>0.01721822</d>
<d></d>
<d>0</d>
<d></d>
<d>0</d>
<d></d>
<d>0</d>
<d></d>
<d>0</d>
<d></d>
<d>0</d>
<d></d>
<d>0.00011343</d>
<d>0.00565383</d>
<d></d>
<d>0.00723595</d>
<d></d>
<d></d>
<d>0.01100915</d>
<d>0.02898559</d>
<d></d>
<d>0</d>
<d></d>
<d>0</d>
<d></d>
<d>0</d>
<d></d>
<d>0</d>
<d></d>
<d>0.00345081</d>
<d></d>
<d>0.00417918</d>
<d></d>
<d>0</d>
<d></d>
<d>0</d>
<d></d>
<d>0.0282214</d>
<d></d>
<d>0.08107608</d>
<d>0.06025183</d>
<d></d>
<d></d>
<d>0</d>
<d>0</d>
<d></d>
<d>0.00591652</d>
<d></d>
<d>0.02204219</d>
<d></d>
<d>0.01844809</d>
<d></d>
<d>0</d>
<d></d>
<d>0.00037016</d>
<d></d>
<d>0</d>
<d></d>
<d>0.02289593</d>
<d></d>
<d>0.07049081</d>
<d></d>
<d>0.0042747</d>
<d></d>
<d>0.01984513</d>
<d>0</d>
<d></d>
<d></d>
<d>0</d>
<d></d>
<d>0</d>
<d>0</d>
<d></d>
<d>0</d>
<d></d>
<d>0</d>
<d></d>
<d>0</d>
<d></d>
<d>0</d>
<d></d>
<d>0</d>
<d></d>
<d>0</d>
<d></d>
<d>0.00369559</d>
<d></d>
<d>0.03833501</d>
<d></d>
<d>0.08114175</d>
<d></d>
<d>0</d>
<d></d>
<d>0.00599414</d>
<d></d>
<d>0.04447244</d>
<d>0</d>
<d></d>
<d>0.0002209</d>
<d></d>
<d>0.00642997</d>
<d></d>
<d>0.00496128</d>
<d></d>
<d>0.04179179</d>
<d></d>
<d>0.03299761</d>
<d></d>
<d>0</d>
<d></d>
<d>0</d>
<d></d>
<d>0</d>
<d></d>
<d>0</d>
<d></d>
<d>0</d>
<d></d>
<d>0.0002806</d>
<d></d>
<d>0.00340305</d>
<d></d>
<d>0.05093823</d>
<d>0.01107483</d>
<d></d>
<d>0</d>
<d></d>
<d>0</d>
<d></d>
<d>0</d>
<d></d>
<d>0.00086569</d>
<d></d>
<d>0.03752903</d>
<d></d>
<d>0</d>
<d></d>
<d>0</d>
<d></d>
<d>0</d>
<d></d>
<d>0</d>
<d></d>
<d>0</d>
<d></d>
<d>0</d>
<d></d>
<d>0</d>
<d></d>
<d>0.05844284</d>
<d>0.00157018</d>
<d></d>
<d>0</d>
<d></d>
<d>0.03601259</d>
<d></d>
<d>0.00179705</d>
<d></d>
<d>0</d>
<d></d>
<d>0</d>
<d></d>
<d>0</d>
<d></d>
<d>0</d>
<d></d>
<d>0</d>
<d></d>
<d>0</d>
<d></d>
<d>0</d>
<d></d>
<d>0</d>
<d></d>
<d>0.05665176</d>
<d>0.00690759</d>
<d></d>
<d>0</d>
<d></d>
<d></d>
<d>0</d>
<d>0.01928393</d>
<d></d>
<d>0.00065673</d>
<d></d>
<d>0</d>
<d></d>
<d>0</d>
<d></d>
<d>0.03956489</d>
<d></d>
<d>0.00550458</d>
<d></d>
<d>0</d>
<d></d>
<d>0</d>
<d></d>
<d>0.05059195</d>
<d></d>
<d>0.00942703</d>
<d></d>
<d>0.01130767</d>
<d>0.00137316</d>
<d></d>
<d></d>
<d>0</d>
<d>0.09391213</d>
<d></d>
<d>0.07421625</d>
<d></d>
<d>0.01381517</d>
<d></d>
<d>0.04807847</d>
<d></d>
<d>0.03104533</d>
<d></d>
<d>0.03022144</d>
<d></d>
<d>0.03257969</d>
<d></d>
<d>0.03990519</d>
<d></d>
<d>0.02126008</d>
<d></d>
<d>0.20481561</d>
<d></d>
<d>0.41236559</d>
<d>0.42779871</d>
<d></d>
<d></d>
<d>0.92611211</d>
<d></d>
<d>0.79121417</d>
<d>0.73114145</d>
<d></d>
<d>0.64991015</d>
<d></d>
<d>0.74834773</d>
<d></d>
<d>0.60994525</d>
<d></d>
<d>0.44299898</d>
<d></d>
<d>0.4840027</d>
<d></d>
<d>0.37793513</d>
<d></d>
<d>0.45930375</d>
<d></d>
<d>0.32764169</d>
<d></d>
<d>0.13731589</d>
<d></d>
<d>0.19008699</d>
<d></d>
<d>0.25183735</d>
<d></d>
<d>0.2523687</d>
<d></d>
<d>0.27169442</d>
<d>0.12881425</d>
<d></d>
<d>0.10317797</d>
<d></d>
<d>0.14456378</d>
<d></d>
<d>0.16811047</d>
<d></d>
<d>0.13818158</d>
<d></d>
<d>0.15785357</d>
<d></d>
<d>0.15908345</d>
<d></d>
<d>0.27995128</d>
<d></d>
<d>0.23930578</d>
<d></d>
<d>0.31116378</d>
<d></d>
<d>0.32758199</d>
<d></d>
<d>0.35656758</d>
<d></d>
<d>0.51974065</d>
<d>0.55187854</d>
<d></d>
<d>0.35105106</d>
<d></d>
<d>0.29679935</d>
<d></d>
<d>0.5621235</d>
<d></d>
<d>0.59614202</d>
<d></d>
<d>0.24344317</d>
<d></d>
<d>0.14804444</d>
<d></d>
<d>0.16438503</d>
<d></d>
<d>0.1138707</d>
<d></d>
<d>0.10600787</d>
<d></d>
<d>0.11807973</d>
<d></d>
<d>0.16426563</d>
<d></d>
<d>0.25829119</d>
<d></d>
<d>0.27916321</d>
<d>0.2076873</d>
<d></d>
<d>0.21780689</d>
<d></d>
<d>0.19021236</d>
<d></d>
<d>0.1983737</d>
<d></d>
<d>0.20612906</d>
<d></d>
<d>0.32598196</d>
<d></d>
<d>0.49254614</d>
<d></d>
<d>0.75139853</d>
<d></d>
<d>1</d>
<d></d>
<d>0.72610256</d>
<d></d>
<d>0.5443202</d>
<d></d>
<d>0.66582685</d>
<d></d>
<d>0.51440324</d>
<d>0.33132534</d>
<d></d>
<d>0.3635289</d>
<d></d>
<d></d>
<d>0.29090073</d>
<d>0.28842308</d>
<d></d>
<d>0.38734425</d>
<d></d>
<d>0.35637653</d>
<d></d>
<d>0.29878147</d>
<d></d>
<d>0.34085387</d>
<d></d>
<d>0.50209855</d>
<d></d>
<d>0.59973611</d>
<d></d>
<d>0.62517538</d>
<d></d>
<d>0.63145609</d>
<d></d>
<d>0.54926357</d>
<d></d>
<d>0.42792408</d>
<d>0.49704771</d>
<d></d>
<d></d>
<d>0.45768581</d>
<d></d>
<d>0.46227097</d>
<d>0.49186553</d>
<d></d>
<d>0.40088479</d>
<d></d>
<d>0.46090975</d>
<d></d>
<d>0.38663976</d>
<d></d>
<d>0.49926267</d>
<d></d>
<d>0.71964871</d>
<d></d>
<d>0.94076909</d>
<d></d>
<d>0.7214577</d>
<d></d>
<d>0.62103202</d>
<d></d>
<d>0.38217401</d>
<d>0.21601581</d>
<d></d>
<d></d>
<d>0.31488325</d>
<d></d>
<d>0.47978173</d>
<d>0.65674012</d>
<d></d>
<d>0.74031177</d>
<d></d>
<d>0.83952548</d>
<d></d>
<d>0.92633898</d>
<d></d>
<d>0.41382831</d>
<d></d>
<d>0.2439387</d>
<d></d>
<d>0.39126671</d>
<d></d>
<d>0.63965922</d>
<d></d>
<d>0.5813119</d>
<d></d>
<d>0.445202</d>
<d></d>
<d>0.48523257</d>
<d></d>
<d>0.66935527</d>
<d></d>
<d>0.47279056</d>
<d></d>
<d>0.44065864</d>
<d>0.14569216</d>
<d></d>
<d>0.22143083</d>
<d></d>
<d>0.36633492</d>
<d></d>
<d>0.47354281</d>
<d></d>
<d>0.64762951</d>
<d></d>
<d>0.54323361</d>
<d></d>
<d>0.35582727</d>
<d></d>
<d>0.54860684</d>
<d></d>
<d>0.2961068</d>
<d></d>
<d>0.30359947</d>
<d></d>
<d>0.46343517</d>
<d></d>
<d>0.47565628</d>
<d></d>
<d>0.43128534</d>
<d>0.38896816</d>
<d></d>
<d>0.3297671</d>
<d></d>
<d>0.46536356</d>
<d></d>
<d>0.29928297</d>
<d></d>
<d>0.47756676</d>
<d></d>
<d>0.58803441</d>
<d></d>
<d>0.53231998</d>
<d></d>
<d>0.57226697</d>
<d></d>
<d>0.3008233</d>
<d></d>
<d>0.39138611</d>
<d></d>
<d>0.28251252</d>
<d></d>
<d>0.46141125</d>
<d></d>
<d>0.69553485</d>
<d></d>
<d>0.32613121</d>
<d>0.45522009</d>
<d></d>
<d>0.45025284</d>
<d></d>
<d></d>
<d>0.27353923</d>
<d>0.25201048</d>
<d></d>
<d>0.39541007</d>
<d></d>
<d>0.08071786</d>
<d></d>
<d>0.18707201</d>
<d></d>
<d>0.31588028</d>
<d></d>
<d>0.34383302</d>
<d></d>
<d>0.58151489</d>
<d></d>
<d>0.56797435</d>
<d></d>
<d>0.20249915</d>
<d></d>
<d>0.21400383</d>
<d>0.30749804</d>
<d></d>
<d>0.13850994</d>
<d></d>
<d></d>
<d>0.32109232</d>
<d>0.45487979</d>
<d></d>
<d>0.17910769</d>
</Subcolumn>
</YColumn>
<YColumn Width="84" Decimals="9" Subcolumns="1">
<Title></Title>
<Subcolumn>
<d></d>
<d>0.42723827</d>
<d></d>
<d>0.53355957</d>
<d></d>
<d>0.44958894</d>
<d></d>
<d>0.74578102</d>
<d></d>
<d>0.9523019</d>
<d></d>
<d>0.23737358</d>
<d></d>
<d>0.54475931</d>
<d></d>
<d>0.55936476</d>
<d></d>
<d>0.35230678</d>
<d></d>
<d>0.51630524</d>
<d></d>
<d>0.69108842</d>
<d></d>
<d>0.36556337</d>
<d></d>
<d></d>
<d>0.30507254</d>
<d></d>
<d>0.21177591</d>
<d></d>
<d>0.26879391</d>
<d></d>
<d>0.12770762</d>
<d></d>
<d>0.25956556</d>
<d></d>
<d>0.38105381</d>
<d></d>
<d>0.32701428</d>
<d></d>
<d>0.4821628</d>
<d></d>
<d>0.38834128</d>
<d></d>
<d>0.14176376</d>
<d></d>
<d>0.17797526</d>
<d></d>
<d>0.19085954</d>
<d></d>
<d></d>
<d>0.46543337</d>
<d></d>
<d>0.15437339</d>
<d></d>
<d>0.18259553</d>
<d></d>
<d>0.57111381</d>
<d></d>
<d>0.51008587</d>
<d></d>
<d>0.46916255</d>
<d></d>
<d>0.26693847</d>
<d></d>
<d>0.25485984</d>
<d></d>
<d>0.1692718</d>
<d></d>
<d>0.27571517</d>
<d></d>
<d>0.77159232</d>
<d></d>
<d>0.42006677</d>
<d></d>
<d>0.21919154</d>
<d></d>
<d></d>
<d>0.52281758</d>
<d></d>
<d>0.32002588</d>
<d>0.10855514</d>
<d></d>
<d></d>
<d>0.19380138</d>
<d></d>
<d>0.21471775</d>
<d></d>
<d>0.17674847</d>
<d></d>
<d>0.30455375</d>
<d></d>
<d>0.21815396</d>
<d></d>
<d>0.03174991</d>
<d></d>
<d>0.0007202</d>
<d></d>
<d>0.05291041</d>
<d></d>
<d>0.00764146</d>
<d></d>
<d></d>
<d>0.00863632</d>
<d></d>
<d>0.0021545</d>
<d>0</d>
<d></d>
<d></d>
<d>0</d>
<d></d>
<d>0.02571364</d>
<d></d>
<d>0.03429503</d>
<d></d>
<d>0.04114915</d>
<d></d>
<d>0.12430803</d>
<d></d>
<d>0.11136881</d>
<d></d>
<d>0.12064598</d>
<d></d>
<d>0.07080559</d>
<d></d>
<d>0.12071312</d>
<d></d>
<d>0.24022998</d>
<d></d>
<d></d>
<d>0.22008264</d>
<d>0.27646589</d>
<d></d>
<d>0.15391564</d>
<d></d>
<d></d>
<d>0.09836856</d>
<d></d>
<d>0.15865188</d>
<d></d>
<d>0.21837369</d>
<d></d>
<d>0.06620973</d>
<d></d>
<d>0.00324701</d>
<d></d>
<d>0.04893099</d>
<d></d>
<d>0.06434819</d>
<d></d>
<d>0.06977411</d>
<d></d>
<d>0.06360968</d>
<d></d>
<d>0.06103404</d>
<d></d>
<d>0.01296973</d>
<d></d>
<d>0.1577913</d>
<d></d>
<d></d>
<d>0.09723943</d>
<d></d>
<d>0.01348852</d>
<d></d>
<d>0.09474924</d>
<d></d>
<d>0.02766673</d>
<d></d>
<d>0.04156418</d>
<d></d>
<d>0.01519748</d>
<d></d>
<d>0.0050231</d>
<d></d>
<d>0.04408489</d>
<d></d>
<d>0.01140726</d>
<d></d>
<d>0</d>
<d></d>
<d>0</d>
<d></d>
<d>0.02388262</d>
<d></d>
<d>0.02662915</d>
<d></d>
<d></d>
<d>0.02144126</d>
<d></d>
<d>0.00418694</d>
<d></d>
<d>0.0369439</d>
<d></d>
<d>0.0145322</d>
<d></d>
<d>0</d>
<d></d>
<d>0</d>
<d></d>
<d>0.00704943</d>
<d></d>
<d>0.00408318</d>
<d></d>
<d>0</d>
<d></d>
<d>0.02575026</d>
<d></d>
<d>0.00866683</d>
<d></d>
<d>0</d>
<d></d>
<d></d>
<d>0</d>
<d></d>
<d>0.03257387</d>
<d></d>
<d>0.01507541</d>
<d></d>
<d>0</d>
<d></d>
<d>0.0003601</d>
<d></d>
<d>0.00172726</d>
<d></d>
<d>0</d>
<d></d>
<d>0</d>
<d></d>
<d>0</d>
<d></d>
<d>0.01813321</d>
<d></d>
<d>0.0100401</d>
<d></d>
<d>0.02503616</d>
<d></d>
<d>0.02644605</d>
<d></d>
<d></d>
<d>0.00450431</d>
<d></d>
<d>0.01160867</d>
<d>0.00229488</d>
<d></d>
<d></d>
<d>0</d>
<d></d>
<d>0</d>
<d></d>
<d>0</d>
<d></d>
<d>0</d>
<d></d>
<d>0</d>
<d></d>
<d>0</d>
<d></d>
<d>0</d>
<d></d>
<d>0</d>
<d></d>
<d>0</d>
<d></d>
<d>0</d>
<d></d>
<d></d>
<d>0</d>
<d>0</d>
<d></d>
<d></d>
<d>0.00185543</d>
<d></d>
<d>0.00301508</d>
<d></d>
<d>0</d>
<d></d>
<d>0</d>
<d></d>
<d>0.03786552</d>
<d></d>
<d>0.04319989</d>
<d></d>
<d>0.0103941</d>
<d></d>
<d>0</d>
<d></d>
<d>0</d>
<d></d>
<d>0</d>
<d></d>
<d></d>
<d>0</d>
<d>0</d>
<d></d>
<d>0</d>
<d></d>
<d></d>
<d>0</d>
<d></d>
<d>0</d>
<d></d>
<d>0</d>
<d></d>
<d>0</d>
<d></d>
<d>0</d>
<d></d>
<d>0</d>
<d></d>
<d>0.02338214</d>
<d></d>
<d>0.02824655</d>
<d></d>
<d>0.00436393</d>
<d></d>
<d>0</d>
<d></d>
<d>0.000073241</d>
<d></d>
<d>0</d>
<d></d>
<d></d>
<d>0.02831979</d>
<d></d>
<d>0.02001916</d>
<d></d>
<d>0</d>
<d></d>
<d>0.02884469</d>
<d></d>
<d>0.02819162</d>
<d></d>
<d>0</d>
<d></d>
<d>0</d>
<d></d>
<d>0</d>
<d></d>
<d>0.02801462</d>
<d></d>
<d>0.03269593</d>
<d></d>
<d>0</d>
<d></d>
<d>0</d>
<d></d>
<d>0</d>
<d></d>
<d></d>
<d>0</d>
<d></d>
<d>0</d>
<d></d>
<d>0.0141599</d>
<d></d>
<d>0.01574678</d>
<d></d>
<d>0</d>
<d></d>
<d>0.00925886</d>
<d></d>
<d>0.05513815</d>
<d></d>
<d>0.05280055</d>
<d></d>
<d>0</d>
<d></d>
<d>0</d>
<d></d>
<d>0</d>
<d></d>
<d>0.03008368</d>
<d></d>
<d>0.03112126</d>
<d></d>
<d></d>
<d>0</d>
<d></d>
<d>0.01381811</d>
<d></d>
<d>0.01748015</d>
<d></d>
<d>0.02119102</d>
<d></d>
<d>0.01776091</d>
<d></d>
<d>0</d>
<d></d>
<d>0</d>
<d></d>
<d>0.0557668</d>
<d></d>
<d>0.06128428</d>
<d></d>
<d>0</d>
<d></d>
<d>0</d>
<d></d>
<d>0.05299586</d>
<d></d>
<d></d>
<d>0.10279963</d>
<d></d>
<d>0.05947767</d>
<d>0.03858572</d>
<d></d>
<d></d>
<d>0.04498819</d>
<d></d>
<d>0.0593434</d>
<d></d>
<d>0</d>
<d></d>
<d>0</d>
<d></d>
<d>0</d>
<d></d>
<d>0</d>
<d></d>
<d>0.02174643</d>
<d></d>
<d>0.06504398</d>
<d></d>
<d>0.07281971</d>
<d></d>
<d>0.05568135</d>
<d></d>
<d></d>
<d>0.03059026</d>
<d>0.02489578</d>
<d></d>
<d></d>
<d>0.01161478</d>
<d></d>
<d>0.00592641</d>
<d></d>
<d>0.03027899</d>
<d></d>
<d>0.03815238</d>
<d></d>
<d>0.00103758</d>
<d></d>
<d>0.02549392</d>
<d></d>
<d>0.03008368</d>
<d></d>
<d>0</d>
<d></d>
<d>0</d>
<d></d>
<d>0.02078209</d>
<d></d>
<d></d>
<d>0.03972095</d>
<d>0.02835641</d>
<d></d>
<d>0.05998425</d>
<d></d>
<d></d>
<d>0.03115788</d>
<d></d>
<d>0.05801896</d>
<d></d>
<d>0.0580922</d>
<d></d>
<d>0.1475681</d>
<d></d>
<d>0.22912788</d>
<d></d>
<d>0.27169913</d>
<d></d>
<d>0.33298951</d>
<d></d>
<d>0.08698571</d>
<d></d>
<d>0.10568044</d>
<d></d>
<d>0.18625758</d>
<d></d>
<d>0.11792997</d>
<d></d>
<d>0.2221578</d>
<d></d>
<d>0.25125883</d>
<d></d>
<d></d>
<d>0.09257643</d>
<d></d>
<d>0.00748888</d>
<d></d>
<d>0.0439384</d>
<d></d>
<d>0.09336377</d>
<d></d>
<d>0.07795878</d>
<d></d>
<d>0.11861965</d>
<d></d>
<d>0.0860702</d>
<d></d>
<d>0.06103404</d>
<d></d>
<d>0.06935298</d>
<d></d>
<d>0.08978717</d>
<d></d>
<d>0.09822818</d>
<d></d>
<d>0.13296265</d>
<d></d>
<d></d>
<d>0.14108628</d>
<d></d>
<d>0.20008179</d>
<d></d>
<d>0.19659674</d>
<d></d>
<d>0.10004089</d>
<d></d>
<d>0.0941389</d>
<d></d>
<d>0.0928877</d>
<d></d>
<d>0.0923506</d>
<d></d>
<d>0.20565419</d>
<d></d>
<d>0.08663171</d>
<d></d>
<d>0.21025006</d>
<d></d>
<d>0.13432371</d>
<d></d>
<d>0.15111418</d>
<d></d>
<d>0.11912624</d>
<d></d>
<d></d>
<d>0.19216567</d>
<d></d>
<d>0.49025592</d>
<d></d>
<d>0.4495218</d>
<d></d>
<d>0.36555117</d>
<d></d>
<d>0.18852804</d>
<d></d>
<d>0.47364245</d>
<d></d>
<d>0.52370867</d>
<d></d>
<d>0.51817289</d>
<d></d>
<d>0.65193508</d>
<d></d>
<d>0.62605055</d>
<d></d>
<d>0.85700945</d>
<d></d>
<d>0.71476963</d>
<d></d>
<d></d>
<d>0.61306861</d>
<d></d>
<d>0.44524942</d>
<d>0.39523812</d>
<d></d>
<d></d>
<d>0.29095537</d>
<d></d>
<d>0.36859066</d>
<d></d>
<d>0.161551</d>
<d></d>
<d>0.33895253</d>
<d></d>
<d>0.27765605</d>
<d></d>
<d>0.2478104</d>
<d></d>
<d>0.42187948</d>
<d></d>
<d>0.21543795</d>
<d></d>
<d>0.53240602</d>
<d></d>
<d>0.70635303</d>
<d></d>
<d></d>
<d>0.57895668</d>
<d>0.51976587</d>
<d></d>
<d>0.52068749</d>
<d></d>
<d></d>
<d>0.47118888</d>
<d></d>
<d>0.36190133</d>
<d></d>
<d>0.59723028</d>
<d></d>
<d>0.58162387</d>
<d></d>
<d>0.507437</d>
<d></d>
<d>0.51340613</d>
<d></d>
<d>0.5295008</d>
<d></d>
<d>0.46506717</d>
<d></d>
<d>0.92559951</d>
<d></d>
<d></d>
<d>0.94281721</d>
<d>1</d>
<d></d>
<d>0.75975782</d>
<d></d>
<d></d>
<d>0.63670099</d>
<d></d>
<d>0.38938496</d>
<d></d>
<d>0.50372613</d>
<d></d>
<d>0.62843088</d>
<d></d>
<d>0.85252345</d>
<d></d>
<d>0.70039611</d>
<d></d>
<d>0.57558761</d>
<d></d>
<d>0.62116172</d>
<d></d>
<d>0.38375152</d>
<d></d>
<d>0.78390899</d>
<d></d>
<d>0.50312799</d>
<d></d>
<d>0.55595906</d>
<d></d>
<d>0.65553609</d>
<d></d>
<d></d>
<d>0.58303986</d>
<d></d>
<d>0.6634461</d>
<d></d>
<d>0.73951893</d>
<d></d>
<d>0.74618995</d>
<d></d>
<d>0.96737731</d>
<d></d>
<d>0.8610438</d>
<d></d>
<d>0.46466434</d>
<d></d>
<d>0.32890023</d>
<d></d>
<d>0.50217586</d>
<d></d>
<d>0.59526498</d>
<d></d>
<d>0.59916505</d>
<d></d>
<d>0.65462669</d>
<d></d>
<d></d>
<d>0.54193344</d>
<d></d>
<d>0.71036297</d>
<d></d>
<d>0.62224202</d>
<d></d>
<d>0.44927156</d>
<d></d>
<d>0.39497568</d>
<d></d>
<d>0.47994116</d>
<d></d>
<d>0.44730016</d>
<d></d>
<d>0.72944831</d>
<d></d>
<d>0.57066826</d>
<d></d>
<d>0.52509415</d>
<d></d>
<d>0.63916066</d>
<d></d>
<d>0.72123924</d>
<d></d>
<d>0.53707513</d>
<d></d>
<d></d>
<d>0.69277906</d>
<d></d>
<d>0.63884939</d>
<d>0.3792411</d>
<d></d>
<d></d>
<d>0.77863565</d>
<d></d>
<d>0.72509659</d>
<d></d>
<d>0.56728698</d>
<d></d>
<d>0.5397118</d>
<d></d>
<d>0.72792246</d>
<d></d>
<d>0.51916774</d>
<d></d>
<d>0.66546633</d>
<d></d>
<d>0.42752513</d>
<d></d>
<d>0.3171878</d>
<d></d>
<d></d>
<d>0.54529641</d>
<d></d>
<d>0.4134751</d>
<d>0.65772111</d>
<d></d>
<d></d>
<d>0.2998114</d>
<d></d>
<d>0.24413615</d>
</Subcolumn>
</YColumn>
</Table>
<Table ID="Table6" XFormat="none" TableType="OneWay" EVFormat="AsteriskAfterNumber">
<Title>Copy of 4-cell</Title>
<RowTitlesColumn Width="32">
<Subcolumn></Subcolumn>
</RowTitlesColumn>
<YColumn Width="81" Decimals="8" Subcolumns="1">
<Title>Basal</Title>
<Subcolumn>
<d>0.47762049</d>
<d>0.20722162</d>
<d>0.45390067</d>
<d>0.44557216</d>
<d>0.31799376</d>
<d>0.67959426</d>
<d>0.59978388</d>
<d>0.41755375</d>
<d>0.43453913</d>
<d>0.5528696</d>
<d>0.87883365</d>
<d>0.50922106</d>
<d>0.47461149</d>
<d>0.50417619</d>
<d>0.2050186</d>
<d>0.05349947</d>
<d>0.11369159</d>
<d>0.12169173</d>
<d>0.21054108</d>
<d>0.15403261</d>
<d>0.15396694</d>
<d>0.11154827</d>
<d>0.11730359</d>
<d>0.42723827</d>
<d>0.53355957</d>
<d>0.44958894</d>
<d>0.74578102</d>
<d>0.9523019</d>
<d>0.23737358</d>
<d>0.54475931</d>
<d>0.55936476</d>
<d>0.35230678</d>
<d>0.51630524</d>
<d>0.69108842</d>
<d>0.36556337</d>
<d>0.30507254</d>
<d>0.21177591</d>
<d>0.26879391</d>
<d>0.12770762</d>
<d>0.25956556</d>
<d>0.38105381</d>
<d>0.32701428</d>
<d>0.4821628</d>
<d>0.38834128</d>
<d>0.14176376</d>
</Subcolumn>
</YColumn>
<YColumn Width="84" Decimals="9" Subcolumns="1">
<Title>Apical</Title>
<Subcolumn>
<d>0.53707513</d>
<d>0.69277906</d>
<d>0.63884939</d>
<d>0.3792411</d>
<d>0.77863565</d>
<d>0.72509659</d>
<d>0.56728698</d>
<d>0.5397118</d>
<d>0.72792246</d>
<d>0.51916774</d>
<d>0.66546633</d>
<d>0.42752513</d>
<d>0.3171878</d>
<d>0.54529641</d>
<d>0.4134751</d>
<d>0.65772111</d>
<d>0.2998114</d>
<d>0.24413615</d>
<d>0.69553485</d>
<d>0.32613121</d>
<d>0.45522009</d>
<d>0.45025284</d>
<d>0.27353923</d>
<d>0.25201048</d>
<d>0.39541007</d>
<d>0.08071786</d>
<d>0.18707201</d>
<d>0.31588028</d>
<d>0.34383302</d>
<d>0.58151489</d>
<d>0.56797435</d>
<d>0.20249915</d>
<d>0.21400383</d>
<d>0.30749804</d>
<d>0.13850994</d>
<d>0.32109232</d>
<d>0.45487979</d>
<d>0.17910769</d>
</Subcolumn>
</YColumn>
</Table>
<Table ID="Table1" XFormat="numbers" YFormat="replicates" Replicates="1" TableType="XY" EVFormat="AsteriskAfterNumber">
<Title>8-cell</Title>
<RowTitlesColumn Width="32">
<Subcolumn></Subcolumn>
</RowTitlesColumn>
<XColumn Width="77" Subcolumns="1" Decimals="8">
<Title></Title>
<Subcolumn>
<d>0</d>
<d>0</d>
<d>0</d>
<d>0</d>
<d>0</d>
<d>0</d>
<d>0.0041669</d>
<d>0.00438622</d>
<d>0.00460855</d>
<d>0.00518164</d>
<d>0.00537664</d>
<d>0.00555587</d>
<d>0.00833381</d>
<d>0.00877243</d>
<d>0.0092171</d>
<d>0.01036327</d>
<d>0.01075328</d>
<d>0.01111174</d>
<d>0.01250071</d>
<d>0.01315865</d>
<d>0.01382565</d>
<d>0.01554491</d>
<d>0.01612992</d>
<d>0.01666761</d>
<d>0.01666761</d>
<d>0.01754487</d>
<d>0.01843419</d>
<d>0.02072655</d>
<d>0.02083452</d>
<d>0.02150656</d>
<d>0.02193108</d>
<d>0.02222349</d>
<d>0.02304274</d>
<d>0.02499905</d>
<d>0.02590819</d>
<d>0.0263148</d>
<d>0.0268832</d>
<d>0.02764867</d>
<d>0.02777936</d>
<d>0.02916596</d>
<d>0.03070102</d>
<d>0.03108688</d>
<d>0.03225678</d>
<d>0.03225722</d>
<d>0.03333207</d>
<d>0.03333286</d>
<d>0.03508724</d>
<d>0.03626851</d>
<d>0.03686577</d>
<d>0.03749976</d>
<d>0.03763342</d>
<d>0.03888794</d>
<d>0.03947345</d>
<d>0.04145015</d>
<d>0.04147432</d>
<d>0.04166667</d>
<d>0.04301006</d>
<d>0.04385967</d>
<d>0.04444381</d>
<d>0.04583357</d>
<d>0.04608286</d>
<d>0.04663179</d>
<d>0.04824589</d>
<d>0.0483867</d>
<d>0.04999968</d>
<d>0.05000047</d>
<d>0.05069141</d>
<d>0.05181343</d>
<d>0.0526321</d>
<d>0.05376334</d>
<d>0.05416738</d>
<d>0.05529996</d>
<d>0.05555556</d>
<d>0.05699506</d>
<d>0.05701832</d>
<d>0.05833428</d>
<d>0.05913998</d>
<d>0.05990851</d>
<d>0.06111143</d>
<d>0.06140454</d>
<d>0.0621767</d>
<d>0.06250119</d>
<d>0.06451662</d>
<d>0.06451706</d>
<d>0.06579075</d>
<d>0.06666572</d>
<d>0.0666673</d>
<d>0.06735834</d>
<d>0.06912561</d>
<d>0.06989326</d>
<d>0.07017448</d>
<d>0.07083262</d>
<d>0.07222317</d>
<d>0.07253997</d>
<d>0.07373154</d>
<d>0.07456069</d>
<d>0.07499953</d>
<d>0.0752699</d>
<d>0.07772161</d>
<d>0.07777904</d>
<d>0.07834008</d>
<d>0.07894691</d>
<d>0.07916643</d>
<d>0.08064654</d>
<d>0.0829003</d>
<d>0.08294863</d>
<d>0.08333313</d>
<d>0.08333333</d>
<d>0.08333491</d>
<d>0.08602012</d>
<d>0.08750024</d>
<d>0.08755718</d>
<d>0.08771934</d>
<d>0.08808194</d>
<d>0.08888762</d>
<d>0.09139676</d>
<d>0.09166714</d>
<d>0.09210556</d>
<d>0.09216573</d>
<d>0.09326358</d>
<d>0.0944435</d>
<d>0.09583404</d>
<d>0.09649178</d>
<d>0.0967734</d>
<d>0.09677428</d>
<d>0.09844521</d>
<d>0.09999937</d>
<d>0.10000095</d>
<d>0.10087799</d>
<d>0.10138283</d>
<d>0.10215004</d>
<d>0.10362685</d>
<d>0.10416785</d>
<d>0.10526421</d>
<d>0.10555524</d>
<d>0.10599138</d>
<d>0.10752668</d>
<d>0.10833239</d>
<d>0.10880849</d>
<d>0.10965043</d>
<d>0.11059992</d>
<d>0.11111111</d>
<d>0.11249929</d>
<d>0.11290332</d>
<d>0.11399013</d>
<d>0.11403415</d>
<d>0.11520847</d>
<d>0.11666619</d>
<d>0.11666698</d>
<d>0.11827996</d>
<d>0.11842036</d>
<d>0.11917176</d>
<d>0.1198144</d>
<d>0.1208331</d>
<d>0.12222285</d>
<d>0.12280658</d>
<d>0.1236566</d>
<d>0.1243534</d>
<d>0.12442295</d>
<d>0.125</d>
<d>0.1271928</d>
<d>0.12777873</d>
<d>0.1290315</d>
<d>0.12903324</d>
<d>0.1291669</d>
<d>0.12953504</d>
<d>0.13157901</d>
<d>0.13333381</d>
<d>0.1333346</d>
<d>0.13364005</d>
<d>0.13440988</d>
<d>0.13471373</d>
<d>0.13596523</d>
<d>0.13750071</d>
<d>0.13824859</d>
<d>0.13889047</d>
<d>0.13978347</d>
<d>0.13989537</d>
<d>0.14035145</d>
<d>0.14166761</d>
<d>0.14285714</d>
<d>0.14444318</d>
<d>0.14473766</d>
<d>0.145077</d>
<d>0.14516011</d>
<d>0.14583452</d>
<d>0.14746569</d>
<d>0.14912388</d>
<d>0.14999905</d>
<d>0.14999905</d>
<d>0.15025864</d>
<d>0.15053675</d>
<d>0.15207424</d>
<d>0.1535101</d>
<d>0.15416596</d>
<d>0.15544028</d>
<d>0.15555492</d>
<d>0.15591339</d>
<d>0.15668279</d>
<d>0.15789382</d>
<d>0.15833286</d>
<d>0.16062191</d>
<d>0.1611108</d>
<d>0.16129003</d>
<d>0.16129134</d>
<d>0.16228003</d>
<d>0.16249976</d>
<d>0.16580355</d>
<d>0.16589726</d>
<d>0.16666625</d>
<d>0.16666667</d>
<d>0.16666667</d>
<d>0.16666667</d>
<d>0.17050581</d>
<d>0.17083357</d>
<d>0.17098519</d>
<d>0.17105247</d>
<d>0.17204331</d>
<d>0.17222254</d>
<d>0.17500047</d>
<d>0.17511436</d>
<d>0.17543868</d>
<d>0.17616683</d>
<d>0.17741995</d>
<d>0.17777841</d>
<d>0.17916738</d>
<d>0.17972291</d>
<d>0.1798249</d>
<d>0.18134846</d>
<d>0.18279659</d>
<d>0.18333428</d>
<d>0.18333428</d>
<d>0.18421112</d>
<d>0.18433146</d>
<d>0.18652715</d>
<d>0.18750119</d>
<d>0.18817323</d>
<d>0.18859733</d>
<d>0.18889015</d>
<d>0.18894001</d>
<d>0.19166572</d>
<d>0.19170879</d>
<d>0.19298355</d>
<d>0.19354681</d>
<d>0.19354856</d>
<d>0.19444602</d>
<d>0.19583262</d>
<d>0.19689043</d>
<d>0.19736977</d>
<d>0.1981571</d>
<d>0.19892345</d>
<d>0.19999874</d>
<d>0.19999953</d>
<d>0.20175349</d>
<d>0.20207207</d>
<d>0.20276565</d>
<d>0.20416643</d>
<d>0.20430009</d>
<d>0.20555461</d>
<d>0.20613971</d>
<d>0.2072537</d>
<d>0.2073742</d>
<d>0.20833333</d>
<d>0.20967673</d>
<d>0.21052592</d>
<d>0.21111048</d>
<d>0.21198013</d>
<d>0.21243534</d>
<d>0.21250024</d>
<d>0.21491214</d>
<d>0.21505337</d>
<d>0.21658868</d>
<d>0.21666635</d>
<d>0.21666714</d>
<d>0.21761698</d>
<d>0.21929836</d>
<d>0.22043001</d>
<d>0.22083404</d>
<d>0.22119723</d>
<d>0.22222222</d>
<d>0.22279861</d>
<d>0.22368457</d>
<d>0.22500095</d>
<d>0.22580578</d>
<d>0.22580665</d>
<d>0.22777809</d>
<d>0.22798025</d>
<d>0.22807079</d>
<d>0.22916785</d>
<d>0.23041432</d>
<d>0.23118329</d>
<d>0.232457</d>
<d>0.23316189</d>
<d>0.23333239</d>
<d>0.23333397</d>
<d>0.23502287</d>
<d>0.23655993</d>
<d>0.23684322</d>
<d>0.23749929</d>
<d>0.23834058</d>
<d>0.23888984</d>
<d>0.23963142</d>
<d>0.24122944</d>
<d>0.24166619</d>
<d>0.24193657</d>
<d>0.24352222</d>
<d>0.24423997</d>
<d>0.24444571</d>
<d>0.24561316</d>
<d>0.2458331</d>
<d>0.24731015</d>
<d>0.24870385</d>
<d>0.24884852</d>
<d>0.24999938</d>
<d>0.25</d>
<d>0.25000158</d>
<d>0.25268679</d>
<d>0.25345707</d>
<d>0.25388549</d>
<d>0.2541669</d>
<d>0.25438559</d>
<d>0.25555429</d>
<d>0.25806299</d>
<d>0.25806343</d>
<d>0.25833381</d>
<d>0.25877181</d>
<d>0.25906713</d>
<d>0.26111016</d>
<d>0.26250071</d>
<d>0.26267154</d>
<d>0.26315803</d>
<d>0.26344007</d>
<d>0.26424877</d>
<d>0.26666603</d>
<d>0.26666761</d>
<d>0.26728009</d>
<d>0.26754424</d>
<d>0.26881671</d>
<d>0.2694304</d>
<d>0.27083452</d>
<d>0.27188864</d>
<d>0.27193046</d>
<d>0.27222191</d>
<d>0.27419335</d>
<d>0.27461204</d>
<d>0.27499905</d>
<d>0.27631668</d>
<d>0.27649719</d>
<d>0.27777778</d>
<d>0.27916596</d>
<d>0.27956999</d>
<d>0.27979368</d>
<d>0.28070289</d>
<d>0.28110574</d>
<d>0.28333286</d>
<d>0.28333365</d>
<d>0.28494663</d>
<d>0.28497532</d>
<d>0.28508911</d>
<d>0.28571429</d>
<d>0.28749976</d>
<d>0.28888952</d>
<d>0.28947283</d>
<d>0.290154</d>
<d>0.29032283</d>
<d>0.29032327</d>
<d>0.29166667</d>
<d>0.29385905</d>
<d>0.29444539</d>
<d>0.29493138</d>
<d>0.29533564</d>
<d>0.29569991</d>
<d>0.29583357</d>
<d>0.29824526</d>
<d>0.29953993</d>
<d>0.30000047</d>
<d>0.30000126</d>
<d>0.30051728</d>
<d>0.30107349</d>
<d>0.30263148</d>
<d>0.30414586</d>
<d>0.30416738</d>
<d>0.30555714</d>
<d>0.30569892</d>
<d>0.30645013</d>
<d>0.3070177</d>
<d>0.30833428</d>
<d>0.30875441</d>
<d>0.31088055</d>
<d>0.31110985</d>
<d>0.31140391</d>
<d>0.31182677</d>
<d>0.31250119</d>
<d>0.31336296</d>
<d>0.31579013</d>
<d>0.31606219</d>
<d>0.31666572</d>
<d>0.31666572</d>
<d>0.31720341</d>
<d>0.3179715</d>
<d>0.32017635</d>
<d>0.32083262</d>
<d>0.32124383</d>
<d>0.32222159</d>
<d>0.32258005</d>
<d>0.32258005</d>
<d>0.32456256</d>
<d>0.32499953</d>
<d>0.32642547</d>
<d>0.3271886</d>
<d>0.32777746</d>
<d>0.32795669</d>
<d>0.32894878</d>
<d>0.32916643</d>
<d>0.3316071</d>
<d>0.33179715</d>
<d>0.3333325</d>
<d>0.33333333</d>
<d>0.33333333</d>
<d>0.33333333</d>
<d>0.3364057</d>
<d>0.33678874</d>
<d>0.33750024</d>
<d>0.33771872</d>
<d>0.33870997</d>
<d>0.3388892</d>
<d>0.34101425</d>
<d>0.34166714</d>
<d>0.34196743</d>
<d>0.34210493</d>
<d>0.34408661</d>
<d>0.34444508</d>
<d>0.3456228</d>
<d>0.34583404</d>
<d>0.34649115</d>
<d>0.34714907</d>
<d>0.34946325</d>
<d>0.35000095</d>
<d>0.35000095</d>
<d>0.35022872</d>
<d>0.35087737</d>
<d>0.35233071</d>
<d>0.35416785</d>
<d>0.35483684</d>
<d>0.35483727</d>
<d>0.35526358</d>
<d>0.35555682</d>
<d>0.35751234</d>
<d>0.35833239</d>
<d>0.35944582</d>
<d>0.3596498</d>
<d>0.36021348</d>
<d>0.36111269</d>
<d>0.36249929</d>
<d>0.36269398</d>
<d>0.36403602</d>
<d>0.36405437</d>
<d>0.36559012</d>
<d>0.3666654</d>
<d>0.36666619</d>
<d>0.36787562</d>
<d>0.36842223</d>
<d>0.36866292</d>
<d>0.3708331</d>
<d>0.37096676</d>
<d>0.37222127</d>
<d>0.37280845</d>
<d>0.37305725</d>
<d>0.37327147</d>
<d>0.375</d>
<d>0.3763434</d>
<d>0.37719217</d>
<d>0.37777715</d>
<d>0.37788002</d>
<d>0.37823889</d>
<d>0.3791669</d>
<d>0.38157839</d>
<d>0.38172004</d>
<d>0.38248856</d>
<d>0.38333302</d>
<d>0.38333381</d>
<d>0.38342053</d>
<d>0.38596461</d>
<d>0.38709668</d>
<d>0.38709711</d>
<d>0.38750071</d>
<d>0.38860217</d>
<d>0.38888889</d>
<d>0.39035082</d>
<d>0.39166761</d>
<d>0.39170566</d>
<d>0.39247332</d>
<d>0.39378086</d>
<d>0.39444476</d>
<d>0.39473704</d>
<d>0.39583452</d>
<d>0.39631159</d>
<d>0.39784996</d>
<d>0.39896249</d>
<d>0.39912326</d>
<d>0.40000063</d>
<d>0.40000142</d>
<d>0.40092014</d>
<d>0.4032266</d>
<d>0.40350947</d>
<d>0.40414413</d>
<d>0.40416596</d>
<d>0.40552869</d>
<d>0.4055565</d>
<d>0.40789569</d>
<d>0.40833286</d>
<d>0.40860018</d>
<d>0.40932577</d>
<d>0.41013723</d>
<d>0.41111238</d>
<d>0.41228191</d>
<d>0.41249976</d>
<d>0.41397682</d>
<d>0.41450741</d>
<d>0.41474578</d>
<d>0.41666667</d>
<d>0.41666812</d>
<d>0.41666825</d>
<d>0.41935346</d>
<d>0.41935433</d>
<d>0.41968904</d>
<d>0.42083357</d>
<d>0.42105434</d>
<d>0.42222096</d>
<d>0.42396288</d>
<d>0.4247301</d>
<d>0.42487068</d>
<d>0.42500047</d>
<d>0.42543806</d>
<d>0.42777683</d>
<d>0.42857143</d>
<d>0.42916738</d>
<d>0.42982428</d>
<d>0.43005232</d>
<d>0.43010674</d>
<d>0.43317998</d>
<d>0.4333327</d>
<d>0.43333428</d>
<d>0.43421049</d>
<d>0.43523395</d>
<d>0.43548338</d>
<d>0.43750119</d>
<d>0.43778853</d>
<d>0.43859671</d>
<d>0.43888857</d>
<d>0.44041559</d>
<d>0.44086002</d>
<d>0.44166809</d>
<d>0.44239707</d>
<d>0.44298293</d>
<d>0.44444444</d>
<d>0.44559428</d>
<d>0.44583262</d>
<d>0.44623666</d>
<d>0.447003</d>
<d>0.44736914</d>
<d>0.44999953</d>
<d>0.45000032</d>
<d>0.45077592</d>
<d>0.45161155</d>
<d>0.4516133</d>
<d>0.45175536</d>
<d>0.45416643</d>
<d>0.45555619</d>
<d>0.45595756</d>
<d>0.45614158</d>
<d>0.4562201</d>
<d>0.45698994</d>
<d>0.45833333</d>
<d>0.46052779</d>
<d>0.46082865</d>
<d>0.46111206</d>
<d>0.46113919</d>
<d>0.46236352</d>
<d>0.46250024</d>
<d>0.46491401</d>
<d>0.4654372</d>
<d>0.46632083</d>
<d>0.46666714</d>
<d>0.46666793</d>
<d>0.46774016</d>
<d>0.46929773</d>
<d>0.47004574</d>
<d>0.47083404</d>
<d>0.47150247</d>
<d>0.4722238</d>
<d>0.4731168</d>
<d>0.47368395</d>
<d>0.47465429</d>
<d>0.47500095</d>
<d>0.47668411</d>
<d>0.47777651</d>
<d>0.47807016</d>
<d>0.47849344</d>
<d>0.47916785</d>
<d>0.47926284</d>
<d>0.48186574</d>
<d>0.48245638</d>
<d>0.48333239</d>
<d>0.48333476</d>
<d>0.48387008</d>
<d>0.48387139</d>
<d>0.4868426</d>
<d>0.48704738</d>
<d>0.48749929</d>
<d>0.48847994</d>
<d>0.48888826</d>
<d>0.48924672</d>
<d>0.49122881</d>
<d>0.49166619</d>
<d>0.49222902</d>
<d>0.49308587</d>
<d>0.49444413</d>
<d>0.49462336</d>
<d>0.49561503</d>
<d>0.4958331</d>
<d>0.49741066</d>
<d>0.49769441</d>
<d>0.5</d>
<d>0.5</d>
<d>0.5</d>
<d>0.50000125</d>
<d>0.50230296</d>
<d>0.50258934</d>
<d>0.5041669</d>
<d>0.50438746</d>
<d>0.50537664</d>
<d>0.50555587</d>
<d>0.50691151</d>
<d>0.50777098</d>
<d>0.50833381</d>
<d>0.50877368</d>
<d>0.51075328</d>
<d>0.51111174</d>
<d>0.51152006</d>
<d>0.51250071</d>
<d>0.51295262</d>
<d>0.5131574</d>
<d>0.51612861</d>
<d>0.51612992</d>
<d>0.51666761</d>
<d>0.51666761</d>
<d>0.51754362</d>
<d>0.51813426</d>
<d>0.52073716</d>
<d>0.52083452</d>
<d>0.5215035</d>
<d>0.52192984</d>
<d>0.52222349</d>
<d>0.52331589</d>
<d>0.52500142</d>
<d>0.52534571</d>
<d>0.52631605</d>
<d>0.52688014</d>
<d>0.52777936</d>
<d>0.52849753</d>
<d>0.52916596</d>
<d>0.52995426</d>
<d>0.53070227</d>
<d>0.53225678</d>
<d>0.53333286</d>
<d>0.53333523</d>
<d>0.53367917</d>
<d>0.5345628</d>
<d>0.53508849</d>
<d>0.53749976</d>
<d>0.53763342</d>
<d>0.53886081</d>
<d>0.53888794</d>
<d>0.53916873</d>
<d>0.5394747</d>
<d>0.54166667</d>
<d>0.54301006</d>
<d>0.54377728</d>
<d>0.54386092</d>
<d>0.54404244</d>
<d>0.54444381</d>
<d>0.54583357</d>
<d>0.54824714</d>
<d>0.54838583</d>
<d>0.5483867</d>
<d>0.54922408</d>
<d>0.54999968</d>
<d>0.55000047</d>
<d>0.55263335</d>
<d>0.55299438</d>
<d>0.55376334</d>
<d>0.55416738</d>
<d>0.55440277</d>
<d>0.55555556</d>
<d>0.55701707</d>
<d>0.55760293</d>
<d>0.55833428</d>
<d>0.55913998</d>
<d>0.55958441</d>
<d>0.56111143</d>
<d>0.56140329</d>
<d>0.56221147</d>
<d>0.56250119</d>
<d>0.56451662</d>
<d>0.56476605</d>
<d>0.56578951</d>
<d>0.5666673</d>
<d>0.56666809</d>
<d>0.56682002</d>
<d>0.56989326</d>
<d>0.56994768</d>
<d>0.57017572</d>
<d>0.57083262</d>
<d>0.57142857</d>
<d>0.57222317</d>
<d>0.57456194</d>
<d>0.57499953</d>
<d>0.57512932</d>
<d>0.57526684</d>
<d>0.57603712</d>
<d>0.57777904</d>
<d>0.57894816</d>
<d>0.57916643</d>
<d>0.58031096</d>
<d>0.58064348</d>
<d>0.58064567</d>
<d>0.58333333</d>
<d>0.58333437</d>
<d>0.58333491</d>
<d>0.5852516</d>
<d>0.58549259</d>
<d>0.58602012</d>
<d>0.58750024</d>
<d>0.58772059</d>
<d>0.58889079</d>
<d>0.58986014</d>
<d>0.59067423</d>
<d>0.59139676</d>
<d>0.59166714</d>
<d>0.59210681</d>
<d>0.5944435</d>
<d>0.59446869</d>
<d>0.59583404</d>
<d>0.59585587</d>
<d>0.59649302</d>
<d>0.5967734</d>
<d>0.59907724</d>
<d>0.59999937</d>
<d>0.60000095</d>
<d>0.60087674</d>
<d>0.60103751</d>
<d>0.60215004</d>
<d>0.60368579</d>
<d>0.60416785</d>
<d>0.60526296</d>
<d>0.60555524</d>
<d>0.6062162</d>
<d>0.60752668</d>
<d>0.60829434</d>
<d>0.60833476</d>
<d>0.60964918</d>
<d>0.61111111</d>
<d>0.61139783</d>
<d>0.61249929</d>
<d>0.61290289</d>
<d>0.61290332</d>
<d>0.61403539</d>
<d>0.61657947</d>
<d>0.61666619</d>
<d>0.61666698</d>
<d>0.61751144</d>
<d>0.61827996</d>
<d>0.61842161</d>
<d>0.6208331</d>
<d>0.62176111</d>
<d>0.62211998</d>
<d>0.62222285</d>
<d>0.62280783</d>
<d>0.6236566</d>
<d>0.625</d>
<d>0.62672853</d>
<d>0.62694275</d>
<d>0.62719404</d>
<d>0.62777873</d>
<d>0.62903019</d>
<d>0.6291669</d>
<d>0.63133446</d>
<d>0.63158026</d>
<d>0.63212438</d>
<d>0.63333381</d>
<d>0.6333346</d>
<d>0.63440683</d>
<d>0.63594301</d>
<d>0.63596648</d>
<d>0.63730602</d>
<d>0.63750071</d>
<d>0.63889047</d>
<d>0.63978347</d>
<d>0.64035269</d>
<d>0.64055156</d>
<d>0.64166761</d>
<d>0.64248766</d>
<d>0.64444634</d>
<d>0.64473642</d>
<d>0.64516011</d>
<d>0.64516011</d>
<d>0.64583452</d>
<d>0.64766929</d>
<d>0.64912263</d>
<d>0.64976866</d>
<d>0.64999905</d>
<d>0.65000142</d>
<d>0.65053675</d>
<d>0.65285093</d>
<d>0.65350885</d>
<d>0.65416596</d>
<d>0.6543772</d>
<d>0.65555492</d>
<d>0.65591339</d>
<d>0.65789507</d>
<d>0.65802962</d>
<d>0.65833286</d>
<d>0.65898575</d>
<d>0.6611108</d>
<d>0.66129003</d>
<d>0.66228128</d>
<d>0.66249976</d>
<d>0.66321126</d>
<d>0.6635943</d>
<d>0.66666667</d>
<d>0.66666667</d>
<d>0.66666667</d>
<d>0.6666675</d>
<d>0.66820285</d>
<d>0.6683929</d>
<d>0.67083357</d>
<d>0.67105371</d>
<d>0.67204331</d>
<d>0.67222254</d>
<d>0.6728114</d>
<d>0.67357453</d>
<d>0.67500047</d>
<d>0.67543993</d>
<d>0.67741733</d>
<d>0.67741995</d>
<d>0.67777841</d>
<d>0.67875617</d>
<d>0.67916738</d>
<d>0.67982615</d>
<d>0.68202587</d>
<d>0.68279353</d>
<d>0.68333428</d>
<d>0.68333428</d>
<d>0.68393781</d>
<d>0.68421236</d>
<d>0.68663442</d>
<d>0.68750119</d>
<d>0.68817017</d>
<d>0.68859609</d>
<d>0.68889015</d>
<d>0.68911945</d>
<d>0.69124297</d>
<d>0.69166809</d>
<d>0.6929823</d>
<d>0.69354681</d>
<d>0.69430108</d>
<d>0.69444602</d>
<d>0.69583262</d>
<d>0.69585152</d>
<d>0.69736852</d>
<d>0.69892345</d>
<d>0.69948272</d>
<d>0.69999953</d>
<d>0.7000019</d>
<d>0.70046007</d>
<d>0.70175474</d>
<d>0.70416643</d>
<d>0.70430009</d>
<d>0.70466436</d>
<d>0.70506862</d>
<d>0.70555461</d>
<d>0.70614095</d>
<d>0.70833333</d>
<d>0.70967673</d>
<d>0.70967717</d>
<d>0.70984305</d>
<d>0.71052717</d>
<d>0.71111048</d>
<d>0.71250024</d>
<d>0.71428571</d>
<d>0.71491339</d>
<d>0.71502468</d>
<d>0.71505337</d>
<d>0.71666635</d>
<d>0.71666714</d>
<d>0.71889426</d>
<d>0.7192996</d>
<d>0.72020632</d>
<d>0.72043001</d>
<d>0.72083404</d>
<d>0.72222222</d>
<d>0.72350019</d>
<d>0.72368582</d>
<d>0.72500095</d>
<d>0.72538796</d>
<d>0.72580665</d>
<d>0.72777809</d>
<d>0.72807204</d>
<d>0.72810874</d>
<d>0.72916785</d>
<d>0.7305696</d>
<d>0.73118329</d>
<d>0.73245576</d>
<d>0.73271729</d>
<d>0.73333397</d>
<d>0.73333476</d>
<d>0.73575123</d>
<d>0.73655687</d>
<d>0.73684197</d>
<d>0.73732584</d>
<d>0.73749929</d>
<d>0.73888984</d>
<d>0.74093287</d>
<d>0.74122819</d>
<d>0.74166619</d>
<d>0.74193351</d>
<d>0.74193438</d>
<d>0.74444571</d>
<d>0.74561441</d>
<d>0.7458331</d>
<d>0.74611451</d>
<d>0.74654293</d>
<d>0.74731015</d>
<d>0.75</d>
<d>0.75000062</d>
<d>0.75000158</d>
<d>0.75115148</d>
<d>0.75129615</d>
<d>0.75268679</d>
<d>0.7541669</d>
<d>0.75438684</d>
<d>0.75555745</d>
<d>0.75576003</d>
<d>0.75647778</d>
<d>0.75806343</d>
<d>0.75833381</d>
<d>0.75877306</d>
<d>0.76036858</d>
<d>0.76111016</d>
<d>0.76165647</d>
<d>0.76250071</d>
<d>0.76315927</d>
<d>0.76344007</d>
<d>0.76497713</d>
<d>0.76666603</d>
<d>0.76666761</d>
<d>0.76683811</d>
<d>0.76754549</d>
<d>0.76881671</d>
<d>0.76958305</d>
<d>0.77083452</d>
<d>0.77193171</d>
<d>0.77201975</d>
<d>0.77222191</d>
<d>0.7741916</d>
<d>0.77419335</d>
<d>0.77500142</d>
<d>0.77631543</d>
<d>0.77720139</d>
<d>0.77777778</d>
<d>0.77880015</d>
<d>0.77916596</d>
<d>0.77956999</d>
<d>0.78070164</d>
<d>0.78238302</d>
<d>0.78333286</d>
<d>0.78333365</d>
<d>0.7834087</d>
<d>0.78494663</d>
<d>0.78508786</d>
<d>0.78749976</d>
<d>0.78756466</d>
<d>0.78801725</d>
<d>0.78888952</d>
<d>0.78947408</d>
<d>0.79032021</d>
<d>0.79166667</d>
<d>0.7926258</d>
<d>0.7927463</d>
<d>0.79386029</d>
<d>0.79444539</d>
<d>0.79569685</d>
<d>0.79583357</d>
<d>0.79723435</d>
<d>0.79792793</d>
<d>0.79824651</d>
<d>0.80000047</d>
<d>0.80000126</d>
<d>0.80107349</d>
<d>0.8018429</d>
<d>0.80263273</d>
<d>0.80310957</d>
<d>0.80416738</d>
<d>0.80555714</d>
<d>0.80645013</d>
<d>0.80645144</d>
<d>0.80701894</d>
<d>0.80829121</d>
<d>0.80833428</d>
<d>0.81105999</d>
<d>0.81111301</d>
<d>0.81140516</d>
<d>0.81182677</d>
<d>0.81250119</d>
<d>0.8134699</d>
<d>0.81566592</d>
<d>0.81579138</d>
<d>0.81666572</d>
<d>0.81666809</d>
<d>0.81720341</d>
<d>0.81865154</d>
<d>0.8201751</d>
<d>0.82027447</d>
<d>0.82083262</d>
<d>0.82222159</d>
<d>0.82258005</d>
<d>0.82383317</d>
<d>0.82456132</d>
<d>0.82488302</d>
<d>0.82499953</d>
<d>0.82777746</d>
<d>0.82795669</d>
<d>0.82894753</d>
<d>0.82901481</d>
<d>0.82916643</d>
<d>0.82949157</d>
<d>0.83333333</d>
<d>0.83333333</d>
<d>0.83333333</d>
<d>0.83333375</d>
<d>0.83410011</d>
<d>0.83419645</d>
<d>0.83750024</d>
<d>0.83771997</d>
<d>0.83870866</d>
<d>0.83870997</d>
<d>0.8388892</d>
<d>0.83937809</d>
<d>0.84166714</d>
<d>0.84210618</d>
<d>0.84331721</d>
<d>0.84408356</d>
<d>0.84444508</d>
<d>0.84455972</d>
<d>0.84583404</d>
<d>0.8464924</d>
<d>0.84792576</d>
<d>0.8494602</d>
<d>0.84974136</d>
<d>0.85000095</d>
<d>0.85000095</d>
<d>0.85087862</d>
<d>0.85253431</d>
<d>0.85416785</d>
<d>0.85483684</d>
<d>0.854923</d>
<d>0.85526483</d>
<d>0.85555682</d>
<d>0.85714286</d>
<d>0.85833476</d>
<d>0.85965105</d>
<d>0.86010463</d>
<d>0.86021348</d>
<d>0.86111269</d>
<d>0.86174878</d>
<d>0.86250166</d>
<d>0.86403477</d>
<d>0.86528332</d>
<d>0.86559012</d>
<d>0.86635733</d>
<d>0.86666619</d>
<d>0.86666856</d>
<d>0.86842099</d>
<d>0.87046496</d>
<d>0.8708331</d>
<d>0.87096588</d>
<d>0.87096676</d>
<d>0.87222127</d>
<d>0.8728072</d>
<d>0.875</d>
<d>0.87557443</d>
<d>0.8756466</d>
<d>0.8763434</d>
<d>0.87719342</d>
<d>0.87777715</d>
<d>0.8791669</d>
<d>0.88018298</d>
<d>0.88082824</d>
<d>0.88157964</d>
<d>0.88172004</d>
<d>0.88333302</d>
<d>0.88333381</d>
<d>0.88479153</d>
<d>0.88596585</d>
<d>0.88600987</d>
<d>0.88709668</d>
<d>0.88750071</d>
<d>0.88888889</d>
<d>0.88940008</d>
<d>0.89035207</d>
<d>0.89119151</d>
<d>0.89166761</d>
<d>0.89247332</d>
<d>0.89400862</d>
<d>0.89444476</d>
<d>0.89473829</d>
<d>0.89583452</d>
<d>0.89637315</d>
<d>0.8978469</d>
<d>0.89861717</d>
<d>0.8991245</d>
<d>0.90000063</d>
<d>0.90000142</d>
<d>0.90155479</d>
<d>0.90322354</d>
<d>0.90322572</d>
<d>0.90351072</d>
<d>0.90416833</d>
<d>0.9055565</d>
<d>0.90673642</d>
<d>0.90783165</d>
<d>0.90789694</d>
<d>0.90833286</d>
<d>0.90860018</d>
<d>0.91111238</d>
<d>0.91191806</d>
<d>0.91228066</d>
<d>0.9124402</d>
<d>0.91249976</d>
<d>0.91397682</d>
<d>0.91666667</d>
<d>0.91666687</d>
<d>0.91666825</d>
<d>0.91704875</d>
<d>0.91709675</d>
<d>0.91935346</d>
<d>0.92083357</d>
<d>0.92105309</d>
<d>0.92165729</d>
<d>0.92222412</d>
<d>0.92227839</d>
<d>0.9247301</d>
<d>0.92500047</d>
<d>0.92543931</d>
<d>0.92626584</d>
<d>0.92746003</d>
<d>0.92777683</d>
<d>0.92916738</d>
<d>0.92982552</d>
<d>0.93010674</d>
<d>0.93087439</d>
<d>0.93264166</d>
<d>0.9333327</d>
<d>0.93333428</d>
<d>0.93421174</d>
<d>0.93548294</d>
<d>0.93548338</d>
<d>0.93750119</d>
<d>0.9378233</d>
<d>0.93859796</d>
<d>0.93888857</d>
<d>0.94009149</d>
<d>0.94086002</d>
<d>0.94166809</d>
<d>0.94298417</d>
<d>0.94300494</d>
<d>0.94444444</d>
<d>0.94470004</d>
<d>0.94583499</d>
<d>0.94623666</d>
<d>0.94737039</d>
<d>0.94818657</d>
<d>0.94930859</d>
<d>0.94999953</d>
<d>0.95000032</d>
<d>0.95161024</d>
<d>0.95175661</d>
<d>0.95336821</d>
<d>0.95391714</d>
<d>0.95416643</d>
<d>0.95555619</d>
<d>0.95614033</d>
<d>0.95698688</d>
<d>0.95833333</d>
<d>0.95852306</d>
<d>0.95854985</d>
<d>0.96052655</d>
<d>0.96111206</d>
<d>0.96236352</d>
<d>0.96250024</d>
<d>0.96313161</d>
<d>0.96373149</d>
<d>0.96491276</d>
<d>0.96666714</d>
<d>0.96666793</d>
<d>0.96774016</d>
<d>0.96774016</d>
<d>0.96891018</d>
<d>0.96929898</d>
<d>0.97083404</d>
<d>0.9722238</d>
<d>0.97234871</d>
<d>0.9731168</d>
<d>0.9736852</d>
<d>0.97409181</d>
<d>0.97500095</d>
<d>0.97695726</d>
<d>0.97777967</d>
<d>0.97807141</d>
<d>0.97849344</d>
<d>0.97916785</d>
<d>0.97927345</d>
<d>0.98156581</d>
<d>0.98245763</d>
<d>0.98333239</d>
<d>0.98333476</d>
<d>0.98387008</d>
<d>0.98445509</d>
<d>0.98617435</d>
<d>0.98684385</d>
<d>0.98750166</d>
<d>0.98888826</d>
<d>0.98924672</d>
<d>0.98963673</d>
<d>0.9907829</d>
<d>0.99123006</d>
<d>0.99166619</d>
<d>0.99444413</d>
<d>0.99462336</d>
<d>0.99481836</d>
<d>0.99539145</d>
<d>0.99561628</d>
<d>0.9958331</d>
<d>1</d>
<d>1</d>
<d>1</d>
<d>1</d>
<d>1</d>
<d>1</d>
</Subcolumn>
</XColumn>
<XAdvancedColumn Version="1" Width="77" Decimals="8" Subcolumns="1">
<Title></Title>
<Subcolumn>
<d>0</d>
<d>0</d>
<d>0</d>
<d>0</d>
<d>0</d>
<d>0</d>
<d>0.0041669</d>
<d>0.00438622</d>
<d>0.00460855</d>
<d>0.00518164</d>
<d>0.00537664</d>
<d>0.00555587</d>
<d>0.00833381</d>
<d>0.00877243</d>
<d>0.0092171</d>
<d>0.01036327</d>
<d>0.01075328</d>
<d>0.01111174</d>
<d>0.01250071</d>
<d>0.01315865</d>
<d>0.01382565</d>
<d>0.01554491</d>
<d>0.01612992</d>
<d>0.01666761</d>
<d>0.01666761</d>
<d>0.01754487</d>
<d>0.01843419</d>
<d>0.02072655</d>
<d>0.02083452</d>
<d>0.02150656</d>
<d>0.02193108</d>
<d>0.02222349</d>
<d>0.02304274</d>
<d>0.02499905</d>
<d>0.02590819</d>
<d>0.0263148</d>
<d>0.0268832</d>
<d>0.02764867</d>
<d>0.02777936</d>
<d>0.02916596</d>
<d>0.03070102</d>
<d>0.03108688</d>
<d>0.03225678</d>
<d>0.03225722</d>
<d>0.03333207</d>
<d>0.03333286</d>
<d>0.03508724</d>
<d>0.03626851</d>
<d>0.03686577</d>
<d>0.03749976</d>
<d>0.03763342</d>
<d>0.03888794</d>
<d>0.03947345</d>
<d>0.04145015</d>
<d>0.04147432</d>
<d>0.04166667</d>
<d>0.04301006</d>
<d>0.04385967</d>
<d>0.04444381</d>
<d>0.04583357</d>
<d>0.04608286</d>
<d>0.04663179</d>
<d>0.04824589</d>
<d>0.0483867</d>
<d>0.04999968</d>
<d>0.05000047</d>
<d>0.05069141</d>
<d>0.05181343</d>
<d>0.0526321</d>
<d>0.05376334</d>
<d>0.05416738</d>
<d>0.05529996</d>
<d>0.05555556</d>
<d>0.05699506</d>
<d>0.05701832</d>
<d>0.05833428</d>
<d>0.05913998</d>
<d>0.05990851</d>
<d>0.06111143</d>
<d>0.06140454</d>
<d>0.0621767</d>
<d>0.06250119</d>
<d>0.06451662</d>
<d>0.06451706</d>
<d>0.06579075</d>
<d>0.06666572</d>
<d>0.0666673</d>
<d>0.06735834</d>
<d>0.06912561</d>
<d>0.06989326</d>
<d>0.07017448</d>
<d>0.07083262</d>
<d>0.07222317</d>
<d>0.07253997</d>
<d>0.07373154</d>
<d>0.07456069</d>
<d>0.07499953</d>
<d>0.0752699</d>
<d>0.07772161</d>
<d>0.07777904</d>
<d>0.07834008</d>
<d>0.07894691</d>
<d>0.07916643</d>
<d>0.08064654</d>
<d>0.0829003</d>
<d>0.08294863</d>
<d>0.08333313</d>
<d>0.08333333</d>
<d>0.08333491</d>
<d>0.08602012</d>
<d>0.08750024</d>
<d>0.08755718</d>
<d>0.08771934</d>
<d>0.08808194</d>
<d>0.08888762</d>
<d>0.09139676</d>
<d>0.09166714</d>
<d>0.09210556</d>
<d>0.09216573</d>
<d>0.09326358</d>
<d>0.0944435</d>
<d>0.09583404</d>
<d>0.09649178</d>
<d>0.0967734</d>
<d>0.09677428</d>
<d>0.09844521</d>
<d>0.09999937</d>
<d>0.10000095</d>
<d>0.10087799</d>
<d>0.10138283</d>
<d>0.10215004</d>
<d>0.10362685</d>
<d>0.10416785</d>
<d>0.10526421</d>
<d>0.10555524</d>
<d>0.10599138</d>
<d>0.10752668</d>
<d>0.10833239</d>
<d>0.10880849</d>
<d>0.10965043</d>
<d>0.11059992</d>
<d>0.11111111</d>
<d>0.11249929</d>
<d>0.11290332</d>
<d>0.11399013</d>
<d>0.11403415</d>
<d>0.11520847</d>
<d>0.11666619</d>
<d>0.11666698</d>
<d>0.11827996</d>
<d>0.11842036</d>
<d>0.11917176</d>
<d>0.1198144</d>
<d>0.1208331</d>
<d>0.12222285</d>
<d>0.12280658</d>
<d>0.1236566</d>
<d>0.1243534</d>
<d>0.12442295</d>
<d>0.125</d>
<d>0.1271928</d>
<d>0.12777873</d>
<d>0.1290315</d>
<d>0.12903324</d>
<d>0.1291669</d>
<d>0.12953504</d>
<d>0.13157901</d>
<d>0.13333381</d>
<d>0.1333346</d>
<d>0.13364005</d>
<d>0.13440988</d>
<d>0.13471373</d>
<d>0.13596523</d>
<d>0.13750071</d>
<d>0.13824859</d>
<d>0.13889047</d>
<d>0.13978347</d>
<d>0.13989537</d>
<d>0.14035145</d>
<d>0.14166761</d>
<d>0.14285714</d>
<d>0.14444318</d>
<d>0.14473766</d>
<d>0.145077</d>
<d>0.14516011</d>
<d>0.14583452</d>
<d>0.14746569</d>
<d>0.14912388</d>
<d>0.14999905</d>
<d>0.14999905</d>
<d>0.15025864</d>
<d>0.15053675</d>
<d>0.15207424</d>
<d>0.1535101</d>
<d>0.15416596</d>
<d>0.15544028</d>
<d>0.15555492</d>
<d>0.15591339</d>
<d>0.15668279</d>
<d>0.15789382</d>
<d>0.15833286</d>
<d>0.16062191</d>
<d>0.1611108</d>
<d>0.16129003</d>
<d>0.16129134</d>
<d>0.16228003</d>
<d>0.16249976</d>
<d>0.16580355</d>
<d>0.16589726</d>
<d>0.16666625</d>
<d>0.16666667</d>
<d>0.16666667</d>
<d>0.16666667</d>
<d>0.17050581</d>
<d>0.17083357</d>
<d>0.17098519</d>
<d>0.17105247</d>
<d>0.17204331</d>
<d>0.17222254</d>
<d>0.17500047</d>
<d>0.17511436</d>
<d>0.17543868</d>
<d>0.17616683</d>
<d>0.17741995</d>
<d>0.17777841</d>
<d>0.17916738</d>
<d>0.17972291</d>
<d>0.1798249</d>
<d>0.18134846</d>
<d>0.18279659</d>
<d>0.18333428</d>
<d>0.18333428</d>
<d>0.18421112</d>
<d>0.18433146</d>
<d>0.18652715</d>
<d>0.18750119</d>
<d>0.18817323</d>
<d>0.18859733</d>
<d>0.18889015</d>
<d>0.18894001</d>
<d>0.19166572</d>
<d>0.19170879</d>
<d>0.19298355</d>
<d>0.19354681</d>
<d>0.19354856</d>
<d>0.19444602</d>
<d>0.19583262</d>
<d>0.19689043</d>
<d>0.19736977</d>
<d>0.1981571</d>
<d>0.19892345</d>
<d>0.19999874</d>
<d>0.19999953</d>
<d>0.20175349</d>
<d>0.20207207</d>
<d>0.20276565</d>
<d>0.20416643</d>
<d>0.20430009</d>
<d>0.20555461</d>
<d>0.20613971</d>
<d>0.2072537</d>
<d>0.2073742</d>
<d>0.20833333</d>
<d>0.20967673</d>
<d>0.21052592</d>
<d>0.21111048</d>
<d>0.21198013</d>
<d>0.21243534</d>
<d>0.21250024</d>
<d>0.21491214</d>
<d>0.21505337</d>
<d>0.21658868</d>
<d>0.21666635</d>
<d>0.21666714</d>
<d>0.21761698</d>
<d>0.21929836</d>
<d>0.22043001</d>
<d>0.22083404</d>
<d>0.22119723</d>
<d>0.22222222</d>
<d>0.22279861</d>
<d>0.22368457</d>
<d>0.22500095</d>
<d>0.22580578</d>
<d>0.22580665</d>
<d>0.22777809</d>
<d>0.22798025</d>
<d>0.22807079</d>
<d>0.22916785</d>
<d>0.23041432</d>
<d>0.23118329</d>
<d>0.232457</d>
<d>0.23316189</d>
<d>0.23333239</d>
<d>0.23333397</d>
<d>0.23502287</d>
<d>0.23655993</d>
<d>0.23684322</d>
<d>0.23749929</d>
<d>0.23834058</d>
<d>0.23888984</d>
<d>0.23963142</d>
<d>0.24122944</d>
<d>0.24166619</d>
<d>0.24193657</d>
<d>0.24352222</d>
<d>0.24423997</d>
<d>0.24444571</d>
<d>0.24561316</d>
<d>0.2458331</d>
<d>0.24731015</d>
<d>0.24870385</d>
<d>0.24884852</d>
<d>0.24999938</d>
<d>0.25</d>
<d>0.25000158</d>
<d>0.25268679</d>
<d>0.25345707</d>
<d>0.25388549</d>
<d>0.2541669</d>
<d>0.25438559</d>
<d>0.25555429</d>
<d>0.25806299</d>
<d>0.25806343</d>
<d>0.25833381</d>
<d>0.25877181</d>
<d>0.25906713</d>
<d>0.26111016</d>
<d>0.26250071</d>
<d>0.26267154</d>
<d>0.26315803</d>
<d>0.26344007</d>
<d>0.26424877</d>
<d>0.26666603</d>
<d>0.26666761</d>
<d>0.26728009</d>
<d>0.26754424</d>
<d>0.26881671</d>
<d>0.2694304</d>
<d>0.27083452</d>
<d>0.27188864</d>
<d>0.27193046</d>
<d>0.27222191</d>
<d>0.27419335</d>
<d>0.27461204</d>
<d>0.27499905</d>
<d>0.27631668</d>
<d>0.27649719</d>
<d>0.27777778</d>
<d>0.27916596</d>
<d>0.27956999</d>
<d>0.27979368</d>
<d>0.28070289</d>
<d>0.28110574</d>
<d>0.28333286</d>
<d>0.28333365</d>
<d>0.28494663</d>
<d>0.28497532</d>
<d>0.28508911</d>
<d>0.28571429</d>
<d>0.28749976</d>
<d>0.28888952</d>
<d>0.28947283</d>
<d>0.290154</d>
<d>0.29032283</d>
<d>0.29032327</d>
<d>0.29166667</d>
<d>0.29385905</d>
<d>0.29444539</d>
<d>0.29493138</d>
<d>0.29533564</d>
<d>0.29569991</d>
<d>0.29583357</d>
<d>0.29824526</d>
<d>0.29953993</d>
<d>0.30000047</d>
<d>0.30000126</d>
<d>0.30051728</d>
<d>0.30107349</d>
<d>0.30263148</d>
<d>0.30414586</d>
<d>0.30416738</d>
<d>0.30555714</d>
<d>0.30569892</d>
<d>0.30645013</d>
<d>0.3070177</d>
<d>0.30833428</d>
<d>0.30875441</d>
<d>0.31088055</d>
<d>0.31110985</d>
<d>0.31140391</d>
<d>0.31182677</d>
<d>0.31250119</d>
<d>0.31336296</d>
<d>0.31579013</d>
<d>0.31606219</d>
<d>0.31666572</d>
<d>0.31666572</d>
<d>0.31720341</d>
<d>0.3179715</d>
<d>0.32017635</d>
<d>0.32083262</d>
<d>0.32124383</d>
<d>0.32222159</d>
<d>0.32258005</d>
<d>0.32258005</d>
<d>0.32456256</d>
<d>0.32499953</d>
<d>0.32642547</d>
<d>0.3271886</d>
<d>0.32777746</d>
<d>0.32795669</d>
<d>0.32894878</d>
<d>0.32916643</d>
<d>0.3316071</d>
<d>0.33179715</d>
<d>0.3333325</d>
<d>0.33333333</d>
<d>0.33333333</d>
<d>0.33333333</d>
<d>0.3364057</d>
<d>0.33678874</d>
<d>0.33750024</d>
<d>0.33771872</d>
<d>0.33870997</d>
<d>0.3388892</d>
<d>0.34101425</d>
<d>0.34166714</d>
<d>0.34196743</d>
<d>0.34210493</d>
<d>0.34408661</d>
<d>0.34444508</d>
<d>0.3456228</d>
<d>0.34583404</d>
<d>0.34649115</d>
<d>0.34714907</d>
<d>0.34946325</d>
<d>0.35000095</d>
<d>0.35000095</d>
<d>0.35022872</d>
<d>0.35087737</d>
<d>0.35233071</d>
<d>0.35416785</d>
<d>0.35483684</d>
<d>0.35483727</d>
<d>0.35526358</d>
<d>0.35555682</d>
<d>0.35751234</d>
<d>0.35833239</d>
<d>0.35944582</d>
<d>0.3596498</d>
<d>0.36021348</d>
<d>0.36111269</d>
<d>0.36249929</d>
<d>0.36269398</d>
<d>0.36403602</d>
<d>0.36405437</d>
<d>0.36559012</d>
<d>0.3666654</d>
<d>0.36666619</d>
<d>0.36787562</d>
<d>0.36842223</d>
<d>0.36866292</d>
<d>0.3708331</d>
<d>0.37096676</d>
<d>0.37222127</d>
<d>0.37280845</d>
<d>0.37305725</d>
<d>0.37327147</d>
<d>0.375</d>
<d>0.3763434</d>
<d>0.37719217</d>
<d>0.37777715</d>
<d>0.37788002</d>
<d>0.37823889</d>
<d>0.3791669</d>
<d>0.38157839</d>
<d>0.38172004</d>
<d>0.38248856</d>
<d>0.38333302</d>
<d>0.38333381</d>
<d>0.38342053</d>
<d>0.38596461</d>
<d>0.38709668</d>
<d>0.38709711</d>
<d>0.38750071</d>
<d>0.38860217</d>
<d>0.38888889</d>
<d>0.39035082</d>
<d>0.39166761</d>
<d>0.39170566</d>
<d>0.39247332</d>
<d>0.39378086</d>
<d>0.39444476</d>
<d>0.39473704</d>
<d>0.39583452</d>
<d>0.39631159</d>
<d>0.39784996</d>
<d>0.39896249</d>
<d>0.39912326</d>
<d>0.40000063</d>
<d>0.40000142</d>
<d>0.40092014</d>
<d>0.4032266</d>
<d>0.40350947</d>
<d>0.40414413</d>
<d>0.40416596</d>
<d>0.40552869</d>
<d>0.4055565</d>
<d>0.40789569</d>
<d>0.40833286</d>
<d>0.40860018</d>
<d>0.40932577</d>
<d>0.41013723</d>
<d>0.41111238</d>
<d>0.41228191</d>
<d>0.41249976</d>
<d>0.41397682</d>
<d>0.41450741</d>
<d>0.41474578</d>
<d>0.41666667</d>
<d>0.41666812</d>
<d>0.41666825</d>
<d>0.41935346</d>
<d>0.41935433</d>
<d>0.41968904</d>
<d>0.42083357</d>
<d>0.42105434</d>
<d>0.42222096</d>
<d>0.42396288</d>
<d>0.4247301</d>
<d>0.42487068</d>
<d>0.42500047</d>
<d>0.42543806</d>
<d>0.42777683</d>
<d>0.42857143</d>
<d>0.42916738</d>
<d>0.42982428</d>
<d>0.43005232</d>
<d>0.43010674</d>
<d>0.43317998</d>
<d>0.4333327</d>
<d>0.43333428</d>
<d>0.43421049</d>
<d>0.43523395</d>
<d>0.43548338</d>
<d>0.43750119</d>
<d>0.43778853</d>
<d>0.43859671</d>
<d>0.43888857</d>
<d>0.44041559</d>
<d>0.44086002</d>
<d>0.44166809</d>
<d>0.44239707</d>
<d>0.44298293</d>
<d>0.44444444</d>
<d>0.44559428</d>
<d>0.44583262</d>
<d>0.44623666</d>
<d>0.447003</d>
<d>0.44736914</d>
<d>0.44999953</d>
<d>0.45000032</d>
<d>0.45077592</d>
<d>0.45161155</d>
<d>0.4516133</d>
<d>0.45175536</d>
<d>0.45416643</d>
<d>0.45555619</d>
<d>0.45595756</d>
<d>0.45614158</d>
<d>0.4562201</d>
<d>0.45698994</d>
<d>0.45833333</d>
<d>0.46052779</d>
<d>0.46082865</d>
<d>0.46111206</d>
<d>0.46113919</d>
<d>0.46236352</d>
<d>0.46250024</d>
<d>0.46491401</d>
<d>0.4654372</d>
<d>0.46632083</d>
<d>0.46666714</d>
<d>0.46666793</d>
<d>0.46774016</d>
<d>0.46929773</d>
<d>0.47004574</d>
<d>0.47083404</d>
<d>0.47150247</d>
<d>0.4722238</d>
<d>0.4731168</d>
<d>0.47368395</d>
<d>0.47465429</d>
<d>0.47500095</d>
<d>0.47668411</d>
<d>0.47777651</d>
<d>0.47807016</d>
<d>0.47849344</d>
<d>0.47916785</d>
<d>0.47926284</d>
<d>0.48186574</d>
<d>0.48245638</d>
<d>0.48333239</d>
<d>0.48333476</d>
<d>0.48387008</d>
<d>0.48387139</d>
<d>0.4868426</d>
<d>0.48704738</d>
<d>0.48749929</d>
<d>0.48847994</d>
<d>0.48888826</d>
<d>0.48924672</d>
<d>0.49122881</d>
<d>0.49166619</d>
<d>0.49222902</d>
<d>0.49308587</d>
<d>0.49444413</d>
<d>0.49462336</d>
<d>0.49561503</d>
<d>0.4958331</d>
<d>0.49741066</d>
<d>0.49769441</d>
<d>0.5</d>
<d>0.5</d>
<d>0.5</d>
<d>0.50000125</d>
<d>0.50230296</d>
<d>0.50258934</d>
<d>0.5041669</d>
<d>0.50438746</d>
<d>0.50537664</d>
<d>0.50555587</d>
<d>0.50691151</d>
<d>0.50777098</d>
<d>0.50833381</d>
<d>0.50877368</d>
<d>0.51075328</d>
<d>0.51111174</d>
<d>0.51152006</d>
<d>0.51250071</d>
<d>0.51295262</d>
<d>0.5131574</d>
<d>0.51612861</d>
<d>0.51612992</d>
<d>0.51666761</d>
<d>0.51666761</d>
<d>0.51754362</d>
<d>0.51813426</d>
<d>0.52073716</d>
<d>0.52083452</d>
<d>0.5215035</d>
<d>0.52192984</d>
<d>0.52222349</d>
<d>0.52331589</d>
<d>0.52500142</d>
<d>0.52534571</d>
<d>0.52631605</d>
<d>0.52688014</d>
<d>0.52777936</d>
<d>0.52849753</d>
<d>0.52916596</d>
<d>0.52995426</d>
<d>0.53070227</d>
<d>0.53225678</d>
<d>0.53333286</d>
<d>0.53333523</d>
<d>0.53367917</d>
<d>0.5345628</d>
<d>0.53508849</d>
<d>0.53749976</d>
<d>0.53763342</d>
<d>0.53886081</d>
<d>0.53888794</d>
<d>0.53916873</d>
<d>0.5394747</d>
<d>0.54166667</d>
<d>0.54301006</d>
<d>0.54377728</d>
<d>0.54386092</d>
<d>0.54404244</d>
<d>0.54444381</d>
<d>0.54583357</d>
<d>0.54824714</d>
<d>0.54838583</d>
<d>0.5483867</d>
<d>0.54922408</d>
<d>0.54999968</d>
<d>0.55000047</d>
<d>0.55263335</d>
<d>0.55299438</d>
<d>0.55376334</d>
<d>0.55416738</d>
<d>0.55440277</d>
<d>0.55555556</d>
<d>0.55701707</d>
<d>0.55760293</d>
<d>0.55833428</d>
<d>0.55913998</d>
<d>0.55958441</d>
<d>0.56111143</d>
<d>0.56140329</d>
<d>0.56221147</d>
<d>0.56250119</d>
<d>0.56451662</d>
<d>0.56476605</d>
<d>0.56578951</d>
<d>0.5666673</d>
<d>0.56666809</d>
<d>0.56682002</d>
<d>0.56989326</d>
<d>0.56994768</d>
<d>0.57017572</d>
<d>0.57083262</d>
<d>0.57142857</d>
<d>0.57222317</d>
<d>0.57456194</d>
<d>0.57499953</d>
<d>0.57512932</d>
<d>0.57526684</d>
<d>0.57603712</d>
<d>0.57777904</d>
<d>0.57894816</d>
<d>0.57916643</d>
<d>0.58031096</d>
<d>0.58064348</d>
<d>0.58064567</d>
<d>0.58333333</d>
<d>0.58333437</d>
<d>0.58333491</d>
<d>0.5852516</d>
<d>0.58549259</d>
<d>0.58602012</d>
<d>0.58750024</d>
<d>0.58772059</d>
<d>0.58889079</d>
<d>0.58986014</d>
<d>0.59067423</d>
<d>0.59139676</d>
<d>0.59166714</d>
<d>0.59210681</d>
<d>0.5944435</d>
<d>0.59446869</d>
<d>0.59583404</d>
<d>0.59585587</d>
<d>0.59649302</d>
<d>0.5967734</d>
<d>0.59907724</d>
<d>0.59999937</d>
<d>0.60000095</d>
<d>0.60087674</d>
<d>0.60103751</d>
<d>0.60215004</d>
<d>0.60368579</d>
<d>0.60416785</d>
<d>0.60526296</d>
<d>0.60555524</d>
<d>0.6062162</d>
<d>0.60752668</d>
<d>0.60829434</d>
<d>0.60833476</d>
<d>0.60964918</d>
<d>0.61111111</d>
<d>0.61139783</d>
<d>0.61249929</d>
<d>0.61290289</d>
<d>0.61290332</d>
<d>0.61403539</d>
<d>0.61657947</d>
<d>0.61666619</d>
<d>0.61666698</d>
<d>0.61751144</d>
<d>0.61827996</d>
<d>0.61842161</d>
<d>0.6208331</d>
<d>0.62176111</d>
<d>0.62211998</d>
<d>0.62222285</d>
<d>0.62280783</d>
<d>0.6236566</d>
<d>0.625</d>
<d>0.62672853</d>
<d>0.62694275</d>
<d>0.62719404</d>
<d>0.62777873</d>
<d>0.62903019</d>
<d>0.6291669</d>
<d>0.63133446</d>
<d>0.63158026</d>
<d>0.63212438</d>
<d>0.63333381</d>
<d>0.6333346</d>
<d>0.63440683</d>
<d>0.63594301</d>
<d>0.63596648</d>
<d>0.63730602</d>
<d>0.63750071</d>
<d>0.63889047</d>
<d>0.63978347</d>
<d>0.64035269</d>
<d>0.64055156</d>
<d>0.64166761</d>
<d>0.64248766</d>
<d>0.64444634</d>
<d>0.64473642</d>
<d>0.64516011</d>
<d>0.64516011</d>
<d>0.64583452</d>
<d>0.64766929</d>
<d>0.64912263</d>
<d>0.64976866</d>
<d>0.64999905</d>
<d>0.65000142</d>
<d>0.65053675</d>
<d>0.65285093</d>
<d>0.65350885</d>
<d>0.65416596</d>
<d>0.6543772</d>
<d>0.65555492</d>
<d>0.65591339</d>
<d>0.65789507</d>
<d>0.65802962</d>
<d>0.65833286</d>
<d>0.65898575</d>
<d>0.6611108</d>
<d>0.66129003</d>
<d>0.66228128</d>
<d>0.66249976</d>
<d>0.66321126</d>
<d>0.6635943</d>
<d>0.66666667</d>
<d>0.66666667</d>
<d>0.66666667</d>
<d>0.6666675</d>
<d>0.66820285</d>
<d>0.6683929</d>
<d>0.67083357</d>
<d>0.67105371</d>
<d>0.67204331</d>
<d>0.67222254</d>
<d>0.6728114</d>
<d>0.67357453</d>
<d>0.67500047</d>
<d>0.67543993</d>
<d>0.67741733</d>
<d>0.67741995</d>
<d>0.67777841</d>
<d>0.67875617</d>
<d>0.67916738</d>
<d>0.67982615</d>
<d>0.68202587</d>
<d>0.68279353</d>
<d>0.68333428</d>
<d>0.68333428</d>
<d>0.68393781</d>
<d>0.68421236</d>
<d>0.68663442</d>
<d>0.68750119</d>
<d>0.68817017</d>
<d>0.68859609</d>
<d>0.68889015</d>
<d>0.68911945</d>
<d>0.69124297</d>
<d>0.69166809</d>
<d>0.6929823</d>
<d>0.69354681</d>
<d>0.69430108</d>
<d>0.69444602</d>
<d>0.69583262</d>
<d>0.69585152</d>
<d>0.69736852</d>
<d>0.69892345</d>
<d>0.69948272</d>
<d>0.69999953</d>
<d>0.7000019</d>
<d>0.70046007</d>
<d>0.70175474</d>
<d>0.70416643</d>
<d>0.70430009</d>
<d>0.70466436</d>
<d>0.70506862</d>
<d>0.70555461</d>
<d>0.70614095</d>
<d>0.70833333</d>
<d>0.70967673</d>
<d>0.70967717</d>
<d>0.70984305</d>
<d>0.71052717</d>
<d>0.71111048</d>
<d>0.71250024</d>
<d>0.71428571</d>
<d>0.71491339</d>
<d>0.71502468</d>
<d>0.71505337</d>
<d>0.71666635</d>
<d>0.71666714</d>
<d>0.71889426</d>
<d>0.7192996</d>
<d>0.72020632</d>
<d>0.72043001</d>
<d>0.72083404</d>
<d>0.72222222</d>
<d>0.72350019</d>
<d>0.72368582</d>
<d>0.72500095</d>
<d>0.72538796</d>
<d>0.72580665</d>
<d>0.72777809</d>
<d>0.72807204</d>
<d>0.72810874</d>
<d>0.72916785</d>
<d>0.7305696</d>
<d>0.73118329</d>
<d>0.73245576</d>
<d>0.73271729</d>
<d>0.73333397</d>
<d>0.73333476</d>
<d>0.73575123</d>
<d>0.73655687</d>
<d>0.73684197</d>
<d>0.73732584</d>
<d>0.73749929</d>
<d>0.73888984</d>
<d>0.74093287</d>
<d>0.74122819</d>
<d>0.74166619</d>
<d>0.74193351</d>
<d>0.74193438</d>
<d>0.74444571</d>
<d>0.74561441</d>
<d>0.7458331</d>
<d>0.74611451</d>
<d>0.74654293</d>
<d>0.74731015</d>
<d>0.75</d>
<d>0.75000062</d>
<d>0.75000158</d>
<d>0.75115148</d>
<d>0.75129615</d>
<d>0.75268679</d>
<d>0.7541669</d>
<d>0.75438684</d>
<d>0.75555745</d>
<d>0.75576003</d>
<d>0.75647778</d>
<d>0.75806343</d>
<d>0.75833381</d>
<d>0.75877306</d>
<d>0.76036858</d>
<d>0.76111016</d>
<d>0.76165647</d>
<d>0.76250071</d>
<d>0.76315927</d>
<d>0.76344007</d>
<d>0.76497713</d>
<d>0.76666603</d>
<d>0.76666761</d>
<d>0.76683811</d>
<d>0.76754549</d>
<d>0.76881671</d>
<d>0.76958305</d>
<d>0.77083452</d>
<d>0.77193171</d>
<d>0.77201975</d>
<d>0.77222191</d>
<d>0.7741916</d>
<d>0.77419335</d>
<d>0.77500142</d>
<d>0.77631543</d>
<d>0.77720139</d>
<d>0.77777778</d>
<d>0.77880015</d>
<d>0.77916596</d>
<d>0.77956999</d>
<d>0.78070164</d>
<d>0.78238302</d>
<d>0.78333286</d>
<d>0.78333365</d>
<d>0.7834087</d>
<d>0.78494663</d>
<d>0.78508786</d>
<d>0.78749976</d>
<d>0.78756466</d>
<d>0.78801725</d>
<d>0.78888952</d>
<d>0.78947408</d>
<d>0.79032021</d>
<d>0.79166667</d>
<d>0.7926258</d>
<d>0.7927463</d>
<d>0.79386029</d>
<d>0.79444539</d>
<d>0.79569685</d>
<d>0.79583357</d>
<d>0.79723435</d>
<d>0.79792793</d>
<d>0.79824651</d>
<d>0.80000047</d>
<d>0.80000126</d>
<d>0.80107349</d>
<d>0.8018429</d>
<d>0.80263273</d>
<d>0.80310957</d>
<d>0.80416738</d>
<d>0.80555714</d>
<d>0.80645013</d>
<d>0.80645144</d>
<d>0.80701894</d>
<d>0.80829121</d>
<d>0.80833428</d>
<d>0.81105999</d>
<d>0.81111301</d>
<d>0.81140516</d>
<d>0.81182677</d>
<d>0.81250119</d>
<d>0.8134699</d>
<d>0.81566592</d>
<d>0.81579138</d>
<d>0.81666572</d>
<d>0.81666809</d>
<d>0.81720341</d>
<d>0.81865154</d>
<d>0.8201751</d>
<d>0.82027447</d>
<d>0.82083262</d>
<d>0.82222159</d>
<d>0.82258005</d>
<d>0.82383317</d>
<d>0.82456132</d>
<d>0.82488302</d>
<d>0.82499953</d>
<d>0.82777746</d>
<d>0.82795669</d>
<d>0.82894753</d>
<d>0.82901481</d>
<d>0.82916643</d>
<d>0.82949157</d>
<d>0.83333333</d>
<d>0.83333333</d>
<d>0.83333333</d>
<d>0.83333375</d>
<d>0.83410011</d>
<d>0.83419645</d>
<d>0.83750024</d>
<d>0.83771997</d>
<d>0.83870866</d>
<d>0.83870997</d>
<d>0.8388892</d>
<d>0.83937809</d>
<d>0.84166714</d>
<d>0.84210618</d>
<d>0.84331721</d>
<d>0.84408356</d>
<d>0.84444508</d>
<d>0.84455972</d>
<d>0.84583404</d>
<d>0.8464924</d>
<d>0.84792576</d>
<d>0.8494602</d>
<d>0.84974136</d>
<d>0.85000095</d>
<d>0.85000095</d>
<d>0.85087862</d>
<d>0.85253431</d>
<d>0.85416785</d>
<d>0.85483684</d>
<d>0.854923</d>
<d>0.85526483</d>
<d>0.85555682</d>
<d>0.85714286</d>
<d>0.85833476</d>
<d>0.85965105</d>
<d>0.86010463</d>
<d>0.86021348</d>
<d>0.86111269</d>
<d>0.86174878</d>
<d>0.86250166</d>
<d>0.86403477</d>
<d>0.86528332</d>
<d>0.86559012</d>
<d>0.86635733</d>
<d>0.86666619</d>
<d>0.86666856</d>
<d>0.86842099</d>
<d>0.87046496</d>
<d>0.8708331</d>
<d>0.87096588</d>
<d>0.87096676</d>
<d>0.87222127</d>
<d>0.8728072</d>
<d>0.875</d>
<d>0.87557443</d>
<d>0.8756466</d>
<d>0.8763434</d>
<d>0.87719342</d>
<d>0.87777715</d>
<d>0.8791669</d>
<d>0.88018298</d>
<d>0.88082824</d>
<d>0.88157964</d>
<d>0.88172004</d>
<d>0.88333302</d>
<d>0.88333381</d>
<d>0.88479153</d>
<d>0.88596585</d>
<d>0.88600987</d>
<d>0.88709668</d>
<d>0.88750071</d>
<d>0.88888889</d>
<d>0.88940008</d>
<d>0.89035207</d>
<d>0.89119151</d>
<d>0.89166761</d>
<d>0.89247332</d>
<d>0.89400862</d>
<d>0.89444476</d>
<d>0.89473829</d>
<d>0.89583452</d>
<d>0.89637315</d>
<d>0.8978469</d>
<d>0.89861717</d>
<d>0.8991245</d>
<d>0.90000063</d>
<d>0.90000142</d>
<d>0.90155479</d>
<d>0.90322354</d>
<d>0.90322572</d>
<d>0.90351072</d>
<d>0.90416833</d>
<d>0.9055565</d>
<d>0.90673642</d>
<d>0.90783165</d>
<d>0.90789694</d>
<d>0.90833286</d>
<d>0.90860018</d>
<d>0.91111238</d>
<d>0.91191806</d>
<d>0.91228066</d>
<d>0.9124402</d>
<d>0.91249976</d>
<d>0.91397682</d>
<d>0.91666667</d>
<d>0.91666687</d>
<d>0.91666825</d>
<d>0.91704875</d>
<d>0.91709675</d>
<d>0.91935346</d>
<d>0.92083357</d>
<d>0.92105309</d>
<d>0.92165729</d>
<d>0.92222412</d>
<d>0.92227839</d>
<d>0.9247301</d>
<d>0.92500047</d>
<d>0.92543931</d>
<d>0.92626584</d>
<d>0.92746003</d>
<d>0.92777683</d>
<d>0.92916738</d>
<d>0.92982552</d>
<d>0.93010674</d>
<d>0.93087439</d>
<d>0.93264166</d>
<d>0.9333327</d>
<d>0.93333428</d>
<d>0.93421174</d>
<d>0.93548294</d>
<d>0.93548338</d>
<d>0.93750119</d>
<d>0.9378233</d>
<d>0.93859796</d>
<d>0.93888857</d>
<d>0.94009149</d>
<d>0.94086002</d>
<d>0.94166809</d>
<d>0.94298417</d>
<d>0.94300494</d>
<d>0.94444444</d>
<d>0.94470004</d>
<d>0.94583499</d>
<d>0.94623666</d>
<d>0.94737039</d>
<d>0.94818657</d>
<d>0.94930859</d>
<d>0.94999953</d>
<d>0.95000032</d>
<d>0.95161024</d>
<d>0.95175661</d>
<d>0.95336821</d>
<d>0.95391714</d>
<d>0.95416643</d>
<d>0.95555619</d>
<d>0.95614033</d>
<d>0.95698688</d>
<d>0.95833333</d>
<d>0.95852306</d>
<d>0.95854985</d>
<d>0.96052655</d>
<d>0.96111206</d>
<d>0.96236352</d>
<d>0.96250024</d>
<d>0.96313161</d>
<d>0.96373149</d>
<d>0.96491276</d>
<d>0.96666714</d>
<d>0.96666793</d>
<d>0.96774016</d>
<d>0.96774016</d>
<d>0.96891018</d>
<d>0.96929898</d>
<d>0.97083404</d>
<d>0.9722238</d>
<d>0.97234871</d>
<d>0.9731168</d>
<d>0.9736852</d>
<d>0.97409181</d>
<d>0.97500095</d>
<d>0.97695726</d>
<d>0.97777967</d>
<d>0.97807141</d>
<d>0.97849344</d>
<d>0.97916785</d>
<d>0.97927345</d>
<d>0.98156581</d>
<d>0.98245763</d>
<d>0.98333239</d>
<d>0.98333476</d>
<d>0.98387008</d>
<d>0.98445509</d>
<d>0.98617435</d>
<d>0.98684385</d>
<d>0.98750166</d>
<d>0.98888826</d>
<d>0.98924672</d>
<d>0.98963673</d>
<d>0.9907829</d>
<d>0.99123006</d>
<d>0.99166619</d>
<d>0.99444413</d>
<d>0.99462336</d>
<d>0.99481836</d>
<d>0.99539145</d>
<d>0.99561628</d>
<d>0.9958331</d>
<d>1</d>
<d>1</d>
<d>1</d>
<d>1</d>
<d>1</d>
<d>1</d>
</Subcolumn>
</XAdvancedColumn>
<YColumn Width="81" Decimals="8" Subcolumns="1">
<Title></Title>
<Subcolumn>
<d>0.69920078</d>
<d></d>
<d></d>
<d></d>
<d></d>
<d></d>
<d></d>
<d>0.43876673</d>
<d></d>
<d></d>
<d></d>
<d></d>
<d></d>
<d>0.43691233</d>
<d></d>
<d></d>
<d></d>
<d></d>
<d></d>
<d>0.49701016</d>
<d></d>
<d></d>
<d></d>
<d></d>
<d></d>
<d>0.36159928</d>
<d></d>
<d></d>
<d></d>
<d></d>
<d>0.3968846</d>
<d></d>
<d></d>
<d></d>
<d></d>
<d>0.39461068</d>
<d></d>
<d></d>
<d></d>
<d></d>
<d>0.33827334</d>
<d></d>
<d></d>
<d></d>
<d></d>
<d></d>
<d>0.35239415</d>
<d></d>
<d></d>
<d></d>
<d></d>
<d></d>
<d>0.47174773</d>
<d></d>
<d></d>
<d></d>
<d></d>
<d>0.49630792</d>
<d></d>
<d></d>
<d></d>
<d></d>
<d>0.31505987</d>
<d></d>
<d></d>
<d></d>
<d></d>
<d></d>
<d>0.28934752</d>
<d></d>
<d></d>
<d></d>
<d></d>
<d></d>
<d>0.37675978</d>
<d></d>
<d></d>
<d></d>
<d></d>
<d>0.29510225</d>
<d></d>
<d></d>
<d></d>
<d></d>
<d>0.33111717</d>
<d></d>
<d></d>
<d></d>
<d></d>
<d></d>
<d>0.4284368</d>
<d></d>
<d></d>
<d></d>
<d></d>
<d>0.34372102</d>
<d></d>
<d></d>
<d></d>
<d></d>
<d></d>
<d>0.26770574</d>
<d></d>
<d></d>
<d></d>
<d></d>
<d>0.29386801</d>
<d></d>
<d></d>
<d></d>
<d></d>
<d></d>
<d>0.27045694</d>
<d></d>
<d></d>
<d></d>
<d></d>
<d>0.36379113</d>
<d></d>
<d></d>
<d></d>
<d></d>
<d>0.48926423</d>
<d></d>
<d></d>
<d></d>
<d></d>
<d></d>
<d>0.47026117</d>
<d></d>
<d></d>
<d></d>
<d></d>
<d>0.42004335</d>
<d></d>
<d></d>
<d></d>
<d></d>
<d></d>
<d>0.56780272</d>
<d></d>
<d></d>
<d></d>
<d></d>
<d></d>
<d>0.68597981</d>
<d></d>
<d></d>
<d></d>
<d></d>
<d>0.52547371</d>
<d></d>
<d></d>
<d></d>
<d></d>
<d>0.35809112</d>
<d></d>
<d></d>
<d></d>
<d></d>
<d>0.42315935</d>
<d></d>
<d></d>
<d></d>
<d></d>
<d></d>
<d>0.36421065</d>
<d></d>
<d></d>
<d></d>
<d></d>
<d></d>
<d>0.38377611</d>
<d></d>
<d></d>
<d></d>
<d></d>
<d></d>
<d>0.33698134</d>
<d></d>
<d></d>
<d></d>
<d>0.42635744</d>
<d></d>
<d></d>
<d></d>
<d></d>
<d>0.48510854</d>
<d></d>
<d></d>
<d></d>
<d></d>
<d></d>
<d>0.55988959</d>
<d></d>
<d></d>
<d></d>
<d></d>
<d></d>
<d>0.68218892</d>
<d></d>
<d></d>
<d></d>
<d></d>
<d></d>
<d>0.48508118</d>
<d></d>
<d></d>
<d></d>
<d>0.37493274</d>
<d></d>
<d></d>
<d></d>
<d></d>
<d></d>
<d></d>
<d>0.48673799</d>
<d></d>
<d></d>
<d></d>
<d></d>
<d>0.54290509</d>
<d></d>
<d></d>
<d></d>
<d></d>
<d></d>
<d>0.62397286</d>
<d></d>
<d></d>
<d></d>
<d></d>
<d>0.62054678</d>
<d></d>
<d></d>
<d></d>
<d></d>
<d>0.61437253</d>
<d></d>
<d></d>
<d></d>
<d></d>
<d>0.52376219</d>
<d></d>
<d></d>
<d></d>
<d></d>
<d></d>
<d>0.46863172</d>
<d></d>
<d></d>
<d></d>
<d></d>
<d>0.49524391</d>
<d></d>
<d></d>
<d></d>
<d></d>
<d></d>
<d>0.72073009</d>
<d></d>
<d></d>
<d></d>
<d></d>
<d>0.80353674</d>
<d></d>
<d></d>
<d></d>
<d></d>
<d>0.65257625</d>
<d></d>
<d></d>
<d></d>
<d></d>
<d></d>
<d>0.57515952</d>
<d></d>
<d></d>
<d></d>
<d></d>
<d></d>
<d>0.4619802</d>
<d></d>
<d></d>
<d></d>
<d></d>
<d></d>
<d>0.50792985</d>
<d></d>
<d></d>
<d></d>
<d>0.42905392</d>
<d></d>
<d></d>
<d></d>
<d></d>
<d></d>
<d>0.30391522</d>
<d></d>
<d></d>
<d></d>
<d></d>
<d>0.39236412</d>
<d></d>
<d></d>
<d></d>
<d></d>
<d></d>
<d>0.30383314</d>
<d></d>
<d></d>
<d></d>
<d></d>
<d>0.45600051</d>
<d></d>
<d></d>
<d></d>
<d></d>
<d></d>
<d></d>
<d>0.3051221</d>
<d></d>
<d></d>
<d></d>
<d></d>
<d>0.24306043</d>
<d></d>
<d></d>
<d></d>
<d></d>
<d>0.3793681</d>
<d></d>
<d></d>
<d></d>
<d></d>
<d></d>
<d>0.3711449</d>
<d></d>
<d></d>
<d></d>
<d></d>
<d>0.44179761</d>
<d></d>
<d></d>
<d></d>
<d></d>
<d>0.55250542</d>
<d></d>
<d></d>
<d></d>
<d></d>
<d></d>
<d>0.47977638</d>
<d></d>
<d></d>
<d></d>
<d></d>
<d></d>
<d>0.44569794</d>
<d></d>
<d></d>
<d></d>
<d>0.58551682</d>
<d></d>
<d></d>
<d></d>
<d></d>
<d>0.61190101</d>
<d></d>
<d></d>
<d></d>
<d></d>
<d></d>
<d>0.5566611</d>
<d></d>
<d></d>
<d></d>
<d></d>
<d></d>
<d>0.68842093</d>
<d></d>
<d></d>
<d></d>
<d></d>
<d></d>
<d>0.51368458</d>
<d></d>
<d></d>
<d></d>
<d></d>
<d>0.38268171</d>
<d></d>
<d></d>
<d></d>
<d>0.32572724</d>
<d></d>
<d></d>
<d></d>
<d></d>
<d></d>
<d>0.22453465</d>
<d></d>
<d></d>
<d></d>
<d></d>
<d></d>
<d>0.26599422</d>
<d></d>
<d></d>
<d></d>
<d></d>
<d></d>
<d>0.50905465</d>
<d></d>
<d></d>
<d></d>
<d>0.51680058</d>
<d></d>
<d></d>
<d></d>
<d></d>
<d></d>
<d></d>
<d>0.4085339</d>
<d></d>
<d></d>
<d></d>
<d></d>
<d></d>
<d>0.4805911</d>
<d></d>
<d></d>
<d></d>
<d></d>
<d>0.63475271</d>
<d></d>
<d></d>
<d></d>
<d></d>
<d></d>
<d>0.5856293</d>
<d></d>
<d></d>
<d></d>
<d></d>
<d>0.54442205</d>
<d></d>
<d></d>
<d></d>
<d></d>
<d>0.40639982</d>
<d></d>
<d></d>
<d></d>
<d></d>
<d>0.53574892</d>
<d></d>
<d></d>
<d></d>
<d></d>
<d></d>
<d>0.74526291</d>
<d></d>
<d></d>
<d></d>
<d></d>
<d>0.4809559</d>
<d></d>
<d></d>
<d></d>
<d></d>
<d>0.64468744</d>
<d></d>
<d></d>
<d></d>
<d></d>
<d>0.65389561</d>
<d></d>
<d></d>
<d></d>
<d></d>
<d></d>
<d>0.53973436</d>
<d></d>
<d></d>
<d></d>
<d></d>
<d></d>
<d>0.3390607</d>
<d></d>
<d></d>
<d></d>
<d></d>
<d></d>
<d>0.49549623</d>
<d></d>
<d></d>
<d></d>
<d></d>
<d>0.54658349</d>
<d></d>
<d></d>
<d></d>
<d></d>
<d>0.75534053</d>
<d></d>
<d></d>
<d></d>
<d></d>
<d>0.9427385</d>
<d></d>
<d></d>
<d></d>
<d></d>
<d></d>
<d>0.94265338</d>
<d></d>
<d></d>
<d></d>
<d></d>
<d></d>
<d>0.80053322</d>
<d></d>
<d></d>
<d></d>
<d></d>
<d></d>
<d>0.40446333</d>
<d></d>
<d></d>
<d></d>
<d></d>
<d></d>
<d>0.35980264</d>
<d></d>
<d></d>
<d></d>
<d>0.43685761</d>
<d></d>
<d></d>
<d></d>
<d></d>
<d></d>
<d>0.33355829</d>
<d></d>
<d></d>
<d></d>
<d></d>
<d>0.32968533</d>
<d></d>
<d></d>
<d></d>
<d></d>
<d></d>
<d>1</d>
<d></d>
<d></d>
<d></d>
<d></d>
<d></d>
<d>0.62349558</d>
<d></d>
<d></d>
<d></d>
<d></d>
<d></d>
<d>0.57173344</d>
<d></d>
<d></d>
<d></d>
<d>0.54582653</d>
<d></d>
<d></d>
<d></d>
<d>0.50737049</d>
<d></d>
<d></d>
<d></d>
<d></d>
<d></d>
<d>0.33353093</d>
<d></d>
<d></d>
<d></d>
<d></d>
<d></d>
<d>0.28887024</d>
<d></d>
<d></d>
<d></d>
<d></d>
<d></d>
<d>0.31334835</d>
<d></d>
<d></d>
<d></d>
<d></d>
<d>0.36196409</d>
<d></d>
<d></d>
<d></d>
<d></d>
<d>0.42349375</d>
<d></d>
<d></d>
<d></d>
<d></d>
<d>0.59301042</d>
<d></d>
<d></d>
<d></d>
<d></d>
<d></d>
<d>0.55736334</d>
<d></d>
<d></d>
<d></d>
<d></d>
<d></d>
<d>0.78585304</d>
<d></d>
<d></d>
<d></d>
<d></d>
<d></d>
<d></d>
<d>0.39520044</d>
<d></d>
<d></d>
<d></d>
<d>0.37086218</d>
<d></d>
<d></d>
<d></d>
<d></d>
<d></d>
<d>0.23550906</d>
<d></d>
<d></d>
<d></d>
<d></d>
<d></d>
<d>0.42450608</d>
<d></d>
<d></d>
<d></d>
<d></d>
<d>0.34978279</d>
<d></d>
<d></d>
<d></d>
<d></d>
<d>0.23562154</d>
<d></d>
<d></d>
<d></d>
<d></d>
<d>0.2892624</d>
<d></d>
<d></d>
<d></d>
<d></d>
<d></d>
<d>0.24465947</d>
<d></d>
<d></d>
<d></d>
<d></d>
<d></d>
<d>0.26276573</d>
<d></d>
<d></d>
<d></d>
<d></d>
<d></d>
<d>0.24665372</d>
<d></d>
<d></d>
<d></d>
<d>0.11595789</d>
<d></d>
<d></d>
<d></d>
<d>0.17504644</d>
<d></d>
<d></d>
<d></d>
<d></d>
<d></d>
<d>0.21069352</d>
<d></d>
<d></d>
<d></d>
<d></d>
<d></d>
<d>0.20609095</d>
<d></d>
<d></d>
<d></d>
<d></d>
<d></d>
<d>0.17456916</d>
<d></d>
<d></d>
<d></d>
<d></d>
<d>0.26711598</d>
<d></d>
<d></d>
<d></d>
<d></d>
<d></d>
<d>0.23851259</d>
<d></d>
<d></d>
<d></d>
<d>0.21866744</d>
<d></d>
<d></d>
<d></d>
<d></d>
<d></d>
<d>0.3024013</d>
<d></d>
<d></d>
<d></d>
<d></d>
<d></d>
<d>0.43573281</d>
<d></d>
<d></d>
<d></d>
<d></d>
<d></d>
<d>0.45807683</d>
<d></d>
<d></d>
<d></d>
<d></d>
<d></d>
<d>0.46189508</d>
<d></d>
<d></d>
<d></d>
<d></d>
<d>0.51991658</d>
<d></d>
<d></d>
<d></d>
<d></d>
<d>0.496086</d>
<d></d>
<d></d>
<d></d>
<d></d>
<d>0.51267529</d>
<d></d>
<d></d>
<d></d>
<d></d>
<d></d>
<d>0.52056106</d>
<d></d>
<d></d>
<d></d>
<d></d>
<d></d>
<d>0.6108066</d>
<d></d>
<d></d>
<d></d>
<d></d>
<d></d>
<d>0.49743272</d>
<d></d>
<d></d>
<d></d>
<d></d>
<d>0.56909472</d>
<d></d>
<d></d>
<d></d>
<d></d>
<d>0.3541604</d>
<d></d>
<d></d>
<d></d>
<d></d>
<d>0.42357887</d>
<d></d>
<d></d>
<d></d>
<d></d>
<d></d>
<d>0.44671026</d>
<d></d>
<d></d>
<d></d>
<d></d>
<d>0.52912475</d>
<d></d>
<d></d>
<d></d>
<d></d>
<d>0.3749905</d>
<d></d>
<d></d>
<d></d>
<d></d>
<d>0.39368348</d>
<d></d>
<d></d>
<d></d>
<d></d>
<d></d>
<d>0.48971415</d>
<d></d>
<d></d>
<d></d>
<d></d>
<d>0.48740983</d>
<d></d>
<d></d>
<d></d>
<d></d>
<d></d>
<d>0.46849188</d>
<d></d>
<d></d>
<d></d>
<d></d>
<d></d>
<d></d>
<d>0.63840072</d>
<d></d>
<d></d>
<d></d>
<d>0.5717912</d>
<d></d>
<d></d>
<d></d>
<d></d>
<d></d>
<d>0.53406476</d>
<d></d>
<d></d>
<d></d>
<d></d>
<d></d>
<d>0.41336142</d>
<d></d>
<d></d>
<d></d>
<d></d>
<d></d>
<d>0.29398049</d>
<d></d>
<d></d>
<d></d>
<d>0.36884361</d>
<d></d>
<d></d>
<d></d>
<d></d>
<d>0.49322231</d>
<d></d>
<d></d>
<d></d>
<d></d>
<d></d>
<d>0.6115362</d>
<d></d>
<d></d>
<d></d>
<d></d>
<d></d>
<d>0.63028695</d>
<d></d>
<d></d>
<d></d>
<d></d>
<d></d>
<d>0.45667539</d>
<d></d>
<d></d>
<d></d>
<d></d>
<d>0.47082053</d>
<d></d>
<d></d>
<d></d>
<d>0.37849866</d>
<d></d>
<d></d>
<d></d>
<d></d>
<d></d>
<d>0.33507526</d>
<d></d>
<d></d>
<d></d>
<d></d>
<d></d>
<d>0.27991743</d>
<d></d>
<d></d>
<d></d>
<d></d>
<d>0.33877798</d>
<d></d>
<d></d>
<d></d>
<d></d>
<d>0.34240166</d>
<d></d>
<d></d>
<d></d>
<d></d>
<d></d>
<d>0.29263073</d>
<d></d>
<d></d>
<d></d>
<d></d>
<d>0.23239306</d>
<d></d>
<d></d>
<d></d>
<d></d>
<d>0.29990242</d>
<d></d>
<d></d>
<d></d>
<d></d>
<d></d>
<d>0.54720061</d>
<d></d>
<d></d>
<d></d>
<d></d>
<d></d>
<d>0.47466613</d>
<d></d>
<d></d>
<d></d>
<d></d>
<d></d>
<d>0.52179834</d>
<d></d>
<d></d>
<d></d>
<d></d>
<d>0.59503203</d>
<d></d>
<d></d>
<d></d>
<d></d>
<d></d>
<d>0.48311734</d>
<d></d>
<d></d>
<d></d>
<d>0.53117371</d>
<d></d>
<d></d>
<d></d>
<d></d>
<d></d>
<d>0.42046287</d>
<d></d>
<d></d>
<d></d>
<d></d>
<d></d>
<d>0.42885632</d>
<d></d>
<d></d>
<d></d>
<d></d>
<d></d>
<d>0.41936847</d>
<d></d>
<d></d>
<d></d>
<d></d>
<d>0.53414684</d>
<d></d>
<d></d>
<d></d>
<d></d>
<d>0.5856293</d>
<d></d>
<d></d>
<d></d>
<d></d>
<d></d>
<d>0.78714504</d>
<d></d>
<d></d>
<d></d>
<d></d>
<d>0.77313671</d>
<d></d>
<d></d>
<d></d>
<d></d>
<d></d>
<d>0.63660407</d>
<d></d>
<d></d>
<d></d>
<d></d>
<d>0.41313646</d>
<d></d>
<d></d>
<d></d>
<d></d>
<d>0.43343153</d>
<d></d>
<d></d>
<d></d>
<d></d>
<d>0.63388023</d>
<d></d>
<d></d>
<d></d>
<d></d>
<d></d>
<d>0.68690701</d>
<d></d>
<d></d>
<d></d>
<d></d>
<d>0.80336954</d>
<d></d>
<d></d>
<d></d>
<d></d>
<d></d>
<d></d>
<d>0.66880075</d>
<d></d>
<d></d>
<d></d>
<d>0.62543206</d>
<d></d>
<d></d>
<d></d>
<d></d>
<d></d>
<d>0.55983183</d>
<d></d>
<d></d>
<d></d>
<d></d>
<d></d>
<d>0.64283608</d>
<d></d>
<d></d>
<d></d>
<d></d>
<d></d>
<d>0.45639267</d>
<d></d>
<d></d>
<d></d>
<d></d>
<d>0.42703232</d>
<d></d>
<d></d>
<d></d>
<d>0.59360018</d>
<d></d>
<d></d>
<d></d>
<d></d>
<d></d>
<d>0.58386001</d>
<d></d>
<d></d>
<d></d>
<d></d>
<d></d>
<d>0.67797852</d>
<d></d>
<d></d>
<d></d>
<d></d>
<d></d>
<d>0.54102637</d>
<d></d>
<d></d>
<d></d>
<d></d>
<d>0.39222428</d>
<d></d>
<d></d>
<d></d>
<d></d>
<d>0.30745378</d>
<d></d>
<d></d>
<d></d>
<d></d>
<d>0.55677358</d>
<d></d>
<d></d>
<d></d>
<d></d>
<d></d>
<d>0.5524507</d>
<d></d>
<d></d>
<d></d>
<d></d>
<d></d>
<d>0.37743162</d>
<d></d>
<d></d>
<d></d>
<d></d>
<d>0.34658167</d>
<d></d>
<d></d>
<d></d>
<d></d>
<d></d>
<d>0.51172073</d>
<d></d>
<d></d>
<d></d>
<d></d>
<d>0.52412699</d>
<d></d>
<d></d>
<d></d>
<d></d>
<d>0.50433656</d>
<d></d>
<d></d>
<d></d>
<d></d>
<d>0.46613284</d>
<d></d>
<d></d>
<d></d>
<d></d>
<d></d>
<d>0.60791556</d>
<d></d>
<d></d>
<d></d>
<d></d>
<d></d>
<d>0.63391063</d>
<d></d>
<d></d>
<d></d>
<d></d>
<d>0.81330731</d>
<d></d>
<d></d>
<d></d>
<d></d>
<d></d>
<d>0.26880014</d>
<d></d>
<d></d>
<d></d>
<d></d>
<d>0.61973509</d>
<d></d>
<d></d>
<d></d>
<d></d>
<d>0.52502379</d>
<d></d>
<d></d>
<d></d>
<d></d>
<d></d>
<d>0.59772851</d>
<d></d>
<d></d>
<d></d>
<d></d>
<d></d>
<d>0.74851876</d>
<d></d>
<d></d>
<d></d>
<d></d>
<d>0.57675857</d>
<d></d>
<d></d>
<d></d>
<d></d>
<d>0.60033683</d>
<d></d>
<d></d>
<d></d>
<d></d>
<d></d>
<d>0.65819114</d>
<d></d>
<d></d>
<d></d>
<d></d>
<d></d>
<d>0.57044144</d>
<d></d>
<d></d>
<d></d>
<d></d>
<d>0.58408497</d>
<d></d>
<d></d>
<d></d>
<d></d>
<d>0.75851429</d>
<d></d>
<d></d>
<d></d>
<d></d>
<d>0.67346107</d>
<d></d>
<d></d>
<d></d>
<d></d>
<d></d>
<d>0.65835834</d>
<d></d>
<d></d>
<d></d>
<d></d>
<d></d>
<d>0.61052692</d>
<d></d>
<d></d>
<d></d>
<d></d>
<d></d>
<d>0.82989661</d>
<d></d>
<d>0.42560048</d>
</Subcolumn>
</YColumn>
<YColumn Width="81" Decimals="8" Subcolumns="1">
<Title></Title>
<Subcolumn>
<d></d>
<d>0.58360391</d>
<d></d>
<d></d>
<d></d>
<d></d>
<d></d>
<d></d>
<d></d>
<d>0.65911695</d>
<d></d>
<d></d>
<d></d>
<d></d>
<d></d>
<d>0.52355638</d>
<d></d>
<d></d>
<d></d>
<d></d>
<d></d>
<d>0.59443772</d>
<d></d>
<d></d>
<d></d>
<d></d>
<d></d>
<d>0.6682424</d>
<d></d>
<d></d>
<d></d>
<d></d>
<d></d>
<d></d>
<d>0.66540396</d>
<d></d>
<d></d>
<d></d>
<d></d>
<d></d>
<d></d>
<d>0.4970077</d>
<d></d>
<d></d>
<d></d>
<d></d>
<d></d>
<d>0.62650411</d>
<d></d>
<d></d>
<d></d>
<d></d>
<d></d>
<d>0.8313703</d>
<d></d>
<d></d>
<d></d>
<d></d>
<d></d>
<d></d>
<d></d>
<d>0.63603807</d>
<d></d>
<d></d>
<d></d>
<d></d>
<d></d>
<d>0.45409159</d>
<d></d>
<d></d>
<d></d>
<d></d>
<d></d>
<d>0.48829609</d>
<d></d>
<d></d>
<d></d>
<d></d>
<d></d>
<d></d>
<d>0.50440886</d>
<d></d>
<d></d>
<d></d>
<d></d>
<d></d>
<d></d>
<d>0.80559623</d>
<d></d>
<d></d>
<d></d>
<d></d>
<d></d>
<d>0.82424503</d>
<d></d>
<d></d>
<d></d>
<d></d>
<d>0.60119692</d>
<d></d>
<d></d>
<d></d>
<d></d>
<d></d>
<d>0.29111224</d>
<d></d>
<d></d>
<d></d>
<d></d>
<d></d>
<d></d>
<d></d>
<d></d>
<d>0.45118419</d>
<d></d>
<d></d>
<d></d>
<d></d>
<d></d>
<d>0.4719764</d>
<d></d>
<d></d>
<d></d>
<d></d>
<d></d>
<d>0.54961694</d>
<d></d>
<d></d>
<d></d>
<d></d>
<d></d>
<d>0.47098958</d>
<d></d>
<d></d>
<d></d>
<d></d>
<d></d>
<d></d>
<d>0.45034592</d>
<d></d>
<d></d>
<d></d>
<d></d>
<d></d>
<d>0.45734386</d>
<d></d>
<d></d>
<d></d>
<d></d>
<d></d>
<d></d>
<d>0.61618493</d>
<d></d>
<d></d>
<d></d>
<d></d>
<d></d>
<d>0.44000021</d>
<d></d>
<d></d>
<d></d>
<d></d>
<d></d>
<d></d>
<d></d>
<d>0.50660534</d>
<d></d>
<d></d>
<d></d>
<d></d>
<d></d>
<d>0.49630738</d>
<d></d>
<d></d>
<d></d>
<d></d>
<d></d>
<d>0.37896585</d>
<d></d>
<d></d>
<d></d>
<d></d>
<d></d>
<d>0.36744233</d>
<d></d>
<d></d>
<d></d>
<d></d>
<d></d>
<d></d>
<d>0.30771312</d>
<d></d>
<d></d>
<d></d>
<d></d>
<d>0.2008075</d>
<d></d>
<d></d>
<d></d>
<d></d>
<d></d>
<d>0.25558138</d>
<d></d>
<d></d>
<d></d>
<d></d>
<d></d>
<d>0.83126419</d>
<d></d>
<d></d>
<d></d>
<d></d>
<d></d>
<d></d>
<d></d>
<d>0.85619469</d>
<d></d>
<d></d>
<d></d>
<d></d>
<d></d>
<d></d>
<d>0.83875024</d>
<d></d>
<d></d>
<d></d>
<d></d>
<d></d>
<d>0.52212389</d>
<d></d>
<d></d>
<d></d>
<d></d>
<d></d>
<d>0.6186732</d>
<d></d>
<d></d>
<d></d>
<d></d>
<d></d>
<d></d>
<d>0.85428471</d>
<d></d>
<d></d>
<d></d>
<d></d>
<d></d>
<d>0.80968676</d>
<d></d>
<d></d>
<d></d>
<d></d>
<d></d>
<d></d>
<d>0.62074234</d>
<d></d>
<d></d>
<d></d>
<d></d>
<d></d>
<d>0.77771057</d>
<d></d>
<d></d>
<d></d>
<d></d>
<d></d>
<d></d>
<d>0.72029456</d>
<d></d>
<d></d>
<d></d>
<d></d>
<d></d>
<d></d>
<d>0.61109166</d>
<d></d>
<d></d>
<d></d>
<d></d>
<d></d>
<d>0.78686785</d>
<d></d>
<d></d>
<d></d>
<d></d>
<d></d>
<d>0.66647036</d>
<d></d>
<d></d>
<d></d>
<d></d>
<d></d>
<d>0.62828145</d>
<d></d>
<d></d>
<d></d>
<d></d>
<d></d>
<d></d>
<d>0.75923155</d>
<d></d>
<d></d>
<d></d>
<d></d>
<d></d>
<d>0.52272872</d>
<d></d>
<d></d>
<d></d>
<d></d>
<d></d>
<d>0.54581821</d>
<d></d>
<d></d>
<d></d>
<d></d>
<d></d>
<d></d>
<d>0.69877549</d>
<d></d>
<d></d>
<d></d>
<d></d>
<d></d>
<d></d>
<d></d>
<d>0.82505677</d>
<d></d>
<d></d>
<d></d>
<d></d>
<d></d>
<d>0.91557374</d>
<d></d>
<d></d>
<d></d>
<d></d>
<d></d>
<d>0.9415335</d>
<d></d>
<d></d>
<d></d>
<d></d>
<d></d>
<d>0.55804206</d>
<d></d>
<d></d>
<d></d>
<d></d>
<d></d>
<d></d>
<d>0.71303134</d>
<d></d>
<d></d>
<d></d>
<d></d>
<d></d>
<d>0.63098194</d>
<d></d>
<d></d>
<d></d>
<d></d>
<d></d>
<d>0.48467774</d>
<d></d>
<d></d>
<d></d>
<d></d>
<d></d>
<d></d>
<d>0.52247936</d>
<d></d>
<d></d>
<d></d>
<d></d>
<d></d>
<d></d>
<d>0.55872116</d>
<d></d>
<d></d>
<d></d>
<d></d>
<d></d>
<d>0.35023132</d>
<d></d>
<d></d>
<d></d>
<d></d>
<d>0.43062011</d>
<d></d>
<d></d>
<d></d>
<d></d>
<d></d>
<d></d>
<d>0.55350587</d>
<d></d>
<d></d>
<d></d>
<d></d>
<d></d>
<d></d>
<d>0.66388128</d>
<d></d>
<d></d>
<d></d>
<d></d>
<d></d>
<d>0.62323592</d>
<d></d>
<d></d>
<d></d>
<d></d>
<d></d>
<d>0.53530273</d>
<d></d>
<d></d>
<d></d>
<d></d>
<d></d>
<d></d>
<d>0.50823943</d>
<d></d>
<d></d>
<d></d>
<d></d>
<d></d>
<d></d>
<d>0.68936886</d>
<d></d>
<d></d>
<d></d>
<d></d>
<d></d>
<d></d>
<d>0.56997941</d>
<d></d>
<d></d>
<d></d>
<d></d>
<d></d>
<d>0.49505528</d>
<d></d>
<d></d>
<d></d>
<d></d>
<d></d>
<d>0.79114938</d>
<d></d>
<d></d>
<d></d>
<d></d>
<d></d>
<d></d>
<d>0.61961758</d>
<d></d>
<d></d>
<d></d>
<d></d>
<d></d>
<d>0.63528469</d>
<d></d>
<d></d>
<d></d>
<d></d>
<d></d>
<d></d>
<d>0.56099191</d>
<d></d>
<d></d>
<d></d>
<d></d>
<d></d>
<d></d>
<d>0.48542582</d>
<d></d>
<d></d>
<d></d>
<d></d>
<d></d>
<d></d>
<d>0.50252011</d>
<d></d>
<d></d>
<d></d>
<d></d>
<d>0.50417542</d>
<d></d>
<d></d>
<d></d>
<d></d>
<d></d>
<d>0.58955667</d>
<d></d>
<d></d>
<d></d>
<d></d>
<d></d>
<d>0.90564716</d>
<d></d>
<d></d>
<d></d>
<d></d>
<d></d>
<d></d>
<d>0.84671378</d>
<d></d>
<d></d>
<d></d>
<d></d>
<d></d>
<d></d>
<d>0.6014728</d>
<d></d>
<d></d>
<d></d>
<d></d>
<d></d>
<d>0.59570574</d>
<d></d>
<d></d>
<d></d>
<d></d>
<d></d>
<d></d>
<d>0.77149254</d>
<d></d>
<d></d>
<d></d>
<d></d>
<d></d>
<d>0.83239426</d>
<d></d>
<d></d>
<d></d>
<d></d>
<d></d>
<d></d>
<d>0.46434711</d>
<d></d>
<d></d>
<d></d>
<d></d>
<d></d>
<d>0.66966427</d>
<d></d>
<d></d>
<d></d>
<d></d>
<d></d>
<d>0.4511948</d>
<d></d>
<d></d>
<d></d>
<d></d>
<d></d>
<d>0.45578935</d>
<d></d>
<d></d>
<d></d>
<d></d>
<d></d>
<d></d>
<d>0.40201821</d>
<d></d>
<d></d>
<d></d>
<d></d>
<d></d>
<d>0.45617665</d>
<d></d>
<d></d>
<d></d>
<d></d>
<d></d>
<d></d>
<d></d>
<d>0.44408013</d>
<d></d>
<d></d>
<d></d>
<d></d>
<d>0.4539006</d>
<d></d>
<d></d>
<d></d>
<d></d>
<d></d>
<d></d>
<d>0.46196494</d>
<d></d>
<d></d>
<d></d>
<d></d>
<d></d>
<d>0.83104667</d>
<d></d>
<d></d>
<d></d>
<d></d>
<d></d>
<d>0.51588994</d>
<d></d>
<d></d>
<d></d>
<d></d>
<d></d>
<d></d>
<d>0.48221069</d>
<d></d>
<d></d>
<d></d>
<d></d>
<d></d>
<d></d>
<d>0.52916958</d>
<d></d>
<d></d>
<d></d>
<d></d>
<d></d>
<d>0.68509794</d>
<d></d>
<d></d>
<d></d>
<d></d>
<d></d>
<d></d>
<d>0.64783748</d>
<d></d>
<d></d>
<d></d>
<d></d>
<d></d>
<d>0.57009614</d>
<d></d>
<d></d>
<d></d>
<d></d>
<d></d>
<d></d>
<d>0.5001008</d>
<d></d>
<d></d>
<d></d>
<d></d>
<d></d>
<d></d>
<d>0.96506335</d>
<d></d>
<d></d>
<d></d>
<d></d>
<d></d>
<d>1</d>
<d></d>
<d></d>
<d></d>
<d></d>
<d></d>
<d>0.93588315</d>
<d></d>
<d></d>
<d></d>
<d></d>
<d></d>
<d></d>
<d>0.88766686</d>
<d></d>
<d></d>
<d></d>
<d></d>
<d>0.44787356</d>
<d></d>
<d></d>
<d></d>
<d></d>
<d></d>
<d></d>
<d></d>
<d>0.43069969</d>
<d></d>
<d></d>
<d></d>
<d></d>
<d></d>
<d>0.427527</d>
<d></d>
<d></d>
<d></d>
<d></d>
<d></d>
<d></d>
<d>0.35930371</d>
<d></d>
<d></d>
<d></d>
<d></d>
<d></d>
<d>0.90279281</d>
<d></d>
<d></d>
<d></d>
<d></d>
<d></d>
<d>0.81424418</d>
<d></d>
<d></d>
<d></d>
<d></d>
<d></d>
<d>0.55098045</d>
<d></d>
<d></d>
<d></d>
<d></d>
<d></d>
<d></d>
<d>0.8623862</d>
<d></d>
<d></d>
<d></d>
<d></d>
<d></d>
<d>0.71634197</d>
<d></d>
<d></d>
<d></d>
<d></d>
<d></d>
<d></d>
<d>0.45604401</d>
<d></d>
<d></d>
<d></d>
<d></d>
<d></d>
<d>0.40738736</d>
<d></d>
<d></d>
<d></d>
<d></d>
<d></d>
<d></d>
<d>0.65700006</d>
<d></d>
<d></d>
<d></d>
<d></d>
<d></d>
<d></d>
<d>0.4458787</d>
<d></d>
<d></d>
<d></d>
<d></d>
<d></d>
<d>0.26097175</d>
<d></d>
<d></d>
<d></d>
<d></d>
<d></d>
<d>0.23006727</d>
<d></d>
<d></d>
<d></d>
<d></d>
<d>0.22596082</d>
<d></d>
<d></d>
<d></d>
<d></d>
<d></d>
<d></d>
<d>0.40250631</d>
<d></d>
<d></d>
<d></d>
<d></d>
<d></d>
<d></d>
<d>0.40602385</d>
<d></d>
<d></d>
<d></d>
<d></d>
<d></d>
<d></d>
<d>0.76726406</d>
<d></d>
<d></d>
<d></d>
<d></d>
<d></d>
<d>0.59966363</d>
<d></d>
<d></d>
<d></d>
<d></d>
<d></d>
<d></d>
<d>0.65767386</d>
<d></d>
<d></d>
<d></d>
<d></d>
<d></d>
<d>0.50706161</d>
<d></d>
<d></d>
<d></d>
<d></d>
<d></d>
<d>0.56785722</d>
<d></d>
<d></d>
<d></d>
<d></d>
<d></d>
<d></d>
<d>0.694043</d>
<d></d>
<d></d>
<d></d>
<d></d>
<d></d>
<d></d>
<d>0.7226502</d>
<d></d>
<d></d>
<d></d>
<d></d>
<d></d>
<d></d>
<d>0.91952633</d>
<d></d>
<d></d>
<d></d>
<d></d>
<d></d>
<d>0.6748212</d>
<d></d>
<d></d>
<d></d>
<d></d>
<d></d>
<d>0.89475499</d>
<d></d>
<d></d>
<d></d>
<d></d>
<d></d>
<d></d>
<d>0.55294879</d>
<d></d>
<d></d>
<d></d>
<d></d>
<d></d>
<d></d>
<d>0.33463848</d>
<d></d>
<d></d>
<d></d>
<d></d>
<d>0.26975234</d>
<d></d>
<d></d>
<d></d>
<d></d>
<d></d>
<d>0.28558392</d>
<d></d>
<d></d>
<d></d>
<d></d>
<d></d>
<d></d>
<d>0.65109505</d>
<d></d>
<d></d>
<d></d>
<d></d>
<d></d>
<d></d>
<d>0.6532703</d>
<d></d>
<d></d>
<d></d>
<d></d>
<d></d>
<d>0.61122429</d>
<d></d>
<d></d>
<d></d>
<d></d>
<d></d>
<d>0.34931878</d>
<d></d>
<d></d>
<d></d>
<d></d>
<d></d>
<d></d>
<d>0.60390802</d>
<d></d>
<d></d>
<d></d>
<d></d>
<d></d>
<d>0.63551283</d>
<d></d>
<d></d>
<d></d>
<d></d>
<d></d>
<d>0.49423824</d>
<d></d>
<d></d>
<d></d>
<d></d>
<d></d>
<d>0.4396978</d>
<d></d>
<d></d>
<d></d>
<d></d>
<d></d>
<d></d>
<d></d>
<d>0.61385051</d>
<d></d>
<d></d>
<d></d>
<d></d>
<d></d>
<d></d>
<d>0.86958575</d>
<d></d>
<d></d>
<d></d>
<d></d>
<d></d>
<d>0.66301118</d>
<d></d>
<d></d>
<d></d>
<d></d>
<d></d>
<d>0.25959233</d>
<d></d>
<d></d>
<d></d>
<d></d>
<d></d>
<d></d>
<d>0.42933618</d>
<d></d>
<d></d>
<d></d>
<d></d>
<d></d>
<d>0.58742387</d>
<d></d>
<d></d>
<d></d>
<d></d>
<d></d>
<d>0.51241485</d>
<d></d>
<d></d>
<d></d>
<d></d>
<d></d>
<d>0.54051272</d>
<d></d>
<d></d>
<d></d>
<d></d>
<d></d>
<d></d>
<d>0.3794911</d>
<d></d>
<d></d>
<d></d>
<d></d>
<d></d>
<d></d>
<d>0.37632372</d>
<d></d>
<d></d>
<d></d>
<d></d>
<d></d>
<d>0.71393858</d>
<d></d>
<d></d>
<d></d>
<d></d>
<d></d>
<d></d>
<d>0.87638208</d>
<d></d>
<d></d>
<d></d>
<d></d>
<d></d>
<d>0.89212877</d>
<d></d>
<d></d>
<d></d>
<d></d>
<d></d>
<d></d>
<d>0.9593175</d>
<d></d>
<d></d>
<d></d>
<d></d>
<d></d>
<d>0.74167038</d>
<d></d>
<d></d>
<d></d>
<d></d>
<d></d>
<d>0.59560493</d>
<d></d>
<d></d>
<d></d>
<d></d>
<d></d>
<d></d>
<d>0.47424715</d>
<d></d>
<d></d>
<d></d>
<d></d>
<d></d>
<d></d>
<d></d>
<d>0.50012203</d>
<d></d>
<d></d>
<d></d>
<d></d>
<d></d>
<d>0.66595043</d>
<d></d>
<d></d>
<d></d>
<d></d>
<d></d>
<d>0.87982004</d>
<d></d>
<d></d>
<d></d>
<d></d>
<d>0.7762887</d>
<d></d>
<d></d>
<d></d>
<d></d>
<d></d>
<d></d>
<d>0.79142527</d>
<d></d>
<d></d>
<d></d>
<d></d>
<d></d>
<d>0.74233887</d>
<d></d>
<d></d>
<d></d>
<d></d>
<d></d>
<d>0.99648777</d>
<d></d>
<d></d>
<d></d>
<d></d>
<d></d>
<d>0.86993591</d>
<d></d>
<d></d>
<d></d>
<d></d>
<d></d>
<d></d>
<d></d>
<d>0.97974364</d>
<d></d>
<d></d>
<d></d>
<d></d>
<d></d>
<d>0.58734959</d>
<d></d>
<d></d>
<d></d>
<d></d>
<d></d>
<d></d>
<d>0.83504701</d>
<d></d>
<d></d>
<d></d>
<d></d>
<d></d>
<d>0.73416311</d>
<d></d>
<d></d>
<d></d>
<d></d>
<d></d>
<d></d>
<d>0.59559432</d>
<d></d>
<d></d>
<d></d>
<d></d>
<d></d>
<d>0.72053331</d>
<d></d>
<d></d>
<d></d>
<d></d>
<d></d>
<d>0.73149445</d>
<d></d>
<d></d>
<d></d>
<d></d>
<d></d>
<d>0.55808451</d>
<d></d>
<d></d>
<d></d>
<d></d>
<d></d>
<d></d>
<d></d>
<d></d>
<d>0.82617623</d>
<d></d>
<d></d>
<d></d>
<d></d>
<d></d>
<d>0.52887778</d>
<d></d>
<d></d>
<d></d>
<d></d>
<d>0.49423824</d>
<d></d>
<d></d>
<d></d>
<d></d>
<d></d>
<d>0.70758261</d>
<d></d>
<d></d>
<d></d>
<d></d>
<d></d>
<d></d>
<d>0.60933554</d>
<d></d>
<d></d>
<d></d>
<d></d>
<d></d>
<d></d>
<d>0.57966724</d>
<d></d>
<d></d>
<d></d>
<d></d>
<d></d>
<d>0.76656374</d>
<d></d>
<d></d>
<d></d>
<d></d>
<d></d>
<d>0.52354046</d>
<d></d>
<d></d>
<d></d>
<d></d>
<d></d>
<d></d>
<d></d>
<d>0.72396596</d>
<d></d>
<d></d>
<d></d>
<d></d>
<d></d>
<d>0.53588634</d>
<d></d>
<d></d>
<d></d>
<d></d>
<d></d>
<d>0.67825916</d>
<d></d>
<d></d>
<d></d>
<d></d>
<d></d>
<d></d>
<d>0.53819953</d>
<d></d>
<d></d>
<d></d>
<d></d>
<d></d>
<d></d>
<d>0.55834447</d>
<d></d>
<d></d>
<d></d>
<d></d>
<d></d>
<d>0.60415208</d>
<d></d>
<d></d>
<d></d>
<d></d>
<d></d>
<d>0.30983001</d>
<d></d>
<d></d>
<d></d>
<d></d>
<d></d>
<d>0.40564716</d>
<d></d>
<d></d>
<d></d>
<d></d>
<d>0.84887842</d>
</Subcolumn>
</YColumn>
<YColumn Width="81" Decimals="8" Subcolumns="1">
<Title></Title>
<Subcolumn>
<d></d>
<d></d>
<d>0.78099141</d>
<d></d>
<d></d>
<d></d>
<d>0.86441245</d>
<d></d>
<d></d>
<d></d>
<d></d>
<d></d>
<d>0.73553771</d>
<d></d>
<d></d>
<d></d>
<d></d>
<d></d>
<d>0.72520631</d>
<d></d>
<d></d>
<d></d>
<d></d>
<d>0.35537341</d>
<d></d>
<d></d>
<d></d>
<d></d>
<d>0.52847458</d>
<d></d>
<d></d>
<d></d>
<d></d>
<d>0.47882212</d>
<d></d>
<d></d>
<d></d>
<d></d>
<d></d>
<d>0.76601125</d>
<d></d>
<d></d>
<d></d>
<d></d>
<d></d>
<d>0.76859596</d>
<d></d>
<d></d>
<d></d>
<d>0.73915259</d>
<d></d>
<d></d>
<d></d>
<d></d>
<d></d>
<d>0.51678574</d>
<d></d>
<d></d>
<d></d>
<d>0.49309195</d>
<d></d>
<d></d>
<d></d>
<d></d>
<d></d>
<d>0.52066094</d>
<d></d>
<d></d>
<d></d>
<d></d>
<d>0.46687667</d>
<d></d>
<d></d>
<d></d>
<d></d>
<d>0.38791472</d>
<d></d>
<d></d>
<d></d>
<d></d>
<d></d>
<d>0.38468662</d>
<d></d>
<d></d>
<d></d>
<d>0.45041262</d>
<d></d>
<d></d>
<d></d>
<d></d>
<d></d>
<d>0.69402244</d>
<d></d>
<d></d>
<d></d>
<d></d>
<d>0.67174559</d>
<d></d>
<d></d>
<d></d>
<d></d>
<d></d>
<d>0.62771255</d>
<d></d>
<d></d>
<d></d>
<d></d>
<d>0.42045602</d>
<d></d>
<d></d>
<d>0.50090558</d>
<d></d>
<d></d>
<d></d>
<d></d>
<d></d>
<d>0.30320318</d>
<d></d>
<d></d>
<d></d>
<d></d>
<d>0.39295025</d>
<d></d>
<d></d>
<d></d>
<d></d>
<d></d>
<d>0.52066094</d>
<d></d>
<d></d>
<d></d>
<d></d>
<d>0.24870857</d>
<d></d>
<d></d>
<d></d>
<d></d>
<d>0.52169483</d>
<d></d>
<d></d>
<d></d>
<d></d>
<d>0.33355028</d>
<d></d>
<d></d>
<d></d>
<d></d>
<d>0.33057879</d>
<d></d>
<d></d>
<d></d>
<d></d>
<d></d>
<d>0.41554694</d>
<d></d>
<d></d>
<d></d>
<d></d>
<d></d>
<d>0.50439029</d>
<d></d>
<d></d>
<d></d>
<d></d>
<d>0.53570432</d>
<d></d>
<d></d>
<d>0.38842794</d>
<d></d>
<d></d>
<d></d>
<d></d>
<d></d>
<d>0.38700728</d>
<d></d>
<d></d>
<d></d>
<d></d>
<d></d>
<d>0.40444198</d>
<d></d>
<d></d>
<d></d>
<d></d>
<d></d>
<d>0.52330887</d>
<d></d>
<d></d>
<d>0.54855349</d>
<d></d>
<d></d>
<d></d>
<d></d>
<d></d>
<d>0.48954029</d>
<d></d>
<d></d>
<d></d>
<d></d>
<d></d>
<d>0.39669529</d>
<d></d>
<d></d>
<d></d>
<d></d>
<d></d>
<d>0.48405104</d>
<d></d>
<d></d>
<d></d>
<d>0.65702576</d>
<d></d>
<d></d>
<d></d>
<d>0.62274024</d>
<d></d>
<d></d>
<d></d>
<d></d>
<d>0.54390473</d>
<d></d>
<d></d>
<d></d>
<d></d>
<d></d>
<d>0.34064986</d>
<d></d>
<d></d>
<d></d>
<d></d>
<d>0.41838826</d>
<d></d>
<d></d>
<d></d>
<d></d>
<d>0.26846766</d>
<d></d>
<d></d>
<d></d>
<d></d>
<d>0.2076433</d>
<d></d>
<d></d>
<d></d>
<d></d>
<d></d>
<d>0.12932474</d>
<d></d>
<d></d>
<d></d>
<d></d>
<d></d>
<d>0.14876027</d>
<d></d>
<d></d>
<d></d>
<d>0.20758008</d>
<d></d>
<d></d>
<d></d>
<d></d>
<d></d>
<d>0.13636482</d>
<d></d>
<d></d>
<d></d>
<d></d>
<d></d>
<d>0.10459706</d>
<d></d>
<d></d>
<d></d>
<d></d>
<d>0.16838919</d>
<d></d>
<d></d>
<d></d>
<d>0.239928</d>
<d></d>
<d></d>
<d></d>
<d></d>
<d>0.22778916</d>
<d></d>
<d></d>
<d></d>
<d></d>
<d></d>
<d>0.1533458</d>
<d></d>
<d></d>
<d></d>
<d></d>
<d>0.15289209</d>
<d></d>
<d></d>
<d></d>
<d></d>
<d>0.12609664</d>
<d></d>
<d></d>
<d></d>
<d></d>
<d>0.22029908</d>
<d></d>
<d></d>
<d></d>
<d></d>
<d></d>
<d>0.16309332</d>
<d></d>
<d></d>
<d></d>
<d></d>
<d>0.06508262</d>
<d></d>
<d></d>
<d></d>
<d></d>
<d>0.08122311</d>
<d></d>
<d></d>
<d></d>
<d></d>
<d>0.19369703</d>
<d></d>
<d></d>
<d></d>
<d>0.21326272</d>
<d></d>
<d></d>
<d></d>
<d></d>
<d></d>
<d>0.25206684</d>
<d></d>
<d></d>
<d></d>
<d></d>
<d>0.21971892</d>
<d></d>
<d></d>
<d></d>
<d></d>
<d></d>
<d>0.07902889</d>
<d></d>
<d></d>
<d></d>
<d>0.06172435</d>
<d></d>
<d></d>
<d></d>
<d></d>
<d>0.22623834</d>
<d></d>
<d></d>
<d></d>
<d></d>
<d></d>
<d>0.37364489</d>
<d></d>
<d></d>
<d></d>
<d></d>
<d></d>
<d>0.2463842</d>
<d></d>
<d></d>
<d></d>
<d></d>
<d></d>
<d>0.31617879</d>
<d></d>
<d></d>
<d>0.26033047</d>
<d></d>
<d></d>
<d></d>
<d></d>
<d></d>
<d>0.44169527</d>
<d></d>
<d></d>
<d></d>
<d></d>
<d>0.50594111</d>
<d></d>
<d></d>
<d></d>
<d></d>
<d></d>
<d>0.39340025</d>
<d></d>
<d></d>
<d></d>
<d>0.39049571</d>
<d></d>
<d></d>
<d></d>
<d></d>
<d>0.58619728</d>
<d></d>
<d></d>
<d></d>
<d></d>
<d></d>
<d>0.67871873</d>
<d></d>
<d></d>
<d></d>
<d></d>
<d></d>
<d>0.71610218</d>
<d></d>
<d></d>
<d></d>
<d>0.63223114</d>
<d></d>
<d></d>
<d></d>
<d></d>
<d>0.43407875</d>
<d></d>
<d></d>
<d></d>
<d></d>
<d>0.31327425</d>
<d></d>
<d></d>
<d></d>
<d></d>
<d></d>
<d>0.42219652</d>
<d></d>
<d></d>
<d></d>
<d>0.57644604</d>
<d></d>
<d></d>
<d></d>
<d></d>
<d>0.47727129</d>
<d></d>
<d></d>
<d></d>
<d></d>
<d></d>
<d>0.42174652</d>
<d></d>
<d></d>
<d></d>
<d></d>
<d>0.54216052</d>
<d></d>
<d></d>
<d></d>
<d></d>
<d></d>
<d>0.61570388</d>
<d></d>
<d></d>
<d></d>
<d>0.55785101</d>
<d></d>
<d></d>
<d></d>
<d></d>
<d></d>
<d>0.60433859</d>
<d></d>
<d></d>
<d></d>
<d></d>
<d></d>
<d>0.61744437</d>
<d></d>
<d></d>
<d></d>
<d></d>
<d>0.41838826</d>
<d></d>
<d></d>
<d></d>
<d></d>
<d>0.41838826</d>
<d></d>
<d></d>
<d></d>
<d>0.49767376</d>
<d></d>
<d></d>
<d></d>
<d></d>
<d></d>
<d>0.5233721</d>
<d></d>
<d></d>
<d></d>
<d></d>
<d></d>
<d>0.55785101</d>
<d></d>
<d></d>
<d></d>
<d></d>
<d>0.38248868</d>
<d></d>
<d></d>
<d></d>
<d>0.43517585</d>
<d></d>
<d></d>
<d></d>
<d></d>
<d></d>
<d>0.50845888</d>
<d></d>
<d></d>
<d></d>
<d>0.73346994</d>
<d></d>
<d></d>
<d></d>
<d></d>
<d></d>
<d>0.55171837</d>
<d></d>
<d></d>
<d></d>
<d></d>
<d></d>
<d>0.44395643</d>
<d></d>
<d></d>
<d></d>
<d>0.62293363</d>
<d></d>
<d></d>
<d></d>
<d></d>
<d></d>
<d>0.78099141</d>
<d></d>
<d></d>
<d></d>
<d>0.61479644</d>
<d></d>
<d></d>
<d></d>
<d></d>
<d></d>
<d>0.54829688</d>
<d></d>
<d></d>
<d></d>
<d></d>
<d>0.38048786</d>
<d></d>
<d></d>
<d></d>
<d>0.39049571</d>
<d></d>
<d></d>
<d></d>
<d></d>
<d></d>
<d>0.37797009</d>
<d></d>
<d></d>
<d></d>
<d></d>
<d></d>
<d>0.52169483</d>
<d></d>
<d></d>
<d></d>
<d></d>
<d></d>
<d>0.56714853</d>
<d></d>
<d></d>
<d></d>
<d>0.50413368</d>
<d></d>
<d></d>
<d></d>
<d></d>
<d>0.30100897</d>
<d></d>
<d></d>
<d></d>
<d></d>
<d></d>
<d>0.3463325</d>
<d></d>
<d></d>
<d></d>
<d></d>
<d>0.31159698</d>
<d></d>
<d></d>
<d></d>
<d></d>
<d>0.22520817</d>
<d></d>
<d></d>
<d></d>
<d></d>
<d>0.2981007</d>
<d></d>
<d></d>
<d></d>
<d></d>
<d>0.26937138</d>
<d></d>
<d></d>
<d></d>
<d></d>
<d></d>
<d>0.24812841</d>
<d></d>
<d></d>
<d>0.33471061</d>
<d></d>
<d></d>
<d></d>
<d></d>
<d></d>
<d>0.45409444</d>
<d></d>
<d></d>
<d></d>
<d></d>
<d></d>
<d>0.4137395</d>
<d></d>
<d></d>
<d></d>
<d></d>
<d>0.70719144</d>
<d></d>
<d></d>
<d></d>
<d></d>
<d>0.62500139</d>
<d></d>
<d></d>
<d></d>
<d></d>
<d>0.57154067</d>
<d></d>
<d></d>
<d></d>
<d></d>
<d>0.71358442</d>
<d></d>
<d></d>
<d></d>
<d></d>
<d></d>
<d>0.69473277</d>
<d></d>
<d></d>
<d></d>
<d>0.54132374</d>
<d></d>
<d></d>
<d></d>
<d></d>
<d>0.47998245</d>
<d></d>
<d></d>
<d></d>
<d></d>
<d></d>
<d>0.63094065</d>
<d></d>
<d></d>
<d></d>
<d></d>
<d></d>
<d>0.55339564</d>
<d></d>
<d></d>
<d></d>
<d></d>
<d></d>
<d>0.42768577</d>
<d></d>
<d></d>
<d></d>
<d>0.66858072</d>
<d></d>
<d></d>
<d></d>
<d></d>
<d>0.62525801</d>
<d></d>
<d></d>
<d></d>
<d></d>
<d></d>
<d>0.3655077</d>
<d></d>
<d></d>
<d></d>
<d></d>
<d>0.24793502</d>
<d></d>
<d></d>
<d></d>
<d></d>
<d>0.1423673</d>
<d></d>
<d></d>
<d></d>
<d>0.15805779</d>
<d></d>
<d></d>
<d></d>
<d></d>
<d></d>
<d>0.21636065</d>
<d></d>
<d></d>
<d></d>
<d>0.30681806</d>
<d></d>
<d></d>
<d></d>
<d></d>
<d></d>
<d>0.27311642</d>
<d></d>
<d></d>
<d></d>
<d></d>
<d></d>
<d>0.34091019</d>
<d></d>
<d></d>
<d></d>
<d>0.32799408</d>
<d></d>
<d></d>
<d></d>
<d></d>
<d></d>
<d>0.59504108</d>
<d></d>
<d></d>
<d></d>
<d></d>
<d>0.43982461</d>
<d></d>
<d></d>
<d></d>
<d></d>
<d></d>
<d>0.52970185</d>
<d></d>
<d></d>
<d></d>
<d>0.57586588</d>
<d></d>
<d></d>
<d></d>
<d></d>
<d>0.52686053</d>
<d></d>
<d></d>
<d></d>
<d></d>
<d>0.57967414</d>
<d></d>
<d></d>
<d></d>
<d></d>
<d></d>
<d>0.36027878</d>
<d></d>
<d></d>
<d></d>
<d></d>
<d></d>
<d>0.3431044</d>
<d></d>
<d></d>
<d></d>
<d>0.42561801</d>
<d></d>
<d></d>
<d></d>
<d></d>
<d></d>
<d>0.43988783</d>
<d></d>
<d></d>
<d></d>
<d></d>
<d>0.33935936</d>
<d></d>
<d></d>
<d></d>
<d></d>
<d></d>
<d>0.25277717</d>
<d></d>
<d></d>
<d></d>
<d></d>
<d>0.26962799</d>
<d></d>
<d></d>
<d></d>
<d>0.30197591</d>
<d></d>
<d></d>
<d></d>
<d></d>
<d></d>
<d>0.25232345</d>
<d></d>
<d></d>
<d></d>
<d></d>
<d>0.23650651</d>
<d></d>
<d></d>
<d>0.25206684</d>
<d></d>
<d></d>
<d></d>
<d></d>
<d></d>
<d>0.15889828</d>
<d></d>
<d></d>
<d></d>
<d></d>
<d></d>
<d>0.22546478</d>
<d></d>
<d></d>
<d></d>
<d></d>
<d></d>
<d>0.49586632</d>
<d></d>
<d></d>
<d></d>
<d>0.64359643</d>
<d></d>
<d></d>
<d></d>
<d></d>
<d>0.39165604</d>
<d></d>
<d></d>
<d></d>
<d></d>
<d></d>
<d>0.60149727</d>
<d></d>
<d></d>
<d></d>
<d></d>
<d>0.34930399</d>
<d></d>
<d></d>
<d></d>
<d></d>
<d>0.33471061</d>
<d></d>
<d></d>
<d></d>
<d>0.54907043</d>
<d></d>
<d></d>
<d></d>
<d></d>
<d></d>
<d>0.42665189</d>
<d></d>
<d></d>
<d></d>
<d></d>
<d></d>
<d>0.65896336</d>
<d></d>
<d></d>
<d></d>
<d></d>
<d></d>
<d>0.56094894</d>
<d></d>
<d></d>
<d></d>
<d></d>
<d>0.60860057</d>
<d></d>
<d></d>
<d></d>
<d>0.44628081</d>
<d></d>
<d></d>
<d></d>
<d></d>
<d></d>
<d>0.42787916</d>
<d></d>
<d></d>
<d></d>
<d></d>
<d></d>
<d>0.55785101</d>
<d></d>
<d></d>
<d></d>
<d></d>
<d>0.46022708</d>
<d></d>
<d></d>
<d></d>
<d>0.61002124</d>
<d></d>
<d></d>
<d></d>
<d></d>
<d>0.69821748</d>
<d></d>
<d></d>
<d></d>
<d>0.83677651</d>
<d></d>
<d></d>
<d></d>
<d></d>
<d></d>
<d>0.80223438</d>
<d></d>
<d></d>
<d></d>
<d></d>
<d></d>
<d>0.7820253</d>
<d></d>
<d></d>
<d></d>
<d></d>
<d>0.62467784</d>
<d></d>
<d></d>
<d></d>
<d></d>
<d>0.48760269</d>
<d></d>
<d></d>
<d></d>
<d></d>
<d>0.4914779</d>
<d></d>
<d></d>
<d></d>
<d></d>
<d></d>
<d>0.38584695</d>
<d></d>
<d></d>
<d></d>
<d></d>
<d>0.4424056</d>
<d></d>
<d></d>
<d></d>
<d>0.58781133</d>
<d></d>
<d></d>
<d></d>
<d></d>
<d>0.44512048</d>
<d></d>
<d></d>
<d></d>
<d></d>
<d></d>
<d>0.37913042</d>
<d></d>
<d></d>
<d></d>
<d></d>
<d></d>
<d>0.787191</d>
<d></d>
<d></d>
<d></d>
<d>0.70661128</d>
<d></d>
<d></d>
<d></d>
<d></d>
<d></d>
<d>0.68369104</d>
<d></d>
<d></d>
<d></d>
<d></d>
<d></d>
<d>0.47081509</d>
<d></d>
<d></d>
<d></d>
<d></d>
<d>0.44628081</d>
<d></d>
<d></d>
<d></d>
<d></d>
<d>0.66115758</d>
<d></d>
<d></d>
<d></d>
<d></d>
<d>0.64927535</d>
<d></d>
<d></d>
<d></d>
<d></d>
<d></d>
<d>0.79493769</d>
<d></d>
<d></d>
<d></d>
<d></d>
<d>0.9306554</d>
<d></d>
<d>1</d>
<d></d>
<d></d>
<d></d>
<d></d>
<d></d>
<d>0.87803517</d>
<d></d>
<d></d>
<d></d>
<d></d>
<d></d>
<d>0.80113727</d>
<d></d>
<d></d>
<d></d>
<d></d>
<d></d>
<d>0.77253439</d>
<d></d>
<d></d>
<d></d>
<d></d>
<d>0.81818148</d>
<d></d>
<d></d>
<d></d>
<d>0.61408983</d>
<d></d>
<d></d>
<d></d>
<d></d>
<d></d>
<d>0.27195237</d>
<d></d>
<d></d>
<d></d>
<d></d>
<d></d>
<d>0.62351379</d>
<d></d>
<d></d>
<d></d>
<d></d>
<d>0.8429761</d>
<d></d>
<d></d>
<d></d>
<d>0.6067262</d>
<d></d>
<d></d>
<d></d>
<d></d>
<d>0.7042869</d>
<d></d>
<d></d>
<d></d>
<d></d>
<d></d>
<d>0.919874</d>
<d></d>
<d></d>
<d></d>
<d></d>
<d></d>
<d>0.76239638</d>
<d></d>
<d></d>
<d></d>
<d></d>
<d>0.50206591</d>
<d></d>
<d></d>
<d></d>
<d></d>
<d>0.32825441</d>
<d></d>
<d></d>
<d></d>
<d></d>
<d>0.67297286</d>
<d></d>
<d></d>
<d></d>
<d></d>
<d></d>
<d>0.78099141</d>
<d></d>
<d></d>
<d></d>
<d></d>
<d>0.76781869</d>
<d></d>
<d></d>
<d></d>
<d></d>
<d>0.692665</d>
<d></d>
<d></d>
<d></d>
<d></d>
<d></d>
<d>0.89314178</d>
<d></d>
<d>0.63739684</d>
<d></d>
<d></d>
<d></d>
<d></d>
<d></d>
<d>0.8556951</d>
<d></d>
<d></d>
<d></d>
<d></d>
<d></d>
<d>0.79028893</d>
<d></d>
<d></d>
<d></d>
<d></d>
<d>0.67038815</d>
<d></d>
<d></d>
<d></d>
<d></d>
<d></d>
<d>0.51239731</d>
<d></d>
<d></d>
<d></d>
<d>0.72055755</d>
<d></d>
<d></d>
<d></d>
<d></d>
<d></d>
<d>0.64178527</d>
<d></d>
<d></d>
<d></d>
<d></d>
<d>0.5014188</d>
<d></d>
<d></d>
<d></d>
<d></d>
<d>0.58574356</d>
<d></d>
<d></d>
<d></d>
<d></d>
<d></d>
<d>0.64669436</d>
<d></d>
<d></d>
<d></d>
<d>0.70403029</d>
<d></d>
<d></d>
<d></d>
<d></d>
<d></d>
<d>0.78041125</d>
<d></d>
<d></d>
<d></d>
<d>0.66115758</d>
<d></d>
<d></d>
<d></d>
<d></d>
<d></d>
<d>0.62467784</d>
<d></d>
<d></d>
<d></d>
<d></d>
<d></d>
<d>0.52298532</d>
<d></d>
<d></d>
<d></d>
<d></d>
<d>0.46397212</d>
<d></d>
<d></d>
<d></d>
<d></d>
<d>0.55888489</d>
<d></d>
<d></d>
<d></d>
<d></d>
<d>0.43175437</d>
<d></d>
<d></d>
<d></d>
<d></d>
<d></d>
<d>0.35821101</d>
<d></d>
<d></d>
<d></d>
<d></d>
<d></d>
<d>0.39675851</d>
<d></d>
<d></d>
<d>0.40909074</d>
</Subcolumn>
</YColumn>
<YColumn Width="81" Decimals="8" Subcolumns="1">
<Title></Title>
<Subcolumn>
<d></d>
<d></d>
<d></d>
<d>0.74904964</d>
<d></d>
<d></d>
<d></d>
<d></d>
<d>0.43468474</d>
<d></d>
<d></d>
<d></d>
<d></d>
<d></d>
<d>0.58267074</d>
<d></d>
<d></d>
<d></d>
<d></d>
<d></d>
<d>0.55406828</d>
<d></d>
<d></d>
<d></d>
<d></d>
<d></d>
<d>0.6415011</d>
<d></d>
<d></d>
<d></d>
<d></d>
<d></d>
<d>1</d>
<d></d>
<d></d>
<d></d>
<d></d>
<d>0.72469055</d>
<d></d>
<d></d>
<d></d>
<d></d>
<d></d>
<d>0.80462538</d>
<d></d>
<d></d>
<d></d>
<d></d>
<d>0.54307223</d>
<d></d>
<d></d>
<d></d>
<d></d>
<d></d>
<d>0.3990562</d>
<d></d>
<d></d>
<d></d>
<d></d>
<d></d>
<d>0.55932286</d>
<d></d>
<d></d>
<d></d>
<d></d>
<d></d>
<d>0.50004682</d>
<d></d>
<d></d>
<d></d>
<d></d>
<d>0.6633696</d>
<d></d>
<d></d>
<d></d>
<d></d>
<d></d>
<d>0.66839947</d>
<d></d>
<d></d>
<d></d>
<d></d>
<d></d>
<d>0.61615326</d>
<d></d>
<d></d>
<d></d>
<d></d>
<d>0.62882718</d>
<d></d>
<d></d>
<d></d>
<d></d>
<d></d>
<d>0.53503492</d>
<d></d>
<d></d>
<d></d>
<d></d>
<d></d>
<d>0.57783937</d>
<d></d>
<d></d>
<d></d>
<d></d>
<d>0.6889871</d>
<d></d>
<d></d>
<d></d>
<d></d>
<d></d>
<d>0.45377053</d>
<d></d>
<d></d>
<d></d>
<d></d>
<d></d>
<d></d>
<d>0.41370386</d>
<d></d>
<d></d>
<d></d>
<d></d>
<d></d>
<d>0.3551956</d>
<d></d>
<d></d>
<d></d>
<d></d>
<d>0.59470422</d>
<d></d>
<d></d>
<d></d>
<d></d>
<d></d>
<d>0.8217112</d>
<d></d>
<d></d>
<d></d>
<d></d>
<d>0.71997903</d>
<d></d>
<d></d>
<d></d>
<d></d>
<d></d>
<d>0.62209696</d>
<d></d>
<d></d>
<d></d>
<d></d>
<d></d>
<d>0.37511657</d>
<d></d>
<d></d>
<d></d>
<d></d>
<d></d>
<d>0.35697084</d>
<d></d>
<d></d>
<d></d>
<d>0.66447819</d>
<d></d>
<d></d>
<d></d>
<d></d>
<d></d>
<d></d>
<d>0.57295556</d>
<d></d>
<d></d>
<d></d>
<d></d>
<d>0.58804517</d>
<d></d>
<d></d>
<d></d>
<d></d>
<d></d>
<d>0.43108556</d>
<d></d>
<d></d>
<d></d>
<d></d>
<d></d>
<d>0.45150091</d>
<d></d>
<d></d>
<d></d>
<d></d>
<d></d>
<d>0.70876201</d>
<d></d>
<d></d>
<d></d>
<d></d>
<d></d>
<d>0.45463194</d>
<d></d>
<d></d>
<d></d>
<d></d>
<d></d>
<d>0.58353214</d>
<d></d>
<d></d>
<d></d>
<d>0.46767664</d>
<d></d>
<d></d>
<d></d>
<d></d>
<d>0.40896987</d>
<d></d>
<d></d>
<d></d>
<d></d>
<d></d>
<d></d>
<d>0.41101478</d>
<d></d>
<d></d>
<d></d>
<d></d>
<d></d>
<d>0.5553529</d>
<d></d>
<d></d>
<d></d>
<d></d>
<d></d>
<d></d>
<d>0.44479317</d>
<d></d>
<d></d>
<d></d>
<d></d>
<d></d>
<d>0.52852568</d>
<d></d>
<d></d>
<d></d>
<d></d>
<d>0.39868916</d>
<d></d>
<d></d>
<d></d>
<d></d>
<d>0.47171776</d>
<d></d>
<d></d>
<d></d>
<d></d>
<d></d>
<d>0.34059662</d>
<d></d>
<d></d>
<d></d>
<d></d>
<d></d>
<d>0.47630569</d>
<d></d>
<d></d>
<d></d>
<d></d>
<d>0.48397221</d>
<d></d>
<d></d>
<d></d>
<d></d>
<d>0.43974083</d>
<d></d>
<d></d>
<d></d>
<d></d>
<d></d>
<d></d>
<d>0.43167731</d>
<d></d>
<d></d>
<d></d>
<d></d>
<d>0.46392764</d>
<d></d>
<d></d>
<d></d>
<d></d>
<d></d>
<d>0.523743</d>
<d></d>
<d></d>
<d></d>
<d></d>
<d></d>
<d>0.54487369</d>
<d></d>
<d></d>
<d></d>
<d></d>
<d></d>
<d>0.44176326</d>
<d></d>
<d></d>
<d></d>
<d></d>
<d>0.5375742</d>
<d></d>
<d></d>
<d></d>
<d></d>
<d></d>
<d>0.44550851</d>
<d></d>
<d></d>
<d></d>
<d></d>
<d>0.46878523</d>
<d></d>
<d></d>
<d></d>
<d></d>
<d>0.43130653</d>
<d></d>
<d></d>
<d></d>
<d></d>
<d></d>
<d></d>
<d>0.34087002</d>
<d></d>
<d></d>
<d></d>
<d></d>
<d></d>
<d>0.27769892</d>
<d></d>
<d></d>
<d></d>
<d></d>
<d>0.27054924</d>
<d></d>
<d></d>
<d></d>
<d></d>
<d></d>
<d></d>
<d>0.26581525</d>
<d></d>
<d></d>
<d></d>
<d></d>
<d></d>
<d>0.33213985</d>
<d></d>
<d></d>
<d></d>
<d></d>
<d></d>
<d>0.27515964</d>
<d></d>
<d></d>
<d></d>
<d></d>
<d>0.27303983</d>
<d></d>
<d></d>
<d></d>
<d></d>
<d>0.31564577</d>
<d></d>
<d></d>
<d></d>
<d></d>
<d>0.29811427</d>
<d></d>
<d></d>
<d></d>
<d></d>
<d></d>
<d>0.41602217</d>
<d></d>
<d></d>
<d></d>
<d></d>
<d></d>
<d></d>
<d>0.28243291</d>
<d></d>
<d></d>
<d></d>
<d></d>
<d></d>
<d>0.36042022</d>
<d></d>
<d></d>
<d></d>
<d></d>
<d></d>
<d>0.26448568</d>
<d></d>
<d></d>
<d></d>
<d></d>
<d>0.20296998</d>
<d></d>
<d></d>
<d></d>
<d></d>
<d>0.21356903</d>
<d></d>
<d></d>
<d></d>
<d></d>
<d></d>
<d>0.26623471</d>
<d></d>
<d></d>
<d></d>
<d></d>
<d>0.32659313</d>
<d></d>
<d></d>
<d></d>
<d></d>
<d></d>
<d>0.27817082</d>
<d></d>
<d></d>
<d></d>
<d></d>
<d></d>
<d>0.35021442</d>
<d></d>
<d></d>
<d></d>
<d></d>
<d></d>
<d></d>
<d>0.31384806</d>
<d></d>
<d></d>
<d></d>
<d></d>
<d>0.40473025</d>
<d></d>
<d></d>
<d></d>
<d></d>
<d>0.43189828</d>
<d></d>
<d></d>
<d></d>
<d></d>
<d></d>
<d></d>
<d>0.28130185</d>
<d></d>
<d></d>
<d></d>
<d></d>
<d></d>
<d>0.33884759</d>
<d></d>
<d></d>
<d></d>
<d></d>
<d></d>
<d>0.33840565</d>
<d></d>
<d></d>
<d></d>
<d></d>
<d>0.50367222</d>
<d></d>
<d></d>
<d></d>
<d></d>
<d>0.26436209</d>
<d></d>
<d></d>
<d></d>
<d></d>
<d></d>
<d>0.26579278</d>
<d></d>
<d></d>
<d></d>
<d></d>
<d></d>
<d>0.43658358</d>
<d></d>
<d></d>
<d></d>
<d></d>
<d></d>
<d>0.5479785</d>
<d></d>
<d></d>
<d></d>
<d></d>
<d></d>
<d>0.57976068</d>
<d></d>
<d></d>
<d></d>
<d></d>
<d>0.52028988</d>
<d></d>
<d></d>
<d></d>
<d></d>
<d></d>
<d>0.6353102</d>
<d></d>
<d></d>
<d></d>
<d></d>
<d></d>
<d>0.37694051</d>
<d></d>
<d></d>
<d></d>
<d></d>
<d>0.23196195</d>
<d></d>
<d></d>
<d></d>
<d></d>
<d>0.31438737</d>
<d></d>
<d></d>
<d></d>
<d></d>
<d></d>
<d>0.24305912</d>
<d></d>
<d></d>
<d></d>
<d></d>
<d>0.38724743</d>
<d></d>
<d></d>
<d></d>
<d></d>
<d></d>
<d></d>
<d>0.44745604</d>
<d></d>
<d></d>
<d></d>
<d></d>
<d></d>
<d>0.34755154</d>
<d></d>
<d></d>
<d></d>
<d></d>
<d></d>
<d>0.27784873</d>
<d></d>
<d></d>
<d></d>
<d></d>
<d>0.3201588</d>
<d></d>
<d></d>
<d></d>
<d></d>
<d></d>
<d></d>
<d>0.32651823</d>
<d></d>
<d></d>
<d></d>
<d>0.57591431</d>
<d></d>
<d></d>
<d></d>
<d></d>
<d></d>
<d>0.42862119</d>
<d></d>
<d></d>
<d></d>
<d></d>
<d></d>
<d>0.40477894</d>
<d></d>
<d></d>
<d></d>
<d></d>
<d></d>
<d>0.53417352</d>
<d></d>
<d></d>
<d></d>
<d></d>
<d></d>
<d></d>
<d>0.49514054</d>
<d></d>
<d></d>
<d></d>
<d></d>
<d></d>
<d>0.59440834</d>
<d></d>
<d></d>
<d></d>
<d>0.72296399</d>
<d></d>
<d></d>
<d></d>
<d></d>
<d></d>
<d>0.58143855</d>
<d></d>
<d></d>
<d></d>
<d></d>
<d></d>
<d>0.63494317</d>
<d></d>
<d></d>
<d></d>
<d></d>
<d>0.7693414</d>
<d></d>
<d></d>
<d></d>
<d></d>
<d></d>
<d>0.56474598</d>
<d></d>
<d></d>
<d></d>
<d></d>
<d></d>
<d>0.49013689</d>
<d></d>
<d></d>
<d></d>
<d>0.37573454</d>
<d></d>
<d></d>
<d></d>
<d></d>
<d></d>
<d>0.53811726</d>
<d></d>
<d></d>
<d></d>
<d></d>
<d></d>
<d></d>
<d>0.54514335</d>
<d></d>
<d></d>
<d></d>
<d></d>
<d></d>
<d>0.51728245</d>
<d></d>
<d></d>
<d></d>
<d></d>
<d></d>
<d>0.39743076</d>
<d></d>
<d></d>
<d></d>
<d></d>
<d></d>
<d>0.41809329</d>
<d></d>
<d></d>
<d></d>
<d>0.56647254</d>
<d></d>
<d></d>
<d></d>
<d></d>
<d></d>
<d>0.41801839</d>
<d></d>
<d></d>
<d></d>
<d></d>
<d></d>
<d>0.30267598</d>
<d></d>
<d></d>
<d></d>
<d></d>
<d></d>
<d>0.2641149</d>
<d></d>
<d></d>
<d></d>
<d></d>
<d></d>
<d>0.32580289</d>
<d></d>
<d></d>
<d></d>
<d></d>
<d></d>
<d></d>
<d>0.33034213</d>
<d></d>
<d></d>
<d></d>
<d></d>
<d>0.34012846</d>
<d></d>
<d></d>
<d></d>
<d></d>
<d></d>
<d>0.36365237</d>
<d></d>
<d></d>
<d></d>
<d></d>
<d></d>
<d>0.39868916</d>
<d></d>
<d></d>
<d></d>
<d>0.42452763</d>
<d></d>
<d></d>
<d></d>
<d></d>
<d></d>
<d>0.23654988</d>
<d></d>
<d></d>
<d></d>
<d></d>
<d></d>
<d>0.53570158</d>
<d></d>
<d></d>
<d></d>
<d></d>
<d>0.52046216</d>
<d></d>
<d></d>
<d></d>
<d></d>
<d></d>
<d>0.53824086</d>
<d></d>
<d></d>
<d></d>
<d></d>
<d></d>
<d>0.49304695</d>
<d></d>
<d></d>
<d></d>
<d></d>
<d></d>
<d>0.41922436</d>
<d></d>
<d></d>
<d></d>
<d></d>
<d></d>
<d>0.58234865</d>
<d></d>
<d></d>
<d></d>
<d></d>
<d>0.74769386</d>
<d></d>
<d></d>
<d></d>
<d></d>
<d>0.53545439</d>
<d></d>
<d></d>
<d></d>
<d></d>
<d></d>
<d>0.45763937</d>
<d></d>
<d></d>
<d></d>
<d></d>
<d></d>
<d>0.49247767</d>
<d></d>
<d></d>
<d></d>
<d></d>
<d></d>
<d></d>
<d>0.35955881</d>
<d></d>
<d></d>
<d></d>
<d></d>
<d>0.24283815</d>
<d></d>
<d></d>
<d></d>
<d></d>
<d>0.30630138</d>
<d></d>
<d></d>
<d></d>
<d></d>
<d></d>
<d></d>
<d>0.30854478</d>
<d></d>
<d></d>
<d></d>
<d></d>
<d></d>
<d>0.34520702</d>
<d></d>
<d></d>
<d></d>
<d></d>
<d></d>
<d>0.26917099</d>
<d></d>
<d></d>
<d></d>
<d></d>
<d>0.61134436</d>
<d></d>
<d></d>
<d></d>
<d></d>
<d></d>
<d>0.28541788</d>
<d></d>
<d></d>
<d></d>
<d>0.36244265</d>
<d></d>
<d></d>
<d></d>
<d></d>
<d></d>
<d>0.38093669</d>
<d></d>
<d></d>
<d></d>
<d></d>
<d></d>
<d>0.34757402</d>
<d></d>
<d></d>
<d></d>
<d></d>
<d></d>
<d>0.39922848</d>
<d></d>
<d></d>
<d></d>
<d></d>
<d></d>
<d></d>
<d>0.52906874</d>
<d></d>
<d></d>
<d></d>
<d></d>
<d></d>
<d>0.40859909</d>
<d></d>
<d></d>
<d></d>
<d></d>
<d>0.51121889</d>
<d></d>
<d></d>
<d></d>
<d></d>
<d>0.64998034</d>
<d></d>
<d></d>
<d></d>
<d></d>
<d>0.57707534</d>
<d></d>
<d></d>
<d></d>
<d></d>
<d></d>
<d>0.46069924</d>
<d></d>
<d></d>
<d></d>
<d></d>
<d></d>
<d>0.42060636</d>
<d></d>
<d></d>
<d></d>
<d></d>
<d></d>
<d></d>
<d>0.38480553</d>
<d></d>
<d></d>
<d></d>
<d></d>
<d>0.39511245</d>
<d></d>
<d></d>
<d></d>
<d></d>
<d></d>
<d>0.49247767</d>
<d></d>
<d></d>
<d></d>
<d></d>
<d></d>
<d></d>
<d>0.78529241</d>
<d></d>
<d></d>
<d></d>
<d></d>
<d>0.28063519</d>
<d></d>
<d></d>
<d></d>
<d></d>
<d>0.32033108</d>
<d></d>
<d></d>
<d></d>
<d></d>
<d></d>
<d>0.40879759</d>
<d></d>
<d></d>
<d></d>
<d></d>
<d>0.43502931</d>
<d></d>
<d></d>
<d></d>
<d></d>
<d></d>
<d>0.5119567</d>
<d></d>
<d></d>
<d></d>
<d></d>
<d></d>
<d>0.34873504</d>
<d></d>
<d></d>
<d></d>
<d></d>
<d>0.32257448</d>
<d></d>
<d></d>
<d></d>
<d></d>
<d></d>
<d>0.38066328</d>
<d></d>
<d></d>
<d></d>
<d></d>
<d></d>
<d></d>
<d>0.52263441</d>
<d></d>
<d></d>
<d></d>
<d></d>
<d>0.57204547</d>
<d></d>
<d></d>
<d></d>
<d></d>
<d>0.93922211</d>
<d></d>
<d></d>
<d></d>
<d></d>
<d></d>
<d>0.47509597</d>
<d></d>
<d></d>
<d></d>
<d></d>
<d></d>
<d>0.48678489</d>
<d></d>
<d></d>
<d></d>
<d></d>
<d></d>
<d>0.51466826</d>
<d></d>
<d></d>
<d></d>
<d>0.5159042</d>
<d></d>
<d></d>
<d></d>
<d></d>
<d></d>
<d>0.56910919</d>
<d></d>
<d></d>
<d></d>
<d></d>
<d></d>
<d></d>
<d>0.54632685</d>
<d></d>
<d></d>
<d></d>
<d></d>
<d></d>
<d>0.36614296</d>
<d></d>
<d></d>
<d></d>
<d></d>
<d></d>
<d></d>
<d>0.53200127</d>
<d></d>
<d></d>
<d></d>
<d></d>
<d>0.67162787</d>
<d></d>
<d></d>
<d></d>
<d>0.65723114</d>
<d></d>
<d></d>
<d></d>
<d></d>
<d></d>
<d>0.46121608</d>
<d></d>
<d></d>
<d></d>
<d></d>
<d></d>
<d>0.55439037</d>
<d></d>
<d></d>
<d></d>
<d></d>
<d></d>
<d>0.59394019</d>
<d></d>
<d></d>
<d></d>
<d></d>
<d></d>
<d>0.56943128</d>
<d></d>
<d></d>
<d></d>
<d></d>
<d></d>
<d>0.56541263</d>
<d></d>
<d></d>
<d></d>
<d></d>
<d>0.63427651</d>
<d></d>
<d></d>
<d></d>
<d></d>
<d></d>
<d>0.52796015</d>
<d></d>
<d></d>
<d></d>
<d></d>
<d>0.45029119</d>
<d></d>
<d></d>
<d></d>
<d></d>
<d></d>
<d>0.41286493</d>
<d></d>
<d></d>
<d></d>
<d></d>
<d></d>
<d>0.47127582</d>
<d></d>
<d></d>
<d></d>
<d></d>
<d></d>
<d>0.38058838</d>
<d></d>
<d></d>
<d></d>
<d></d>
<d>0.34883242</d>
<d></d>
<d></d>
<d></d>
<d></d>
<d></d>
<d>0.28018951</d>
<d></d>
<d></d>
<d></d>
<d></d>
<d></d>
<d>0.56057752</d>
<d></d>
<d></d>
<d></d>
<d></d>
<d>0.48084118</d>
<d></d>
<d></d>
<d></d>
<d></d>
<d></d>
<d></d>
<d>0.38741971</d>
<d></d>
<d></d>
<d></d>
<d></d>
<d></d>
<d>0.37299676</d>
<d></d>
<d></d>
<d></d>
<d></d>
<d>0.3084961</d>
<d></d>
<d></d>
<d></d>
<d></d>
<d></d>
<d>0.6087077</d>
<d></d>
<d></d>
<d></d>
<d></d>
<d></d>
<d>0.49733526</d>
<d></d>
<d></d>
<d></d>
<d></d>
<d>0.40714593</d>
<d></d>
<d></d>
<d></d>
<d></d>
<d></d>
<d>0.5479785</d>
<d></d>
<d></d>
<d></d>
<d></d>
<d></d>
<d>0.59657684</d>
<d></d>
<d></d>
<d></d>
<d></d>
<d>0.27619707</d>
<d></d>
<d></d>
<d></d>
<d></d>
<d></d>
<d>0.26860171</d>
<d></d>
<d></d>
<d></d>
<d></d>
<d></d>
<d>0.45223872</d>
<d></d>
<d></d>
<d></d>
<d></d>
<d></d>
<d>0.48720436</d>
<d></d>
<d></d>
<d></d>
<d></d>
<d>0.4470141</d>
<d></d>
<d></d>
<d></d>
<d></d>
<d></d>
<d>0.33004625</d>
<d></d>
<d></d>
<d></d>
<d></d>
<d>0.19988764</d>
<d></d>
<d></d>
<d></d>
<d></d>
<d></d>
<d>0.35664875</d>
<d></d>
<d></d>
<d></d>
<d></d>
<d></d>
<d>0.27738057</d>
<d></d>
<d></d>
<d></d>
<d></d>
<d></d>
<d>0.1956218</d>
<d></d>
<d></d>
<d></d>
<d></d>
<d></d>
<d>0.19724724</d>
<d></d>
<d></d>
<d></d>
<d></d>
<d></d>
<d>0.07490496</d>
</Subcolumn>
</YColumn>
<YColumn Width="81" Decimals="8" Subcolumns="1">
<Title></Title>
<Subcolumn>
<d></d>
<d></d>
<d></d>
<d></d>
<d>0.55952664</d>
<d></d>
<d></d>
<d></d>
<d></d>
<d></d>
<d></d>
<d>0.58249521</d>
<d></d>
<d></d>
<d></d>
<d></d>
<d></d>
<d>0.34020619</d>
<d></d>
<d></d>
<d></d>
<d></d>
<d></d>
<d></d>
<d>0.64811719</d>
<d></d>
<d></d>
<d></d>
<d></d>
<d></d>
<d></d>
<d>0.65290115</d>
<d></d>
<d></d>
<d></d>
<d></d>
<d></d>
<d></d>
<d>0.54247157</d>
<d></d>
<d></d>
<d></d>
<d></d>
<d></d>
<d>0.78411364</d>
<d></d>
<d></d>
<d></d>
<d></d>
<d></d>
<d></d>
<d>0.59289191</d>
<d></d>
<d></d>
<d></d>
<d></d>
<d></d>
<d></d>
<d>0.8074459</d>
<d></d>
<d></d>
<d></d>
<d></d>
<d></d>
<d>0.73997398</d>
<d></d>
<d></d>
<d></d>
<d></d>
<d></d>
<d></d>
<d></d>
<d>0.50901537</d>
<d></d>
<d></d>
<d></d>
<d></d>
<d></d>
<d>0.42254752</d>
<d></d>
<d></d>
<d></d>
<d></d>
<d></d>
<d></d>
<d></d>
<d>0.43487809</d>
<d></d>
<d></d>
<d></d>
<d></d>
<d></d>
<d>0.54060065</d>
<d></d>
<d></d>
<d></d>
<d></d>
<d></d>
<d></d>
<d>0.7877051</d>
<d></d>
<d></d>
<d></d>
<d></d>
<d></d>
<d></d>
<d></d>
<d></d>
<d>0.61392662</d>
<d></d>
<d></d>
<d></d>
<d></d>
<d></d>
<d>0.53462421</d>
<d></d>
<d></d>
<d></d>
<d></d>
<d></d>
<d>0.54080698</d>
<d></d>
<d></d>
<d></d>
<d></d>
<d></d>
<d>0.65044972</d>
<d></d>
<d></d>
<d></d>
<d></d>
<d></d>
<d></d>
<d></d>
<d>0.65617438</d>
<d></d>
<d></d>
<d></d>
<d></d>
<d></d>
<d></d>
<d>0.67997874</d>
<d></d>
<d></d>
<d></d>
<d></d>
<d></d>
<d></d>
<d>0.59395152</d>
<d></d>
<d></d>
<d></d>
<d></d>
<d></d>
<d>0.52538502</d>
<d></d>
<d></d>
<d></d>
<d></d>
<d></d>
<d></d>
<d>0.59651835</d>
<d></d>
<d></d>
<d></d>
<d></d>
<d></d>
<d></d>
<d>0.62837989</d>
<d></d>
<d></d>
<d></d>
<d></d>
<d></d>
<d></d>
<d>0.65666746</d>
<d></d>
<d></d>
<d></d>
<d></d>
<d></d>
<d>0.62381975</d>
<d></d>
<d></d>
<d></d>
<d></d>
<d></d>
<d></d>
<d></d>
<d>0.75046511</d>
<d></d>
<d></d>
<d></d>
<d></d>
<d></d>
<d></d>
<d>0.99934256</d>
<d></d>
<d></d>
<d></d>
<d></d>
<d></d>
<d>0.90348165</d>
<d></d>
<d></d>
<d></d>
<d></d>
<d></d>
<d></d>
<d></d>
<d></d>
<d>0.54398579</d>
<d></d>
<d></d>
<d></d>
<d></d>
<d></d>
<d></d>
<d>0.62102212</d>
<d></d>
<d></d>
<d></d>
<d></d>
<d></d>
<d>0.79428653</d>
<d></d>
<d></d>
<d></d>
<d></d>
<d></d>
<d></d>
<d>0.64578816</d>
<d></d>
<d></d>
<d></d>
<d></d>
<d></d>
<d></d>
<d>0.54584971</d>
<d></d>
<d></d>
<d></d>
<d></d>
<d></d>
<d></d>
<d>0.63572717</d>
<d></d>
<d></d>
<d></d>
<d></d>
<d></d>
<d>0.60428877</d>
<d></d>
<d></d>
<d></d>
<d></d>
<d></d>
<d></d>
<d>0.67566339</d>
<d></d>
<d></d>
<d></d>
<d></d>
<d></d>
<d></d>
<d>0.91130454</d>
<d></d>
<d></d>
<d></d>
<d></d>
<d></d>
<d></d>
<d>1</d>
<d></d>
<d></d>
<d></d>
<d></d>
<d></d>
<d></d>
<d>0.95585685</d>
<d></d>
<d></d>
<d></d>
<d></d>
<d></d>
<d>0.69824379</d>
<d></d>
<d></d>
<d></d>
<d></d>
<d></d>
<d></d>
<d></d>
<d></d>
<d>0.71091007</d>
<d></d>
<d></d>
<d></d>
<d></d>
<d></d>
<d>0.57453245</d>
<d></d>
<d></d>
<d></d>
<d></d>
<d></d>
<d></d>
<d>0.80321448</d>
<d></d>
<d></d>
<d></d>
<d></d>
<d></d>
<d></d>
<d></d>
<d>0.55952664</d>
<d></d>
<d></d>
<d></d>
<d></d>
<d></d>
<d>0.69348431</d>
<d></d>
<d></d>
<d></d>
<d></d>
<d></d>
<d>0.343969</d>
<d></d>
<d></d>
<d></d>
<d></d>
<d></d>
<d>0.79779057</d>
<d></d>
<d></d>
<d></d>
<d></d>
<d></d>
<d></d>
<d></d>
<d></d>
<d>0.41748731</d>
<d></d>
<d></d>
<d></d>
<d></d>
<d></d>
<d>0.44338989</d>
<d></d>
<d></d>
<d></d>
<d></d>
<d></d>
<d></d>
<d>0.37713494</d>
<d></d>
<d></d>
<d></d>
<d></d>
<d></d>
<d>0.41151086</d>
<d></d>
<d></d>
<d></d>
<d></d>
<d></d>
<d></d>
<d>0.55799843</d>
<d></d>
<d></d>
<d></d>
<d></d>
<d></d>
<d></d>
<d></d>
<d>0.48399054</d>
<d></d>
<d></d>
<d></d>
<d></d>
<d></d>
<d>0.7030767</d>
<d></d>
<d></d>
<d></d>
<d></d>
<d></d>
<d></d>
<d>0.75278714</d>
<d></d>
<d></d>
<d></d>
<d></d>
<d></d>
<d></d>
<d></d>
<d>0.76872666</d>
<d></d>
<d></d>
<d></d>
<d></d>
<d></d>
<d>0.72258319</d>
<d></d>
<d></d>
<d></d>
<d></d>
<d></d>
<d></d>
<d>0.73471443</d>
<d></d>
<d></d>
<d></d>
<d></d>
<d></d>
<d></d>
<d></d>
<d>0.6994083</d>
<d></d>
<d></d>
<d></d>
<d></d>
<d></d>
<d></d>
<d>0.53729944</d>
<d></d>
<d></d>
<d></d>
<d></d>
<d></d>
<d>0.55560646</d>
<d></d>
<d></d>
<d></d>
<d></d>
<d></d>
<d></d>
<d>0.56861895</d>
<d></d>
<d></d>
<d></d>
<d></d>
<d></d>
<d></d>
<d></d>
<d>0.55006365</d>
<d></d>
<d></d>
<d></d>
<d></d>
<d></d>
<d>0.53362405</d>
<d></d>
<d></d>
<d></d>
<d></d>
<d></d>
<d>0.56496804</d>
<d></d>
<d></d>
<d></d>
<d></d>
<d></d>
<d></d>
<d>0.80096938</d>
<d></d>
<d></d>
<d></d>
<d></d>
<d></d>
<d></d>
<d>0.81994782</d>
<d></d>
<d></d>
<d></d>
<d></d>
<d></d>
<d></d>
<d>0.65837751</d>
<d></d>
<d></d>
<d></d>
<d></d>
<d></d>
<d></d>
<d></d>
<d>0.62989761</d>
<d></d>
<d></d>
<d></d>
<d></d>
<d></d>
<d>0.61470296</d>
<d></d>
<d></d>
<d></d>
<d></d>
<d></d>
<d></d>
<d>0.44342486</d>
<d></d>
<d></d>
<d></d>
<d></d>
<d></d>
<d></d>
<d></d>
<d>0.45698989</d>
<d></d>
<d></d>
<d></d>
<d></d>
<d></d>
<d>0.5846354</d>
<d></d>
<d></d>
<d></d>
<d></d>
<d></d>
<d></d>
<d></d>
<d>0.63335268</d>
<d></d>
<d></d>
<d></d>
<d></d>
<d></d>
<d>0.69832072</d>
<d></d>
<d></d>
<d></d>
<d></d>
<d></d>
<d>0.5056792</d>
<d></d>
<d></d>
<d></d>
<d></d>
<d></d>
<d></d>
<d>0.5533089</d>
<d></d>
<d></d>
<d></d>
<d></d>
<d></d>
<d></d>
<d></d>
<d>0.74683867</d>
<d></d>
<d></d>
<d></d>
<d></d>
<d></d>
<d>0.50340262</d>
<d></d>
<d></d>
<d></d>
<d></d>
<d></d>
<d></d>
<d>0.42034439</d>
<d></d>
<d></d>
<d></d>
<d></d>
<d></d>
<d>0.49974122</d>
<d></d>
<d></d>
<d></d>
<d></d>
<d></d>
<d></d>
<d></d>
<d>0.58213152</d>
<d></d>
<d></d>
<d></d>
<d></d>
<d></d>
<d></d>
<d></d>
<d>0.4605219</d>
<d></d>
<d></d>
<d></d>
<d></d>
<d></d>
<d>0.44252612</d>
<d></d>
<d></d>
<d></d>
<d></d>
<d></d>
<d>0.40777952</d>
<d></d>
<d></d>
<d></d>
<d></d>
<d></d>
<d></d>
<d>0.39578816</d>
<d></d>
<d></d>
<d></d>
<d></d>
<d></d>
<d></d>
<d></d>
<d>0.64399068</d>
<d></d>
<d></d>
<d></d>
<d></d>
<d></d>
<d>0.41447286</d>
<d></d>
<d></d>
<d></d>
<d></d>
<d></d>
<d></d>
<d>0.48958581</d>
<d></d>
<d></d>
<d></d>
<d></d>
<d></d>
<d></d>
<d></d>
<d>0.52188099</d>
<d></d>
<d></d>
<d></d>
<d></d>
<d></d>
<d>0.65946509</d>
<d></d>
<d></d>
<d></d>
<d></d>
<d></d>
<d></d>
<d></d>
<d>0.79048525</d>
<d></d>
<d></d>
<d></d>
<d></d>
<d></d>
<d></d>
<d>0.95351033</d>
<d></d>
<d></d>
<d></d>
<d></d>
<d></d>
<d>0.73373176</d>
<d></d>
<d></d>
<d></d>
<d></d>
<d></d>
<d></d>
<d>0.79110772</d>
<d></d>
<d></d>
<d></d>
<d></d>
<d></d>
<d></d>
<d>0.59107695</d>
<d></d>
<d></d>
<d></d>
<d></d>
<d></d>
<d></d>
<d></d>
<d>0.7716292</d>
<d></d>
<d></d>
<d></d>
<d></d>
<d></d>
<d>0.86656688</d>
<d></d>
<d></d>
<d></d>
<d></d>
<d></d>
<d></d>
<d>0.73394858</d>
<d></d>
<d></d>
<d></d>
<d></d>
<d></d>
<d>0.67511086</d>
<d></d>
<d></d>
<d></d>
<d></d>
<d></d>
<d></d>
<d>0.75365091</d>
<d></d>
<d></d>
<d></d>
<d></d>
<d></d>
<d></d>
<d></d>
<d>0.64414805</d>
<d></d>
<d></d>
<d></d>
<d></d>
<d></d>
<d>0.5631181</d>
<d></d>
<d></d>
<d></d>
<d></d>
<d></d>
<d></d>
<d></d>
<d>0.44878583</d>
<d></d>
<d></d>
<d></d>
<d></d>
<d></d>
<d>0.50127642</d>
<d></d>
<d></d>
<d></d>
<d></d>
<d></d>
<d>0.50782288</d>
<d></d>
<d></d>
<d></d>
<d></d>
<d></d>
<d></d>
<d>0.46021066</d>
<d></d>
<d></d>
<d></d>
<d></d>
<d></d>
<d></d>
<d></d>
<d>0.41661305</d>
<d></d>
<d></d>
<d></d>
<d></d>
<d></d>
<d>0.46022815</d>
<d></d>
<d></d>
<d></d>
<d></d>
<d></d>
<d></d>
<d></d>
<d>0.50225209</d>
<d></d>
<d></d>
<d></d>
<d></d>
<d></d>
<d></d>
<d>0.41223475</d>
<d></d>
<d></d>
<d></d>
<d></d>
<d></d>
<d></d>
<d>0.55008813</d>
<d></d>
<d></d>
<d></d>
<d></d>
<d></d>
<d></d>
<d>0.74836688</d>
<d></d>
<d></d>
<d></d>
<d></d>
<d></d>
<d>0.64565877</d>
<d></d>
<d></d>
<d></d>
<d></d>
<d></d>
<d>0.64640714</d>
<d></d>
<d></d>
<d></d>
<d></d>
<d></d>
<d></d>
<d></d>
<d>0.64415504</d>
<d></d>
<d></d>
<d></d>
<d></d>
<d></d>
<d></d>
<d>0.51291807</d>
<d></d>
<d></d>
<d></d>
<d></d>
<d></d>
<d>0.50502525</d>
<d></d>
<d></d>
<d></d>
<d></d>
<d></d>
<d></d>
<d>0.54009708</d>
<d></d>
<d></d>
<d></d>
<d></d>
<d></d>
<d></d>
<d></d>
<d>0.45812992</d>
<d></d>
<d></d>
<d></d>
<d></d>
<d></d>
<d></d>
<d>0.5135895</d>
<d></d>
<d></d>
<d></d>
<d></d>
<d></d>
<d></d>
<d>0.580974</d>
<d></d>
<d></d>
<d></d>
<d></d>
<d></d>
<d></d>
<d>0.61003791</d>
<d></d>
<d></d>
<d></d>
<d></d>
<d></d>
<d></d>
<d>0.55110926</d>
<d></d>
<d></d>
<d></d>
<d></d>
<d></d>
<d></d>
<d>0.65324735</d>
<d></d>
<d></d>
<d></d>
<d></d>
<d></d>
<d></d>
<d>0.5386563</d>
<d></d>
<d></d>
<d></d>
<d></d>
<d></d>
<d></d>
<d>0.47416386</d>
<d></d>
<d></d>
<d></d>
<d></d>
<d></d>
<d>0.63078935</d>
<d></d>
<d></d>
<d></d>
<d></d>
<d></d>
<d></d>
<d>0.82202157</d>
<d></d>
<d></d>
<d></d>
<d></d>
<d></d>
<d>0.60537635</d>
<d></d>
<d></d>
<d></d>
<d></d>
<d></d>
<d></d>
<d></d>
<d>0.61594441</d>
<d></d>
<d></d>
<d></d>
<d></d>
<d></d>
<d></d>
<d>0.51440082</d>
<d></d>
<d></d>
<d></d>
<d></d>
<d></d>
<d>0.34481529</d>
<d></d>
<d></d>
<d></d>
<d></d>
<d></d>
<d></d>
<d></d>
<d>0.57701185</d>
<d></d>
<d></d>
<d></d>
<d></d>
<d></d>
<d>0.41940368</d>
<d></d>
<d></d>
<d></d>
<d></d>
<d></d>
<d></d>
<d>0.47006183</d>
<d></d>
<d></d>
<d></d>
<d></d>
<d></d>
<d>0.67749234</d>
<d></d>
<d></d>
<d></d>
<d></d>
<d></d>
<d></d>
<d></d>
<d></d>
<d>0.55021052</d>
<d></d>
<d></d>
<d></d>
<d></d>
<d></d>
<d>0.46065828</d>
<d></d>
<d></d>
<d></d>
<d></d>
<d></d>
<d></d>
<d>0.52020591</d>
<d></d>
<d></d>
<d></d>
<d></d>
<d></d>
<d></d>
<d>0.81920645</d>
<d></d>
<d></d>
<d></d>
<d></d>
<d></d>
<d></d>
<d>0.66399726</d>
<d></d>
<d></d>
<d></d>
<d></d>
<d></d>
<d></d>
<d>0.61268167</d>
<d></d>
<d></d>
<d></d>
<d></d>
<d></d>
<d>0.58953126</d>
<d></d>
<d></d>
<d></d>
<d></d>
<d></d>
<d></d>
<d>0.55729903</d>
<d></d>
<d></d>
<d></d>
<d></d>
<d></d>
<d></d>
<d>0.53256095</d>
<d></d>
<d></d>
<d></d>
<d></d>
<d></d>
<d></d>
<d>0.71871547</d>
<d></d>
<d></d>
<d></d>
<d></d>
<d></d>
<d>0.62032271</d>
<d></d>
<d></d>
<d></d>
<d></d>
<d></d>
<d></d>
<d>0.64112311</d>
<d></d>
<d></d>
<d></d>
<d></d>
<d></d>
<d></d>
<d></d>
<d></d>
<d>0.7444397</d>
<d></d>
<d></d>
<d></d>
<d></d>
<d></d>
<d>0.63988166</d>
<d></d>
<d></d>
<d></d>
<d></d>
<d></d>
<d></d>
<d></d>
<d>0.64275623</d>
<d></d>
<d></d>
<d></d>
<d></d>
<d></d>
<d></d>
<d>0.71583041</d>
<d></d>
<d></d>
<d></d>
<d></d>
<d></d>
<d>0.67522976</d>
<d></d>
<d></d>
<d></d>
<d></d>
<d></d>
<d></d>
<d></d>
<d>0.55206745</d>
<d></d>
<d></d>
<d></d>
<d></d>
<d></d>
<d>0.66493796</d>
<d></d>
<d></d>
<d></d>
<d></d>
<d></d>
<d></d>
<d>0.67015555</d>
<d></d>
<d></d>
<d></d>
<d></d>
<d></d>
<d>0.54281778</d>
<d></d>
<d></d>
<d></d>
<d></d>
<d></d>
<d></d>
<d>0.57377359</d>
<d></d>
<d></d>
<d></d>
<d></d>
<d></d>
<d></d>
<d>0.60735568</d>
<d></d>
<d></d>
<d></d>
<d></d>
<d></d>
<d></d>
<d>0.68961658</d>
<d></d>
<d></d>
<d></d>
<d></d>
<d></d>
<d></d>
<d>0.59332205</d>
<d></d>
<d></d>
<d></d>
<d></d>
<d></d>
<d>0.58648533</d>
<d></d>
<d></d>
<d></d>
<d></d>
<d></d>
<d></d>
<d></d>
<d>0.66055267</d>
<d></d>
<d></d>
<d></d>
<d></d>
<d></d>
<d></d>
<d>0.57149352</d>
<d></d>
<d></d>
<d></d>
<d></d>
<d></d>
<d></d>
<d>0.7043741</d>
<d></d>
<d></d>
<d></d>
<d></d>
<d></d>
<d>0.45539174</d>
<d></d>
<d></d>
<d></d>
<d></d>
<d></d>
<d></d>
<d></d>
<d>0.5122956</d>
<d></d>
<d></d>
<d></d>
<d></d>
<d></d>
<d>0.47274756</d>
<d></d>
<d></d>
<d></d>
<d></d>
<d></d>
<d></d>
<d></d>
<d>0.46160948</d>
<d></d>
<d></d>
<d></d>
<d></d>
<d></d>
<d>0.87407154</d>
<d></d>
<d></d>
<d></d>
<d></d>
<d></d>
<d></d>
<d>0.60274308</d>
<d></d>
<d></d>
<d></d>
<d></d>
<d></d>
<d></d>
<d>0.69738701</d>
<d></d>
<d></d>
<d></d>
<d></d>
<d></d>
<d>0.66940368</d>
<d></d>
<d></d>
<d></d>
<d></d>
<d></d>
<d></d>
<d>0.46103946</d>
<d></d>
<d></d>
<d></d>
<d></d>
<d></d>
<d></d>
<d>0.5167858</d>
<d></d>
<d></d>
<d></d>
<d></d>
<d></d>
<d></d>
<d>0.68068864</d>
<d></d>
<d></d>
<d></d>
<d></d>
<d></d>
<d>0.43017108</d>
<d></d>
<d></d>
<d></d>
<d></d>
<d></d>
<d></d>
<d></d>
<d></d>
<d></d>
<d>0.41964498</d>
</Subcolumn>
</YColumn>
<YColumn Width="81" Decimals="8" Subcolumns="1">
<Title></Title>
<Subcolumn>
<d></d>
<d></d>
<d></d>
<d></d>
<d></d>
<d>0.57971014</d>
<d></d>
<d></d>
<d></d>
<d></d>
<d>0.71071739</d>
<d></d>
<d></d>
<d></d>
<d></d>
<d></d>
<d>0.71045652</d>
<d></d>
<d></d>
<d></d>
<d></d>
<d></d>
<d>0.76569565</d>
<d></d>
<d></d>
<d></d>
<d></d>
<d></d>
<d></d>
<d>0.81816304</d>
<d></d>
<d></d>
<d></d>
<d></d>
<d></d>
<d></d>
<d>0.74344565</d>
<d></d>
<d></d>
<d></d>
<d></d>
<d></d>
<d>0.6554529</d>
<d></d>
<d></d>
<d></d>
<d></d>
<d></d>
<d></d>
<d></d>
<d>0.52810145</d>
<d></d>
<d></d>
<d></d>
<d></d>
<d></d>
<d>0.69781522</d>
<d></d>
<d></d>
<d></d>
<d></d>
<d></d>
<d></d>
<d>0.65824275</d>
<d></d>
<d></d>
<d></d>
<d></d>
<d></d>
<d>0.67282246</d>
<d></d>
<d></d>
<d></d>
<d></d>
<d></d>
<d></d>
<d>0.50263768</d>
<d></d>
<d></d>
<d></d>
<d></d>
<d></d>
<d>0.4807029</d>
<d></d>
<d></d>
<d></d>
<d></d>
<d></d>
<d></d>
<d>0.53775725</d>
<d></d>
<d></d>
<d></d>
<d></d>
<d></d>
<d></d>
<d></d>
<d>0.72191304</d>
<d></d>
<d></d>
<d></d>
<d></d>
<d></d>
<d>0.43429348</d>
<d></d>
<d></d>
<d></d>
<d></d>
<d></d>
<d>0.60443478</d>
<d></d>
<d></d>
<d></d>
<d></d>
<d></d>
<d>0.55255435</d>
<d></d>
<d></d>
<d></d>
<d></d>
<d></d>
<d></d>
<d></d>
<d>0.40544928</d>
<d></d>
<d></d>
<d></d>
<d></d>
<d></d>
<d></d>
<d>0.30600725</d>
<d></d>
<d></d>
<d></d>
<d></d>
<d></d>
<d>0.30811594</d>
<d></d>
<d></d>
<d></d>
<d></d>
<d></d>
<d></d>
<d>0.48307971</d>
<d></d>
<d></d>
<d></d>
<d></d>
<d></d>
<d>0.44992391</d>
<d></d>
<d></d>
<d></d>
<d></d>
<d></d>
<d></d>
<d>0.54358333</d>
<d></d>
<d></d>
<d></d>
<d></d>
<d></d>
<d></d>
<d>0.61349275</d>
<d></d>
<d></d>
<d></d>
<d></d>
<d></d>
<d></d>
<d>0.47034058</d>
<d></d>
<d></d>
<d></d>
<d></d>
<d></d>
<d>0.49495652</d>
<d></d>
<d></d>
<d></d>
<d></d>
<d></d>
<d></d>
<d></d>
<d>0.34832971</d>
<d></d>
<d></d>
<d></d>
<d></d>
<d></d>
<d></d>
<d>0.30769565</d>
<d></d>
<d></d>
<d></d>
<d></d>
<d></d>
<d>0.46878623</d>
<d></d>
<d></d>
<d></d>
<d></d>
<d></d>
<d>0.71996377</d>
<d></d>
<d></d>
<d></d>
<d></d>
<d></d>
<d></d>
<d></d>
<d></d>
<d>0.67632971</d>
<d></d>
<d></d>
<d></d>
<d></d>
<d>0.3986087</d>
<d></d>
<d></d>
<d></d>
<d></d>
<d></d>
<d>0.37513768</d>
<d></d>
<d></d>
<d></d>
<d></d>
<d></d>
<d>0.40922101</d>
<d></d>
<d></d>
<d></d>
<d></d>
<d></d>
<d></d>
<d>0.38613043</d>
<d></d>
<d></d>
<d></d>
<d></d>
<d></d>
<d></d>
<d>0.34784058</d>
<d></d>
<d></d>
<d></d>
<d></d>
<d></d>
<d></d>
<d>0.38650725</d>
<d></d>
<d></d>
<d></d>
<d></d>
<d></d>
<d></d>
<d>0.43430435</d>
<d></d>
<d></d>
<d></d>
<d></d>
<d></d>
<d>0.53277174</d>
<d></d>
<d></d>
<d></d>
<d></d>
<d></d>
<d></d>
<d>0.64330435</d>
<d></d>
<d></d>
<d></d>
<d></d>
<d></d>
<d>0.68181884</d>
<d></d>
<d></d>
<d></d>
<d></d>
<d></d>
<d></d>
<d></d>
<d>0.82402174</d>
<d></d>
<d></d>
<d></d>
<d></d>
<d></d>
<d>0.64114493</d>
<d></d>
<d></d>
<d></d>
<d></d>
<d></d>
<d>0.58161232</d>
<d></d>
<d></d>
<d></d>
<d></d>
<d></d>
<d></d>
<d></d>
<d>0.59339493</d>
<d></d>
<d></d>
<d></d>
<d></d>
<d></d>
<d>0.54624638</d>
<d></d>
<d></d>
<d></d>
<d></d>
<d></d>
<d>0.56681159</d>
<d></d>
<d></d>
<d></d>
<d></d>
<d></d>
<d></d>
<d>0.55984058</d>
<d></d>
<d></d>
<d></d>
<d></d>
<d></d>
<d></d>
<d></d>
<d>0.43317391</d>
<d></d>
<d></d>
<d></d>
<d></d>
<d></d>
<d>0.5433442</d>
<d></d>
<d></d>
<d></d>
<d></d>
<d></d>
<d>0.45288043</d>
<d></d>
<d></d>
<d></d>
<d></d>
<d></d>
<d></d>
<d>0.50801449</d>
<d></d>
<d></d>
<d></d>
<d></d>
<d></d>
<d>0.63111232</d>
<d></d>
<d></d>
<d></d>
<d></d>
<d></d>
<d></d>
<d></d>
<d></d>
<d>0.51067754</d>
<d></d>
<d></d>
<d></d>
<d></d>
<d></d>
<d>0.39375</d>
<d></d>
<d></d>
<d></d>
<d></d>
<d></d>
<d></d>
<d>0.5037029</d>
<d></d>
<d></d>
<d></d>
<d></d>
<d></d>
<d>0.70631522</d>
<d></d>
<d></d>
<d></d>
<d></d>
<d></d>
<d></d>
<d>0.62710145</d>
<d></d>
<d></d>
<d></d>
<d></d>
<d></d>
<d></d>
<d>0.47546014</d>
<d></d>
<d></d>
<d></d>
<d></d>
<d></d>
<d></d>
<d>0.42121014</d>
<d></d>
<d></d>
<d></d>
<d></d>
<d></d>
<d>0.47496377</d>
<d></d>
<d></d>
<d></d>
<d></d>
<d></d>
<d></d>
<d></d>
<d>0.50322101</d>
<d></d>
<d></d>
<d></d>
<d></d>
<d>0.66484058</d>
<d></d>
<d></d>
<d></d>
<d></d>
<d></d>
<d>0.62163043</d>
<d></d>
<d></d>
<d></d>
<d></d>
<d></d>
<d>0.54270652</d>
<d></d>
<d></d>
<d></d>
<d></d>
<d></d>
<d></d>
<d>0.33132609</d>
<d></d>
<d></d>
<d></d>
<d></d>
<d></d>
<d></d>
<d></d>
<d>0.2940471</d>
<d></d>
<d></d>
<d></d>
<d></d>
<d></d>
<d>0.47509058</d>
<d></d>
<d></d>
<d></d>
<d></d>
<d></d>
<d></d>
<d>0.42124638</d>
<d></d>
<d></d>
<d></d>
<d></d>
<d></d>
<d>0.56945652</d>
<d></d>
<d></d>
<d></d>
<d></d>
<d></d>
<d></d>
<d>0.81989855</d>
<d></d>
<d></d>
<d></d>
<d></d>
<d></d>
<d>0.70631522</d>
<d></d>
<d></d>
<d></d>
<d></d>
<d></d>
<d></d>
<d></d>
<d>0.59920652</d>
<d></d>
<d></d>
<d></d>
<d></d>
<d></d>
<d>0.56911594</d>
<d></d>
<d></d>
<d></d>
<d></d>
<d></d>
<d>0.56907971</d>
<d></d>
<d></d>
<d></d>
<d></d>
<d></d>
<d></d>
<d></d>
<d>0.57573551</d>
<d></d>
<d></d>
<d></d>
<d></d>
<d></d>
<d>0.53175</d>
<d></d>
<d></d>
<d></d>
<d></d>
<d></d>
<d>0.66423913</d>
<d></d>
<d></d>
<d></d>
<d></d>
<d></d>
<d></d>
<d>0.63530797</d>
<d></d>
<d></d>
<d></d>
<d></d>
<d></d>
<d></d>
<d></d>
<d></d>
<d>0.71450725</d>
<d></d>
<d></d>
<d></d>
<d></d>
<d></d>
<d>0.6626558</d>
<d></d>
<d></d>
<d></d>
<d></d>
<d></d>
<d>0.62069928</d>
<d></d>
<d></d>
<d></d>
<d></d>
<d></d>
<d></d>
<d>0.63225725</d>
<d></d>
<d></d>
<d></d>
<d></d>
<d></d>
<d></d>
<d>0.45276812</d>
<d></d>
<d></d>
<d></d>
<d></d>
<d></d>
<d></d>
<d>0.46125362</d>
<d></d>
<d></d>
<d></d>
<d></d>
<d></d>
<d>0.66158333</d>
<d></d>
<d></d>
<d></d>
<d></d>
<d></d>
<d></d>
<d>0.4623442</d>
<d></d>
<d></d>
<d></d>
<d></d>
<d></d>
<d>0.50111594</d>
<d></d>
<d></d>
<d></d>
<d></d>
<d></d>
<d></d>
<d>0.6508442</d>
<d></d>
<d></d>
<d></d>
<d></d>
<d></d>
<d></d>
<d>0.5300942</d>
<d></d>
<d></d>
<d></d>
<d></d>
<d></d>
<d></d>
<d>0.4051558</d>
<d></d>
<d></d>
<d></d>
<d></d>
<d></d>
<d>0.58683333</d>
<d></d>
<d></d>
<d></d>
<d></d>
<d></d>
<d></d>
<d>0.54347826</d>
<d></d>
<d></d>
<d></d>
<d></d>
<d></d>
<d>0.43851812</d>
<d></d>
<d></d>
<d></d>
<d></d>
<d></d>
<d>0.76059058</d>
<d></d>
<d></d>
<d></d>
<d></d>
<d></d>
<d></d>
<d>0.50977174</d>
<d></d>
<d></d>
<d></d>
<d></d>
<d></d>
<d></d>
<d>0.6111087</d>
<d></d>
<d></d>
<d></d>
<d></d>
<d></d>
<d></d>
<d>0.79827174</d>
<d></d>
<d></d>
<d></d>
<d></d>
<d></d>
<d>0.56002899</d>
<d></d>
<d></d>
<d></d>
<d></d>
<d></d>
<d></d>
<d>0.65631159</d>
<d></d>
<d></d>
<d></d>
<d></d>
<d></d>
<d>0.75295652</d>
<d></d>
<d></d>
<d></d>
<d></d>
<d></d>
<d></d>
<d></d>
<d>0.93052899</d>
<d></d>
<d></d>
<d></d>
<d></d>
<d></d>
<d>0.6518442</d>
<d></d>
<d></d>
<d></d>
<d></d>
<d></d>
<d></d>
<d>0.4532971</d>
<d></d>
<d></d>
<d></d>
<d></d>
<d></d>
<d>0.36612681</d>
<d></d>
<d></d>
<d></d>
<d></d>
<d></d>
<d>0.50003986</d>
<d></d>
<d></d>
<d></d>
<d></d>
<d></d>
<d></d>
<d></d>
<d></d>
<d>0.65782246</d>
<d></d>
<d></d>
<d></d>
<d></d>
<d></d>
<d>0.68806522</d>
<d></d>
<d></d>
<d></d>
<d></d>
<d></d>
<d></d>
<d>0.66576812</d>
<d></d>
<d></d>
<d></d>
<d></d>
<d></d>
<d>0.79036232</d>
<d></d>
<d></d>
<d></d>
<d></d>
<d></d>
<d></d>
<d></d>
<d>0.73877536</d>
<d></d>
<d></d>
<d></d>
<d></d>
<d></d>
<d>0.54959058</d>
<d></d>
<d></d>
<d></d>
<d></d>
<d></d>
<d>0.58641667</d>
<d></d>
<d></d>
<d></d>
<d></d>
<d></d>
<d></d>
<d></d>
<d>0.67098913</d>
<d></d>
<d></d>
<d></d>
<d></d>
<d></d>
<d>0.41128623</d>
<d></d>
<d></d>
<d></d>
<d></d>
<d></d>
<d></d>
<d>0.44132246</d>
<d></d>
<d></d>
<d></d>
<d></d>
<d></d>
<d>0.40654348</d>
<d></d>
<d></d>
<d></d>
<d></d>
<d></d>
<d></d>
<d>0.47686232</d>
<d></d>
<d></d>
<d></d>
<d></d>
<d></d>
<d>0.52661594</d>
<d></d>
<d></d>
<d></d>
<d></d>
<d></d>
<d></d>
<d></d>
<d>0.63792391</d>
<d></d>
<d></d>
<d></d>
<d></d>
<d></d>
<d></d>
<d>0.46220652</d>
<d></d>
<d></d>
<d></d>
<d></d>
<d></d>
<d>0.43082246</d>
<d></d>
<d></d>
<d></d>
<d></d>
<d></d>
<d>0.56941667</d>
<d></d>
<d></d>
<d></d>
<d></d>
<d></d>
<d></d>
<d>0.53542754</d>
<d></d>
<d></d>
<d></d>
<d></d>
<d></d>
<d>0.54569565</d>
<d></d>
<d></d>
<d></d>
<d></d>
<d></d>
<d></d>
<d>0.62167391</d>
<d></d>
<d></d>
<d></d>
<d></d>
<d></d>
<d>0.59888043</d>
<d></d>
<d></d>
<d></d>
<d></d>
<d></d>
<d></d>
<d>0.35228261</d>
<d></d>
<d></d>
<d></d>
<d></d>
<d></d>
<d></d>
<d>0.26338768</d>
<d></d>
<d></d>
<d></d>
<d></d>
<d></d>
<d>0.59415942</d>
<d></d>
<d></d>
<d></d>
<d></d>
<d></d>
<d></d>
<d>0.63574275</d>
<d></d>
<d></d>
<d></d>
<d></d>
<d></d>
<d>0.5447971</d>
<d></d>
<d></d>
<d></d>
<d></d>
<d></d>
<d></d>
<d></d>
<d></d>
<d>0.48369565</d>
<d></d>
<d></d>
<d></d>
<d></d>
<d></d>
<d>0.59836594</d>
<d></d>
<d></d>
<d></d>
<d></d>
<d></d>
<d></d>
<d>0.59909058</d>
<d></d>
<d></d>
<d></d>
<d></d>
<d></d>
<d>0.75244928</d>
<d></d>
<d></d>
<d></d>
<d></d>
<d></d>
<d>0.66473551</d>
<d></d>
<d></d>
<d></d>
<d></d>
<d></d>
<d></d>
<d></d>
<d>0.63064493</d>
<d></d>
<d></d>
<d></d>
<d></d>
<d></d>
<d></d>
<d>0.53277899</d>
<d></d>
<d></d>
<d></d>
<d></d>
<d></d>
<d>0.63371377</d>
<d></d>
<d></d>
<d></d>
<d></d>
<d></d>
<d>0.9142029</d>
<d></d>
<d></d>
<d></d>
<d></d>
<d></d>
<d></d>
<d></d>
<d>0.82181159</d>
<d></d>
<d></d>
<d></d>
<d></d>
<d></d>
<d>0.63380435</d>
<d></d>
<d></d>
<d></d>
<d></d>
<d></d>
<d></d>
<d>0.55840942</d>
<d></d>
<d></d>
<d></d>
<d></d>
<d></d>
<d></d>
<d>0.65294928</d>
<d></d>
<d></d>
<d></d>
<d></d>
<d></d>
<d>0.77731159</d>
<d></d>
<d></d>
<d></d>
<d></d>
<d></d>
<d></d>
<d>0.87292029</d>
<d></d>
<d></d>
<d></d>
<d></d>
<d></d>
<d>0.70407609</d>
<d></d>
<d></d>
<d></d>
<d></d>
<d></d>
<d></d>
<d>0.4896087</d>
<d></d>
<d></d>
<d></d>
<d></d>
<d></d>
<d>0.55052899</d>
<d></d>
<d></d>
<d></d>
<d></d>
<d></d>
<d></d>
<d></d>
<d>0.72512319</d>
<d></d>
<d></d>
<d></d>
<d></d>
<d></d>
<d></d>
<d>0.48807609</d>
<d></d>
<d></d>
<d></d>
<d></d>
<d></d>
<d>0.47376812</d>
<d></d>
<d></d>
<d></d>
<d></d>
<d></d>
<d>0.50068116</d>
<d></d>
<d></d>
<d></d>
<d></d>
<d></d>
<d></d>
<d>0.64009783</d>
<d></d>
<d></d>
<d></d>
<d></d>
<d></d>
<d></d>
<d>0.58939855</d>
<d></d>
<d></d>
<d></d>
<d></d>
<d></d>
<d>0.63782246</d>
<d></d>
<d></d>
<d></d>
<d></d>
<d></d>
<d>0.63955797</d>
<d></d>
<d></d>
<d></d>
<d></d>
<d></d>
<d></d>
<d>0.6444058</d>
<d></d>
<d></d>
<d></d>
<d></d>
<d></d>
<d></d>
<d></d>
<d>0.65501087</d>
<d></d>
<d></d>
<d></d>
<d></d>
<d></d>
<d>0.89811594</d>
<d></d>
<d></d>
<d></d>
<d></d>
<d></d>
<d></d>
<d></d>
<d>0.77809783</d>
<d></d>
<d></d>
<d></d>
<d></d>
<d></d>
<d>0.5716558</d>
<d></d>
<d></d>
<d></d>
<d></d>
<d></d>
<d></d>
<d>1</d>
<d></d>
<d></d>
<d></d>
<d></d>
<d></d>
<d>0.90500362</d>
<d></d>
<d></d>
<d></d>
<d></d>
<d></d>
<d></d>
<d>0.51531159</d>
<d></d>
<d></d>
<d></d>
<d></d>
<d></d>
<d>0.6439058</d>
<d></d>
<d></d>
<d></d>
<d></d>
<d></d>
<d>0.67792391</d>
<d></d>
<d></d>
<d></d>
<d></d>
<d></d>
<d></d>
<d></d>
<d></d>
<d>0.69538043</d>
<d></d>
<d></d>
<d></d>
<d></d>
<d></d>
<d>0.7671558</d>
<d></d>
<d></d>
<d></d>
<d></d>
<d></d>
<d>0.5466087</d>
<d></d>
<d></d>
<d></d>
<d></d>
<d></d>
<d>0.53346377</d>
<d></d>
<d></d>
<d></d>
<d></d>
<d></d>
<d></d>
<d></d>
<d>0.66561232</d>
<d></d>
<d></d>
<d></d>
<d></d>
<d></d>
<d></d>
<d>0.72396014</d>
<d></d>
<d></d>
<d></d>
<d></d>
<d></d>
<d>0.79313768</d>
<d></d>
<d></d>
<d></d>
<d></d>
<d></d>
<d></d>
<d>0.7227029</d>
<d></d>
<d></d>
<d></d>
<d></d>
<d></d>
<d>0.75702536</d>
<d></d>
<d></d>
<d></d>
<d></d>
<d></d>
<d></d>
<d>0.71614493</d>
<d></d>
<d></d>
<d></d>
<d></d>
<d></d>
<d>0.72377174</d>
<d></d>
<d></d>
<d></d>
<d></d>
<d></d>
<d></d>
<d></d>
<d>0.66834783</d>
<d></d>
<d></d>
<d></d>
<d></d>
<d></d>
<d>0.50842754</d>
<d></d>
<d></d>
<d></d>
<d></d>
<d></d>
<d></d>
<d>0.58883333</d>
<d></d>
<d></d>
<d></d>
<d></d>
<d></d>
<d></d>
<d>0.71777536</d>
<d></d>
<d></d>
<d></d>
<d></d>
<d></d>
<d>0.78725362</d>
<d></d>
<d></d>
<d></d>
<d></d>
<d></d>
<d>0.57459058</d>
<d></d>
<d></d>
<d></d>
<d></d>
<d></d>
<d></d>
<d></d>
<d></d>
<d></d>
<d>0.57971014</d>
</Subcolumn>
</YColumn>
</Table>
<Table ID="Table2" XFormat="none" TableType="OneWay" EVFormat="AsteriskAfterNumber">
<Title>Copy of 8-cell</Title>
<RowTitlesColumn Width="32">
<Subcolumn></Subcolumn>
</RowTitlesColumn>
<YColumn Width="81" Decimals="8" Subcolumns="1">
<Title>Basal</Title>
<Subcolumn>
<d>0.69920078</d>
<d>0.43876673</d>
<d>0.43691233</d>
<d>0.49701016</d>
<d>0.36159928</d>
<d>0.3968846</d>
<d>0.39461068</d>
<d>0.33827334</d>
<d>0.35239415</d>
<d>0.47174773</d>
<d>0.49630792</d>
<d>0.31505987</d>
<d>0.28934752</d>
<d>0.37675978</d>
<d>0.29510225</d>
<d>0.33111717</d>
<d>0.4284368</d>
<d>0.34372102</d>
<d>0.26770574</d>
<d>0.29386801</d>
<d>0.27045694</d>
<d>0.36379113</d>
<d>0.48926423</d>
<d>0.58360391</d>
<d>0.65911695</d>
<d>0.52355638</d>
<d>0.59443772</d>
<d>0.6682424</d>
<d>0.66540396</d>
<d>0.4970077</d>
<d>0.62650411</d>
<d>0.8313703</d>
<d>0.63603807</d>
<d>0.45409159</d>
<d>0.48829609</d>
<d>0.50440886</d>
<d>0.80559623</d>
<d>0.82424503</d>
<d>0.60119692</d>
<d>0.29111224</d>
<d>0.45118419</d>
<d>0.4719764</d>
<d>0.54961694</d>
<d>0.78099141</d>
<d>0.86441245</d>
<d>0.73553771</d>
<d>0.72520631</d>
<d>0.35537341</d>
<d>0.52847458</d>
<d>0.47882212</d>
<d>0.76601125</d>
<d>0.76859596</d>
<d>0.73915259</d>
<d>0.51678574</d>
<d>0.49309195</d>
<d>0.52066094</d>
<d>0.46687667</d>
<d>0.38791472</d>
<d>0.38468662</d>
<d>0.45041262</d>
<d>0.69402244</d>
<d>0.67174559</d>
<d>0.62771255</d>
<d>0.42045602</d>
<d>0.50090558</d>
<d>0.30320318</d>
<d>0.39295025</d>
<d>0.74904964</d>
<d>0.43468474</d>
<d>0.58267074</d>
<d>0.55406828</d>
<d>0.6415011</d>
<d>1</d>
<d>0.72469055</d>
<d>0.80462538</d>
<d>0.54307223</d>
<d>0.3990562</d>
<d>0.55932286</d>
<d>0.50004682</d>
<d>0.6633696</d>
<d>0.66839947</d>
<d>0.61615326</d>
<d>0.62882718</d>
<d>0.53503492</d>
<d>0.57783937</d>
<d>0.6889871</d>
<d>0.45377053</d>
<d>0.41370386</d>
<d>0.3551956</d>
<d>0.55952664</d>
<d>0.58249521</d>
<d>0.34020619</d>
<d>0.64811719</d>
<d>0.65290115</d>
<d>0.54247157</d>
<d>0.78411364</d>
<d>0.59289191</d>
<d>0.8074459</d>
<d>0.73997398</d>
<d>0.50901537</d>
<d>0.42254752</d>
<d>0.43487809</d>
<d>0.54060065</d>
<d>0.7877051</d>
<d>0.61392662</d>
<d>0.53462421</d>
<d>0.54080698</d>
<d>0.65044972</d>
<d>0.57971014</d>
<d>0.71071739</d>
<d>0.71045652</d>
<d>0.76569565</d>
<d>0.81816304</d>
<d>0.74344565</d>
<d>0.6554529</d>
<d>0.52810145</d>
<d>0.69781522</d>
<d>0.65824275</d>
<d>0.67282246</d>
<d>0.50263768</d>
<d>0.4807029</d>
<d>0.53775725</d>
<d>0.72191304</d>
<d>0.43429348</d>
<d>0.60443478</d>
<d>0.55255435</d>
<d>0.40544928</d>
</Subcolumn>
</YColumn>
<YColumn Width="81" Decimals="8" Subcolumns="1">
<Title>Apical</Title>
<Subcolumn>
<d>0.51172073</d>
<d>0.52412699</d>
<d>0.50433656</d>
<d>0.46613284</d>
<d>0.60791556</d>
<d>0.63391063</d>
<d>0.81330731</d>
<d>0.26880014</d>
<d>0.61973509</d>
<d>0.52502379</d>
<d>0.59772851</d>
<d>0.74851876</d>
<d>0.57675857</d>
<d>0.60033683</d>
<d>0.65819114</d>
<d>0.57044144</d>
<d>0.58408497</d>
<d>0.75851429</d>
<d>0.67346107</d>
<d>0.65835834</d>
<d>0.61052692</d>
<d>0.82989661</d>
<d>0.42560048</d>
<d>0.72053331</d>
<d>0.73149445</d>
<d>0.55808451</d>
<d>0.82617623</d>
<d>0.52887778</d>
<d>0.49423824</d>
<d>0.70758261</d>
<d>0.60933554</d>
<d>0.57966724</d>
<d>0.76656374</d>
<d>0.52354046</d>
<d>0.72396596</d>
<d>0.53588634</d>
<d>0.67825916</d>
<d>0.53819953</d>
<d>0.55834447</d>
<d>0.60415208</d>
<d>0.30983001</d>
<d>0.40564716</d>
<d>0.84887842</d>
<d>0.78099141</d>
<d>0.76781869</d>
<d>0.692665</d>
<d>0.89314178</d>
<d>0.63739684</d>
<d>0.8556951</d>
<d>0.79028893</d>
<d>0.67038815</d>
<d>0.51239731</d>
<d>0.72055755</d>
<d>0.64178527</d>
<d>0.5014188</d>
<d>0.58574356</d>
<d>0.64669436</d>
<d>0.70403029</d>
<d>0.78041125</d>
<d>0.66115758</d>
<d>0.62467784</d>
<d>0.52298532</d>
<d>0.46397212</d>
<d>0.55888489</d>
<d>0.43175437</d>
<d>0.35821101</d>
<d>0.39675851</d>
<d>0.40909074</d>
<d>0.56057752</d>
<d>0.48084118</d>
<d>0.38741971</d>
<d>0.37299676</d>
<d>0.3084961</d>
<d>0.6087077</d>
<d>0.49733526</d>
<d>0.40714593</d>
<d>0.5479785</d>
<d>0.59657684</d>
<d>0.27619707</d>
<d>0.26860171</d>
<d>0.45223872</d>
<d>0.48720436</d>
<d>0.4470141</d>
<d>0.33004625</d>
<d>0.19988764</d>
<d>0.35664875</d>
<d>0.27738057</d>
<d>0.1956218</d>
<d>0.19724724</d>
<d>0.07490496</d>
<d>0.68961658</d>
<d>0.59332205</d>
<d>0.58648533</d>
<d>0.66055267</d>
<d>0.57149352</d>
<d>0.7043741</d>
<d>0.45539174</d>
<d>0.5122956</d>
<d>0.47274756</d>
<d>0.46160948</d>
<d>0.87407154</d>
<d>0.60274308</d>
<d>0.69738701</d>
<d>0.66940368</d>
<d>0.46103946</d>
<d>0.5167858</d>
<d>0.68068864</d>
<d>0.43017108</d>
<d>0.41964498</d>
<d>0.67792391</d>
<d>0.69538043</d>
<d>0.7671558</d>
<d>0.5466087</d>
<d>0.53346377</d>
<d>0.66561232</d>
<d>0.72396014</d>
<d>0.79313768</d>
<d>0.7227029</d>
<d>0.75702536</d>
<d>0.71614493</d>
<d>0.72377174</d>
<d>0.66834783</d>
<d>0.50842754</d>
<d>0.58883333</d>
<d>0.71777536</d>
<d>0.78725362</d>
<d>0.57459058</d>
<d>0.57971014</d>
</Subcolumn>
</YColumn>
</Table>
<Table ID="Table10" XFormat="numbers" YFormat="replicates" Replicates="1" TableType="XY" EVFormat="AsteriskAfterNumber">
<Title>5-6 hpf</Title>
<RowTitlesColumn Width="84">
<Subcolumn></Subcolumn>
</RowTitlesColumn>
<XColumn Width="77" Subcolumns="1" Decimals="8">
<Title></Title>
<Subcolumn>
<d>0</d>
<d>0.01492583</d>
<d>0.02985043</d>
<d>0.04477627</d>
<d>0.0597021</d>
<d>0.0746267</d>
<d>0.08955253</d>
<d>0.10447713</d>
<d>0.11940297</d>
<d>0.1343288</d>
<d>0.1492534</d>
<d>0.16417923</d>
<d>0.17910507</d>
<d>0.19402967</d>
<d>0.2089555</d>
<d>0.2238801</d>
<d>0.23880593</d>
<d>0.25373177</d>
<d>0.26865637</d>
<d>0.2835822</d>
<d>0.29850803</d>
<d>0.31343263</d>
<d>0.32835847</d>
<d>0.3432843</d>
<d>0.3582089</d>
<d>0.37313473</d>
<d>0.38805933</d>
<d>0.40298517</d>
<d>0.417911</d>
<d>0.4328356</d>
<d>0.44776143</d>
<d>0.46268726</d>
<d>0.47761187</d>
<d>0.4925377</d>
<d>0.5074623</d>
<d>0.52238813</d>
<d>0.53731397</d>
<d>0.55223857</d>
<d>0.5671644</d>
<d>0.58209023</d>
<d>0.59701483</d>
<d>0.61194067</d>
<d>0.6268665</d>
<d>0.6417911</d>
<d>0.65671693</d>
<d>0.67164153</d>
<d>0.68656737</d>
<d>0.7014932</d>
<d>0.7164178</d>
<d>0.73134363</d>
<d>0.74626946</d>
<d>0.76119407</d>
<d>0.7761199</d>
<d>0.7910445</d>
<d>0.80597033</d>
<d>0.82089617</d>
<d>0.83582077</d>
<d>0.8507466</d>
<d>0.86567243</d>
<d>0.88059703</d>
<d>0.89552287</d>
<d>0.9104487</d>
<d>0.9253733</d>
<d>0.94029913</d>
<d>0.95522373</d>
<d>0.97014957</d>
<d>0.9850754</d>
<d>1</d>
<d>0</d>
<d>0.01886851</d>
<d>0.03773547</d>
<d>0.05660398</d>
<d>0.07547249</d>
<d>0.09433945</d>
<d>0.11320796</d>
<d>0.13207491</d>
<d>0.15094343</d>
<d>0.16981194</d>
<d>0.18867889</d>
<d>0.2075474</d>
<d>0.22641592</d>
<d>0.24528287</d>
<d>0.26415138</d>
<d>0.28301834</d>
<d>0.30188685</d>
<d>0.32075536</d>
<d>0.33962232</d>
<d>0.35849083</d>
<d>0.37735934</d>
<d>0.3962263</d>
<d>0.41509481</d>
<d>0.43396332</d>
<d>0.45283028</d>
<d>0.47169879</d>
<d>0.49056574</d>
<d>0.50943426</d>
<d>0.52830277</d>
<d>0.54716972</d>
<d>0.56603823</d>
<d>0.58490675</d>
<d>0.6037737</d>
<d>0.62264221</d>
<d>0.64150917</d>
<d>0.66037768</d>
<d>0.67924619</d>
<d>0.69811315</d>
<d>0.71698166</d>
<d>0.73585017</d>
<d>0.75471713</d>
<d>0.77358564</d>
<d>0.79245415</d>
<d>0.81132111</d>
<d>0.83018962</d>
<d>0.84905657</d>
<d>0.86792509</d>
<d>0.8867936</d>
<d>0.90566055</d>
<d>0.92452906</d>
<d>0.94339758</d>
<d>0.96226453</d>
<d>0.98113304</d>
<d>1</d>
<d>0</d>
<d>0.01666722</d>
<d>0.03333311</d>
<d>0.05000033</d>
<d>0.06666623</d>
<d>0.08333344</d>
<d>0.09999934</d>
<d>0.11666656</d>
<d>0.13333377</d>
<d>0.14999967</d>
<d>0.16666689</d>
<d>0.18333278</d>
<d>0.2</d>
<d>0.21666722</d>
<d>0.23333311</d>
<d>0.25000033</d>
<d>0.26666623</d>
<d>0.28333344</d>
<d>0.29999934</d>
<d>0.31666656</d>
<d>0.33333377</d>
<d>0.34999967</d>
<d>0.36666689</d>
<d>0.38333278</d>
<d>0.4</d>
<d>0.41666589</d>
<d>0.43333311</d>
<d>0.45000033</d>
<d>0.46666623</d>
<d>0.48333344</d>
<d>0.49999934</d>
<d>0.51666656</d>
<d>0.53333377</d>
<d>0.54999967</d>
<d>0.56666689</d>
<d>0.58333278</d>
<d>0.6</d>
<d>0.61666589</d>
<d>0.63333311</d>
<d>0.65000033</d>
<d>0.66666623</d>
<d>0.68333344</d>
<d>0.69999934</d>
<d>0.71666656</d>
<d>0.73333245</d>
<d>0.74999967</d>
<d>0.76666689</d>
<d>0.78333278</d>
<d>0.8</d>
<d>0.81666589</d>
<d>0.83333311</d>
<d>0.85000033</d>
<d>0.86666623</d>
<d>0.88333344</d>
<d>0.89999934</d>
<d>0.91666656</d>
<d>0.93333245</d>
<d>0.94999967</d>
<d>0.96666689</d>
<d>0.98333278</d>
<d>1</d>
<d>0</d>
<d>0.02381033</d>
<d>0.04761878</d>
<d>0.07142911</d>
<d>0.09523755</d>
<d>0.11904789</d>
<d>0.14285633</d>
<d>0.16666667</d>
<d>0.190477</d>
<d>0.21428544</d>
<d>0.23809578</d>
<d>0.26190422</d>
<d>0.28571456</d>
<d>0.30952489</d>
<d>0.33333333</d>
<d>0.35714367</d>
<d>0.38095211</d>
<d>0.40476245</d>
<d>0.42857089</d>
<d>0.45238122</d>
<d>0.47619156</d>
<d>0.5</d>
<d>0.52381033</d>
<d>0.54761878</d>
<d>0.57142911</d>
<d>0.59523755</d>
<d>0.61904789</d>
<d>0.64285822</d>
<d>0.66666667</d>
<d>0.690477</d>
<d>0.71428544</d>
<d>0.73809578</d>
<d>0.76190611</d>
<d>0.78571456</d>
<d>0.80952489</d>
<d>0.83333333</d>
<d>0.85714367</d>
<d>0.88095211</d>
<d>0.90476245</d>
<d>0.92857278</d>
<d>0.95238122</d>
<d>0.97619156</d>
<d>1</d>
<d>0</d>
<d>0.02325581</d>
<d>0.04651163</d>
<d>0.06976744</d>
<d>0.09302326</d>
<d>0.11627907</d>
<d>0.13953488</d>
<d>0.1627907</d>
<d>0.18604651</d>
<d>0.20930233</d>
<d>0.23255814</d>
<d>0.25581395</d>
<d>0.27906977</d>
<d>0.30232558</d>
<d>0.3255814</d>
<d>0.34883721</d>
<d>0.37209302</d>
<d>0.39534884</d>
<d>0.41860465</d>
<d>0.44186047</d>
<d>0.46511628</d>
<d>0.48837209</d>
<d>0.51162791</d>
<d>0.53488372</d>
<d>0.55813953</d>
<d>0.58139535</d>
<d>0.60465116</d>
<d>0.62790698</d>
<d>0.65116279</d>
<d>0.6744186</d>
<d>0.69767442</d>
<d>0.72093023</d>
<d>0.74418605</d>
<d>0.76744186</d>
<d>0.79069767</d>
<d>0.81395349</d>
<d>0.8372093</d>
<d>0.86046512</d>
<d>0.88372093</d>
<d>0.90697674</d>
<d>0.93023256</d>
<d>0.95348837</d>
<d>0.97674419</d>
<d>1</d>
<d>0</d>
<d>0.02173913</d>
<d>0.04347826</d>
<d>0.06521739</d>
<d>0.08695652</d>
<d>0.10869565</d>
<d>0.13043478</d>
<d>0.15217391</d>
<d>0.17391304</d>
<d>0.19565217</d>
<d>0.2173913</d>
<d>0.23913043</d>
<d>0.26086957</d>
<d>0.2826087</d>
<d>0.30434783</d>
<d>0.32608696</d>
<d>0.34782609</d>
<d>0.36956522</d>
<d>0.39130435</d>
<d>0.41304348</d>
<d>0.43478261</d>
<d>0.45652174</d>
<d>0.47826087</d>
<d>0.5</d>
<d>0.52173913</d>
<d>0.54347826</d>
<d>0.56521739</d>
<d>0.58695652</d>
<d>0.60869565</d>
<d>0.63043478</d>
<d>0.65217391</d>
<d>0.67391304</d>
<d>0.69565217</d>
<d>0.7173913</d>
<d>0.73913043</d>
<d>0.76086957</d>
<d>0.7826087</d>
<d>0.80434783</d>
<d>0.82608696</d>
<d>0.84782609</d>
<d>0.86956522</d>
<d>0.89130435</d>
<d>0.91304348</d>
<d>0.93478261</d>
<d>0.95652174</d>
<d>0.97826087</d>
<d>1</d>
<d>0</d>
<d>0.0285724</d>
<d>0.05714253</d>
<d>0.08571493</d>
<d>0.11428507</d>
<d>0.14285747</d>
<d>0.1714276</d>
<d>0.2</d>
<d>0.2285724</d>
<d>0.25714253</d>
<d>0.28571493</d>
<d>0.31428507</d>
<d>0.34285747</d>
<d>0.37142987</d>
<d>0.4</d>
<d>0.4285724</d>
<d>0.45714253</d>
<d>0.48571493</d>
<d>0.51428507</d>
<d>0.54285747</d>
<d>0.57142987</d>
<d>0.6</d>
<d>0.6285724</d>
<d>0.65714253</d>
<d>0.68571493</d>
<d>0.71428507</d>
<d>0.74285747</d>
<d>0.77142987</d>
<d>0.8</d>
<d>0.8285724</d>
<d>0.85714253</d>
<d>0.88571493</d>
<d>0.91428734</d>
<d>0.94285747</d>
<d>0.97142987</d>
<d>1</d>
<d>0</d>
<d>0.01818242</d>
<d>0.0363634</d>
<d>0.05454582</d>
<d>0.0727268</d>
<d>0.09090922</d>
<d>0.1090902</d>
<d>0.12727262</d>
<d>0.14545504</d>
<d>0.16363602</d>
<d>0.18181844</d>
<d>0.19999942</d>
<d>0.21818184</d>
<d>0.23636427</d>
<d>0.25454524</d>
<d>0.27272767</d>
<d>0.29090864</d>
<d>0.30909107</d>
<d>0.32727204</d>
<d>0.34545447</d>
<d>0.36363689</d>
<d>0.38181787</d>
<d>0.40000029</d>
<d>0.41818127</d>
<d>0.43636369</d>
<d>0.45454467</d>
<d>0.47272709</d>
<d>0.49090951</d>
<d>0.50909049</d>
<d>0.52727291</d>
<d>0.54545389</d>
<d>0.56363631</d>
<d>0.58181873</d>
<d>0.59999971</d>
<d>0.61818213</d>
<d>0.63636311</d>
<d>0.65454553</d>
<d>0.67272651</d>
<d>0.69090893</d>
<d>0.70909136</d>
<d>0.72727233</d>
<d>0.74545476</d>
<d>0.76363573</d>
<d>0.78181816</d>
<d>0.79999913</d>
<d>0.81818156</d>
<d>0.83636398</d>
<d>0.85454496</d>
<d>0.87272738</d>
<d>0.89090836</d>
<d>0.90909078</d>
<d>0.9272732</d>
<d>0.94545418</d>
<d>0.9636366</d>
<d>0.98181758</d>
<d>1</d>
<d>0</d>
<d>0.02173876</d>
<d>0.04347894</d>
<d>0.0652177</d>
<d>0.08695646</d>
<d>0.10869522</d>
<d>0.1304354</d>
<d>0.15217416</d>
<d>0.17391292</d>
<d>0.19565168</d>
<d>0.21739186</d>
<d>0.23913062</d>
<d>0.26086938</d>
<d>0.28260814</d>
<d>0.30434832</d>
<d>0.32608708</d>
<d>0.34782584</d>
<d>0.36956602</d>
<d>0.39130478</d>
<d>0.41304354</d>
<d>0.4347823</d>
<d>0.45652248</d>
<d>0.47826124</d>
<d>0.5</d>
<d>0.52173876</d>
<d>0.54347894</d>
<d>0.5652177</d>
<d>0.58695646</d>
<d>0.60869522</d>
<d>0.6304354</d>
<d>0.65217416</d>
<d>0.67391292</d>
<d>0.6956531</d>
<d>0.71739186</d>
<d>0.73913062</d>
<d>0.76086938</d>
<d>0.78260956</d>
<d>0.80434832</d>
<d>0.82608708</d>
<d>0.84782584</d>
<d>0.86956602</d>
<d>0.89130478</d>
<d>0.91304354</d>
<d>0.93478372</d>
<d>0.95652248</d>
<d>0.97826124</d>
<d>1</d>
<d>0</d>
<d>0.01694885</d>
<d>0.03389881</d>
<d>0.05084766</d>
<d>0.06779652</d>
<d>0.08474537</d>
<d>0.10169533</d>
<d>0.11864418</d>
<d>0.13559303</d>
<d>0.15254188</d>
<d>0.16949184</d>
<d>0.1864407</d>
<d>0.20338955</d>
<d>0.2203384</d>
<d>0.23728836</d>
<d>0.25423721</d>
<d>0.27118607</d>
<d>0.28813602</d>
<d>0.30508488</d>
<d>0.32203373</d>
<d>0.33898258</d>
<d>0.35593254</d>
<d>0.37288139</d>
<d>0.38983025</d>
<d>0.4067791</d>
<d>0.42372906</d>
<d>0.44067791</d>
<d>0.45762676</d>
<d>0.47457561</d>
<d>0.49152557</d>
<d>0.50847443</d>
<d>0.52542328</d>
<d>0.54237324</d>
<d>0.55932209</d>
<d>0.57627094</d>
<d>0.59321979</d>
<d>0.61016975</d>
<d>0.62711861</d>
<d>0.64406746</d>
<d>0.66101631</d>
<d>0.67796627</d>
<d>0.69491512</d>
<d>0.71186398</d>
<d>0.72881393</d>
<d>0.74576279</d>
<d>0.76271164</d>
<d>0.77966049</d>
<d>0.79661045</d>
<d>0.8135593</d>
<d>0.83050816</d>
<d>0.84745701</d>
<d>0.86440697</d>
<d>0.88135582</d>
<d>0.89830467</d>
<d>0.91525352</d>
<d>0.93220348</d>
<d>0.94915234</d>
<d>0.96610119</d>
<d>0.98305115</d>
<d>1</d>
<d>0</d>
<d>0.01694885</d>
<d>0.03389881</d>
<d>0.05084766</d>
<d>0.06779652</d>
<d>0.08474537</d>
<d>0.10169533</d>
<d>0.11864418</d>
<d>0.13559303</d>
<d>0.15254188</d>
<d>0.16949184</d>
<d>0.1864407</d>
<d>0.20338955</d>
<d>0.2203384</d>
<d>0.23728836</d>
<d>0.25423721</d>
<d>0.27118607</d>
<d>0.28813602</d>
<d>0.30508488</d>
<d>0.32203373</d>
<d>0.33898258</d>
<d>0.35593254</d>
<d>0.37288139</d>
<d>0.38983025</d>
<d>0.4067791</d>
<d>0.42372906</d>
<d>0.44067791</d>
<d>0.45762676</d>
<d>0.47457561</d>
<d>0.49152557</d>
<d>0.50847443</d>
<d>0.52542328</d>
<d>0.54237324</d>
<d>0.55932209</d>
<d>0.57627094</d>
<d>0.59321979</d>
<d>0.61016975</d>
<d>0.62711861</d>
<d>0.64406746</d>
<d>0.66101631</d>
<d>0.67796627</d>
<d>0.69491512</d>
<d>0.71186398</d>
<d>0.72881393</d>
<d>0.74576279</d>
<d>0.76271164</d>
<d>0.77966049</d>
<d>0.79661045</d>
<d>0.8135593</d>
<d>0.83050816</d>
<d>0.84745701</d>
<d>0.86440697</d>
<d>0.88135582</d>
<d>0.89830467</d>
<d>0.91525352</d>
<d>0.93220348</d>
<d>0.94915234</d>
<d>0.96610119</d>
<d>0.98305115</d>
<d>1</d>
</Subcolumn>
</XColumn>
<XAdvancedColumn Version="1" Width="77" Decimals="8" Subcolumns="1">
<Title></Title>
<Subcolumn>
<d>0</d>
<d>0.01492583</d>
<d>0.02985043</d>
<d>0.04477627</d>
<d>0.0597021</d>
<d>0.0746267</d>
<d>0.08955253</d>
<d>0.10447713</d>
<d>0.11940297</d>
<d>0.1343288</d>
<d>0.1492534</d>
<d>0.16417923</d>
<d>0.17910507</d>
<d>0.19402967</d>
<d>0.2089555</d>
<d>0.2238801</d>
<d>0.23880593</d>
<d>0.25373177</d>
<d>0.26865637</d>
<d>0.2835822</d>
<d>0.29850803</d>
<d>0.31343263</d>
<d>0.32835847</d>
<d>0.3432843</d>
<d>0.3582089</d>
<d>0.37313473</d>
<d>0.38805933</d>
<d>0.40298517</d>
<d>0.417911</d>
<d>0.4328356</d>
<d>0.44776143</d>
<d>0.46268726</d>
<d>0.47761187</d>
<d>0.4925377</d>
<d>0.5074623</d>
<d>0.52238813</d>
<d>0.53731397</d>
<d>0.55223857</d>
<d>0.5671644</d>
<d>0.58209023</d>
<d>0.59701483</d>
<d>0.61194067</d>
<d>0.6268665</d>
<d>0.6417911</d>
<d>0.65671693</d>
<d>0.67164153</d>
<d>0.68656737</d>
<d>0.7014932</d>
<d>0.7164178</d>
<d>0.73134363</d>
<d>0.74626946</d>
<d>0.76119407</d>
<d>0.7761199</d>
<d>0.7910445</d>
<d>0.80597033</d>
<d>0.82089617</d>
<d>0.83582077</d>
<d>0.8507466</d>
<d>0.86567243</d>
<d>0.88059703</d>
<d>0.89552287</d>
<d>0.9104487</d>
<d>0.9253733</d>
<d>0.94029913</d>
<d>0.95522373</d>
<d>0.97014957</d>
<d>0.9850754</d>
<d>1</d>
<d>0</d>
<d>0.01886851</d>
<d>0.03773547</d>
<d>0.05660398</d>
<d>0.07547249</d>
<d>0.09433945</d>
<d>0.11320796</d>
<d>0.13207491</d>
<d>0.15094343</d>
<d>0.16981194</d>
<d>0.18867889</d>
<d>0.2075474</d>
<d>0.22641592</d>
<d>0.24528287</d>
<d>0.26415138</d>
<d>0.28301834</d>
<d>0.30188685</d>
<d>0.32075536</d>
<d>0.33962232</d>
<d>0.35849083</d>
<d>0.37735934</d>
<d>0.3962263</d>
<d>0.41509481</d>
<d>0.43396332</d>
<d>0.45283028</d>
<d>0.47169879</d>
<d>0.49056574</d>
<d>0.50943426</d>
<d>0.52830277</d>
<d>0.54716972</d>
<d>0.56603823</d>
<d>0.58490675</d>
<d>0.6037737</d>
<d>0.62264221</d>
<d>0.64150917</d>
<d>0.66037768</d>
<d>0.67924619</d>
<d>0.69811315</d>
<d>0.71698166</d>
<d>0.73585017</d>
<d>0.75471713</d>
<d>0.77358564</d>
<d>0.79245415</d>
<d>0.81132111</d>
<d>0.83018962</d>
<d>0.84905657</d>
<d>0.86792509</d>
<d>0.8867936</d>
<d>0.90566055</d>
<d>0.92452906</d>
<d>0.94339758</d>
<d>0.96226453</d>
<d>0.98113304</d>
<d>1</d>
<d>0</d>
<d>0.01666722</d>
<d>0.03333311</d>
<d>0.05000033</d>
<d>0.06666623</d>
<d>0.08333344</d>
<d>0.09999934</d>
<d>0.11666656</d>
<d>0.13333377</d>
<d>0.14999967</d>
<d>0.16666689</d>
<d>0.18333278</d>
<d>0.2</d>
<d>0.21666722</d>
<d>0.23333311</d>
<d>0.25000033</d>
<d>0.26666623</d>
<d>0.28333344</d>
<d>0.29999934</d>
<d>0.31666656</d>
<d>0.33333377</d>
<d>0.34999967</d>
<d>0.36666689</d>
<d>0.38333278</d>
<d>0.4</d>
<d>0.41666589</d>
<d>0.43333311</d>
<d>0.45000033</d>
<d>0.46666623</d>
<d>0.48333344</d>
<d>0.49999934</d>
<d>0.51666656</d>
<d>0.53333377</d>
<d>0.54999967</d>
<d>0.56666689</d>
<d>0.58333278</d>
<d>0.6</d>
<d>0.61666589</d>
<d>0.63333311</d>
<d>0.65000033</d>
<d>0.66666623</d>
<d>0.68333344</d>
<d>0.69999934</d>
<d>0.71666656</d>
<d>0.73333245</d>
<d>0.74999967</d>
<d>0.76666689</d>
<d>0.78333278</d>
<d>0.8</d>
<d>0.81666589</d>
<d>0.83333311</d>
<d>0.85000033</d>
<d>0.86666623</d>
<d>0.88333344</d>
<d>0.89999934</d>
<d>0.91666656</d>
<d>0.93333245</d>
<d>0.94999967</d>
<d>0.96666689</d>
<d>0.98333278</d>
<d>1</d>
<d>0</d>
<d>0.02381033</d>
<d>0.04761878</d>
<d>0.07142911</d>
<d>0.09523755</d>
<d>0.11904789</d>
<d>0.14285633</d>
<d>0.16666667</d>
<d>0.190477</d>
<d>0.21428544</d>
<d>0.23809578</d>
<d>0.26190422</d>
<d>0.28571456</d>
<d>0.30952489</d>
<d>0.33333333</d>
<d>0.35714367</d>
<d>0.38095211</d>
<d>0.40476245</d>
<d>0.42857089</d>
<d>0.45238122</d>
<d>0.47619156</d>
<d>0.5</d>
<d>0.52381033</d>
<d>0.54761878</d>
<d>0.57142911</d>
<d>0.59523755</d>
<d>0.61904789</d>
<d>0.64285822</d>
<d>0.66666667</d>
<d>0.690477</d>
<d>0.71428544</d>
<d>0.73809578</d>
<d>0.76190611</d>
<d>0.78571456</d>
<d>0.80952489</d>
<d>0.83333333</d>
<d>0.85714367</d>
<d>0.88095211</d>
<d>0.90476245</d>
<d>0.92857278</d>
<d>0.95238122</d>
<d>0.97619156</d>
<d>1</d>
<d>0</d>
<d>0.02325581</d>
<d>0.04651163</d>
<d>0.06976744</d>
<d>0.09302326</d>
<d>0.11627907</d>
<d>0.13953488</d>
<d>0.1627907</d>
<d>0.18604651</d>
<d>0.20930233</d>
<d>0.23255814</d>
<d>0.25581395</d>
<d>0.27906977</d>
<d>0.30232558</d>
<d>0.3255814</d>
<d>0.34883721</d>
<d>0.37209302</d>
<d>0.39534884</d>
<d>0.41860465</d>
<d>0.44186047</d>
<d>0.46511628</d>
<d>0.48837209</d>
<d>0.51162791</d>
<d>0.53488372</d>
<d>0.55813953</d>
<d>0.58139535</d>
<d>0.60465116</d>
<d>0.62790698</d>
<d>0.65116279</d>
<d>0.6744186</d>
<d>0.69767442</d>
<d>0.72093023</d>
<d>0.74418605</d>
<d>0.76744186</d>
<d>0.79069767</d>
<d>0.81395349</d>
<d>0.8372093</d>
<d>0.86046512</d>
<d>0.88372093</d>
<d>0.90697674</d>
<d>0.93023256</d>
<d>0.95348837</d>
<d>0.97674419</d>
<d>1</d>
<d>0</d>
<d>0.02173913</d>
<d>0.04347826</d>
<d>0.06521739</d>
<d>0.08695652</d>
<d>0.10869565</d>
<d>0.13043478</d>
<d>0.15217391</d>
<d>0.17391304</d>
<d>0.19565217</d>
<d>0.2173913</d>
<d>0.23913043</d>
<d>0.26086957</d>
<d>0.2826087</d>
<d>0.30434783</d>
<d>0.32608696</d>
<d>0.34782609</d>
<d>0.36956522</d>
<d>0.39130435</d>
<d>0.41304348</d>
<d>0.43478261</d>
<d>0.45652174</d>
<d>0.47826087</d>
<d>0.5</d>
<d>0.52173913</d>
<d>0.54347826</d>
<d>0.56521739</d>
<d>0.58695652</d>
<d>0.60869565</d>
<d>0.63043478</d>
<d>0.65217391</d>
<d>0.67391304</d>
<d>0.69565217</d>
<d>0.7173913</d>
<d>0.73913043</d>
<d>0.76086957</d>
<d>0.7826087</d>
<d>0.80434783</d>
<d>0.82608696</d>
<d>0.84782609</d>
<d>0.86956522</d>
<d>0.89130435</d>
<d>0.91304348</d>
<d>0.93478261</d>
<d>0.95652174</d>
<d>0.97826087</d>
<d>1</d>
<d>0</d>
<d>0.0285724</d>
<d>0.05714253</d>
<d>0.08571493</d>
<d>0.11428507</d>
<d>0.14285747</d>
<d>0.1714276</d>
<d>0.2</d>
<d>0.2285724</d>
<d>0.25714253</d>
<d>0.28571493</d>
<d>0.31428507</d>
<d>0.34285747</d>
<d>0.37142987</d>
<d>0.4</d>
<d>0.4285724</d>
<d>0.45714253</d>
<d>0.48571493</d>
<d>0.51428507</d>
<d>0.54285747</d>
<d>0.57142987</d>
<d>0.6</d>
<d>0.6285724</d>
<d>0.65714253</d>
<d>0.68571493</d>
<d>0.71428507</d>
<d>0.74285747</d>
<d>0.77142987</d>
<d>0.8</d>
<d>0.8285724</d>
<d>0.85714253</d>
<d>0.88571493</d>
<d>0.91428734</d>
<d>0.94285747</d>
<d>0.97142987</d>
<d>1</d>
<d>0</d>
<d>0.01818242</d>
<d>0.0363634</d>
<d>0.05454582</d>
<d>0.0727268</d>
<d>0.09090922</d>
<d>0.1090902</d>
<d>0.12727262</d>
<d>0.14545504</d>
<d>0.16363602</d>
<d>0.18181844</d>
<d>0.19999942</d>
<d>0.21818184</d>
<d>0.23636427</d>
<d>0.25454524</d>
<d>0.27272767</d>
<d>0.29090864</d>
<d>0.30909107</d>
<d>0.32727204</d>
<d>0.34545447</d>
<d>0.36363689</d>
<d>0.38181787</d>
<d>0.40000029</d>
<d>0.41818127</d>
<d>0.43636369</d>
<d>0.45454467</d>
<d>0.47272709</d>
<d>0.49090951</d>
<d>0.50909049</d>
<d>0.52727291</d>
<d>0.54545389</d>
<d>0.56363631</d>
<d>0.58181873</d>
<d>0.59999971</d>
<d>0.61818213</d>
<d>0.63636311</d>
<d>0.65454553</d>
<d>0.67272651</d>
<d>0.69090893</d>
<d>0.70909136</d>
<d>0.72727233</d>
<d>0.74545476</d>
<d>0.76363573</d>
<d>0.78181816</d>
<d>0.79999913</d>
<d>0.81818156</d>
<d>0.83636398</d>
<d>0.85454496</d>
<d>0.87272738</d>
<d>0.89090836</d>
<d>0.90909078</d>
<d>0.9272732</d>
<d>0.94545418</d>
<d>0.9636366</d>
<d>0.98181758</d>
<d>1</d>
<d>0</d>
<d>0.02173876</d>
<d>0.04347894</d>
<d>0.0652177</d>
<d>0.08695646</d>
<d>0.10869522</d>
<d>0.1304354</d>
<d>0.15217416</d>
<d>0.17391292</d>
<d>0.19565168</d>
<d>0.21739186</d>
<d>0.23913062</d>
<d>0.26086938</d>
<d>0.28260814</d>
<d>0.30434832</d>
<d>0.32608708</d>
<d>0.34782584</d>
<d>0.36956602</d>
<d>0.39130478</d>
<d>0.41304354</d>
<d>0.4347823</d>
<d>0.45652248</d>
<d>0.47826124</d>
<d>0.5</d>
<d>0.52173876</d>
<d>0.54347894</d>
<d>0.5652177</d>
<d>0.58695646</d>
<d>0.60869522</d>
<d>0.6304354</d>
<d>0.65217416</d>
<d>0.67391292</d>
<d>0.6956531</d>
<d>0.71739186</d>
<d>0.73913062</d>
<d>0.76086938</d>
<d>0.78260956</d>
<d>0.80434832</d>
<d>0.82608708</d>
<d>0.84782584</d>
<d>0.86956602</d>
<d>0.89130478</d>
<d>0.91304354</d>
<d>0.93478372</d>
<d>0.95652248</d>
<d>0.97826124</d>
<d>1</d>
<d>0</d>
<d>0.01694885</d>
<d>0.03389881</d>
<d>0.05084766</d>
<d>0.06779652</d>
<d>0.08474537</d>
<d>0.10169533</d>
<d>0.11864418</d>
<d>0.13559303</d>
<d>0.15254188</d>
<d>0.16949184</d>
<d>0.1864407</d>
<d>0.20338955</d>
<d>0.2203384</d>
<d>0.23728836</d>
<d>0.25423721</d>
<d>0.27118607</d>
<d>0.28813602</d>
<d>0.30508488</d>
<d>0.32203373</d>
<d>0.33898258</d>
<d>0.35593254</d>
<d>0.37288139</d>
<d>0.38983025</d>
<d>0.4067791</d>
<d>0.42372906</d>
<d>0.44067791</d>
<d>0.45762676</d>
<d>0.47457561</d>
<d>0.49152557</d>
<d>0.50847443</d>
<d>0.52542328</d>
<d>0.54237324</d>
<d>0.55932209</d>
<d>0.57627094</d>
<d>0.59321979</d>
<d>0.61016975</d>
<d>0.62711861</d>
<d>0.64406746</d>
<d>0.66101631</d>
<d>0.67796627</d>
<d>0.69491512</d>
<d>0.71186398</d>
<d>0.72881393</d>
<d>0.74576279</d>
<d>0.76271164</d>
<d>0.77966049</d>
<d>0.79661045</d>
<d>0.8135593</d>
<d>0.83050816</d>
<d>0.84745701</d>
<d>0.86440697</d>
<d>0.88135582</d>
<d>0.89830467</d>
<d>0.91525352</d>
<d>0.93220348</d>
<d>0.94915234</d>
<d>0.96610119</d>
<d>0.98305115</d>
<d>1</d>
<d>0</d>
<d>0.01694885</d>
<d>0.03389881</d>
<d>0.05084766</d>
<d>0.06779652</d>
<d>0.08474537</d>
<d>0.10169533</d>
<d>0.11864418</d>
<d>0.13559303</d>
<d>0.15254188</d>
<d>0.16949184</d>
<d>0.1864407</d>
<d>0.20338955</d>
<d>0.2203384</d>
<d>0.23728836</d>
<d>0.25423721</d>
<d>0.27118607</d>
<d>0.28813602</d>
<d>0.30508488</d>
<d>0.32203373</d>
<d>0.33898258</d>
<d>0.35593254</d>
<d>0.37288139</d>
<d>0.38983025</d>
<d>0.4067791</d>
<d>0.42372906</d>
<d>0.44067791</d>
<d>0.45762676</d>
<d>0.47457561</d>
<d>0.49152557</d>
<d>0.50847443</d>
<d>0.52542328</d>
<d>0.54237324</d>
<d>0.55932209</d>
<d>0.57627094</d>
<d>0.59321979</d>
<d>0.61016975</d>
<d>0.62711861</d>
<d>0.64406746</d>
<d>0.66101631</d>
<d>0.67796627</d>
<d>0.69491512</d>
<d>0.71186398</d>
<d>0.72881393</d>
<d>0.74576279</d>
<d>0.76271164</d>
<d>0.77966049</d>
<d>0.79661045</d>
<d>0.8135593</d>
<d>0.83050816</d>
<d>0.84745701</d>
<d>0.86440697</d>
<d>0.88135582</d>
<d>0.89830467</d>
<d>0.91525352</d>
<d>0.93220348</d>
<d>0.94915234</d>
<d>0.96610119</d>
<d>0.98305115</d>
<d>1</d>
</Subcolumn>
</XAdvancedColumn>
<YColumn Width="81" Decimals="8" Subcolumns="1">
<Title></Title>
<Subcolumn>
<d>0.4586085</d>
<d>0.6604827</d>
<d>0.59097278</d>
<d>0.83803739</d>
<d>0.79916853</d>
<d>0.99218767</d>
<d>0.92301175</d>
<d>1</d>
<d>0.82012632</d>
<d>0.76318076</d>
<d>0.76207558</d>
<d>0.77059392</d>
<d>0.92904818</d>
<d>0.92261258</d>
<d>0.87708546</d>
<d>0.71142984</d>
<d>0.68394956</d>
<d>0.81138531</d>
<d>0.79377566</d>
<d>0.72669063</d>
<d>0.68221439</d>
<d>0.72052386</d>
<d>0.90904351</d>
<d>0.79301805</d>
<d>0.85561717</d>
<d>0.79431332</d>
<d>0.91419742</d>
<d>0.86182738</d>
<d>0.69353779</d>
<d>0.75172974</d>
<d>0.8322725</d>
<d>0.50442074</d>
<d>0.53243325</d>
<d>0.37334358</d>
<d>0.63896009</d>
<d>0.48321585</d>
<d>0.71901408</d>
<d>0.86625899</d>
<d>0.68977147</d>
<d>0.62773174</d>
<d>0.63456651</d>
<d>0.7494026</d>
<d>0.61730715</d>
<d>0.62252623</d>
<d>0.59091304</d>
<d>0.52384159</d>
<d>0.54324886</d>
<d>0.48357157</d>
<d>0.65919015</d>
<d>0.70012545</d>
<d>0.7115982</d>
<d>0.6508999</d>
<d>0.45864923</d>
<d>0.46653759</d>
<d>0.77263322</d>
<d>0.76176058</d>
<d>0.59143169</d>
<d>0.77423805</d>
<d>0.97557459</d>
<d>0.63391752</d>
<d>0.52528349</d>
<d>0.53699248</d>
<d>0.65995319</d>
<d>0.6774515</d>
<d>0.76158137</d>
<d>0.82906013</d>
<d>0.66430061</d>
<d>0.32585319</d>
</Subcolumn>
</YColumn>
<YColumn Width="81" Decimals="8" Subcolumns="1">
<Title></Title>
<Subcolumn>
<d></d>
<d></d>
<d></d>
<d></d>
<d></d>
<d></d>
<d></d>
<d></d>
<d></d>
<d></d>
<d></d>
<d></d>
<d></d>
<d></d>
<d></d>
<d></d>
<d></d>
<d></d>
<d></d>
<d></d>
<d></d>
<d></d>
<d></d>
<d></d>
<d></d>
<d></d>
<d></d>
<d></d>
<d></d>
<d></d>
<d></d>
<d></d>
<d></d>
<d></d>
<d></d>
<d></d>
<d></d>
<d></d>
<d></d>
<d></d>
<d></d>
<d></d>
<d></d>
<d></d>
<d></d>
<d></d>
<d></d>
<d></d>
<d></d>
<d></d>
<d></d>
<d></d>
<d></d>
<d></d>
<d></d>
<d></d>
<d></d>
<d></d>
<d></d>
<d></d>
<d></d>
<d></d>
<d></d>
<d></d>
<d></d>
<d></d>
<d></d>
<d></d>
<d>0.64888716</d>
<d>0.62337565</d>
<d>0.60415151</d>
<d>0.75277058</d>
<d>0.82251912</d>
<d>0.84286685</d>
<d>0.5674484</d>
<d>0.67433037</d>
<d>0.347462</d>
<d>0.25447988</d>
<d>0.4922902</d>
<d>0.47965739</d>
<d>0.51101913</d>
<d>0.51199587</d>
<d>0.5410626</d>
<d>0.62629222</d>
<d>0.50305489</d>
<d>0.7389766</d>
<d>0.59684982</d>
<d>0.67995519</d>
<d>0.65466908</d>
<d>0.75276033</d>
<d>0.85055104</d>
<d>0.61227626</d>
<d>0.80800112</d>
<d>0.61673309</d>
<d>0.71267618</d>
<d>0.69762883</d>
<d>0.75567349</d>
<d>0.8337756</d>
<d>0.75996981</d>
<d>0.83116298</d>
<d>0.92338009</d>
<d>0.62443777</d>
<d>0.60063386</d>
<d>0.55351782</d>
<d>0.62444119</d>
<d>0.70514568</d>
<d>0.65119583</d>
<d>0.59324679</d>
<d>0.8805228</d>
<d>0.75576912</d>
<d>0.80145078</d>
<d>0.76183792</d>
<d>1</d>
<d>0.74228593</d>
<d>0.61459859</d>
<d>0.41161645</d>
<d>0.59499879</d>
<d>0.66290312</d>
<d>0.7116243</d>
<d>0.80340768</d>
<d>0.48107811</d>
<d>0.28080421</d>
</Subcolumn>
</YColumn>
<YColumn Width="81" Decimals="8" Subcolumns="1">
<Title></Title>
<Subcolumn>
<d></d>
<d></d>
<d></d>
<d></d>
<d></d>
<d></d>
<d></d>
<d></d>
<d></d>
<d></d>
<d></d>
<d></d>
<d></d>
<d></d>
<d></d>
<d></d>
<d></d>
<d></d>
<d></d>
<d></d>
<d></d>
<d></d>
<d></d>
<d></d>
<d></d>
<d></d>
<d></d>
<d></d>
<d></d>
<d></d>
<d></d>
<d></d>
<d></d>
<d></d>
<d></d>
<d></d>
<d></d>
<d></d>
<d></d>
<d></d>
<d></d>
<d></d>
<d></d>
<d></d>
<d></d>
<d></d>
<d></d>
<d></d>
<d></d>
<d></d>
<d></d>
<d></d>
<d></d>
<d></d>
<d></d>
<d></d>
<d></d>
<d></d>
<d></d>
<d></d>
<d></d>
<d></d>
<d></d>
<d></d>
<d></d>
<d></d>
<d></d>
<d></d>
<d></d>
<d></d>
<d></d>
<d></d>
<d></d>
<d></d>
<d></d>
<d></d>
<d></d>
<d></d>
<d></d>
<d></d>
<d></d>
<d></d>
<d></d>
<d></d>
<d></d>
<d></d>
<d></d>
<d></d>
<d></d>
<d></d>
<d></d>
<d></d>
<d></d>
<d></d>
<d></d>
<d></d>
<d></d>
<d></d>
<d></d>
<d></d>
<d></d>
<d></d>
<d></d>
<d></d>
<d></d>
<d></d>
<d></d>
<d></d>
<d></d>
<d></d>
<d></d>
<d></d>
<d></d>
<d></d>
<d></d>
<d></d>
<d></d>
<d></d>
<d></d>
<d></d>
<d></d>
<d></d>
<d>0.99012815</d>
<d>0.78767103</d>
<d>0.78145731</d>
<d>0.84455256</d>
<d>0.67959185</d>
<d>0.66528852</d>
<d>0.70486421</d>
<d>0.73623254</d>
<d>0.74643086</d>
<d>0.72199075</d>
<d>0.6764395</d>
<d>0.5861077</d>
<d>0.55340136</d>
<d>0.77158546</d>
<d>0.80470926</d>
<d>0.5954149</d>
<d>0.51843378</d>
<d>0.70364394</d>
<d>0.63742845</d>
<d>0.53615707</d>
<d>0.64521835</d>
<d>0.58792204</d>
<d>0.48768896</d>
<d>0.55905044</d>
<d>0.57695035</d>
<d>0.46904779</d>
<d>0.6666854</d>
<d>0.56704907</d>
<d>0.63011488</d>
<d>0.68012706</d>
<d>0.33450275</d>
<d>0.59919077</d>
<d>0.58753669</d>
<d>0.39738927</d>
<d>0.43042209</d>
<d>0.35159986</d>
<d>0.42174107</d>
<d>0.48266607</d>
<d>0.41710353</d>
<d>0.47579672</d>
<d>0.55007239</d>
<d>0.4131778</d>
<d>0.45117732</d>
<d>0.56993382</d>
<d>0.44790722</d>
<d>0.54858452</d>
<d>0.55655371</d>
<d>0.57495939</d>
<d>0.62083711</d>
<d>0.61286792</d>
<d>0.71955289</d>
<d>0.7161035</d>
<d>0.83575112</d>
<d>1</d>
<d>0.84027092</d>
<d>0.70245579</d>
<d>0.62012262</d>
<d>0.76025786</d>
<d>0.68405011</d>
<d>0.47906682</d>
<d>0.56196463</d>
</Subcolumn>
</YColumn>
<YColumn Width="81" Decimals="8" Subcolumns="1">
<Title></Title>
<Subcolumn>
<d></d>
<d></d>
<d></d>
<d></d>
<d></d>
<d></d>
<d></d>
<d></d>
<d></d>
<d></d>
<d></d>
<d></d>
<d></d>
<d></d>
<d></d>
<d></d>
<d></d>
<d></d>
<d></d>
<d></d>
<d></d>
<d></d>
<d></d>
<d></d>
<d></d>
<d></d>
<d></d>
<d></d>
<d></d>
<d></d>
<d></d>
<d></d>
<d></d>
<d></d>
<d></d>
<d></d>
<d></d>
<d></d>
<d></d>
<d></d>
<d></d>
<d></d>
<d></d>
<d></d>
<d></d>
<d></d>
<d></d>
<d></d>
<d></d>
<d></d>
<d></d>
<d></d>
<d></d>
<d></d>
<d></d>
<d></d>
<d></d>
<d></d>
<d></d>
<d></d>
<d></d>
<d></d>
<d></d>
<d></d>
<d></d>
<d></d>
<d></d>
<d></d>
<d></d>
<d></d>
<d></d>
<d></d>
<d></d>
<d></d>
<d></d>
<d></d>
<d></d>
<d></d>
<d></d>
<d></d>
<d></d>
<d></d>
<d></d>
<d></d>
<d></d>
<d></d>
<d></d>
<d></d>
<d></d>
<d></d>
<d></d>
<d></d>
<d></d>
<d></d>
<d></d>
<d></d>
<d></d>
<d></d>
<d></d>
<d></d>
<d></d>
<d></d>
<d></d>
<d></d>
<d></d>
<d></d>
<d></d>
<d></d>
<d></d>
<d></d>
<d></d>
<d></d>
<d></d>
<d></d>
<d></d>
<d></d>
<d></d>
<d></d>
<d></d>
<d></d>
<d></d>
<d></d>
<d></d>
<d></d>
<d></d>
<d></d>
<d></d>
<d></d>
<d></d>
<d></d>
<d></d>
<d></d>
<d></d>
<d></d>
<d></d>
<d></d>
<d></d>
<d></d>
<d></d>
<d></d>
<d></d>
<d></d>
<d></d>
<d></d>
<d></d>
<d></d>
<d></d>
<d></d>
<d></d>
<d></d>
<d></d>
<d></d>
<d></d>
<d></d>
<d></d>
<d></d>
<d></d>
<d></d>
<d></d>
<d></d>
<d></d>
<d></d>
<d></d>
<d></d>
<d></d>
<d></d>
<d></d>
<d></d>
<d></d>
<d></d>
<d></d>
<d></d>
<d></d>
<d></d>
<d></d>
<d></d>
<d></d>
<d></d>
<d></d>
<d></d>
<d></d>
<d></d>
<d></d>
<d>0.74556204</d>
<d>0.91845042</d>
<d>0.62333087</d>
<d>0.71113571</d>
<d>1</d>
<d>0.65862205</d>
<d>0.60481857</d>
<d>0.36553416</d>
<d>0.40498557</d>
<d>0.39218055</d>
<d>0.53507869</d>
<d>0.65093158</d>
<d>0.55232354</d>
<d>0.60217555</d>
<d>0.57159632</d>
<d>0.54015224</d>
<d>0.54750721</d>
<d>0.65393247</d>
<d>0.51200355</d>
<d>0.48958077</d>
<d>0.63144632</d>
<d>0.64304726</d>
<d>0.69289927</d>
<d>0.83787008</d>
<d>0.85206931</d>
<d>0.81403073</d>
<d>0.72316163</d>
<d>0.79177943</d>
<d>0.74556204</d>
<d>0.63615827</d>
<d>0.45418521</d>
<d>0.48774296</d>
<d>0.72265465</d>
<d>0.74860394</d>
<d>0.69002513</d>
<d>0.65133046</d>
<d>0.89011161</d>
<d>0.72242352</d>
<d>0.92806445</d>
<d>0.79501144</d>
<d>0.54488656</d>
<d>0.56908378</d>
<d>0.63372774</d>
</Subcolumn>
</YColumn>
<YColumn Width="81" Decimals="8" Subcolumns="1">
<Title></Title>
<Subcolumn>
<d></d>
<d></d>
<d></d>
<d></d>
<d></d>
<d></d>
<d></d>
<d></d>
<d></d>
<d></d>
<d></d>
<d></d>
<d></d>
<d></d>
<d></d>
<d></d>
<d></d>
<d></d>
<d></d>
<d></d>
<d></d>
<d></d>
<d></d>
<d></d>
<d></d>
<d></d>
<d></d>
<d></d>
<d></d>
<d></d>
<d></d>
<d></d>
<d></d>
<d></d>
<d></d>
<d></d>
<d></d>
<d></d>
<d></d>
<d></d>
<d></d>
<d></d>
<d></d>
<d></d>
<d></d>
<d></d>
<d></d>
<d></d>
<d></d>
<d></d>
<d></d>
<d></d>
<d></d>
<d></d>
<d></d>
<d></d>
<d></d>
<d></d>
<d></d>
<d></d>
<d></d>
<d></d>
<d></d>
<d></d>
<d></d>
<d></d>
<d></d>
<d></d>
<d></d>
<d></d>
<d></d>
<d></d>
<d></d>
<d></d>
<d></d>
<d></d>
<d></d>
<d></d>
<d></d>
<d></d>
<d></d>
<d></d>
<d></d>
<d></d>
<d></d>
<d></d>
<d></d>
<d></d>
<d></d>
<d></d>
<d></d>
<d></d>
<d></d>
<d></d>
<d></d>
<d></d>
<d></d>
<d></d>
<d></d>
<d></d>
<d></d>
<d></d>
<d></d>
<d></d>
<d></d>
<d></d>
<d></d>
<d></d>
<d></d>
<d></d>
<d></d>
<d></d>
<d></d>
<d></d>
<d></d>
<d></d>
<d></d>
<d></d>
<d></d>
<d></d>
<d></d>
<d></d>
<d></d>
<d></d>
<d></d>
<d></d>
<d></d>
<d></d>
<d></d>
<d></d>
<d></d>
<d></d>
<d></d>
<d></d>
<d></d>
<d></d>
<d></d>
<d></d>
<d></d>
<d></d>
<d></d>
<d></d>
<d></d>
<d></d>
<d></d>
<d></d>
<d></d>
<d></d>
<d></d>
<d></d>
<d></d>
<d></d>
<d></d>
<d></d>
<d></d>
<d></d>
<d></d>
<d></d>
<d></d>
<d></d>
<d></d>
<d></d>
<d></d>
<d></d>
<d></d>
<d></d>
<d></d>
<d></d>
<d></d>
<d></d>
<d></d>
<d></d>
<d></d>
<d></d>
<d></d>
<d></d>
<d></d>
<d></d>
<d></d>
<d></d>
<d></d>
<d></d>
<d></d>
<d></d>
<d></d>
<d></d>
<d></d>
<d></d>
<d></d>
<d></d>
<d></d>
<d></d>
<d></d>
<d></d>
<d></d>
<d></d>
<d></d>
<d></d>
<d></d>
<d></d>
<d></d>
<d></d>
<d></d>
<d></d>
<d></d>
<d></d>
<d></d>
<d></d>
<d></d>
<d></d>
<d></d>
<d></d>
<d></d>
<d></d>
<d></d>
<d></d>
<d></d>
<d></d>
<d></d>
<d></d>
<d></d>
<d></d>
<d></d>
<d></d>
<d></d>
<d></d>
<d>0.81555405</d>
<d>0.88306852</d>
<d>0.83887031</d>
<d>0.81207597</d>
<d>0.89368121</d>
<d>0.94979849</d>
<d>0.82173244</d>
<d>0.73386127</d>
<d>0.69557883</d>
<d>0.80737568</d>
<d>0.81190089</d>
<d>0.77153093</d>
<d>0.80494136</d>
<d>0.71767625</d>
<d>0.73994875</d>
<d>0.78223452</d>
<d>0.76413706</d>
<d>0.78640956</d>
<d>0.80868207</d>
<d>0.86009906</d>
<d>0.85192069</d>
<d>0.70627906</d>
<d>0.67844096</d>
<d>0.76839965</d>
<d>0.85035505</d>
<d>0.97868372</d>
<d>0.94457968</d>
<d>0.80485382</d>
<d>0.73403299</d>
<d>0.66974071</d>
<d>0.64607428</d>
<d>0.59187281</d>
<d>0.63554914</d>
<d>0.7671808</d>
<d>0.66834678</d>
<d>0.60997027</d>
<d>0.81511971</d>
<d>1</d>
<d>0.95267051</d>
<d>0.96423942</d>
<d>0.9892964</d>
<d>0.8375673</d>
<d>0.75021801</d>
<d>0.84548304</d>
</Subcolumn>
</YColumn>
<YColumn Width="81" Decimals="8" Subcolumns="1">
<Title></Title>
<Subcolumn>
<d></d>
<d></d>
<d></d>
<d></d>
<d></d>
<d></d>
<d></d>
<d></d>
<d></d>
<d></d>
<d></d>
<d></d>
<d></d>
<d></d>
<d></d>
<d></d>
<d></d>
<d></d>
<d></d>
<d></d>
<d></d>
<d></d>
<d></d>
<d></d>
<d></d>
<d></d>
<d></d>
<d></d>
<d></d>
<d></d>
<d></d>
<d></d>
<d></d>
<d></d>
<d></d>
<d></d>
<d></d>
<d></d>
<d></d>
<d></d>
<d></d>
<d></d>
<d></d>
<d></d>
<d></d>
<d></d>
<d></d>
<d></d>
<d></d>
<d></d>
<d></d>
<d></d>
<d></d>
<d></d>
<d></d>
<d></d>
<d></d>
<d></d>
<d></d>
<d></d>
<d></d>
<d></d>
<d></d>
<d></d>
<d></d>
<d></d>
<d></d>
<d></d>
<d></d>
<d></d>
<d></d>
<d></d>
<d></d>
<d></d>
<d></d>
<d></d>
<d></d>
<d></d>
<d></d>
<d></d>
<d></d>
<d></d>
<d></d>
<d></d>
<d></d>
<d></d>
<d></d>
<d></d>
<d></d>
<d></d>
<d></d>
<d></d>
<d></d>
<d></d>
<d></d>
<d></d>
<d></d>
<d></d>
<d></d>
<d></d>
<d></d>
<d></d>
<d></d>
<d></d>
<d></d>
<d></d>
<d></d>
<d></d>
<d></d>
<d></d>
<d></d>
<d></d>
<d></d>
<d></d>
<d></d>
<d></d>
<d></d>
<d></d>
<d></d>
<d></d>
<d></d>
<d></d>
<d></d>
<d></d>
<d></d>
<d></d>
<d></d>
<d></d>
<d></d>
<d></d>
<d></d>
<d></d>
<d></d>
<d></d>
<d></d>
<d></d>
<d></d>
<d></d>
<d></d>
<d></d>
<d></d>
<d></d>
<d></d>
<d></d>
<d></d>
<d></d>
<d></d>
<d></d>
<d></d>
<d></d>
<d></d>
<d></d>
<d></d>
<d></d>
<d></d>
<d></d>
<d></d>
<d></d>
<d></d>
<d></d>
<d></d>
<d></d>
<d></d>
<d></d>
<d></d>
<d></d>
<d></d>
<d></d>
<d></d>
<d></d>
<d></d>
<d></d>
<d></d>
<d></d>
<d></d>
<d></d>
<d></d>
<d></d>
<d></d>
<d></d>
<d></d>
<d></d>
<d></d>
<d></d>
<d></d>
<d></d>
<d></d>
<d></d>
<d></d>
<d></d>
<d></d>
<d></d>
<d></d>
<d></d>
<d></d>
<d></d>
<d></d>
<d></d>
<d></d>
<d></d>
<d></d>
<d></d>
<d></d>
<d></d>
<d></d>
<d></d>
<d></d>
<d></d>
<d></d>
<d></d>
<d></d>
<d></d>
<d></d>
<d></d>
<d></d>
<d></d>
<d></d>
<d></d>
<d></d>
<d></d>
<d></d>
<d></d>
<d></d>
<d></d>
<d></d>
<d></d>
<d></d>
<d></d>
<d></d>
<d></d>
<d></d>
<d></d>
<d></d>
<d></d>
<d></d>
<d></d>
<d></d>
<d></d>
<d></d>
<d></d>
<d></d>
<d></d>
<d></d>
<d></d>
<d></d>
<d></d>
<d></d>
<d></d>
<d></d>
<d></d>
<d></d>
<d></d>
<d></d>
<d></d>
<d></d>
<d></d>
<d></d>
<d></d>
<d></d>
<d></d>
<d></d>
<d></d>
<d></d>
<d></d>
<d></d>
<d></d>
<d></d>
<d></d>
<d></d>
<d></d>
<d>0.60577463</d>
<d>0.7449083</d>
<d>0.85505089</d>
<d>0.65438326</d>
<d>0.71848059</d>
<d>0.80532954</d>
<d>0.84414375</d>
<d>0.7387294</d>
<d>0.69238127</d>
<d>0.59218296</d>
<d>0.56491035</d>
<d>0.63886267</d>
<d>0.58359371</d>
<d>0.52724392</d>
<d>0.63934411</d>
<d>0.71989619</d>
<d>0.83787558</d>
<d>0.94277343</d>
<d>1</d>
<d>0.61339782</d>
<d>0.55960822</d>
<d>0.64151533</d>
<d>0.7257722</d>
<d>0.73330613</d>
<d>0.58992246</d>
<d>0.67647171</d>
<d>0.57787073</d>
<d>0.63036589</d>
<d>0.58341517</d>
<d>0.54978511</d>
<d>0.54640871</d>
<d>0.60212723</d>
<d>0.59769869</d>
<d>0.72025647</d>
<d>0.68906864</d>
<d>0.66776131</d>
<d>0.72516962</d>
<d>0.6708667</d>
<d>0.5712391</d>
<d>0.72908802</d>
<d>0.48445072</d>
<d>0.557437</d>
<d>0.49469788</d>
<d>0.75427868</d>
<d>0.86439257</d>
<d>0.54116398</d>
<d>0.28694588</d>
</Subcolumn>
</YColumn>
<YColumn Width="81" Decimals="8" Subcolumns="1">
<Title></Title>
<Subcolumn>
<d></d>
<d></d>
<d></d>
<d></d>
<d></d>
<d></d>
<d></d>
<d></d>
<d></d>
<d></d>
<d></d>
<d></d>
<d></d>
<d></d>
<d></d>
<d></d>
<d></d>
<d></d>
<d></d>
<d></d>
<d></d>
<d></d>
<d></d>
<d></d>
<d></d>
<d></d>
<d></d>
<d></d>
<d></d>
<d></d>
<d></d>
<d></d>
<d></d>
<d></d>
<d></d>
<d></d>
<d></d>
<d></d>
<d></d>
<d></d>
<d></d>
<d></d>
<d></d>
<d></d>
<d></d>
<d></d>
<d></d>
<d></d>
<d></d>
<d></d>
<d></d>
<d></d>
<d></d>
<d></d>
<d></d>
<d></d>
<d></d>
<d></d>
<d></d>
<d></d>
<d></d>
<d></d>
<d></d>
<d></d>
<d></d>
<d></d>
<d></d>
<d></d>
<d></d>
<d></d>
<d></d>
<d></d>
<d></d>
<d></d>
<d></d>
<d></d>
<d></d>
<d></d>
<d></d>
<d></d>
<d></d>
<d></d>
<d></d>
<d></d>
<d></d>
<d></d>
<d></d>
<d></d>
<d></d>
<d></d>
<d></d>
<d></d>
<d></d>
<d></d>
<d></d>
<d></d>
<d></d>
<d></d>
<d></d>
<d></d>
<d></d>
<d></d>
<d></d>
<d></d>
<d></d>
<d></d>
<d></d>
<d></d>
<d></d>
<d></d>
<d></d>
<d></d>
<d></d>
<d></d>
<d></d>
<d></d>
<d></d>
<d></d>
<d></d>
<d></d>
<d></d>
<d></d>
<d></d>
<d></d>
<d></d>
<d></d>
<d></d>
<d></d>
<d></d>
<d></d>
<d></d>
<d></d>
<d></d>
<d></d>
<d></d>
<d></d>
<d></d>
<d></d>
<d></d>
<d></d>
<d></d>
<d></d>
<d></d>
<d></d>
<d></d>
<d></d>
<d></d>
<d></d>
<d></d>
<d></d>
<d></d>
<d></d>
<d></d>
<d></d>
<d></d>
<d></d>
<d></d>
<d></d>
<d></d>
<d></d>
<d></d>
<d></d>
<d></d>
<d></d>
<d></d>
<d></d>
<d></d>
<d></d>
<d></d>
<d></d>
<d></d>
<d></d>
<d></d>
<d></d>
<d></d>
<d></d>
<d></d>
<d></d>
<d></d>
<d></d>
<d></d>
<d></d>
<d></d>
<d></d>
<d></d>
<d></d>
<d></d>
<d></d>
<d></d>
<d></d>
<d></d>
<d></d>
<d></d>
<d></d>
<d></d>
<d></d>
<d></d>
<d></d>
<d></d>
<d></d>
<d></d>
<d></d>
<d></d>
<d></d>
<d></d>
<d></d>
<d></d>
<d></d>
<d></d>
<d></d>
<d></d>
<d></d>
<d></d>
<d></d>
<d></d>
<d></d>
<d></d>
<d></d>
<d></d>
<d></d>
<d></d>
<d></d>
<d></d>
<d></d>
<d></d>
<d></d>
<d></d>
<d></d>
<d></d>
<d></d>
<d></d>
<d></d>
<d></d>
<d></d>
<d></d>
<d></d>
<d></d>
<d></d>
<d></d>
<d></d>
<d></d>
<d></d>
<d></d>
<d></d>
<d></d>
<d></d>
<d></d>
<d></d>
<d></d>
<d></d>
<d></d>
<d></d>
<d></d>
<d></d>
<d></d>
<d></d>
<d></d>
<d></d>
<d></d>
<d></d>
<d></d>
<d></d>
<d></d>
<d></d>
<d></d>
<d></d>
<d></d>
<d></d>
<d></d>
<d></d>
<d></d>
<d></d>
<d></d>
<d></d>
<d></d>
<d></d>
<d></d>
<d></d>
<d></d>
<d></d>
<d></d>
<d></d>
<d></d>
<d></d>
<d></d>
<d></d>
<d></d>
<d></d>
<d></d>
<d></d>
<d></d>
<d></d>
<d></d>
<d></d>
<d></d>
<d></d>
<d></d>
<d></d>
<d></d>
<d></d>
<d></d>
<d></d>
<d></d>
<d></d>
<d></d>
<d></d>
<d></d>
<d></d>
<d></d>
<d></d>
<d></d>
<d></d>
<d></d>
<d></d>
<d></d>
<d></d>
<d></d>
<d>0.73001045</d>
<d>0.64693623</d>
<d>0.78725983</d>
<d>0.99501702</d>
<d>0.91316504</d>
<d>0.9312759</d>
<d>0.85191876</d>
<d>0.78109939</d>
<d>0.85600632</d>
<d>0.83042772</d>
<d>0.85741884</d>
<d>0.81710173</d>
<d>0.60274198</d>
<d>0.72289192</d>
<d>0.78662073</d>
<d>0.7873449</d>
<d>0.80527667</d>
<d>0.76625455</d>
<d>0.75365944</d>
<d>0.7673783</d>
<d>0.79605056</d>
<d>0.94525778</d>
<d>0.96723794</d>
<d>0.92196472</d>
<d>0.90483098</d>
<d>0.85627718</d>
<d>0.68694666</d>
<d>0.73263961</d>
<d>0.91023704</d>
<d>0.88454091</d>
<d>0.84686079</d>
<d>0.83520475</d>
<d>0.93623649</d>
<d>1</d>
<d>0.78168365</d>
<d>0.66036743</d>
</Subcolumn>
</YColumn>
<YColumn Width="81" Decimals="8" Subcolumns="1">
<Title></Title>
<Subcolumn>
<d></d>
<d></d>
<d></d>
<d></d>
<d></d>
<d></d>
<d></d>
<d></d>
<d></d>
<d></d>
<d></d>
<d></d>
<d></d>
<d></d>
<d></d>
<d></d>
<d></d>
<d></d>
<d></d>
<d></d>
<d></d>
<d></d>
<d></d>
<d></d>
<d></d>
<d></d>
<d></d>
<d></d>
<d></d>
<d></d>
<d></d>
<d></d>
<d></d>
<d></d>
<d></d>
<d></d>
<d></d>
<d></d>
<d></d>
<d></d>
<d></d>
<d></d>
<d></d>
<d></d>
<d></d>
<d></d>
<d></d>
<d></d>
<d></d>
<d></d>
<d></d>
<d></d>
<d></d>
<d></d>
<d></d>
<d></d>
<d></d>
<d></d>
<d></d>
<d></d>
<d></d>
<d></d>
<d></d>
<d></d>
<d></d>
<d></d>
<d></d>
<d></d>
<d></d>
<d></d>
<d></d>
<d></d>
<d></d>
<d></d>
<d></d>
<d></d>
<d></d>
<d></d>
<d></d>
<d></d>
<d></d>
<d></d>
<d></d>
<d></d>
<d></d>
<d></d>
<d></d>
<d></d>
<d></d>
<d></d>
<d></d>
<d></d>
<d></d>
<d></d>
<d></d>
<d></d>
<d></d>
<d></d>
<d></d>
<d></d>
<d></d>
<d></d>
<d></d>
<d></d>
<d></d>
<d></d>
<d></d>
<d></d>
<d></d>
<d></d>
<d></d>
<d></d>
<d></d>
<d></d>
<d></d>
<d></d>
<d></d>
<d></d>
<d></d>
<d></d>
<d></d>
<d></d>
<d></d>
<d></d>
<d></d>
<d></d>
<d></d>
<d></d>
<d></d>
<d></d>
<d></d>
<d></d>
<d></d>
<d></d>
<d></d>
<d></d>
<d></d>
<d></d>
<d></d>
<d></d>
<d></d>
<d></d>
<d></d>
<d></d>
<d></d>
<d></d>
<d></d>
<d></d>
<d></d>
<d></d>
<d></d>
<d></d>
<d></d>
<d></d>
<d></d>
<d></d>
<d></d>
<d></d>
<d></d>
<d></d>
<d></d>
<d></d>
<d></d>
<d></d>
<d></d>
<d></d>
<d></d>
<d></d>
<d></d>
<d></d>
<d></d>
<d></d>
<d></d>
<d></d>
<d></d>
<d></d>
<d></d>
<d></d>
<d></d>
<d></d>
<d></d>
<d></d>
<d></d>
<d></d>
<d></d>
<d></d>
<d></d>
<d></d>
<d></d>
<d></d>
<d></d>
<d></d>
<d></d>
<d></d>
<d></d>
<d></d>
<d></d>
<d></d>
<d></d>
<d></d>
<d></d>
<d></d>
<d></d>
<d></d>
<d></d>
<d></d>
<d></d>
<d></d>
<d></d>
<d></d>
<d></d>
<d></d>
<d></d>
<d></d>
<d></d>
<d></d>
<d></d>
<d></d>
<d></d>
<d></d>
<d></d>
<d></d>
<d></d>
<d></d>
<d></d>
<d></d>
<d></d>
<d></d>
<d></d>
<d></d>
<d></d>
<d></d>
<d></d>
<d></d>
<d></d>
<d></d>
<d></d>
<d></d>
<d></d>
<d></d>
<d></d>
<d></d>
<d></d>
<d></d>
<d></d>
<d></d>
<d></d>
<d></d>
<d></d>
<d></d>
<d></d>
<d></d>
<d></d>
<d></d>
<d></d>
<d></d>
<d></d>
<d></d>
<d></d>
<d></d>
<d></d>
<d></d>
<d></d>
<d></d>
<d></d>
<d></d>
<d></d>
<d></d>
<d></d>
<d></d>
<d></d>
<d></d>
<d></d>
<d></d>
<d></d>
<d></d>
<d></d>
<d></d>
<d></d>
<d></d>
<d></d>
<d></d>
<d></d>
<d></d>
<d></d>
<d></d>
<d></d>
<d></d>
<d></d>
<d></d>
<d></d>
<d></d>
<d></d>
<d></d>
<d></d>
<d></d>
<d></d>
<d></d>
<d></d>
<d></d>
<d></d>
<d></d>
<d></d>
<d></d>
<d></d>
<d></d>
<d></d>
<d></d>
<d></d>
<d></d>
<d></d>
<d></d>
<d></d>
<d></d>
<d></d>
<d></d>
<d></d>
<d></d>
<d></d>
<d></d>
<d></d>
<d></d>
<d></d>
<d></d>
<d></d>
<d></d>
<d></d>
<d></d>
<d></d>
<d></d>
<d></d>
<d></d>
<d></d>
<d></d>
<d></d>
<d></d>
<d></d>
<d></d>
<d></d>
<d></d>
<d></d>
<d></d>
<d></d>
<d></d>
<d></d>
<d></d>
<d></d>
<d></d>
<d></d>
<d></d>
<d></d>
<d></d>
<d></d>
<d>0.76064941</d>
<d>0.80610789</d>
<d>0.8140599</d>
<d>0.78545432</d>
<d>0.74383648</d>
<d>0.78568896</d>
<d>0.71526443</d>
<d>0.78357075</d>
<d>0.6566493</d>
<d>0.592533</d>
<d>0.62639866</d>
<d>0.74466288</d>
<d>0.76771959</d>
<d>0.9158696</d>
<d>0.85105324</d>
<d>0.65356803</d>
<d>0.69536893</d>
<d>0.90048772</d>
<d>0.97904862</d>
<d>1</d>
<d>0.89266334</d>
<d>0.79253352</d>
<d>0.73692747</d>
<d>0.9302665</d>
<d>0.91339684</d>
<d>0.94497797</d>
<d>0.89809747</d>
<d>0.97067761</d>
<d>0.95412897</d>
<d>0.93208174</d>
<d>0.92984879</d>
<d>0.91175693</d>
<d>0.61561936</d>
<d>0.71784677</d>
<d>0.81403927</d>
<d>0.80294926</d>
<d>0.70808209</d>
<d>0.82057183</d>
<d>0.75250015</d>
<d>0.85818014</d>
<d>0.79943351</d>
<d>0.91201607</d>
<d>0.86771791</d>
<d>0.84833037</d>
<d>0.85399012</d>
<d>0.80838339</d>
<d>0.97829829</d>
<d>0.97330765</d>
<d>0.79507331</d>
<d>0.69644287</d>
<d>0.72165259</d>
<d>0.79739523</d>
<d>0.88641957</d>
<d>0.86582144</d>
<d>0.80188306</d>
<d>0.5930487</d>
</Subcolumn>
</YColumn>
<YColumn Width="81" Decimals="8" Subcolumns="1">
<Title></Title>
<Subcolumn>
<d></d>
<d></d>
<d></d>
<d></d>
<d></d>
<d></d>
<d></d>
<d></d>
<d></d>
<d></d>
<d></d>
<d></d>
<d></d>
<d></d>
<d></d>
<d></d>
<d></d>
<d></d>
<d></d>
<d></d>
<d></d>
<d></d>
<d></d>
<d></d>
<d></d>
<d></d>
<d></d>
<d></d>
<d></d>
<d></d>
<d></d>
<d></d>
<d></d>
<d></d>
<d></d>
<d></d>
<d></d>
<d></d>
<d></d>
<d></d>
<d></d>
<d></d>
<d></d>
<d></d>
<d></d>
<d></d>
<d></d>
<d></d>
<d></d>
<d></d>
<d></d>
<d></d>
<d></d>
<d></d>
<d></d>
<d></d>
<d></d>
<d></d>
<d></d>
<d></d>
<d></d>
<d></d>
<d></d>
<d></d>
<d></d>
<d></d>
<d></d>
<d></d>
<d></d>
<d></d>
<d></d>
<d></d>
<d></d>
<d></d>
<d></d>
<d></d>
<d></d>
<d></d>
<d></d>
<d></d>
<d></d>
<d></d>
<d></d>
<d></d>
<d></d>
<d></d>
<d></d>
<d></d>
<d></d>
<d></d>
<d></d>
<d></d>
<d></d>
<d></d>
<d></d>
<d></d>
<d></d>
<d></d>
<d></d>
<d></d>
<d></d>
<d></d>
<d></d>
<d></d>
<d></d>
<d></d>
<d></d>
<d></d>
<d></d>
<d></d>
<d></d>
<d></d>
<d></d>
<d></d>
<d></d>
<d></d>
<d></d>
<d></d>
<d></d>
<d></d>
<d></d>
<d></d>
<d></d>
<d></d>
<d></d>
<d></d>
<d></d>
<d></d>
<d></d>
<d></d>
<d></d>
<d></d>
<d></d>
<d></d>
<d></d>
<d></d>
<d></d>
<d></d>
<d></d>
<d></d>
<d></d>
<d></d>
<d></d>
<d></d>
<d></d>
<d></d>
<d></d>
<d></d>
<d></d>
<d></d>
<d></d>
<d></d>
<d></d>
<d></d>
<d></d>
<d></d>
<d></d>
<d></d>
<d></d>
<d></d>
<d></d>
<d></d>
<d></d>
<d></d>
<d></d>
<d></d>
<d></d>
<d></d>
<d></d>
<d></d>
<d></d>
<d></d>
<d></d>
<d></d>
<d></d>
<d></d>
<d></d>
<d></d>
<d></d>
<d></d>
<d></d>
<d></d>
<d></d>
<d></d>
<d></d>
<d></d>
<d></d>
<d></d>
<d></d>
<d></d>
<d></d>
<d></d>
<d></d>
<d></d>
<d></d>
<d></d>
<d></d>
<d></d>
<d></d>
<d></d>
<d></d>
<d></d>
<d></d>
<d></d>
<d></d>
<d></d>
<d></d>
<d></d>
<d></d>
<d></d>
<d></d>
<d></d>
<d></d>
<d></d>
<d></d>
<d></d>
<d></d>
<d></d>
<d></d>
<d></d>
<d></d>
<d></d>
<d></d>
<d></d>
<d></d>
<d></d>
<d></d>
<d></d>
<d></d>
<d></d>
<d></d>
<d></d>
<d></d>
<d></d>
<d></d>
<d></d>
<d></d>
<d></d>
<d></d>
<d></d>
<d></d>
<d></d>
<d></d>
<d></d>
<d></d>
<d></d>
<d></d>
<d></d>
<d></d>
<d></d>
<d></d>
<d></d>
<d></d>
<d></d>
<d></d>
<d></d>
<d></d>
<d></d>
<d></d>
<d></d>
<d></d>
<d></d>
<d></d>
<d></d>
<d></d>
<d></d>
<d></d>
<d></d>
<d></d>
<d></d>
<d></d>
<d></d>
<d></d>
<d></d>
<d></d>
<d></d>
<d></d>
<d></d>
<d></d>
<d></d>
<d></d>
<d></d>
<d></d>
<d></d>
<d></d>
<d></d>
<d></d>
<d></d>
<d></d>
<d></d>
<d></d>
<d></d>
<d></d>
<d></d>
<d></d>
<d></d>
<d></d>
<d></d>
<d></d>
<d></d>
<d></d>
<d></d>
<d></d>
<d></d>
<d></d>
<d></d>
<d></d>
<d></d>
<d></d>
<d></d>
<d></d>
<d></d>
<d></d>
<d></d>
<d></d>
<d></d>
<d></d>
<d></d>
<d></d>
<d></d>
<d></d>
<d></d>
<d></d>
<d></d>
<d></d>
<d></d>
<d></d>
<d></d>
<d></d>
<d></d>
<d></d>
<d></d>
<d></d>
<d></d>
<d></d>
<d></d>
<d></d>
<d></d>
<d></d>
<d></d>
<d></d>
<d></d>
<d></d>
<d></d>
<d></d>
<d></d>
<d></d>
<d></d>
<d></d>
<d></d>
<d></d>
<d></d>
<d></d>
<d></d>
<d></d>
<d></d>
<d></d>
<d></d>
<d></d>
<d></d>
<d></d>
<d></d>
<d></d>
<d></d>
<d></d>
<d></d>
<d></d>
<d></d>
<d></d>
<d></d>
<d></d>
<d></d>
<d></d>
<d></d>
<d></d>
<d></d>
<d></d>
<d></d>
<d></d>
<d></d>
<d></d>
<d></d>
<d></d>
<d></d>
<d></d>
<d></d>
<d></d>
<d></d>
<d></d>
<d></d>
<d></d>
<d></d>
<d></d>
<d></d>
<d></d>
<d></d>
<d></d>
<d></d>
<d></d>
<d></d>
<d></d>
<d></d>
<d></d>
<d></d>
<d></d>
<d></d>
<d></d>
<d></d>
<d></d>
<d>0.66813761</d>
<d>0.7006652</d>
<d>0.62182638</d>
<d>0.60248344</d>
<d>0.75279779</d>
<d>1</d>
<d>0.96537363</d>
<d>0.83684963</d>
<d>0.75954571</d>
<d>0.58988374</d>
<d>0.46727704</d>
<d>0.55280762</d>
<d>0.56190467</d>
<d>0.70753479</d>
<d>0.89773533</d>
<d>0.79064838</d>
<d>0.74188741</d>
<d>0.77246596</d>
<d>0.95441879</d>
<d>0.98370813</d>
<d>0.95749092</d>
<d>0.78690941</d>
<d>0.53885552</d>
<d>0.49655234</d>
<d>0.45519208</d>
<d>0.61950298</d>
<d>0.5771647</d>
<d>0.52356741</d>
<d>0.45114895</d>
<d>0.477186</d>
<d>0.63589313</d>
<d>0.78401043</d>
<d>0.84375899</d>
<d>0.82226345</d>
<d>0.9949297</d>
<d>0.74771111</d>
<d>0.49247878</d>
<d>0.60738294</d>
<d>0.6090395</d>
<d>0.57541455</d>
<d>0.55777263</d>
<d>0.70803784</d>
<d>0.76298986</d>
<d>0.50855774</d>
<d>0.47952343</d>
<d>0.52314391</d>
<d>0.37436446</d>
</Subcolumn>
</YColumn>
<YColumn Width="81" Decimals="8" Subcolumns="1">
<Title></Title>
<Subcolumn>
<d></d>
<d></d>
<d></d>
<d></d>
<d></d>
<d></d>
<d></d>
<d></d>
<d></d>
<d></d>
<d></d>
<d></d>
<d></d>
<d></d>
<d></d>
<d></d>
<d></d>
<d></d>
<d></d>
<d></d>
<d></d>
<d></d>
<d></d>
<d></d>
<d></d>
<d></d>
<d></d>
<d></d>
<d></d>
<d></d>
<d></d>
<d></d>
<d></d>
<d></d>
<d></d>
<d></d>
<d></d>
<d></d>
<d></d>
<d></d>
<d></d>
<d></d>
<d></d>
<d></d>
<d></d>
<d></d>
<d></d>
<d></d>
<d></d>
<d></d>
<d></d>
<d></d>
<d></d>
<d></d>
<d></d>
<d></d>
<d></d>
<d></d>
<d></d>
<d></d>
<d></d>
<d></d>
<d></d>
<d></d>
<d></d>
<d></d>
<d></d>
<d></d>
<d></d>
<d></d>
<d></d>
<d></d>
<d></d>
<d></d>
<d></d>
<d></d>
<d></d>
<d></d>
<d></d>
<d></d>
<d></d>
<d></d>
<d></d>
<d></d>
<d></d>
<d></d>
<d></d>
<d></d>
<d></d>
<d></d>
<d></d>
<d></d>
<d></d>
<d></d>
<d></d>
<d></d>
<d></d>
<d></d>
<d></d>
<d></d>
<d></d>
<d></d>
<d></d>
<d></d>
<d></d>
<d></d>
<d></d>
<d></d>
<d></d>
<d></d>
<d></d>
<d></d>
<d></d>
<d></d>
<d></d>
<d></d>
<d></d>
<d></d>
<d></d>
<d></d>
<d></d>
<d></d>
<d></d>
<d></d>
<d></d>
<d></d>
<d></d>
<d></d>
<d></d>
<d></d>
<d></d>
<d></d>
<d></d>
<d></d>
<d></d>
<d></d>
<d></d>
<d></d>
<d></d>
<d></d>
<d></d>
<d></d>
<d></d>
<d></d>
<d></d>
<d></d>
<d></d>
<d></d>
<d></d>
<d></d>
<d></d>
<d></d>
<d></d>
<d></d>
<d></d>
<d></d>
<d></d>
<d></d>
<d></d>
<d></d>
<d></d>
<d></d>
<d></d>
<d></d>
<d></d>
<d></d>
<d></d>
<d></d>
<d></d>
<d></d>
<d></d>
<d></d>
<d></d>
<d></d>
<d></d>
<d></d>
<d></d>
<d></d>
<d></d>
<d></d>
<d></d>
<d></d>
<d></d>
<d></d>
<d></d>
<d></d>
<d></d>
<d></d>
<d></d>
<d></d>
<d></d>
<d></d>
<d></d>
<d></d>
<d></d>
<d></d>
<d></d>
<d></d>
<d></d>
<d></d>
<d></d>
<d></d>
<d></d>
<d></d>
<d></d>
<d></d>
<d></d>
<d></d>
<d></d>
<d></d>
<d></d>
<d></d>
<d></d>
<d></d>
<d></d>
<d></d>
<d></d>
<d></d>
<d></d>
<d></d>
<d></d>
<d></d>
<d></d>
<d></d>
<d></d>
<d></d>
<d></d>
<d></d>
<d></d>
<d></d>
<d></d>
<d></d>
<d></d>
<d></d>
<d></d>
<d></d>
<d></d>
<d></d>
<d></d>
<d></d>
<d></d>
<d></d>
<d></d>
<d></d>
<d></d>
<d></d>
<d></d>
<d></d>
<d></d>
<d></d>
<d></d>
<d></d>
<d></d>
<d></d>
<d></d>
<d></d>
<d></d>
<d></d>
<d></d>
<d></d>
<d></d>
<d></d>
<d></d>
<d></d>
<d></d>
<d></d>
<d></d>
<d></d>
<d></d>
<d></d>
<d></d>
<d></d>
<d></d>
<d></d>
<d></d>
<d></d>
<d></d>
<d></d>
<d></d>
<d></d>
<d></d>
<d></d>
<d></d>
<d></d>
<d></d>
<d></d>
<d></d>
<d></d>
<d></d>
<d></d>
<d></d>
<d></d>
<d></d>
<d></d>
<d></d>
<d></d>
<d></d>
<d></d>
<d></d>
<d></d>
<d></d>
<d></d>
<d></d>
<d></d>
<d></d>
<d></d>
<d></d>
<d></d>
<d></d>
<d></d>
<d></d>
<d></d>
<d></d>
<d></d>
<d></d>
<d></d>
<d></d>
<d></d>
<d></d>
<d></d>
<d></d>
<d></d>
<d></d>
<d></d>
<d></d>
<d></d>
<d></d>
<d></d>
<d></d>
<d></d>
<d></d>
<d></d>
<d></d>
<d></d>
<d></d>
<d></d>
<d></d>
<d></d>
<d></d>
<d></d>
<d></d>
<d></d>
<d></d>
<d></d>
<d></d>
<d></d>
<d></d>
<d></d>
<d></d>
<d></d>
<d></d>
<d></d>
<d></d>
<d></d>
<d></d>
<d></d>
<d></d>
<d></d>
<d></d>
<d></d>
<d></d>
<d></d>
<d></d>
<d></d>
<d></d>
<d></d>
<d></d>
<d></d>
<d></d>
<d></d>
<d></d>
<d></d>
<d></d>
<d></d>
<d></d>
<d></d>
<d></d>
<d></d>
<d></d>
<d></d>
<d></d>
<d></d>
<d></d>
<d></d>
<d></d>
<d></d>
<d></d>
<d></d>
<d></d>
<d></d>
<d></d>
<d></d>
<d></d>
<d></d>
<d></d>
<d></d>
<d></d>
<d></d>
<d></d>
<d></d>
<d></d>
<d></d>
<d></d>
<d></d>
<d></d>
<d></d>
<d></d>
<d></d>
<d></d>
<d></d>
<d></d>
<d></d>
<d></d>
<d></d>
<d></d>
<d></d>
<d></d>
<d></d>
<d></d>
<d></d>
<d></d>
<d></d>
<d></d>
<d></d>
<d></d>
<d></d>
<d></d>
<d></d>
<d></d>
<d></d>
<d></d>
<d></d>
<d></d>
<d></d>
<d></d>
<d></d>
<d></d>
<d></d>
<d></d>
<d></d>
<d></d>
<d></d>
<d></d>
<d></d>
<d></d>
<d></d>
<d></d>
<d></d>
<d></d>
<d></d>
<d></d>
<d></d>
<d></d>
<d></d>
<d></d>
<d></d>
<d>0.80009712</d>
<d>0.86969177</d>
<d>0.9089655</d>
<d>0.82888958</d>
<d>0.69274615</d>
<d>0.7308694</d>
<d>0.62038979</d>
<d>0.7640955</d>
<d>0.87893151</d>
<d>0.75695533</d>
<d>0.64506864</d>
<d>0.75701878</d>
<d>0.72374026</d>
<d>0.57993522</d>
<d>0.55015229</d>
<d>0.56113846</d>
<d>0.54020902</d>
<d>0.48971185</d>
<d>0.55095515</d>
<d>0.61205222</d>
<d>0.69540027</d>
<d>0.8382314</d>
<d>0.98116461</d>
<d>1</d>
<d>0.77938839</d>
<d>0.6938387</d>
<d>0.69914417</d>
<d>0.67807127</d>
<d>0.52137363</d>
<d>0.51206215</d>
<d>0.38799744</d>
<d>0.71585517</d>
<d>0.62000353</d>
<d>0.56223376</d>
<d>0.63121869</d>
<d>0.66126095</d>
<d>0.59997627</d>
<d>0.53477388</d>
<d>0.75527512</d>
<d>0.78822809</d>
<d>0.57289437</d>
<d>0.38734357</d>
<d>0.5564372</d>
<d>0.70413788</d>
<d>0.5570552</d>
<d>0.62868596</d>
<d>0.7290678</d>
<d>0.67807955</d>
<d>0.711645</d>
<d>0.85039839</d>
<d>0.75534961</d>
<d>0.74335092</d>
<d>0.57944688</d>
<d>0.67016686</d>
<d>0.90256473</d>
<d>0.78379996</d>
<d>0.69486779</d>
<d>0.72168484</d>
<d>0.79127398</d>
<d>0.61616582</d>
</Subcolumn>
</YColumn>
<YColumn Width="81" Decimals="8" Subcolumns="1">
<Title></Title>
<Subcolumn>
<d></d>
<d></d>
<d></d>
<d></d>
<d></d>
<d></d>
<d></d>
<d></d>
<d></d>
<d></d>
<d></d>
<d></d>
<d></d>
<d></d>
<d></d>
<d></d>
<d></d>
<d></d>
<d></d>
<d></d>
<d></d>
<d></d>
<d></d>
<d></d>
<d></d>
<d></d>
<d></d>
<d></d>
<d></d>
<d></d>
<d></d>
<d></d>
<d></d>
<d></d>
<d></d>
<d></d>
<d></d>
<d></d>
<d></d>
<d></d>
<d></d>
<d></d>
<d></d>
<d></d>
<d></d>
<d></d>
<d></d>
<d></d>
<d></d>
<d></d>
<d></d>
<d></d>
<d></d>
<d></d>
<d></d>
<d></d>
<d></d>
<d></d>
<d></d>
<d></d>
<d></d>
<d></d>
<d></d>
<d></d>
<d></d>
<d></d>
<d></d>
<d></d>
<d></d>
<d></d>
<d></d>
<d></d>
<d></d>
<d></d>
<d></d>
<d></d>
<d></d>
<d></d>
<d></d>
<d></d>
<d></d>
<d></d>
<d></d>
<d></d>
<d></d>
<d></d>
<d></d>
<d></d>
<d></d>
<d></d>
<d></d>
<d></d>
<d></d>
<d></d>
<d></d>
<d></d>
<d></d>
<d></d>
<d></d>
<d></d>
<d></d>
<d></d>
<d></d>
<d></d>
<d></d>
<d></d>
<d></d>
<d></d>
<d></d>
<d></d>
<d></d>
<d></d>
<d></d>
<d></d>
<d></d>
<d></d>
<d></d>
<d></d>
<d></d>
<d></d>
<d></d>
<d></d>
<d></d>
<d></d>
<d></d>
<d></d>
<d></d>
<d></d>
<d></d>
<d></d>
<d></d>
<d></d>
<d></d>
<d></d>
<d></d>
<d></d>
<d></d>
<d></d>
<d></d>
<d></d>
<d></d>
<d></d>
<d></d>
<d></d>
<d></d>
<d></d>
<d></d>
<d></d>
<d></d>
<d></d>
<d></d>
<d></d>
<d></d>
<d></d>
<d></d>
<d></d>
<d></d>
<d></d>
<d></d>
<d></d>
<d></d>
<d></d>
<d></d>
<d></d>
<d></d>
<d></d>
<d></d>
<d></d>
<d></d>
<d></d>
<d></d>
<d></d>
<d></d>
<d></d>
<d></d>
<d></d>
<d></d>
<d></d>
<d></d>
<d></d>
<d></d>
<d></d>
<d></d>
<d></d>
<d></d>
<d></d>
<d></d>
<d></d>
<d></d>
<d></d>
<d></d>
<d></d>
<d></d>
<d></d>
<d></d>
<d></d>
<d></d>
<d></d>
<d></d>
<d></d>
<d></d>
<d></d>
<d></d>
<d></d>
<d></d>
<d></d>
<d></d>
<d></d>
<d></d>
<d></d>
<d></d>
<d></d>
<d></d>
<d></d>
<d></d>
<d></d>
<d></d>
<d></d>
<d></d>
<d></d>
<d></d>
<d></d>
<d></d>
<d></d>
<d></d>
<d></d>
<d></d>
<d></d>
<d></d>
<d></d>
<d></d>
<d></d>
<d></d>
<d></d>
<d></d>
<d></d>
<d></d>
<d></d>
<d></d>
<d></d>
<d></d>
<d></d>
<d></d>
<d></d>
<d></d>
<d></d>
<d></d>
<d></d>
<d></d>
<d></d>
<d></d>
<d></d>
<d></d>
<d></d>
<d></d>
<d></d>
<d></d>
<d></d>
<d></d>
<d></d>
<d></d>
<d></d>
<d></d>
<d></d>
<d></d>
<d></d>
<d></d>
<d></d>
<d></d>
<d></d>
<d></d>
<d></d>
<d></d>
<d></d>
<d></d>
<d></d>
<d></d>
<d></d>
<d></d>
<d></d>
<d></d>
<d></d>
<d></d>
<d></d>
<d></d>
<d></d>
<d></d>
<d></d>
<d></d>
<d></d>
<d></d>
<d></d>
<d></d>
<d></d>
<d></d>
<d></d>
<d></d>
<d></d>
<d></d>
<d></d>
<d></d>
<d></d>
<d></d>
<d></d>
<d></d>
<d></d>
<d></d>
<d></d>
<d></d>
<d></d>
<d></d>
<d></d>
<d></d>
<d></d>
<d></d>
<d></d>
<d></d>
<d></d>
<d></d>
<d></d>
<d></d>
<d></d>
<d></d>
<d></d>
<d></d>
<d></d>
<d></d>
<d></d>
<d></d>
<d></d>
<d></d>
<d></d>
<d></d>
<d></d>
<d></d>
<d></d>
<d></d>
<d></d>
<d></d>
<d></d>
<d></d>
<d></d>
<d></d>
<d></d>
<d></d>
<d></d>
<d></d>
<d></d>
<d></d>
<d></d>
<d></d>
<d></d>
<d></d>
<d></d>
<d></d>
<d></d>
<d></d>
<d></d>
<d></d>
<d></d>
<d></d>
<d></d>
<d></d>
<d></d>
<d></d>
<d></d>
<d></d>
<d></d>
<d></d>
<d></d>
<d></d>
<d></d>
<d></d>
<d></d>
<d></d>
<d></d>
<d></d>
<d></d>
<d></d>
<d></d>
<d></d>
<d></d>
<d></d>
<d></d>
<d></d>
<d></d>
<d></d>
<d></d>
<d></d>
<d></d>
<d></d>
<d></d>
<d></d>
<d></d>
<d></d>
<d></d>
<d></d>
<d></d>
<d></d>
<d></d>
<d></d>
<d></d>
<d></d>
<d></d>
<d></d>
<d></d>
<d></d>
<d></d>
<d></d>
<d></d>
<d></d>
<d></d>
<d></d>
<d></d>
<d></d>
<d></d>
<d></d>
<d></d>
<d></d>
<d></d>
<d></d>
<d></d>
<d></d>
<d></d>
<d></d>
<d></d>
<d></d>
<d></d>
<d></d>
<d></d>
<d></d>
<d></d>
<d></d>
<d></d>
<d></d>
<d></d>
<d></d>
<d></d>
<d></d>
<d></d>
<d></d>
<d></d>
<d></d>
<d></d>
<d></d>
<d></d>
<d></d>
<d></d>
<d></d>
<d></d>
<d></d>
<d></d>
<d></d>
<d></d>
<d></d>
<d></d>
<d></d>
<d></d>
<d></d>
<d></d>
<d></d>
<d></d>
<d></d>
<d></d>
<d></d>
<d></d>
<d></d>
<d></d>
<d></d>
<d></d>
<d></d>
<d></d>
<d></d>
<d></d>
<d></d>
<d></d>
<d></d>
<d></d>
<d></d>
<d></d>
<d></d>
<d></d>
<d></d>
<d></d>
<d></d>
<d></d>
<d></d>
<d></d>
<d></d>
<d></d>
<d></d>
<d></d>
<d></d>
<d></d>
<d></d>
<d></d>
<d></d>
<d></d>
<d></d>
<d></d>
<d></d>
<d></d>
<d></d>
<d></d>
<d></d>
<d></d>
<d></d>
<d></d>
<d></d>
<d></d>
<d></d>
<d></d>
<d></d>
<d></d>
<d></d>
<d></d>
<d>0.5663797</d>
<d>0.89524493</d>
<d>0.66722046</d>
<d>0.56479698</d>
<d>0.6809709</d>
<d>0.78256054</d>
<d>0.66191537</d>
<d>0.50313082</d>
<d>0.52744739</d>
<d>0.80177025</d>
<d>0.81513052</d>
<d>0.78940429</d>
<d>0.61078072</d>
<d>0.87813397</d>
<d>0.65067903</d>
<d>0.53543964</d>
<d>0.39356781</d>
<d>0.37172758</d>
<d>0.38931997</d>
<d>0.4328431</d>
<d>0.45996954</d>
<d>0.72971102</d>
<d>0.68027237</d>
<d>0.67915219</d>
<d>0.51775915</d>
<d>0.6308463</d>
<d>1</d>
<d>0.97158033</d>
<d>0.74163331</d>
<d>0.53641507</d>
<d>0.65132092</d>
<d>0.80559331</d>
<d>0.93040767</d>
<d>0.87711134</d>
<d>0.79920266</d>
<d>0.71005764</d>
<d>0.53698459</d>
<d>0.58553277</d>
<d>0.50078349</d>
<d>0.37217125</d>
<d>0.68803806</d>
<d>0.44837134</d>
<d>0.35892111</d>
<d>0.54332175</d>
<d>0.5711782</d>
<d>0.67813271</d>
<d>0.73775361</d>
<d>0.79410525</d>
<d>0.84863817</d>
<d>0.86723116</d>
<d>0.75563548</d>
<d>0.64827506</d>
<d>0.76095945</d>
<d>0.89860859</d>
<d>0.74736319</d>
<d>0.83266626</d>
<d>0.90564743</d>
<d>0.69024379</d>
<d>0.47241731</d>
<d>0.44051755</d>
</Subcolumn>
</YColumn>
</Table>
<Table ID="Table11" XFormat="none" TableType="OneWay" EVFormat="AsteriskAfterNumber">
<Title>Copy of 5-6 hpf</Title>
<RowTitlesColumn Width="84">
<Subcolumn></Subcolumn>
</RowTitlesColumn>
<YColumn Width="81" Decimals="8" Subcolumns="1">
<Title>Basal</Title>
<Subcolumn>
<d>0.4586085</d>
<d>0.6604827</d>
<d>0.59097278</d>
<d>0.83803739</d>
<d>0.79916853</d>
<d>0.99218767</d>
<d>0.92301175</d>
<d>0.64888716</d>
<d>0.62337565</d>
<d>0.60415151</d>
<d>0.75277058</d>
<d>0.82251912</d>
<d>0.84286685</d>
<d>0.99012815</d>
<d>0.78767103</d>
<d>0.78145731</d>
<d>0.84455256</d>
<d>0.67959185</d>
<d>0.66528852</d>
<d>0.70486421</d>
<d>0.74556204</d>
<d>0.91845042</d>
<d>0.62333087</d>
<d>0.71113571</d>
<d>1</d>
<d>0.65862205</d>
<d>0.81555405</d>
<d>0.88306852</d>
<d>0.83887031</d>
<d>0.81207597</d>
<d>0.89368121</d>
<d>0.94979849</d>
<d>0.60577463</d>
<d>0.7449083</d>
<d>0.85505089</d>
<d>0.65438326</d>
<d>0.71848059</d>
<d>0.73001045</d>
<d>0.64693623</d>
<d>0.78725983</d>
<d>0.99501702</d>
<d>0.76064941</d>
<d>0.80610789</d>
<d>0.8140599</d>
<d>0.78545432</d>
<d>0.74383648</d>
<d>0.78568896</d>
<d>0.66813761</d>
<d>0.7006652</d>
<d>0.62182638</d>
<d>0.60248344</d>
<d>0.75279779</d>
<d>0.80009712</d>
<d>0.86969177</d>
<d>0.9089655</d>
<d>0.82888958</d>
<d>0.69274615</d>
<d>0.7308694</d>
<d>0.5663797</d>
<d>0.89524493</d>
<d>0.66722046</d>
<d>0.56479698</d>
<d>0.6809709</d>
<d>0.78256054</d>
</Subcolumn>
</YColumn>
<YColumn Width="81" Decimals="8" Subcolumns="1">
<Title>Apical</Title>
<Subcolumn>
<d>0.97557459</d>
<d>0.63391752</d>
<d>0.52528349</d>
<d>0.53699248</d>
<d>0.65995319</d>
<d>0.6774515</d>
<d>0.76158137</d>
<d>0.82906013</d>
<d>0.66430061</d>
<d>0.32585319</d>
<d>0.61459859</d>
<d>0.41161645</d>
<d>0.59499879</d>
<d>0.66290312</d>
<d>0.7116243</d>
<d>0.80340768</d>
<d>0.48107811</d>
<d>1</d>
<d>0.84027092</d>
<d>0.70245579</d>
<d>0.62012262</d>
<d>0.76025786</d>
<d>0.68405011</d>
<d>0.47906682</d>
<d>0.56196463</d>
<d>0.89011161</d>
<d>0.72242352</d>
<d>0.92806445</d>
<d>0.79501144</d>
<d>0.54488656</d>
<d>0.56908378</d>
<d>0.63372774</d>
<d>0.95267051</d>
<d>0.96423942</d>
<d>0.9892964</d>
<d>0.8375673</d>
<d>0.75021801</d>
<d>0.84548304</d>
<d>0.557437</d>
<d>0.49469788</d>
<d>0.75427868</d>
<d>0.86439257</d>
<d>0.54116398</d>
<d>0.93623649</d>
<d>1</d>
<d>0.78168365</d>
<d>0.66036743</d>
<d>0.72165259</d>
<d>0.79739523</d>
<d>0.88641957</d>
<d>0.86582144</d>
<d>0.80188306</d>
<d>0.70803784</d>
<d>0.76298986</d>
<d>0.50855774</d>
<d>0.47952343</d>
<d>0.52314391</d>
<d>0.90256473</d>
<d>0.78379996</d>
<d>0.69486779</d>
<d>0.72168484</d>
<d>0.79127398</d>
<d>0.61616582</d>
<d>0.89860859</d>
<d>0.74736319</d>
<d>0.83266626</d>
<d>0.90564743</d>
<d>0.69024379</d>
</Subcolumn>
</YColumn>
</Table>
<Table ID="Table15" XFormat="numbers" YFormat="replicates" Replicates="1" TableType="XY" EVFormat="AsteriskAfterNumber">
<Title>8-9 hpf</Title>
<RowTitlesColumn Width="32">
<Subcolumn></Subcolumn>
</RowTitlesColumn>
<XColumn Width="77" Subcolumns="1" Decimals="8">
<Title></Title>
<Subcolumn>
<d>0</d>
<d>0.04347792</d>
<d>0.08695584</d>
<d>0.13043376</d>
<d>0.17391168</d>
<d>0.21739221</d>
<d>0.26087013</d>
<d>0.30434805</d>
<d>0.34782597</d>
<d>0.39130389</d>
<d>0.43478181</d>
<d>0.47825974</d>
<d>0.52173766</d>
<d>0.56521558</d>
<d>0.60869611</d>
<d>0.65217403</d>
<d>0.69565195</d>
<d>0.73912987</d>
<d>0.78260779</d>
<d>0.82608571</d>
<d>0.86956363</d>
<d>0.91304155</d>
<d>0.95652208</d>
<d>1</d>
<d>0</d>
<d>0.03225781</d>
<d>0.06451563</d>
<d>0.09677344</d>
<d>0.12903126</d>
<d>0.16129101</d>
<d>0.19354882</d>
<d>0.22580664</d>
<d>0.25806445</d>
<d>0.29032227</d>
<d>0.32258008</d>
<d>0.3548379</d>
<d>0.38709571</d>
<d>0.41935353</d>
<d>0.45161328</d>
<d>0.48387109</d>
<d>0.51612891</d>
<d>0.54838672</d>
<d>0.58064454</d>
<d>0.61290235</d>
<d>0.64516017</d>
<d>0.67741798</d>
<d>0.70967773</d>
<d>0.74193555</d>
<d>0.77419336</d>
<d>0.80645118</d>
<d>0.83870899</d>
<d>0.87096681</d>
<d>0.90322462</d>
<d>0.93548244</d>
<d>0.96774025</d>
<d>1</d>
<d>0</d>
<d>0.02564087</d>
<d>0.05128174</d>
<d>0.0769226</d>
<d>0.10256347</d>
<d>0.12820588</d>
<d>0.15384675</d>
<d>0.17948761</d>
<d>0.20512848</d>
<d>0.23076935</d>
<d>0.25641022</d>
<d>0.28205108</d>
<d>0.30769195</d>
<d>0.33333282</d>
<d>0.35897523</d>
<d>0.38461609</d>
<d>0.41025696</d>
<d>0.43589783</d>
<d>0.4615387</d>
<d>0.48717957</d>
<d>0.51282043</d>
<d>0.5384613</d>
<d>0.56410371</d>
<d>0.58974458</d>
<d>0.61538544</d>
<d>0.64102631</d>
<d>0.66666718</d>
<d>0.69230805</d>
<d>0.71794892</d>
<d>0.74358978</d>
<d>0.76923065</d>
<d>0.79487306</d>
<d>0.82051392</d>
<d>0.84615479</d>
<d>0.87179566</d>
<d>0.89743653</d>
<d>0.9230774</d>
<d>0.94871826</d>
<d>0.97435913</d>
<d>1</d>
<d>0</d>
<d>0.02564087</d>
<d>0.05128174</d>
<d>0.0769226</d>
<d>0.10256347</d>
<d>0.12820588</d>
<d>0.15384675</d>
<d>0.17948761</d>
<d>0.20512848</d>
<d>0.23076935</d>
<d>0.25641022</d>
<d>0.28205108</d>
<d>0.30769195</d>
<d>0.33333282</d>
<d>0.35897523</d>
<d>0.38461609</d>
<d>0.41025696</d>
<d>0.43589783</d>
<d>0.4615387</d>
<d>0.48717957</d>
<d>0.51282043</d>
<d>0.5384613</d>
<d>0.56410371</d>
<d>0.58974458</d>
<d>0.61538544</d>
<d>0.64102631</d>
<d>0.66666718</d>
<d>0.69230805</d>
<d>0.71794892</d>
<d>0.74358978</d>
<d>0.76923065</d>
<d>0.79487306</d>
<d>0.82051392</d>
<d>0.84615479</d>
<d>0.87179566</d>
<d>0.89743653</d>
<d>0.9230774</d>
<d>0.94871826</d>
<d>0.97435913</d>
<d>1</d>
<d>0</d>
<d>0.03448254</d>
<d>0.06896509</d>
<d>0.10344763</d>
<d>0.13793018</d>
<d>0.17241479</d>
<d>0.20689734</d>
<d>0.24137988</d>
<d>0.27586243</d>
<d>0.31034497</d>
<d>0.34482751</d>
<d>0.37931006</d>
<d>0.4137926</d>
<d>0.44827515</d>
<d>0.48275976</d>
<d>0.51724231</d>
<d>0.55172485</d>
<d>0.5862074</d>
<d>0.62068994</d>
<d>0.65517249</d>
<d>0.68965503</d>
<d>0.72413757</d>
<d>0.75862219</d>
<d>0.79310473</d>
<d>0.82758728</d>
<d>0.86206982</d>
<d>0.89655237</d>
<d>0.93103491</d>
<d>0.96551746</d>
<d>1</d>
</Subcolumn>
</XColumn>
<XAdvancedColumn Version="1" Width="77" Decimals="8" Subcolumns="1">
<Title></Title>
<Subcolumn>
<d>0</d>
<d>0.04347792</d>
<d>0.08695584</d>
<d>0.13043376</d>
<d>0.17391168</d>
<d>0.21739221</d>
<d>0.26087013</d>
<d>0.30434805</d>
<d>0.34782597</d>
<d>0.39130389</d>
<d>0.43478181</d>
<d>0.47825974</d>
<d>0.52173766</d>
<d>0.56521558</d>
<d>0.60869611</d>
<d>0.65217403</d>
<d>0.69565195</d>
<d>0.73912987</d>
<d>0.78260779</d>
<d>0.82608571</d>
<d>0.86956363</d>
<d>0.91304155</d>
<d>0.95652208</d>
<d>1</d>
<d>0</d>
<d>0.03225781</d>
<d>0.06451563</d>
<d>0.09677344</d>
<d>0.12903126</d>
<d>0.16129101</d>
<d>0.19354882</d>
<d>0.22580664</d>
<d>0.25806445</d>
<d>0.29032227</d>
<d>0.32258008</d>
<d>0.3548379</d>
<d>0.38709571</d>
<d>0.41935353</d>
<d>0.45161328</d>
<d>0.48387109</d>
<d>0.51612891</d>
<d>0.54838672</d>
<d>0.58064454</d>
<d>0.61290235</d>
<d>0.64516017</d>
<d>0.67741798</d>
<d>0.70967773</d>
<d>0.74193555</d>
<d>0.77419336</d>
<d>0.80645118</d>
<d>0.83870899</d>
<d>0.87096681</d>
<d>0.90322462</d>
<d>0.93548244</d>
<d>0.96774025</d>
<d>1</d>
<d>0</d>
<d>0.02564087</d>
<d>0.05128174</d>
<d>0.0769226</d>
<d>0.10256347</d>
<d>0.12820588</d>
<d>0.15384675</d>
<d>0.17948761</d>
<d>0.20512848</d>
<d>0.23076935</d>
<d>0.25641022</d>
<d>0.28205108</d>
<d>0.30769195</d>
<d>0.33333282</d>
<d>0.35897523</d>
<d>0.38461609</d>
<d>0.41025696</d>
<d>0.43589783</d>
<d>0.4615387</d>
<d>0.48717957</d>
<d>0.51282043</d>
<d>0.5384613</d>
<d>0.56410371</d>
<d>0.58974458</d>
<d>0.61538544</d>
<d>0.64102631</d>
<d>0.66666718</d>
<d>0.69230805</d>
<d>0.71794892</d>
<d>0.74358978</d>
<d>0.76923065</d>
<d>0.79487306</d>
<d>0.82051392</d>
<d>0.84615479</d>
<d>0.87179566</d>
<d>0.89743653</d>
<d>0.9230774</d>
<d>0.94871826</d>
<d>0.97435913</d>
<d>1</d>
<d>0</d>
<d>0.02564087</d>
<d>0.05128174</d>
<d>0.0769226</d>
<d>0.10256347</d>
<d>0.12820588</d>
<d>0.15384675</d>
<d>0.17948761</d>
<d>0.20512848</d>
<d>0.23076935</d>
<d>0.25641022</d>
<d>0.28205108</d>
<d>0.30769195</d>
<d>0.33333282</d>
<d>0.35897523</d>
<d>0.38461609</d>
<d>0.41025696</d>
<d>0.43589783</d>
<d>0.4615387</d>
<d>0.48717957</d>
<d>0.51282043</d>
<d>0.5384613</d>
<d>0.56410371</d>
<d>0.58974458</d>
<d>0.61538544</d>
<d>0.64102631</d>
<d>0.66666718</d>
<d>0.69230805</d>
<d>0.71794892</d>
<d>0.74358978</d>
<d>0.76923065</d>
<d>0.79487306</d>
<d>0.82051392</d>
<d>0.84615479</d>
<d>0.87179566</d>
<d>0.89743653</d>
<d>0.9230774</d>
<d>0.94871826</d>
<d>0.97435913</d>
<d>1</d>
<d>0</d>
<d>0.03448254</d>
<d>0.06896509</d>
<d>0.10344763</d>
<d>0.13793018</d>
<d>0.17241479</d>
<d>0.20689734</d>
<d>0.24137988</d>
<d>0.27586243</d>
<d>0.31034497</d>
<d>0.34482751</d>
<d>0.37931006</d>
<d>0.4137926</d>
<d>0.44827515</d>
<d>0.48275976</d>
<d>0.51724231</d>
<d>0.55172485</d>
<d>0.5862074</d>
<d>0.62068994</d>
<d>0.65517249</d>
<d>0.68965503</d>
<d>0.72413757</d>
<d>0.75862219</d>
<d>0.79310473</d>
<d>0.82758728</d>
<d>0.86206982</d>
<d>0.89655237</d>
<d>0.93103491</d>
<d>0.96551746</d>
<d>1</d>
</Subcolumn>
</XAdvancedColumn>
<YColumn Width="81" Decimals="8" Subcolumns="1">
<Title></Title>
<Subcolumn>
<d>0.80080223</d>
<d>0.69813385</d>
<d>0.81907336</d>
<d>0.67785929</d>
<d>0.59946375</d>
<d>0.88006006</d>
<d>0.73749035</d>
<d>0.91028314</d>
<d>0.889142</d>
<d>0.74846847</d>
<d>0.82542686</d>
<d>0.86797512</d>
<d>0.78817675</d>
<d>0.77690262</d>
<d>0.86473187</d>
<d>0.66615187</d>
<d>0.86494637</d>
<d>1</d>
<d>0.85245817</d>
<d>0.84959245</d>
<d>0.49306735</d>
<d>0.59189618</d>
<d>0.80196482</d>
<d>0.81510082</d>
</Subcolumn>
</YColumn>
<YColumn Width="81" Decimals="8" Subcolumns="1">
<Title></Title>
<Subcolumn>
<d></d>
<d></d>
<d></d>
<d></d>
<d></d>
<d></d>
<d></d>
<d></d>
<d></d>
<d></d>
<d></d>
<d></d>
<d></d>
<d></d>
<d></d>
<d></d>
<d></d>
<d></d>
<d></d>
<d></d>
<d></d>
<d></d>
<d></d>
<d></d>
<d>0.92654255</d>
<d>0.89340128</d>
<d>0.78577757</d>
<d>0.76782002</d>
<d>0.60078177</d>
<d>0.60469641</d>
<d>0.76221444</d>
<d>0.82850277</d>
<d>0.82464603</d>
<d>0.62928454</d>
<d>0.48117092</d>
<d>0.67869821</d>
<d>0.57252222</d>
<d>0.5663723</d>
<d>0.86995975</d>
<d>0.47694936</d>
<d>0.43784347</d>
<d>0.39975678</d>
<d>0.97511075</d>
<d>1</d>
<d>0.92491531</d>
<d>0.54178996</d>
<d>0.51545299</d>
<d>0.59596375</d>
<d>0.97348351</d>
<d>0.85417378</d>
<d>0.77751976</d>
<d>0.95010568</d>
<d>0.87056201</d>
<d>0.60180676</d>
<d>0.55576918</d>
<d>0.86863364</d>
</Subcolumn>
</YColumn>
<YColumn Width="81" Decimals="8" Subcolumns="1">
<Title></Title>
<Subcolumn>
<d></d>
<d></d>
<d></d>
<d></d>
<d></d>
<d></d>
<d></d>
<d></d>
<d></d>
<d></d>
<d></d>
<d></d>
<d></d>
<d></d>
<d></d>
<d></d>
<d></d>
<d></d>
<d></d>
<d></d>
<d></d>
<d></d>
<d></d>
<d></d>
<d></d>
<d></d>
<d></d>
<d></d>
<d></d>
<d></d>
<d></d>
<d></d>
<d></d>
<d></d>
<d></d>
<d></d>
<d></d>
<d></d>
<d></d>
<d></d>
<d></d>
<d></d>
<d></d>
<d></d>
<d></d>
<d></d>
<d></d>
<d></d>
<d></d>
<d></d>
<d></d>
<d></d>
<d></d>
<d></d>
<d></d>
<d></d>
<d>0.61041366</d>
<d>0.91401306</d>
<d>0.95765764</d>
<d>0.8804047</d>
<d>0.62198608</d>
<d>0.59593159</d>
<d>0.78709789</d>
<d>1</d>
<d>0.97745539</d>
<d>0.95234195</d>
<d>0.90582335</d>
<d>0.81381875</d>
<d>0.82863145</d>
<d>0.91562049</d>
<d>0.60793639</d>
<d>0.64111238</d>
<d>0.56643335</d>
<d>0.47830997</d>
<d>0.64412375</d>
<d>0.90304596</d>
<d>0.55349258</d>
<d>0.7837864</d>
<d>0.69368934</d>
<d>0.91739069</d>
<d>0.79582681</d>
<d>0.94237695</d>
<d>0.61606507</d>
<d>0.52764157</d>
<d>0.66642928</d>
<d>0.79923495</d>
<d>0.73592997</d>
<d>0.6787749</d>
<d>0.61302318</d>
<d>0.66760433</d>
<d>0.64017641</d>
<d>0.49948115</d>
<d>0.67362199</d>
<d>0.99705475</d>
<d>0.77866909</d>
<d>0.40694244</d>
</Subcolumn>
</YColumn>
<YColumn Width="81" Decimals="8" Subcolumns="1">
<Title></Title>
<Subcolumn>
<d></d>
<d></d>
<d></d>
<d></d>
<d></d>
<d></d>
<d></d>
<d></d>
<d></d>
<d></d>
<d></d>
<d></d>
<d></d>
<d></d>
<d></d>
<d></d>
<d></d>
<d></d>
<d></d>
<d></d>
<d></d>
<d></d>
<d></d>
<d></d>
<d></d>
<d></d>
<d></d>
<d></d>
<d></d>
<d></d>
<d></d>
<d></d>
<d></d>
<d></d>
<d></d>
<d></d>
<d></d>
<d></d>
<d></d>
<d></d>
<d></d>
<d></d>
<d></d>
<d></d>
<d></d>
<d></d>
<d></d>
<d></d>
<d></d>
<d></d>
<d></d>
<d></d>
<d></d>
<d></d>
<d></d>
<d></d>
<d></d>
<d></d>
<d></d>
<d></d>
<d></d>
<d></d>
<d></d>
<d></d>
<d></d>
<d></d>
<d></d>
<d></d>
<d></d>
<d></d>
<d></d>
<d></d>
<d></d>
<d></d>
<d></d>
<d></d>
<d></d>
<d></d>
<d></d>
<d></d>
<d></d>
<d></d>
<d></d>
<d></d>
<d></d>
<d></d>
<d></d>
<d></d>
<d></d>
<d></d>
<d></d>
<d></d>
<d></d>
<d></d>
<d></d>
<d></d>
<d>0.63176416</d>
<d>0.99994365</d>
<d>0.71166376</d>
<d>0.48395144</d>
<d>0.65657719</d>
<d>0.75055834</d>
<d>0.71070587</d>
<d>0.640544</d>
<d>0.63296793</d>
<d>0.67430079</d>
<d>0.94237783</d>
<d>0.85515316</d>
<d>0.61603832</d>
<d>0.76267288</d>
<d>0.85403135</d>
<d>0.93341871</d>
<d>0.81038316</d>
<d>0.81021412</d>
<d>0.92193423</d>
<d>0.88612335</d>
<d>0.82221596</d>
<d>0.89317693</d>
<d>0.84578937</d>
<d>0.57791722</d>
<d>0.62987911</d>
<d>0.56497285</d>
<d>0.78733736</d>
<d>0.90910255</d>
<d>0.76406618</d>
<d>0.76478332</d>
<d>1</d>
<d>0.8526278</d>
<d>0.81556705</d>
<d>0.57798381</d>
<d>0.80526585</d>
<d>0.93799816</d>
<d>0.79574326</d>
<d>0.61599221</d>
<d>0.67986887</d>
<d>0.85373937</d>
</Subcolumn>
</YColumn>
<YColumn Width="81" Decimals="8" Subcolumns="1">
<Title></Title>
<Subcolumn>
<d></d>
<d></d>
<d></d>
<d></d>
<d></d>
<d></d>
<d></d>
<d></d>
<d></d>
<d></d>
<d></d>
<d></d>
<d></d>
<d></d>
<d></d>
<d></d>
<d></d>
<d></d>
<d></d>
<d></d>
<d></d>
<d></d>
<d></d>
<d></d>
<d></d>
<d></d>
<d></d>
<d></d>
<d></d>
<d></d>
<d></d>
<d></d>
<d></d>
<d></d>
<d></d>
<d></d>
<d></d>
<d></d>
<d></d>
<d></d>
<d></d>
<d></d>
<d></d>
<d></d>
<d></d>
<d></d>
<d></d>
<d></d>
<d></d>
<d></d>
<d></d>
<d></d>
<d></d>
<d></d>
<d></d>
<d></d>
<d></d>
<d></d>
<d></d>
<d></d>
<d></d>
<d></d>
<d></d>
<d></d>
<d></d>
<d></d>
<d></d>
<d></d>
<d></d>
<d></d>
<d></d>
<d></d>
<d></d>
<d></d>
<d></d>
<d></d>
<d></d>
<d></d>
<d></d>
<d></d>
<d></d>
<d></d>
<d></d>
<d></d>
<d></d>
<d></d>
<d></d>
<d></d>
<d></d>
<d></d>
<d></d>
<d></d>
<d></d>
<d></d>
<d></d>
<d></d>
<d></d>
<d></d>
<d></d>
<d></d>
<d></d>
<d></d>
<d></d>
<d></d>
<d></d>
<d></d>
<d></d>
<d></d>
<d></d>
<d></d>
<d></d>
<d></d>
<d></d>
<d></d>
<d></d>
<d></d>
<d></d>
<d></d>
<d></d>
<d></d>
<d></d>
<d></d>
<d></d>
<d></d>
<d></d>
<d></d>
<d></d>
<d></d>
<d></d>
<d></d>
<d></d>
<d></d>
<d></d>
<d></d>
<d></d>
<d></d>
<d>0.63831048</d>
<d>0.69362465</d>
<d>0.46809587</d>
<d>0.64722403</d>
<d>0.63693812</d>
<d>0.53989668</d>
<d>0.72954785</d>
<d>0.69915515</d>
<d>0.89998131</d>
<d>1</d>
<d>0.85693638</d>
<d>0.78467052</d>
<d>0.7294977</d>
<d>0.45134478</d>
<d>0.74198578</d>
<d>0.7530012</d>
<d>0.64145644</d>
<d>0.7110642</d>
<d>0.6644493</d>
<d>0.58494773</d>
<d>0.85413694</d>
<d>0.81429268</d>
<d>0.75830374</d>
<d>0.61559575</d>
<d>0.61693164</d>
<d>0.63531042</d>
<d>0.82496615</d>
<d>0.55793807</d>
<d>0.57932604</d>
<d>0.71430135</d>
</Subcolumn>
</YColumn>
</Table>
<Table ID="Table16" XFormat="none" TableType="OneWay" EVFormat="AsteriskAfterNumber">
<Title>Copy of 8-9 hpf</Title>
<RowTitlesColumn Width="84">
<Subcolumn></Subcolumn>
</RowTitlesColumn>
<YColumn Width="81" Decimals="8" Subcolumns="1">
<Title>Basal</Title>
<Subcolumn>
<d>0.80080223</d>
<d>0.69813385</d>
<d>0.81907336</d>
<d>0.92654255</d>
<d>0.89340128</d>
<d>0.78577757</d>
<d>0.76782002</d>
<d>0.61041366</d>
<d>0.91401306</d>
<d>0.95765764</d>
<d>0.8804047</d>
<d>0.62198608</d>
<d>0.63176416</d>
<d>0.99994365</d>
<d>0.71166376</d>
<d>0.48395144</d>
<d>0.63831048</d>
<d>0.69362465</d>
<d>0.46809587</d>
</Subcolumn>
</YColumn>
<YColumn Width="81" Decimals="8" Subcolumns="1">
<Title>Apical</Title>
<Subcolumn>
<d>0.59189618</d>
<d>0.80196482</d>
<d>0.81510082</d>
<d>0.87056201</d>
<d>0.60180676</d>
<d>0.55576918</d>
<d>0.86863364</d>
<d>0.49948115</d>
<d>0.67362199</d>
<d>0.99705475</d>
<d>0.77866909</d>
<d>0.40694244</d>
<d>0.79574326</d>
<d>0.61599221</d>
<d>0.67986887</d>
<d>0.85373937</d>
<d>0.55793807</d>
<d>0.57932604</d>
<d>0.71430135</d>
</Subcolumn>
</YColumn>
</Table>

<!--Analyses, graphs and layouts as compressed binary. Don&apos;t edit this part of the file.-->

<Template dt:dt="bin.base64" xmlns:dt="urn:schemas-microsoft-com:datatypes">eF7sXQd8FMX+n0u9XNqFoigqKwoiQnpVIEdTkCIiRbARkgDBkMQk1KcSUR/YwS5Y
ULE9G/qsD9RYUf8WVFDsqM+CFZ/9PYX/fHd2buf2du82uTu4S+abz2R3p/7mN/P7
zezMzu8mDD/66GMmDi10tKQRQlY6VjriqKsiJ8bdTOZQHyWe+ADPCdr9JgchcfS5
mtT5xAmE0WSk0UtFXMuEwwgZSljuKDmRup9pCW56BREuIbZTiweaHZoDkrT7OMLi
p1KXSVgeEhISEhISErEBPpYbJiESEhISEhISMQRxPMf7O97x8c6eTNg7fQrR39sl
JCQkJCQkJCQkJCQkJCQkJCQkJCQkJMwRT4bR/0fGE7IqQb/ax+7du8lO4iDJmVid
J2RH3ITEUpKkPjm0J2cmzzKRfYeXQLYdqPkEwfVk0IEH3s+2BVanFjirUBQZpT6P
IvpnfaEiTf1QUMSBgwaVL5pXqyyobmyqqa8b3DsvO7e3Ul1XWV9VUzd7cO/Jk44e
WNq7fIhr0MEjjhs+adqEkUpDbU1TszJh8rCxo4crvQfm5AxtaKitzskZMWmEMmHs
6BMmKTSPnJyR43srvec0NzccmZOzcOHC7ArEyq6sn4eITTkTGusbqhubF4+lmQ2k
CbKrmqt602JY7j7kUN+qmsrmIa6UQadXLx5Cs9Aya2isqWvOnlAxu/ro+sZ5Fc3Z
7NJMKZ+AoOrGQTlIQRNqGZjn0FxTeXp1c3ZlY3VFc703TcqgpmYaPFuIPrd+Jos7
KEcLC5JlTXP1vKGNjRWL9Uwr8Ig7nSiLPOxUDGk1UqbWNFbXVjc1nTZsqkieReYa
gU3NFc3VR9dWzBYzRAmzqxuH5A7K4bcqvTleLubwWnj9TAsRajBh3Kj6xpol9XXN
FbUTq5s6SsNYVAspKdG1Q0ryB+WoN9a57fmWOK6xppoS3EwlrOO0g0mlRA7m+XLQ
PMM93xQnVFbUUjZ1nGYwVAhp1P6fF4VyMIUOQDWVHUwfmVTK2whRqY04wR1OFCwq
5m2NKBGJpvkzJ7FyGirolOy0mrpZ9adxnpm1xYRxEyaMmIC4w+urqsdXzKvWWeXl
j2lRFq1mt9kCZurfbmLDiS0XtBYCRUMLfedSAUkwayfLhhJaSmgqsf28VE5qrKhr
qlWHthNUWlSyY5rxNqokkLf3W2FSTf3sCn8aY4rtFnUQ6Klpqh9YsZd5bSzJR6UO
rZo7v6m5ugqeE6srvQoqlhrCmI29ChpyDcDlwEHqiFOaVyqOPdy7qMRnSBIbCU9m
xO/1fkB7cwfvCMYaGrLljTcwz2dyF8S7tCDXzLuotCCaewBlxWg6O8nWx+4RNfOq
67BU1DE6gJ0KGnINwOXAQazBy4rM+kFpoW+vid5+4DecdZT296uYQGR0jtM68ZPr
KqzGsQ7SPAFqaMg2AJ8DBzFBjMmR2pxPxoGsA3YFYxUN+fLmsxiULbxje6xuaKgy
VWcdovWtKicQurffXS1KGjph9BS2yaa3iEZmbm52fq7d5bLmxQ1Cm/o1joFhk4wN
5SU2UBn+tFqRGigXkVJrQvkU3EgpJ3RQjrpDOcSV1IIDXHEkWd1aZhjaWFNRq2+u
BsVGZKGB5cOMuLQ1n5XCBnGS5yz1SNluirPVu+0HE3KleqwMyCf8CYkQiz2BFP0J
B9P0J57fReqdZzchV5EtOKum+befWmmmRkJCQkJCYm8DY/Ear1m7F8iCOGlyRmJv
IM5Tps6vYQrhUPp/XEVd3cCpc2qa66oXK83VTc1K/SxleH3DYlxLB1ZW19bSGWQ/
w4eSmJsmxLGrb0jnBNjAeXSkOsvOImCMg/yPhe5+jAwgumFLEVmaM+Io77sE2muQ
mh5zedG0BXK2glM5k8Y4qA0pwo3BZH+V+nRUR0OGdkX4WvUbXPa2R3xi8RgixJRm
+Jrw+gJtMQSCb3dROkrgb0lokS7UdaWuG3XdqduHun2p60HdftShdj2pO4A6fJBc
ThTCSkTJandIQlpGM8Lg51Hzn1Qxc35tRaPSWN00v7a5SUjL3lSRRzf1Cj/+julR
6Z1YUXd6k9JQW99sVmRcN+8rJ8JYMpA9orqpsrGmoblmQbWC9RD6tl1TKZbshVN/
T2W6AlmomZtH5q+xtiLzXmgrMprMdmS0re3IYKntyOgtJpFdikL8I6NbiZFTlQCR
0Z62I6Oj2o6MHm07Mrq+7ciQEduR0dltR4bU2Y4M8bQdGXJsOzKE1nZkaAbbkaFC
bEeG0NqODKVkOzK0l+3IUHO2I0Mf2o4MxWk7MjSsSeSjyQiqUbr1iyOj+AghISER
84B4+ygBDVAC7cFpdJ5yGp0bJdnK4Yel0XrlPDmNsJkXrlCK2lwJ8drltqi5Xud9
SbldHQdVJUtUDaw6hN5BziK+bbOLZoCBcIKyoKJ2frUQEiJ2VrzV9aELWstp/rt3
7SbdUTCgk8AJ5CScMH8e3l0b1UnyUC0wVLR8vNnDSHCYkMCHJFMShmmBIcPxmkZC
nAkJvDE4CT7v9ZO1wJAxbKNGQrwJCbzfeEmorqqpqAtbExCy/JJVDceO/0TrCwkm
JODdAjCQELYmIMNuuqlb09OfaiQkmpAAKQQ4CSNqZs2qbqyuq6w+Uhla2Ty/TTt6
Zljf8xPPhfl3aCQkmZCgbSCakjCqvmp2ddPAsdVz5tEeokVsM34/+aw7LrtJIyHZ
S8Jd3kUOhPDInAT+zAUWsJeCyxdgL4Wom+ylkFQB9lJIqgB7KSRVgL0UkirAXgpJ
FWAvhaQKsJdCUgXYSyGpAuylkFQB9lLsaarKtE1hh51N4UK5KWwPYIP/prCDhGdT
OImIm8LitiZytoK+KWw3RbjBN4WxBcEBHwDhvpvCYiweQ4SY0gwddVMY1INiwKPS
KzeFzSPLTWEvnHJTWIBTbgoLcMpNYQkJiSgHxNtHCWiAEmgP5KZwYNfeTWHEiNim
8JJt72wdNOv1cpp/gE1hkYSIbAqTnas9jASrTWFLEobxLELFijUaCVabwiIJkdkU
fuzvGglWm8I+JIR7U/jq6RNnXvXeNq0vWG0Km5AQtiYgx+5YNGHxjvc0Eqw2hUUS
sBAT1k3htfMLz+i1cK1GgtWmsBUJYdkUnlEx+PkP/navRoLcFLabQlIF2EshqQLs
pZBUAfZSSKoAeykkVYC9FJIqwF4KSRVgL4WkCrCXQlIF2EshUsU3heNICulDgmwK
Fw0sVuY0zCL+u8IAdoWBCY01TfOUyvp5DfObq6sU+hJWvaiislnRFgiUfrnZ+Xml
ZYcPUBbOqamcozRXnF7dpNTUNdcrFZWV9fPrmptrqEfFvPq62SxJU7Yyvr65Wmme
U9GszKtvavYtOAoB9vvvCseR8OwKY+dI3xVOI/oeJnK2gr4rbDdFuMF3hUtQHQ2l
2hXhvrvCYiweQ4SY0gwddVeYL8cBHpVeuStsHlnuCnvhlLvCApxyV1iAU+4KS0hI
RDkg3j5KQAOUQHsgd4UDO7YrfHULU7DXkOu0cvAiCb8utLB/0EYZ7GB+HGgnjBF7
5EWQE3VtCxv+UfgOoZsMoE/hICU9KC1KffOc6kalobF+dmPFvCalql6pq2/mhab7
FNhEy6muU5CgWqmgjuZepQUNUGbOb1YW1s+vraIUNDVXV1TRt4KG+sbmdEp3RQMt
YFHNvApatC/1eYdnp6cP1Hbu+aAIdrjIv2lLXet5vAU+j3t2qHMwHoPjak/b9/+R
R4T2/+ua62Z+lPJQ/CvlNP8A+/8iCWHe/69j6wxr1nsYCVb7/5YkDNOitx8aCfc/
oJFgtf8vkhDm/X+NhOdu0Eiw2v/3ISG8+/91zYtWDq/pVvKV1hes9v9NSAi9CRjq
mpeMOvjUrJ5faiRY7f+LJGDNLYz7/3XN25ce+mBu681PMRKs9v+tSAjD/n9dszLx
wI2tv67VSJD7/3ZTSKoAeykkVYC9FJIqwF4KSRVgL4WkCrCXQlIF2EshqQLspZBU
AfZSSKoAeylEqvj+f7yd/f/SgWVB9v/FYjszwAf//f94Ep79f+Sn7/+LO9PI2Qr6
/r/dFOEG3/8/BtXRMEq7Itx3/1+MxWOIEFOaoaPu/4NCUAx41Ce5/28eWe7/e+GU
+/8CnHL/X4BT7v9LSEhEOSDePkpAA5RAeyD3/wO79p4KxzVCu8J0FuMZNHHXBcF2
hUUSwrwrrKGl2cNIsNoVtiRhGM8iVGxerJFgtSsskhDmXWENngqNBKtdYR8Swrsr
TEjd7ZXH/m9VsF1hExLC1gSk9a+jTz7z6c81Eqx2hUUSsBITxl1hQhpGft7w27mP
PMVIsNoVtiIhDLvChKz9/tG6vA/u00iQu8J2U0iqAHspJFWAvRSSKsBeCkkVYC+F
pAqwl0JSBdhLIakC7KWQVAH2UkiqAHspRKrKPM4WlkOK+vJgaQ1cRZzHJ+PODLCB
8yiV5GqtkEYdNoH4Dzsv1dzx1E3SrtJFnxtL2Lsz7gG+l4wrlr4+QvvS1lZuTlbF
C1hEn9c4Fjm+dSx2mPlpXqpIcwfp8TTFqUJ7qdojAFyRAxx6DsBT4E2e71ibiSSA
XNHbeJo0dUuIg9dRLbsBu4M8VKsU8SzyRtZC4ctz9CzWQzNbBukP3hrhHgt/uFcF
wcEkgdMjIoX5uNXVEoaf1J1CFIcrdoaAy4iHsDUVwJgVJ90IFCtipRbzcm+zPaI2
KEemh1WJ52VWJfjxpjHSAVhWCUXjCgcErpLxmYP3CA5eJU46HwCsSEd1bZHOAvck
6XwkiinSL9A4ri+XO7VBFL+3AS1SKgdRewAbgg+iOPgHZ1Ta0kWXMw6i+MCFXyHJ
n0BeaGtjEOVAk0+i/28TZqVmflxM+SdEnkXYzeODKDJWvHHbP4iCSp7G7iDK1Y/5
IMrNtPqHopa8PP9Q1BwUm4eKo5F/KHgEnhtDmc7lSguhXM9aDd7ISYTlSGc9eKM4
ZCOynelKf7Rl8IYPH0Y4mWZVwr3IroBVYkQFG0bMqoR7sypZDyOMdHFYMiNdHAGj
jHQuxDFIOu9EMUg6lAIQg6SLWjnGSOdDWUyRbj1RhQ1AfMqpf+4fcMLK6mn07owA
G8wnrHzSipGwVnPGCZJ00eWME1YRkGis3EHmxFUfoIr6Pexw+Eylqujzww7WIbio
wolzGog2m7DCVyH+qz5MOPUJK2AmkgBkEkLM09idsOLrcOTpWeThkYUJK76kNQ9F
GVzf+Yei3+uh3kBhwmodClVnFsp0L+cgQhELdHDdq/LboU9YjTPIdkxYkQUnhoNp
VH8Yiws0YUVcPpygCQCzKsFPHE6MZaSoVA6raKqobdOYYqwXH1/M6mU9pjD6+efW
7aMfIje0oaYyxArwlG2rgPWgiINxhSTowTiMlEcaz/CwkfOreOa8iGMUCz6dFmCD
9cgJB8ad4GBuJfHX1tJFjws2cvbDDW1HcakHOIy6Rw0Sa/TjMo2xTfRjIyd8k4UM
uHqBnAFtGTl5mgAj51Jx5IROQp7wBdR8VIXIaeUloi/PIkzJGscoHhcHguC8Y1SG
eoUXbpCcCsJoLbYK+KM4xeEZjXsc5mmN3z6K+0+I8xjit5Ar6HWF4041Pqo1I6FB
vf+GukmObsfi/gLqNsc/pvp3p/9GxA1Q/T+kbmdcmvf+zHh2v4w6t3O9X1kf02ur
c6eaz43UrU/Z7L1vcen3E1LZ/dvUuZOcap5PU5eb/rvq/yJ13ZLJsT+RRXG+YzW4
oxDfpoXNMztQiHU6hbQvLBAUwrjCYTdPhcRGWCAoJPbrnkV20KDPHeqR3dpqZWhd
Re3iJdVVVFAdw+tr58/D5+VOh2NBUzaJ93oNhRfmEIo4hyBZDodCwU9JpLLHkaqp
wPpGM2N/5eRgnzRK0/x58yoaF5OuzPuEmtl1NbPoNKquuXaxUlXDvvRuVvpNUAYp
udm5RYeXk8NY1OPqqgeilOaF9QObK2pqq6v0QnppubGDC9rJhZo6pVKrzoBhPIrh
YEEXhwNflbDPy5WZ1c0Lq6vrlHnqd/dNZH8tDfsMn+bM8yP7WIQM4yF6rt7v5k1C
DJ+zH8RilBVl5+b2UYaPRsacJ5XVpGcAfg8fXU4OcDi2yubuTM2tv1jwqQBtebX5
Afa64A/j24z+xncyYaMTO52M/2nkIDpJ6qOlySPdydG0rMnUZwnZl6wiR5CN5BA6
Zh5C4hwsZQ/HQaTYsT+ZQN1c6s5z9Ca3O3qR5x0KfZP8lrDDzBwoB6XjyifQ+GAF
Uy6osT6aP+qYR9h3YAg7mrA6Y6I2WYuHKdMSwg4e4+VpFXVHELbwuZG6QwjLCyM8
7vEGG+dgNUZePRysbIzTxQ52cjiLugnaPWicq92jDufR+96Enbe+nd73Ioy+5+m9
Qq/onvxtk78K8vbgkyvUEfVHPcI0ucqmTnEo3slViza5whw1N87tE18ET9sax9Kq
E614NtFC1dc6W9V8cD8jhd0fS507cYYa5zTqfo9bod4ryDCZBCwL8VvjWXzcj0pg
90XUrU3J9d5PcLF7vE+1JLZ6aWtJaxgd25OrQFCIdZ4KiY2w9kIh1nkqJHrCssj7
9P87xG8Tgo622uJQknesZatdiQ5HbnZeflk+QobqGh2jKx2C4hyO8fX4P8k77BGX
w5FXVFCcrwxQ8kryS0pJusNRkl9QSBKQV1FhbukApW5wXn4JAqhHaXEe81Bj0lG1
sKggj75v4rYgtzQftwPpfW5Zbm6p0lyPgbeE3pJufhRt7egVNB9AUWEgHAOoi2ql
ZDrc8Pd52Ph2kWJa3kha7hjqjicZVP9lkQbvMishi+jzBdStpoPXbdStp+/vL9I0
jxAcc8agxCEOoHzvBnqQD6AY6FA2ngdocVBOMWF1RthIwniAsDHaPQZNaFksk6K+
0NAoF4NmA2F5QOdiqRv+cHgFxxW0rCYsDwyUt2n3GCjXE2bsAwMlXpFBAxok0Kpm
AqUyh9hb1RSsC8kFzWAAG6wXNHl3ukFzfFFJuuh0wRY0xa1AEZgYLjIoOqMf7uCY
WmNAd2ELmvAVS+VbF9raZEQXNKFgkKeniT0jhr4VyG1AiKFsRs5rwumB0sGUupz4
L3eKtQZsb8lt9eoyfaThhp9ERrR9pOH56ptzyJe/bvBXLGPl+H6TuLnlXznEEjfn
GMz3traqIwIa1zv+W1cV0XhPMgLkiJMr434dM0XnXyX05eBV8tuvY7CqE0Y9ZKZP
cqwrxQttW6WsR7tESu5RxN5oZ2EUT458wQA2WI98fCVim+aMmla66HLBRr5AW3l2
Rz5MWDn0kQ++FwshXGFDzoBIjnx8IUjcytNHPqyCGUOZJuU14fRggw+aFFN048jH
43L16B35XvB6w6NZfVrrtxaF9RuPg63foIjfyUr1HutM7ni2zgT/bQ7mj/ibE3L9
8lEI1n6INz6JZ/GXUbcy3riJR8iJ1HkSWtQ4uG+l98Y4WLtqcc0Y/RPZ7PAduXFV
tFgcdtc1FGKdTiF7NiwQFGKdTiHtCwsEhVinU4h1WCAoxDpdFvkXweyIkPHz582s
bsSgyX6xirgdjnE1dTXz5s/DSkF+UR9lQnVjZXVdc01tNVY22DI/Bv0S/7CKRTzh
uGoaKcHhOKG5KlsZUb2ghg6/9XWIpPqMbGysV0tV43VxOMbWL6RklBVhqZ+kORyT
Gxp8nhGP7WVgRWRrjNOvz5egQqB80FKoD9D2+e4IwudnbCLYjaqrXnQulkcnO0fR
6zhVfUHanWQGfW7U1mFW0FTXainvpPO6R+iTbznID6XgijygCbCUj3keOlQeYfM4
qEnMy+CPeo3T4mOAgY7BFap+hhYHaRoJU9MobwVhNcB8GTTgHmr/TsJWWcBHPtll
tOs84ioa+YNWcbvAX0WL83dfPY39AEK2j9KSqIA/9HEDYfpY1c3a/gHu1wv3E7S9
AQySOw17CTxOi6bX1X2IBHYPvd5qotfVchOFcpMUvzgoa32SW+ppFXbzVIh1WCAo
xDqdQqzDAkEh1umy1BVEzB+wwBuPRdz84pISaK/c7MKCwjJ2h1VgdldcXKquLedl
5+bmsuXmoqLCQhaYV1SgRcvNKyguYovCRfklWnBRaZ56l5dPUyPtVnIOLRkG4PZG
6SZvzKKyBFO4wIvs44ACEFlppizZfDeZKqMs6npS14e6HG05upTeD6NurKY8p9L7
ClVxEXI6jeOvLJEfSsGVrw9mafcgBQaUubLEnizuUS8s36JMKK5SzV9dNNDu4TCL
Bx0ob6rmB2VZod1DWZ6upQO4ssRMF+A84soSaYIrS5+VAXvaEtqsgbBZrbjbqu6e
CvczNG2JexLvr9ngv1bQlh5BW2630JYrBW2Za6EtN0ttqcFungqxDgsEhVinU4h1
WCAoxDpdlvqBwwICfVXK9FVuSWFZLlM1haX5XlVTnKcprLJCTZ2VlhVofkUlxQVc
Y5V6NVZhbqGmsQpLi7TEuYVqkryCIq4vz6Nlt+y18s3W40SVCc5wsRd5yNEWlZlK
2O6di/SlLldTi0fS6wjqxmsqcxq9r9TC5gVVmXx+yeeHIAWyyVVmX+0e9crV7qG+
jtTuofpAKVeZ44muMqdpflCZldo9VOY8LR0QaN0xifgeqAtiRkmuJXKADdZriWgG
NHmt5rCWg5Uj4xqWdNHhMAsJtJY4ADe0tbGWqDW1Krp/0P/HOpJM/bQkXieu7yE+
W0uEr6L5wDGloj+3ZS2RpwmwltggriViqoM8/Q/FwRdfvKmhfmaUeHqEIlfUlZ+i
Ujnh0OdeIiWA7V00XdcjC67rOVCMGTtEHQwE2jtDvnw6yWZ95lWCn7jR5F8l8d0b
94wy830m63qh8+DerF68W3AYN8rQWED76PfbKGtfBXjKtlXAenBKJjYOtrERSx5s
azPABusRDA6M4wfblhF/rSld9LhgI1ig3bDrDBJr9OMyjfd80Y+NYPDdWwfbMFgg
T//9Lk4rpx21nkXYoqtxjOJx2/ntNYpT5ME2oiMcb70KaV9YICiEcYXDbp4KiY2w
QFBI7NddHmyLzZNOhe076SQPtnWq5tZfLPgvMtKWlwfbCHt5WkWi52Abf0dHe8Dx
yZVKA/HdfAlxciVutYRysA3xZ8S71XtUfXuyfrCNH3I7lrr1CTO8E7OViWxipi4O
pPtuCYlAnBOpWxTfosbH/e/aPbZ1djr1g238kBsmbP0S13tpW5+K7ZtYnlwFgkKs
81RIbIS1FwqxzlMh0ROWpU7ynyN+mwFBzn3lFxapGzuqaodXgBNfJfzAVyEG4BK+
/V5QWlqA012FRfimKDe7MD+3CM8Fpew5tyA/r1g77FVUUlTGD3sVlBbksbNeeYU0
ry4CEVs7VG3Mh0bUDgjH0Gh1ZC2FlNNy2bG1DDKNDi1ztM0yoJ5qqqXUXUaHJXZs
bR+yQd0Q20LCd2QN/nA4pQEeIGykdo/hcAzRj6xhQwzDH4aiOYTlB21ar11BExYL
cA9aLiP6kTV+fA1D4G2EcQhD4AZibzPNSWwcWdPWK+WRtTYAbLBequTdSR5Ziw0X
bKkS4g99ZrZUaffDff47KAC6C1uqhK9YKt+U0FYdI7pUifk08jQ/sqaYhLK5Nq8J
rxk4hMmyh/gvZIq1BmxvtpkdWUNmIENkRNtHGp6vvu2GfPmLBJgCGCsHBvNnvm3l
XzlQGZYja8aqIhonyQiQI06bjDtxiuZvrBIICV4l9PgwHVkzVooX2rZKWY92KcTG
kTVttJNH1toJsMF65ONrDNs0Z9S00kWXCzby9cMNbe1QRr6DvT7iyAffi4UQrrAh
Z0AkR77ehOVpfmQNE39jKNOkvCa8ZqAPmpSf3YAnH/l4XK4e5ZG1IFCIdTqF7Nmw
QFCIdTqFtC8sEBRinU4h1mGBoBDrdPLI2t6lX58vHUz0+RLqA7BZkD+s57sjCJ+f
dYYja1DtAHgEx1U0X+1BWdYqWpy/++pptirVOkpLogL+0LszhEMY7iBH1nC/M87/
wIR6qEI4hJErHMIw0+uI0yIcwlAsDmG0ykMYGuzmqRDrsEBQiHU6hViHBYJCrNNl
EXwGO5+6wiIsBWPttqBIOwORn1uqHRrD2q923gGHJdS7sqJ8zY+Gaqch8vNytbvc
gjxuyKwgn2aoehbS1LgrKMvOK2bL2ZhCnL23ijd5Zz6Y6OoSbIHoB1KXIjPN1CV7
2U2iqsr30Bpboymj1+HU6erTRWZqYbXE7AQG8kMpuHJ1mUWYugMpgQ6t4R6qq0y7
R92Ga/dwXKWiPKhU+EFdztTuoS5rtXQAV5eY6wLgERxXl1h8Dq4ufdYGpL40h0Ks
0ylkz4YFgkKs0ymkfWGBoBDrdAqxDgsEhVin0/VlQammsEpzS1QzjVT9lBWo+oXt
jWkKq4QdlM3NLikpLdZCC/I1NZVXWsLPjBXkFmq7ZwUluVqSwjJ2CLewiHoyfXku
YRs9e6V4s/W4g4mvwoSikArTSmFarzu6aCyUVTSwWJnTMItYnVXzyEVEDWCD+SIi
bx+09XWaMy5aSRddbiyxXkTku9dQKlhEZPJO5Ze2+bHxCXFr4hPjuF+56ldO/Txq
j0AH4Q7yrS7kLRqm5skWEQ8l7BQj7zU8J54qkr9WfARh8c3Pqg2wDEXVBlqGot9j
fmIeCs0D7WYeCj2YaxkKzZhnGYr2y7cMBX8KLEPBYZyKMg8F7zErM4ayCShaEEAo
eIzYVif30AdE2N5M1Ic8FIds1IQaAg15IgJtISJfPqfmZJpVCX5IzTtkwCoxosx3
2gJXCfdmVeLywWHcKkSfBqxIR3WjlHQIHBCDpEMbADFIOlQVEIOkQ48CMUh6ruYf
g6RjBAJikHQMj0AMko6xG4hB0jGxAGKQdMx6gJgi3fo1N5UShVL5lzTBXndZRY3e
nRFgg/nrLn/lxYx1reaMr1fSRZczvu7ycQFXtOfReKCtjdddyCWApacj44aTi+JG
mPpxcHnFR+Yc+usufHFFDnBcitGh4NryzQxPY/d1t4SwPP1f8OBbahmKMrjC8w9F
v7cOhQayDk0MGAr+WIei/axDoZitQ8Fh61C0iVkoGxJ4uyIUsdC2fEhQ1YJDf90V
+wDQjtddZMGJ4WCK3h9ted1FvnyUQ8cAzKoEP3GU868SqGy7oRpjvdAVcG9WL+uh
jtGPrgu0j36/z2PbVwGesm0VsB6r0yhpmH4E/BRWG8ClpZo2A2ywHtDhwLh4B3PY
dzIOItJFjzMO6CIg/f1wQ9sxlI9gsQ8l+rEBHb6PCiFcB0POgLYM6DxNgAHd5yPY
IwnL0/8zV04rQpkyYR8FQFMaBykeF99qwXkHKXuHqVGcIi3VEB3h2OpWSPvCAkEh
jCscdvNUSGyEBYJCYr/u0lJNbJouyW+f6RJpqaZTNbf+ZoEBGUM5bXlpqYawt6dV
JHos1WDaBaA9xMkVXqPxjHq0cXIF09qEXOs3uVK/ixQs1awVLNV4bFiq2SxYqmkQ
LNUQ4SfYWwVLNa2CpZq1mqUahbqVSYF/gv1E6lYIlmqc2vkjsMudwiaHuN+s3WOC
NyqRTfBAG0mTlmoYojWsvVCIdZ4KiZ6wLPIq/f8S8d8cyQxi3CWPfShvw7hLYVF+
iTJAKcwvysMInFeWW8R+mrykqLgE1lyKC5k1l5L8fPWXyYtV6y6qHZfC4hKM7Op9
QV4Bvy8tKsjVfpk8r7isFIOzYK6mw1XJfJBEFYFQBkk2kHWlg82BdFA6VB2AGAZS
vxL67KHlHk3dWJJBptNBpsa7lkrIGVRnnUPdKlrWDdTdRQeuVmJms4Z/lo8r3zY6
kOiD5KGEDX54xlcliINyMLjAH85D9M0DDJ64x8CIVZAMwuo7neg2a2oIywN69Qzt
CprO0e4xCmCARTrQBYMnuMdgeBdhgzAGw1bCygcCLV2m01i5xObSpTRa0waADdar
lrw/SaM1seEgr4FWLbG9CIUWyqolZl0c6C5s1RK+Yql8g0JbgIzoquVgwvI0N1oz
xCSUTbt5TRDKtAybduNcqioIDn3aLdYasL3xZma0BpmBDJERbR9qeL76Fhzy5e8U
YApgrByGOfiJW1j+lQOVYTFaY6wqovGeZATIEWdQxl05tCRgrBJftQ5cJb9dOQar
OmHYQ2Zmh2SMleKFtq1S1sNdBiUXZdga7qTVmnYCbLAe+uDAuG2aM6pa6aLLBRv6
wrFhV+71EYc++F4shHCNDTkDIjn0eQjL09xqzVCTUKZKeU0QyjQOU6VQsaogOPSh
j8fl+tE79L3g9YZHs/okrdYETqeQPRsWCAqxTqeQ9oUFgkKs0ynEOiwQFGKdTlqt
2bv06xMmqBAoH7QU6gOwaZA/rCe8IwifoKmnBzu41RoPYQCPRBWNMDyLmwL+Klqc
wPvqaSsrDNDHM4QfWieC5YW1wr1H2AHYbvFD6w2CFQa3YIVhvYleV8sVrDAQCysM
a6UVBg1281SIdVggKMQ6nUKswwJBIdbpsshC+h+v58WFzAxCYRG3blBcXKTZNMD6
L7srLShV74RfOi8pKtOi5eWV5bK73LxCGk81glBSwC3JlJSWqbYUSuDJ1rRbaMFn
7p3CTV6YRVUJlkCdBFKVIiPNVCV7002iqshN3f7UHUpdtrbsWkLvh1I3RlOdU+j9
DFVtETKXBDPAwJcHURLuQQr2P7mqPFS7R1yINsrkS8/wx/NQ7R5uDNENMEzR/KAq
Z2j3UJVztXQAV5XIAwCPRFWJNZDgqtJnYUDqSnMoxDqdQvZsWCAoxDqdQtoXFggK
sU6nEOuwQFCIdTpBV2omYwryizS7WsV53DQW9sa4uipTlZmorvL5r53nFZVoRrdy
qeIqZeqquNSbSzEzsFWcn12Ux3TlObTgs/ZO4WYLcUZlCSUhlaWVsrRecMwkzFpN
6cCygMf3PHLxUAP4YL54yNsHbS2t1cSGMy4e4kMxfoWMXYoH2tri4mELwcG7FnKb
qhSt/dBJ4IYTbel9EZN3tng4jDB9z8G0iZ4qktZqoPcQ37PIG1kLhS8mFuah6OzH
Woai30M3mYdC84DbxlA2kQM3AISCXugwq6Nw4KcI2zty+vCB4pCNyNhAw4eIQPtw
yJfPTTmZZlWCH1Lzxg1YJUaU+XZV4Crh3qxKvK9xGPfb0D8AK9LF/bYoI53PimOQ
dEgWEIOkQ+yBGCQdOgmIKdKtJ3Ru4muXIdjEjlXU6N0ZAT6YT+z45A7jyVrNGScS
0kWXM07sRKA91Y0E2tqY2KFdAcjSMY4Ecq0j0dSPg8vrSK8Pk3g2sYMvrsgBjksx
YsC1ZVeYp7E7sTuGsDz9p1/wxWoWC/V4Q5kS5DVBKHKFBrGafom1Btox/UIWXL9y
MNXmj7ZMv5Av1+tgBWBWJfiJet2/SqqqbrMlAmO90GVwb1Yva+XO6OdLj+2j3++b
p/ZVgKdsWwWsR6csYsMSgTZkSUsEbQbYYD2EwYFxJziYW0b81aZ00eMCDWGQ/n64
oe1o9mHTdQaRNfpxocY+tujHhjD4JgsZcB0MOQPaMoTxNAGGMJ8Pm8YTlqf/p0uc
VoSiH2cRttmDt1XjIMXjBjksh+REWiKI8x2sY+mwnEIYVzjs5qmQ2AgLBIXEft2l
JYLYPJpe0L6j6dISQadqbv3NAgMyhnLa8tISAWFvT6tI9FgiwLQLQHuIkyusVaL+
qEcbJ1fz1EjRY4kAVVmbOMFb7va07fwl2w+IcyJB/i1qfNzv1O7Bru1ONjnE/VrN
EgEmbLmJ6720taZKSwQM0RrWXijEOk+FRE9Ylnqe/Xnivx0Q7Nh+foH6NY6dY/t5
BcoApSC/lKQ4HHkFpcgJH/GUlOKMfl4ZO7NfXFJWpj+rZ/NLyor4Of3i3Hx+fj+v
qKhMO7JflF9WiBFRsELQoapjPjiiekAog2NbLRCkk9nqoMVQR3XV2dRdSstaTd3t
NNeNZG9bIMBgCDebsPygT+u0K2jCj0/iHtofX20gHehard2rgyBhHMIgiAGX8yXQ
kmUXYsMCAV+ylBYI2gCwwXq1kvcnaYEgNhzktb2rlXaPYU7w+jC9w1Yr4SuWyjcm
tIXHiK5Wwhd5mlsgmGgSyqbbvCYIRS+H1sJ0+xjiv5Yp1hqwveFmZoEAmYEMkRFt
H2p4vvrWG/Ll7xK8MYyVw+4S/MStK//KgcqwWCAwVhXReE8yAuSIMyfjbhxaEjBW
CSNW8Cqhx4fJAoGxUrzQtlXKerjrSmxYIODDnbRA0E6ADdZDH19n2KY5o6qVLrrc
nhj6TvD6iEMffC8WQrjGhpwBkRz6UD7yNLdAgDUvYyhTpbwmCEUvxyQdqhRLNcah
j8fl+lFaIAgChVinU8ieDQsEhVinU0j7wgJBIdbpFGIdFggKsU4nLRDsXfr1CRNU
CJQPWgr1Ado+4R1B+AStM1gggGoHwCNRRWO5HLSKmwH+KlqcwPvqabZpE/qpWtxv
j/M/AQv/FuFUrSKcqm010euI0yCcqnVbnKpdL0/VarCbp0KswwJBIdbpFGIdFggK
sU6XhUNZ6vwhr0wzAlBcqp1TLS7I40YAiku0u9KygkJ2V0ahhRblcysARYWaAYHc
Atyyk60lpdpx19J8dvA1Py+7pND3WO3eKN3klVlUlmAKFEogZSmy0kxZsndd/2O1
bImmlF6HUTdWU55T6X2FFnY6CfexWtxDcZVq9+qqgXYPh1k8P1Y7VfODsqzQ7qEs
T9fSAVxZYqYLgEeisoQmCa4sfZYGpLY0h0Ks0ylkz4YFgkKs0ymkfWGBoBDrdAqx
DgsEhVinM9GWucWaHioqKdMUDTbHNJWTV6Rps7KyEq7Xyrg2yyvK10yrUH2VW6Dp
q/xC9fQ/VWwleaqyyyvJzi9m2hLvW9jn2Rulmy3GGdUl1IRUl1bq0mzRsUsL82OK
sHBgZXVtLWHrh0dSaldpMcHkDO2qpe3UABv4+mFXdXtyQZIn9ez0nZmcR4tIviqs
6GKsS8SRKu0ZuJF9X6w9n+IUeWvWfTn0MMQX06CpuF8VLT1fiNvq0W6E1mOh3dRO
xmPuo3bJOK2jMIhLyGu9ryDcieClc4gpzcJhYl8XWLjuXh8APvuqq+G+2Flu9ZxG
nOoSX4KaFqtVcW3OYb3a5xPVHFw0p0TTHKZ5rJ55DvFqDklUsJzkNlXJQMzTArYu
w+bjvvlq11J/fiGsbTlxtD8nY0ojEOfeFj6/4riLDCD6LwYLAZa4kyjEv0cZYS9f
ppIZgueL2Pd6fOuAq72yxFoHL8t+vmyIYQieL2Ib64D49soScw5elv18xaEweL6I
LdaB18NeWSKClwXYyze0vsSdvbKisy/B2W/z6OxLPK69skQELwuwl29ofQlx7bd5
dPYlxLXf5tHUl/q0/J3ok2mOneUfb1y9aErhsHI8sbkHqzXjf652wg3YrMYR4TvP
CgyUzrFQrSFwvvp9uSXKeejftZKWa9cV2vVe9ft3zAHUhQwzsDrlDmUR+miMELsX
4Dsdcibji0GREfkCIw71eG81cEYYczVDuxjhDbXBCPQcM5gzwtiCnZYRonIDdpYf
1/Orh84ZP0bt9mxK7C8aq68DXvITDYctFjC0ixGREw1OAIdvj1if0LYewRlhhx3t
YkTkegSSiOi0jEhSn3RM80xW8bCFaARmRMR1RFtEw8gADnNG+H5+E2qPiDgjItcj
sOYiohMyooc6KQT4tbe6B6+NI7txZRVaOfQQ70qpDjH8YG39lrBlTw1KCw7ruciS
xEdcSzJedt+Y+J5rSsbtbrZU9wuNuZOcp1XgffWcApoFtMIHV+RvdDvV+JEG5xp/
ZjV0+/h3I4t8PhUzwnwyzOthBsXDeOakPHslk/FsZybj2c5MxrPcdvAMC6SRh8gb
gPUafcoOSvDEau8Z2l+tR4rW7/hiJa5aDE+k+BtHZjub3ZemVmVd5LzWPTfVk3Wr
c717Ymq/LJzM1Pg7ow38daifnUQYRv7medUH46AIzgGx3/KwbiRHrWEr7RfIoZXg
t0xRz0ItxhEt7OsbjPm0y7Vo3pTfEO8RNU3NFTif3W9o9uTswwcShaBARgxbbU8h
27PBZpDhUrd9sjUSE0gVHY9PJzge+5V6gOmIdjUzUrL8/aGL0Qqqem5K6ua+h6qe
v1ERgurBNa7DiZFrr4jRRwnPuV5LrHPHJX7l+kfise79E0nq5Yn57vaL0UeUkDqa
Htfn6BjzWqJ+hX8cvR6rXb+i/v8QrvCnFBCUjysG8MuFK/z9+cvE6Lz49orRAbuZ
GPWjYWZihJ0MB44FtvCUA9RDgkfXzq9vrG6qVE0d1NQ1V9c11TQvjnqhiiPZKXGu
Ta6E1IkpfV23ura75qYMcV3ketElNHq/NjV6P1ZCJGHe6ED7Gn2F1uiXWjQ6cnHg
xaNV86b8xmsI2+E1tm4GQeuuL46G1n0k4+m0OzKbM97L+DxtWeaEjP9k/JU2N7OU
kpgfz1o3oQ2tmx+f0O8OOmg8TTswrs00n0cy9Cv8l1H/z7XrBOr3XoZ+hf9c6v+X
dgUd/8nQr/C3at2LXe1t3Vu0kfFfxHxkxNaiA29TrZo35Tfm19PyJtU011YPJH0J
CmIv4P7Cm6SSZt3IrKki18gZZGLSK5mr6biIaSXcqUnbMi9NckKvxrV9XIxjCSIM
YyOzJgJuUD/SsAvx3Q/53aCgfbQqDMW/9vA9EDo233lfM+9zOgLzHakjxfc4siJt
X9fj6cmp96Qd5boq/TPXc2knuM5K/z/1jVbju0fnuwgjz7VaerwRIgYj30MdssSW
Y2osiUCNxZO4Fh53gDpvHD84f6A66UQgIKowrrbUuRQND31c0nP1B2/CFCo6B6Te
kg7RYR/6nJrUL/XqdKfbFUNT+X4tKwkrHyMIaGb/ve3nA/+PZNIIN8z827i3ydq1
69R7XPEMh7rHU0FaRIcTh7pWEkeGevu0028DDTjc2y2uJ3mUErSgTlCLTy0Y/4wr
yyIQzSCdINn4LRKHmNVMAxt4wZx+XM0qYAT/fgegTFlKGcQp2o17+MHhGfXSwnez
77TgWijrPa0sCa6eofq9evWwKzKII/08TLKcyYc6vFIa1x5REFltREcUBQCzlVBE
4VInz4kBz3Coe1wYREFHmETBatQWszorAqJAmSJSpN7Dj/tr9dLihCoKb3sHrMER
EIUenpYW8HGF4xx15t2fqF/nXq9mA8YsI0pS4Eys/EUgCo8HNdvS0kK2bNlCZsyY
oT7j+tVXX/mo4liI0xFhVVc7/Ii2OBISEpHHty0JhA3I3xFPvD75wHJP0MFBQkLC
B98Rd4L+ZgFwKbIa6eyMhjKOjCPjxG4cfWzFSMvHVqvYdnKUcWSczhZHlyJ6kVIk
48g47YijS1ECke95EhLtgS5F2LSQUiQh0XboUqR+GkikFElItBW6FKkmlIiUIgmJ
tuJbT4vnXO/XL7qJslu9B/3Yiv461ZghFTi/z0/Ys2eoHoN9gaODfbzS6pnoXEC9
py+oqJ1Fr5/2IGTRqd9d+3r9W7ndNn28zePMK6757J2k3eTTS7udUTP1yIMHTh+5
6oXxk99bsqZmxRGbll2dupsM+zPlqJ03NXzZWrE7cfalz9/33fY+OdP+b13G4XdN
Klvw5+LyJ1/Pmfv1U5nPfEN2/uTwVHpeuPs//60+/dHiW86444XFuXUvpj/550cr
S96+2jE3769+yXeWffPUlkEP33fxkPh5zc/uP++Kyte7Vh26ZEDVB6tPvfzRqTP+
e93vh35dcumcdS/s3jLp5ao+5MrJpKD/Cb/9+/a3x//z3Xc/f3rncz/969zP7rxs
+pqxfWcc3r3l5jlLLzv60PebXh96xN/GXfJu69sffpD/zfiWNS9PfvE5R/fDBh59
yDk//zb7uWumL5379lVnLfzrkWlTM9665eTVC2eedsVv7+fs/78PH1132IMVH7+7
ZdbtX7zyr/4/XdHnlC82zZh0X8FHh20c+MLBq7qvHr+5yzkDHzuv1/THRj+7ee0x
/+mS+OF7Q4a1VigJn7xx/rfFz7zw2cJT/r5h5GeTN7209uaNA5JW9Z22cUn275lf
96kt27rhlXebbrj6hMH7Xj/1ia+/nTw7J2f1sU8c+8QB7uN/2PTM1qanF2/d8OaX
Nya88/m/u/9v5+oLV377xonNf86Y89sRRces3frBgxnffnHi3P1+Tjpwy7l/uzF3
4hN9t1d1WfPXjumTHzuv+303thRM7XF8feXiN75+fPvGr0+Zv/SDy68oWf71w0M+
3O/jVw8fmz9xzaD7D9p5ZM+acTkP3fjnHTe/O/PHf/5w3+qvHxjVt3fjW398d9NZ
D3714U/9Prn+k10nz/nvphdO6/foa3fc8fHlr3x/0+wLj/125uF58+c/fO1RPVL/
mLnP9Rcf+viy5WO39u1z+hU5JU/1zZhd13Xf1Q+Pa32p9tLiMx54/qHRl5/8r3ET
fyp/pvmUxunVdVVdNJN7DsJM7pVKk3u24AEbwCOAmdwbmHRaalF6ptuh8ShONXl3
bRyYi++Fk0kgk3vswyzOW75dSMjprb8mP/jFn+VeDyHMmAZNxf3aY3IPbh/1lwiS
1Ck4h3hOXvwgXFR54mloHBTnWKv+sDi6GHIUcwU4tRzGE/nGcOPn6MZwoxI2hvue
2fYPFyk3C1+lKnPUgvPL6Lp7Y6DOUPtoFSwLwA/1MzPf5/9BJ7/jJgRT1dz7koNI
Ly2HZ7Ycdc7k1fdrMQPlwEw6MLN6h5GDSW9TGoKbEHSpORxCDiV9iD1zfQBCpQlB
K9jLV+y3wfNFbKP5PVztlSXWOnhZ9vMVZSt4vohtrAPi2ytLzDl4WfbzBTUcwfNF
bKPpOsBeWSKClwXYyze0vsSdvbKisy/B2W/z6OxLPK69skQELwuwl29ofQlx7bd5
dPYlxLXf5tHUl5jpn76GsE5rQhBniUTo058WAkZMV+91RkTSBhJ+HDkII7yhNhiB
nmMGc0b0Up90dFpGHKY+6ei0JgQPFmIAoZkHi2HLecZiOy0jDlGfdHRaE4KHqk86
QusREWdE5HpEH/VJRydkBDMhCJK5PYJImRDMS9zqysvY4Z6c+IcrPeN5N1t67OaW
JgSN0G2f5SV+k8l4lulmPMt0M57Fzilxe7bP+mr9DouPAK5ajHYZpLDD3zhykHOd
e2TqlVnDnC+6D05tyJru3O5OST2xU5kQfEWzKdJKzA0lYRE3xk0IllPVMyWpwF1J
VU8+FSGoHlw7ngnBw/aKGF2T8JlreeIl7g0JyamViTXutxJ6pY5JPB5qqp1idA0l
5BKaHtfP6BizPFG/wn8D9a/Rrsl0gK5M1K/wf4v6o3xce1H/MYn6Ff7+/I20CUGs
7ncoE4KfO/u6znb1S01JOdY13ZWQenDKTNcw17cuodHbYGQuNk0IXhrEhGCy2uhJ
TLmqYCYE2Y61sXUzCFo3OkwIzs14L2165iUZl2bsSivOrMm4PWOf9IMyj89ovwnB
6XTQeI92YFwvofnMzdCv8C+m/ru0aw31uzRDv8L/IOq/Tzq7go7bM/Qr/K1aN3Im
BLG1GNMmBFOSvsk8no6LmFbCdU/6LXNk0mGUI7Fryg7iBZ9gxIi78sjP15Qdru3h
eyB0bL6j48OHzzysEJjvSC35LiIY30EpfLivFQLzHakl30UE4zvm3vBh2t0agfmO
1JLvIoLxHQtO8IGeD4TAfEdqyXcRwfiOVVD4aJurlgjMd6SOFN9TKN+PSp2WTjLZ
0uIHGd2Tjkkdl/5zRuwZVQSf2NdzgEq5+lDAvTTsLK8b9OPuqe/zXe2d5U7CjSqu
nHGBz/FZPMOh7smaUcW4EIwqokcwtPjUAiTGB9SLiGZoWpBs1bWQFa/3BjGA6Ozj
9ONqVgERyEs0qkiZotoU1YLVe/jB4Rn10sKpa/Uw116jio/G8bfORyNgVNFXFNZl
MFFo0UTh2hgUBahq9hEnoIvCZX6i8PQ1f2bvfH6riSgsObxWPVEO4IpnONQ9KQyi
oO+JhEkUrEY3URQeFgNIeESBMmUpZZBXFHAPPzg8o15aeBhE4Tevqd2bIi4Kn2mj
wlOZTBTeyYw9UUDr4wfZGXRRmKD5cOwsv6nHsgd+H/BPE1F4iVylGlEAcMUzHOqe
GAZR0OOFSRSskoii8J4YQMIjCpQpuymDvKKAe/jB4Rn10sLDIArTvGuRy+IjLQr/
0UThNU0UvohBUVC5ZiIKGru92FluPHKgiwIsTMOmCICrbnXaRfPH8hlE4cXk9oqC
N0m4RIEXYYQoCj+KAcRXFDBMtUcUYF2aMsgrCrg3Wp3Wwk1EYeXQtonC195R4a6I
i8JYTRT6aaLgiUFRYFNnf1H4UvPh2Fm+fMJtszIf4p/5iaLwEFnu866AZziIQnwY
REGf2odJFKyWGUVReEYMIOERBcqUhcZ3BfjB4Rn1sn5XaKso/Deei8LGiE+QHtBE
4RJNFG6LQVEArfhFFAZdFJZpPhw7y18/dfiqufc/YSIKDyofCTHZMxxEAZ94QRRI
CKKgT+39RcF6tgNYiAJrIH+IovC5GEDCIwqUKc8TnSKVOvhxf61eYRKFXd5R4ZiI
jQpxZHnaBNfD6Z7Uu9OaXavSD0h9Nu1i1+L0hFTUXhMFjy4KIoxioDmPGCcyMNYs
1E1tce2PbXR2J+xHhmiP1cB/ZKg4en5kSP6cREhxOiKs6mqHH9EWR0JCIvKQPych
IRE+yJ+TkHFkHBnHN478OQkZR8YJNY78OQkZR8YJNY78OQkJiVAhf05CQiJUyJ+T
kJAIFfLnJCQkQsWe/TmJxHj2cxK/0OCkbPXnJK57/fSuQ7ttOmzKyBE1N+9qPW37
8SNzTj3v+TFvXtu7sMfFa2+8fFz+vHdqFz47a/3onC/6LhuV89Hfdua4d8f/uP35
E17blXzqEy9c98r3vz941IYPxx08+dfuL+9a/fqa35784awxV9z7ZPF3J5y38uPf
nIcv3LFzUPnSk0/Kybjn7Fu/WvzF+lf2nfTHDzW7Ziy+YOXMj9/7LHliwm9LL/hm
81lZPztWDZ167tr5/6rucXHGie8/fEqO85Ttlx13+Y7X1x17w/jFbzU+92Ov9O6u
C+JWbnRt7zXyzjFnHj/v3ok19/xtVv37udM/HHjHrZcUXzd2lOeChDNf/rr2xIxL
lnx/8KqXb3RvmjPziPWPvHjWyu2JD1z13YNf7vP+fY9f/WzhrrNPW/m3C5q2fbjh
7IzeQzYufe2pnOK0i5b9mbV484bqXRt33fnnul8ufGTaQ/N+q38p95bnG175odu/
r/1Y2XXlVSffP/yJI3u+d+VxX/087KhbDu2xKOO0lO0XVr8/5F8vHfewcv133+y/
fnb+0YO/nPDr6r9/l7lw+n1nnzTvyWfGD5n701tVuVse+uz4zGVNd96x7cx/LLzy
3XPXfHHCYOesyZmzM2fnZPeclLn1IkfR13+d+NgS9yv/+OiBXR9+tt311KKvvx/y
z2vHldwz5PRJr566/tQ7y5SJr979dNLTnw55583ahT3fO3D7oB2jfswbfdw/Pli2
9JQHnt1W8W1D7xUHvpBRuXz20G9zF5TekrjgxGtOGrZ86jXrn91x1JlXn7Zx0eFP
Kpm//Xr3D90mrzqxqkeft454PP6uHTe/sfV9x0t9L+r11z6TJs5755Pz129r/HXN
D1v+vu/s479efN/Z5c5xp2X9ef7M/53ZsHN03jWzr1u3z/ABh97+7X3dmsZtunxR
Xte+w7svL77gpZLlxe9umPfUS7Vdnbc9PPqf716/qa/7pIvHTTpjzhXXntk054of
/n3re7kPj1OufLvvZz8uOmiNpzav+Pjnbx438z+v3jxuyPXvvl6HhC/NKVxtSJjz
7+/qZq3x9Lt33K41r/f9R+lDo8c+WfbQS1+uKX+q+pGU895877yWl/O3Jcy86IEL
+mc/3ff31wY/PC7ul2Fzdzm6XPhYd/HXLeKo+MDO0vD6hsVK/SxF/sqFPXjABvAI
YL9y0T/ppNRjU1LdcSqP4sm/ST5potoLH3Pig7V0gl+5iKd/LJn/r1xcon3ux2N4
0VLrYf6+YUjDymL+aCruF/hXLsSc9F+5QIfYR/3ULo6otk40oN051pJRhMWEE2MB
vHQOMaVZ+CqVM8iJa/ruXh/+tajZLzJweH/LwaM/K6gcUdTcZpMRZKSWg/G0Erty
+P8qxMFqDnPIMbTGZjRY/yoEt/PpVnMYTY4lY4j+CwyBYOSPEYgTvt9yCB9N8lch
GIKXZT9f/eSznXwR21gHxLdXlphz8LLs5wtqOILni9jGXyMA7JUlInhZgL18Q+tL
3NkrKzr7Epz9No/OvsTj2itLRPCyAHv5htaXENd+m0dnX0Jc+20eTX2JWXOerfnp
M4+/dbvvmE+WVJUjCzb38Dd9z8DT6FfxVyECUQCgdA79NwAOU3tJGZnqSCe7aI3Z
80rHVEeG+hzE2nMQ+9+e9lh7ZowaoT7pEH4sQWXUdPVeZ1QkzV6H/mMJITBipPqk
o9MyYo76pKPT/mrEMUIMIDSL8DH8Ywl4lRTRaRkxWn3S0Wl/NeJY9UlHaD0i4oyI
XI8Yoz7p6ISMYL8ageR8mSlSvxqRnfiG62jX5+6Jib+4eruedrOlPDdNIn81whf6
ef5FSSWp65Jz3NdTXrUkp7rPSxqeem3yIe7YO88PCy/phC3UJjPKHbC27U3mxaAe
K4fu2/sN7/Q9LSFRq6kZfhv3NuUTzvP/mzSRKprpFIfan33O82tvDALMzvN7F1rj
WnxqgdK58WdzqNFQiN6kSGRFNrIyhrHVYp19WJUNdJ7fGJ9DC8bVeL+bMmuplkTw
b/UQdnYf19YA5/lb9TL18/yAfk69PaJgoNwHuii8nvxY6v+cOe6fkj9IfceZ6n4/
+bnUH5yxKAqw+5XhJwolu7zJvOCr6RuO/yPrxiu/NYiC+AUs0G9TvioK2BUJVRS8
ewrhEgX/Yhn2hCisNVh5wZUyyysK3C82RMFJR9IvM9lImupmI2mqm42ksSMK9n4E
ZbY2G+G9R+9XkfwRlD+TbnQvdl6apSQ/457snJtVmvyee7BzYhYhBe34xYSC+IR+
WhERhJG/oZoOCfZbQgox/z2ME7UfTFAIymE0+P9gwt77qQQnGUTnoSck5bhn0Hlo
DpUczENx7Xg/ITRnr0jPNQkfu5YnXuDekBCfWplY7X4roWfqmMRx0E4Ojb8z2sBf
7SeELnCznxD62MV+Oohf4Y+fDqrWrvGp7KeD+BX++OkglI9rz1T200H8Cn9//kb6
J4Sw7d2hfkLo+6R17uXO27O6JL/ornQuy+qfvN09hqpOodEFa0s2Gt2jFhBRmDc6
0L5GT0tijW71E0J4/VFVZgtPKX9CqOP8hBC+Q4npnxBKSvoyczwdFzGbhOuS9FPm
sKRDKEdi96cO0BPAaVBs9QYCeN+QCMvT96cOENoevgdCx+Y7lUKth4fCd6SOFN/j
yY6kC1zLnYtS05PvdVU6J6X2SX7eNcY5KBVi7M93UXqMPOcu8uhFXaPwbFyRBRXi
iuy2FoUwfnL6vP2E6C3zrqpv4JNONVYK1rv9QiopEyaZhjxG09wrLApva5eOCsRD
fSB6J/GxlOtSXnD9L/GDlPkpt7i6Jv2cckrKhS6k9Z9miDC2leY8H1CF/ATtaFel
6NcXaH7wxxUj9CfU74wU/XqL5o9rD3r9g/pNS9GvoAf+uLKSLuZkkLZPMziTzIw6
soGIgw1EvQg+Ou3mM81AORMWVNTOr1YGK7nZefll+Uq/uiY6pcwn6AesJ/jbfGS7
fcmatsFkhe0fmI1QbZ2GcKAEpESJkHi+dYA4u3aT7r72IBGjP1HtQZJaaRHSXpyO
CKu62uFHtMWRkJCIPKRFSAmJ8EFahJRxZBwZxzeOtAgp48g4ocaRFiFlHBkn1DjS
IqSERKiQFiElJEKFtAgpIREqpEVICYlQsWctQjbGMYuQM+lV2V+1CHntq+Pf97g3
XTNxyZ2eEZ/euuzNv03+ZUvq5c/36ZU+7MKRI/o/PHjk+Adbu3x2ydt3F++4LWfz
8u2bS3ac0/OYj5Y1XVZRfPqGc584o+XOun6Xdnt3w0cfv/Lt0lnFU77NuXSDx3l4
bZeJO958ussHP2xdeNFZX5RcNKz0XNeA9Z/8L+2gAa93nfjzuyWPrey9+qmJn23b
mP+vcQ+9cdXmOeceNO3qdWe9+0X2vjfvKFv055UXDxm+ZskNLx/805b5R497fuwX
cSs39fc0TL797Yrjnzj53uKF57911CP3TPntxW963Ju+fHiXif1bWmbesP9Pcx78
csGKKb9e8K++8Udsf6LPF8e33P3yVf/3+TF9L/vm+sVvbv64PO3JLX++P+PUdzf9
dNHTGxt77Fs996Dnn0x7vecPR/zv3q7vXf3S+tNPf+/iIzc0rP74lR2FT/U+5+U+
2UdOKvx3620rb36j9dreXfoesP0S933576RvHv5Y0bLSR09KWv/lqNHnl6w6q2bG
X0/XXLTmw/0/m/x5t7XZH9x+7t/7Trvu9emD0z4a/sSKV08eTG56dvtbs7fOGPf+
jvOPuOrSp5b1v3jBun2mTXkpq89H76we/9BBN2SvHrdv+bSRq+c2ZRb3rn/4hofX
9Ou+7LJf9h166yFfZDbfPeipx15ad1uPyry8+Qsevvbz0bVjX7ny5d/nnXb2pu9W
PTp60Ecbx+06dc31N/y18bg1MwasKV581q66mWuqdp908dPJW/sW3PxRYX3+th2f
Tco8d+HknPuf2PjrCyOvuPuau0uSCu9cuOrxJT023r1k988fxK8n58bv+iX+iux7
88p/XPbeYdNffXXz0Me2JQ+8YcGjNT+3fPPSiH+U3/BKVbeTXj5p8o2f7B787Ls3
tfQ4c8J+N6b8cvsff12b8svMhxel3zbvXz1E84vxtK/imMbEirrTm5SG2vrmI5Vx
FXV1A6fOqWmuq16sNFc3NcMuo7TP2DZ4wAbwCPC1zxiv8ki0z8g+CM0iwewzrtS+
aNuz9hm/bxnhYGtE8AG1am/RondWcM7xNrECeMfxAxnk0D8t5QF8XBDHh84M8MgK
O3H+xctBicDgnNT7HTw4e439r7ND7HdMR/6wlF/1fhegc0po8O93so9Zw56+kxwM
Ds7JRAWf4Ots1ec2CcokEhlefu/R7VhjrsTtWHcl+pwLVPF7XzvWYiwziCnNoNux
5tDtWOOKw15mNqQ5rO1Yd1FrNJaMI+N9ctBSbK/3eL2A1kbhmdkN66rmcByZQI43
pSG4Hetuag4TyQlkEgmfzehozEnasWYIXpb9fIWTWTbyRWxjHRDfXllizsHLsp8v
qOEIni9iG+0nA/bKEhG8LMBevqH1Je7slRWdfQnOfptHZ1/ice2VJSJ4WYC9fEPr
S4hrv82jsy8hrv02j6a+xOxLjtX8os+OdVeDHetue9eO9Tj1SUenNd88Xn3S0WkZ
cZz65IV3yr1ZFQd/Y72i6Bgn24hjhwUM/owAgjAiiGj4mGbVYvrBnBEThBhAaDZq
Y9h88/Hqk45Oy4iJ6pOOTmvH+gT1SUdoPSLijIhcj8B6j4hOyAhmxxozKlQTiJQd
60M0O9bHSDvWRK+HGXTjvYuSvtHsWGemMTvWv8WoHWv8HBwW+5g9LZVyh7kda4Zu
HvWyvd7jJIHsWAPhsmOd5Q1t8akFSm+X8V4rspGVkSS2q66zD98JQbhQD+M3RIAx
PocWjKvx3uu0aNpzq4dEvfFe2LH+QbNj3TWN2bH+X4zasYY9Q6xa+4qCmR1rBu1N
ttUoCuK5HY5w2bGGQSSGlvCIgn+xDHtCFNaa2LHmDtF0v1gQhY5kx1p/BiWcQvCX
WeIdq81GeA/R+1XkLPE61ZkKLB1jphLblo6D8fe4vcDfOPJW0v6um50HpP6WNMR1
lvN3V2byFFe1czsVca/R2zaYRc11kH6shEjCyN+2WqPjYdwa3TLN0rGV0dssgjft
ROhfDQNUXal+Xtd+m7eRNocKI/Dr3Yuda7OU5C3uyc4zs0qTv3UPdlZl6TZv29K4
+fGx2LgfaaYGW4m5zVvsm5tZNA7VCHxbTQm2vXVfSPg17ZHEpoyvE/ZPvzzxuIy4
xPz0JYklGe1v3RcoIU00Pa6/0qo+kqhf4f819T9Ou+6fTsjlifoV/nH0ivJxzaf+
S4Qr/K1a97z49rbuWE103bvNRRevOWatOy3qW1faqw5urxozd2mv2uuiw24y3tzR
OOC28W1ChPdNiLA8fe0m4749fA+Ejs13NpixT8jaz3ekDj/fReu3UL/9CazfStO3
9uJ0RFjV1Q4/oi2OhIRE5CFN30pIhA/S9K2MI+PIOL5xpOlbGUfGCTWONH0r48g4
ocaRpm8lJEKFNH0rIREqpOlbCYlQIU3fSkiEij1r+rY8jpm+zaHXqn2Z6dtTxvfM
c28ad84QT5az34o3T127r2f6j5e7l/Xv07v3qM13zLmiR+60t1e9s2zdHZ+cs+bn
A8/Ies0969NfZi4Y12XZ6mHfjFpV/vZT+/2v/KD7H/58TPm1fc474L6uE+e88X3c
lqWTfm08cJ+tjcN+/zAurd+zuw8ZdOL1fQ/d94HTJqy8/o2ll303qXz/D3u//NWF
xdNvu+PGw2qOKV7Uen7x4MTLZo/a/c4Rb62fVlpx8NX1Wya9vK5ry5/3xz3XZ/X0
c4dedcPMBx457M9fr/ty60l3VLw19953vska90nCzAuLxgxY9+717/c99t3ME2cd
9kjVfQPfqh/b0P2UxJMPyls85ZMBV179Z/a0Myt23/FYr/T3b6k/q+73U8/b9XVd
xVNnj++Z/82vddM++envJ6W99dvh3W+vL50/6fDXR15x4T++TerW7fuSe7p0PTC3
paTw5Kqh7lsPm/Dwslm1T05vfSSnT/dPJix465mjP7zoyEc3PPzavo8OvzhpwoFp
04v/ePnndVsLns7bMmbbBXcnbz+g8NKlM5dtefnsky4bceDSTRtyp2Vl/Gfjxpz/
bLy18MC5g8sO7HbUiX9+mz1x0rnL17vL3mwcUj7yLvef05ambCnvfdDNqz7duOvK
/brN7Drmgrtuufu5D/Z74fbnDqie/dU/X7ztgjFd3/qk17grvvlmzRlvPvfcR+NX
j911Su2yH/qPu37JD6c+8c4H8ePuGD/4jhtPeP2ukhuXPNp16usJp/3jo9POOp08
lnBJ/NnzX6zyjBnw8skTjhpx1x8jj9p87iGb36x/aO6UzC/OfnDV72+8OL5vU8+G
uxuzdh12yPVzy8mIV74oFO3YJrTVjm2htGNrCx6wATwCfO3YJqg88rdjuw+Rdmxj
B5xz0o5tuGHPrqNEcPjbE4UHZ6+x/3V2SDu24YJ/v5N9zBr29J3kYHBEix1bXLkd
215En3Mpwr2vHVsxlhnElGYIZMcWs3LYHDGzIcthbcd2X7VGk8kUMtXMjm3rJI/X
S4W/Fdoeag4nkmlkuikNRtNa/jnsp+ZwEjmZnELCZzM2GnOSdmwZgpdlP19uvAcI
ni9iG+uA+PbKEnMOXpb9fEENR/B8EdtoPxWwV5aI4GUB9vINrS9xZ6+s6OxLcPbb
PDr7Eo9rrywRwcsC7OUbWl9CXPttHp19CXHtt3k09SVmX26y5hd9dmx7GezYKnvX
ju0U9UlHpzXfOlV90tFpGXGi+qQjmLFOUXQKPd5bDTFsx3aaEAMIzUZlDJtvZRXV
0WkZcZL6pCOYaARmRGg6AgjCiLaIhpEBHOaMOFl90hFaj4g4IyLXI05Rn3R0QkYw
O7YgANUEpB1bHZxr/HnP27GNT2N2bA/T7NhmpsWmHdsMSkEvYjTeaW3HVl9ChPHO
wJt64bJjix8MY2jxqQXb2gm0hCdE4wi0Lo+sePEcbFddZ1+oxjs1J957nRZNe271
ENVQpwfX1ug03gk7tj3TmB3bcs2O7WFpsWnHNpNSoPiJgrUdW+Jh/42iIB7C4QiX
HVvdAlhLeETBv1iGPSEKa9tsxzaaRaEz2bGdrM1GeO/R+1Xk7Kx2Jju2J+4F/ko7
tqhhMDu2+xBpx5Z0VDu22Dc3s3Qq7dh2BDu2+KbBrHWlHduOYMcW35tIO7ZeFx32
VPHmzmpn/aYBeN+ECMvT154qUreH74HQsfmO/ovaYbmv/XxH6vDzXdqxDSVOR4RV
Xe3wI9riSEhIRB7Sjq2ERPgg7djKODKOjOMbR9qxlXFknFDjSDu2Mo6ME2ocacdW
QiJUSDu2EhKhQtqxlZAIFdKOrYREqJB2bKUd25i0Y5tIOx4+MZJmatsGD9gAHgG+
ZmoTVR6JZmrZl477k2Bmai/RPgXbs2ZqdfNrmEdz82v7adEB+HD4ml8TYwG8dA4x
pVm4bn6N60jd/Bo0J87dmpk+47A2v9ZTze1UchqZoeXwyUOOSaOq7i6/v/qSrUMX
f89TavDmRPhx9wPUHCrITFJpSkNw82sHqjlUkWoyi4TP1Fk05iTNrzEEL8t+vvzM
ORA8X8Q21gHx7ZUl5hy8LPv5ghqO4PkittHsF2CvLBHBywLs5RtaX+LOXlnR2Zfg
7Ld5dPYlHtdeWSKClwXYyze0voS49ts8OvsS4tpv82jqS8wsyqmaX/SZX9vPYH5t
/71rfu009UlHp7U6NkN90tFpGVGhPunYWX5cz68eOmf8GFUc/G1MMdFZfR3wEhc3
L2LY/NpMIQYQmmmlGLY6Vqk+6ei0jKhSn3R0WvNr1eqTjtB6RMQZEbkeoVeLoRMy
gplfQxL1MDOJnPm1bM382kRpfo3o9TCDaH7tjFRmfu2qVGZ+7azU2DS/5qIU4OQ6
FmqTGeUOc/NrxiXEtIRA5td+G/d22MyveTttXItPLZC6XTanWAP5A1kZs2OrxTr7
QrU5pTnxfjdl1lItieDf6iFRb3MK5teGaubXqjXza+Ni1PxaKqVgfz9RMDO/tivv
y9+/veuh8pV/LT/uqq+/MoiC+O0o0G9TftjMr3kVebhEwb9Yhj0hCmtNzK9RZnlF
gfvFhih0JPNremuCEjyxXuMZysyDnarNRnjv0ftV5MyDOckgzfzajJg3vxaMvxV7
gb9x5Pukf7iXO+/J6pL8mrvSuSKrf/IX7jHOhiyim1/ztIG/DuJRC4gojPwN1UJX
l6TA5tcwQJjZcGLfDhhtOOGjAXv21yJvw+nPpBvdi52XZinJz7gnO+dmlSa/5x7s
nEhbt6AdNpwK4hP6aUVEEOFu3Vc0QzWtxNyGEzbO1dZFBBWxYn/tmoSPXcsTL3Bv
SIhPrUysdr+V0DN1TOI4jD1cdmfYb10quzOuoYRcQNPj+jEd5pcn6lf4b6D+1do1
nr6LVybqV/i/Rf1RPq49qf+YRP0Kf6vWPS++va17gGZ/rd9uc9nFRw0OcqCP7NIn
cnTt/PrG6qbK6rrKaqWmrrm6rqmmebHSb2j25OzDo7nRpVm24GbZ8B2KNMvmddFh
Hgxv9OAX3h6s3kAA7xsSYXn6mgdD6vbwPRA6Nt8hRuAXlk7bz3ekjhTf48nXSR+5
Vji7pGUkx6VWOb9P7Zu8f+pY59upEGN/vosw8py7yAOUNwrPxhVZUCGuyG5rUYiX
n94Yaj8hesu8q+ob+GRQjXUq2O4XUkWZ8L1pyOM0TZwQsq1dOioQD/WB6MPELq6r
U3qmOpKKXY0pv7n2Sxrvmp6C2YK3zYQ3BxHGttKc50OqkLvQ9Fen6FfMHuCPq4NO
y4qpf2OKfv0N5SWx6370Op5ep6foV9ADf1wZLuY3pO1zS84kPhCJ0sYGIg42EB1E
8NFpN5/ZB8qZsKCidn61MljJzc4vLCpQ+tU10UlHPkE/YD1BHJXYSMR2+5I1bYMZ
Kts/MBuh2joNAXhLICVKxBsqX4VFnF27SXdfQ4qI0Z/AkCIhtdKWor04HRFWdbXD
j2iLIyEhEXlIW4oSEuGDtKUo48g4Mo5vHGlLUcaRcUKNI20pyjgyTqhxpC1FCYlQ
IW0pSkiECmlLUUIiVEhbihISoWLP2lKcE8dsKZ5Ir8r+zJbi68e9n9tt06szjlJu
n/LpNTMabrr9hgXXdTuj5vCRV+x/7y1XbBs/+b39c9PP+PzEzd8/uHTG0oTkXV0z
Pij9z2kNHz3wt/uueGXc2JenDzz96av6b7q0/IfBS2+6qevzQxZ+cI3z5j/7Drut
+Psn/v7NcVv/GnbN77/EVY6/P6Fr7e9PLev5+OLzXEP+yEjv3++z327p1XPfo8t7
1zSXFU5/dtPVz59xTcldY6bNWZJRl7P26fvrK++ffGTvG+fcsWXSK+uyyOCpjmVT
rp1+7uitHzY+/uTr1792QXXRe5tOHXP6vR//cOvKLo6EbjWTVyy/oujRc9c9mDNi
TdqA++8bmHdfwmO9T378yl5dzp5423Ofrf7vrrt+7PPCx8mfPfPkkU92uzh1+RnH
9/3iqm1NDU89MvW/H5Q+P+7GtA0P9n91xT/HjPtpQ9l1X8zrdufJ6+45f9olv52c
tt/+zQ8dPqziGcdHzk/yz/iQDF42ZuCdXywYE7/ggNfyfjr6wfrCez4+6vQJT5w0
b+PMoxLvTL1mx9rbR1395T+nHJe4aULOzIKpma0jvzrzr76ue+qOuqHh9s0/Hrnt
/DcufO7Q/+t/5D2jNkx8a9Xbt7418sEdnx62cNW61VvOPX/nMQNnz+/x/MVvJP81
cvP2FX/ED+7/+jfPjp1+4eQBfW9/5b5uTQu79exaUD37zwd/OPvOzytePvSg+w+/
YunUvtdcM/WzKy+4sPqEvvX1Qy4ecMW3Nz3fv/SE6plb1iz+pe/izEk37P/LxUuO
HnzrR4u+/nDWfTe6dt27ZPcvdzlmHHRk8s+fpn6SfZ+7/Mdl742c+Oqrm4eWvps8
8IZZG+77Ze33hx14+JAjd7zU75ErH+1/xSd33PjJt8d5ul9/V9px5y+5YlD57cOe
2Hbqn+mfDvlXD9HoYhLtoeiBRQOLlTkNs4i0thgEHrABPAK4tcWTU/PT09zsAzB8
jJlPHcA+FetNYG2RPQO+1hZPcYq85TuEZtDDEF9Mg6bifoGtLTKwUN3aIrTZPupp
+1T1bDwHPkLjgL0WjmzhPke4Bzc48oR7fD7HUSDc82/DgSLhfi2Z42BaEl9MihQB
vKYcIpVm4SLlZuFibczCxRqahYu1NgsXOWEWLnLHLFzkmFm4yEWzcJGzZuGr1HYD
p/mIZsd196ZCT86iDp9V4he+8dFjd4IeBYuZ7BNnWOfER7hm1itFe5e+z2nEqX5J
2U8tsZnMJadrOdzyzPn/rR69WYsZKAdmseRwNYf5ZB6pM6XB2oImz6GPmkM9aSBn
EN1aZZomS1bAO+zmid98tWupP98Rbj8nEe3PyZjSCMSRFjQZgpdlP1/hy28b+SK2
sQ6Ib68sMefgZdnPF9RwBM8XsY2WGwF7ZYkIXhZgL9/Q+hJ39sqKzr4EZ7/No7Mv
8bj2yhIRvCzAXr6h9SXEtd/m0dmXENd+m0dTX2KWrZoNYTvLP964etGUwmHleGJz
D9GylWhBk889dIgWNIMBpXPYtmzVFltnWkw/GC1bMUbMFWIAvtMhZ/J09aozogOa
+GKMwCEdEZ2WEfPVJx2d1kImDhWLCM36XQwbhsTpMxGdlhH16pOOTmshs0F90hFa
j4g4IyLXI85Qn3R0QkYwC5nwxRlkIHIWMt90ZWd84Z6Y+KvLlfGMmy2/ZrmlhUwj
RFtoX2UynqW5Gc/S3IxnHc1WV7PW77DVBuCqxbB95rqt/I0jPZ3Xuoelrsgqd250
H5RalTXVucWdlDpWtNXVRns/agERhZG/bT1xz8P4ifsXglhzwiKuAwLdonlTfkO8
R9Q0NVfA1k+0W/iBybs3XSck5bpnUNWTQ0UIqgfXjmfybv5eEaNVCdtd5yRe6H44
ISH1lMRZ7lcTDkgdmTgeaqqdYoRdzAvdbDdzOx1jzknUr/B/mPrP0q4JdIA+JVG/
wv9V6o/ycT2A+o9M1K/w9+dvqGaz9gliNgs7GR3KbNbjTsW1ztU79UPnCFeLa5fr
F+fJrjmuL1xCo7fBbBZt9H6shEjCvNGB9jX6Cq3Rrewc9lYbPdnPbJa2bW9s3gwS
PYYOpVW04FbRsLdo1rwxZBXtq8zxdGDEvBKuS9LPmcOSDqUciV3rXNjCPpQIRp4t
gBpxID9f61xI3R6+B0LH5js+GwDf8UlBIATmO1JLvosIxnd8qgG+QyEFQmC+I7Xk
u4hgfAevwHd8OhMIgfmO1JLvIoLxHZ8kge/GAd2IwHxHasl3EcH4jtdP8B3jayAE
5jtSS76LCMb3noTxHeNrIATmO1JLvosIxnd8+A++Y3wNhMB8R2rJdxHB+I5FEfA9
EM+AwHxHasl3EcH4jpqB7xhfAyEw35Fa8l1EML73IozvGF8DITDfkTpSfI8jy9OO
d32WPjT17rT5rqfSD0x9Nu0S1x3piango8Z3j853EUaea84jxokMjHwPda1PbDm2
/NOfYPmH+rXwuAPUGOMH5+UNVNvToS3E+9seztbWJ+LDsKCn5+oP3oYpVHZKU6ek
X5TB9l1nZ3RJGpF6bPrSjNj7iTFwtojgJ8ZAi0q52oC38WbUsLO84I2J5St/f7uc
P6cR/hNjj/Ra6mNSBc9wqHsalaRF6k+M7STo/UO9nRo/MeYPs58Yg1QztPjUgm3I
sBVBcyCaQTyRCB3IDMgqSbs3no/gBXP6cTWrgAjkxU8+AJQpX681/MQY/ODwjHpp
4bvZqSU4D1wrS4KrZ6h+r1497IoM9J8Ycya747iY3hHXHlEQWW2EURRqNFEYqYnC
KTEoChhuC01EYZOfKOz7xin3D3p5m4koPHDoAiEme4ZD3VPDIArgOUOYRAEf5Jgh
0qJAmSJSpN7Dj/tr9QqTKHzmFYXW+EiLwiJNFCZpolAbg6IADhWYiMJjfqIwKbHX
9Kt/ecdEFO4lT/mMCniGQ91dYRAFvNswhEkUfD/G0iGKgtU5yFBEgTLldeOoAD84
PKNe4RsVnnZwUTg44qLQmM5EYXw6E4VZ6bEnClh0wFlioyg8ySrhxc7yf9+033PJ
v35qIgqzXHNUu3MArniGY70ldFHA8gpDmETBrGBAFAW8b4ngBYciCpQpD1AGeUUB
9/CDwzPqpYWHQRQ2eUeFlREXhVmaKAzTRGF6DIoC1j3zTEThZT9RmPJOy8V3jf7M
RBTudZyjmmEEcMUzHOruDIMoYIWXIUyi4KXBAFEUDhUDSHhEgTJlPmWQVxRwDz84
PKNeWngYRKFHPBeF2oiLwifaBOkJbYK0NQYnSNh6yTURhePU/zp2lt+z+krPxFPe
NBGFS50rfSZIeIZD3ZPDIAr6IliYREE7C+iHSE+QKFMWGydI8IPDM+oVvgnSid4J
0tsRf21u0kaF47RRYXYMjgpY/8sxEYUn/EaFVd8fW37TTrMJ0gdku8+ogGc41D0p
DKKgr8OHSRR4dzdCFAV0DhG84FBEgTJli3FUgB8cnlGv8I0Kv3pHhTcjPiqcq40K
p2mjwsIYHBXwAUq2iSjcq/7XsbN83OQHKndUmb02z3XVqvaoAVzxDIe6J4ZBFPRW
DJMoWCURRQFHqUTwgkMRBcqU3ZRBXlHAPfzg8Ix6aeFhEIXfve8KZ0dcFO7UROE8
TRSuj0FRwJ7OQBNRWOEnCvvFf1N69pytJqLw27i3SUtLi3qPK57hUPeEMIiC/jVC
mESBF2GEKAqDxQASHlGgTFlKGeQVBdzDDw7PqJcWHgZRuMUrCusSIi0KzkwmCv/W
ROHPGBQFfIY7wEQU+vmJgtGily4KL5GrfN4V8AyHuseHQRT0D6LCJAqMbH+IolAs
BpDwiAJlivp+oAWr9/CDwzPqFb53hQnedwVXxEeFB7VR4VJNFG6PQVFwE8wF/EXh
bD9ReLLs6imb3ttiIgpm4K/NcQZR8LRDFPRvMsMkCqyB/CGKwggxgIRHFIgvRfwe
r85eUdD9QxWF5V5R6BuB12bxh52xDNGfumFoNWQDxiyTP+scIE5HhFVd7fAj2uJI
SEhEHvJnnSUkwgf5s84yjowj4/jGkT/rLOPIOKHGkT/rLOPIOKHGkT/rLCERKuTP
OktIhAr5s84SEqFC/qyzhESo2LM/63x3PPtZ5zX02jRK/Vnn1U/Vv+Xptun+gcok
z72Tzl7xcWrXmcdceOKbf99n3dEjuqVc26XkjOmPvnDfASd0ufrvS8kD6xfO+G7z
+Vedk5LydJe8vNyjR71y8SfZj1y275evDU5+6eD/Z+9K4GLc3v/b1DTTTGVsoVwm
EpFSpK7EkCUlS5bIRVquGykUV0lCdnKzlDXZyeXa9yX7tV38c2VL8iNLKaTFcuv/
Pu/S+zYzNaNpaDnf+ZzPec95n7O8zznP+573nXO+54T7rg+3sk/nn8nuEms3eVLy
vmV1uyfk88381+1pH1wU7tci9ZDhi1MvG+3hnN7kVNT/tjCofeRzo3suJ4xDJhY2
sI/aMHbOE9Nz8cI78ePTe1m8XOd69s3DvQ30HHpaNm3+39lRd4LHzT3xYt/bmZ0G
+zt1iHg1TnLM13HDDttVMTGx19vE7T+45vqewEA7m7TfTo9a1qN1jGTngXG7Y7z1
2/8+X+uffgffTvTK2XdkU4743EHzlW8/L2s78+BzjyjLp19ygkUZ9RZc+idVEOT5
vws5Oy7kmHs+rnd3S/ifnydeTy9sfPrM1KPvPGdc//PzhaQz62vNO649b+z1izd3
ea455tzducHIv34NHR9+vaNZ2n+axs9MPNrtLPAyGXXE337lvdd7B/CT57XhpEWl
fdn+svGu0+a3O3rcujdy0rAxZ/x/FmzrmOJqcHltxyb58RO18o8N7Z9f6Jt1Lj70
BG+uX8qF4/OD+sfonZif1SeSk3/GJ6tJve1TAv/MaFL/n6Q587MW944JXLd76AXL
Bks3vApP/3WFVsCoRZwetrY7Y3tNOWm+BHu5wulqk/aXnONGfPy3vv2Sny7rtxTs
v3B/TOa7eBEebPKBY29+Tc/e/GoDCNXzmo+fTOtmPLWhfefn3KnDVo7oPv+97egX
+sLHI1ZffejQqm/Gk2OfVm/j9Y870GDMM58w3bHGfy1IWXm9reGTzY90OztMDi40
GBDv2nHjLUmWY3zCCf22F2Njcgo/P7nlFBowYFxoXJsoXs//3GcVLto640nqzCtt
Trbb2Wec1cpLN3RPGK0+bvJ/dY6v0Wk/p0Hsvr/FpmvHTJ7mHcsbfFlr0WAr4/gD
9VZLhndc/e6ZqG6fM4ZekyVdwlyX6tTb5WVttdH0lN3FHsv/mrf67ljbWoO8OT0T
VgefTBnYbtYB/3Zpl4xNl4fZXHzu+ebfnLurJdGtTVc5+9brG29u1HfapAULTUbr
WYXM+ODaxsZ0wNZFVy+GvX5Gp7D/dKePTBH+Nx92jrcG2T47khpx67a6rl13VGOv
ZlfdHfuGNzj7dhtRX7+jj7Z4cnwfeJ5f7NjX5NO4BVdbfoihrmXN6rHFKTwlvn3j
nerX3dlnls5K3zk6MyIbeNexL9Q0P7ctib0zNg83cpiy5xg4MUQc+Ku49B2yAfqY
cpOsagAkoAZ6fi+9Q/YIobOOUMQndKSJPcessSBiEiRJaNQGgx2yNfEfmazkDtmQ
Zik1GZCWKEaEv4SML3mOnAoHZZHx0FR0XNk7ZLNzYnbIBqoQA2JVIQezpcQBdqzj
eAy/uxMPAXBsKQBdOg12SnnnownNQE70A6l+cQws9IUHj7ydjGkU74EsYcJiuDiC
5wX2+vkdm0blID3hlPRpyO6mDKRJGLYQC8Wmy61D6bsp0/tjwUohDAvDZmDhGLNz
cVmQ1o80QKbi9kCuuDqh3ZRJKC5L+XzZxD2K8wVp6WsAeeXKYuesuCzl84Xa0FCc
L0hL7+ILUK4sNhSXBVAuX9X6Eu2UK6ty9iVwyrd55exLtKxyZbGhuCyAcvmq1pdA
Vvk2r5x9CWSVb/PK1JfIXRAXUHHMyGN6vb2900J9ukIW5NhDdstYEnQaxmfvplxW
DQBQOg1yF8S2uGtJ9JKfMXcNW6wQv2Iy/IeGu4YdEVawS6KCfTMl5dklkVTU70SI
ATM8iiAU5UEcM4pS53aRoCgFiig+W+GKmEaEGNRYRSwkQgxq7G7LoSwJgGo7qVbh
TYanEyEGNVYRYUSIQY3dbXkGEWKgWo9QuyLU1yPCiRCDGqgIcrdl+DhF7FeHqXO3
5TuCXoIXIjdurqCZ4JyI/JQnwpOg3ZZLgl6zDrstv6xF6kwoInUmFJE6qzpr1pXb
JnYB1e+osT3hUxISdemXg33VjhOF8KNqi3nnRUP442rb8R6KHPhutTGsfTm2lGyv
qdWKKkKNkNavqrsI3MDIxeeJmPwtJeEjrwbMtQEBAubEzJth1I6SYgzKIesgu6Nk
6XtJqrK/AKRUtJckbLJ8RzBI21Lkid9xLHHLgTsO+NVvk+WFP8R6YrVSBfO5C0Un
tTSF3lxfUZKWkdCF6wp3Jw1Kv57foF8NzDMWr8hCPD34qfijZT6X8SH+JB7vS/ma
+HPZm8v4EJ+Ex0P54Bvh8S5cxod4Wf2quslyYwWbLMMfHNVqk+VL2vtE+/gHar/W
vitagt86NXiZomD+VPYG9ayNV5RodAlRgFohv9EB5Wv0htpko5e2yTKQsxC78EbQ
KdEmy9Vok2X4y7GKb7L8slY//MEIw0lwdbRzanXXbo5rpOpuWiXGSCos+EebfgzK
A1wRDciv5KZVkLo8ei8L1Vvvxhipd3r6WmkoW++QWl1618GmadsKt/IsRevxAWAE
TyiK1HYUruY1F1U96i8jvAa2GDnfhXyVB0TJ0YfdCeffk4endCVD77rqapVF/QWE
kDr4PYmDPceCCOqvoRpE6xQ3G1B/yaaXR/0lpk9yIkpcBTkoJe+K8sESowGh0vo5
ZMUogQQ56YZRH4yV4RsFXIf03EuAtDwN6jT40scEKSSVhBWfKMEImi8J+InwPYT0
Zai/EpkyGeovADMsKY8pSNW8BBhTuMWzFX7hW4pyeCOEyXyh6BHPUZjNr4qm0Biv
gZ2MKdgWFh8WQ3pSUklTYK93BLS6Yk2YAkwuU9UUjOmTFWUKssWS+B6mEC9FCAk+
rqxiU6DjqoYpaGKvtRcKFvEthHq8PQJfvkDYgndJ4Mr/IIDBnawpsG9C0mZAO/Wj
Pe4ms8LSn2ShFuxPsvcjxBhZd7r+dF0hTPemB8QoFGL08E6kAx+8Zc748ks7cxxP
s4f1Vfh+uUauZemQeT1J4Z7WidG5LNDQTtOZrLNZ0Ej7k84IncUCSCv79smGdFtR
TvIYN53TuDms0mH8y3h+EA8+fOtKw+Mm6TD+Zioe/Ia4/wmPG67D+IuoePBJHS2h
q4F9+9snrSR5236Sryc0yNeT9hjMOsVzjqDjzYlyBkwd4z/FV+wgbmdhbWX3s7hV
QJBZW8wag35A9gTZTUHJv/t41AMAPvuRdxl57y3f+nIKgOuBEiAllAj3Jfq/A5Ap
LMLql+StBB7g1hjBW4n5424M7rwRg6VyMtURpV2rMvqobDIICAjqB2KwRECoOCAG
SySDZJBMSRnEYIlkkIyqMojBEskgGVVlEIMlAoKqQAyWCAiqAjFYIiCoCsRgiYCg
Kr4vg+VYDslg6Y77YkOCwTL2ZkBdK9GVkR524oQerbmHD+UnPLvI9bvUws8pcuWQ
LdvdHg061OfxPZ/hvUcJ61icwmpFO6ZGatpGneK+bHLBblRgysiXu6Nj4u3cni/L
Dfz1a9Nb496G5329wt/01aL7Nv2swO5FjnvcXkXvG+h5IyPWc5awqOU78dGoAcYm
ozd1404oXNawZfrcO0edDFPcemUUXJtkl/XeINds0Pbkp++1Df+bZ6H/cJtLnQVT
+7i26OuhcTtBIDp8/q5w2GD71rFG9dOn/PXTjgfHBQ97jb+QJjJz1hIN3DqyhUa/
5Mf2JqtmmDwM9gyZEbgrpG3iy/Or+n9qlJZs48wJ2JmdrT3aq3BKB8vMjJxbm0PS
2pldO3/KYLp+XHJqbNS6ppMW77iwN8Cl/bOUbTs+TXTdHtK0Z+sGZuO9h76c0dRx
Xi9N70V/ONsl2gss6qYuu+3yyrCbw9Hp2vsyJkUNb7dqhq/nhcIdpjYnbS63iRoU
+fn2Bl3DRSbTc4Pfaby5lDku4ejfD5I27N0e2snur9C8zAcHbS0Md8cNCdT9bUC2
e/qb109PvfkvKb9JREjD9bctd0R+Oebc/cnE03s9LO9mGu9K3zs53mB+/LbkNx2W
NPmY49Psks25vpf37+rvvi6t/o13907cfJfZKFwwJ0c4yco1Pa/3YLP3URebXTEL
/dNpulvSrnv/G3Hcp+XijWdm9EnoqXmfv9HP/lH+wBsNf8qwnNfLPcf+t+2dz566
1dd5f1SLiysfrPJq4upd16ufXaOjWdmBR/rqBkxY4zPAdM65m47Xelw5YLZizsbA
7TF98lKTOhWMXnXVbefRvyf4mN11WX/pbJfYEw3Z7IswWdMK993GBIwPEk/0Dwzu
JHYdExDQ1v03v+AA3xBxsG9QMNAyKkfPCCM2ZWYQ1QBIQA2gI0BJekYdQkey9Iww
ga1sesY/qPls35eeMSuihwb5ZQhioNsQ3YUSr6mgNUe3SWkA3dHIxjprMBNL6RP0
04D9VKjJAB2VhnewKLJYgwhlg9Yk0+8gglavdP+r6WD3O/IemT2T9pl+V0bnRKAg
2+9QHysdyt3vkAYVg9YkVwwT8Bm1MmMbLfFgTD26zJIwNNaw8JqmsXZgyXRhHZek
sWZLAehRGg12Snnny6KxBkYFWCAij0KaRuk01u2I3GZiEdisEjlQKTw9JcVRgEQv
VpikDbMicpiNzcEi5dZBMY01OU6di83D5mMVRxldGXNCNNYkFJelfL6sdVlK5AvS
0tcA8sqVxc5ZcVnK5wu1oaE4X5CWpk8GKFcWG4rLAiiXr2p9iXbKlVU5+xI45du8
cvYlWla5sthQXBZAuXxV60sgq3ybV86+BLLKt3ll6kskveRMKq7y0Vg7SNFYd/mx
NNYRRIhBjWVvnkWEGNRYRcwmQsUoHnInEuYgy9XLNp0+kuJDClWYxnoOSwKgGkVt
FWZvjiRCDGqsIuYSIQY1lsaaXR2Aaj1C7YpQX4+YT4QY1EBFkDTWMBUBLhOgLhrr
5hSNdW9EY40x1yEPbP61WxT/Wg7Fv/aoivKv/YTXwAEj/9BmII9/jQRfQnienhI+
Vhb/GqCi+NcY44socRXkXztlfcJjidEo67s8ZCX91zDIg6MLBpME4yov6RTl2MfF
jhKjwokSrNKTTgH/2i2Kfy2H4l97VEX515rgNegiYwry+NdIMF/TS5oCe7UOjYri
X2tefDaiYkxBtlgS38MU4uXwr9EOxJi4qmAKNWlzg5nUaITuPUy/Uh89O58YqQD9
PYxUqjf9/ewfoF8OlqRtKNjEbyzM1+4imMEvENTiDRX48p/iJl7MhP4NVNntNLBW
ZAnqhLR+v5WLjj5Hc9HNpujvS2NCt8TgTZsL918K5sS9kpheV34edHVTZMPOIPtE
Ifz42mLeXdEQflhtO16myIHvU5vhQf+WxrXWrIqN+4QiGkzE5POgw//mBClgBBWN
VY2dQTjYZa083SPcIP03WoZ6y7n99Tlca71Qrq1++Vv3Ml6RIDw9+Hn4pR7hMj7E
v8Hj+1O+oR6GLecyPsRzcB/KB98ajw9l+RBfWutGapa3dftSpisqkm+6MKdBXusO
r/Sti/YwULyHAcw3QXsYFLvKwaXfDHcweQimM5X2pgFgv2lAfiW59CF1efReFqq3
3ptjpN7hCsuvd0hd8XpH3LcVJFMdUdq1KqOPyiaDgICgfiDuWwSEigPivkUySAbJ
lJRB3LdIBsmoKoO4b5EMklFVBnHfIiCoCsR9i4CgKhD3LQKCqkDctwgIquL7ct86
c0ju2064v7UBwX27+maAoZXoiuuKvNsdODZ+m4+8Fg4+7u6Ry/HvFi3pts1tRV2P
RGOLRzYfPHQ+NgrN1Jz4at3HJi96ftD1WZI84mAGxl0V1kgnxCEj9UZB1zjfnrk3
cjY2iwx/2+z51PeedffWGvcibGPk0s7eTxLncocUdJlj9MAm8oPxJw3Na+Pz2lj1
vz83qZZTpxS3fhnH/mfXOD9k8eeVZsmNjp2OurxxYH3ehPxILa9TW/bWsdiDvdov
EC09/6++eUJ9l2291oScHnTFb6p9t0evJnQwNO65UKvZokNtTBJfx31ZsPVA/4ur
+5nvyG7rm1znscGmsGtn64R7bDF5Oq+w0G9Bi8wv0SMLkt9aNjvJX13P12/UdQdh
fsbGxxfSbR8/e33IcrSzrdHa6QPT8xsNT/+9ldtxyXCjg52aFjRs3SGuoUvk4HMa
4Xue1nn/H99hlkvznclTb2F5nf+xEv56IFDP367gydb0fZfDLk1aNKCpxY4580wf
eIw4HNrpWESo1cnJuViY/oot3nc8lyYkD2ozN2rm5kENs53MJ6+ffUVwyNJmw2uH
8BNOU08UvB5ksstAz7N52N63p9b2sPL+eHmaVYfwi1/npifkZJm033OxU4xo0FD3
RcPXXzK9uP6lz86x0RPqPjINTSx6aHohLbvnwx5Xsvqt+7Pw6DBe9pB1w3KzTode
P8V7021P6FAHYNq1yrUYujdOv3B36NHPuzU89U03vv7U4PyMX4zHvOEeXrZ1beBg
7LCdVtvTQ4+OWRK/sWVds8Jg6xWTAgY9SfCf29Rnbt2c8S0b5wWz6W118B/0Mbu2
P5fBWquPKTf3pwZAAmoAHQEY1lprPaFIQOloGmaNOwA58bEjBqy1ZBhQkrV2JJ+t
W/o/QHlgzpEztJg00FR0XNmstSTIswwbG6xTNSC417gETxeNPqxjZ9axC+u4L+s4
HtuJkfcveMdl5wSga0iDnbu88+wS5Z1n10LeeXbN5J2PJibbQU3pezXb1S8+2xR3
Ygzmy5JTLJtj8pniinlaZMK6GJ9YcdyZyHkVthhbQuVwuM5PUzesekBJlpUDuTIf
Fo9iWAwWhS2TW4fSmeLoHH4mcvgDi8aWYwwrm26ZPY96Uo3OeFU4U1aPcEr5nNgo
f07SKaUBMogpjoTispTPl14eD1CcL0hLXwPIK1cWO2fFZSmfL9SGhuJ8QVqaoQyg
XFlsKC4LoFy+qvUl2ilXVuXsS+CUb/PK2ZdoWeXKYkNxWQDl8lWtL4Gs8m1eOfsS
yCrf5pWpL5EMLqukzr3rmnpq7bShHbp3hRA59iiN7uo2IcMGmylOEaB0GkozuHwL
pw8lKQNpBhdSEYtZEoCSwyE+rwZQ2ZCKWEKEGNRYRcQQIQbvuvY3enVoVj8XotvL
0l2RprF2DeCqjGlUYSa4KJYEQDWWpypMgLaMCDGosYoAFhY2aiwTXDQRYqBaj1C7
ItTXI5YTIQY1UBEkExwMcmGZM0BdTHAW3DsCC33gr8kVCPRJJjhrPcQEJ4uSnD+k
zoQiUmdCEamz6sZJs4rqd/CnEAB8SqJcq+KV0S8HM+IvF3UXzq7dlX9E1EQ4qrY7
/x+RtrBXbYzhpPH8Bv1qYJ5EAWqFtH5VpS1JVEBbAh9xNcCgI6hoXN9g3j38goLH
BHj7ilt1sxhiYVZ5GS74WGeK2smz2lM7xfwQM4rVShXM5y4UndTSFHpzfUVJWkZC
F64r3KbKaUaxeEUW4unBT8WfMfO5jA/xJ/F4X8rXxB/Q3lzGh/gkPB7KB98Ij3fh
Mj7Ey+pXVX6YxhQ/TKsi+fww8E+GBlBVRNApzQniil7+UwIn+wZ5+4Ip+QUE+wYE
+QWHVHqj4mDH+YaCrYLGwhR+F0GEoECQyx8q+E3wVMBq9G+gjamefF4diUaXpY2h
/n6Wbl59TFlGL/U3L2IFUswKBP8tymtexAqkRkg3sjQ7jQlGMr40pQVKAVwRDciv
JDsNpC6P3stC9dZ7C4zUu5gWKAVl612MIb2XhCK9wz0G9G5MC5SCsvUOqZHe2VCk
95YYqfdmtEApKFvvkBrpnQ1FeodhIugdpiWVhbL1DqnVpXcONl93gOCwnkS4WzdY
EK3XWHhBd4kgRE8LviTSL5wSRu9sSOscHA5JsYDaIK13VcfG7JYjh0tAf64Br6QR
tKw58YLaz8GmLfF2S5wkfGaoRA+PiJc2/Lzq418mV1nQTaiDm46tcKiekT75mTJf
r462o9BZr5Z+1WOeh67eFwPmeabhAPWkzPldV0HEYNt/nz3uSod1MZp5foPWFGLN
LAB8CIODa9fGDWkawTz/DoPOr1Hcp4F5XhbymOfBqElElLgK8vsFOYCWDxCTsk5I
pF0yqhiQFV0paGg26ILp+oMv7wLYYE8UBOBKicUVRNeoCI4hDhyE4bqo80XkZFVw
EnCJZBLwJd2YY8KXkD5kwDDP83nDNWkr/Y9THlNgq1oa0qbwUY80hduUKbzSq3qm
AE9bFzmmYC9jCo1PvZ5S69MTOaawV/sAsUwcAD6EwcG1cyvAFGBcQaKCTKG0JGxT
YOyPBF2wKqaAK+UMrqBiU4BjiAMHYbgu6nwFmAKmRZtCntpNYQD1VDDXJ02hRxV8
KhhjMMdd1hRS2QEMur7Xs6uuw4QP5ZhCvus9gjUBAD6EwcG1a1WAKcCrDYkKMgW5
z3xM/aaAK2UmrqBiU4BjiAMHYbgu6nwFmMIrDdoUHqvdFIZTpmBDmYJrFTQFMQZL
P2RN4Z6MKUgvX2BM4Sq2qgSZCITBwbVrVoApwNcVEhVkCmS1ZcE2BTErHkAXrIop
4EqR2ZoH4sBBGK6LOl8BplCn+KngrqVuU3hNDZAuUQOklCo4QGqKwTomWVPoRV5E
Md51PeZ/ZsS4qFQ5phDFh5wYQBgcXDunAkzBpPhsBZmC1LUVg20K0l2HLlgVU8CV
wq4RcQxxdDx1XZSMqqbwf8XvComaFW8KiHe9gmSqI0q7VmX0UdlkEBAQ1A/Eu46A
UHFAvOtIBskgmZIyiHcdySAZVWUQ7zqSQTKqyiDedQQEVYF41xEQVAXiXUdAUBWI
dx0BQVV8X971NxySd/0h7p9uRfKuOwQmSRpesTw0mD/LY+Coi48uchb8dNWrj6Gb
cYtmzZwSV9pdPWwz6e2rMMn57l00vLr1dfpp2Jinmvva7W/XM0z46+WJsQeXtcx7
cHjOxOiwVa2//JM/PSuuKOfrlotLX26f0dj44/tO3f/VaLLx1/z8tY9eRL84fD1y
9f9aj7jtWTQ+89xnQXffW6FXLXbqps/8MOm3ON7ppT1u3xT/Jsw21L7U/GHQhFit
TS6Z71uvLbppeP+1++/m80cXJQ3Y9IcHNniwxtc2tabEtR0X8O+4txO89PN1t9jf
n/L52m8HH+hy63WN6D/8vxMvnu58mSXelGkVvrSJv2a6wRoer/P1owdGfv5783TX
5Mk7z6fmLr+/eLzW7unXu2ouq/Wy/6ecsAv7Ws19OSsvIzMkIyA3PN8s687OTNu9
C9uNlUwbNXtdizvb3aNTW9SP/Wjld2f/0uHzb/KuGTh2u2Bd4IUlmz/Ku/PT1N1a
YwJHDYxwXOHWd73jg+uCe0bZv4/MPXItZ7J9wc6bASu6zb2a415rtsvOlg+8EvJt
T/Ns224PFd1IiMtySJk+acedN365XpK5oalBuNDwf+3/75aDdsC+c5r5lxwXPzwW
EHIopd38c6F70/k6NpZcI63FDtu3PTA6tMo+Mdwt+uvYqLUrxwrPnHgjyMB/LWef
OA+/xfF73539a19h3NoT5wW5Hd0/DCVyHjdzvc+cK/0Lrv9vX/szn0e2av9sse4W
r+WL7OusbWI48szPDfwPFNyxXTL7zXF9l8jL23PCcx+cxByOLvDq/ktuuGjt2S5F
mpfuHU96/fcNC3PrPi3mDXPqO3CkcXrMop7vvUyD5/W1SHPs9WirZ8dPh/I+ufy6
TtJqj+v2pNfWHWcN69Ix+qrfuovrj0Z0/PRvwfvWB13FK++Zrrjq02idxLzpur+f
H3L1+meEZF2YY+CLebsmcDYd6vizXcG+Ja7imGWuPpMfmlq9bBvvOmrjtBUppiLn
8XW1rK971l3wwrvuml/um256HxjYzXgYmxdegNuICPcdAyeGiAN/FSN+eCUhATWA
jgAMP7yzjlAkJHSkiT3HrLEgYk4hua6rKwb88Jr4j0xWkh8e0iylZtXREsWI8JeQ
8SXPkTPJoCwyHpqKjiubH56dE8MPD3UxIFakcbDelDjAiXUcT4Sg74BjSwHo0mmw
U8o7H01oBnKi7+f1i2NMMHL6rzz+cxrFzOkSJiyGi8NrBrntwlbjTw4yB3o+//UC
t6SFRdl0SgqyHOxORA4J2Dpsvdw6lM7BTrPqdSdy2IC39EaM4TsvC9L6kQbIVBxz
esXVCXGwk1BclvL5EqtmKSjOF6SlrwHklSuLnbPispTPF2pDQ3G+IC3N/Q1Qriw2
FJcFUC5f1foS7ZQrq3L2JXDKt3nl7Eu0rHJlsaG4LIBy+arWl0BW+TavnH0JZJVv
88rUl0ju1F1UHDPymF5vb++0UB8Y3lFjD1miaRJ0GsZnc7CXVQMAlE6D5E5ti8Gy
WeglP2PuGr2xQvyKyfAfGu4aTkRYAbeqArZdSXm4VUlFrSZCDJjhUQShKA/imFGU
OklmQVEKFFF8tsIVsYYIMaixikggQgwqlqOdsjy5kFUEQIEiFJhGCdphSlIG8hWx
jiUBUI1/uQpTk68nQgxqrCI2ECEGNZajPY4IMVCtR6hdEerrERuJEIMaqAiSox0u
kWC5xNTL0d5LQHK0NxOQHO3OOoijXRb04m+So53UmVBE6kwoInVWdRZ/K0cuvYvq
d/QIA3xKolxEXMrol4MVaq8WTecvqN2Md0rkzvep3Yl3V9SV37c2hrUvBxFte02t
VlQRaoS0flXlUruMlU1ECx95NWCqSiIVjesbD2HDKB5aMQblkHWQ5aEtnYFWFZo1
SKmIgbYmUbMn/BDrQdTsiqnZ4Q+OakXNfkV7k+ggf0vtDO1Loij+zNqavBTRVP5v
7G0tWPSTSjS6hChArZDf6IDyNbqudtnU7F2JRueVaHQYeCFqdv3qQM0OfzkiavZi
xyETqBnSjSxN3WuGu54Y+Y92WZ+p4IpoQH4lqXshdXn0Xhaqt95bY6TeW2Cq6B1S
q0vvOtg0bTvhVp6laL32L8IInlAUqd1DuJrXXFT1OLRM8BrAgBxsnHyVB0TJ0Uft
k93HOOWmFM/E0NWiObTkAZgVdfB7Egd7jgURHFpDNYjWKW424NCSTS+PQwsskQAn
osRVkINS8q4oHywxGhAqrZ9DViW/RtCTbhj1wVgZZOA6pKcuAqTlaVCnwZc+JtgV
qSSs+EQJRvBlScBPhO8hpC/DoZXIlMlwaAGYYUl5TEGq5iXAmMItnr3wC99SlMMb
LUzmC0WPeL2F2fyqaAot8BrA6LqkKdgWFh8Wg56UNKrPh19SX0qbAnu5IKDVFWvC
FGBymaqmADdHAhVlCrLFkvgephAvxawIPq6sYlOg46qGKWhir7UXChbxLYR6vD0C
X75A2IJ3SeDK/yCAwZ2sKbA1L20GtFM/+uBuMiss/UkWasH+JHs/QoyRN1C6/nRd
2XEPiFEoxOjhlqQDX4NlzvjySztzHE+zh9X57pdr5FqWDpnXkxTuaZ0YncsCDe00
nck6mwWNtD/peOgsEkBa2bdPNqTbinKSx7jpnMbNYZUO41/G84N48OFbVxoeN0mH
8TdT8eA3xP1PeNxwHcaH+kA8+KSWl9DVwL797ZNWkrzND8jXExrk60kfDGad4jlH
0PHmRDkDpo7xn+IrdhC3s7C2bt9O3CogyKwtZo1BDcmeILs3Avl3H496AMBnP/JW
K++95VtfTgH0HQ5SQolwX6L/OwCZwiKsPiKArDCZ6ojSrlUZfVQ2GQQEBPUDEUAi
IFQcEAEkkkEySKakDCKARDJIRlUZRACJZJCMqjKIABIBQVUgAkgEBFWBCCAREFQF
IoBEQFAV35cAciyHJIB0x32xIUEAGXszoK6V6MpIDztxQo/W3MOH8hOeXeT6XWrh
5xS5csiW7W6PBh3q8/iez/Deo4R1LE5htaIdUyM1baNOcV82uWA3KjBl5Mvd0THx
dm7Pl+UG/vq16a1xb8Pzvl7hb/pq0X2bflZg9yLHPW6vovcN9LyREes5S1jU8p34
aNQAY5PRm7pxJxQua9gyfe6do06GKW69MgquTbLLem+QazZoe/LT99qG/82z0H+4
zaXOgql9XFv09dC4nSAQHT5/VzhssH3rWKP66VP++mnHg+OCh73GX0gTmTlriQZu
HdlCo1/yY3uTVTNMHgZ7hswI3BXSNvHl+VX9PzVKS7Zx5gTszM7WHu1VOKWDZWZG
zq3NIWntzK6dP2UwXT8uOTU2al3TSYt3XNgb4NL+Wcq2HZ8mum4PadqzdQOz8d5D
X85o6jivl6b3oj+c7RLtBRZ1U5fddnll2M3h6HTtfRmTooa3WzXD1/NC4Q5Tm5M2
l9tEDYr8fHuDruEik+m5we803lzKHJdw9O8HSRv2bg/tZPdXaF7mg4O2Foa744YE
6v42INs9/c3rp6fe/JeU3yQipOH625Y7Ir8cc+7+ZOLpvR6WdzONd6XvnRxvMD9+
W/KbDkuafMzxaXbJ5lzfy/t39Xdfl1b/xrt7J26+y2wULpiTI5xk5Zqe13uw2fuo
i82umIX+6TTdLWnXvf+NOO7TcvHGMzP6JPTUvM/f6Gf/KH/gjYY/ZVjO6+WeY//b
9s5nT93q67w/qsXFlQ9WeTVx9a7r1c+u0dGs7MAjfXUDJqzxGWA659xNx2s9rhww
WzFnY+D2mD55qUmdCkavuuq28+jfE3zM7rqsv3S2S+yJhmz2RSHeQa1w321MwPgg
8UT/wOBOYtcxAQFt3X/zCw7wDREH+wYFAy0jomf8RkhADaAjQEl6Rl1CR7L0jI6Y
InrGP6j5bN+XnjEroocG+WUIYqDbEN2FEq+poDVHt0lpAN3RyMY6a5ScbAqgnwbs
p0JNBuioNLyDRZHFGkQoG7QmmX4HEbR6pftfTQe735H3yOyZtM/0uzI6JwIF2X6H
+ljpUO5+hzSoGLQmuWKYgM+olRnbaIkHY+rRZZaEobGGhQY0jfVAlowb67gkjTVb
CkCP0miwU8o7XxaNNSy4bomVl8a6B5FbPLYJ21wiBzqFo6Q4ikAPVpikDetJ5LAF
f0veJrcOimmsexE5bMd2YDuxiqOMrow5IRprEorLUj5f1rosJfIFaelrAHnlymLn
rLgs5fOF2tBQnC9IS9MnA5Qriw3FZQGUy1e1vkQ75cqqnH0JnPJtXjn7Ei2rXFls
KC4LoFy+qvUlkFW+zStnXwJZ5du8MvUlkl4ynoqrfDTWA6VorN1+LI31JiLEoMay
N28mQgxqrCK2ECEGPSS1CWwizEGWq5dtOrKKkKaxLguyigAoUIQC0yjBzEpJykC+
IrayJACqUdRWYfbmbUSIQY1VxHYixKDG0ljvIEIMVOsRaleE+nrETiLEoAYqgqSx
BgeXCUA01gxordHh70tjDfxrQRT/WizFvzazivKvmeI1GIiRf2gzkMe/RkFCeo4S
PlYW/xqgovjXwHhIRJS4CvKvnbI+4bHEaJT1XR6yos2NBvmvOqM+mB0ExlVe0inK
sY+LHSVGhRMlWKUnnQL+tWiKf+0wxb+2oYryr7XEa+AmYwry+NdIUG+yEd2lTIG9
WodGRfGvQTuRiKgYU5AtlsT3MIV4OfxrtAMxJq4qmEJN2twgnhqN0L2H6Vfqo2fn
Y0Mp+vvQak9/v+UH6JeDJWkbCjbxGwvztbsIZvALBLV4QwW+/Ke4iRczoX8DVXY7
DawVWYI6Ia3fb+Wio8/RXHSzKfr70pjQHTF40+bC/ZeCOXGvJKbXlZ8HXd0U2Rzs
q/Y+UQg/vraYd1c0hB9W246XKXLg+9RmeNC/pXGtNati4z6hiAYTMfk86PC/OUEK
GEFFY1VjZxAOlqeVp5vODdI35Brqnef217fmWuslcG31y9+6eXhFgvD04Ofhl5rO
ZXyIN8T9/pRvqIdh51k+xFvjPlE+7lvj8QksH+JLa91IzfK2Lm26vYrkmy7MaZDX
usMrfeuiPQwU72EA803QHgbFrnJw6cOb+wCMnM5U2psGoPhNCCPzLMmlD6nLo/ey
UL31DtoAvcMUsvLrHVJXvN4R920FyVRHlHatyuijsskgICCoH4j7FgGh4oC4b5EM
kkEyJWUQ9y2SQTKqyiDuWySDZFSVQdy3CAiqAnHfIiCoCsR9i4CgKhD3LQKCqvi+
3LfOHJL7thPub21AcN+uvhlgaCW64roi73YHjo3f5iOvhYOPu3vkcvy7RUu6bXNb
Udcj0djikc0HD52PjUIzNSe+WvexyYueH3R9liSPOJiBcVeFNdIJcchIvVHQNc63
Z+6NnI3NIsPfNns+9b1n3b21xr0I2xi5tLP3k8S53CEFXeYYPbCJ/GD8SUPz2vi8
Nlb9789NquXUKcWtX8ax/9k1zg9Z/HmlWXKjY6ejLm8cWJ83IT9Sy+vUlr11LPZg
r/YLREvP/6tvnlDfZVuvNSGnB13xm2rf7dGrCR0MjXsu1Gq26FAbk8TXcV8WbD3Q
/+LqfuY7stv6Jtd5bLAp7NrZOuEeW0yeziss9FvQIvNL9MiC5LeWzU7yV9fz9Rt1
3UGYn7Hx8YV028fPXh+yHO1sa7R2+sD0/EbD039v5XZcMtzoYKemBQ1bd4hr6BI5
+JxG+J6ndd7/x3eY5dJ8Z/LUW1he53+shL8eCNTztyt4sjV93+WwS5MWDWhqsWPO
PNMHHiMOh3Y6FhFqdXJyLhamv2KL9x3PpQnJg9rMjZq5eVDDbCfzyetnXxEcsrTZ
8Noh/ITT1BMFrweZ7DLQ82wetvftqbU9rLw/Xp5m1SH84te56Qk5WSbt91zsFCMa
NNR90fD1l0wvrn/ps3Ns9IS6j0xDE4seml5Iy+75sMeVrH7r/iw8OoyXPWTdsNys
06HXT/HedNsTOtQBmHatci2G7o3TL9wdevTzbg1PfdONrz81OD/jF+Mxb7iHl21d
GzgYO2yn1fb00KNjlsRvbFnXrDDYesWkgEFPEvznNvWZWzdnfMvGecEkva0NMS0I
+iD0wr5jQgKnBIutMJK2lgYcwmQeCeUzZ2osJKAGWkcdiWGoNjHp6XAxES0btpgX
RpsxrT9IQx/DyyB9DA9j+pjUPHkMDUQfQ6PRx3CboY/JFayQMz3LjFnBCrWrqBWs
Qux20WPOE56VzseidponeCl8Xayh5mZeLhQrkZ3BxwZ9S2Q7TMISUBvIKW1M/1Vm
ajs5y++GznIeOSUW5vkR554w6mGhPFP3mGeELOgpk6DwQYInvD9FH4t2CE7whol0
sWWCzbyJUIlqqPCbOqsphWv/KIX/ybvL2ac7ROc2r5XmEl0NnVc8kWawbiMww2qo
8FTudUrh3B+l8L942oKDuv+IkngegmW6oaIMXnfB77rLq2kPT+Wa8kmF836Uwr/o
p3G0G3TRaVrLRvOZwRu+ba2fNK8ZcKppD7+mE0f1cI0fpfBC/f4CfoOdoma1tgie
GwwWdaq1WHDDwL+a9vArxfdwnR+l8OUGUZwYo346RwyecSYbfeb/Y3CN42FUp5r2
8FRuE+qWwvlxCucLYowuiI4Y/CKYbBQo+segh8DDaH417eGp3AaUwgXfW+ENJTOJ
FCDBrO2Ajwd4VMk1HAgICAgICGwoWsMhLY+AgFA65K/hkJZCQECoOZC/hkNaCgEB
oXTIX8MhLYWAgFA65K/hkJZCQEAoHfLXcEhLISAglA75azikpRAQEEqH/DUc0lII
CAilA9ZwMCs3BvHfYuQqixTcnyQgVln8cUcwu129eS0HD7ZN4Q48LVn2dIPv1BX1
CjDrKTHHt9+off8gb8rQEcHGoQ9uRu4PSv9UcPTW2TEPe/PTrLoH9HtjdvfK0pdz
7aOuH5zQ+9PCFpO6CbPOb611ffbCJn+2DOsyZuFW09u8EfmikU7m3ecH/ZLxXuNr
6BLR5ITMLpEPB760Dvad0T22U/DId5HvJHdXSj6e9LsR877T9O1jLLcM3mS2csPT
zRrm+0WRB3vl5Z/L0T6S8NfAOz99OZ3dxbvHpnrXpra7ufrxUoelhtMvx+0fm9lo
ett43PvvUdzDKUWcRQNaPYKFADYSO2IOCUzVgsneAyYHjvP1Dhb7BfwaKLMcAABa
Y/s1HBJQA60jkhuZ1gupViJeMoGYTwQ6I7eewhHx8OfRbvc0JsBfRwQCiAlEPadN
9J3sN8E3IFjcY0ywLxZIkCc7T/Fv286mrXU763YYmQKKDCA471kp+vTA5YnKkEJQ
hQAig36Bwb5egYHjZUTgq1oAMSeLavqSp8EFYMAxzRTjO7mkDLwMBRCrFPAsggO9
A/1LnodhXgAZQcUvwkww8hKWzsa6znF93OX+Pt8ucEYajHHaSTQjJOxT5YSG5P8B
AAD//wMAmsnfSQ==</Template></GraphPadPrismFile>
