# Supplementary material for: Par protein localization during the early development of Mnemiopsis leidyi suggests different modes of epithelial organization in the metazoa
Source: eLife journal article supplement (doi:10.7554/elife.54927), 2020-07-27
Supplement: fig4-figsupp2-data2 [file elife-54927-fig4-figsupp2-data2-v3.pzfx]

<?xml version="1.0" encoding="UTF-8"?><GraphPadPrismFile PrismXMLVersion="5.00">
<Created>
<OriginalVersion CreatedByProgram="GraphPad Prism" CreatedByVersion="8.4.0.455" Login="root" DateTime="2020-07-08T12:16:23+01:00"></OriginalVersion>
<MostRecentVersion CreatedByProgram="GraphPad Prism" CreatedByVersion="8.4.0.455" Login="root" DateTime="2020-07-08T17:37:04+01:00"></MostRecentVersion>
</Created>
<InfoSequence>
<Ref ID="Info0" Selected="1"></Ref>
</InfoSequence>
<Info ID="Info0">
<Title>Project info 1</Title>
<Notes></Notes>
<Constant><Name>Experiment Date</Name><Value>2020-07-08</Value></Constant>
<Constant><Name>Experiment ID</Name><Value></Value></Constant>
<Constant><Name>Notebook ID</Name><Value></Value></Constant>
<Constant><Name>Project</Name><Value></Value></Constant>
<Constant><Name>Experimenter</Name><Value></Value></Constant>
<Constant><Name>Protocol</Name><Value></Value></Constant>
</Info>

<TableSequence>

<Ref ID="Table0"></Ref>
<Ref ID="Table1"></Ref>
<Ref ID="Table5"></Ref>
<Ref ID="Table6"></Ref>
<Ref ID="Table10"></Ref>
<Ref ID="Table11"></Ref>
<Ref ID="Table15"></Ref>
<Ref ID="Table16" Selected="1"></Ref>
</TableSequence>
<Table ID="Table0" XFormat="numbers" YFormat="replicates" Replicates="1" TableType="XY" EVFormat="AsteriskAfterNumber">
<Title>Par-1 Late</Title>
<RowTitlesColumn Width="32">
<Subcolumn></Subcolumn>
</RowTitlesColumn>
<XColumn Width="77" Subcolumns="1" Decimals="8">
<Title></Title>
<Subcolumn>
<d>0</d>
<d>0.01149514</d>
<d>0.02299029</d>
<d>0.03448112</d>
<d>0.04597627</d>
<d>0.05747141</d>
<d>0.06896656</d>
<d>0.0804617</d>
<d>0.09195254</d>
<d>0.10344768</d>
<d>0.11494283</d>
<d>0.12643797</d>
<d>0.13793312</d>
<d>0.14942395</d>
<d>0.16091909</d>
<d>0.17241424</d>
<d>0.18390938</d>
<d>0.19540453</d>
<d>0.20689536</d>
<d>0.21839051</d>
<d>0.22988565</d>
<d>0.2413808</d>
<d>0.25287594</d>
<d>0.26436678</d>
<d>0.27586192</d>
<d>0.28735707</d>
<d>0.29885221</d>
<d>0.31034736</d>
<d>0.32183819</d>
<d>0.33333333</d>
<d>0.34482848</d>
<d>0.35632362</d>
<d>0.36781877</d>
<d>0.3793096</d>
<d>0.39080475</d>
<d>0.40229989</d>
<d>0.41379504</d>
<d>0.42528587</d>
<d>0.43678101</d>
<d>0.44827616</d>
<d>0.4597713</d>
<d>0.47126645</d>
<d>0.48275728</d>
<d>0.49425243</d>
<d>0.50574757</d>
<d>0.51724272</d>
<d>0.52873786</d>
<d>0.5402287</d>
<d>0.55172384</d>
<d>0.56321899</d>
<d>0.57471413</d>
<d>0.58620928</d>
<d>0.59770011</d>
<d>0.60919525</d>
<d>0.6206904</d>
<d>0.63218554</d>
<d>0.64368069</d>
<d>0.65517152</d>
<d>0.66666667</d>
<d>0.67816181</d>
<d>0.68965696</d>
<d>0.7011521</d>
<d>0.71264293</d>
<d>0.72413808</d>
<d>0.73563322</d>
<d>0.74712837</d>
<d>0.75862351</d>
<d>0.77011435</d>
<d>0.78160949</d>
<d>0.79310464</d>
<d>0.80459978</d>
<d>0.81609493</d>
<d>0.82758576</d>
<d>0.83908091</d>
<d>0.85057605</d>
<d>0.8620712</d>
<d>0.87356634</d>
<d>0.88505717</d>
<d>0.89655232</d>
<d>0.90804746</d>
<d>0.91954261</d>
<d>0.93103775</d>
<d>0.94252859</d>
<d>0.95402373</d>
<d>0.96551888</d>
<d>0.97701402</d>
<d>0.98850917</d>
<d>1</d>
<d>0</d>
<d>0.02325764</d>
<d>0.04651528</d>
<d>0.0697642</d>
<d>0.09302184</d>
<d>0.11627948</d>
<d>0.13953712</d>
<d>0.16279476</d>
<d>0.18604367</d>
<d>0.20930131</d>
<d>0.23255895</d>
<d>0.25581659</d>
<d>0.27907423</d>
<d>0.30232315</d>
<d>0.32558079</d>
<d>0.34883843</d>
<d>0.37209607</d>
<d>0.39535371</d>
<d>0.41860262</d>
<d>0.44186026</d>
<d>0.4651179</d>
<d>0.48837554</d>
<d>0.51163318</d>
<d>0.5348821</d>
<d>0.55813974</d>
<d>0.58139738</d>
<d>0.60465502</d>
<d>0.62791266</d>
<d>0.65116157</d>
<d>0.67441921</d>
<d>0.69767685</d>
<d>0.72093449</d>
<d>0.74419213</d>
<d>0.76744105</d>
<d>0.79069869</d>
<d>0.81395633</d>
<d>0.83721397</d>
<d>0.86046288</d>
<d>0.88372052</d>
<d>0.90697816</d>
<d>0.9302358</d>
<d>0.95349344</d>
<d>0.97674236</d>
<d>1</d>
<d>0</d>
<d>0.03124605</d>
<d>0.06250113</d>
<d>0.09374718</d>
<d>0.12500226</d>
<d>0.15624831</d>
<d>0.18750339</d>
<d>0.21874944</d>
<d>0.25000452</d>
<d>0.28125056</d>
<d>0.31249661</d>
<d>0.34375169</d>
<d>0.37499774</d>
<d>0.40625282</d>
<d>0.43749887</d>
<d>0.46875395</d>
<d>0.5</d>
<d>0.53124605</d>
<d>0.56250113</d>
<d>0.59374718</d>
<d>0.62500226</d>
<d>0.65624831</d>
<d>0.68750339</d>
<d>0.71874944</d>
<d>0.75000452</d>
<d>0.78125056</d>
<d>0.81249661</d>
<d>0.84375169</d>
<d>0.87499774</d>
<d>0.90625282</d>
<d>0.93749887</d>
<d>0.96875395</d>
<d>1</d>
<d>0</d>
<d>0.01666458</d>
<d>0.03333398</d>
<d>0.04999855</d>
<d>0.06666795</d>
<d>0.08333253</d>
<d>0.10000193</d>
<d>0.11666651</d>
<d>0.1333359</d>
<d>0.15000048</d>
<d>0.16666506</d>
<d>0.18333446</d>
<d>0.19999904</d>
<d>0.21666843</d>
<d>0.23333301</d>
<d>0.25000241</d>
<d>0.26666699</d>
<d>0.28333157</d>
<d>0.30000096</d>
<d>0.31666554</d>
<d>0.33333494</d>
<d>0.34999952</d>
<d>0.36666891</d>
<d>0.38333349</d>
<d>0.40000289</d>
<d>0.41666747</d>
<d>0.43333205</d>
<d>0.45000145</d>
<d>0.46666602</d>
<d>0.48333542</d>
<d>0.5</d>
<d>0.5166694</d>
<d>0.53333398</d>
<d>0.55000337</d>
<d>0.56666795</d>
<d>0.58333253</d>
<d>0.60000193</d>
<d>0.61666651</d>
<d>0.6333359</d>
<d>0.65000048</d>
<d>0.66666988</d>
<d>0.68333446</d>
<d>0.70000385</d>
<d>0.71666843</d>
<d>0.73333301</d>
<d>0.75000241</d>
<d>0.76666699</d>
<d>0.78333638</d>
<d>0.80000096</d>
<d>0.81667036</d>
<d>0.83333494</d>
<d>0.84999952</d>
<d>0.86666891</d>
<d>0.88333349</d>
<d>0.90000289</d>
<d>0.91666747</d>
<d>0.93333687</d>
<d>0.95000145</d>
<d>0.96667084</d>
<d>0.98333542</d>
<d>1</d>
<d>0</d>
<d>0.02272902</d>
<d>0.04545803</d>
<d>0.06817852</d>
<d>0.09090754</d>
<d>0.11363656</d>
<d>0.13636557</d>
<d>0.15909459</d>
<d>0.18181508</d>
<d>0.2045441</d>
<d>0.22727311</d>
<d>0.25000213</d>
<d>0.27273115</d>
<d>0.29545164</d>
<d>0.31818066</d>
<d>0.34090967</d>
<d>0.36363869</d>
<d>0.38636771</d>
<d>0.4090882</d>
<d>0.43181721</d>
<d>0.45454623</d>
<d>0.47727525</d>
<d>0.50000426</d>
<d>0.52272475</d>
<d>0.54545377</d>
<d>0.56818279</d>
<d>0.5909118</d>
<d>0.61364082</d>
<d>0.63636131</d>
<d>0.65909033</d>
<d>0.68181934</d>
<d>0.70454836</d>
<d>0.72727738</d>
<d>0.74999787</d>
<d>0.77272689</d>
<d>0.7954559</d>
<d>0.81818492</d>
<d>0.84090541</d>
<d>0.86363443</d>
<d>0.88636344</d>
<d>0.90909246</d>
<d>0.93182148</d>
<d>0.95454197</d>
<d>0.97727098</d>
<d>1</d>
<d>0</d>
<d>0.02325764</d>
<d>0.04651528</d>
<d>0.0697642</d>
<d>0.09302184</d>
<d>0.11627948</d>
<d>0.13953712</d>
<d>0.16279476</d>
<d>0.18604367</d>
<d>0.20930131</d>
<d>0.23255895</d>
<d>0.25581659</d>
<d>0.27907423</d>
<d>0.30232315</d>
<d>0.32558079</d>
<d>0.34883843</d>
<d>0.37209607</d>
<d>0.39535371</d>
<d>0.41860262</d>
<d>0.44186026</d>
<d>0.4651179</d>
<d>0.48837554</d>
<d>0.51163318</d>
<d>0.5348821</d>
<d>0.55813974</d>
<d>0.58139738</d>
<d>0.60465502</d>
<d>0.62791266</d>
<d>0.65116157</d>
<d>0.67441921</d>
<d>0.69767685</d>
<d>0.72093449</d>
<d>0.74419213</d>
<d>0.76744105</d>
<d>0.79069869</d>
<d>0.81395633</d>
<d>0.83721397</d>
<d>0.86046288</d>
<d>0.88372052</d>
<d>0.90697816</d>
<d>0.9302358</d>
<d>0.95349344</d>
<d>0.97674236</d>
<d>1</d>
</Subcolumn>
</XColumn>
<XAdvancedColumn Version="1" Width="77" Decimals="8" Subcolumns="1">
<Title></Title>
<Subcolumn>
<d>0</d>
<d>0.01149514</d>
<d>0.02299029</d>
<d>0.03448112</d>
<d>0.04597627</d>
<d>0.05747141</d>
<d>0.06896656</d>
<d>0.0804617</d>
<d>0.09195254</d>
<d>0.10344768</d>
<d>0.11494283</d>
<d>0.12643797</d>
<d>0.13793312</d>
<d>0.14942395</d>
<d>0.16091909</d>
<d>0.17241424</d>
<d>0.18390938</d>
<d>0.19540453</d>
<d>0.20689536</d>
<d>0.21839051</d>
<d>0.22988565</d>
<d>0.2413808</d>
<d>0.25287594</d>
<d>0.26436678</d>
<d>0.27586192</d>
<d>0.28735707</d>
<d>0.29885221</d>
<d>0.31034736</d>
<d>0.32183819</d>
<d>0.33333333</d>
<d>0.34482848</d>
<d>0.35632362</d>
<d>0.36781877</d>
<d>0.3793096</d>
<d>0.39080475</d>
<d>0.40229989</d>
<d>0.41379504</d>
<d>0.42528587</d>
<d>0.43678101</d>
<d>0.44827616</d>
<d>0.4597713</d>
<d>0.47126645</d>
<d>0.48275728</d>
<d>0.49425243</d>
<d>0.50574757</d>
<d>0.51724272</d>
<d>0.52873786</d>
<d>0.5402287</d>
<d>0.55172384</d>
<d>0.56321899</d>
<d>0.57471413</d>
<d>0.58620928</d>
<d>0.59770011</d>
<d>0.60919525</d>
<d>0.6206904</d>
<d>0.63218554</d>
<d>0.64368069</d>
<d>0.65517152</d>
<d>0.66666667</d>
<d>0.67816181</d>
<d>0.68965696</d>
<d>0.7011521</d>
<d>0.71264293</d>
<d>0.72413808</d>
<d>0.73563322</d>
<d>0.74712837</d>
<d>0.75862351</d>
<d>0.77011435</d>
<d>0.78160949</d>
<d>0.79310464</d>
<d>0.80459978</d>
<d>0.81609493</d>
<d>0.82758576</d>
<d>0.83908091</d>
<d>0.85057605</d>
<d>0.8620712</d>
<d>0.87356634</d>
<d>0.88505717</d>
<d>0.89655232</d>
<d>0.90804746</d>
<d>0.91954261</d>
<d>0.93103775</d>
<d>0.94252859</d>
<d>0.95402373</d>
<d>0.96551888</d>
<d>0.97701402</d>
<d>0.98850917</d>
<d>1</d>
<d>0</d>
<d>0.02325764</d>
<d>0.04651528</d>
<d>0.0697642</d>
<d>0.09302184</d>
<d>0.11627948</d>
<d>0.13953712</d>
<d>0.16279476</d>
<d>0.18604367</d>
<d>0.20930131</d>
<d>0.23255895</d>
<d>0.25581659</d>
<d>0.27907423</d>
<d>0.30232315</d>
<d>0.32558079</d>
<d>0.34883843</d>
<d>0.37209607</d>
<d>0.39535371</d>
<d>0.41860262</d>
<d>0.44186026</d>
<d>0.4651179</d>
<d>0.48837554</d>
<d>0.51163318</d>
<d>0.5348821</d>
<d>0.55813974</d>
<d>0.58139738</d>
<d>0.60465502</d>
<d>0.62791266</d>
<d>0.65116157</d>
<d>0.67441921</d>
<d>0.69767685</d>
<d>0.72093449</d>
<d>0.74419213</d>
<d>0.76744105</d>
<d>0.79069869</d>
<d>0.81395633</d>
<d>0.83721397</d>
<d>0.86046288</d>
<d>0.88372052</d>
<d>0.90697816</d>
<d>0.9302358</d>
<d>0.95349344</d>
<d>0.97674236</d>
<d>1</d>
<d>0</d>
<d>0.03124605</d>
<d>0.06250113</d>
<d>0.09374718</d>
<d>0.12500226</d>
<d>0.15624831</d>
<d>0.18750339</d>
<d>0.21874944</d>
<d>0.25000452</d>
<d>0.28125056</d>
<d>0.31249661</d>
<d>0.34375169</d>
<d>0.37499774</d>
<d>0.40625282</d>
<d>0.43749887</d>
<d>0.46875395</d>
<d>0.5</d>
<d>0.53124605</d>
<d>0.56250113</d>
<d>0.59374718</d>
<d>0.62500226</d>
<d>0.65624831</d>
<d>0.68750339</d>
<d>0.71874944</d>
<d>0.75000452</d>
<d>0.78125056</d>
<d>0.81249661</d>
<d>0.84375169</d>
<d>0.87499774</d>
<d>0.90625282</d>
<d>0.93749887</d>
<d>0.96875395</d>
<d>1</d>
<d>0</d>
<d>0.01666458</d>
<d>0.03333398</d>
<d>0.04999855</d>
<d>0.06666795</d>
<d>0.08333253</d>
<d>0.10000193</d>
<d>0.11666651</d>
<d>0.1333359</d>
<d>0.15000048</d>
<d>0.16666506</d>
<d>0.18333446</d>
<d>0.19999904</d>
<d>0.21666843</d>
<d>0.23333301</d>
<d>0.25000241</d>
<d>0.26666699</d>
<d>0.28333157</d>
<d>0.30000096</d>
<d>0.31666554</d>
<d>0.33333494</d>
<d>0.34999952</d>
<d>0.36666891</d>
<d>0.38333349</d>
<d>0.40000289</d>
<d>0.41666747</d>
<d>0.43333205</d>
<d>0.45000145</d>
<d>0.46666602</d>
<d>0.48333542</d>
<d>0.5</d>
<d>0.5166694</d>
<d>0.53333398</d>
<d>0.55000337</d>
<d>0.56666795</d>
<d>0.58333253</d>
<d>0.60000193</d>
<d>0.61666651</d>
<d>0.6333359</d>
<d>0.65000048</d>
<d>0.66666988</d>
<d>0.68333446</d>
<d>0.70000385</d>
<d>0.71666843</d>
<d>0.73333301</d>
<d>0.75000241</d>
<d>0.76666699</d>
<d>0.78333638</d>
<d>0.80000096</d>
<d>0.81667036</d>
<d>0.83333494</d>
<d>0.84999952</d>
<d>0.86666891</d>
<d>0.88333349</d>
<d>0.90000289</d>
<d>0.91666747</d>
<d>0.93333687</d>
<d>0.95000145</d>
<d>0.96667084</d>
<d>0.98333542</d>
<d>1</d>
<d>0</d>
<d>0.02272902</d>
<d>0.04545803</d>
<d>0.06817852</d>
<d>0.09090754</d>
<d>0.11363656</d>
<d>0.13636557</d>
<d>0.15909459</d>
<d>0.18181508</d>
<d>0.2045441</d>
<d>0.22727311</d>
<d>0.25000213</d>
<d>0.27273115</d>
<d>0.29545164</d>
<d>0.31818066</d>
<d>0.34090967</d>
<d>0.36363869</d>
<d>0.38636771</d>
<d>0.4090882</d>
<d>0.43181721</d>
<d>0.45454623</d>
<d>0.47727525</d>
<d>0.50000426</d>
<d>0.52272475</d>
<d>0.54545377</d>
<d>0.56818279</d>
<d>0.5909118</d>
<d>0.61364082</d>
<d>0.63636131</d>
<d>0.65909033</d>
<d>0.68181934</d>
<d>0.70454836</d>
<d>0.72727738</d>
<d>0.74999787</d>
<d>0.77272689</d>
<d>0.7954559</d>
<d>0.81818492</d>
<d>0.84090541</d>
<d>0.86363443</d>
<d>0.88636344</d>
<d>0.90909246</d>
<d>0.93182148</d>
<d>0.95454197</d>
<d>0.97727098</d>
<d>1</d>
<d>0</d>
<d>0.02325764</d>
<d>0.04651528</d>
<d>0.0697642</d>
<d>0.09302184</d>
<d>0.11627948</d>
<d>0.13953712</d>
<d>0.16279476</d>
<d>0.18604367</d>
<d>0.20930131</d>
<d>0.23255895</d>
<d>0.25581659</d>
<d>0.27907423</d>
<d>0.30232315</d>
<d>0.32558079</d>
<d>0.34883843</d>
<d>0.37209607</d>
<d>0.39535371</d>
<d>0.41860262</d>
<d>0.44186026</d>
<d>0.4651179</d>
<d>0.48837554</d>
<d>0.51163318</d>
<d>0.5348821</d>
<d>0.55813974</d>
<d>0.58139738</d>
<d>0.60465502</d>
<d>0.62791266</d>
<d>0.65116157</d>
<d>0.67441921</d>
<d>0.69767685</d>
<d>0.72093449</d>
<d>0.74419213</d>
<d>0.76744105</d>
<d>0.79069869</d>
<d>0.81395633</d>
<d>0.83721397</d>
<d>0.86046288</d>
<d>0.88372052</d>
<d>0.90697816</d>
<d>0.9302358</d>
<d>0.95349344</d>
<d>0.97674236</d>
<d>1</d>
</Subcolumn>
</XAdvancedColumn>
<YColumn Width="81" Decimals="8" Subcolumns="1">
<Title></Title>
<Subcolumn>
<d>0.81843551</d>
<d>0.86778443</d>
<d>0.88082122</d>
<d>0.82867788</d>
<d>0.7811919</d>
<d>0.78491779</d>
<d>0.76815893</d>
<d>0.76815893</d>
<d>0.72346355</d>
<d>0.75232773</d>
<d>0.76443304</d>
<d>0.79143428</d>
<d>0.79236575</d>
<d>0.86219942</d>
<d>0.86313089</d>
<d>0.85288852</d>
<d>0.88361182</d>
<d>0.8687159</d>
<d>0.8500941</d>
<d>0.92364984</d>
<d>0.86592149</d>
<d>0.93948105</d>
<d>0.8910636</d>
<d>0.86778443</d>
<d>0.86964738</d>
<d>0.96461934</d>
<d>0.98975763</d>
<d>0.97765613</d>
<d>1</d>
<d>0.90409657</d>
<d>0.9189963</d>
<d>0.95437696</d>
<d>0.92737573</d>
<d>0.86964738</d>
<d>0.93389222</d>
<d>0.86033648</d>
<d>0.94599753</d>
<d>0.9217869</d>
<d>0.91620189</d>
<d>0.84543674</d>
<d>0.86592149</d>
<d>0.93948105</d>
<d>0.87244179</d>
<d>0.8687159</d>
<d>0.87988975</d>
<d>0.82309287</d>
<d>0.80819314</d>
<d>0.87802681</d>
<d>0.79795076</d>
<d>0.81750404</d>
<d>0.74953331</d>
<d>0.72998385</d>
<d>0.68342553</d>
<d>0.71043058</d>
<d>0.66666667</d>
<d>0.65270222</d>
<d>0.65083928</d>
<d>0.67690904</d>
<d>0.61638627</d>
<d>0.631286</d>
<d>0.6033533</d>
<d>0.60055888</d>
<d>0.6219751</d>
<d>0.64711339</d>
<d>0.65549282</d>
<d>0.61918069</d>
<d>0.61731774</d>
<d>0.6750461</d>
<d>0.65549282</d>
<d>0.66015018</d>
<d>0.6126642</d>
<d>0.65270222</d>
<d>0.64431898</d>
<d>0.64990781</d>
<d>0.64990781</d>
<d>0.65921871</d>
<d>0.60707537</d>
<d>0.64711339</d>
<d>0.54748789</d>
<d>0.53910846</d>
<d>0.50000191</d>
<d>0.50838134</d>
<d>0.45251593</d>
<d>0.52886609</d>
<d>0.48230776</d>
<d>0.43854767</d>
<d>0.48138011</d>
<d>0.45437505</d>
</Subcolumn>
</YColumn>
<YColumn Width="81" Decimals="8" Subcolumns="1">
<Title></Title>
<Subcolumn>
<d></d>
<d></d>
<d></d>
<d></d>
<d></d>
<d></d>
<d></d>
<d></d>
<d></d>
<d></d>
<d></d>
<d></d>
<d></d>
<d></d>
<d></d>
<d></d>
<d></d>
<d></d>
<d></d>
<d></d>
<d></d>
<d></d>
<d></d>
<d></d>
<d></d>
<d></d>
<d></d>
<d></d>
<d></d>
<d></d>
<d></d>
<d></d>
<d></d>
<d></d>
<d></d>
<d></d>
<d></d>
<d></d>
<d></d>
<d></d>
<d></d>
<d></d>
<d></d>
<d></d>
<d></d>
<d></d>
<d></d>
<d></d>
<d></d>
<d></d>
<d></d>
<d></d>
<d></d>
<d></d>
<d></d>
<d></d>
<d></d>
<d></d>
<d></d>
<d></d>
<d></d>
<d></d>
<d></d>
<d></d>
<d></d>
<d></d>
<d></d>
<d></d>
<d></d>
<d></d>
<d></d>
<d></d>
<d></d>
<d></d>
<d></d>
<d></d>
<d></d>
<d></d>
<d></d>
<d></d>
<d></d>
<d></d>
<d></d>
<d></d>
<d></d>
<d></d>
<d></d>
<d></d>
<d>0.74690933</d>
<d>0.79505534</d>
<d>0.82173053</d>
<d>0.86141806</d>
<d>0.96356535</d>
<d>0.93558876</d>
<d>1</d>
<d>0.96031206</d>
<d>0.9512035</d>
<d>0.93688975</d>
<d>0.83864666</d>
<d>0.81717625</d>
<d>0.7085232</d>
<d>0.73324649</d>
<d>0.70917369</d>
<d>0.7059204</d>
<d>0.67924521</d>
<d>0.64216007</d>
<d>0.64736484</d>
<d>0.67599192</d>
<d>0.7059204</d>
<d>0.67143764</d>
<d>0.66558196</d>
<d>0.70396851</d>
<d>0.72934271</d>
<d>0.72869221</d>
<d>0.75992168</d>
<d>0.7807416</d>
<d>0.80676629</d>
<d>0.81717625</d>
<d>0.83669477</d>
<d>0.86922563</d>
<d>0.81912814</d>
<d>0.88614177</d>
<d>0.90370839</d>
<d>0.84775522</d>
<d>0.82563431</d>
<d>0.83864666</d>
<d>0.72348703</d>
<d>0.74235505</d>
<d>0.64736484</d>
<d>0.64671435</d>
<d>0.62068966</d>
<d>0.64150916</d>
</Subcolumn>
</YColumn>
<YColumn Width="81" Decimals="8" Subcolumns="1">
<Title></Title>
<Subcolumn>
<d></d>
<d></d>
<d></d>
<d></d>
<d></d>
<d></d>
<d></d>
<d></d>
<d></d>
<d></d>
<d></d>
<d></d>
<d></d>
<d></d>
<d></d>
<d></d>
<d></d>
<d></d>
<d></d>
<d></d>
<d></d>
<d></d>
<d></d>
<d></d>
<d></d>
<d></d>
<d></d>
<d></d>
<d></d>
<d></d>
<d></d>
<d></d>
<d></d>
<d></d>
<d></d>
<d></d>
<d></d>
<d></d>
<d></d>
<d></d>
<d></d>
<d></d>
<d></d>
<d></d>
<d></d>
<d></d>
<d></d>
<d></d>
<d></d>
<d></d>
<d></d>
<d></d>
<d></d>
<d></d>
<d></d>
<d></d>
<d></d>
<d></d>
<d></d>
<d></d>
<d></d>
<d></d>
<d></d>
<d></d>
<d></d>
<d></d>
<d></d>
<d></d>
<d></d>
<d></d>
<d></d>
<d></d>
<d></d>
<d></d>
<d></d>
<d></d>
<d></d>
<d></d>
<d></d>
<d></d>
<d></d>
<d></d>
<d></d>
<d></d>
<d></d>
<d></d>
<d></d>
<d></d>
<d></d>
<d></d>
<d></d>
<d></d>
<d></d>
<d></d>
<d></d>
<d></d>
<d></d>
<d></d>
<d></d>
<d></d>
<d></d>
<d></d>
<d></d>
<d></d>
<d></d>
<d></d>
<d></d>
<d></d>
<d></d>
<d></d>
<d></d>
<d></d>
<d></d>
<d></d>
<d></d>
<d></d>
<d></d>
<d></d>
<d></d>
<d></d>
<d></d>
<d></d>
<d></d>
<d></d>
<d></d>
<d></d>
<d></d>
<d></d>
<d></d>
<d></d>
<d></d>
<d></d>
<d>0.58029212</d>
<d>0.55584925</d>
<d>0.61474696</d>
<d>0.67976579</d>
<d>0.68921005</d>
<d>0.62096866</d>
<d>0.70303744</d>
<d>0.68651169</d>
<d>0.77100319</d>
<d>0.72025761</d>
<d>0.69564259</d>
<d>0.81481718</d>
<d>0.87104265</d>
<d>1</d>
<d>0.98544821</d>
<d>0.93141624</d>
<d>0.94599705</d>
<d>0.91466611</d>
<d>0.90551684</d>
<d>0.78328604</d>
<d>0.86533838</d>
<d>0.79992495</d>
<d>0.70802409</d>
<d>0.66253595</d>
<d>0.61006207</d>
<d>0.47718775</d>
<d>0.4232525</d>
<d>0.37791718</d>
<d>0.3888257</d>
<d>0.31906105</d>
<d>0.30130991</d>
<d>0.29314714</d>
<d>0.21035589</d>
</Subcolumn>
</YColumn>
<YColumn Width="81" Decimals="8" Subcolumns="1">
<Title></Title>
<Subcolumn>
<d></d>
<d></d>
<d></d>
<d></d>
<d></d>
<d></d>
<d></d>
<d></d>
<d></d>
<d></d>
<d></d>
<d></d>
<d></d>
<d></d>
<d></d>
<d></d>
<d></d>
<d></d>
<d></d>
<d></d>
<d></d>
<d></d>
<d></d>
<d></d>
<d></d>
<d></d>
<d></d>
<d></d>
<d></d>
<d></d>
<d></d>
<d></d>
<d></d>
<d></d>
<d></d>
<d></d>
<d></d>
<d></d>
<d></d>
<d></d>
<d></d>
<d></d>
<d></d>
<d></d>
<d></d>
<d></d>
<d></d>
<d></d>
<d></d>
<d></d>
<d></d>
<d></d>
<d></d>
<d></d>
<d></d>
<d></d>
<d></d>
<d></d>
<d></d>
<d></d>
<d></d>
<d></d>
<d></d>
<d></d>
<d></d>
<d></d>
<d></d>
<d></d>
<d></d>
<d></d>
<d></d>
<d></d>
<d></d>
<d></d>
<d></d>
<d></d>
<d></d>
<d></d>
<d></d>
<d></d>
<d></d>
<d></d>
<d></d>
<d></d>
<d></d>
<d></d>
<d></d>
<d></d>
<d></d>
<d></d>
<d></d>
<d></d>
<d></d>
<d></d>
<d></d>
<d></d>
<d></d>
<d></d>
<d></d>
<d></d>
<d></d>
<d></d>
<d></d>
<d></d>
<d></d>
<d></d>
<d></d>
<d></d>
<d></d>
<d></d>
<d></d>
<d></d>
<d></d>
<d></d>
<d></d>
<d></d>
<d></d>
<d></d>
<d></d>
<d></d>
<d></d>
<d></d>
<d></d>
<d></d>
<d></d>
<d></d>
<d></d>
<d></d>
<d></d>
<d></d>
<d></d>
<d></d>
<d></d>
<d></d>
<d></d>
<d></d>
<d></d>
<d></d>
<d></d>
<d></d>
<d></d>
<d></d>
<d></d>
<d></d>
<d></d>
<d></d>
<d></d>
<d></d>
<d></d>
<d></d>
<d></d>
<d></d>
<d></d>
<d></d>
<d></d>
<d></d>
<d></d>
<d></d>
<d></d>
<d></d>
<d></d>
<d></d>
<d></d>
<d></d>
<d></d>
<d>0.74775611</d>
<d>0.78830084</d>
<d>0.7997524</d>
<d>0.79046735</d>
<d>0.82791705</d>
<d>0.88981739</d>
<d>0.91952956</d>
<d>0.95481275</d>
<d>1</d>
<d>0.90343547</d>
<d>0.93345713</d>
<d>0.88331786</d>
<d>0.83503559</d>
<d>0.79139585</d>
<d>0.81708449</d>
<d>0.81677499</d>
<d>0.79572888</d>
<d>0.80934695</d>
<d>0.78396781</d>
<d>0.80129991</d>
<d>0.8006809</d>
<d>0.75858867</d>
<d>0.77592077</d>
<d>0.78706283</d>
<d>0.79387187</d>
<d>0.81120396</d>
<d>0.86072423</d>
<d>0.8362736</d>
<d>0.79603838</d>
<d>0.78891984</d>
<d>0.78396781</d>
<d>0.76942123</d>
<d>0.78644383</d>
<d>0.7455896</d>
<d>0.72206747</d>
<d>0.70194986</d>
<d>0.67966574</d>
<d>0.6552151</d>
<d>0.67502321</d>
<d>0.69204581</d>
<d>0.68585577</d>
<d>0.76044568</d>
<d>0.77592077</d>
<d>0.76880223</d>
<d>0.73661405</d>
<d>0.73197153</d>
<d>0.74187558</d>
<d>0.72082946</d>
<d>0.71402043</d>
<d>0.68740328</d>
<d>0.6725472</d>
<d>0.67688022</d>
<d>0.63014547</d>
<d>0.60940885</d>
<d>0.57350665</d>
<d>0.52893841</d>
<d>0.5462705</d>
<d>0.52367688</d>
<d>0.50696379</d>
<d>0.49272671</d>
<d>0.4722996</d>
</Subcolumn>
</YColumn>
<YColumn Width="81" Decimals="8" Subcolumns="1">
<Title></Title>
<Subcolumn>
<d></d>
<d></d>
<d></d>
<d></d>
<d></d>
<d></d>
<d></d>
<d></d>
<d></d>
<d></d>
<d></d>
<d></d>
<d></d>
<d></d>
<d></d>
<d></d>
<d></d>
<d></d>
<d></d>
<d></d>
<d></d>
<d></d>
<d></d>
<d></d>
<d></d>
<d></d>
<d></d>
<d></d>
<d></d>
<d></d>
<d></d>
<d></d>
<d></d>
<d></d>
<d></d>
<d></d>
<d></d>
<d></d>
<d></d>
<d></d>
<d></d>
<d></d>
<d></d>
<d></d>
<d></d>
<d></d>
<d></d>
<d></d>
<d></d>
<d></d>
<d></d>
<d></d>
<d></d>
<d></d>
<d></d>
<d></d>
<d></d>
<d></d>
<d></d>
<d></d>
<d></d>
<d></d>
<d></d>
<d></d>
<d></d>
<d></d>
<d></d>
<d></d>
<d></d>
<d></d>
<d></d>
<d></d>
<d></d>
<d></d>
<d></d>
<d></d>
<d></d>
<d></d>
<d></d>
<d></d>
<d></d>
<d></d>
<d></d>
<d></d>
<d></d>
<d></d>
<d></d>
<d></d>
<d></d>
<d></d>
<d></d>
<d></d>
<d></d>
<d></d>
<d></d>
<d></d>
<d></d>
<d></d>
<d></d>
<d></d>
<d></d>
<d></d>
<d></d>
<d></d>
<d></d>
<d></d>
<d></d>
<d></d>
<d></d>
<d></d>
<d></d>
<d></d>
<d></d>
<d></d>
<d></d>
<d></d>
<d></d>
<d></d>
<d></d>
<d></d>
<d></d>
<d></d>
<d></d>
<d></d>
<d></d>
<d></d>
<d></d>
<d></d>
<d></d>
<d></d>
<d></d>
<d></d>
<d></d>
<d></d>
<d></d>
<d></d>
<d></d>
<d></d>
<d></d>
<d></d>
<d></d>
<d></d>
<d></d>
<d></d>
<d></d>
<d></d>
<d></d>
<d></d>
<d></d>
<d></d>
<d></d>
<d></d>
<d></d>
<d></d>
<d></d>
<d></d>
<d></d>
<d></d>
<d></d>
<d></d>
<d></d>
<d></d>
<d></d>
<d></d>
<d></d>
<d></d>
<d></d>
<d></d>
<d></d>
<d></d>
<d></d>
<d></d>
<d></d>
<d></d>
<d></d>
<d></d>
<d></d>
<d></d>
<d></d>
<d></d>
<d></d>
<d></d>
<d></d>
<d></d>
<d></d>
<d></d>
<d></d>
<d></d>
<d></d>
<d></d>
<d></d>
<d></d>
<d></d>
<d></d>
<d></d>
<d></d>
<d></d>
<d></d>
<d></d>
<d></d>
<d></d>
<d></d>
<d></d>
<d></d>
<d></d>
<d></d>
<d></d>
<d></d>
<d></d>
<d></d>
<d></d>
<d></d>
<d></d>
<d></d>
<d></d>
<d></d>
<d></d>
<d></d>
<d></d>
<d></d>
<d></d>
<d></d>
<d></d>
<d></d>
<d></d>
<d></d>
<d>1</d>
<d>0.89251918</d>
<d>0.8295589</d>
<d>0.79769041</d>
<d>0.82972877</d>
<d>0.78438767</d>
<d>0.72064932</d>
<d>0.72205068</d>
<d>0.64519452</d>
<d>0.60258356</d>
<d>0.58530548</d>
<d>0.6369863</d>
<d>0.68946027</d>
<d>0.81547945</d>
<d>0.80142603</d>
<d>0.65568082</d>
<d>0.76225479</d>
<d>0.82663014</d>
<d>0.78150137</d>
<d>0.66565753</d>
<d>0.90716575</d>
<d>0.83980548</d>
<d>0.84246575</d>
<d>0.89093425</d>
<d>0.90150548</d>
<d>0.75021233</d>
<d>0.78631233</d>
<d>0.86107534</d>
<d>0.73542466</d>
<d>0.73232466</d>
<d>0.75059452</d>
<d>0.70206849</d>
<d>0.7335</d>
<d>0.58219178</d>
<d>0.61892877</d>
<d>0.60180548</d>
<d>0.41865753</d>
<d>0.43868219</d>
<d>0.47481096</d>
<d>0.4500589</d>
<d>0.50741507</d>
<d>0.46041781</d>
<d>0.45080959</d>
<d>0.38108493</d>
<d>0.31506849</d>
</Subcolumn>
</YColumn>
<YColumn Width="81" Decimals="8" Subcolumns="1">
<Title></Title>
<Subcolumn>
<d></d>
<d></d>
<d></d>
<d></d>
<d></d>
<d></d>
<d></d>
<d></d>
<d></d>
<d></d>
<d></d>
<d></d>
<d></d>
<d></d>
<d></d>
<d></d>
<d></d>
<d></d>
<d></d>
<d></d>
<d></d>
<d></d>
<d></d>
<d></d>
<d></d>
<d></d>
<d></d>
<d></d>
<d></d>
<d></d>
<d></d>
<d></d>
<d></d>
<d></d>
<d></d>
<d></d>
<d></d>
<d></d>
<d></d>
<d></d>
<d></d>
<d></d>
<d></d>
<d></d>
<d></d>
<d></d>
<d></d>
<d></d>
<d></d>
<d></d>
<d></d>
<d></d>
<d></d>
<d></d>
<d></d>
<d></d>
<d></d>
<d></d>
<d></d>
<d></d>
<d></d>
<d></d>
<d></d>
<d></d>
<d></d>
<d></d>
<d></d>
<d></d>
<d></d>
<d></d>
<d></d>
<d></d>
<d></d>
<d></d>
<d></d>
<d></d>
<d></d>
<d></d>
<d></d>
<d></d>
<d></d>
<d></d>
<d></d>
<d></d>
<d></d>
<d></d>
<d></d>
<d></d>
<d></d>
<d></d>
<d></d>
<d></d>
<d></d>
<d></d>
<d></d>
<d></d>
<d></d>
<d></d>
<d></d>
<d></d>
<d></d>
<d></d>
<d></d>
<d></d>
<d></d>
<d></d>
<d></d>
<d></d>
<d></d>
<d></d>
<d></d>
<d></d>
<d></d>
<d></d>
<d></d>
<d></d>
<d></d>
<d></d>
<d></d>
<d></d>
<d></d>
<d></d>
<d></d>
<d></d>
<d></d>
<d></d>
<d></d>
<d></d>
<d></d>
<d></d>
<d></d>
<d></d>
<d></d>
<d></d>
<d></d>
<d></d>
<d></d>
<d></d>
<d></d>
<d></d>
<d></d>
<d></d>
<d></d>
<d></d>
<d></d>
<d></d>
<d></d>
<d></d>
<d></d>
<d></d>
<d></d>
<d></d>
<d></d>
<d></d>
<d></d>
<d></d>
<d></d>
<d></d>
<d></d>
<d></d>
<d></d>
<d></d>
<d></d>
<d></d>
<d></d>
<d></d>
<d></d>
<d></d>
<d></d>
<d></d>
<d></d>
<d></d>
<d></d>
<d></d>
<d></d>
<d></d>
<d></d>
<d></d>
<d></d>
<d></d>
<d></d>
<d></d>
<d></d>
<d></d>
<d></d>
<d></d>
<d></d>
<d></d>
<d></d>
<d></d>
<d></d>
<d></d>
<d></d>
<d></d>
<d></d>
<d></d>
<d></d>
<d></d>
<d></d>
<d></d>
<d></d>
<d></d>
<d></d>
<d></d>
<d></d>
<d></d>
<d></d>
<d></d>
<d></d>
<d></d>
<d></d>
<d></d>
<d></d>
<d></d>
<d></d>
<d></d>
<d></d>
<d></d>
<d></d>
<d></d>
<d></d>
<d></d>
<d></d>
<d></d>
<d></d>
<d></d>
<d></d>
<d></d>
<d></d>
<d></d>
<d></d>
<d></d>
<d></d>
<d></d>
<d></d>
<d></d>
<d></d>
<d></d>
<d></d>
<d></d>
<d></d>
<d></d>
<d></d>
<d></d>
<d></d>
<d></d>
<d></d>
<d></d>
<d></d>
<d></d>
<d></d>
<d></d>
<d></d>
<d></d>
<d></d>
<d></d>
<d></d>
<d></d>
<d></d>
<d></d>
<d></d>
<d></d>
<d></d>
<d></d>
<d></d>
<d></d>
<d></d>
<d></d>
<d></d>
<d></d>
<d></d>
<d>0.50859934</d>
<d>0.62839858</d>
<d>0.8211381</d>
<d>0.7602427</d>
<d>0.78617145</d>
<d>0.7366544</d>
<d>0.64421691</d>
<d>0.66383368</d>
<d>0.64103237</d>
<d>0.77646167</d>
<d>0.74966919</d>
<d>0.67107274</d>
<d>0.71473109</d>
<d>0.82677463</d>
<d>0.77158803</d>
<d>0.77419884</d>
<d>0.83817797</d>
<d>0.82961744</d>
<d>0.88473711</d>
<d>0.91099422</d>
<d>0.8314707</d>
<d>0.87502733</d>
<d>1</d>
<d>0.88613621</d>
<d>0.74804256</d>
<d>0.75306163</d>
<d>0.71193201</d>
<d>0.64364318</d>
<d>0.58848424</d>
<d>0.62122287</d>
<d>0.65409088</d>
<d>0.56531174</d>
<d>0.59447857</d>
<d>0.61263736</d>
<d>0.60961164</d>
<d>0.61770907</d>
<d>0.54150126</d>
<d>0.45243748</d>
<d>0.50320908</d>
<d>0.45291039</d>
<d>0.392835</d>
<d>0.40461933</d>
<d>0.39644427</d>
<d>0.33014343</d>
</Subcolumn>
</YColumn>
</Table>
<Table ID="Table1" XFormat="none" TableType="OneWay" EVFormat="AsteriskAfterNumber">
<Title>Copy of Par-1 Late</Title>
<RowTitlesColumn Width="32">
<Subcolumn></Subcolumn>
</RowTitlesColumn>
<YColumn Width="81" Decimals="8" Subcolumns="1">
<Title>Basolateral</Title>
<Subcolumn>
<d>0.81843551</d>
<d>0.86778443</d>
<d>0.88082122</d>
<d>0.82867788</d>
<d>0.7811919</d>
<d>0.78491779</d>
<d>0.76815893</d>
<d>0.76815893</d>
<d>0.72346355</d>
<d>0.75232773</d>
<d>0.76443304</d>
<d>0.79143428</d>
<d>0.79236575</d>
<d>0.86219942</d>
<d>0.86313089</d>
<d>0.85288852</d>
<d>0.88361182</d>
<d>0.8687159</d>
<d>0.8500941</d>
<d>0.92364984</d>
<d>0.86592149</d>
<d>0.93948105</d>
<d>0.8910636</d>
<d>0.86778443</d>
<d>0.86964738</d>
<d>0.96461934</d>
<d>0.98975763</d>
<d>0.97765613</d>
<d>1</d>
<d>0.90409657</d>
<d>0.9189963</d>
<d>0.95437696</d>
<d>0.92737573</d>
<d>0.86964738</d>
<d>0.93389222</d>
<d>0.86033648</d>
<d>0.94599753</d>
<d>0.9217869</d>
<d>0.91620189</d>
<d>0.84543674</d>
<d>0.86592149</d>
<d>0.93948105</d>
<d>0.87244179</d>
<d>0.8687159</d>
<d>0.87988975</d>
<d>0.82309287</d>
<d>0.80819314</d>
<d>0.87802681</d>
<d>0.79795076</d>
<d>0.81750404</d>
<d>0.74953331</d>
<d>0.72998385</d>
<d>0.68342553</d>
<d>0.71043058</d>
<d>0.66666667</d>
<d>0.65270222</d>
<d>0.65083928</d>
<d>0.67690904</d>
<d>0.61638627</d>
<d>0.631286</d>
<d>0.6033533</d>
<d>0.60055888</d>
<d>0.6219751</d>
<d>0.64711339</d>
<d>0.65549282</d>
<d>0.61918069</d>
<d>0.61731774</d>
<d>0.6750461</d>
<d>0.65549282</d>
<d>0.66015018</d>
<d>0.6126642</d>
<d>0.65270222</d>
<d>0.64431898</d>
<d>0.64990781</d>
<d>0.64990781</d>
<d>0.65921871</d>
<d>0.60707537</d>
<d>0.64711339</d>
<d>0.54748789</d>
<d>0.74690933</d>
<d>0.79505534</d>
<d>0.82173053</d>
<d>0.86141806</d>
<d>0.96356535</d>
<d>0.93558876</d>
<d>1</d>
<d>0.96031206</d>
<d>0.9512035</d>
<d>0.93688975</d>
<d>0.83864666</d>
<d>0.81717625</d>
<d>0.7085232</d>
<d>0.73324649</d>
<d>0.70917369</d>
<d>0.7059204</d>
<d>0.67924521</d>
<d>0.64216007</d>
<d>0.64736484</d>
<d>0.67599192</d>
<d>0.7059204</d>
<d>0.67143764</d>
<d>0.66558196</d>
<d>0.70396851</d>
<d>0.72934271</d>
<d>0.72869221</d>
<d>0.75992168</d>
<d>0.7807416</d>
<d>0.80676629</d>
<d>0.81717625</d>
<d>0.83669477</d>
<d>0.86922563</d>
<d>0.81912814</d>
<d>0.88614177</d>
<d>0.90370839</d>
<d>0.84775522</d>
<d>0.82563431</d>
<d>0.83864666</d>
<d>0.72348703</d>
<d>0.58029212</d>
<d>0.55584925</d>
<d>0.61474696</d>
<d>0.67976579</d>
<d>0.68921005</d>
<d>0.62096866</d>
<d>0.70303744</d>
<d>0.68651169</d>
<d>0.77100319</d>
<d>0.72025761</d>
<d>0.69564259</d>
<d>0.81481718</d>
<d>0.87104265</d>
<d>1</d>
<d>0.98544821</d>
<d>0.93141624</d>
<d>0.94599705</d>
<d>0.91466611</d>
<d>0.90551684</d>
<d>0.78328604</d>
<d>0.86533838</d>
<d>0.79992495</d>
<d>0.70802409</d>
<d>0.66253595</d>
<d>0.61006207</d>
<d>0.47718775</d>
<d>0.4232525</d>
<d>0.37791718</d>
<d>0.3888257</d>
<d>0.74775611</d>
<d>0.78830084</d>
<d>0.7997524</d>
<d>0.79046735</d>
<d>0.82791705</d>
<d>0.88981739</d>
<d>0.91952956</d>
<d>0.95481275</d>
<d>1</d>
<d>0.90343547</d>
<d>0.93345713</d>
<d>0.88331786</d>
<d>0.83503559</d>
<d>0.79139585</d>
<d>0.81708449</d>
<d>0.81677499</d>
<d>0.79572888</d>
<d>0.80934695</d>
<d>0.78396781</d>
<d>0.80129991</d>
<d>0.8006809</d>
<d>0.75858867</d>
<d>0.77592077</d>
<d>0.78706283</d>
<d>0.79387187</d>
<d>0.81120396</d>
<d>0.86072423</d>
<d>0.8362736</d>
<d>0.79603838</d>
<d>0.78891984</d>
<d>0.78396781</d>
<d>0.76942123</d>
<d>0.78644383</d>
<d>0.7455896</d>
<d>0.72206747</d>
<d>0.70194986</d>
<d>0.67966574</d>
<d>0.6552151</d>
<d>0.67502321</d>
<d>0.69204581</d>
<d>0.68585577</d>
<d>0.76044568</d>
<d>0.77592077</d>
<d>0.76880223</d>
<d>0.73661405</d>
<d>0.73197153</d>
<d>0.74187558</d>
<d>0.72082946</d>
<d>0.71402043</d>
<d>0.68740328</d>
<d>0.6725472</d>
<d>0.67688022</d>
<d>0.63014547</d>
<d>0.60940885</d>
<d>1</d>
<d>0.89251918</d>
<d>0.8295589</d>
<d>0.79769041</d>
<d>0.82972877</d>
<d>0.78438767</d>
<d>0.72064932</d>
<d>0.72205068</d>
<d>0.64519452</d>
<d>0.60258356</d>
<d>0.58530548</d>
<d>0.6369863</d>
<d>0.68946027</d>
<d>0.81547945</d>
<d>0.80142603</d>
<d>0.65568082</d>
<d>0.76225479</d>
<d>0.82663014</d>
<d>0.78150137</d>
<d>0.66565753</d>
<d>0.90716575</d>
<d>0.83980548</d>
<d>0.84246575</d>
<d>0.89093425</d>
<d>0.90150548</d>
<d>0.75021233</d>
<d>0.78631233</d>
<d>0.86107534</d>
<d>0.73542466</d>
<d>0.73232466</d>
<d>0.75059452</d>
<d>0.70206849</d>
<d>0.7335</d>
<d>0.58219178</d>
<d>0.61892877</d>
<d>0.60180548</d>
<d>0.41865753</d>
<d>0.43868219</d>
<d>0.47481096</d>
<d>0.4500589</d>
<d>0.50859934</d>
<d>0.62839858</d>
<d>0.8211381</d>
<d>0.7602427</d>
<d>0.78617145</d>
<d>0.7366544</d>
<d>0.64421691</d>
<d>0.66383368</d>
<d>0.64103237</d>
<d>0.77646167</d>
<d>0.74966919</d>
<d>0.67107274</d>
<d>0.71473109</d>
<d>0.82677463</d>
<d>0.77158803</d>
<d>0.77419884</d>
<d>0.83817797</d>
<d>0.82961744</d>
<d>0.88473711</d>
<d>0.91099422</d>
<d>0.8314707</d>
<d>0.87502733</d>
<d>1</d>
<d>0.88613621</d>
<d>0.74804256</d>
<d>0.75306163</d>
<d>0.71193201</d>
<d>0.64364318</d>
<d>0.58848424</d>
<d>0.62122287</d>
<d>0.65409088</d>
<d>0.56531174</d>
<d>0.59447857</d>
<d>0.61263736</d>
<d>0.60961164</d>
<d>0.61770907</d>
<d>0.54150126</d>
<d>0.45243748</d>
<d>0.50320908</d>
</Subcolumn>
</YColumn>
<YColumn Width="81" Decimals="8" Subcolumns="1">
<Title>Apical</Title>
<Subcolumn>
<d>0.53910846</d>
<d>0.50000191</d>
<d>0.50838134</d>
<d>0.45251593</d>
<d>0.52886609</d>
<d>0.48230776</d>
<d>0.43854767</d>
<d>0.48138011</d>
<d>0.45437505</d>
<d>0.74235505</d>
<d>0.64736484</d>
<d>0.64671435</d>
<d>0.62068966</d>
<d>0.64150916</d>
<d>0.31906105</d>
<d>0.30130991</d>
<d>0.29314714</d>
<d>0.21035589</d>
<d>0.57350665</d>
<d>0.52893841</d>
<d>0.5462705</d>
<d>0.52367688</d>
<d>0.50696379</d>
<d>0.49272671</d>
<d>0.4722996</d>
<d>0.50741507</d>
<d>0.46041781</d>
<d>0.45080959</d>
<d>0.38108493</d>
<d>0.31506849</d>
<d>0.45291039</d>
<d>0.392835</d>
<d>0.40461933</d>
<d>0.39644427</d>
<d>0.33014343</d>
</Subcolumn>
</YColumn>
</Table>
<Table ID="Table5" XFormat="numbers" YFormat="replicates" Replicates="1" TableType="XY" EVFormat="AsteriskAfterNumber">
<Title>Par-1 Early</Title>
<RowTitlesColumn Width="84">
<Subcolumn></Subcolumn>
</RowTitlesColumn>
<XColumn Width="77" Subcolumns="1" Decimals="8">
<Title></Title>
<Subcolumn>
<d>0</d>
<d>0.0101007</d>
<d>0.02020139</d>
<d>0.03030392</d>
<d>0.04040461</d>
<d>0.05050531</d>
<d>0.06060601</d>
<d>0.0707067</d>
<d>0.0808074</d>
<d>0.09090992</d>
<d>0.10101062</d>
<d>0.11111131</d>
<d>0.12121201</d>
<d>0.13131271</d>
<d>0.1414134</d>
<d>0.15151593</d>
<d>0.16161662</d>
<d>0.17171732</d>
<d>0.18181802</d>
<d>0.19191871</d>
<d>0.20201941</d>
<d>0.21212193</d>
<d>0.22222263</d>
<d>0.23232332</d>
<d>0.24242402</d>
<d>0.25252472</d>
<d>0.26262724</d>
<d>0.27272794</d>
<d>0.28282863</d>
<d>0.29292933</d>
<d>0.30303003</d>
<d>0.31313072</d>
<d>0.32323325</d>
<d>0.33333394</d>
<d>0.34343464</d>
<d>0.35353534</d>
<d>0.36363603</d>
<d>0.37373673</d>
<d>0.38383925</d>
<d>0.39393995</d>
<d>0.40404064</d>
<d>0.41414134</d>
<d>0.42424204</d>
<d>0.43434273</d>
<d>0.44444526</d>
<d>0.45454595</d>
<d>0.46464665</d>
<d>0.47474735</d>
<d>0.48484804</d>
<d>0.49494874</d>
<d>0.50505126</d>
<d>0.51515196</d>
<d>0.52525265</d>
<d>0.53535335</d>
<d>0.54545405</d>
<d>0.55555657</d>
<d>0.56565727</d>
<d>0.57575796</d>
<d>0.58585866</d>
<d>0.59595936</d>
<d>0.60606005</d>
<d>0.61616258</d>
<d>0.62626327</d>
<d>0.63636397</d>
<d>0.64646466</d>
<d>0.65656536</d>
<d>0.66666606</d>
<d>0.67676858</d>
<d>0.68686928</d>
<d>0.69696997</d>
<d>0.70707067</d>
<d>0.71717137</d>
<d>0.72727206</d>
<d>0.73737459</d>
<d>0.74747528</d>
<d>0.75757598</d>
<d>0.76767668</d>
<d>0.77777737</d>
<d>0.7878799</d>
<d>0.79798059</d>
<d>0.80808129</d>
<d>0.81818198</d>
<d>0.82828268</d>
<d>0.83838338</d>
<d>0.8484859</d>
<d>0.8585866</d>
<d>0.86868729</d>
<d>0.87878799</d>
<d>0.88888869</d>
<d>0.89898938</d>
<d>0.90909191</d>
<d>0.9191926</d>
<d>0.9292933</d>
<d>0.93939399</d>
<d>0.94949469</d>
<d>0.95959539</d>
<d>0.96969791</d>
<d>0.97979861</d>
<d>0.9898993</d>
<d>1</d>
<d>0</d>
<d>0.00396885</d>
<d>0.00793626</d>
<d>0.0119051</d>
<d>0.01587251</d>
<d>0.01984136</d>
<d>0.02381021</d>
<d>0.02777762</d>
<d>0.03174647</d>
<d>0.03571387</d>
<d>0.03968272</d>
<d>0.04365013</d>
<d>0.04761898</d>
<d>0.05158783</d>
<d>0.05555524</d>
<d>0.05952408</d>
<d>0.06349149</d>
<d>0.06746034</d>
<d>0.07142919</d>
<d>0.0753966</d>
<d>0.07936544</d>
<d>0.08333285</d>
<d>0.0873017</d>
<d>0.09126911</d>
<d>0.09523796</d>
<d>0.09920681</d>
<d>0.10317421</d>
<d>0.10714306</d>
<d>0.11111047</d>
<d>0.11507932</d>
<d>0.11904817</d>
<d>0.12301558</d>
<d>0.12698442</d>
<d>0.13095183</d>
<d>0.13492068</d>
<d>0.13888953</d>
<d>0.14285694</d>
<d>0.14682579</d>
<d>0.15079319</d>
<d>0.15476204</d>
<d>0.15872945</d>
<d>0.1626983</d>
<d>0.16666715</d>
<d>0.17063456</d>
<d>0.1746034</d>
<d>0.17857081</d>
<d>0.18253966</d>
<d>0.18650851</d>
<d>0.19047592</d>
<d>0.19444476</d>
<d>0.19841217</d>
<d>0.20238102</d>
<d>0.20634987</d>
<d>0.21031728</d>
<d>0.21428613</d>
<d>0.21825353</d>
<d>0.22222238</d>
<d>0.22618979</d>
<d>0.23015864</d>
<d>0.23412749</d>
<d>0.2380949</d>
<d>0.24206374</d>
<d>0.24603115</d>
<d>0.25</d>
<d>0.25396885</d>
<d>0.25793626</d>
<d>0.2619051</d>
<d>0.26587251</d>
<d>0.26984136</d>
<d>0.27380877</d>
<d>0.27777762</d>
<d>0.28174647</d>
<d>0.28571387</d>
<d>0.28968272</d>
<d>0.29365013</d>
<d>0.29761898</d>
<d>0.30158783</d>
<d>0.30555524</d>
<d>0.30952408</d>
<d>0.31349149</d>
<d>0.31746034</d>
<d>0.32142919</d>
<d>0.3253966</d>
<d>0.32936544</d>
<d>0.33333285</d>
<d>0.3373017</d>
<d>0.34126911</d>
<d>0.34523796</d>
<d>0.34920681</d>
<d>0.35317421</d>
<d>0.35714306</d>
<d>0.36111047</d>
<d>0.36507932</d>
<d>0.36904817</d>
<d>0.37301558</d>
<d>0.37698442</d>
<d>0.38095183</d>
<d>0.38492068</d>
<d>0.38888809</d>
<d>0.39285694</d>
<d>0.39682579</d>
<d>0.40079319</d>
<d>0.40476204</d>
<d>0.40872945</d>
<d>0.4126983</d>
<d>0.41666715</d>
<d>0.42063456</d>
<d>0.4246034</d>
<d>0.42857081</d>
<d>0.43253966</d>
<d>0.43650851</d>
<d>0.44047592</d>
<d>0.44444476</d>
<d>0.44841217</d>
<d>0.45238102</d>
<d>0.45634843</d>
<d>0.46031728</d>
<d>0.46428613</d>
<d>0.46825353</d>
<d>0.47222238</d>
<d>0.47618979</d>
<d>0.48015864</d>
<d>0.48412749</d>
<d>0.4880949</d>
<d>0.49206374</d>
<d>0.49603115</d>
<d>0.5</d>
<d>0.50396885</d>
<d>0.50793626</d>
<d>0.5119051</d>
<d>0.51587251</d>
<d>0.51984136</d>
<d>0.52380877</d>
<d>0.52777762</d>
<d>0.53174647</d>
<d>0.53571387</d>
<d>0.53968272</d>
<d>0.54365013</d>
<d>0.54761898</d>
<d>0.55158783</d>
<d>0.55555524</d>
<d>0.55952408</d>
<d>0.56349149</d>
<d>0.56746034</d>
<d>0.57142775</d>
<d>0.5753966</d>
<d>0.57936544</d>
<d>0.58333285</d>
<d>0.5873017</d>
<d>0.59126911</d>
<d>0.59523796</d>
<d>0.59920681</d>
<d>0.60317421</d>
<d>0.60714306</d>
<d>0.61111047</d>
<d>0.61507932</d>
<d>0.61904817</d>
<d>0.62301558</d>
<d>0.62698442</d>
<d>0.63095183</d>
<d>0.63492068</d>
<d>0.63888809</d>
<d>0.64285694</d>
<d>0.64682579</d>
<d>0.65079319</d>
<d>0.65476204</d>
<d>0.65872945</d>
<d>0.6626983</d>
<d>0.66666715</d>
<d>0.67063456</d>
<d>0.6746034</d>
<d>0.67857081</d>
<d>0.68253966</d>
<d>0.68650707</d>
<d>0.69047592</d>
<d>0.69444476</d>
<d>0.69841217</d>
<d>0.70238102</d>
<d>0.70634843</d>
<d>0.71031728</d>
<d>0.71428613</d>
<d>0.71825353</d>
<d>0.72222238</d>
<d>0.72618979</d>
<d>0.73015864</d>
<d>0.73412749</d>
<d>0.7380949</d>
<d>0.74206374</d>
<d>0.74603115</d>
<d>0.75</d>
<d>0.75396741</d>
<d>0.75793626</d>
<d>0.7619051</d>
<d>0.76587251</d>
<d>0.76984136</d>
<d>0.77380877</d>
<d>0.77777762</d>
<d>0.78174647</d>
<d>0.78571387</d>
<d>0.78968272</d>
<d>0.79365013</d>
<d>0.79761898</d>
<d>0.80158783</d>
<d>0.80555524</d>
<d>0.80952408</d>
<d>0.81349149</d>
<d>0.81746034</d>
<d>0.82142775</d>
<d>0.8253966</d>
<d>0.82936544</d>
<d>0.83333285</d>
<d>0.8373017</d>
<d>0.84126911</d>
<d>0.84523796</d>
<d>0.84920681</d>
<d>0.85317421</d>
<d>0.85714306</d>
<d>0.86111047</d>
<d>0.86507932</d>
<d>0.86904673</d>
<d>0.87301558</d>
<d>0.87698442</d>
<d>0.88095183</d>
<d>0.88492068</d>
<d>0.88888809</d>
<d>0.89285694</d>
<d>0.89682579</d>
<d>0.90079319</d>
<d>0.90476204</d>
<d>0.90872945</d>
<d>0.9126983</d>
<d>0.91666715</d>
<d>0.92063456</d>
<d>0.9246034</d>
<d>0.92857081</d>
<d>0.93253966</d>
<d>0.93650707</d>
<d>0.94047592</d>
<d>0.94444476</d>
<d>0.94841217</d>
<d>0.95238102</d>
<d>0.95634843</d>
<d>0.96031728</d>
<d>0.96428613</d>
<d>0.96825353</d>
<d>0.97222238</d>
<d>0.97618979</d>
<d>0.98015864</d>
<d>0.98412605</d>
<d>0.9880949</d>
<d>0.99206374</d>
<d>0.99603115</d>
<d>1</d>
<d>0</d>
<d>0.00444511</d>
<d>0.00888861</d>
<d>0.01333372</d>
<d>0.01777722</d>
<d>0.02222233</d>
<d>0.02666744</d>
<d>0.03111094</d>
<d>0.03555605</d>
<d>0.03999955</d>
<d>0.04444466</d>
<d>0.04888816</d>
<d>0.05333327</d>
<d>0.05777838</d>
<d>0.06222188</d>
<d>0.06666699</d>
<d>0.07111049</d>
<d>0.0755556</d>
<d>0.08000071</d>
<d>0.08444421</d>
<d>0.08888932</d>
<d>0.09333282</d>
<d>0.09777793</d>
<d>0.10222143</d>
<d>0.10666654</d>
<d>0.11111165</d>
<d>0.11555515</d>
<d>0.12000026</d>
<d>0.12444376</d>
<d>0.12888887</d>
<d>0.13333398</d>
<d>0.13777748</d>
<d>0.14222259</d>
<d>0.14666609</d>
<d>0.1511112</d>
<d>0.15555631</d>
<d>0.15999981</d>
<d>0.16444492</d>
<d>0.16888842</d>
<d>0.17333353</d>
<d>0.17777703</d>
<d>0.18222214</d>
<d>0.18666725</d>
<d>0.19111075</d>
<d>0.19555586</d>
<d>0.19999936</d>
<d>0.20444447</d>
<d>0.20888958</d>
<d>0.21333308</d>
<d>0.21777819</d>
<d>0.22222168</d>
<d>0.2266668</d>
<d>0.23111191</d>
<d>0.23555541</d>
<d>0.24000052</d>
<d>0.24444401</d>
<d>0.24888913</d>
<d>0.25333262</d>
<d>0.25777773</d>
<d>0.26222285</d>
<d>0.26666634</d>
<d>0.27111146</d>
<d>0.27555495</d>
<d>0.28000006</d>
<d>0.28444518</d>
<d>0.28888867</d>
<d>0.29333378</d>
<d>0.29777728</d>
<d>0.30222239</d>
<d>0.30666589</d>
<d>0.311111</d>
<d>0.31555611</d>
<d>0.31999961</d>
<d>0.32444472</d>
<d>0.32888822</d>
<d>0.33333333</d>
<d>0.33777844</d>
<d>0.34222194</d>
<d>0.34666705</d>
<d>0.35111055</d>
<d>0.35555566</d>
<d>0.36000077</d>
<d>0.36444427</d>
<d>0.36888938</d>
<d>0.37333288</d>
<d>0.37777799</d>
<d>0.38222149</d>
<d>0.3866666</d>
<d>0.39111171</d>
<d>0.39555521</d>
<d>0.40000032</d>
<d>0.40444382</d>
<d>0.40888893</d>
<d>0.41333404</d>
<d>0.41777754</d>
<d>0.42222265</d>
<d>0.42666615</d>
<d>0.43111126</d>
<d>0.43555476</d>
<d>0.43999987</d>
<d>0.44444498</d>
<d>0.44888848</d>
<d>0.45333359</d>
<d>0.45777709</d>
<d>0.4622222</d>
<d>0.46666731</d>
<d>0.47111081</d>
<d>0.47555592</d>
<d>0.47999942</d>
<d>0.48444453</d>
<d>0.48888964</d>
<d>0.49333314</d>
<d>0.49777825</d>
<d>0.50222175</d>
<d>0.50666686</d>
<d>0.51111036</d>
<d>0.51555547</d>
<d>0.52000058</d>
<d>0.52444408</d>
<d>0.52888919</d>
<d>0.53333269</d>
<d>0.5377778</d>
<d>0.54222291</d>
<d>0.54666641</d>
<d>0.55111152</d>
<d>0.55555502</d>
<d>0.56000013</d>
<d>0.56444524</d>
<d>0.56888874</d>
<d>0.57333385</d>
<d>0.57777735</d>
<d>0.58222246</d>
<d>0.58666596</d>
<d>0.59111107</d>
<d>0.59555618</d>
<d>0.59999968</d>
<d>0.60444479</d>
<d>0.60888829</d>
<d>0.6133334</d>
<d>0.61777851</d>
<d>0.62222201</d>
<d>0.62666712</d>
<d>0.63111062</d>
<d>0.63555573</d>
<d>0.63999923</d>
<d>0.64444434</d>
<d>0.64888945</d>
<d>0.65333295</d>
<d>0.65777806</d>
<d>0.66222156</d>
<d>0.66666667</d>
<d>0.67111178</d>
<d>0.67555528</d>
<d>0.68000039</d>
<d>0.68444389</d>
<d>0.688889</d>
<d>0.69333411</d>
<d>0.69777761</d>
<d>0.70222272</d>
<d>0.70666622</d>
<d>0.71111133</d>
<d>0.71555482</d>
<d>0.71999994</d>
<d>0.72444505</d>
<d>0.72888854</d>
<d>0.73333366</d>
<d>0.73777715</d>
<d>0.74222227</d>
<d>0.74666738</d>
<d>0.75111087</d>
<d>0.75555599</d>
<d>0.75999948</d>
<d>0.76444459</d>
<d>0.76888809</d>
<d>0.7733332</d>
<d>0.77777832</d>
<d>0.78222181</d>
<d>0.78666692</d>
<d>0.79111042</d>
<d>0.79555553</d>
<d>0.80000064</d>
<d>0.80444414</d>
<d>0.80888925</d>
<d>0.81333275</d>
<d>0.81777786</d>
<d>0.82222297</d>
<d>0.82666647</d>
<d>0.83111158</d>
<d>0.83555508</d>
<d>0.84000019</d>
<d>0.84444369</d>
<d>0.8488888</d>
<d>0.85333391</d>
<d>0.85777741</d>
<d>0.86222252</d>
<d>0.86666602</d>
<d>0.87111113</d>
<d>0.87555624</d>
<d>0.87999974</d>
<d>0.88444485</d>
<d>0.88888835</d>
<d>0.89333346</d>
<d>0.89777857</d>
<d>0.90222207</d>
<d>0.90666718</d>
<d>0.91111068</d>
<d>0.91555579</d>
<d>0.91999929</d>
<d>0.9244444</d>
<d>0.92888951</d>
<d>0.93333301</d>
<d>0.93777812</d>
<d>0.94222162</d>
<d>0.94666673</d>
<d>0.95111184</d>
<d>0.95555534</d>
<d>0.96000045</d>
<d>0.96444395</d>
<d>0.96888906</d>
<d>0.97333256</d>
<d>0.97777767</d>
<d>0.98222278</d>
<d>0.98666628</d>
<d>0.99111139</d>
<d>0.99555489</d>
<d>1</d>
<d>0</d>
<d>0.00444511</d>
<d>0.00888861</d>
<d>0.01333372</d>
<d>0.01777722</d>
<d>0.02222233</d>
<d>0.02666744</d>
<d>0.03111094</d>
<d>0.03555605</d>
<d>0.03999955</d>
<d>0.04444466</d>
<d>0.04888816</d>
<d>0.05333327</d>
<d>0.05777838</d>
<d>0.06222188</d>
<d>0.06666699</d>
<d>0.07111049</d>
<d>0.0755556</d>
<d>0.08000071</d>
<d>0.08444421</d>
<d>0.08888932</d>
<d>0.09333282</d>
<d>0.09777793</d>
<d>0.10222143</d>
<d>0.10666654</d>
<d>0.11111165</d>
<d>0.11555515</d>
<d>0.12000026</d>
<d>0.12444376</d>
<d>0.12888887</d>
<d>0.13333398</d>
<d>0.13777748</d>
<d>0.14222259</d>
<d>0.14666609</d>
<d>0.1511112</d>
<d>0.15555631</d>
<d>0.15999981</d>
<d>0.16444492</d>
<d>0.16888842</d>
<d>0.17333353</d>
<d>0.17777703</d>
<d>0.18222214</d>
<d>0.18666725</d>
<d>0.19111075</d>
<d>0.19555586</d>
<d>0.19999936</d>
<d>0.20444447</d>
<d>0.20888958</d>
<d>0.21333308</d>
<d>0.21777819</d>
<d>0.22222168</d>
<d>0.2266668</d>
<d>0.23111191</d>
<d>0.23555541</d>
<d>0.24000052</d>
<d>0.24444401</d>
<d>0.24888913</d>
<d>0.25333262</d>
<d>0.25777773</d>
<d>0.26222285</d>
<d>0.26666634</d>
<d>0.27111146</d>
<d>0.27555495</d>
<d>0.28000006</d>
<d>0.28444518</d>
<d>0.28888867</d>
<d>0.29333378</d>
<d>0.29777728</d>
<d>0.30222239</d>
<d>0.30666589</d>
<d>0.311111</d>
<d>0.31555611</d>
<d>0.31999961</d>
<d>0.32444472</d>
<d>0.32888822</d>
<d>0.33333333</d>
<d>0.33777844</d>
<d>0.34222194</d>
<d>0.34666705</d>
<d>0.35111055</d>
<d>0.35555566</d>
<d>0.36000077</d>
<d>0.36444427</d>
<d>0.36888938</d>
<d>0.37333288</d>
<d>0.37777799</d>
<d>0.38222149</d>
<d>0.3866666</d>
<d>0.39111171</d>
<d>0.39555521</d>
<d>0.40000032</d>
<d>0.40444382</d>
<d>0.40888893</d>
<d>0.41333404</d>
<d>0.41777754</d>
<d>0.42222265</d>
<d>0.42666615</d>
<d>0.43111126</d>
<d>0.43555476</d>
<d>0.43999987</d>
<d>0.44444498</d>
<d>0.44888848</d>
<d>0.45333359</d>
<d>0.45777709</d>
<d>0.4622222</d>
<d>0.46666731</d>
<d>0.47111081</d>
<d>0.47555592</d>
<d>0.47999942</d>
<d>0.48444453</d>
<d>0.48888964</d>
<d>0.49333314</d>
<d>0.49777825</d>
<d>0.50222175</d>
<d>0.50666686</d>
<d>0.51111036</d>
<d>0.51555547</d>
<d>0.52000058</d>
<d>0.52444408</d>
<d>0.52888919</d>
<d>0.53333269</d>
<d>0.5377778</d>
<d>0.54222291</d>
<d>0.54666641</d>
<d>0.55111152</d>
<d>0.55555502</d>
<d>0.56000013</d>
<d>0.56444524</d>
<d>0.56888874</d>
<d>0.57333385</d>
<d>0.57777735</d>
<d>0.58222246</d>
<d>0.58666596</d>
<d>0.59111107</d>
<d>0.59555618</d>
<d>0.59999968</d>
<d>0.60444479</d>
<d>0.60888829</d>
<d>0.6133334</d>
<d>0.61777851</d>
<d>0.62222201</d>
<d>0.62666712</d>
<d>0.63111062</d>
<d>0.63555573</d>
<d>0.63999923</d>
<d>0.64444434</d>
<d>0.64888945</d>
<d>0.65333295</d>
<d>0.65777806</d>
<d>0.66222156</d>
<d>0.66666667</d>
<d>0.67111178</d>
<d>0.67555528</d>
<d>0.68000039</d>
<d>0.68444389</d>
<d>0.688889</d>
<d>0.69333411</d>
<d>0.69777761</d>
<d>0.70222272</d>
<d>0.70666622</d>
<d>0.71111133</d>
<d>0.71555482</d>
<d>0.71999994</d>
<d>0.72444505</d>
<d>0.72888854</d>
<d>0.73333366</d>
<d>0.73777715</d>
<d>0.74222227</d>
<d>0.74666738</d>
<d>0.75111087</d>
<d>0.75555599</d>
<d>0.75999948</d>
<d>0.76444459</d>
<d>0.76888809</d>
<d>0.7733332</d>
<d>0.77777832</d>
<d>0.78222181</d>
<d>0.78666692</d>
<d>0.79111042</d>
<d>0.79555553</d>
<d>0.80000064</d>
<d>0.80444414</d>
<d>0.80888925</d>
<d>0.81333275</d>
<d>0.81777786</d>
<d>0.82222297</d>
<d>0.82666647</d>
<d>0.83111158</d>
<d>0.83555508</d>
<d>0.84000019</d>
<d>0.84444369</d>
<d>0.8488888</d>
<d>0.85333391</d>
<d>0.85777741</d>
<d>0.86222252</d>
<d>0.86666602</d>
<d>0.87111113</d>
<d>0.87555624</d>
<d>0.87999974</d>
<d>0.88444485</d>
<d>0.88888835</d>
<d>0.89333346</d>
<d>0.89777857</d>
<d>0.90222207</d>
<d>0.90666718</d>
<d>0.91111068</d>
<d>0.91555579</d>
<d>0.91999929</d>
<d>0.9244444</d>
<d>0.92888951</d>
<d>0.93333301</d>
<d>0.93777812</d>
<d>0.94222162</d>
<d>0.94666673</d>
<d>0.95111184</d>
<d>0.95555534</d>
<d>0.96000045</d>
<d>0.96444395</d>
<d>0.96888906</d>
<d>0.97333256</d>
<d>0.97777767</d>
<d>0.98222278</d>
<d>0.98666628</d>
<d>0.99111139</d>
<d>0.99555489</d>
<d>1</d>
</Subcolumn>
</XColumn>
<XAdvancedColumn Version="1" Width="77" Decimals="8" Subcolumns="1">
<Title></Title>
<Subcolumn>
<d>0</d>
<d>0.0101007</d>
<d>0.02020139</d>
<d>0.03030392</d>
<d>0.04040461</d>
<d>0.05050531</d>
<d>0.06060601</d>
<d>0.0707067</d>
<d>0.0808074</d>
<d>0.09090992</d>
<d>0.10101062</d>
<d>0.11111131</d>
<d>0.12121201</d>
<d>0.13131271</d>
<d>0.1414134</d>
<d>0.15151593</d>
<d>0.16161662</d>
<d>0.17171732</d>
<d>0.18181802</d>
<d>0.19191871</d>
<d>0.20201941</d>
<d>0.21212193</d>
<d>0.22222263</d>
<d>0.23232332</d>
<d>0.24242402</d>
<d>0.25252472</d>
<d>0.26262724</d>
<d>0.27272794</d>
<d>0.28282863</d>
<d>0.29292933</d>
<d>0.30303003</d>
<d>0.31313072</d>
<d>0.32323325</d>
<d>0.33333394</d>
<d>0.34343464</d>
<d>0.35353534</d>
<d>0.36363603</d>
<d>0.37373673</d>
<d>0.38383925</d>
<d>0.39393995</d>
<d>0.40404064</d>
<d>0.41414134</d>
<d>0.42424204</d>
<d>0.43434273</d>
<d>0.44444526</d>
<d>0.45454595</d>
<d>0.46464665</d>
<d>0.47474735</d>
<d>0.48484804</d>
<d>0.49494874</d>
<d>0.50505126</d>
<d>0.51515196</d>
<d>0.52525265</d>
<d>0.53535335</d>
<d>0.54545405</d>
<d>0.55555657</d>
<d>0.56565727</d>
<d>0.57575796</d>
<d>0.58585866</d>
<d>0.59595936</d>
<d>0.60606005</d>
<d>0.61616258</d>
<d>0.62626327</d>
<d>0.63636397</d>
<d>0.64646466</d>
<d>0.65656536</d>
<d>0.66666606</d>
<d>0.67676858</d>
<d>0.68686928</d>
<d>0.69696997</d>
<d>0.70707067</d>
<d>0.71717137</d>
<d>0.72727206</d>
<d>0.73737459</d>
<d>0.74747528</d>
<d>0.75757598</d>
<d>0.76767668</d>
<d>0.77777737</d>
<d>0.7878799</d>
<d>0.79798059</d>
<d>0.80808129</d>
<d>0.81818198</d>
<d>0.82828268</d>
<d>0.83838338</d>
<d>0.8484859</d>
<d>0.8585866</d>
<d>0.86868729</d>
<d>0.87878799</d>
<d>0.88888869</d>
<d>0.89898938</d>
<d>0.90909191</d>
<d>0.9191926</d>
<d>0.9292933</d>
<d>0.93939399</d>
<d>0.94949469</d>
<d>0.95959539</d>
<d>0.96969791</d>
<d>0.97979861</d>
<d>0.9898993</d>
<d>1</d>
<d>0</d>
<d>0.00396885</d>
<d>0.00793626</d>
<d>0.0119051</d>
<d>0.01587251</d>
<d>0.01984136</d>
<d>0.02381021</d>
<d>0.02777762</d>
<d>0.03174647</d>
<d>0.03571387</d>
<d>0.03968272</d>
<d>0.04365013</d>
<d>0.04761898</d>
<d>0.05158783</d>
<d>0.05555524</d>
<d>0.05952408</d>
<d>0.06349149</d>
<d>0.06746034</d>
<d>0.07142919</d>
<d>0.0753966</d>
<d>0.07936544</d>
<d>0.08333285</d>
<d>0.0873017</d>
<d>0.09126911</d>
<d>0.09523796</d>
<d>0.09920681</d>
<d>0.10317421</d>
<d>0.10714306</d>
<d>0.11111047</d>
<d>0.11507932</d>
<d>0.11904817</d>
<d>0.12301558</d>
<d>0.12698442</d>
<d>0.13095183</d>
<d>0.13492068</d>
<d>0.13888953</d>
<d>0.14285694</d>
<d>0.14682579</d>
<d>0.15079319</d>
<d>0.15476204</d>
<d>0.15872945</d>
<d>0.1626983</d>
<d>0.16666715</d>
<d>0.17063456</d>
<d>0.1746034</d>
<d>0.17857081</d>
<d>0.18253966</d>
<d>0.18650851</d>
<d>0.19047592</d>
<d>0.19444476</d>
<d>0.19841217</d>
<d>0.20238102</d>
<d>0.20634987</d>
<d>0.21031728</d>
<d>0.21428613</d>
<d>0.21825353</d>
<d>0.22222238</d>
<d>0.22618979</d>
<d>0.23015864</d>
<d>0.23412749</d>
<d>0.2380949</d>
<d>0.24206374</d>
<d>0.24603115</d>
<d>0.25</d>
<d>0.25396885</d>
<d>0.25793626</d>
<d>0.2619051</d>
<d>0.26587251</d>
<d>0.26984136</d>
<d>0.27380877</d>
<d>0.27777762</d>
<d>0.28174647</d>
<d>0.28571387</d>
<d>0.28968272</d>
<d>0.29365013</d>
<d>0.29761898</d>
<d>0.30158783</d>
<d>0.30555524</d>
<d>0.30952408</d>
<d>0.31349149</d>
<d>0.31746034</d>
<d>0.32142919</d>
<d>0.3253966</d>
<d>0.32936544</d>
<d>0.33333285</d>
<d>0.3373017</d>
<d>0.34126911</d>
<d>0.34523796</d>
<d>0.34920681</d>
<d>0.35317421</d>
<d>0.35714306</d>
<d>0.36111047</d>
<d>0.36507932</d>
<d>0.36904817</d>
<d>0.37301558</d>
<d>0.37698442</d>
<d>0.38095183</d>
<d>0.38492068</d>
<d>0.38888809</d>
<d>0.39285694</d>
<d>0.39682579</d>
<d>0.40079319</d>
<d>0.40476204</d>
<d>0.40872945</d>
<d>0.4126983</d>
<d>0.41666715</d>
<d>0.42063456</d>
<d>0.4246034</d>
<d>0.42857081</d>
<d>0.43253966</d>
<d>0.43650851</d>
<d>0.44047592</d>
<d>0.44444476</d>
<d>0.44841217</d>
<d>0.45238102</d>
<d>0.45634843</d>
<d>0.46031728</d>
<d>0.46428613</d>
<d>0.46825353</d>
<d>0.47222238</d>
<d>0.47618979</d>
<d>0.48015864</d>
<d>0.48412749</d>
<d>0.4880949</d>
<d>0.49206374</d>
<d>0.49603115</d>
<d>0.5</d>
<d>0.50396885</d>
<d>0.50793626</d>
<d>0.5119051</d>
<d>0.51587251</d>
<d>0.51984136</d>
<d>0.52380877</d>
<d>0.52777762</d>
<d>0.53174647</d>
<d>0.53571387</d>
<d>0.53968272</d>
<d>0.54365013</d>
<d>0.54761898</d>
<d>0.55158783</d>
<d>0.55555524</d>
<d>0.55952408</d>
<d>0.56349149</d>
<d>0.56746034</d>
<d>0.57142775</d>
<d>0.5753966</d>
<d>0.57936544</d>
<d>0.58333285</d>
<d>0.5873017</d>
<d>0.59126911</d>
<d>0.59523796</d>
<d>0.59920681</d>
<d>0.60317421</d>
<d>0.60714306</d>
<d>0.61111047</d>
<d>0.61507932</d>
<d>0.61904817</d>
<d>0.62301558</d>
<d>0.62698442</d>
<d>0.63095183</d>
<d>0.63492068</d>
<d>0.63888809</d>
<d>0.64285694</d>
<d>0.64682579</d>
<d>0.65079319</d>
<d>0.65476204</d>
<d>0.65872945</d>
<d>0.6626983</d>
<d>0.66666715</d>
<d>0.67063456</d>
<d>0.6746034</d>
<d>0.67857081</d>
<d>0.68253966</d>
<d>0.68650707</d>
<d>0.69047592</d>
<d>0.69444476</d>
<d>0.69841217</d>
<d>0.70238102</d>
<d>0.70634843</d>
<d>0.71031728</d>
<d>0.71428613</d>
<d>0.71825353</d>
<d>0.72222238</d>
<d>0.72618979</d>
<d>0.73015864</d>
<d>0.73412749</d>
<d>0.7380949</d>
<d>0.74206374</d>
<d>0.74603115</d>
<d>0.75</d>
<d>0.75396741</d>
<d>0.75793626</d>
<d>0.7619051</d>
<d>0.76587251</d>
<d>0.76984136</d>
<d>0.77380877</d>
<d>0.77777762</d>
<d>0.78174647</d>
<d>0.78571387</d>
<d>0.78968272</d>
<d>0.79365013</d>
<d>0.79761898</d>
<d>0.80158783</d>
<d>0.80555524</d>
<d>0.80952408</d>
<d>0.81349149</d>
<d>0.81746034</d>
<d>0.82142775</d>
<d>0.8253966</d>
<d>0.82936544</d>
<d>0.83333285</d>
<d>0.8373017</d>
<d>0.84126911</d>
<d>0.84523796</d>
<d>0.84920681</d>
<d>0.85317421</d>
<d>0.85714306</d>
<d>0.86111047</d>
<d>0.86507932</d>
<d>0.86904673</d>
<d>0.87301558</d>
<d>0.87698442</d>
<d>0.88095183</d>
<d>0.88492068</d>
<d>0.88888809</d>
<d>0.89285694</d>
<d>0.89682579</d>
<d>0.90079319</d>
<d>0.90476204</d>
<d>0.90872945</d>
<d>0.9126983</d>
<d>0.91666715</d>
<d>0.92063456</d>
<d>0.9246034</d>
<d>0.92857081</d>
<d>0.93253966</d>
<d>0.93650707</d>
<d>0.94047592</d>
<d>0.94444476</d>
<d>0.94841217</d>
<d>0.95238102</d>
<d>0.95634843</d>
<d>0.96031728</d>
<d>0.96428613</d>
<d>0.96825353</d>
<d>0.97222238</d>
<d>0.97618979</d>
<d>0.98015864</d>
<d>0.98412605</d>
<d>0.9880949</d>
<d>0.99206374</d>
<d>0.99603115</d>
<d>1</d>
<d>0</d>
<d>0.00444511</d>
<d>0.00888861</d>
<d>0.01333372</d>
<d>0.01777722</d>
<d>0.02222233</d>
<d>0.02666744</d>
<d>0.03111094</d>
<d>0.03555605</d>
<d>0.03999955</d>
<d>0.04444466</d>
<d>0.04888816</d>
<d>0.05333327</d>
<d>0.05777838</d>
<d>0.06222188</d>
<d>0.06666699</d>
<d>0.07111049</d>
<d>0.0755556</d>
<d>0.08000071</d>
<d>0.08444421</d>
<d>0.08888932</d>
<d>0.09333282</d>
<d>0.09777793</d>
<d>0.10222143</d>
<d>0.10666654</d>
<d>0.11111165</d>
<d>0.11555515</d>
<d>0.12000026</d>
<d>0.12444376</d>
<d>0.12888887</d>
<d>0.13333398</d>
<d>0.13777748</d>
<d>0.14222259</d>
<d>0.14666609</d>
<d>0.1511112</d>
<d>0.15555631</d>
<d>0.15999981</d>
<d>0.16444492</d>
<d>0.16888842</d>
<d>0.17333353</d>
<d>0.17777703</d>
<d>0.18222214</d>
<d>0.18666725</d>
<d>0.19111075</d>
<d>0.19555586</d>
<d>0.19999936</d>
<d>0.20444447</d>
<d>0.20888958</d>
<d>0.21333308</d>
<d>0.21777819</d>
<d>0.22222168</d>
<d>0.2266668</d>
<d>0.23111191</d>
<d>0.23555541</d>
<d>0.24000052</d>
<d>0.24444401</d>
<d>0.24888913</d>
<d>0.25333262</d>
<d>0.25777773</d>
<d>0.26222285</d>
<d>0.26666634</d>
<d>0.27111146</d>
<d>0.27555495</d>
<d>0.28000006</d>
<d>0.28444518</d>
<d>0.28888867</d>
<d>0.29333378</d>
<d>0.29777728</d>
<d>0.30222239</d>
<d>0.30666589</d>
<d>0.311111</d>
<d>0.31555611</d>
<d>0.31999961</d>
<d>0.32444472</d>
<d>0.32888822</d>
<d>0.33333333</d>
<d>0.33777844</d>
<d>0.34222194</d>
<d>0.34666705</d>
<d>0.35111055</d>
<d>0.35555566</d>
<d>0.36000077</d>
<d>0.36444427</d>
<d>0.36888938</d>
<d>0.37333288</d>
<d>0.37777799</d>
<d>0.38222149</d>
<d>0.3866666</d>
<d>0.39111171</d>
<d>0.39555521</d>
<d>0.40000032</d>
<d>0.40444382</d>
<d>0.40888893</d>
<d>0.41333404</d>
<d>0.41777754</d>
<d>0.42222265</d>
<d>0.42666615</d>
<d>0.43111126</d>
<d>0.43555476</d>
<d>0.43999987</d>
<d>0.44444498</d>
<d>0.44888848</d>
<d>0.45333359</d>
<d>0.45777709</d>
<d>0.4622222</d>
<d>0.46666731</d>
<d>0.47111081</d>
<d>0.47555592</d>
<d>0.47999942</d>
<d>0.48444453</d>
<d>0.48888964</d>
<d>0.49333314</d>
<d>0.49777825</d>
<d>0.50222175</d>
<d>0.50666686</d>
<d>0.51111036</d>
<d>0.51555547</d>
<d>0.52000058</d>
<d>0.52444408</d>
<d>0.52888919</d>
<d>0.53333269</d>
<d>0.5377778</d>
<d>0.54222291</d>
<d>0.54666641</d>
<d>0.55111152</d>
<d>0.55555502</d>
<d>0.56000013</d>
<d>0.56444524</d>
<d>0.56888874</d>
<d>0.57333385</d>
<d>0.57777735</d>
<d>0.58222246</d>
<d>0.58666596</d>
<d>0.59111107</d>
<d>0.59555618</d>
<d>0.59999968</d>
<d>0.60444479</d>
<d>0.60888829</d>
<d>0.6133334</d>
<d>0.61777851</d>
<d>0.62222201</d>
<d>0.62666712</d>
<d>0.63111062</d>
<d>0.63555573</d>
<d>0.63999923</d>
<d>0.64444434</d>
<d>0.64888945</d>
<d>0.65333295</d>
<d>0.65777806</d>
<d>0.66222156</d>
<d>0.66666667</d>
<d>0.67111178</d>
<d>0.67555528</d>
<d>0.68000039</d>
<d>0.68444389</d>
<d>0.688889</d>
<d>0.69333411</d>
<d>0.69777761</d>
<d>0.70222272</d>
<d>0.70666622</d>
<d>0.71111133</d>
<d>0.71555482</d>
<d>0.71999994</d>
<d>0.72444505</d>
<d>0.72888854</d>
<d>0.73333366</d>
<d>0.73777715</d>
<d>0.74222227</d>
<d>0.74666738</d>
<d>0.75111087</d>
<d>0.75555599</d>
<d>0.75999948</d>
<d>0.76444459</d>
<d>0.76888809</d>
<d>0.7733332</d>
<d>0.77777832</d>
<d>0.78222181</d>
<d>0.78666692</d>
<d>0.79111042</d>
<d>0.79555553</d>
<d>0.80000064</d>
<d>0.80444414</d>
<d>0.80888925</d>
<d>0.81333275</d>
<d>0.81777786</d>
<d>0.82222297</d>
<d>0.82666647</d>
<d>0.83111158</d>
<d>0.83555508</d>
<d>0.84000019</d>
<d>0.84444369</d>
<d>0.8488888</d>
<d>0.85333391</d>
<d>0.85777741</d>
<d>0.86222252</d>
<d>0.86666602</d>
<d>0.87111113</d>
<d>0.87555624</d>
<d>0.87999974</d>
<d>0.88444485</d>
<d>0.88888835</d>
<d>0.89333346</d>
<d>0.89777857</d>
<d>0.90222207</d>
<d>0.90666718</d>
<d>0.91111068</d>
<d>0.91555579</d>
<d>0.91999929</d>
<d>0.9244444</d>
<d>0.92888951</d>
<d>0.93333301</d>
<d>0.93777812</d>
<d>0.94222162</d>
<d>0.94666673</d>
<d>0.95111184</d>
<d>0.95555534</d>
<d>0.96000045</d>
<d>0.96444395</d>
<d>0.96888906</d>
<d>0.97333256</d>
<d>0.97777767</d>
<d>0.98222278</d>
<d>0.98666628</d>
<d>0.99111139</d>
<d>0.99555489</d>
<d>1</d>
<d>0</d>
<d>0.00444511</d>
<d>0.00888861</d>
<d>0.01333372</d>
<d>0.01777722</d>
<d>0.02222233</d>
<d>0.02666744</d>
<d>0.03111094</d>
<d>0.03555605</d>
<d>0.03999955</d>
<d>0.04444466</d>
<d>0.04888816</d>
<d>0.05333327</d>
<d>0.05777838</d>
<d>0.06222188</d>
<d>0.06666699</d>
<d>0.07111049</d>
<d>0.0755556</d>
<d>0.08000071</d>
<d>0.08444421</d>
<d>0.08888932</d>
<d>0.09333282</d>
<d>0.09777793</d>
<d>0.10222143</d>
<d>0.10666654</d>
<d>0.11111165</d>
<d>0.11555515</d>
<d>0.12000026</d>
<d>0.12444376</d>
<d>0.12888887</d>
<d>0.13333398</d>
<d>0.13777748</d>
<d>0.14222259</d>
<d>0.14666609</d>
<d>0.1511112</d>
<d>0.15555631</d>
<d>0.15999981</d>
<d>0.16444492</d>
<d>0.16888842</d>
<d>0.17333353</d>
<d>0.17777703</d>
<d>0.18222214</d>
<d>0.18666725</d>
<d>0.19111075</d>
<d>0.19555586</d>
<d>0.19999936</d>
<d>0.20444447</d>
<d>0.20888958</d>
<d>0.21333308</d>
<d>0.21777819</d>
<d>0.22222168</d>
<d>0.2266668</d>
<d>0.23111191</d>
<d>0.23555541</d>
<d>0.24000052</d>
<d>0.24444401</d>
<d>0.24888913</d>
<d>0.25333262</d>
<d>0.25777773</d>
<d>0.26222285</d>
<d>0.26666634</d>
<d>0.27111146</d>
<d>0.27555495</d>
<d>0.28000006</d>
<d>0.28444518</d>
<d>0.28888867</d>
<d>0.29333378</d>
<d>0.29777728</d>
<d>0.30222239</d>
<d>0.30666589</d>
<d>0.311111</d>
<d>0.31555611</d>
<d>0.31999961</d>
<d>0.32444472</d>
<d>0.32888822</d>
<d>0.33333333</d>
<d>0.33777844</d>
<d>0.34222194</d>
<d>0.34666705</d>
<d>0.35111055</d>
<d>0.35555566</d>
<d>0.36000077</d>
<d>0.36444427</d>
<d>0.36888938</d>
<d>0.37333288</d>
<d>0.37777799</d>
<d>0.38222149</d>
<d>0.3866666</d>
<d>0.39111171</d>
<d>0.39555521</d>
<d>0.40000032</d>
<d>0.40444382</d>
<d>0.40888893</d>
<d>0.41333404</d>
<d>0.41777754</d>
<d>0.42222265</d>
<d>0.42666615</d>
<d>0.43111126</d>
<d>0.43555476</d>
<d>0.43999987</d>
<d>0.44444498</d>
<d>0.44888848</d>
<d>0.45333359</d>
<d>0.45777709</d>
<d>0.4622222</d>
<d>0.46666731</d>
<d>0.47111081</d>
<d>0.47555592</d>
<d>0.47999942</d>
<d>0.48444453</d>
<d>0.48888964</d>
<d>0.49333314</d>
<d>0.49777825</d>
<d>0.50222175</d>
<d>0.50666686</d>
<d>0.51111036</d>
<d>0.51555547</d>
<d>0.52000058</d>
<d>0.52444408</d>
<d>0.52888919</d>
<d>0.53333269</d>
<d>0.5377778</d>
<d>0.54222291</d>
<d>0.54666641</d>
<d>0.55111152</d>
<d>0.55555502</d>
<d>0.56000013</d>
<d>0.56444524</d>
<d>0.56888874</d>
<d>0.57333385</d>
<d>0.57777735</d>
<d>0.58222246</d>
<d>0.58666596</d>
<d>0.59111107</d>
<d>0.59555618</d>
<d>0.59999968</d>
<d>0.60444479</d>
<d>0.60888829</d>
<d>0.6133334</d>
<d>0.61777851</d>
<d>0.62222201</d>
<d>0.62666712</d>
<d>0.63111062</d>
<d>0.63555573</d>
<d>0.63999923</d>
<d>0.64444434</d>
<d>0.64888945</d>
<d>0.65333295</d>
<d>0.65777806</d>
<d>0.66222156</d>
<d>0.66666667</d>
<d>0.67111178</d>
<d>0.67555528</d>
<d>0.68000039</d>
<d>0.68444389</d>
<d>0.688889</d>
<d>0.69333411</d>
<d>0.69777761</d>
<d>0.70222272</d>
<d>0.70666622</d>
<d>0.71111133</d>
<d>0.71555482</d>
<d>0.71999994</d>
<d>0.72444505</d>
<d>0.72888854</d>
<d>0.73333366</d>
<d>0.73777715</d>
<d>0.74222227</d>
<d>0.74666738</d>
<d>0.75111087</d>
<d>0.75555599</d>
<d>0.75999948</d>
<d>0.76444459</d>
<d>0.76888809</d>
<d>0.7733332</d>
<d>0.77777832</d>
<d>0.78222181</d>
<d>0.78666692</d>
<d>0.79111042</d>
<d>0.79555553</d>
<d>0.80000064</d>
<d>0.80444414</d>
<d>0.80888925</d>
<d>0.81333275</d>
<d>0.81777786</d>
<d>0.82222297</d>
<d>0.82666647</d>
<d>0.83111158</d>
<d>0.83555508</d>
<d>0.84000019</d>
<d>0.84444369</d>
<d>0.8488888</d>
<d>0.85333391</d>
<d>0.85777741</d>
<d>0.86222252</d>
<d>0.86666602</d>
<d>0.87111113</d>
<d>0.87555624</d>
<d>0.87999974</d>
<d>0.88444485</d>
<d>0.88888835</d>
<d>0.89333346</d>
<d>0.89777857</d>
<d>0.90222207</d>
<d>0.90666718</d>
<d>0.91111068</d>
<d>0.91555579</d>
<d>0.91999929</d>
<d>0.9244444</d>
<d>0.92888951</d>
<d>0.93333301</d>
<d>0.93777812</d>
<d>0.94222162</d>
<d>0.94666673</d>
<d>0.95111184</d>
<d>0.95555534</d>
<d>0.96000045</d>
<d>0.96444395</d>
<d>0.96888906</d>
<d>0.97333256</d>
<d>0.97777767</d>
<d>0.98222278</d>
<d>0.98666628</d>
<d>0.99111139</d>
<d>0.99555489</d>
<d>1</d>
</Subcolumn>
</XAdvancedColumn>
<YColumn Width="81" Decimals="8" Subcolumns="1">
<Title></Title>
<Subcolumn>
<d>0.5287656</d>
<d>0.21791488</d>
<d>0.33511351</d>
<d>0.51411578</d>
<d>0.54509389</d>
<d>0.49168403</d>
<d>0.36441317</d>
<d>0.34884782</d>
<d>0.4285056</d>
<d>0.34610126</d>
<d>0.4919892</d>
<d>0.27697196</d>
<d>0.41294025</d>
<d>0.42377542</d>
<d>0.25606607</d>
<d>0.19777193</d>
<d>0.21242176</d>
<d>0.39554387</d>
<d>0.48344284</d>
<d>0.41507647</d>
<d>0.30077849</d>
<d>0.51823561</d>
<d>0.43140626</d>
<d>0.41874006</d>
<d>0.61254474</d>
<d>0.70547907</d>
<d>0.67144771</d>
<d>0.46146885</d>
<d>0.33511351</d>
<d>0.30795007</d>
<d>0.42209696</d>
<d>0.30093108</d>
<d>0.39264472</d>
<d>0.54387319</d>
<d>0.32687383</d>
<d>0.34304953</d>
<d>0.38867747</d>
<d>0.51472612</d>
<d>0.53776973</d>
<d>0.64001184</d>
<d>0.49961853</d>
<d>0.44849747</d>
<d>0.63268769</d>
<d>0.90737084</d>
<d>0.81413134</d>
<d>0.71142995</d>
<d>0.38898264</d>
<d>0.33114626</d>
<d>0.29665865</d>
<d>0.51487871</d>
<d>0.4723025</d>
<d>0.46238437</d>
<d>0.48924113</d>
<d>0.1774764</d>
<d>0.33099367</d>
<d>0.74698566</d>
<d>0.61162771</d>
<d>0.34930558</d>
<d>0.46223178</d>
<d>0.52571387</d>
<d>0.46284213</d>
<d>0.41736678</d>
<d>0.49565128</d>
<d>0.67434837</d>
<d>1</d>
<d>0.63604459</d>
<d>0.38776195</d>
<d>0.55608164</d>
<d>0.44987075</d>
<d>0.42896336</d>
<d>0.55852302</d>
<d>0.48969889</d>
<d>0.42026592</d>
<d>0.30230436</d>
<d>0.46039923</d>
<d>0.29757417</d>
<d>0.51304767</d>
<d>0.69159217</d>
<d>0.44407095</d>
<d>0.3398437</d>
<d>0.39935853</d>
<d>0.28155107</d>
<d>0.51670975</d>
<d>0.40851524</d>
<d>0.3547987</d>
<d>0.44910782</d>
<d>0.58690716</d>
<d>0.71692307</d>
<d>0.75537943</d>
<d>0.35678384</d>
<d>0.32550055</d>
<d>0.25331951</d>
<d>0.28383987</d>
<d>0.30444057</d>
<d>0.34762713</d>
<d>0.43079591</d>
<d>0.5081649</d>
<d>0.379063</d>
<d>0.39310248</d>
<d>0.34747454</d>
</Subcolumn>
</YColumn>
<YColumn Width="81" Decimals="8" Subcolumns="1">
<Title></Title>
<Subcolumn>
<d></d>
<d></d>
<d></d>
<d></d>
<d></d>
<d></d>
<d></d>
<d></d>
<d></d>
<d></d>
<d></d>
<d></d>
<d></d>
<d></d>
<d></d>
<d></d>
<d></d>
<d></d>
<d></d>
<d></d>
<d></d>
<d></d>
<d></d>
<d></d>
<d></d>
<d></d>
<d></d>
<d></d>
<d></d>
<d></d>
<d></d>
<d></d>
<d></d>
<d></d>
<d></d>
<d></d>
<d></d>
<d></d>
<d></d>
<d></d>
<d></d>
<d></d>
<d></d>
<d></d>
<d></d>
<d></d>
<d></d>
<d></d>
<d></d>
<d></d>
<d></d>
<d></d>
<d></d>
<d></d>
<d></d>
<d></d>
<d></d>
<d></d>
<d></d>
<d></d>
<d></d>
<d></d>
<d></d>
<d></d>
<d></d>
<d></d>
<d></d>
<d></d>
<d></d>
<d></d>
<d></d>
<d></d>
<d></d>
<d></d>
<d></d>
<d></d>
<d></d>
<d></d>
<d></d>
<d></d>
<d></d>
<d></d>
<d></d>
<d></d>
<d></d>
<d></d>
<d></d>
<d></d>
<d></d>
<d></d>
<d></d>
<d></d>
<d></d>
<d></d>
<d></d>
<d></d>
<d></d>
<d></d>
<d></d>
<d></d>
<d>0.5256472</d>
<d>0.28301941</d>
<d>0.4884051</d>
<d>0.49813395</d>
<d>0.41814578</d>
<d>0.55157694</d>
<d>0.41117</d>
<d>0.43195497</d>
<d>0.54093916</d>
<d>0.58263612</d>
<d>0.41343248</d>
<d>0.45906303</d>
<d>0.61265934</d>
<d>0.47659994</d>
<d>0.53592142</d>
<d>0.5236366</d>
<d>0.56550659</d>
<d>0.38231416</d>
<d>0.34596128</d>
<d>0.28729248</d>
<d>0.40606684</d>
<d>0.40396864</d>
<d>0.43170529</d>
<d>0.43778746</d>
<d>0.47086819</d>
<d>0.42985019</d>
<d>0.76283893</d>
<d>0.77059223</d>
<d>0.95665601</d>
<d>0.73226817</d>
<d>0.58872049</d>
<d>0.46173288</d>
<d>0.4373779</d>
<d>0.55010732</d>
<d>0.77007315</d>
<d>0.37774103</d>
<d>0.48229007</d>
<d>0.3571269</d>
<d>0.40174121</d>
<d>0.4833326</d>
<d>0.43566078</d>
<d>0.48363704</d>
<d>0.53294713</d>
<d>0.56697621</d>
<d>0.46175698</d>
<d>0.50866223</d>
<d>0.54006746</d>
<d>0.43308073</d>
<d>0.4162863</d>
<d>0.55092864</d>
<d>0.60035919</d>
<d>0.41310833</d>
<d>0.49381269</d>
<d>0.63638136</d>
<d>0.5891191</d>
<d>0.56003329</d>
<d>0.49211748</d>
<d>0.49723816</d>
<d>0.42862587</d>
<d>0.38029261</d>
<d>0.40555872</d>
<d>0.47946034</d>
<d>0.33785536</d>
<d>0.44899032</d>
<d>0.48936002</d>
<d>0.55821105</d>
<d>0.45144772</d>
<d>0.39724254</d>
<d>0.37198519</d>
<d>0.35877612</d>
<d>0.35556967</d>
<d>0.48118183</d>
<d>0.36428884</d>
<d>0.37221516</d>
<d>0.63066056</d>
<d>0.36587674</d>
<d>0.30666039</d>
<d>0.60527837</d>
<d>0.76800999</d>
<d>0.70337947</d>
<d>0.40725831</d>
<d>0.37948443</d>
<d>0.41608261</d>
<d>0.49806168</d>
<d>0.42100399</d>
<d>0.60183758</d>
<d>0.61200228</d>
<d>0.57305182</d>
<d>0.4506921</d>
<d>0.49660739</d>
<d>0.5234132</d>
<d>0.23970389</d>
<d>0.49738929</d>
<d>0.40325025</d>
<d>0.52732489</d>
<d>0.59755793</d>
<d>0.52639187</d>
<d>0.39325419</d>
<d>0.46480792</d>
<d>0.40496299</d>
<d>0.31249945</d>
<d>0.38206448</d>
<d>0.53011739</d>
<d>1</d>
<d>0.5420693</d>
<d>0.41248631</d>
<d>0.55968286</d>
<d>0.63676902</d>
<d>0.50419204</d>
<d>0.37018485</d>
<d>0.41620965</d>
<d>0.4895659</d>
<d>0.42343729</d>
<d>0.29653511</d>
<d>0.43684787</d>
<d>0.50430812</d>
<d>0.48601559</d>
<d>0.42172456</d>
<d>0.38579876</d>
<d>0.55430812</d>
<d>0.31929125</d>
<d>0.35540322</d>
<d>0.40608218</d>
<d>0.40255377</d>
<d>0.28872706</d>
<d>0.40410005</d>
<d>0.17521573</d>
<d>0.40723422</d>
<d>0.48336546</d>
<d>0.43801524</d>
<d>0.29644093</d>
<d>0.25088484</d>
<d>0.41285864</d>
<d>0.18697709</d>
<d>0.414924</d>
<d>0.63225065</d>
<d>0.35636252</d>
<d>0.32577204</d>
<d>0.42001183</d>
<d>0.40953174</d>
<d>0.33447808</d>
<d>0.37121644</d>
<d>0.41082833</d>
<d>0.5243287</d>
<d>0.54888957</d>
<d>0.59682641</d>
<d>0.56628849</d>
<d>0.50009418</d>
<d>0.46033335</d>
<d>0.33055981</d>
<d>0.28323623</d>
<d>0.46099041</d>
<d>0.53612072</d>
<d>0.47781988</d>
<d>0.45128784</d>
<d>0.5041789</d>
<d>0.60063954</d>
<d>0.443298</d>
<d>0.37885146</d>
<d>0.58164396</d>
<d>0.5770774</d>
<d>0.64299794</d>
<d>0.83987253</d>
<d>0.69745499</d>
<d>0.60335976</d>
<d>0.38718297</d>
<d>0.43656533</d>
<d>0.30418328</d>
<d>0.35773139</d>
<d>0.38865916</d>
<d>0.38059486</d>
<d>0.36540584</d>
<d>0.33950458</d>
<d>0.34822156</d>
<d>0.42065574</d>
<d>0.59000175</d>
<d>0.70572955</d>
<d>0.40970476</d>
<d>0.49557799</d>
<d>0.22230058</d>
<d>0.44250953</d>
<d>0.7042227</d>
<d>0.46318498</d>
<d>0.59934951</d>
<d>0.37055719</d>
<d>0.43781813</d>
<d>0.3937886</d>
<d>0.35564633</d>
<d>0.45885935</d>
<d>0.43803934</d>
<d>0.41735074</d>
<d>0.40230409</d>
<d>0.37099304</d>
<d>0.45150467</d>
<d>0.60315169</d>
<d>0.51345438</d>
<d>0.57080249</d>
<d>0.71521311</d>
<d>0.7285755</d>
<d>0.62930264</d>
<d>0.65565728</d>
<d>0.60982741</d>
<d>0.57811994</d>
<d>0.43060362</d>
<d>0.39522975</d>
<d>0.40476368</d>
<d>0.35143677</d>
<d>0.38015463</d>
<d>0.33846861</d>
<d>0.62355118</d>
<d>0.64489027</d>
<d>0.67485435</d>
<d>0.58259013</d>
<d>0.53180604</d>
<d>0.59889614</d>
<d>0.49501073</d>
<d>0.52386</d>
<d>0.41884226</d>
<d>0.75890972</d>
<d>0.49344036</d>
<d>0.25972885</d>
<d>0.18784441</d>
<d>0.25398397</d>
<d>0.26663454</d>
<d>0.40424022</d>
<d>0.43848614</d>
<d>0.36816111</d>
<d>0.26763327</d>
<d>0.4185203</d>
<d>0.27577861</d>
<d>0.52571291</d>
<d>0.3601647</d>
<d>0.38658066</d>
<d>0.50578431</d>
<d>0.38127382</d>
<d>0.28718297</d>
<d>0.29111656</d>
<d>0.40742039</d>
<d>0.39369442</d>
<d>0.32820097</d>
<d>0.41335582</d>
<d>0.52487406</d>
<d>0.53711945</d>
<d>0.48050287</d>
<d>0.40255158</d>
<d>0.42627798</d>
<d>0.60068991</d>
<d>0.69002584</d>
<d>0.52728547</d>
<d>0.57640501</d>
<d>0.62626265</d>
<d>0.57188664</d>
<d>0.37233344</d>
</Subcolumn>
</YColumn>
<YColumn Width="81" Decimals="8" Subcolumns="1">
<Title></Title>
<Subcolumn>
<d></d>
<d></d>
<d></d>
<d></d>
<d></d>
<d></d>
<d></d>
<d></d>
<d></d>
<d></d>
<d></d>
<d></d>
<d></d>
<d></d>
<d></d>
<d></d>
<d></d>
<d></d>
<d></d>
<d></d>
<d></d>
<d></d>
<d></d>
<d></d>
<d></d>
<d></d>
<d></d>
<d></d>
<d></d>
<d></d>
<d></d>
<d></d>
<d></d>
<d></d>
<d></d>
<d></d>
<d></d>
<d></d>
<d></d>
<d></d>
<d></d>
<d></d>
<d></d>
<d></d>
<d></d>
<d></d>
<d></d>
<d></d>
<d></d>
<d></d>
<d></d>
<d></d>
<d></d>
<d></d>
<d></d>
<d></d>
<d></d>
<d></d>
<d></d>
<d></d>
<d></d>
<d></d>
<d></d>
<d></d>
<d></d>
<d></d>
<d></d>
<d></d>
<d></d>
<d></d>
<d></d>
<d></d>
<d></d>
<d></d>
<d></d>
<d></d>
<d></d>
<d></d>
<d></d>
<d></d>
<d></d>
<d></d>
<d></d>
<d></d>
<d></d>
<d></d>
<d></d>
<d></d>
<d></d>
<d></d>
<d></d>
<d></d>
<d></d>
<d></d>
<d></d>
<d></d>
<d></d>
<d></d>
<d></d>
<d></d>
<d></d>
<d></d>
<d></d>
<d></d>
<d></d>
<d></d>
<d></d>
<d></d>
<d></d>
<d></d>
<d></d>
<d></d>
<d></d>
<d></d>
<d></d>
<d></d>
<d></d>
<d></d>
<d></d>
<d></d>
<d></d>
<d></d>
<d></d>
<d></d>
<d></d>
<d></d>
<d></d>
<d></d>
<d></d>
<d></d>
<d></d>
<d></d>
<d></d>
<d></d>
<d></d>
<d></d>
<d></d>
<d></d>
<d></d>
<d></d>
<d></d>
<d></d>
<d></d>
<d></d>
<d></d>
<d></d>
<d></d>
<d></d>
<d></d>
<d></d>
<d></d>
<d></d>
<d></d>
<d></d>
<d></d>
<d></d>
<d></d>
<d></d>
<d></d>
<d></d>
<d></d>
<d></d>
<d></d>
<d></d>
<d></d>
<d></d>
<d></d>
<d></d>
<d></d>
<d></d>
<d></d>
<d></d>
<d></d>
<d></d>
<d></d>
<d></d>
<d></d>
<d></d>
<d></d>
<d></d>
<d></d>
<d></d>
<d></d>
<d></d>
<d></d>
<d></d>
<d></d>
<d></d>
<d></d>
<d></d>
<d></d>
<d></d>
<d></d>
<d></d>
<d></d>
<d></d>
<d></d>
<d></d>
<d></d>
<d></d>
<d></d>
<d></d>
<d></d>
<d></d>
<d></d>
<d></d>
<d></d>
<d></d>
<d></d>
<d></d>
<d></d>
<d></d>
<d></d>
<d></d>
<d></d>
<d></d>
<d></d>
<d></d>
<d></d>
<d></d>
<d></d>
<d></d>
<d></d>
<d></d>
<d></d>
<d></d>
<d></d>
<d></d>
<d></d>
<d></d>
<d></d>
<d></d>
<d></d>
<d></d>
<d></d>
<d></d>
<d></d>
<d></d>
<d></d>
<d></d>
<d></d>
<d></d>
<d></d>
<d></d>
<d></d>
<d></d>
<d></d>
<d></d>
<d></d>
<d></d>
<d></d>
<d></d>
<d></d>
<d></d>
<d></d>
<d></d>
<d></d>
<d></d>
<d></d>
<d></d>
<d></d>
<d></d>
<d></d>
<d></d>
<d></d>
<d></d>
<d></d>
<d></d>
<d></d>
<d></d>
<d></d>
<d></d>
<d></d>
<d></d>
<d></d>
<d></d>
<d></d>
<d></d>
<d></d>
<d></d>
<d></d>
<d></d>
<d></d>
<d></d>
<d></d>
<d></d>
<d></d>
<d></d>
<d></d>
<d></d>
<d></d>
<d></d>
<d></d>
<d></d>
<d></d>
<d></d>
<d></d>
<d></d>
<d></d>
<d></d>
<d></d>
<d></d>
<d></d>
<d></d>
<d></d>
<d></d>
<d></d>
<d></d>
<d></d>
<d></d>
<d></d>
<d></d>
<d></d>
<d></d>
<d></d>
<d></d>
<d></d>
<d></d>
<d></d>
<d></d>
<d></d>
<d></d>
<d></d>
<d></d>
<d></d>
<d></d>
<d></d>
<d></d>
<d></d>
<d></d>
<d></d>
<d></d>
<d></d>
<d></d>
<d></d>
<d></d>
<d></d>
<d></d>
<d></d>
<d></d>
<d></d>
<d></d>
<d></d>
<d></d>
<d></d>
<d></d>
<d></d>
<d></d>
<d></d>
<d></d>
<d></d>
<d></d>
<d></d>
<d>0.48476387</d>
<d>0.46973619</d>
<d>0.66476154</d>
<d>0.53285245</d>
<d>0.18358977</d>
<d>0.28848783</d>
<d>0.33892266</d>
<d>0.43425148</d>
<d>0.2318868</d>
<d>0.25463677</d>
<d>0.52009831</d>
<d>0.68968326</d>
<d>0.3516671</d>
<d>0.34970381</d>
<d>0.3041457</d>
<d>0.17322067</d>
<d>0.31316231</d>
<d>0.37238591</d>
<d>0.33584441</d>
<d>0.2861852</d>
<d>0.37510059</d>
<d>0.37692815</d>
<d>0.52074305</d>
<d>0.4878906</d>
<d>0.28144906</d>
<d>0.26931542</d>
<d>0.25097195</d>
<d>0.19638754</d>
<d>0.43924454</d>
<d>0.21245261</d>
<d>0.20424556</d>
<d>0.33064774</d>
<d>0.28827453</d>
<d>0.2144353</d>
<d>0.27937911</d>
<d>0.20618462</d>
<d>0.32770038</d>
<d>0.4713553</d>
<d>0.40003199</d>
<d>0.33447253</d>
<d>0.36001958</d>
<d>0.46506307</d>
<d>0.46775351</d>
<d>0.34290257</d>
<d>0.57765917</d>
<d>0.36648149</d>
<d>0.25138885</d>
<d>0.22774207</d>
<d>0.34706669</d>
<d>0.55555394</d>
<d>0.72176008</d>
<d>0.28486179</d>
<d>0.56129354</d>
<d>1</d>
<d>0.60793268</d>
<d>0.47787053</d>
<d>0.23592488</d>
<d>0.15320962</d>
<d>0.24461185</d>
<d>0.39801538</d>
<d>0.35226336</d>
<d>0.28354324</d>
<d>0.20186052</d>
<d>0.1494624</d>
<d>0.28403285</d>
<d>0.26758966</d>
<d>0.18630445</d>
<d>0.206936</d>
<d>0.20396925</d>
<d>0.11954762</d>
<d>0.12690149</d>
<d>0.24259038</d>
<d>0.23020467</d>
<d>0.65010713</d>
<d>0.4152148</d>
<d>0.19390555</d>
<d>0.09669585</d>
<d>0.02805813</d>
<d>0.32131604</d>
<d>0.26100656</d>
<d>0.34170521</d>
<d>0.48460875</d>
<d>0.3115432</d>
<d>0.31980842</d>
<d>0.31084514</d>
<d>0.15986543</d>
<d>0.24713262</d>
<d>0.38207149</d>
<d>0.52405398</d>
<d>0.41139001</d>
<d>0.18227122</d>
<d>0.15772762</d>
<d>0.26360975</d>
<d>0.3703596</d>
<d>0.30210484</d>
<d>0.21544846</d>
<d>0.09111137</d>
<d>0.15102334</d>
<d>0.12642642</d>
<d>0.24866448</d>
<d>0.54939744</d>
<d>0.46356515</d>
<d>0.09364184</d>
<d>0.21867213</d>
<d>0.39621206</d>
<d>0.77885557</d>
<d>0.36402373</d>
<d>0.37095586</d>
<d>0.53455882</d>
<d>0.49082342</d>
<d>0.33071561</d>
<d>0.27707649</d>
<d>0.2667801</d>
<d>0.51325344</d>
<d>0.65661751</d>
<d>0.51126591</d>
<d>0.37914837</d>
<d>0.21608834</d>
<d>0.30993863</d>
<d>0.37364145</d>
<d>0.23139234</d>
<d>0.31781604</d>
<d>0.29174544</d>
<d>0.13653374</d>
<d>0.11648876</d>
<d>0.19929128</d>
<d>0.36648149</d>
<d>0.17447136</d>
<d>0.55743967</d>
<d>0.49453671</d>
<d>0.64290354</d>
<d>0.30848918</d>
<d>0.41526812</d>
<d>0.40727921</d>
<d>0.36072249</d>
<d>0.28116305</d>
<d>0.16740351</d>
<d>0.39437965</d>
<d>0.51191065</d>
<d>0.29535693</d>
<d>0.38522731</d>
<d>0.43799385</d>
<d>0.40089972</d>
<d>0.47113231</d>
<d>0.19375042</d>
<d>0.26952871</d>
<d>0.11509264</d>
<d>0.37278826</d>
<d>0.15858081</d>
<d>0.36412069</d>
<d>0.27470114</d>
<d>0.32488875</d>
<d>0.25362846</d>
<d>0.14907459</d>
<d>0.18938755</d>
<d>0.21286466</d>
<d>0.36306875</d>
<d>0.41389624</d>
<d>0.30424265</d>
<d>0.18082177</d>
<d>0.20338753</d>
<d>0.20262645</d>
<d>0.26347886</d>
<d>0.30132922</d>
<d>0.4440534</d>
<d>0.41237408</d>
<d>0.26194701</d>
<d>0.23353984</d>
<d>0.36169687</d>
<d>0.450016</d>
<d>0.14715492</d>
<d>0.23912432</d>
<d>0.24238194</d>
<d>0.29724266</d>
<d>0.36382013</d>
<d>0.30162978</d>
<d>0.29688879</d>
<d>0.30722395</d>
<d>0.13443472</d>
<d>0.19624211</d>
<d>0.16675877</d>
<d>0.45791765</d>
<d>0.40845234</d>
<d>0.24600312</d>
<d>0.24427736</d>
<d>0.37079104</d>
<d>0.29005846</d>
<d>0.21881272</d>
<d>0.19319779</d>
<d>0.18265903</d>
<d>0.11138904</d>
<d>0.37862482</d>
<d>0.65322901</d>
<d>0.66883841</d>
<d>0.31765122</d>
<d>0.20295609</d>
<d>0.45156724</d>
<d>0.59377272</d>
<d>0.34616019</d>
<d>0.33827308</d>
<d>0.58171665</d>
<d>0.40446274</d>
<d>0.87557566</d>
<d>0.59021456</d>
<d>0.30086385</d>
<d>0.30830982</d>
<d>0.17236264</d>
<d>0.24432099</d>
<d>0.2332199</d>
<d>0.36593855</d>
<d>0.37617676</d>
<d>0.29458131</d>
<d>0.49658726</d>
<d>0.71724208</d>
<d>0.40656176</d>
<d>0.3005536</d>
<d>0.4674675</d>
<d>0.46360878</d>
<d>0.61293059</d>
<d>0.38879517</d>
<d>0.21587989</d>
<d>0.22098446</d>
<d>0.17332732</d>
<d>0.39186372</d>
<d>0.09845069</d>
<d>0.3878111</d>
</Subcolumn>
</YColumn>
<YColumn Width="81" Decimals="8" Subcolumns="1">
<Title></Title>
<Subcolumn>
<d></d>
<d></d>
<d></d>
<d></d>
<d></d>
<d></d>
<d></d>
<d></d>
<d></d>
<d></d>
<d></d>
<d></d>
<d></d>
<d></d>
<d></d>
<d></d>
<d></d>
<d></d>
<d></d>
<d></d>
<d></d>
<d></d>
<d></d>
<d></d>
<d></d>
<d></d>
<d></d>
<d></d>
<d></d>
<d></d>
<d></d>
<d></d>
<d></d>
<d></d>
<d></d>
<d></d>
<d></d>
<d></d>
<d></d>
<d></d>
<d></d>
<d></d>
<d></d>
<d></d>
<d></d>
<d></d>
<d></d>
<d></d>
<d></d>
<d></d>
<d></d>
<d></d>
<d></d>
<d></d>
<d></d>
<d></d>
<d></d>
<d></d>
<d></d>
<d></d>
<d></d>
<d></d>
<d></d>
<d></d>
<d></d>
<d></d>
<d></d>
<d></d>
<d></d>
<d></d>
<d></d>
<d></d>
<d></d>
<d></d>
<d></d>
<d></d>
<d></d>
<d></d>
<d></d>
<d></d>
<d></d>
<d></d>
<d></d>
<d></d>
<d></d>
<d></d>
<d></d>
<d></d>
<d></d>
<d></d>
<d></d>
<d></d>
<d></d>
<d></d>
<d></d>
<d></d>
<d></d>
<d></d>
<d></d>
<d></d>
<d></d>
<d></d>
<d></d>
<d></d>
<d></d>
<d></d>
<d></d>
<d></d>
<d></d>
<d></d>
<d></d>
<d></d>
<d></d>
<d></d>
<d></d>
<d></d>
<d></d>
<d></d>
<d></d>
<d></d>
<d></d>
<d></d>
<d></d>
<d></d>
<d></d>
<d></d>
<d></d>
<d></d>
<d></d>
<d></d>
<d></d>
<d></d>
<d></d>
<d></d>
<d></d>
<d></d>
<d></d>
<d></d>
<d></d>
<d></d>
<d></d>
<d></d>
<d></d>
<d></d>
<d></d>
<d></d>
<d></d>
<d></d>
<d></d>
<d></d>
<d></d>
<d></d>
<d></d>
<d></d>
<d></d>
<d></d>
<d></d>
<d></d>
<d></d>
<d></d>
<d></d>
<d></d>
<d></d>
<d></d>
<d></d>
<d></d>
<d></d>
<d></d>
<d></d>
<d></d>
<d></d>
<d></d>
<d></d>
<d></d>
<d></d>
<d></d>
<d></d>
<d></d>
<d></d>
<d></d>
<d></d>
<d></d>
<d></d>
<d></d>
<d></d>
<d></d>
<d></d>
<d></d>
<d></d>
<d></d>
<d></d>
<d></d>
<d></d>
<d></d>
<d></d>
<d></d>
<d></d>
<d></d>
<d></d>
<d></d>
<d></d>
<d></d>
<d></d>
<d></d>
<d></d>
<d></d>
<d></d>
<d></d>
<d></d>
<d></d>
<d></d>
<d></d>
<d></d>
<d></d>
<d></d>
<d></d>
<d></d>
<d></d>
<d></d>
<d></d>
<d></d>
<d></d>
<d></d>
<d></d>
<d></d>
<d></d>
<d></d>
<d></d>
<d></d>
<d></d>
<d></d>
<d></d>
<d></d>
<d></d>
<d></d>
<d></d>
<d></d>
<d></d>
<d></d>
<d></d>
<d></d>
<d></d>
<d></d>
<d></d>
<d></d>
<d></d>
<d></d>
<d></d>
<d></d>
<d></d>
<d></d>
<d></d>
<d></d>
<d></d>
<d></d>
<d></d>
<d></d>
<d></d>
<d></d>
<d></d>
<d></d>
<d></d>
<d></d>
<d></d>
<d></d>
<d></d>
<d></d>
<d></d>
<d></d>
<d></d>
<d></d>
<d></d>
<d></d>
<d></d>
<d></d>
<d></d>
<d></d>
<d></d>
<d></d>
<d></d>
<d></d>
<d></d>
<d></d>
<d></d>
<d></d>
<d></d>
<d></d>
<d></d>
<d></d>
<d></d>
<d></d>
<d></d>
<d></d>
<d></d>
<d></d>
<d></d>
<d></d>
<d></d>
<d></d>
<d></d>
<d></d>
<d></d>
<d></d>
<d></d>
<d></d>
<d></d>
<d></d>
<d></d>
<d></d>
<d></d>
<d></d>
<d></d>
<d></d>
<d></d>
<d></d>
<d></d>
<d></d>
<d></d>
<d></d>
<d></d>
<d></d>
<d></d>
<d></d>
<d></d>
<d></d>
<d></d>
<d></d>
<d></d>
<d></d>
<d></d>
<d></d>
<d></d>
<d></d>
<d></d>
<d></d>
<d></d>
<d></d>
<d></d>
<d></d>
<d></d>
<d></d>
<d></d>
<d></d>
<d></d>
<d></d>
<d></d>
<d></d>
<d></d>
<d></d>
<d></d>
<d></d>
<d></d>
<d></d>
<d></d>
<d></d>
<d></d>
<d></d>
<d></d>
<d></d>
<d></d>
<d></d>
<d></d>
<d></d>
<d></d>
<d></d>
<d></d>
<d></d>
<d></d>
<d></d>
<d></d>
<d></d>
<d></d>
<d></d>
<d></d>
<d></d>
<d></d>
<d></d>
<d></d>
<d></d>
<d></d>
<d></d>
<d></d>
<d></d>
<d></d>
<d></d>
<d></d>
<d></d>
<d></d>
<d></d>
<d></d>
<d></d>
<d></d>
<d></d>
<d></d>
<d></d>
<d></d>
<d></d>
<d></d>
<d></d>
<d></d>
<d></d>
<d></d>
<d></d>
<d></d>
<d></d>
<d></d>
<d></d>
<d></d>
<d></d>
<d></d>
<d></d>
<d></d>
<d></d>
<d></d>
<d></d>
<d></d>
<d></d>
<d></d>
<d></d>
<d></d>
<d></d>
<d></d>
<d></d>
<d></d>
<d></d>
<d></d>
<d></d>
<d></d>
<d></d>
<d></d>
<d></d>
<d></d>
<d></d>
<d></d>
<d></d>
<d></d>
<d></d>
<d></d>
<d></d>
<d></d>
<d></d>
<d></d>
<d></d>
<d></d>
<d></d>
<d></d>
<d></d>
<d></d>
<d></d>
<d></d>
<d></d>
<d></d>
<d></d>
<d></d>
<d></d>
<d></d>
<d></d>
<d></d>
<d></d>
<d></d>
<d></d>
<d></d>
<d></d>
<d></d>
<d></d>
<d></d>
<d></d>
<d></d>
<d></d>
<d></d>
<d></d>
<d></d>
<d></d>
<d></d>
<d></d>
<d></d>
<d></d>
<d></d>
<d></d>
<d></d>
<d></d>
<d></d>
<d></d>
<d></d>
<d></d>
<d></d>
<d></d>
<d></d>
<d></d>
<d></d>
<d></d>
<d></d>
<d></d>
<d></d>
<d></d>
<d></d>
<d></d>
<d></d>
<d></d>
<d></d>
<d></d>
<d></d>
<d></d>
<d></d>
<d></d>
<d></d>
<d></d>
<d></d>
<d></d>
<d></d>
<d></d>
<d></d>
<d></d>
<d></d>
<d></d>
<d></d>
<d></d>
<d></d>
<d></d>
<d></d>
<d></d>
<d></d>
<d></d>
<d></d>
<d></d>
<d></d>
<d></d>
<d></d>
<d></d>
<d></d>
<d></d>
<d></d>
<d></d>
<d></d>
<d></d>
<d></d>
<d></d>
<d></d>
<d></d>
<d></d>
<d></d>
<d></d>
<d></d>
<d></d>
<d></d>
<d></d>
<d></d>
<d></d>
<d></d>
<d></d>
<d></d>
<d></d>
<d></d>
<d></d>
<d></d>
<d></d>
<d></d>
<d></d>
<d></d>
<d></d>
<d></d>
<d></d>
<d></d>
<d></d>
<d></d>
<d></d>
<d></d>
<d></d>
<d></d>
<d></d>
<d></d>
<d></d>
<d></d>
<d></d>
<d></d>
<d></d>
<d></d>
<d></d>
<d></d>
<d>0.57385516</d>
<d>0.64589038</d>
<d>0.46363808</d>
<d>0.54022725</d>
<d>0.68644554</d>
<d>0.57476513</d>
<d>0.47653752</d>
<d>0.75093866</d>
<d>0.75215196</d>
<d>0.33185224</d>
<d>0.58033152</d>
<d>0.69635274</d>
<d>0.71503992</d>
<d>0.48530111</d>
<d>0.49912282</d>
<d>0.78518142</d>
<d>0.56714105</d>
<d>0.59089046</d>
<d>0.58762768</d>
<d>0.56665328</d>
<d>0.547134</d>
<d>0.38446656</d>
<d>0.34803496</d>
<d>0.71481038</d>
<d>0.38322457</d>
<d>0.55158958</d>
<d>0.61127871</d>
<d>0.63943861</d>
<d>0.51488744</d>
<d>0.57956092</d>
<d>0.48367792</d>
<d>0.72878785</d>
<d>0.66939794</d>
<d>0.6018388</d>
<d>0.4338468</d>
<d>0.30018773</d>
<d>0.57615058</d>
<d>0.6861996</d>
<d>0.43102671</d>
<d>0.43215802</d>
<d>0.53468545</d>
<d>0.2848822</d>
<d>0.6200546</d>
<d>0.76795347</d>
<d>0.60915135</d>
<d>0.72141791</d>
<d>0.56541949</d>
<d>0.83049548</d>
<d>0.51566625</d>
<d>0.52672935</d>
<d>0.41141316</d>
<d>0.43747848</d>
<d>0.434228</d>
<d>0.33322129</d>
<d>0.23085373</d>
<d>0.40321523</d>
<d>0.55581971</d>
<d>0.40464987</d>
<d>0.35278156</d>
<d>0.28807529</d>
<d>0.35888902</d>
<d>0.45362431</d>
<d>0.62769507</d>
<d>0.44563952</d>
<d>0.24844649</d>
<d>0.33378695</d>
<d>0.37579315</d>
<d>0.34871129</d>
<d>0.44718483</d>
<d>0.64836615</d>
<d>0.5423792</d>
<d>0.59489925</d>
<d>0.62533816</d>
<d>0.45668623</d>
<d>0.509526</d>
<d>0.66038842</d>
<d>0.51124346</d>
<d>0.62000951</d>
<d>0.47099982</d>
<d>0.5815981</d>
<d>0.31850601</d>
<d>0.2777459</d>
<d>0.31559574</d>
<d>0.4540547</d>
<d>0.3993663</d>
<d>0.5990556</d>
<d>0.51978161</d>
<d>0.51807234</d>
<d>0.39466889</d>
<d>0.35788067</d>
<d>0.4508862</d>
<d>0.54982702</d>
<d>0.62369448</d>
<d>0.37469873</d>
<d>0.52865177</d>
<d>0.59753898</d>
<d>0.81203374</d>
<d>0.62248119</d>
<d>0.54343264</d>
<d>0.51712548</d>
<d>0.54956469</d>
<d>0.39794396</d>
<d>0.70116083</d>
<d>0.77680313</d>
<d>0.70553442</d>
<d>0.71686396</d>
<d>0.77110147</d>
<d>0.76928153</d>
<d>0.29479759</d>
<d>0.13531095</d>
<d>0.53154974</d>
<d>0.71763047</d>
<d>0.45147645</d>
<d>0.45354642</d>
<d>0.53111525</d>
<d>0.35008034</d>
<d>0.35038776</d>
<d>0.46564247</d>
<d>0.33454936</d>
<d>0.76913807</d>
<d>0.88902051</d>
<d>0.60591727</d>
<d>0.55443836</d>
<d>0.66231903</d>
<d>0.50335705</d>
<d>0.45341526</d>
<d>0.49548294</d>
<d>0.2753562</d>
<d>0.28944434</d>
<d>0.23085373</d>
<d>0.39390648</d>
<d>0.63693004</d>
<d>0.38293355</d>
<d>0.35531882</d>
<d>0.43544539</d>
<d>0.24593793</d>
<d>0.36796413</d>
<d>0.53293519</d>
<d>0.54222754</d>
<d>0.63949599</d>
<d>0.455641</d>
<d>0.43255972</d>
<d>0.41349133</d>
<d>0.29592891</d>
<d>0.33447558</d>
<d>0.29654375</d>
<d>0.40128052</d>
<d>0.43583889</d>
<d>0.29731846</d>
<d>0.6608516</d>
<d>0.54197341</d>
<d>0.47984949</d>
<d>0.51994966</d>
<d>0.58566018</d>
<d>0.43427309</d>
<d>0.71109262</d>
<d>1</d>
<d>0.57940106</d>
<d>0.47692282</d>
<d>0.4326335</d>
<d>0.3751824</d>
<d>0.41573757</d>
<d>0.52433966</d>
<d>0.48523143</d>
<d>0.60254792</d>
<d>0.55472529</d>
<d>0.7301856</d>
<d>0.6438245</d>
<d>0.57972078</d>
<d>0.33929596</d>
<d>0.53994852</d>
<d>0.53155384</d>
<d>0.87150973</d>
<d>0.81532931</d>
<d>0.7325671</d>
<d>0.50402109</d>
<d>0.59483366</d>
<d>0.58099556</d>
<d>0.39671837</d>
<d>0.58727517</d>
<d>0.61484481</d>
<d>0.71999967</d>
<d>0.70182486</d>
<d>0.6767105</d>
<d>0.90523192</d>
<d>0.56879294</d>
<d>0.48706776</d>
<d>0.40717893</d>
<d>0.43911397</d>
<d>0.57615058</d>
<d>0.62537096</d>
<d>0.75850125</d>
<d>0.53264826</d>
<d>0.45966208</d>
<d>0.52327802</d>
<d>0.77880343</d>
<d>0.67106212</d>
<d>0.70639521</d>
<d>0.55909888</d>
<d>0.45600171</d>
<d>0.87697775</d>
<d>0.7820826</d>
<d>0.51209605</d>
<d>0.6897616</d>
<d>0.74630273</d>
<d>0.78649719</d>
<d>0.7579151</d>
<d>0.86734108</d>
<d>0.56267318</d>
<d>0.40646981</d>
<d>0.59571494</d>
<d>0.64763654</d>
<d>0.77006853</d>
<d>0.61116394</d>
<d>0.73645292</d>
<d>0.94994753</d>
<d>0.73125543</d>
<d>0.63252775</d>
<d>0.77571691</d>
<d>0.67853454</d>
<d>0.5475398</d>
<d>0.67388221</d>
<d>0.58212687</d>
<d>0.49877441</d>
<d>0.32654408</d>
<d>0.5328655</d>
</Subcolumn>
</YColumn>
</Table>
<Table ID="Table6" XFormat="none" TableType="OneWay" EVFormat="AsteriskAfterNumber">
<Title>Copy of Par-1 Early</Title>
<RowTitlesColumn Width="84">
<Subcolumn></Subcolumn>
</RowTitlesColumn>
<YColumn Width="81" Decimals="8" Subcolumns="1">
<Title>Basal</Title>
<Subcolumn>
<d>0.5287656</d>
<d>0.21791488</d>
<d>0.33511351</d>
<d>0.51411578</d>
<d>0.54509389</d>
<d>0.49168403</d>
<d>0.36441317</d>
<d>0.34884782</d>
<d>0.4285056</d>
<d>0.34610126</d>
<d>0.5256472</d>
<d>0.28301941</d>
<d>0.4884051</d>
<d>0.49813395</d>
<d>0.41814578</d>
<d>0.55157694</d>
<d>0.41117</d>
<d>0.43195497</d>
<d>0.54093916</d>
<d>0.58263612</d>
<d>0.41343248</d>
<d>0.45906303</d>
<d>0.61265934</d>
<d>0.47659994</d>
<d>0.53592142</d>
<d>0.5236366</d>
<d>0.56550659</d>
<d>0.38231416</d>
<d>0.34596128</d>
<d>0.28729248</d>
<d>0.40606684</d>
<d>0.40396864</d>
<d>0.43170529</d>
<d>0.43778746</d>
<d>0.47086819</d>
<d>0.42985019</d>
<d>0.48476387</d>
<d>0.46973619</d>
<d>0.66476154</d>
<d>0.53285245</d>
<d>0.18358977</d>
<d>0.28848783</d>
<d>0.33892266</d>
<d>0.43425148</d>
<d>0.2318868</d>
<d>0.25463677</d>
<d>0.52009831</d>
<d>0.68968326</d>
<d>0.3516671</d>
<d>0.34970381</d>
<d>0.3041457</d>
<d>0.17322067</d>
<d>0.31316231</d>
<d>0.37238591</d>
<d>0.33584441</d>
<d>0.2861852</d>
<d>0.37510059</d>
<d>0.37692815</d>
<d>0.52074305</d>
<d>0.57385516</d>
<d>0.64589038</d>
<d>0.46363808</d>
<d>0.54022725</d>
<d>0.68644554</d>
<d>0.57476513</d>
<d>0.47653752</d>
<d>0.75093866</d>
<d>0.75215196</d>
<d>0.33185224</d>
<d>0.58033152</d>
<d>0.69635274</d>
<d>0.71503992</d>
<d>0.48530111</d>
<d>0.49912282</d>
<d>0.78518142</d>
<d>0.56714105</d>
<d>0.59089046</d>
<d>0.58762768</d>
<d>0.56665328</d>
<d>0.547134</d>
<d>0.38446656</d>
<d>0.34803496</d>
</Subcolumn>
</YColumn>
<YColumn Width="81" Decimals="8" Subcolumns="1">
<Title>Apical</Title>
<Subcolumn>
<d>0.32550055</d>
<d>0.25331951</d>
<d>0.28383987</d>
<d>0.30444057</d>
<d>0.34762713</d>
<d>0.43079591</d>
<d>0.5081649</d>
<d>0.379063</d>
<d>0.39310248</d>
<d>0.34747454</d>
<d>0.26763327</d>
<d>0.4185203</d>
<d>0.27577861</d>
<d>0.52571291</d>
<d>0.3601647</d>
<d>0.38658066</d>
<d>0.50578431</d>
<d>0.38127382</d>
<d>0.28718297</d>
<d>0.29111656</d>
<d>0.40742039</d>
<d>0.39369442</d>
<d>0.32820097</d>
<d>0.41335582</d>
<d>0.52487406</d>
<d>0.53711945</d>
<d>0.48050287</d>
<d>0.40255158</d>
<d>0.42627798</d>
<d>0.60068991</d>
<d>0.69002584</d>
<d>0.52728547</d>
<d>0.57640501</d>
<d>0.62626265</d>
<d>0.57188664</d>
<d>0.37233344</d>
<d>0.59021456</d>
<d>0.30086385</d>
<d>0.30830982</d>
<d>0.17236264</d>
<d>0.24432099</d>
<d>0.2332199</d>
<d>0.36593855</d>
<d>0.37617676</d>
<d>0.29458131</d>
<d>0.49658726</d>
<d>0.71724208</d>
<d>0.40656176</d>
<d>0.3005536</d>
<d>0.4674675</d>
<d>0.46360878</d>
<d>0.61293059</d>
<d>0.38879517</d>
<d>0.21587989</d>
<d>0.22098446</d>
<d>0.17332732</d>
<d>0.39186372</d>
<d>0.09845069</d>
<d>0.3878111</d>
<d>0.6897616</d>
<d>0.74630273</d>
<d>0.78649719</d>
<d>0.7579151</d>
<d>0.86734108</d>
<d>0.56267318</d>
<d>0.40646981</d>
<d>0.59571494</d>
<d>0.64763654</d>
<d>0.77006853</d>
<d>0.61116394</d>
<d>0.73645292</d>
<d>0.94994753</d>
<d>0.73125543</d>
<d>0.63252775</d>
<d>0.77571691</d>
<d>0.67853454</d>
<d>0.5475398</d>
<d>0.67388221</d>
<d>0.58212687</d>
<d>0.49877441</d>
<d>0.32654408</d>
<d>0.5328655</d>
</Subcolumn>
</YColumn>
</Table>
<Table ID="Table10" XFormat="numbers" YFormat="replicates" Replicates="1" TableType="XY" EVFormat="AsteriskAfterNumber">
<Title>Par-6 Late</Title>
<RowTitlesColumn Width="84">
<Subcolumn></Subcolumn>
</RowTitlesColumn>
<XColumn Width="77" Subcolumns="1" Decimals="8">
<Title></Title>
<Subcolumn>
<d>0</d>
<d>0.02940801</d>
<d>0.05882453</d>
<d>0.08823254</d>
<d>0.11764906</d>
<d>0.14705707</d>
<d>0.17647359</d>
<d>0.2058816</d>
<d>0.23529812</d>
<d>0.26470613</d>
<d>0.29411415</d>
<d>0.32353066</d>
<d>0.35293868</d>
<d>0.38235519</d>
<d>0.41176321</d>
<d>0.44117972</d>
<d>0.47058774</d>
<d>0.49999575</d>
<d>0.52941226</d>
<d>0.55882028</d>
<d>0.58823679</d>
<d>0.61764481</d>
<d>0.64706132</d>
<d>0.67646934</d>
<d>0.70588585</d>
<d>0.73529387</d>
<d>0.76470188</d>
<d>0.7941184</d>
<d>0.82352641</d>
<d>0.85294293</d>
<d>0.88235094</d>
<d>0.91176746</d>
<d>0.94117547</d>
<d>0.97059199</d>
<d>1</d>
<d>0</d>
<d>0.0196054</d>
<d>0.03921646</d>
<d>0.05882186</d>
<d>0.07843293</d>
<d>0.09803833</d>
<d>0.11764939</d>
<d>0.13725479</d>
<d>0.15686586</d>
<d>0.17647126</d>
<d>0.19607665</d>
<d>0.21568772</d>
<d>0.23529312</d>
<d>0.25490418</d>
<d>0.27450958</d>
<d>0.29412065</d>
<d>0.31372605</d>
<d>0.33333144</d>
<d>0.35294251</d>
<d>0.37254791</d>
<d>0.39215897</d>
<d>0.41176437</d>
<d>0.43137544</d>
<d>0.45098084</d>
<d>0.4705919</d>
<d>0.4901973</d>
<d>0.5098027</d>
<d>0.52941377</d>
<d>0.54901916</d>
<d>0.56863023</d>
<d>0.58823563</d>
<d>0.60784669</d>
<d>0.62745209</d>
<d>0.64706316</d>
<d>0.66666856</d>
<d>0.68627395</d>
<d>0.70588502</d>
<d>0.72549042</d>
<d>0.74510148</d>
<d>0.76470688</d>
<d>0.78431795</d>
<d>0.80392335</d>
<d>0.82353441</d>
<d>0.84313981</d>
<d>0.86274521</d>
<d>0.88235628</d>
<d>0.90196167</d>
<d>0.92157274</d>
<d>0.94117814</d>
<d>0.9607892</d>
<d>0.9803946</d>
<d>1</d>
<d>0</d>
<d>0.0370366</d>
<d>0.07407427</d>
<d>0.11111087</d>
<d>0.14814854</d>
<d>0.18518515</d>
<d>0.22222175</d>
<d>0.25925942</d>
<d>0.29629602</d>
<d>0.33333369</d>
<d>0.37037029</d>
<d>0.40740796</d>
<d>0.44444456</d>
<d>0.48148116</d>
<d>0.51851884</d>
<d>0.55555544</d>
<d>0.59259311</d>
<d>0.62962971</d>
<d>0.66666631</d>
<d>0.70370398</d>
<d>0.74074058</d>
<d>0.77777825</d>
<d>0.81481485</d>
<d>0.85185146</d>
<d>0.88888913</d>
<d>0.92592573</d>
<d>0.9629634</d>
<d>1</d>
<d>0</d>
<d>0.01538616</d>
<d>0.03076704</d>
<d>0.0461532</d>
<d>0.06153935</d>
<d>0.07692551</d>
<d>0.09230639</d>
<d>0.10769255</d>
<d>0.12307871</d>
<d>0.13845959</d>
<d>0.15384575</d>
<d>0.16923191</d>
<d>0.18461279</d>
<d>0.19999894</d>
<d>0.2153851</d>
<d>0.23077126</d>
<d>0.24615214</d>
<d>0.2615383</d>
<d>0.27692446</d>
<d>0.29230534</d>
<d>0.3076915</d>
<d>0.32307765</d>
<d>0.33845853</d>
<d>0.35384469</d>
<d>0.36923085</d>
<d>0.38461701</d>
<d>0.39999789</d>
<d>0.41538405</d>
<d>0.43077021</d>
<d>0.44615109</d>
<d>0.46153724</d>
<d>0.4769234</d>
<d>0.49230956</d>
<d>0.50769044</d>
<d>0.5230766</d>
<d>0.53846276</d>
<d>0.55384364</d>
<d>0.56922979</d>
<d>0.58461595</d>
<d>0.59999683</d>
<d>0.61538299</d>
<d>0.63076915</d>
<d>0.64615531</d>
<d>0.66153619</d>
<d>0.67692235</d>
<d>0.6923085</d>
<d>0.70768938</d>
<d>0.72307554</d>
<d>0.7384617</d>
<d>0.75384258</d>
<d>0.76922874</d>
<d>0.7846149</d>
<d>0.80000106</d>
<d>0.81538194</d>
<d>0.83076809</d>
<d>0.84615425</d>
<d>0.86153513</d>
<d>0.87692129</d>
<d>0.89230745</d>
<d>0.90768833</d>
<d>0.92307449</d>
<d>0.93846065</d>
<d>0.9538468</d>
<d>0.96922768</d>
<d>0.98461384</d>
<d>1</d>
<d>0</d>
<d>0.01666838</d>
<d>0.03333105</d>
<d>0.04999943</d>
<d>0.06666781</d>
<d>0.08333619</d>
<d>0.09999886</d>
<d>0.11666724</d>
<d>0.13333562</d>
<d>0.14999828</d>
<d>0.16666667</d>
<d>0.18333505</d>
<d>0.19999771</d>
<d>0.21666609</d>
<d>0.23333448</d>
<d>0.25000286</d>
<d>0.26666552</d>
<d>0.28333391</d>
<d>0.30000229</d>
<d>0.31666495</d>
<d>0.33333333</d>
<d>0.35000172</d>
<d>0.36666438</d>
<d>0.38333276</d>
<d>0.40000114</d>
<d>0.41666953</d>
<d>0.43333219</d>
<d>0.45000057</d>
<d>0.46666895</d>
<d>0.48333162</d>
<d>0.5</d>
<d>0.51666838</d>
<d>0.53333676</d>
<d>0.54999943</d>
<d>0.56666781</d>
<d>0.58333619</d>
<d>0.59999886</d>
<d>0.61666724</d>
<d>0.63333562</d>
<d>0.64999828</d>
<d>0.66666667</d>
<d>0.68333505</d>
<d>0.70000343</d>
<d>0.71666609</d>
<d>0.73333448</d>
<d>0.75000286</d>
<d>0.76666552</d>
<d>0.78333391</d>
<d>0.80000229</d>
<d>0.81666495</d>
<d>0.83333333</d>
<d>0.85000172</d>
<d>0.8666701</d>
<d>0.88333276</d>
<d>0.90000114</d>
<d>0.91666953</d>
<d>0.93333219</d>
<d>0.95000057</d>
<d>0.96666895</d>
<d>0.98333162</d>
<d>1</d>
</Subcolumn>
</XColumn>
<XAdvancedColumn Version="1" Width="77" Decimals="8" Subcolumns="1">
<Title></Title>
<Subcolumn>
<d>0</d>
<d>0.02940801</d>
<d>0.05882453</d>
<d>0.08823254</d>
<d>0.11764906</d>
<d>0.14705707</d>
<d>0.17647359</d>
<d>0.2058816</d>
<d>0.23529812</d>
<d>0.26470613</d>
<d>0.29411415</d>
<d>0.32353066</d>
<d>0.35293868</d>
<d>0.38235519</d>
<d>0.41176321</d>
<d>0.44117972</d>
<d>0.47058774</d>
<d>0.49999575</d>
<d>0.52941226</d>
<d>0.55882028</d>
<d>0.58823679</d>
<d>0.61764481</d>
<d>0.64706132</d>
<d>0.67646934</d>
<d>0.70588585</d>
<d>0.73529387</d>
<d>0.76470188</d>
<d>0.7941184</d>
<d>0.82352641</d>
<d>0.85294293</d>
<d>0.88235094</d>
<d>0.91176746</d>
<d>0.94117547</d>
<d>0.97059199</d>
<d>1</d>
<d>0</d>
<d>0.0196054</d>
<d>0.03921646</d>
<d>0.05882186</d>
<d>0.07843293</d>
<d>0.09803833</d>
<d>0.11764939</d>
<d>0.13725479</d>
<d>0.15686586</d>
<d>0.17647126</d>
<d>0.19607665</d>
<d>0.21568772</d>
<d>0.23529312</d>
<d>0.25490418</d>
<d>0.27450958</d>
<d>0.29412065</d>
<d>0.31372605</d>
<d>0.33333144</d>
<d>0.35294251</d>
<d>0.37254791</d>
<d>0.39215897</d>
<d>0.41176437</d>
<d>0.43137544</d>
<d>0.45098084</d>
<d>0.4705919</d>
<d>0.4901973</d>
<d>0.5098027</d>
<d>0.52941377</d>
<d>0.54901916</d>
<d>0.56863023</d>
<d>0.58823563</d>
<d>0.60784669</d>
<d>0.62745209</d>
<d>0.64706316</d>
<d>0.66666856</d>
<d>0.68627395</d>
<d>0.70588502</d>
<d>0.72549042</d>
<d>0.74510148</d>
<d>0.76470688</d>
<d>0.78431795</d>
<d>0.80392335</d>
<d>0.82353441</d>
<d>0.84313981</d>
<d>0.86274521</d>
<d>0.88235628</d>
<d>0.90196167</d>
<d>0.92157274</d>
<d>0.94117814</d>
<d>0.9607892</d>
<d>0.9803946</d>
<d>1</d>
<d>0</d>
<d>0.0370366</d>
<d>0.07407427</d>
<d>0.11111087</d>
<d>0.14814854</d>
<d>0.18518515</d>
<d>0.22222175</d>
<d>0.25925942</d>
<d>0.29629602</d>
<d>0.33333369</d>
<d>0.37037029</d>
<d>0.40740796</d>
<d>0.44444456</d>
<d>0.48148116</d>
<d>0.51851884</d>
<d>0.55555544</d>
<d>0.59259311</d>
<d>0.62962971</d>
<d>0.66666631</d>
<d>0.70370398</d>
<d>0.74074058</d>
<d>0.77777825</d>
<d>0.81481485</d>
<d>0.85185146</d>
<d>0.88888913</d>
<d>0.92592573</d>
<d>0.9629634</d>
<d>1</d>
<d>0</d>
<d>0.01538616</d>
<d>0.03076704</d>
<d>0.0461532</d>
<d>0.06153935</d>
<d>0.07692551</d>
<d>0.09230639</d>
<d>0.10769255</d>
<d>0.12307871</d>
<d>0.13845959</d>
<d>0.15384575</d>
<d>0.16923191</d>
<d>0.18461279</d>
<d>0.19999894</d>
<d>0.2153851</d>
<d>0.23077126</d>
<d>0.24615214</d>
<d>0.2615383</d>
<d>0.27692446</d>
<d>0.29230534</d>
<d>0.3076915</d>
<d>0.32307765</d>
<d>0.33845853</d>
<d>0.35384469</d>
<d>0.36923085</d>
<d>0.38461701</d>
<d>0.39999789</d>
<d>0.41538405</d>
<d>0.43077021</d>
<d>0.44615109</d>
<d>0.46153724</d>
<d>0.4769234</d>
<d>0.49230956</d>
<d>0.50769044</d>
<d>0.5230766</d>
<d>0.53846276</d>
<d>0.55384364</d>
<d>0.56922979</d>
<d>0.58461595</d>
<d>0.59999683</d>
<d>0.61538299</d>
<d>0.63076915</d>
<d>0.64615531</d>
<d>0.66153619</d>
<d>0.67692235</d>
<d>0.6923085</d>
<d>0.70768938</d>
<d>0.72307554</d>
<d>0.7384617</d>
<d>0.75384258</d>
<d>0.76922874</d>
<d>0.7846149</d>
<d>0.80000106</d>
<d>0.81538194</d>
<d>0.83076809</d>
<d>0.84615425</d>
<d>0.86153513</d>
<d>0.87692129</d>
<d>0.89230745</d>
<d>0.90768833</d>
<d>0.92307449</d>
<d>0.93846065</d>
<d>0.9538468</d>
<d>0.96922768</d>
<d>0.98461384</d>
<d>1</d>
<d>0</d>
<d>0.01666838</d>
<d>0.03333105</d>
<d>0.04999943</d>
<d>0.06666781</d>
<d>0.08333619</d>
<d>0.09999886</d>
<d>0.11666724</d>
<d>0.13333562</d>
<d>0.14999828</d>
<d>0.16666667</d>
<d>0.18333505</d>
<d>0.19999771</d>
<d>0.21666609</d>
<d>0.23333448</d>
<d>0.25000286</d>
<d>0.26666552</d>
<d>0.28333391</d>
<d>0.30000229</d>
<d>0.31666495</d>
<d>0.33333333</d>
<d>0.35000172</d>
<d>0.36666438</d>
<d>0.38333276</d>
<d>0.40000114</d>
<d>0.41666953</d>
<d>0.43333219</d>
<d>0.45000057</d>
<d>0.46666895</d>
<d>0.48333162</d>
<d>0.5</d>
<d>0.51666838</d>
<d>0.53333676</d>
<d>0.54999943</d>
<d>0.56666781</d>
<d>0.58333619</d>
<d>0.59999886</d>
<d>0.61666724</d>
<d>0.63333562</d>
<d>0.64999828</d>
<d>0.66666667</d>
<d>0.68333505</d>
<d>0.70000343</d>
<d>0.71666609</d>
<d>0.73333448</d>
<d>0.75000286</d>
<d>0.76666552</d>
<d>0.78333391</d>
<d>0.80000229</d>
<d>0.81666495</d>
<d>0.83333333</d>
<d>0.85000172</d>
<d>0.8666701</d>
<d>0.88333276</d>
<d>0.90000114</d>
<d>0.91666953</d>
<d>0.93333219</d>
<d>0.95000057</d>
<d>0.96666895</d>
<d>0.98333162</d>
<d>1</d>
</Subcolumn>
</XAdvancedColumn>
<YColumn Width="81" Decimals="8" Subcolumns="1">
<Title></Title>
<Subcolumn>
<d>0.20090383</d>
<d>0.28154308</d>
<d>0.03545362</d>
<d>0.15745542</d>
<d>0.25373681</d>
<d>0.26590213</d>
<d>0.15363234</d>
<d>0.33611447</d>
<d>0.17448734</d>
<d>0.2752867</d>
<d>0.54362213</d>
<d>0.2175883</d>
<d>0.28084819</d>
<d>0.24991373</d>
<d>0.27459181</d>
<d>0.51373</d>
<d>0.26694447</d>
<d>0.54362213</d>
<d>0.31908255</d>
<d>0.47375723</d>
<d>0.48175202</d>
<d>0.50712618</d>
<d>0.42752926</d>
<d>0.88634043</d>
<d>0.83211767</d>
<d>0.67014309</d>
<d>0.90232883</d>
<d>0.43899969</d>
<d>0.62565235</d>
<d>0.6485932</d>
<d>0.53806064</d>
<d>0.57490522</d>
<d>0.64720224</d>
<d>1</d>
<d>0.75634383</d>
</Subcolumn>
</YColumn>
<YColumn Width="81" Decimals="8" Subcolumns="1">
<Title></Title>
<Subcolumn>
<d></d>
<d></d>
<d></d>
<d></d>
<d></d>
<d></d>
<d></d>
<d></d>
<d></d>
<d></d>
<d></d>
<d></d>
<d></d>
<d></d>
<d></d>
<d></d>
<d></d>
<d></d>
<d></d>
<d></d>
<d></d>
<d></d>
<d></d>
<d></d>
<d></d>
<d></d>
<d></d>
<d></d>
<d></d>
<d></d>
<d></d>
<d></d>
<d></d>
<d></d>
<d></d>
<d>0.25740247</d>
<d>0.29603686</d>
<d>0.36398596</d>
<d>0.18413028</d>
<d>0.32305382</d>
<d>0.31822495</d>
<d>0.22711992</d>
<d>0.31381136</d>
<d>0.19651992</d>
<d>0.28620065</d>
<d>0.23353268</d>
<d>0.24863362</d>
<d>0.17700538</d>
<d>0.21916276</d>
<d>0.44901458</d>
<d>0.57186763</d>
<d>0.45180482</d>
<d>0.54340578</d>
<d>0.3490223</d>
<d>0.44559112</d>
<d>0.16433775</d>
<d>0.42906417</d>
<d>0.33089259</d>
<d>0.31422663</d>
<d>0.32461883</d>
<d>0.32738848</d>
<d>0.37477284</d>
<d>0.53707196</d>
<d>0.58293078</d>
<d>0.56646389</d>
<d>0.61301598</d>
<d>0.77256433</d>
<d>0.70908888</d>
<d>0.66871273</d>
<d>0.76076672</d>
<d>0.71732233</d>
<d>0.59389613</d>
<d>0.57317352</d>
<d>0.6434564</d>
<d>0.84476744</d>
<d>0.66693151</d>
<d>0.79639465</d>
<d>0.59544054</d>
<d>0.32998138</d>
<d>0.58633536</d>
<d>0.529887</d>
<d>0.6785884</d>
<d>0.70811933</d>
<d>0.44497679</d>
<d>0.63793426</d>
<d>1</d>
<d>0.75504723</d>
</Subcolumn>
</YColumn>
<YColumn Width="81" Decimals="8" Subcolumns="1">
<Title></Title>
<Subcolumn>
<d></d>
<d></d>
<d></d>
<d></d>
<d></d>
<d></d>
<d></d>
<d></d>
<d></d>
<d></d>
<d></d>
<d></d>
<d></d>
<d></d>
<d></d>
<d></d>
<d></d>
<d></d>
<d></d>
<d></d>
<d></d>
<d></d>
<d></d>
<d></d>
<d></d>
<d></d>
<d></d>
<d></d>
<d></d>
<d></d>
<d></d>
<d></d>
<d></d>
<d></d>
<d></d>
<d></d>
<d></d>
<d></d>
<d></d>
<d></d>
<d></d>
<d></d>
<d></d>
<d></d>
<d></d>
<d></d>
<d></d>
<d></d>
<d></d>
<d></d>
<d></d>
<d></d>
<d></d>
<d></d>
<d></d>
<d></d>
<d></d>
<d></d>
<d></d>
<d></d>
<d></d>
<d></d>
<d></d>
<d></d>
<d></d>
<d></d>
<d></d>
<d></d>
<d></d>
<d></d>
<d></d>
<d></d>
<d></d>
<d></d>
<d></d>
<d></d>
<d></d>
<d></d>
<d></d>
<d></d>
<d></d>
<d></d>
<d></d>
<d></d>
<d></d>
<d></d>
<d></d>
<d>0.71892668</d>
<d>0.47057524</d>
<d>0.56034135</d>
<d>0.46800352</d>
<d>0.4380086</d>
<d>0.3780083</d>
<d>0.42300069</d>
<d>0.53189498</d>
<d>0.64226096</d>
<d>0.54820144</d>
<d>0.4508642</d>
<d>0.46174513</d>
<d>0.26929908</d>
<d>0.41863041</d>
<d>0.38670781</d>
<d>0.48750485</d>
<d>0.41461163</d>
<d>0.4968208</d>
<d>0.49614541</d>
<d>0.68382265</d>
<d>0.59693274</d>
<d>0.41431908</d>
<d>0.52020583</d>
<d>0.45982716</d>
<d>0.41452431</d>
<d>0.53186737</d>
<d>1</d>
<d>0.8375041</d>
</Subcolumn>
</YColumn>
<YColumn Width="81" Decimals="8" Subcolumns="1">
<Title></Title>
<Subcolumn>
<d></d>
<d></d>
<d></d>
<d></d>
<d></d>
<d></d>
<d></d>
<d></d>
<d></d>
<d></d>
<d></d>
<d></d>
<d></d>
<d></d>
<d></d>
<d></d>
<d></d>
<d></d>
<d></d>
<d></d>
<d></d>
<d></d>
<d></d>
<d></d>
<d></d>
<d></d>
<d></d>
<d></d>
<d></d>
<d></d>
<d></d>
<d></d>
<d></d>
<d></d>
<d></d>
<d></d>
<d></d>
<d></d>
<d></d>
<d></d>
<d></d>
<d></d>
<d></d>
<d></d>
<d></d>
<d></d>
<d></d>
<d></d>
<d></d>
<d></d>
<d></d>
<d></d>
<d></d>
<d></d>
<d></d>
<d></d>
<d></d>
<d></d>
<d></d>
<d></d>
<d></d>
<d></d>
<d></d>
<d></d>
<d></d>
<d></d>
<d></d>
<d></d>
<d></d>
<d></d>
<d></d>
<d></d>
<d></d>
<d></d>
<d></d>
<d></d>
<d></d>
<d></d>
<d></d>
<d></d>
<d></d>
<d></d>
<d></d>
<d></d>
<d></d>
<d></d>
<d></d>
<d></d>
<d></d>
<d></d>
<d></d>
<d></d>
<d></d>
<d></d>
<d></d>
<d></d>
<d></d>
<d></d>
<d></d>
<d></d>
<d></d>
<d></d>
<d></d>
<d></d>
<d></d>
<d></d>
<d></d>
<d></d>
<d></d>
<d></d>
<d></d>
<d></d>
<d></d>
<d></d>
<d></d>
<d>0.18947368</d>
<d>0.16582947</d>
<d>0.41263158</d>
<d>0.23319789</d>
<d>0.10979789</d>
<d>0.24777368</d>
<d>0.16469684</d>
<d>0.29959474</d>
<d>0.12777368</d>
<d>0.17732842</d>
<d>0.27287474</d>
<d>0.15789474</d>
<d>0.26639684</d>
<d>0.14315789</d>
<d>0.19935263</d>
<d>0.11417053</d>
<d>0.32097158</d>
<d>0.36599158</d>
<d>0.14736842</d>
<d>0.08097158</d>
<d>0.34008105</d>
<d>0.17587053</d>
<d>0.16939263</d>
<d>0.25166</d>
<d>0.14283368</d>
<d>0.15870421</d>
<d>0.22736842</d>
<d>0.45522316</d>
<d>0.42947368</d>
<d>0.28550632</d>
<d>0.32550632</d>
<d>0.14769263</d>
<d>0.22137684</d>
<d>0.23352211</d>
<d>0.26979789</d>
<d>0.28178105</d>
<d>0.33943368</d>
<d>0.30364421</d>
<d>0.32323895</d>
<d>0.43157895</d>
<d>0.25587053</d>
<d>0.35076947</d>
<d>0.52016211</d>
<d>0.38332</d>
<d>0.54623474</d>
<d>0.49959474</d>
<d>0.78251053</d>
<d>0.73311789</d>
<d>0.48647789</d>
<d>0.74510105</d>
<d>0.82753053</d>
<d>0.77311789</d>
<d>0.91157895</d>
<d>0.82979789</d>
<d>0.92453474</d>
<d>0.99757053</d>
<d>0.72048632</d>
<d>0.93246947</d>
<d>0.77910947</d>
<d>0.74655895</d>
<d>0.77004</d>
<d>0.76631579</d>
<d>0.98914947</d>
<d>0.86672105</d>
<d>0.91498</d>
<d>1</d>
</Subcolumn>
</YColumn>
<YColumn Width="81" Decimals="8" Subcolumns="1">
<Title></Title>
<Subcolumn>
<d></d>
<d></d>
<d></d>
<d></d>
<d></d>
<d></d>
<d></d>
<d></d>
<d></d>
<d></d>
<d></d>
<d></d>
<d></d>
<d></d>
<d></d>
<d></d>
<d></d>
<d></d>
<d></d>
<d></d>
<d></d>
<d></d>
<d></d>
<d></d>
<d></d>
<d></d>
<d></d>
<d></d>
<d></d>
<d></d>
<d></d>
<d></d>
<d></d>
<d></d>
<d></d>
<d></d>
<d></d>
<d></d>
<d></d>
<d></d>
<d></d>
<d></d>
<d></d>
<d></d>
<d></d>
<d></d>
<d></d>
<d></d>
<d></d>
<d></d>
<d></d>
<d></d>
<d></d>
<d></d>
<d></d>
<d></d>
<d></d>
<d></d>
<d></d>
<d></d>
<d></d>
<d></d>
<d></d>
<d></d>
<d></d>
<d></d>
<d></d>
<d></d>
<d></d>
<d></d>
<d></d>
<d></d>
<d></d>
<d></d>
<d></d>
<d></d>
<d></d>
<d></d>
<d></d>
<d></d>
<d></d>
<d></d>
<d></d>
<d></d>
<d></d>
<d></d>
<d></d>
<d></d>
<d></d>
<d></d>
<d></d>
<d></d>
<d></d>
<d></d>
<d></d>
<d></d>
<d></d>
<d></d>
<d></d>
<d></d>
<d></d>
<d></d>
<d></d>
<d></d>
<d></d>
<d></d>
<d></d>
<d></d>
<d></d>
<d></d>
<d></d>
<d></d>
<d></d>
<d></d>
<d></d>
<d></d>
<d></d>
<d></d>
<d></d>
<d></d>
<d></d>
<d></d>
<d></d>
<d></d>
<d></d>
<d></d>
<d></d>
<d></d>
<d></d>
<d></d>
<d></d>
<d></d>
<d></d>
<d></d>
<d></d>
<d></d>
<d></d>
<d></d>
<d></d>
<d></d>
<d></d>
<d></d>
<d></d>
<d></d>
<d></d>
<d></d>
<d></d>
<d></d>
<d></d>
<d></d>
<d></d>
<d></d>
<d></d>
<d></d>
<d></d>
<d></d>
<d></d>
<d></d>
<d></d>
<d></d>
<d></d>
<d></d>
<d></d>
<d></d>
<d></d>
<d></d>
<d></d>
<d></d>
<d></d>
<d></d>
<d></d>
<d></d>
<d></d>
<d></d>
<d></d>
<d></d>
<d></d>
<d></d>
<d></d>
<d></d>
<d></d>
<d>0.13559322</d>
<d>0.16478305</d>
<d>0.25047119</d>
<d>0.35310734</d>
<d>0.25235367</d>
<d>0.46421808</d>
<d>0.27683616</d>
<d>0.27307006</d>
<d>0.35028249</d>
<d>0.32485876</d>
<d>0.3182678</d>
<d>0.26553672</d>
<d>0.53107345</d>
<d>0.32015028</d>
<d>0.50094124</d>
<d>0.31073446</d>
<d>0.35404859</d>
<d>0.28060226</d>
<d>0.4519774</d>
<d>0.46704294</d>
<d>0.30885085</d>
<d>0.49152542</d>
<d>0.33144972</d>
<d>0.46045198</d>
<d>0.30508475</d>
<d>0.33992429</d>
<d>0.48399209</d>
<d>0.48305085</d>
<d>0.49717514</d>
<d>0.4077209</d>
<d>0.47457627</d>
<d>0.33144972</d>
<d>0.30885085</d>
<d>0.29661017</d>
<d>0.41619548</d>
<d>0.24670395</d>
<d>0.51977401</d>
<d>0.45386102</d>
<d>0.41242938</d>
<d>0.62711864</d>
<d>0.46704294</d>
<d>0.78531073</d>
<d>0.49152542</d>
<d>0.48870056</d>
<d>0.43314463</d>
<d>0.68361582</d>
<d>0.70809831</d>
<d>0.59133672</d>
<d>0.42937853</d>
<d>0.59133672</d>
<d>1</d>
<d>0.68361582</d>
<d>0.87758983</d>
<d>0.81073446</d>
<d>0.85310734</d>
<d>0.72504746</d>
<d>0.47834237</d>
<d>0.78531073</d>
<d>0.51412429</d>
<d>0.82485876</d>
<d>0.79096045</d>
</Subcolumn>
</YColumn>
</Table>
<Table ID="Table11" XFormat="none" TableType="OneWay" EVFormat="AsteriskAfterNumber">
<Title>Copy of Par-6 Late</Title>
<RowTitlesColumn Width="32">
<Subcolumn></Subcolumn>
</RowTitlesColumn>
<YColumn Width="81" Decimals="8" Subcolumns="1">
<Title>Basolateral</Title>
<Subcolumn>
<d>0.20090383</d>
<d>0.28154308</d>
<d>0.03545362</d>
<d>0.15745542</d>
<d>0.25373681</d>
<d>0.26590213</d>
<d>0.15363234</d>
<d>0.33611447</d>
<d>0.17448734</d>
<d>0.2752867</d>
<d>0.54362213</d>
<d>0.2175883</d>
<d>0.28084819</d>
<d>0.24991373</d>
<d>0.27459181</d>
<d>0.51373</d>
<d>0.26694447</d>
<d>0.54362213</d>
<d>0.31908255</d>
<d>0.47375723</d>
<d>0.48175202</d>
<d>0.50712618</d>
<d>0.42752926</d>
<d>0.88634043</d>
<d>0.83211767</d>
<d>0.67014309</d>
<d>0.90232883</d>
<d>0.43899969</d>
<d>0.62565235</d>
<d>0.6485932</d>
<d>0.53806064</d>
<d>0.25740247</d>
<d>0.29603686</d>
<d>0.36398596</d>
<d>0.18413028</d>
<d>0.32305382</d>
<d>0.31822495</d>
<d>0.22711992</d>
<d>0.31381136</d>
<d>0.19651992</d>
<d>0.28620065</d>
<d>0.23353268</d>
<d>0.24863362</d>
<d>0.17700538</d>
<d>0.21916276</d>
<d>0.44901458</d>
<d>0.57186763</d>
<d>0.45180482</d>
<d>0.54340578</d>
<d>0.3490223</d>
<d>0.44559112</d>
<d>0.16433775</d>
<d>0.42906417</d>
<d>0.33089259</d>
<d>0.31422663</d>
<d>0.32461883</d>
<d>0.32738848</d>
<d>0.37477284</d>
<d>0.53707196</d>
<d>0.58293078</d>
<d>0.56646389</d>
<d>0.61301598</d>
<d>0.77256433</d>
<d>0.70908888</d>
<d>0.66871273</d>
<d>0.76076672</d>
<d>0.71732233</d>
<d>0.59389613</d>
<d>0.57317352</d>
<d>0.6434564</d>
<d>0.84476744</d>
<d>0.66693151</d>
<d>0.79639465</d>
<d>0.59544054</d>
<d>0.32998138</d>
<d>0.71892668</d>
<d>0.47057524</d>
<d>0.56034135</d>
<d>0.46800352</d>
<d>0.4380086</d>
<d>0.3780083</d>
<d>0.42300069</d>
<d>0.53189498</d>
<d>0.64226096</d>
<d>0.54820144</d>
<d>0.4508642</d>
<d>0.46174513</d>
<d>0.26929908</d>
<d>0.41863041</d>
<d>0.38670781</d>
<d>0.48750485</d>
<d>0.41461163</d>
<d>0.4968208</d>
<d>0.49614541</d>
<d>0.68382265</d>
<d>0.59693274</d>
<d>0.41431908</d>
<d>0.52020583</d>
<d>0.45982716</d>
<d>0.41452431</d>
<d>0.18947368</d>
<d>0.16582947</d>
<d>0.41263158</d>
<d>0.23319789</d>
<d>0.10979789</d>
<d>0.24777368</d>
<d>0.16469684</d>
<d>0.29959474</d>
<d>0.12777368</d>
<d>0.17732842</d>
<d>0.27287474</d>
<d>0.15789474</d>
<d>0.26639684</d>
<d>0.14315789</d>
<d>0.19935263</d>
<d>0.11417053</d>
<d>0.32097158</d>
<d>0.36599158</d>
<d>0.14736842</d>
<d>0.08097158</d>
<d>0.34008105</d>
<d>0.17587053</d>
<d>0.16939263</d>
<d>0.25166</d>
<d>0.14283368</d>
<d>0.15870421</d>
<d>0.22736842</d>
<d>0.45522316</d>
<d>0.42947368</d>
<d>0.28550632</d>
<d>0.32550632</d>
<d>0.14769263</d>
<d>0.22137684</d>
<d>0.23352211</d>
<d>0.26979789</d>
<d>0.28178105</d>
<d>0.33943368</d>
<d>0.30364421</d>
<d>0.32323895</d>
<d>0.43157895</d>
<d>0.25587053</d>
<d>0.35076947</d>
<d>0.52016211</d>
<d>0.38332</d>
<d>0.54623474</d>
<d>0.49959474</d>
<d>0.78251053</d>
<d>0.73311789</d>
<d>0.48647789</d>
<d>0.74510105</d>
<d>0.82753053</d>
<d>0.77311789</d>
<d>0.91157895</d>
<d>0.82979789</d>
<d>0.92453474</d>
<d>0.99757053</d>
<d>0.72048632</d>
<d>0.93246947</d>
<d>0.77910947</d>
<d>0.13559322</d>
<d>0.16478305</d>
<d>0.25047119</d>
<d>0.35310734</d>
<d>0.25235367</d>
<d>0.46421808</d>
<d>0.27683616</d>
<d>0.27307006</d>
<d>0.35028249</d>
<d>0.32485876</d>
<d>0.3182678</d>
<d>0.26553672</d>
<d>0.53107345</d>
<d>0.32015028</d>
<d>0.50094124</d>
<d>0.31073446</d>
<d>0.35404859</d>
<d>0.28060226</d>
<d>0.4519774</d>
<d>0.46704294</d>
<d>0.30885085</d>
<d>0.49152542</d>
<d>0.33144972</d>
<d>0.46045198</d>
<d>0.30508475</d>
<d>0.33992429</d>
<d>0.48399209</d>
<d>0.48305085</d>
<d>0.49717514</d>
<d>0.4077209</d>
<d>0.47457627</d>
<d>0.33144972</d>
<d>0.30885085</d>
<d>0.29661017</d>
<d>0.41619548</d>
<d>0.24670395</d>
<d>0.51977401</d>
<d>0.45386102</d>
<d>0.41242938</d>
<d>0.62711864</d>
<d>0.46704294</d>
<d>0.78531073</d>
<d>0.49152542</d>
<d>0.48870056</d>
<d>0.43314463</d>
<d>0.68361582</d>
<d>0.70809831</d>
<d>0.59133672</d>
<d>0.42937853</d>
<d>0.59133672</d>
</Subcolumn>
</YColumn>
<YColumn Width="81" Decimals="8" Subcolumns="1">
<Title>Apical</Title>
<Subcolumn>
<d>0.57490522</d>
<d>0.64720224</d>
<d>1</d>
<d>0.75634383</d>
<d>0.58633536</d>
<d>0.529887</d>
<d>0.6785884</d>
<d>0.70811933</d>
<d>0.44497679</d>
<d>0.63793426</d>
<d>1</d>
<d>0.75504723</d>
<d>0.53186737</d>
<d>1</d>
<d>0.8375041</d>
<d>0.74655895</d>
<d>0.77004</d>
<d>0.76631579</d>
<d>0.98914947</d>
<d>0.86672105</d>
<d>0.91498</d>
<d>1</d>
<d>1</d>
<d>0.68361582</d>
<d>0.87758983</d>
<d>0.81073446</d>
<d>0.85310734</d>
<d>0.72504746</d>
<d>0.47834237</d>
<d>0.78531073</d>
<d>0.51412429</d>
<d>0.82485876</d>
<d>0.79096045</d>
</Subcolumn>
</YColumn>
</Table>
<Table ID="Table15" XFormat="numbers" YFormat="replicates" Replicates="1" TableType="XY" EVFormat="AsteriskAfterNumber">
<Title>Par-6 Early</Title>
<RowTitlesColumn Width="32">
<Subcolumn></Subcolumn>
</RowTitlesColumn>
<XColumn Width="77" Subcolumns="1" Decimals="8">
<Title></Title>
<Subcolumn>
<d>0</d>
<d>0.00483165</d>
<d>0.00966154</d>
<d>0.01449319</d>
<d>0.01932308</d>
<d>0.02415472</d>
<d>0.02898637</d>
<d>0.03381626</d>
<d>0.03864791</d>
<d>0.0434778</d>
<d>0.04830945</d>
<d>0.05313934</d>
<d>0.05797099</d>
<d>0.06280264</d>
<d>0.06763253</d>
<d>0.07246417</d>
<d>0.07729407</d>
<d>0.08212571</d>
<d>0.08695736</d>
<d>0.09178725</d>
<d>0.0966189</d>
<d>0.10144879</d>
<d>0.10628044</d>
<d>0.11111033</d>
<d>0.11594198</d>
<d>0.12077362</d>
<d>0.12560352</d>
<d>0.13043516</d>
<d>0.13526506</d>
<d>0.1400967</d>
<d>0.14492835</d>
<d>0.14975824</d>
<d>0.15458989</d>
<d>0.15941978</d>
<d>0.16425143</d>
<d>0.16908307</d>
<d>0.17391297</d>
<d>0.17874461</d>
<d>0.18357451</d>
<d>0.18840615</d>
<d>0.19323605</d>
<d>0.19806769</d>
<d>0.20289934</d>
<d>0.20772923</d>
<d>0.21256088</d>
<d>0.21739077</d>
<d>0.22222242</d>
<d>0.22705406</d>
<d>0.23188396</d>
<d>0.2367156</d>
<d>0.2415455</d>
<d>0.24637714</d>
<d>0.25120879</d>
<d>0.25603868</d>
<d>0.26087033</d>
<d>0.26570022</d>
<d>0.27053187</d>
<d>0.27536176</d>
<d>0.28019341</d>
<d>0.28502505</d>
<d>0.28985495</d>
<d>0.29468659</d>
<d>0.29951648</d>
<d>0.30434813</d>
<d>0.30917978</d>
<d>0.31400967</d>
<d>0.31884132</d>
<d>0.32367121</d>
<d>0.32850286</d>
<d>0.33333275</d>
<d>0.3381644</d>
<d>0.34299604</d>
<d>0.34782593</d>
<d>0.35265758</d>
<d>0.35748747</d>
<d>0.36231912</d>
<d>0.36715077</d>
<d>0.37198066</d>
<d>0.37681231</d>
<d>0.3816422</d>
<d>0.38647384</d>
<d>0.39130549</d>
<d>0.39613538</d>
<d>0.40096703</d>
<d>0.40579692</d>
<d>0.41062857</d>
<d>0.41545846</d>
<d>0.42029011</d>
<d>0.42512176</d>
<d>0.42995165</d>
<d>0.43478329</d>
<d>0.43961319</d>
<d>0.44444483</d>
<d>0.44927648</d>
<d>0.45410637</d>
<d>0.45893802</d>
<d>0.46376791</d>
<d>0.46859956</d>
<d>0.47342945</d>
<d>0.4782611</d>
<d>0.48309274</d>
<d>0.48792264</d>
<d>0.49275428</d>
<d>0.49758418</d>
<d>0.50241582</d>
<d>0.50724747</d>
<d>0.51207736</d>
<d>0.51690901</d>
<d>0.5217389</d>
<d>0.52657055</d>
<d>0.53140219</d>
<d>0.53623209</d>
<d>0.54106373</d>
<d>0.54589363</d>
<d>0.55072527</d>
<d>0.55555517</d>
<d>0.56038681</d>
<d>0.56521846</d>
<d>0.57004835</d>
<d>0.57488</d>
<d>0.57970989</d>
<d>0.58454154</d>
<d>0.58937318</d>
<d>0.59420308</d>
<d>0.59903472</d>
<d>0.60386462</d>
<d>0.60869626</d>
<d>0.61352791</d>
<d>0.6183578</d>
<d>0.62318945</d>
<d>0.62801934</d>
<d>0.63285099</d>
<d>0.63768088</d>
<d>0.64251253</d>
<d>0.64734417</d>
<d>0.65217407</d>
<d>0.65700571</d>
<d>0.6618356</d>
<d>0.66666725</d>
<d>0.6714989</d>
<d>0.67632879</d>
<d>0.68116044</d>
<d>0.68599033</d>
<d>0.69082198</d>
<d>0.69565187</d>
<d>0.70048352</d>
<d>0.70531516</d>
<d>0.71014505</d>
<d>0.7149767</d>
<d>0.71980659</d>
<d>0.72463824</d>
<d>0.72946989</d>
<d>0.73429978</d>
<d>0.73913143</d>
<d>0.74396132</d>
<d>0.74879296</d>
<d>0.75362461</d>
<d>0.7584545</d>
<d>0.76328615</d>
<d>0.76811604</d>
<d>0.77294769</d>
<d>0.77777758</d>
<d>0.78260923</d>
<d>0.78744087</d>
<d>0.79227077</d>
<d>0.79710241</d>
<d>0.80193231</d>
<d>0.80676395</d>
<d>0.8115956</d>
<d>0.81642549</d>
<d>0.82125714</d>
<d>0.82608703</d>
<d>0.83091868</d>
<d>0.83574857</d>
<d>0.84058022</d>
<d>0.84541186</d>
<d>0.85024176</d>
<d>0.8550734</d>
<d>0.8599033</d>
<d>0.86473494</d>
<d>0.86956659</d>
<d>0.87439648</d>
<d>0.87922813</d>
<d>0.88405802</d>
<d>0.88888967</d>
<d>0.89372131</d>
<d>0.89855121</d>
<d>0.90338285</d>
<d>0.90821275</d>
<d>0.91304439</d>
<d>0.91787429</d>
<d>0.92270593</d>
<d>0.92753758</d>
<d>0.93236747</d>
<d>0.93719912</d>
<d>0.94202901</d>
<d>0.94686066</d>
<d>0.9516923</d>
<d>0.9565222</d>
<d>0.96135384</d>
<d>0.96618374</d>
<d>0.97101538</d>
<d>0.97584703</d>
<d>0.98067692</d>
<d>0.98550857</d>
<d>0.99033846</d>
<d>0.99517011</d>
<d>1</d>
<d>0</d>
<d>0.00671242</d>
<d>0.01342241</d>
<d>0.02013483</d>
<d>0.02684482</d>
<d>0.03355724</d>
<d>0.04026967</d>
<d>0.04697965</d>
<d>0.05369208</d>
<d>0.06040206</d>
<d>0.06711449</d>
<d>0.07382447</d>
<d>0.0805369</d>
<d>0.08724932</d>
<d>0.09395931</d>
<d>0.10067173</d>
<d>0.10738172</d>
<d>0.11409414</d>
<d>0.12080656</d>
<d>0.12751655</d>
<d>0.13422897</d>
<d>0.14093896</d>
<d>0.14765138</d>
<d>0.15436137</d>
<d>0.16107379</d>
<d>0.16778622</d>
<d>0.1744962</d>
<d>0.18120863</d>
<d>0.18791861</d>
<d>0.19463104</d>
<d>0.20134346</d>
<d>0.20805345</d>
<d>0.21476587</d>
<d>0.22147586</d>
<d>0.22818828</d>
<d>0.2349007</d>
<d>0.24161069</d>
<d>0.24832311</d>
<d>0.2550331</d>
<d>0.26174552</d>
<d>0.26845551</d>
<d>0.27516793</d>
<d>0.28188035</d>
<d>0.28859034</d>
<d>0.29530277</d>
<d>0.30201275</d>
<d>0.30872518</d>
<d>0.3154376</d>
<d>0.32214759</d>
<d>0.32886001</d>
<d>0.33557</d>
<d>0.34228242</d>
<d>0.34899484</d>
<d>0.35570483</d>
<d>0.36241725</d>
<d>0.36912724</d>
<d>0.37583966</d>
<d>0.38254965</d>
<d>0.38926207</d>
<d>0.39597449</d>
<d>0.40268448</d>
<d>0.4093969</d>
<d>0.41610689</d>
<d>0.42281931</d>
<d>0.42953174</d>
<d>0.43624173</d>
<d>0.44295415</d>
<d>0.44966414</d>
<d>0.45637656</d>
<d>0.46308655</d>
<d>0.46979897</d>
<d>0.47651139</d>
<d>0.48322138</d>
<d>0.4899338</d>
<d>0.49664379</d>
<d>0.50335621</d>
<d>0.51006863</d>
<d>0.51677862</d>
<d>0.52349104</d>
<d>0.53020103</d>
<d>0.53691345</d>
<d>0.54362588</d>
<d>0.55033586</d>
<d>0.55704829</d>
<d>0.56375827</d>
<d>0.5704707</d>
<d>0.57718069</d>
<d>0.58389311</d>
<d>0.59060553</d>
<d>0.59731552</d>
<d>0.60402794</d>
<d>0.61073793</d>
<d>0.61745035</d>
<d>0.62416277</d>
<d>0.63087276</d>
<d>0.63758518</d>
<d>0.64429517</d>
<d>0.65100759</d>
<d>0.65771758</d>
<d>0.66443</d>
<d>0.67114243</d>
<d>0.67785241</d>
<d>0.68456484</d>
<d>0.69127482</d>
<d>0.69798725</d>
<d>0.70469967</d>
<d>0.71140966</d>
<d>0.71812208</d>
<d>0.72483207</d>
<d>0.73154449</d>
<d>0.73825691</d>
<d>0.7449669</d>
<d>0.75167932</d>
<d>0.75838931</d>
<d>0.76510173</d>
<d>0.77181172</d>
<d>0.77852414</d>
<d>0.78523657</d>
<d>0.79194655</d>
<d>0.79865898</d>
<d>0.80536896</d>
<d>0.81208139</d>
<d>0.81879381</d>
<d>0.8255038</d>
<d>0.83221622</d>
<d>0.83892621</d>
<d>0.84563863</d>
<d>0.85235105</d>
<d>0.85906104</d>
<d>0.86577346</d>
<d>0.87248345</d>
<d>0.87919587</d>
<d>0.88590586</d>
<d>0.89261828</d>
<d>0.89933071</d>
<d>0.90604069</d>
<d>0.91275312</d>
<d>0.9194631</d>
<d>0.92617553</d>
<d>0.93288795</d>
<d>0.93959794</d>
<d>0.94631036</d>
<d>0.95302035</d>
<d>0.95973277</d>
<d>0.96644276</d>
<d>0.97315518</d>
<d>0.9798676</d>
<d>0.98657759</d>
<d>0.99329001</d>
<d>1</d>
<d>0</d>
<d>0.00429249</d>
<d>0.00858342</d>
<d>0.0128759</d>
<d>0.01716683</d>
<d>0.02145932</d>
<d>0.02575181</d>
<d>0.03004274</d>
<d>0.03433523</d>
<d>0.03862616</d>
<d>0.04291864</d>
<d>0.04720957</d>
<d>0.05150206</d>
<d>0.05579455</d>
<d>0.06008548</d>
<d>0.06437796</d>
<d>0.06866889</d>
<d>0.07296138</d>
<d>0.07725387</d>
<d>0.0815448</d>
<d>0.08583728</d>
<d>0.09012821</d>
<d>0.0944207</d>
<d>0.09871163</d>
<d>0.10300412</d>
<d>0.10729661</d>
<d>0.11158754</d>
<d>0.11588002</d>
<d>0.12017095</d>
<d>0.12446344</d>
<d>0.12875593</d>
<d>0.13304686</d>
<d>0.13733934</d>
<d>0.14163027</d>
<d>0.14592276</d>
<d>0.15021525</d>
<d>0.15450618</d>
<d>0.15879866</d>
<d>0.16308959</d>
<d>0.16738208</d>
<d>0.17167301</d>
<d>0.1759655</d>
<d>0.18025799</d>
<d>0.18454892</d>
<d>0.1888414</d>
<d>0.19313233</d>
<d>0.19742482</d>
<d>0.20171731</d>
<d>0.20600824</d>
<d>0.21030072</d>
<d>0.21459165</d>
<d>0.21888414</d>
<d>0.22317663</d>
<d>0.22746756</d>
<d>0.23176004</d>
<d>0.23605097</d>
<d>0.24034346</d>
<d>0.24463439</d>
<d>0.24892688</d>
<d>0.25321937</d>
<d>0.2575103</d>
<d>0.26180278</d>
<d>0.26609371</d>
<d>0.2703862</d>
<d>0.27467869</d>
<d>0.27896962</d>
<d>0.2832621</d>
<d>0.28755303</d>
<d>0.29184552</d>
<d>0.29613645</d>
<d>0.30042894</d>
<d>0.30472142</d>
<d>0.30901235</d>
<d>0.31330484</d>
<d>0.31759577</d>
<d>0.32188826</d>
<d>0.32618075</d>
<d>0.33047168</d>
<d>0.33476416</d>
<d>0.33905509</d>
<d>0.34334758</d>
<d>0.34764007</d>
<d>0.351931</d>
<d>0.35622348</d>
<d>0.36051441</d>
<d>0.3648069</d>
<d>0.36909783</d>
<d>0.37339032</d>
<d>0.3776828</d>
<d>0.38197373</d>
<d>0.38626622</d>
<d>0.39055715</d>
<d>0.39484964</d>
<d>0.39914213</d>
<d>0.40343306</d>
<d>0.40772554</d>
<d>0.41201647</d>
<d>0.41630896</d>
<d>0.42059989</d>
<d>0.42489238</d>
<d>0.42918486</d>
<d>0.43347579</d>
<d>0.43776828</d>
<d>0.44205921</d>
<d>0.4463517</d>
<d>0.45064418</d>
<d>0.45493511</d>
<d>0.4592276</d>
<d>0.46351853</d>
<d>0.46781102</d>
<d>0.47210351</d>
<d>0.47639444</d>
<d>0.48068692</d>
<d>0.48497785</d>
<d>0.48927034</d>
<d>0.49356127</d>
<d>0.49785376</d>
<d>0.50214624</d>
<d>0.50643717</d>
<d>0.51072966</d>
<d>0.51502059</d>
<d>0.51931308</d>
<d>0.52360556</d>
<d>0.52789649</d>
<d>0.53218898</d>
<d>0.53647991</d>
<d>0.5407724</d>
<d>0.54506489</d>
<d>0.54935582</d>
<d>0.5536483</d>
<d>0.55793923</d>
<d>0.56223172</d>
<d>0.56652265</d>
<d>0.57081514</d>
<d>0.57510762</d>
<d>0.57939855</d>
<d>0.58369104</d>
<d>0.58798197</d>
<d>0.59227446</d>
<d>0.59656694</d>
<d>0.60085787</d>
<d>0.60515036</d>
<d>0.60944129</d>
<d>0.61373378</d>
<d>0.61802471</d>
<d>0.6223172</d>
<d>0.62660968</d>
<d>0.63090061</d>
<d>0.6351931</d>
<d>0.63948403</d>
<d>0.64377652</d>
<d>0.648069</d>
<d>0.65235993</d>
<d>0.65665242</d>
<d>0.66094335</d>
<d>0.66523584</d>
<d>0.66952832</d>
<d>0.67381925</d>
<d>0.67811174</d>
<d>0.68240267</d>
<d>0.68669516</d>
<d>0.69098609</d>
<d>0.69527858</d>
<d>0.69957106</d>
<d>0.70386199</d>
<d>0.70815448</d>
<d>0.71244541</d>
<d>0.7167379</d>
<d>0.72103038</d>
<d>0.72532131</d>
<d>0.7296138</d>
<d>0.73390473</d>
<d>0.73819722</d>
<d>0.74248815</d>
<d>0.74678063</d>
<d>0.75107312</d>
<d>0.75536405</d>
<d>0.75965654</d>
<d>0.76394747</d>
<d>0.76823996</d>
<d>0.77253244</d>
<d>0.77682337</d>
<d>0.78111586</d>
<d>0.78540679</d>
<d>0.78969928</d>
<d>0.79399176</d>
<d>0.79828269</d>
<d>0.80257518</d>
<d>0.80686611</d>
<d>0.8111586</d>
<d>0.81544953</d>
<d>0.81974201</d>
<d>0.8240345</d>
<d>0.82832543</d>
<d>0.83261792</d>
<d>0.83690885</d>
<d>0.84120134</d>
<d>0.84549382</d>
<d>0.84978475</d>
<d>0.85407724</d>
<d>0.85836817</d>
<d>0.86266066</d>
<d>0.86695314</d>
<d>0.87124407</d>
<d>0.87553656</d>
<d>0.87982749</d>
<d>0.88411998</d>
<d>0.88841091</d>
<d>0.89270339</d>
<d>0.89699588</d>
<d>0.90128681</d>
<d>0.9055793</d>
<d>0.90987023</d>
<d>0.91416272</d>
<d>0.9184552</d>
<d>0.92274613</d>
<d>0.92703862</d>
<d>0.93132955</d>
<d>0.93562204</d>
<d>0.93991297</d>
<d>0.94420545</d>
<d>0.94849794</d>
<d>0.95278887</d>
<d>0.95708136</d>
<d>0.96137229</d>
<d>0.96566477</d>
<d>0.96995726</d>
<d>0.97424819</d>
<d>0.97854068</d>
<d>0.98283161</d>
<d>0.9871241</d>
<d>0.99141658</d>
<d>0.99570751</d>
<d>1</d>
</Subcolumn>
</XColumn>
<XAdvancedColumn Version="1" Width="77" Decimals="8" Subcolumns="1">
<Title></Title>
<Subcolumn>
<d>0</d>
<d>0.00483165</d>
<d>0.00966154</d>
<d>0.01449319</d>
<d>0.01932308</d>
<d>0.02415472</d>
<d>0.02898637</d>
<d>0.03381626</d>
<d>0.03864791</d>
<d>0.0434778</d>
<d>0.04830945</d>
<d>0.05313934</d>
<d>0.05797099</d>
<d>0.06280264</d>
<d>0.06763253</d>
<d>0.07246417</d>
<d>0.07729407</d>
<d>0.08212571</d>
<d>0.08695736</d>
<d>0.09178725</d>
<d>0.0966189</d>
<d>0.10144879</d>
<d>0.10628044</d>
<d>0.11111033</d>
<d>0.11594198</d>
<d>0.12077362</d>
<d>0.12560352</d>
<d>0.13043516</d>
<d>0.13526506</d>
<d>0.1400967</d>
<d>0.14492835</d>
<d>0.14975824</d>
<d>0.15458989</d>
<d>0.15941978</d>
<d>0.16425143</d>
<d>0.16908307</d>
<d>0.17391297</d>
<d>0.17874461</d>
<d>0.18357451</d>
<d>0.18840615</d>
<d>0.19323605</d>
<d>0.19806769</d>
<d>0.20289934</d>
<d>0.20772923</d>
<d>0.21256088</d>
<d>0.21739077</d>
<d>0.22222242</d>
<d>0.22705406</d>
<d>0.23188396</d>
<d>0.2367156</d>
<d>0.2415455</d>
<d>0.24637714</d>
<d>0.25120879</d>
<d>0.25603868</d>
<d>0.26087033</d>
<d>0.26570022</d>
<d>0.27053187</d>
<d>0.27536176</d>
<d>0.28019341</d>
<d>0.28502505</d>
<d>0.28985495</d>
<d>0.29468659</d>
<d>0.29951648</d>
<d>0.30434813</d>
<d>0.30917978</d>
<d>0.31400967</d>
<d>0.31884132</d>
<d>0.32367121</d>
<d>0.32850286</d>
<d>0.33333275</d>
<d>0.3381644</d>
<d>0.34299604</d>
<d>0.34782593</d>
<d>0.35265758</d>
<d>0.35748747</d>
<d>0.36231912</d>
<d>0.36715077</d>
<d>0.37198066</d>
<d>0.37681231</d>
<d>0.3816422</d>
<d>0.38647384</d>
<d>0.39130549</d>
<d>0.39613538</d>
<d>0.40096703</d>
<d>0.40579692</d>
<d>0.41062857</d>
<d>0.41545846</d>
<d>0.42029011</d>
<d>0.42512176</d>
<d>0.42995165</d>
<d>0.43478329</d>
<d>0.43961319</d>
<d>0.44444483</d>
<d>0.44927648</d>
<d>0.45410637</d>
<d>0.45893802</d>
<d>0.46376791</d>
<d>0.46859956</d>
<d>0.47342945</d>
<d>0.4782611</d>
<d>0.48309274</d>
<d>0.48792264</d>
<d>0.49275428</d>
<d>0.49758418</d>
<d>0.50241582</d>
<d>0.50724747</d>
<d>0.51207736</d>
<d>0.51690901</d>
<d>0.5217389</d>
<d>0.52657055</d>
<d>0.53140219</d>
<d>0.53623209</d>
<d>0.54106373</d>
<d>0.54589363</d>
<d>0.55072527</d>
<d>0.55555517</d>
<d>0.56038681</d>
<d>0.56521846</d>
<d>0.57004835</d>
<d>0.57488</d>
<d>0.57970989</d>
<d>0.58454154</d>
<d>0.58937318</d>
<d>0.59420308</d>
<d>0.59903472</d>
<d>0.60386462</d>
<d>0.60869626</d>
<d>0.61352791</d>
<d>0.6183578</d>
<d>0.62318945</d>
<d>0.62801934</d>
<d>0.63285099</d>
<d>0.63768088</d>
<d>0.64251253</d>
<d>0.64734417</d>
<d>0.65217407</d>
<d>0.65700571</d>
<d>0.6618356</d>
<d>0.66666725</d>
<d>0.6714989</d>
<d>0.67632879</d>
<d>0.68116044</d>
<d>0.68599033</d>
<d>0.69082198</d>
<d>0.69565187</d>
<d>0.70048352</d>
<d>0.70531516</d>
<d>0.71014505</d>
<d>0.7149767</d>
<d>0.71980659</d>
<d>0.72463824</d>
<d>0.72946989</d>
<d>0.73429978</d>
<d>0.73913143</d>
<d>0.74396132</d>
<d>0.74879296</d>
<d>0.75362461</d>
<d>0.7584545</d>
<d>0.76328615</d>
<d>0.76811604</d>
<d>0.77294769</d>
<d>0.77777758</d>
<d>0.78260923</d>
<d>0.78744087</d>
<d>0.79227077</d>
<d>0.79710241</d>
<d>0.80193231</d>
<d>0.80676395</d>
<d>0.8115956</d>
<d>0.81642549</d>
<d>0.82125714</d>
<d>0.82608703</d>
<d>0.83091868</d>
<d>0.83574857</d>
<d>0.84058022</d>
<d>0.84541186</d>
<d>0.85024176</d>
<d>0.8550734</d>
<d>0.8599033</d>
<d>0.86473494</d>
<d>0.86956659</d>
<d>0.87439648</d>
<d>0.87922813</d>
<d>0.88405802</d>
<d>0.88888967</d>
<d>0.89372131</d>
<d>0.89855121</d>
<d>0.90338285</d>
<d>0.90821275</d>
<d>0.91304439</d>
<d>0.91787429</d>
<d>0.92270593</d>
<d>0.92753758</d>
<d>0.93236747</d>
<d>0.93719912</d>
<d>0.94202901</d>
<d>0.94686066</d>
<d>0.9516923</d>
<d>0.9565222</d>
<d>0.96135384</d>
<d>0.96618374</d>
<d>0.97101538</d>
<d>0.97584703</d>
<d>0.98067692</d>
<d>0.98550857</d>
<d>0.99033846</d>
<d>0.99517011</d>
<d>1</d>
<d>0</d>
<d>0.00671242</d>
<d>0.01342241</d>
<d>0.02013483</d>
<d>0.02684482</d>
<d>0.03355724</d>
<d>0.04026967</d>
<d>0.04697965</d>
<d>0.05369208</d>
<d>0.06040206</d>
<d>0.06711449</d>
<d>0.07382447</d>
<d>0.0805369</d>
<d>0.08724932</d>
<d>0.09395931</d>
<d>0.10067173</d>
<d>0.10738172</d>
<d>0.11409414</d>
<d>0.12080656</d>
<d>0.12751655</d>
<d>0.13422897</d>
<d>0.14093896</d>
<d>0.14765138</d>
<d>0.15436137</d>
<d>0.16107379</d>
<d>0.16778622</d>
<d>0.1744962</d>
<d>0.18120863</d>
<d>0.18791861</d>
<d>0.19463104</d>
<d>0.20134346</d>
<d>0.20805345</d>
<d>0.21476587</d>
<d>0.22147586</d>
<d>0.22818828</d>
<d>0.2349007</d>
<d>0.24161069</d>
<d>0.24832311</d>
<d>0.2550331</d>
<d>0.26174552</d>
<d>0.26845551</d>
<d>0.27516793</d>
<d>0.28188035</d>
<d>0.28859034</d>
<d>0.29530277</d>
<d>0.30201275</d>
<d>0.30872518</d>
<d>0.3154376</d>
<d>0.32214759</d>
<d>0.32886001</d>
<d>0.33557</d>
<d>0.34228242</d>
<d>0.34899484</d>
<d>0.35570483</d>
<d>0.36241725</d>
<d>0.36912724</d>
<d>0.37583966</d>
<d>0.38254965</d>
<d>0.38926207</d>
<d>0.39597449</d>
<d>0.40268448</d>
<d>0.4093969</d>
<d>0.41610689</d>
<d>0.42281931</d>
<d>0.42953174</d>
<d>0.43624173</d>
<d>0.44295415</d>
<d>0.44966414</d>
<d>0.45637656</d>
<d>0.46308655</d>
<d>0.46979897</d>
<d>0.47651139</d>
<d>0.48322138</d>
<d>0.4899338</d>
<d>0.49664379</d>
<d>0.50335621</d>
<d>0.51006863</d>
<d>0.51677862</d>
<d>0.52349104</d>
<d>0.53020103</d>
<d>0.53691345</d>
<d>0.54362588</d>
<d>0.55033586</d>
<d>0.55704829</d>
<d>0.56375827</d>
<d>0.5704707</d>
<d>0.57718069</d>
<d>0.58389311</d>
<d>0.59060553</d>
<d>0.59731552</d>
<d>0.60402794</d>
<d>0.61073793</d>
<d>0.61745035</d>
<d>0.62416277</d>
<d>0.63087276</d>
<d>0.63758518</d>
<d>0.64429517</d>
<d>0.65100759</d>
<d>0.65771758</d>
<d>0.66443</d>
<d>0.67114243</d>
<d>0.67785241</d>
<d>0.68456484</d>
<d>0.69127482</d>
<d>0.69798725</d>
<d>0.70469967</d>
<d>0.71140966</d>
<d>0.71812208</d>
<d>0.72483207</d>
<d>0.73154449</d>
<d>0.73825691</d>
<d>0.7449669</d>
<d>0.75167932</d>
<d>0.75838931</d>
<d>0.76510173</d>
<d>0.77181172</d>
<d>0.77852414</d>
<d>0.78523657</d>
<d>0.79194655</d>
<d>0.79865898</d>
<d>0.80536896</d>
<d>0.81208139</d>
<d>0.81879381</d>
<d>0.8255038</d>
<d>0.83221622</d>
<d>0.83892621</d>
<d>0.84563863</d>
<d>0.85235105</d>
<d>0.85906104</d>
<d>0.86577346</d>
<d>0.87248345</d>
<d>0.87919587</d>
<d>0.88590586</d>
<d>0.89261828</d>
<d>0.89933071</d>
<d>0.90604069</d>
<d>0.91275312</d>
<d>0.9194631</d>
<d>0.92617553</d>
<d>0.93288795</d>
<d>0.93959794</d>
<d>0.94631036</d>
<d>0.95302035</d>
<d>0.95973277</d>
<d>0.96644276</d>
<d>0.97315518</d>
<d>0.9798676</d>
<d>0.98657759</d>
<d>0.99329001</d>
<d>1</d>
<d>0</d>
<d>0.00429249</d>
<d>0.00858342</d>
<d>0.0128759</d>
<d>0.01716683</d>
<d>0.02145932</d>
<d>0.02575181</d>
<d>0.03004274</d>
<d>0.03433523</d>
<d>0.03862616</d>
<d>0.04291864</d>
<d>0.04720957</d>
<d>0.05150206</d>
<d>0.05579455</d>
<d>0.06008548</d>
<d>0.06437796</d>
<d>0.06866889</d>
<d>0.07296138</d>
<d>0.07725387</d>
<d>0.0815448</d>
<d>0.08583728</d>
<d>0.09012821</d>
<d>0.0944207</d>
<d>0.09871163</d>
<d>0.10300412</d>
<d>0.10729661</d>
<d>0.11158754</d>
<d>0.11588002</d>
<d>0.12017095</d>
<d>0.12446344</d>
<d>0.12875593</d>
<d>0.13304686</d>
<d>0.13733934</d>
<d>0.14163027</d>
<d>0.14592276</d>
<d>0.15021525</d>
<d>0.15450618</d>
<d>0.15879866</d>
<d>0.16308959</d>
<d>0.16738208</d>
<d>0.17167301</d>
<d>0.1759655</d>
<d>0.18025799</d>
<d>0.18454892</d>
<d>0.1888414</d>
<d>0.19313233</d>
<d>0.19742482</d>
<d>0.20171731</d>
<d>0.20600824</d>
<d>0.21030072</d>
<d>0.21459165</d>
<d>0.21888414</d>
<d>0.22317663</d>
<d>0.22746756</d>
<d>0.23176004</d>
<d>0.23605097</d>
<d>0.24034346</d>
<d>0.24463439</d>
<d>0.24892688</d>
<d>0.25321937</d>
<d>0.2575103</d>
<d>0.26180278</d>
<d>0.26609371</d>
<d>0.2703862</d>
<d>0.27467869</d>
<d>0.27896962</d>
<d>0.2832621</d>
<d>0.28755303</d>
<d>0.29184552</d>
<d>0.29613645</d>
<d>0.30042894</d>
<d>0.30472142</d>
<d>0.30901235</d>
<d>0.31330484</d>
<d>0.31759577</d>
<d>0.32188826</d>
<d>0.32618075</d>
<d>0.33047168</d>
<d>0.33476416</d>
<d>0.33905509</d>
<d>0.34334758</d>
<d>0.34764007</d>
<d>0.351931</d>
<d>0.35622348</d>
<d>0.36051441</d>
<d>0.3648069</d>
<d>0.36909783</d>
<d>0.37339032</d>
<d>0.3776828</d>
<d>0.38197373</d>
<d>0.38626622</d>
<d>0.39055715</d>
<d>0.39484964</d>
<d>0.39914213</d>
<d>0.40343306</d>
<d>0.40772554</d>
<d>0.41201647</d>
<d>0.41630896</d>
<d>0.42059989</d>
<d>0.42489238</d>
<d>0.42918486</d>
<d>0.43347579</d>
<d>0.43776828</d>
<d>0.44205921</d>
<d>0.4463517</d>
<d>0.45064418</d>
<d>0.45493511</d>
<d>0.4592276</d>
<d>0.46351853</d>
<d>0.46781102</d>
<d>0.47210351</d>
<d>0.47639444</d>
<d>0.48068692</d>
<d>0.48497785</d>
<d>0.48927034</d>
<d>0.49356127</d>
<d>0.49785376</d>
<d>0.50214624</d>
<d>0.50643717</d>
<d>0.51072966</d>
<d>0.51502059</d>
<d>0.51931308</d>
<d>0.52360556</d>
<d>0.52789649</d>
<d>0.53218898</d>
<d>0.53647991</d>
<d>0.5407724</d>
<d>0.54506489</d>
<d>0.54935582</d>
<d>0.5536483</d>
<d>0.55793923</d>
<d>0.56223172</d>
<d>0.56652265</d>
<d>0.57081514</d>
<d>0.57510762</d>
<d>0.57939855</d>
<d>0.58369104</d>
<d>0.58798197</d>
<d>0.59227446</d>
<d>0.59656694</d>
<d>0.60085787</d>
<d>0.60515036</d>
<d>0.60944129</d>
<d>0.61373378</d>
<d>0.61802471</d>
<d>0.6223172</d>
<d>0.62660968</d>
<d>0.63090061</d>
<d>0.6351931</d>
<d>0.63948403</d>
<d>0.64377652</d>
<d>0.648069</d>
<d>0.65235993</d>
<d>0.65665242</d>
<d>0.66094335</d>
<d>0.66523584</d>
<d>0.66952832</d>
<d>0.67381925</d>
<d>0.67811174</d>
<d>0.68240267</d>
<d>0.68669516</d>
<d>0.69098609</d>
<d>0.69527858</d>
<d>0.69957106</d>
<d>0.70386199</d>
<d>0.70815448</d>
<d>0.71244541</d>
<d>0.7167379</d>
<d>0.72103038</d>
<d>0.72532131</d>
<d>0.7296138</d>
<d>0.73390473</d>
<d>0.73819722</d>
<d>0.74248815</d>
<d>0.74678063</d>
<d>0.75107312</d>
<d>0.75536405</d>
<d>0.75965654</d>
<d>0.76394747</d>
<d>0.76823996</d>
<d>0.77253244</d>
<d>0.77682337</d>
<d>0.78111586</d>
<d>0.78540679</d>
<d>0.78969928</d>
<d>0.79399176</d>
<d>0.79828269</d>
<d>0.80257518</d>
<d>0.80686611</d>
<d>0.8111586</d>
<d>0.81544953</d>
<d>0.81974201</d>
<d>0.8240345</d>
<d>0.82832543</d>
<d>0.83261792</d>
<d>0.83690885</d>
<d>0.84120134</d>
<d>0.84549382</d>
<d>0.84978475</d>
<d>0.85407724</d>
<d>0.85836817</d>
<d>0.86266066</d>
<d>0.86695314</d>
<d>0.87124407</d>
<d>0.87553656</d>
<d>0.87982749</d>
<d>0.88411998</d>
<d>0.88841091</d>
<d>0.89270339</d>
<d>0.89699588</d>
<d>0.90128681</d>
<d>0.9055793</d>
<d>0.90987023</d>
<d>0.91416272</d>
<d>0.9184552</d>
<d>0.92274613</d>
<d>0.92703862</d>
<d>0.93132955</d>
<d>0.93562204</d>
<d>0.93991297</d>
<d>0.94420545</d>
<d>0.94849794</d>
<d>0.95278887</d>
<d>0.95708136</d>
<d>0.96137229</d>
<d>0.96566477</d>
<d>0.96995726</d>
<d>0.97424819</d>
<d>0.97854068</d>
<d>0.98283161</d>
<d>0.9871241</d>
<d>0.99141658</d>
<d>0.99570751</d>
<d>1</d>
</Subcolumn>
</XAdvancedColumn>
<YColumn Width="81" Decimals="8" Subcolumns="1">
<Title></Title>
<Subcolumn>
<d>0.45577813</d>
<d>0.49276737</d>
<d>0.73860555</d>
<d>0.76627128</d>
<d>0.6435929</d>
<d>0.73902429</d>
<d>0.36782434</d>
<d>0.54704485</d>
<d>0.66473531</d>
<d>0.49401221</d>
<d>0.53333162</d>
<d>0.51654475</d>
<d>0.42890716</d>
<d>0.36066293</d>
<d>0.44397347</d>
<d>0.38277671</d>
<d>0.4845947</d>
<d>0.61156879</d>
<d>0.47715697</d>
<d>0.59764762</d>
<d>1</d>
<d>0.82575602</d>
<d>0.73341252</d>
<d>0.76596078</d>
<d>0.54899045</d>
<d>0.48309063</d>
<d>0.36947654</d>
<d>0.51081049</d>
<d>0.48065507</d>
<d>0.83091486</d>
<d>0.60935542</d>
<d>0.64312573</d>
<d>0.48555753</d>
<d>0.51032622</d>
<d>0.74010107</d>
<d>0.61149757</d>
<d>0.60633873</d>
<d>0.45811114</d>
<d>0.70043128</d>
<d>0.3813581</d>
<d>0.27713589</d>
<d>0.41226271</d>
<d>0.40647148</d>
<d>0.36163146</d>
<d>0.41307457</d>
<d>0.30031506</d>
<d>0.22788906</d>
<d>0.37277808</d>
<d>0.47938174</d>
<d>0.4525421</d>
<d>0.36405563</d>
<d>0.5514488</d>
<d>0.69437228</d>
<d>0.39512545</d>
<d>0.47931052</d>
<d>0.50801885</d>
<d>0.47603177</d>
<d>0.41350755</d>
<d>0.39632757</d>
<d>0.64817347</d>
<d>0.6572463</d>
<d>0.3960655</d>
<d>0.54596807</d>
<d>0.63089378</d>
<d>0.46638067</d>
<d>0.43202354</d>
<d>0.31053018</d>
<d>0.44341799</d>
<d>0.57559935</d>
<d>0.45577813</d>
<d>0.54954023</d>
<d>0.47388961</d>
<d>0.45556163</d>
<d>0.49905996</d>
<d>0.34963025</d>
<d>0.3701773</d>
<d>0.42763953</d>
<d>0.3886648</d>
<d>0.3078183</d>
<d>0.31124234</d>
<d>0.30592113</d>
<d>0.21895012</d>
<d>0.20003817</d>
<d>0.37923589</d>
<d>0.35592284</d>
<d>0.35622194</d>
<d>0.467033</d>
<d>0.40280816</d>
<d>0.37328798</d>
<d>0.61746257</d>
<d>0.59847941</d>
<d>0.53988913</d>
<d>0.4969235</d>
<d>0.32253709</d>
<d>0.47519997</d>
<d>0.611546</d>
<d>0.56263246</d>
<d>0.40338358</d>
<d>0.35279506</d>
<d>0.42949967</d>
<d>0.46287402</d>
<d>0.48329003</d>
<d>0.37950935</d>
<d>0.43880324</d>
<d>0.64218568</d>
<d>0.59106447</d>
<d>0.56237609</d>
<d>0.50812994</d>
<d>0.48964814</d>
<d>0.48792473</d>
<d>0.602721</d>
<d>0.54945762</d>
<d>0.51772977</d>
<d>0.72181582</d>
<d>0.44651729</d>
<d>0.25321039</d>
<d>0.41207755</d>
<d>0.69551457</d>
<d>0.7333584</d>
<d>0.61902931</d>
<d>0.60117135</d>
<d>0.5099616</d>
<d>0.42765662</d>
<d>0.35245892</d>
<d>0.33501402</d>
<d>0.30309815</d>
<d>0.41113751</d>
<d>0.47388961</d>
<d>0.52286867</d>
<d>0.44836604</d>
<d>0.31318509</d>
<d>0.29088045</d>
<d>0.30613192</d>
<d>0.42591611</d>
<d>0.48574839</d>
<d>0.44958524</d>
<d>0.49279586</d>
<d>0.47611438</d>
<d>0.48426426</d>
<d>0.62101764</d>
<d>0.41168729</d>
<d>0.38037248</d>
<d>0.33941512</d>
<d>0.25312493</d>
<d>0.36735717</d>
<d>0.40381942</d>
<d>0.43502313</d>
<d>0.28513195</d>
<d>0.4471098</d>
<d>0.42780759</d>
<d>0.32009583</d>
<d>0.40158896</d>
<d>0.50305656</d>
<d>0.36089652</d>
<d>0.41498314</d>
<d>0.44579943</d>
<d>0.60300016</d>
<d>0.54782537</d>
<d>0.39111176</d>
<d>0.38738862</d>
<d>0.29147866</d>
<d>0.21522983</d>
<d>0.33127948</d>
<d>0.29645803</d>
<d>0.44924911</d>
<d>0.433539</d>
<d>0.40430938</d>
<d>0.22056528</d>
<d>0.34994645</d>
<d>0.3654543</d>
<d>0.40208462</d>
<d>0.26288998</d>
<d>0.51771553</d>
<d>0.48188282</d>
<d>0.52517035</d>
<d>0.47659864</d>
<d>0.51132609</d>
<d>0.49706308</d>
<d>0.37784576</d>
<d>0.31889941</d>
<d>0.26003566</d>
<d>0.21841742</d>
<d>0.18335099</d>
<d>0.23801304</d>
<d>0.33866879</d>
<d>0.72871516</d>
<d>0.55624302</d>
<d>0.35529044</d>
<d>0.41029432</d>
<d>0.44716107</d>
<d>0.47688065</d>
<d>0.48396516</d>
<d>0.46417869</d>
<d>0.5695432</d>
<d>0.62174688</d>
<d>0.6501561</d>
<d>0.62703676</d>
<d>0.65356589</d>
<d>0.58684567</d>
<d>0.33279779</d>
<d>0.62926153</d>
<d>0.31646954</d>
<d>0.44748581</d>
<d>0.51660457</d>
<d>0.77126205</d>
<d>0.93082143</d>
<d>0.58039072</d>
<d>0.48426426</d>
</Subcolumn>
</YColumn>
<YColumn Width="81" Decimals="8" Subcolumns="1">
<Title></Title>
<Subcolumn>
<d></d>
<d></d>
<d></d>
<d></d>
<d></d>
<d></d>
<d></d>
<d></d>
<d></d>
<d></d>
<d></d>
<d></d>
<d></d>
<d></d>
<d></d>
<d></d>
<d></d>
<d></d>
<d></d>
<d></d>
<d></d>
<d></d>
<d></d>
<d></d>
<d></d>
<d></d>
<d></d>
<d></d>
<d></d>
<d></d>
<d></d>
<d></d>
<d></d>
<d></d>
<d></d>
<d></d>
<d></d>
<d></d>
<d></d>
<d></d>
<d></d>
<d></d>
<d></d>
<d></d>
<d></d>
<d></d>
<d></d>
<d></d>
<d></d>
<d></d>
<d></d>
<d></d>
<d></d>
<d></d>
<d></d>
<d></d>
<d></d>
<d></d>
<d></d>
<d></d>
<d></d>
<d></d>
<d></d>
<d></d>
<d></d>
<d></d>
<d></d>
<d></d>
<d></d>
<d></d>
<d></d>
<d></d>
<d></d>
<d></d>
<d></d>
<d></d>
<d></d>
<d></d>
<d></d>
<d></d>
<d></d>
<d></d>
<d></d>
<d></d>
<d></d>
<d></d>
<d></d>
<d></d>
<d></d>
<d></d>
<d></d>
<d></d>
<d></d>
<d></d>
<d></d>
<d></d>
<d></d>
<d></d>
<d></d>
<d></d>
<d></d>
<d></d>
<d></d>
<d></d>
<d></d>
<d></d>
<d></d>
<d></d>
<d></d>
<d></d>
<d></d>
<d></d>
<d></d>
<d></d>
<d></d>
<d></d>
<d></d>
<d></d>
<d></d>
<d></d>
<d></d>
<d></d>
<d></d>
<d></d>
<d></d>
<d></d>
<d></d>
<d></d>
<d></d>
<d></d>
<d></d>
<d></d>
<d></d>
<d></d>
<d></d>
<d></d>
<d></d>
<d></d>
<d></d>
<d></d>
<d></d>
<d></d>
<d></d>
<d></d>
<d></d>
<d></d>
<d></d>
<d></d>
<d></d>
<d></d>
<d></d>
<d></d>
<d></d>
<d></d>
<d></d>
<d></d>
<d></d>
<d></d>
<d></d>
<d></d>
<d></d>
<d></d>
<d></d>
<d></d>
<d></d>
<d></d>
<d></d>
<d></d>
<d></d>
<d></d>
<d></d>
<d></d>
<d></d>
<d></d>
<d></d>
<d></d>
<d></d>
<d></d>
<d></d>
<d></d>
<d></d>
<d></d>
<d></d>
<d></d>
<d></d>
<d></d>
<d></d>
<d></d>
<d></d>
<d></d>
<d></d>
<d></d>
<d></d>
<d></d>
<d></d>
<d></d>
<d></d>
<d></d>
<d></d>
<d></d>
<d></d>
<d></d>
<d></d>
<d></d>
<d></d>
<d></d>
<d></d>
<d></d>
<d>1</d>
<d>0.41919375</d>
<d>0.77358125</d>
<d>0.49190625</d>
<d>0.40807188</d>
<d>0.4300875</d>
<d>0.49590625</d>
<d>0.57210938</d>
<d>0.6952875</d>
<d>0.402425</d>
<d>0.24475625</d>
<d>0.27044063</d>
<d>0.28555313</d>
<d>0.40045938</d>
<d>0.44635938</d>
<d>0.23757188</d>
<d>0.29591563</d>
<d>0.49325313</d>
<d>0.42749063</d>
<d>0.52004688</d>
<d>0.44945625</d>
<d>0.40883438</d>
<d>0.71445625</d>
<d>0.88129688</d>
<d>0.33005938</d>
<d>0.52794688</d>
<d>0.54082813</d>
<d>0.63380313</d>
<d>0.55271875</d>
<d>0.53733125</d>
<d>0.69016875</d>
<d>0.53060625</d>
<d>0.36385313</d>
<d>0.5407875</d>
<d>0.69818125</d>
<d>0.5816375</d>
<d>0.50065313</d>
<d>0.32932813</d>
<d>0.50866875</d>
<d>0.38042188</d>
<d>0.46156563</d>
<d>0.54320625</d>
<d>0.61969688</d>
<d>0.48966563</d>
<d>0.34449063</d>
<d>0.18582188</d>
<d>0.59689688</d>
<d>0.40514688</d>
<d>0.35691875</d>
<d>0.41568438</d>
<d>0.47069063</d>
<d>0.52334688</d>
<d>0.51758438</d>
<d>0.29058438</d>
<d>0.26842188</d>
<d>0.24760313</d>
<d>0.34499375</d>
<d>0.31874063</d>
<d>0.31631875</d>
<d>0.264725</d>
<d>0.35141563</d>
<d>0.39565625</d>
<d>0.25477188</d>
<d>0.28380938</d>
<d>0.29346875</d>
<d>0.39509063</d>
<d>0.4279</d>
<d>0.57939688</d>
<d>0.21788438</d>
<d>0.26945938</d>
<d>0.29488125</d>
<d>0.34810625</d>
<d>0.38030313</d>
<d>0.298725</d>
<d>0.32274688</d>
<d>0.28718438</d>
<d>0.41955625</d>
<d>0.47216563</d>
<d>0.47858125</d>
<d>0.24601875</d>
<d>0.46148438</d>
<d>0.3286875</d>
<d>0.45905313</d>
<d>0.42454375</d>
<d>0.56573125</d>
<d>0.65021563</d>
<d>0.74652188</d>
<d>0.69316875</d>
<d>0.47312813</d>
<d>0.46757188</d>
<d>0.17791875</d>
<d>0.44014063</d>
<d>0.4367</d>
<d>0.42505</d>
<d>0.3589375</d>
<d>0.38750625</d>
<d>0.43033438</d>
<d>0.51209063</d>
<d>0.51104688</d>
<d>0.39629063</d>
<d>0.55284375</d>
<d>0.47983125</d>
<d>0.39993438</d>
<d>0.36610313</d>
<d>0.61597188</d>
<d>0.46025938</d>
<d>0.53929375</d>
<d>0.464175</d>
<d>0.30711875</d>
<d>0.34068438</d>
<d>0.51994063</d>
<d>0.53839063</d>
<d>0.4045875</d>
<d>0.3728125</d>
<d>0.65205313</d>
<d>0.5990125</d>
<d>0.3580125</d>
<d>0.43076875</d>
<d>0.48049375</d>
<d>0.38727813</d>
<d>0.4951875</d>
<d>0.57277813</d>
<d>0.486975</d>
<d>0.40702813</d>
<d>0.42903438</d>
<d>0.73754688</d>
<d>0.4859375</d>
<d>0.62719688</d>
<d>0.76818125</d>
<d>0.48805313</d>
<d>0.54735625</d>
<d>0.62943438</d>
<d>0.47920625</d>
<d>0.47980938</d>
<d>0.512025</d>
<d>0.4520875</d>
<d>0.7152625</d>
<d>0.6372</d>
<d>0.45775625</d>
<d>0.55032813</d>
<d>0.57772188</d>
<d>0.6879125</d>
<d>0.8905375</d>
<d>0.83684375</d>
<d>0.72136875</d>
<d>0.72922188</d>
<d>0.7628125</d>
<d>0.69797813</d>
<d>0.70681875</d>
<d>0.71875</d>
</Subcolumn>
</YColumn>
<YColumn Width="81" Decimals="8" Subcolumns="1">
<Title></Title>
<Subcolumn>
<d></d>
<d></d>
<d></d>
<d></d>
<d></d>
<d></d>
<d></d>
<d></d>
<d></d>
<d></d>
<d></d>
<d></d>
<d></d>
<d></d>
<d></d>
<d></d>
<d></d>
<d></d>
<d></d>
<d></d>
<d></d>
<d></d>
<d></d>
<d></d>
<d></d>
<d></d>
<d></d>
<d></d>
<d></d>
<d></d>
<d></d>
<d></d>
<d></d>
<d></d>
<d></d>
<d></d>
<d></d>
<d></d>
<d></d>
<d></d>
<d></d>
<d></d>
<d></d>
<d></d>
<d></d>
<d></d>
<d></d>
<d></d>
<d></d>
<d></d>
<d></d>
<d></d>
<d></d>
<d></d>
<d></d>
<d></d>
<d></d>
<d></d>
<d></d>
<d></d>
<d></d>
<d></d>
<d></d>
<d></d>
<d></d>
<d></d>
<d></d>
<d></d>
<d></d>
<d></d>
<d></d>
<d></d>
<d></d>
<d></d>
<d></d>
<d></d>
<d></d>
<d></d>
<d></d>
<d></d>
<d></d>
<d></d>
<d></d>
<d></d>
<d></d>
<d></d>
<d></d>
<d></d>
<d></d>
<d></d>
<d></d>
<d></d>
<d></d>
<d></d>
<d></d>
<d></d>
<d></d>
<d></d>
<d></d>
<d></d>
<d></d>
<d></d>
<d></d>
<d></d>
<d></d>
<d></d>
<d></d>
<d></d>
<d></d>
<d></d>
<d></d>
<d></d>
<d></d>
<d></d>
<d></d>
<d></d>
<d></d>
<d></d>
<d></d>
<d></d>
<d></d>
<d></d>
<d></d>
<d></d>
<d></d>
<d></d>
<d></d>
<d></d>
<d></d>
<d></d>
<d></d>
<d></d>
<d></d>
<d></d>
<d></d>
<d></d>
<d></d>
<d></d>
<d></d>
<d></d>
<d></d>
<d></d>
<d></d>
<d></d>
<d></d>
<d></d>
<d></d>
<d></d>
<d></d>
<d></d>
<d></d>
<d></d>
<d></d>
<d></d>
<d></d>
<d></d>
<d></d>
<d></d>
<d></d>
<d></d>
<d></d>
<d></d>
<d></d>
<d></d>
<d></d>
<d></d>
<d></d>
<d></d>
<d></d>
<d></d>
<d></d>
<d></d>
<d></d>
<d></d>
<d></d>
<d></d>
<d></d>
<d></d>
<d></d>
<d></d>
<d></d>
<d></d>
<d></d>
<d></d>
<d></d>
<d></d>
<d></d>
<d></d>
<d></d>
<d></d>
<d></d>
<d></d>
<d></d>
<d></d>
<d></d>
<d></d>
<d></d>
<d></d>
<d></d>
<d></d>
<d></d>
<d></d>
<d></d>
<d></d>
<d></d>
<d></d>
<d></d>
<d></d>
<d></d>
<d></d>
<d></d>
<d></d>
<d></d>
<d></d>
<d></d>
<d></d>
<d></d>
<d></d>
<d></d>
<d></d>
<d></d>
<d></d>
<d></d>
<d></d>
<d></d>
<d></d>
<d></d>
<d></d>
<d></d>
<d></d>
<d></d>
<d></d>
<d></d>
<d></d>
<d></d>
<d></d>
<d></d>
<d></d>
<d></d>
<d></d>
<d></d>
<d></d>
<d></d>
<d></d>
<d></d>
<d></d>
<d></d>
<d></d>
<d></d>
<d></d>
<d></d>
<d></d>
<d></d>
<d></d>
<d></d>
<d></d>
<d></d>
<d></d>
<d></d>
<d></d>
<d></d>
<d></d>
<d></d>
<d></d>
<d></d>
<d></d>
<d></d>
<d></d>
<d></d>
<d></d>
<d></d>
<d></d>
<d></d>
<d></d>
<d></d>
<d></d>
<d></d>
<d></d>
<d></d>
<d></d>
<d></d>
<d></d>
<d></d>
<d></d>
<d></d>
<d></d>
<d></d>
<d></d>
<d></d>
<d></d>
<d></d>
<d></d>
<d></d>
<d></d>
<d></d>
<d></d>
<d></d>
<d></d>
<d></d>
<d></d>
<d></d>
<d></d>
<d></d>
<d></d>
<d></d>
<d></d>
<d></d>
<d></d>
<d></d>
<d></d>
<d></d>
<d></d>
<d></d>
<d></d>
<d></d>
<d></d>
<d></d>
<d></d>
<d></d>
<d></d>
<d></d>
<d></d>
<d></d>
<d></d>
<d></d>
<d></d>
<d></d>
<d></d>
<d></d>
<d></d>
<d></d>
<d></d>
<d></d>
<d></d>
<d></d>
<d></d>
<d></d>
<d></d>
<d></d>
<d></d>
<d></d>
<d></d>
<d></d>
<d></d>
<d></d>
<d></d>
<d></d>
<d></d>
<d></d>
<d></d>
<d></d>
<d></d>
<d></d>
<d></d>
<d></d>
<d></d>
<d></d>
<d></d>
<d>0.42538529</d>
<d>0.51593281</d>
<d>0.37418167</d>
<d>0.74735942</d>
<d>0.50514929</d>
<d>0.60619531</d>
<d>0.74601946</d>
<d>0.80369745</d>
<d>0.75989553</d>
<d>0.55676554</d>
<d>0.51281048</d>
<d>0.47734611</d>
<d>0.83831956</d>
<d>0.47453006</d>
<d>0.27052803</d>
<d>0.43849992</d>
<d>0.58038719</d>
<d>0.53824852</d>
<d>0.59193214</d>
<d>1</d>
<d>0.65097988</d>
<d>0.58208447</d>
<d>0.68658888</d>
<d>0.64378236</d>
<d>0.52440223</d>
<d>0.44280057</d>
<d>0.38230227</d>
<d>0.41431251</d>
<d>0.55981981</d>
<d>0.58685304</d>
<d>0.31882202</d>
<d>0.18773529</d>
<d>0.39913902</d>
<d>0.5219988</d>
<d>0.37624053</d>
<d>0.28209426</d>
<d>0.31823499</d>
<d>0.36591217</d>
<d>0.49074149</d>
<d>0.58015322</d>
<d>0.39930917</d>
<d>0.29479626</d>
<d>0.29499194</d>
<d>0.21974979</d>
<d>0.23048651</d>
<d>0.37960107</d>
<d>0.57465725</d>
<d>0.53080428</d>
<d>0.55636993</d>
<d>0.56371634</d>
<d>0.50044453</d>
<d>0.50804616</d>
<d>0.45458374</d>
<d>0.33913417</d>
<d>0.38439091</d>
<d>0.64268912</d>
<d>0.55287326</d>
<d>0.49255363</d>
<d>0.35976536</d>
<d>0.17871712</d>
<d>0.15963434</d>
<d>0.32929926</d>
<d>0.34825443</d>
<d>0.42104211</d>
<d>0.17646683</d>
<d>0.23186051</d>
<d>0.33705404</d>
<d>0.26222876</d>
<d>0.38406762</d>
<d>0.26346238</d>
<d>0.29184834</d>
<d>0.24325658</d>
<d>0.22182141</d>
<d>0.16341601</d>
<d>0.4153462</d>
<d>0.49273229</d>
<d>0.22746628</d>
<d>0.415125</d>
<d>0.38977629</d>
<d>0.7208409</d>
<d>0.51003697</d>
<d>0.40828055</d>
<d>0.26572118</d>
<d>0.25021163</d>
<d>0.18947086</d>
<d>0.22273599</d>
<d>0.22063459</d>
<d>0.15262824</d>
<d>0.32017475</d>
<d>0.26126739</d>
<d>0.24025761</d>
<d>0.18891361</d>
<d>0.17088578</d>
<d>0.32362037</d>
<d>0.33713911</d>
<d>0.34614877</d>
<d>0.35513717</d>
<d>0.27255712</d>
<d>0.16172723</d>
<d>0.26276475</d>
<d>0.29704655</d>
<d>0.43117479</d>
<d>0.43793416</d>
<d>0.40244001</d>
<d>0.4518315</d>
<d>0.29959035</d>
<d>0.20630336</d>
<d>0.22627094</d>
<d>0.21751226</d>
<d>0.30086226</d>
<d>0.29055942</d>
<d>0.27138731</d>
<d>0.5047154</d>
<d>0.38230227</d>
<d>0.17765791</d>
<d>0.22565414</d>
<d>0.32342469</d>
<d>0.33387215</d>
<d>0.30236812</d>
<d>0.28454448</d>
<d>0.21487913</d>
<d>0.12505902</d>
<d>0.15082036</d>
<d>0.26917531</d>
<d>0.16136991</d>
<d>0.2057461</d>
<d>0.23145214</d>
<d>0.24814851</d>
<d>0.27017496</d>
<d>0.07019708</d>
<d>0.23131601</d>
<d>0.24113391</d>
<d>0.20373829</d>
<d>0.4087187</d>
<d>0.35235515</d>
<d>0.38598611</d>
<d>0.31577626</d>
<d>0.24369898</d>
<d>0.33343401</d>
<d>0.57722232</d>
<d>0.53339487</d>
<d>0.47524045</d>
<d>0.44877298</d>
<d>0.37292252</d>
<d>0.2667421</d>
<d>0.31575925</d>
<d>0.24490282</d>
<d>0.10993232</d>
<d>0.26748653</d>
<d>0.21000847</d>
<d>0.7029492</d>
<d>0.45477942</d>
<d>0.39747151</d>
<d>0.302517</d>
<d>0.27051102</d>
<d>0.55904561</d>
<d>0.36065867</d>
<d>0.19186578</d>
<d>0.20980003</d>
<d>0.43771721</d>
<d>0.27933776</d>
<d>0.2677843</d>
<d>0.33454001</d>
<d>0.3881896</d>
<d>0.23053756</d>
<d>0.27375245</d>
<d>0.28827511</d>
<d>0.57657148</d>
<d>0.51551167</d>
<d>0.47290934</d>
<d>0.45823355</d>
<d>0.19827634</d>
<d>0.4188769</d>
<d>0.29793135</d>
<d>0.39352819</d>
<d>0.41372974</d>
<d>0.32268452</d>
<d>0.40580055</d>
<d>0.56506481</d>
<d>0.42943071</d>
<d>0.27225935</d>
<d>0.39417903</d>
<d>0.30612002</d>
<d>0.31799252</d>
<d>0.29346481</d>
<d>0.42593404</d>
<d>0.37010222</d>
<d>0.44040139</d>
<d>0.45384782</d>
<d>0.41612465</d>
<d>0.48394383</d>
<d>0.57863885</d>
<d>0.46078586</d>
<d>0.46926379</d>
<d>0.68460658</d>
<d>0.63436858</d>
<d>0.37822708</d>
<d>0.43679413</d>
<d>0.38157912</d>
<d>0.3660483</d>
<d>0.43958465</d>
<d>0.58843973</d>
<d>0.46504822</d>
<d>0.49635657</d>
<d>0.38627112</d>
<d>0.43029424</d>
<d>0.58368392</d>
<d>0.46088795</d>
<d>0.34587227</d>
<d>0.43800222</d>
<d>0.50415814</d>
<d>0.66209519</d>
<d>0.55625508</d>
<d>0.23842846</d>
<d>0.5203951</d>
<d>0.33496114</d>
<d>0.1749397</d>
<d>0.35975685</d>
<d>0.30401011</d>
<d>0.2214173</d>
<d>0.21852468</d>
<d>0.34100587</d>
<d>0.1728936</d>
<d>0.17011583</d>
<d>0.35403116</d>
<d>0.43254878</d>
<d>0.50608939</d>
<d>0.79708271</d>
<d>0.71015097</d>
<d>0.34533629</d>
<d>0.51875736</d>
<d>0.61796998</d>
<d>0.39911775</d>
<d>0.68061647</d>
</Subcolumn>
</YColumn>
</Table>
<Table ID="Table16" XFormat="none" TableType="OneWay" EVFormat="AsteriskAfterNumber">
<Title>Copy of Par-6 Early</Title>
<RowTitlesColumn Width="32">
<Subcolumn></Subcolumn>
</RowTitlesColumn>
<YColumn Width="81" Decimals="8" Subcolumns="1">
<Title>Basal</Title>
<Subcolumn>
<d>0.45577813</d>
<d>0.49276737</d>
<d>0.73860555</d>
<d>0.76627128</d>
<d>0.6435929</d>
<d>0.73902429</d>
<d>0.36782434</d>
<d>0.54704485</d>
<d>0.66473531</d>
<d>0.49401221</d>
<d>0.53333162</d>
<d>0.51654475</d>
<d>0.42890716</d>
<d>0.36066293</d>
<d>0.44397347</d>
<d>0.38277671</d>
<d>0.4845947</d>
<d>0.61156879</d>
<d>0.47715697</d>
<d>0.59764762</d>
<d>1</d>
<d>1</d>
<d>0.41919375</d>
<d>0.77358125</d>
<d>0.49190625</d>
<d>0.40807188</d>
<d>0.4300875</d>
<d>0.49590625</d>
<d>0.57210938</d>
<d>0.6952875</d>
<d>0.402425</d>
<d>0.24475625</d>
<d>0.27044063</d>
<d>0.28555313</d>
<d>0.40045938</d>
<d>0.44635938</d>
<d>0.42538529</d>
<d>0.51593281</d>
<d>0.37418167</d>
<d>0.74735942</d>
<d>0.50514929</d>
<d>0.60619531</d>
<d>0.74601946</d>
<d>0.80369745</d>
<d>0.75989553</d>
<d>0.55676554</d>
<d>0.51281048</d>
<d>0.47734611</d>
<d>0.83831956</d>
<d>0.47453006</d>
<d>0.27052803</d>
<d>0.43849992</d>
<d>0.58038719</d>
<d>0.53824852</d>
<d>0.59193214</d>
<d>1</d>
<d>0.65097988</d>
<d>0.58208447</d>
<d>0.68658888</d>
<d>0.64378236</d>
</Subcolumn>
</YColumn>
<YColumn Width="81" Decimals="8" Subcolumns="1">
<Title>Apical</Title>
<Subcolumn>
<d>0.35529044</d>
<d>0.41029432</d>
<d>0.44716107</d>
<d>0.47688065</d>
<d>0.48396516</d>
<d>0.46417869</d>
<d>0.5695432</d>
<d>0.62174688</d>
<d>0.6501561</d>
<d>0.62703676</d>
<d>0.65356589</d>
<d>0.58684567</d>
<d>0.33279779</d>
<d>0.62926153</d>
<d>0.31646954</d>
<d>0.44748581</d>
<d>0.51660457</d>
<d>0.77126205</d>
<d>0.93082143</d>
<d>0.58039072</d>
<d>0.48426426</d>
<d>0.4520875</d>
<d>0.7152625</d>
<d>0.6372</d>
<d>0.45775625</d>
<d>0.55032813</d>
<d>0.57772188</d>
<d>0.6879125</d>
<d>0.8905375</d>
<d>0.83684375</d>
<d>0.72136875</d>
<d>0.72922188</d>
<d>0.7628125</d>
<d>0.69797813</d>
<d>0.70681875</d>
<d>0.71875</d>
<d>0.50415814</d>
<d>0.66209519</d>
<d>0.55625508</d>
<d>0.23842846</d>
<d>0.5203951</d>
<d>0.33496114</d>
<d>0.1749397</d>
<d>0.35975685</d>
<d>0.30401011</d>
<d>0.2214173</d>
<d>0.21852468</d>
<d>0.34100587</d>
<d>0.1728936</d>
<d>0.17011583</d>
<d>0.35403116</d>
<d>0.43254878</d>
<d>0.50608939</d>
<d>0.79708271</d>
<d>0.71015097</d>
<d>0.34533629</d>
<d>0.51875736</d>
<d>0.61796998</d>
<d>0.39911775</d>
<d>0.68061647</d>
</Subcolumn>
</YColumn>
</Table>

<!--Analyses, graphs and layouts as compressed binary. Don&apos;t edit this part of the file.-->

<Template dt:dt="bin.base64" xmlns:dt="urn:schemas-microsoft-com:datatypes">eF7sXQdgFEXbnru0y6VdKIJSXFAQEdIrgrlQRBQwIkUsQCABgyGJSUDAFkEUO1gR
RMGKPxYs2AAFP5HPjgKKDcGCYsWG+onwz7Ozczu3t3u3aZKQeWAyu1PfeWfmndkp
7xUMOPnkwSPyMxw1sYSQBY4FDic1ReQs53JyPnVRwogf8B6uPW9yEOKk78WkzC9M
MAwhg4xOKpw1BccRkk9Y6sg5gprfaA4eaoOIaCG0SwsHmh2aAWAjXiQ1bmpiqEkg
LA0JCQkJCQmJ5gGM507Cxn8JCQkJCQmJ5glxPMf3O/9WjyLsmx7f+Py7XUJCQkJC
QkJCQkJCQkJCQkJCQkJCQkLCHGGkP/3bJ4yQheG6bR8HDx4ke4mDRCVgdZ6QPc6C
iBwS6ffmSuBJRrBzeOFkeyfNJQTuIn07dXqcbQssjkl3FSErcor6fgrRj/XVF7Hq
QUERnfr2zZs5rVSZUVxZVVJe1q9ralJKV6W4bFJ5UUnZlH5dR408uXdO17yT3H27
DDx9wMixBYOUitKSqmqlYFT/oUMGKF17JyfnV1SUFicnDxw5UCkYOuTMkQpNIzl5
0PCuStfzq6sr+iQnX3TRRUmFCJU0qXwaAlYlF1SWVxRXVs8aShPrTSMkFVUXdaXZ
sNT9yKGuRSWTqk9yR/e9oHjWSTQJLbGKypKy6qSCwinFJ5dXTiusTmJWNaW8AF7F
lX2TEYNG1BIwT6G6ZNIFxdVJkyqLC6vLfXGi+1ZVU+8pQvCp5RNZ2L7Jml+IJEuq
i6flV1YWztITLcQrnnSiLNKwUzDE1UgZU1JZXFpcVTW+/xiRPIvENQKrqguri08u
LZwiJogcphRXnpTSN5k/qvQm+7iYzEvhczPNRChBwbBTyitLZpeXVReWjiiuOlwq
xqJYiEmJLj0pO61vsvpgndq/XxOnV5YUU4KraQ87fOrBpFAiB1P9OWie4L9fFWdO
KiylbDp8qsFQIMRR239qE+wHo+kAVDLpMJNHJoXyVUKTlEac4MOuK1gUzFcbTaRL
VE2fOJLlU1FIp2TjS8oml4/nPDOri4JhBQUDCxB2QHlR8fDCacU6q3z8Mc3Kotbs
VlvQRAPrTaw4seZClkKgKD/Dfy4VlASzerKsKKGmhKoS689H5cjKwrKqUnVoO1Ol
RSW7WTPeRpEE8g59LYwsKZ9SGEhjs2K7RRkEekqqynsXHmJeG3PyE6n5RVOnV1UX
F8FxRPEkn4BqThVhTMZeAQ2pBuFycC91xMlJzRHHHu6cme03JImVhDcz4g95O6Ct
+TBvCMYSGpLlldc71W9yF8I5Jz3FzDkzJ70ptwDKiiF0dpKkj90DS6YVl2Gp6PBo
AHYKaEg1CJeDe7EKz800awc5Gf6tpum2g4Dh7HCp/4CCCUQ2zXFaJ35UWaHVOHaY
VE+QEhqSDcLn4F6sIzbLkdqcT8aB7DBsCsYiGtLl1WcxKFs4N++xuqKiyFScHRa1
b1U4gdBD/e1qkVN+wZDRbJNNrxGNzJSUpLQUu8tl1bMqhDoNqBwDw0YaK8pHbLA8
Amm1IjVYKiKl1oTyKbiRUk5o32R1h/Ikd2QNLnA5SZS6tcyQX1lSWKpvrobEWiSh
gaXDlLjUNp0FwgZxpPdS9UrZQYrL1KedXQi5Vb1WBqQR/oZICMXeQIr+hotp+htP
7zr1yXuQkNvIVtxV09zrTq1UUyMhISEhIXGogYF5iU+t3atkhlOqnJE4FHB6c9X5
NVQh9KB/hxWWlfUec35JdVnxLKW6uKpaKZ+sDCivmAW7oLCyd6oylH460VlkD8Nh
ScxPw51sDltQWVI1TaGT/orp9HNdKSxTimcWTqpWCpQZhaXTi5UefVOSUlJSUo/v
pVx0fsmk85XqwguKqxT6ZVCuFE6aVD69rLq6hDoUTisvm8LiVCUpw8uri5Xq8wur
lWnlVf6ZN0HgKCvnUR91pp1I6ISe9v2/me/B50gvoiu3FJGoGSNO9H1PwPRV42M+
L6q4QMpWcCmX0BCdaxGjodGPHKXmzr+SAK5oE/7L1HO47IuPqegQYUxNjGmGbwkv
L1AbZSA4vxtHTTzRv5RQI62oaU1NG2raUnMENe2oaU/NkdSgdB2o6UgNDiXnEYWw
HJGz2hwiEZfRDD+4edX0RxZOnF5aWKlUFldNL62uEuLyGnfSfHkpOG+8Kr0jCssu
qFIqSsurzbJ0tvF9dsKPRQPZA4urJlWWVFSXzChWsCZCv7hLJok5++DSv1WZvEAS
auLmgXnDshUYNWE7MKrMdmDUre3AYKntwGgtJoHdikICA6NZiYFjlCCBUZ+2A6Oh
2g6MFm07MJq+7cDoI7YDo7HbDoxeZzswuqftwOjHtgOj09oODMlgOzBEiO3A6LS2
A0Mo2Q4M6WU7MMSc7cCQh7YDQ3DaDgwJaxL4ZDKQSpQ2PZzkFDRiCQmJwwLo3n5C
QAOEQF0wns5TxtO5UaStFH66vKnanCfjCZt5wYZQ1OZKCFcns1VN9fYapBVO7iB3
aulP1vI7qOEbSgAMB+qpD/mXPgRBFLCohg3/yPw7oZn0om8NQkpcKFro13L1+cWV
SkVl+ZTKwmlVSlG5UlZezXON88uxiuZTXKYgQrFSSA1NvUjz6qVMnF6tXFQ+vbSI
UlBVXVxYRD8LKsorq+Mo4YUVNIOZJdPoh3gg+Ulxcb3V2YpDbQEAGOImX9KKW+R9
vgYuz3v3qLMwHoLjdu+dvg/SB7VUGFyage9D5FLi3w8P0DaASY9GjeBTL5SUFf3Q
r+T1Xav7oJEdOEjaImNAJ4ETyEk4c/o0rFVUqh9E+Zpn3VHCfmpi9kIvI8FhQgLn
oikJ/TXPuoORULHha40EpwkJvDI4CX7rOKM0z7pD48L8yzQSwkxI4O3GR0JxUQlt
rPWvAoaSsgd/ualL9WPf5DESwk1IwHckYCCh/lXAUFL28qCx8358e4dGQoQJCZC4
ACdhYMnkybSDl00q7qPkT6qeXqsd3ECUlF17z6vr/rrhvZcYCZEmJGgbxqYknFJe
NKW4qvfQ4vOn0RaiBawdSsqGl8V+0/UJTkKUj4SHfQta8OHhOQn8nXdYwF4MUUrZ
iyHKJnsxJFWAvRiSKsBeDEkVYC+GpAqwF0NSBdiLIakC7MWQVAH2YkiqAHsxJFWA
vRj/NlW52iEAB4kmxxNbhwAGFVaWziLWpwDErFsywIbAUwAO0jCnACKJeApA3MdG
ylbQTwHYjdHQ4KcAsDPEgY0fAP7+pwDEUDyECDGmGQ7XUwCgHBQDXpVeeQrAPLA8
BeCDS54CEOCSpwAEuOQpAAkJiSYOdG8/IaABQqAukKcAght2CqD2O8MI0Ug7w4Ss
GPJVn+3//T6Pph9kZ1gkoYF3hjWc/IKXkWC1M2xJQn+eRH1xKyfBamdYJKGBd4Y1
7HtYI8FqZ9iPhIbdGSakS+GIc8qO5NuyVjvDJiQ0WBWQU7q5p9zu+lgjwWpnWCQB
qzENuDNMyH935N/70lUrXmIkWO0MW5HQADvDFK5nrjzn5akaCXJn2G4MSRVgL4ak
CrAXQ1IF2IshqQLsxZBUAfZiSKoAezEkVYC9GJIqwF4MSRVgL4ZIFd8Zdtq9Hp4V
6no4Um+Ao/ihTuL7Z94EgQoI3Bh2kobZGMbmkb4xHEv0bUykbAV9Y9hujIYG3xju
jeJoSNJs+PtvDIuheAgRYkwzHK4bw3xFDvCq9MqNYfPAcmPYB5fcGBbgkhvDAlxy
Y1hCQqKJA93bTwhogBCoC+TGcHAjXg8P066HIy98S8LtoAZ5PbzlXg9HGo10CKCk
bPVP5/1z65tP9EUjsz4EIJLQwIcAtIvRo0MdArAkob8WvO5gJHi7vK+RYHUIQCSh
gQ8BaFyYcJVGgtUhAD8SGvYQQEnZLXetTzup+KM8RoLVIQATEupfBQwlZXkr459Y
MY/fULc6BCCSgIW3BjwEUFL23fPnJrd+8H2NBKtDAFYkNMAhgJKynQP3f5L+EidB
HgKwG0NSBdiLIakC7MWQVAH2YkiqAHsxJFWAvRiSKsBeDEkVYC+GpAqwF0NSBdiL
IVLFDwGE2b0enhXyejiSC7nikpKUmZ2dGWTBJeR6i3/mTRCogcBTAGGkYU4BID39
FIC4P42UraCfArAbo6HBTwHkozga+ms2/P1PAYiheAgRYkwzHK6nAEAhKAa86ps8
BWAeWJ4C8MElTwEIcMlTAAJc8hSAhIREEwe6t58Q0AAhUBfIUwDBjXgKwKmdAsAz
PiaR50ENdT4F0BAfgmanAPYIzaQXfWsIUpr0IQBQn5X2758BgN1IZwDKqjte9sng
m2d/nocmZn0GQCShgc8AlLF1hqtWehkJVmcALEnorwWvOzQS0h7VSLA6AyCS0MBn
ADQSqhdrJFidAfAjoWHPAJRVP/7JspSoeTu1tmB1BsCEhPpXAUNZ9Y1K9chxyzgJ
VmcARBKw7taAZwBoRXw2YMsxYy7QSLA6A2BFQgOcASirTrl/91c3/XDbS4wEeQbA
bgxJFWAvhqQKsBdDUgXYiyGpAuzFkFQB9mJIqgB7MSRVgL0YkirAXgxJFWAvhkhV
rtdVw1KIJth6CvpT8CqcXr/EWzLABs6jGJKi1UQswZILM2A1VqhgzpCmSZuhhH0/
49kILH/1QU1ToyyP8v0gXQJ93+NIcPRxehzcbbLqNpm6TfH1Hy2qatB7vDOx7EzI
jWSkFkIhbA0DBi0H4DHwNc/PJ5h1SQCpgkoeJ1bdAOTgZVTzrsBeMPdFo0V470xf
YM0Xrmi/5r6IB0Fj7ot4XDVjoC/i8bIE+iIeRJHRN6Gmr/7i4ySeseiIZ7UDOlgP
5HwQEc1cPCrrGX5V10JBLmz+iwM3ES9h6zmAMSnOMiOQrYgFWsib1QIDz6gNiSPB
y4rE0zIrEtxEdhnz9SsS82RFQtawYYDgRTK+c/CWyMGLxEnng48V6ShuEyWdj4LN
kHTenJoh6VxINkPSRanczEiHOAWaFenXaNJF35ZyaZNV/J4Rzu/4/3SRnLTaAthg
PmnlE1dIxlLNGCdJ0jQtY5y0oltwG726ndbvMGnlHQNHYi+kf18mR/vcuqpuXanb
Meo7764w+myJDT1s0gpXRQjFOzIaFAyftAJmXRJAn8ThQR7H7qSVT3S9M708sDBp
Ra7mvsiDy7zAiSfavZkvk6GiYOOhrCaeIseAOkw8YXg2HEz2BaI2E0+ky4cF7mZW
JDyLw0JgkZBr/8Kq8lIqdysLS2s1QhhLx+f7ZqWzHiFYKcRGVvtSoPPkV5RMqmcB
eMzaFcB6iINixhxi404GG/f6GI+Ps3HQeDIH2YFqwaXFAmywHgdhwLgzHczMIYGy
V5qmY4zjoAgIgB54oPWIcVDEcQS9z7/XGt14vxbFLN7ZOAjXKCEBHgr9DKjNOMjj
BBkHLxfHQRzpR5pwBdR0VKHIqeA5onlPJrqqDHjw0YqHxVl0GN9oFa/acMIDolPh
NUQLrQLuyE5xeIfgGefI14ftPIW7Fzi9hvA15BZqz3esUMOjWBPCK9RnaOsZ6Whz
Kp6voWZz2HOqe1v6Z6Czl+r+KTV7nbG+50vC2DO6p8e1KiCvz6i93rVXTedualZF
b/Y917j154IY9vw+NZ5Il5rmBmpS4v5U3f9LTZsocuqvZKbTf9QGdxTiX7U4bmcH
CrGOp5C6+QWDQhhXOOymqZDm4RcMCmn+ZU8ke6jXVw71tlhpsZJfVlg6a3ZxEe2o
jgHlpdOn4byby+GYUZVEwnxO+XDCPEIR5xEk0eFQKPixzRj2Okg9pVpeaXbONI90
8YujVE2fNq2wchZpzZzPLJlSVjKZTqXKqktnKUUl7OhZtdKjQOmrpCSlZB6fR45j
QU8vK+6NXKovKu9dXVhSWlykZ3K0lho7SakdpSwpUyZpxenVnwcxnHRs5XBgm4ud
d1MmFldfVFxcpkxTDwJWkaO0OOxcIE2Zp0eOsPDpz330VH0H+Ux8DOfrOrMQuZlJ
KSndlAFDkDDnyaRi0iEIvwcMySMdHY5tsrpbUnXrHxcYkDGU05pXqx9gnwyBsP72
O5ew0YldjMPfWPrRH0W6aXFSSVtyMkkgo6jLbNKOLCQnkLX08/8zapwOFrO9ozPJ
chxFCqiZSs2Vjq7kQcfRZKNDod+U3xN9wQFAPsgdNp9A85+jhhjrprmjjKmEbUzD
72TC7hBiojZKC4cp02zC7rzhA2ohNScQ9qW4lhosUyAtjPB4xlTI6WAlRlrtHSxv
jNNZDnZpLZGaAu0ZNE7VnlGGKx1sEQQH3x+kz0cTRt9G+qxQG82Tf3EiL4DXB59c
oYx4RjlqObnCBIZOTwImV1B1PsGh+CZXJJxNrjBxqnBW+IUXgTCZ1EwIS1HjYk7r
Cfeozwo1y8KJL02vm6V5KjULIiao7mdRkxNW44tbEeUJmtd4PITP98WdH87iggaP
m9GA5/XaM8r7XMQqX/qbYz1DmvfkKhgUYp2mQpqHX12hEOs0FdJ0/BLJR4R9AAQu
r2Cs0RaJIn3jrbj2RYdTTREn/RZ0qFKeRDgcPSlIuMMxtrgKMUb6hj/idjgycrIy
05ReSmpqai6JxXtOUiZipSRlZ6em91LK+qXlpJA4OGTkpGbAIT0TIXunJKXl5OYi
Kzzmpqm50sf09Iw0pbpcgSuNArJ9tGw7zMtnPnyivEB9hk/+103bTxSVVhheGLLo
cJRPRfqpVOSPoH5jSTyZQqXXRb5FSfqZSVvWQuq2nIZ9hJpnaUpvUf9nCO7XYUji
QD7IHTbfh1GIPnxCTiJvvGcRNhRiqMknbLiEgQznC54jtLAIN5awO/0o7xTCJCyG
sYu0eHivIbryEQy3cMMwuZywNDBMPqI9Y5h8ljBaMUy+RbR1d1ofwdY1oWsmndhf
1xRUW8glzVAAG6yXNHmTWqqZMSRwGU2apmOGkuBLmuLWngiIicsMws7opkUVRBkT
PWxJE65irnwDQ1udbNQlTQgdpOnVfuoJIfStvUQTXzYn5yXh9KClY06OnSC1Izj0
OblYasD29tw2nzzTRxteSJERtR9teLr6Rh3S5R8cfP/JWDi+6yRucQUWDrkGbtQx
mO9zbVNlPVIyTAKsi4133qqMAGniVMu4g4daBYzFQ7sOXTyE8tvBY7AqGUZBJKbP
d6wLxTOtXaGsR79wSm4esT/6WWhokiNhKIAN1iMhDBi3XTNyJGzaJtRIGGxzz+5I
yNbIGPSREK7XCz5cgKOfAY05EkIEI01xc08fCbmChsCtP14STg+EEKQppu3GkZCH
5SLSNxK+6nOGA1MBsCxgdQorOl4HW9FBFn+SBeozVq08YWzVCu7bHcwd4TeHpwSk
o1BTE8FWpBCehLHwc6hZEBa4KoYVJq+2woTn9fTZGAZfQjXuCUN+JZsd/iM5bEUL
xWF3pUMh1vEU8u/6BYNCrOMppG5+waAQ63gKsfYLBoVYx0skLxDMlggZPn3axOJK
DJxMfQrxOBzDSspKpk2fhlWDtMxuSkFx5aTisuqS0mJsnbCFfwz82YF+hTN5xGHF
NFC4w3FmdVGSMrB4RgkdfsvLEEh1GVRZWa7mqoZr5XAMLb+IkpGbicV/LGKMqqjw
e0c4truBxZFtzZx+fc7Ete6hplAeoPbz34GEz9Eg2PA3hhxN006lk50TqT1MFV/o
7S4ygb5Xaqsy82msRVrMFXRu9wx9888H6SEX2EgDkgCL+6AbDSqVsLkcTkacqLmj
XMO08BhgIGNgQ9RP0MIgTiVhKyDIbz5hJcCqCmjAM8T+CsJWXsBHPuHlmyacR1xE
I33QKm4gBIrowPm8v7RW9wnIzlO0iCrgDqlcQZhUViW0tq+A51XCc4GTPWOo3Ov0
X/fnYWo06Y5nJZw9o2Trw40HPrTwEUL4SCUgDPJaH4k9ACmt7aepEGu/YFCIdTyF
WPsFg0Ks4yWSWfTvdGqw4huGFd/07OxcyLCUpKzs1DT2hGVh9pSTmaa6pWLNWVsz
zqJPqmdqWkYWe0pJyc7IyMSGN/XPyMzgyWRkq5Gz05Ny2NI3OueVhyp7y29oUXSC
ORAXwUSnyFIz0clmv1FUNCVS04GabtQka4vROfS5PzVDNfF4Fn2eqIoxHPXHgrRR
dCI95AKbrx4mas8gBbo9uejEni2eUa5kwkQZxFiO5o73/tozDOb0/FsM4hVuEJ0T
tWfwolSLB3DRyYYHnUegA6ITcUKLTr+1An+pyQKvN5WaEwSpSQRJuUx49mpSE887
nYESzkpqqruiJnNiVVoLUtNjITVXSampwW6aCrH2CwaFWMdTiLVfMCjEOl4imUnY
t1d6JnFCtKSlpmhCJj03S3vC1hl7ykzL0WRadkYa981OU4URFVupGZpbSmpuegam
iNQ7PZ1HTk1T5Vt6alJuFhOa+Pq67BDlbrY6J4pLcIV3eZF/HHbEJVsrjKTpeKg5
ippjqUnSRKIuLtnMcwx9LtT8LjAVl0gPucDm4hI5cXGJoyZcXB6rPSMsejeeQ4lL
0IH8sFzFxWWh9gxxeYEWDwi2ChmhzSHZQqPVTzqocHrlkqIGsMF8SZHXEepbKnto
Hgb9SVxSTNfqEzb64bGoTFrbWFLka+wDqF9rxwBnkWOgk7vlhcEtL6zI4fUtxaOR
wODLUF3Wm+lU+yBbUsRuOWwEh2ESRY/VmMoecJgO4QPvvsGV24G+YE4nS1+UAjMR
oy+bsKG8AHxBEaSf1b059k2vw/bGnD5IIDskI7Iu2CAhIth2HNLlc1BOplmR4IbY
vPqCFokRZb5TFbxIeDYrEm9NHMatNrQAwIp0FLeJks4bcTMkHX0HaIako2MDzYp0
67lPJCUKn5D+m63B50CssEbnlgiwwXwOxOdBEMzLNGMcc6VpWsY4B8oXbHRr1Z3W
tqg7ACvkD9C/+0hfnxvCPUD/7lNPHDLwPsvWohnQXNgcCK6weSjekxECpjbbqjyO
3TkQFq2QZqB2ALhiQmH0ZYKQlwS+SBXSymoeI5YaqMM8BklwGcvBxFsgajOPQbpc
toMVgFmR4CbK9sAiIXT/wirfsRtGWSgBbywXxhM8m5XLWsAz+jnX6kZ/wLmhuhWA
x6xdAaxHqChKWi6xdUZIHbbk1f9aA2ywHsZgwDh+9f8aEig6pWk6xjiMiYAE6IEH
Wo9mp4OWGbqt0Y13bP4rktyNDWPq3TYhAS6H0c+A2gxjPE6QYczvdBC2sJFm4Pkf
8RcvYVDqyYR9hBgHKh4WU24Yi9tpiE7k1X+n/4AN7ijEv2obYt1fIXXzCwaFMK5w
2E1TIc3DLxgU0vzLLq/+t6i74PLqf4uqbv3rAgMyhnJa8/LqP2FfUAtJ07n6Dz8A
9QHDJ1eYD6D8KEctJ1eY8BDyXMDkSj0AIlz9V7Sr/5ij1hiO5YngcfkBbPWQSBi7
+o+i17jWq+ng2RvNnk9FRO3qPyZmOyPYxEyhZnMkCZrXWdSs0FQF4LmHdjBbnQRG
s8nhAGo87gL1GeWtiGATPNBWIK/+a2iqfnWFQqzTVEjT8Usk79G/bxPzbYHW5nfj
6bt6MDAnNzcTPr6L6HQEcjocw8vx1/9GfFZOSobSS8nKTsvCKJyenpaOE9o4J5Oi
3ofPScNJa/qelqZeh2fvvemImpGdm4LRHc8p6WlZ2SSavWRmZKlX4hEmKy0H1ApX
/g/PcpkPlygnUJ/hkm2PtqPDThcq2nv4jtNg0MJB9GgykOZ7KjUFJJ6Mo8PNNN/K
Ks5wesg8am6jeS2nw9JjNKWNxOyqP/JB7nyIg+TrQvThEmsWyBvvGC4RBvlg+R3u
MAOJftQI8hvPGCILiH7VfxxhQyKGyGmEpQEJi9OmsEHTPO0Z48FtWjwMi8u1eBgW
HyOMVnVYJCx/hyP4MSMXDZVBarGQKe/61wJgg/UaJm9T/K6/cc1MmqZlQq1hqu60
ts3WMGcapJ3RDU8wkC8caC5sDROuYq58y0JbjmzUNUxMupGm+V1/TO2NvmwSzkvC
SwYOYRI+iQSucIqlBmxvxZnd9UdiIENkRO2HG56uvimHdPkXBpgCGAuHoY6/802t
wMKBSnFTjsF8T2ubKt5Rub5h37qoqsTXjBEgR5xPGffpUJOAsUh8DTt4kdDiG+h+
v7FQPNPaFcp6yIum/7ykFkOevOBfR4AN1sMfX4HYrhmjuJWmaZlQwx+mw+ik9Rn+
jvW5iMMfXK8XfLjURj8DGnP4w1oX0jS/4N/dxJeJU14SXjLQB3EKMat2BIc+/PGw
XEbKC/4hoBDreAr5d/2CQSHW8RRSN79gUIh1PIVY+wWDQqzjyQv+h5Z+fdIEEQLh
g5pCeQA2FQqE9aR3IOGTNHaD8/C+4A/RDoBHMFxEdyGB2wSBIlqcxPvLaXlJlUMh
1vEU8u/6BYNCrOMppG5+waAQ63gKsfYLBoVYx9MvqeaksWuiqdnp2oX69Ex+tR4L
wdpNz4wcft0+J5P7ZqVrV0dT0zO0p5TUjNwUfk00gwfMTVfXpHPSknK1m/1X0Jwv
PUS5m3w2i8ISTEHHDyYsRVaaCUv2vXu43lFlwhIzXQA8guHCsiuxIyz9lgfsSUtI
swmEzWpVqRVCEQqe91pIywWCtEwRpKXZLFiVrlIRShAoxDqeQurmFwwKsY6nEGu/
YFCIdTxdEQqXVym5ORmZTNKkp2XnaJImjd+gz8zN1tSO5GbkasIpIytX803NzuGq
SFJzs9O4wEpJ1SKnMG8qsFLSmLicS7PGB+Uhyd5sSQ4dmgtM8AWCoiEEZoxBBwoT
irnUHkCNPtsMpQNFFJh8dplIdIEZTAcKF5g4zs8F5gDtGYbPQJEfZqBcYE7UngN1
oFgvPbppKHX3r7Cyd5b8LVx7ABvMVxF5FaG6cZ8fxrhqJU3TMph/iKuIOB/GbXTD
n/FCaxuriLz7fE3NIsfXZI/jG58bwi1y/EzdftFcmDiCOZ5oK3kznWqXZ6uIWJ+E
jRRgmEDRYzXmnf6ehIUPvJcPV4ghc180dggmc1+0+z6WvigjPqWNvmw+p67War6g
F6Xm17LULubQ53Pgpwjb23P6CILskIzI2GAjiIhgm3JIl09ROZlmRYIbr/SQRWJE
me9dBS8Sns2KxNsah3HzDe0DsCIdxW2ipKPxAs2QdPQsoBmSjm4PNEPSIZOAZkW6
9ZwuhhKFk1jiznGIuR0rq9G5JQJsMJ/b8fkdhhRMr2GMcwlpmpYxzu343QPY6NWb
8UJrW9RVgIX7B+jffaSdz01R3RTq1kVz0bss7hhwoLmwuR1cFSEU78gIAVObHWIe
x+7crjdhaZrrKsASktGXyUFeEvgiVXwYWs3AxFIDdZiBIQkuYjmYdAtEbWZgSJeL
drACMCsS3ETRHlgk5Br4EyiMvlBS3lg65Ixns9JZS3lWClQZULdSBJyEqlsBeMza
FcB6mIqlpOUQG6ee2NglFRbUGmCD9VgGA8ZxhQVzSKD8lKbpGONYJgICANNKdE6z
0053Gnqt0Y336xSfC3tnYxlcD5XCglTC0gw8z8RphS+TJ2z/B1Nr42jFw4a4U4fo
RCoscPqP2s3pTp1CGFc47KapkObhFwwKaf5llwoLmucN9rS63WCXCgtaVHXrHxcY
kDGU05qXCgsI+4BaSJqOwgLQDqA+xMkVJpl4RzlqObnCBIZOTwImV/i4nSAoLCCa
wgJMnCqcFX7hRSCMeiQnjB3JwZzWE84UFijULAsnvjS9bpbmqdQs0BQWnEVNjqaA
AGF2xvv/9pEIhBlPzd6w+b64M7WD5uoxn2j9eM4CN3vGOa5FEct8tFVIhQUamqpf
XaEQ6zQV0nT8EtUL5ZuJ6dZAK/N7/eJPEPXFbfuUVBzY8V2q70mB4+Rji6sQw/+G
f1paVlaqesU/Q726n52axX5HKSOV3ehPS8klcXDIzspSr/ynp7Mr/+mZ/HRleib/
haS0nLRMdrc/Iy07E+fhBZUFh2vJzIdMlBSoz5DJ/7ppm4miEgpDCkMWHYLyqRg/
lYr5EdRvLIknU6jEukgdyhguo63pJup2D43/MDVP0WFlEzFTWoB8kDtsvn+iEH3I
hGxE3njPIvrh+nzChkgYyG2+yDlCC4twY4mutGAKYVIVw+RFWhi8X0YYPTA3aW4Y
Gu8hLD0MjQ9rzxgan9JsDI2biHaMitZEsLXMOBoqndhfy5Q6C2oBsMF6GZM3Ka6z
QP4qc9M2oZYxVdFGa9tsGdPurzKjK3KgubBlTLiKufJNC21FslGXMTMIS9NcZwGm
sUZfNg/nJYEvEzRsHl6kvcODz8PFUgO2t+TMdBYgMZAhMqL2ow1PV9+cQ7r8IwNM
AYyF66m5idtagYVDroGbcwzme1vbVFmP6jMM/9bFRmDeqowAaeL0yrhrh1oFjMXD
N17o4qH1N5D+AmOheKa1K5T16BdPyc0j9kc/qb6gjgAbrEdCvh6xXTNyJGzaJtRI
GGxDz+5IiAk1B5oLGwnher3gwwU4+hnQmCNhNmFpmqsvwIEAoy+Tprwk8GVCh0lT
nPZUO4JDHwl5WC4ipfqCEFCIdTyF/Lt+waAQ63gKqZtfMCjEOp5CrP2CQSHW8aT6
gkNLvz5nggiB8EFNoTwAmwkFwnr+O5DwORpWFA539QUQ7QB4JIpoHMLDu7hpECii
A+fz/tKa/RSP/xo93CF9K4RruYpwFXe98DxBuJZLwgKv0MJ9mXAt1ytcy91pIt3V
tX7hWm6KxbXczfJarga7aSrE2i8YFGIdTyHWfsGgEOt4ier23QxqsNqrLv+mpGfy
i7Fp2ama+gCsCWt3W9MzVF0AKUm5udnaJdiMNK5mIDU3x/dr1+nZ6dr92lyumSAj
I1v1Tk3JScpgq97XEKaI9dDkb/kVLQpPsIcfYhYZyYFuLzLVTHiy+W8UFVytqIDq
SE13alK0FZw+1B5IzXBNmI6lz5M0v2nqkrRReCI95MKXkdExufADKeigXHh2155R
rhTtGYIM913wDOEJSvEMM5zot3OxPA03CM9J2jN4MU2LB3DhiZkvAB6JwhOiJbTw
9Fst8JebVuoMVJlYC+UvkGU7DQrkeZgKQW56BLm5ykJuThDkJrGQm8uk3NRgN02F
WPsFg0Ks4ynE2i8YFGIdL1Hdn8FaZ3o60yeQkZGpKQzIykjT5BI2zthTTnaaKoJS
sUkHwQPPFE0qpWZxkZaSlpOlCa3slFRtky0nNUf1TkvJSEr31/1yCDI3W50ThSV4
AiFRH2GJNPHXqPuFCZxs+pxPzWmasBxNnyeoeRIy1VRYIj3kAhvheG/kwjKY7hfk
CcGFmSEXlvnaM8xpRBeWozU3CMsJ2jOE5VQtHhBsFTJBm0Oyhcbgv83rlUuKGsAG
8yVFXkeob6nLoHmYocR/SXGYVp+w0Q9P1wQLlhQ1L5JDH/bRv4MduU7uhnD76N/B
jgLupMojmH5EW9ab6VTbBltSxBRGIUxSwDCJosdqTF0GJxEWPlDjAFzBE3Nf0Inv
YaMvm5DBAPBFnpBFVrfhwBMRtrfe9GEA2SEZkTlabQVAFM9AsA03pMvnmJxMsyLB
DbF5BQUtEiPKfC8qeJHwbFYk3l44jJtpqGPAinRxM62JkY4GCDRD0tE7gGZFuvUU
wUOJwoKZ/55k8KkCK6zRuSUCbDCfKvDpAqRbqWaMQ5M0TcsYpwpdBBvdWlWKQWtb
vBqP6f2F9O/LpJvPDeEupH9f9g2Yep/FoQAONBc2VYCrIoTiPRkhYGqz+8jj2J0q
5BOWpvnV+P4mvkwQ8pLAF6lCdllNBsRSA3WYDCAJLmM5mHgLRG0mA0iXy3awAjAr
EtxE2R5YJFAp/mIIoyyUgDeWC9+MeDYrl7WAZ/SjsoC60R9wvKZuBeAxa1cA6xEq
kZIGJUA2jtKwnwKRt+JrC7DBehiDAeP4rXissBtFpzRNxxiHMRGQAD3wQOvR7BDN
MkO3Nbrxjj3A58Le2TAG10N1Kx6rfUgz8JgMpxW+aMeJhG0jYDXeOFDxsNjrhbG4
uIXoRN6Kd/oP2OCOQvyrtiEWxxVSN79gUAjjCofdNBXSPPyCQSHNv+zyVnzzvCad
Xrdr0vJWfIuqbv3rAgMyhnJa8/JWPGFfUAtJ07kVP5AwoD7EyRUusqD8KEctJ1eY
8BDyXMDkSj1VIdyKV7Rb8Zij1hhOYYjgcfk5ZYRfFcZuxaPoNa71ajp49kaz51MR
UbsVj4nZzgg2MVMITq+RoHmdRc0K7RY9nnto55fVSWA0mxzi2eNmzyjv+RFsggfa
vPJWvIam6ldXKMQ6TYU0Hb9E8i79+xYx3xYI8XP3mdnZdn/uPj07PVvppaRnpqVj
FE7NytV+7j4zNSsNN8SzUtgN8czU3CzxPSUlPT09m//cfVpqRip/zsnMSeG/dp+b
ne33a/fbDs9imQ+WKCZQn8ESAw7+ukkXOjj18J05wZCF09rRVPxHUlkZSQpIPBlH
B5tpvnVV/AiJh8yj5jaa13JqHqUpvULM7sMjH+TOBzjIvS5EHyyxYoG88Y7BEmH4
gjzcYQYS/TwOpDeeMUAWEP0+/DjCBkQMkDhwiDQgX6drNmiapz1jNLhNi4dBcbn2
jEHxUcJoxaD4CmH5g8fBljFb0VAYFG0vY8oL8bUA2GC9gsnbFC7Dw/BVJGmapgm1
giluxInA7Mnurxhjos2B5sJWMOEq5so3LLTFyEZdwRxMWJrmF+JPMfFlU3BeEvii
lUNyYQo+kQSub4qlBmxvxJldiEdiIENkRO2HG56uviWnfgNp3xdgCmAsHI6Iwk3c
0gosHKgUt+QYzHe0tqnDAirXN+pbF5VLfLOighxxNmXcpUNNAsYi8WugwYuEFt9A
l+CNheKZ1q5Q1kNea0qul9RiyJO34OsIsMF6+OPrD9s1YxS30jQtE2r4C7aBZ3f4
E1cw0FzY8AfX6wUfLrXRz4DGHP4waUea5rfgcSze6MvEKS8JfNHKMVmHOMUkwTj8
8bBcRspb8CGgEOt4Cvl3/YJBIdbxFFI3v2BQiHU8hVj7BYNCrOPJW/CHln590oSO
B+GDmkJ5ADYVCoT1pHcg4ZO0lnALHrIJAI9EEY1jXaAVeVmLaFDHJ/H+clre4+RQ
iHU8hfy7fsGgEOt4CqmbXzAoxDqeQqz9gkEh1vH0e5xZKewqZVpGBv8x6HR2bZKt
A7OnrCx2I124SpmZmaVFSM3O0G5cpqSlZaawq5SZqamad1YKe8pKS0rLYevbNTTj
Sw5N5iYfzaKoBEsgToKJSpGRZqKSfe0ertc4mahEPAA8EkUl7taHFpV+iwONIyvx
vNMZKNfgXiPISkWQlestZGWFICs9FrJylZSVGuymqRBrv2BQiHU8hVj7BYNCrOMl
0g9T9q3FxVVqNv/F+/SsXO3aOfbINJGTnaVdSs9NT9HEUGZaNtfUkZOphUtJS6dR
VHmVkZ3L1XxkZ6oBM3OSstOYsMTXFjQhH4rczZbjRHEJrkBMNIa4ZCIxh9r9qRmq
icsx9LlQ87ugwcUlniG6crRniL3+2jMMljy4uISSRi4uC7VniMsLtHiA+bJjqxrm
Fs12/gore6eKP/Lah1K8UAsNRsdrtha/RQNs4CuIrVWtLj0jz4lJi4vxcB7NJGlq
h0UzY83Cqerc5Q30bnbyWHtHHJ23Zk2YQ/czxkFVcbcimnuaEHa9V3sQao/5tlEb
Gg95hLYZzBoGAxouhyjH0HA5WEdgYB2EYZl6/pl3AzFVgFPLIeZk5m+UokZ/kSIz
f5FKM3+RcjP/hepgipKAX2amrS8EyorygGbQBTfMN9oJt9w49uZZvccSl7po6VZT
b0P/OrUUVrSNPurn71/XQgZLYZXKthiNvnBKjRkNY71W7zyFMDWFSFoKF3lAFZwo
V2zQ1sqw6p3eew5cHshP+NUuJY66p2SMaQTCPFrD54wcD5NehNUlDxMKK4hCAlu8
EfbSFdtt6HQR+lGvfxlg28tLLHXovOynK/at0OkitLEMCG8vLzHl0HnZT1cc3kOn
i9BiGXg57OUlInRegL1069eWuLGXV9NsSzD267xptiUe1l5eIkLnBdhLt35tCWHt
13nTbEsIa7/Om1Jb6lZzFeHL6Tr25n22dvHM0Rn98/DG5h6s1Iz/KdpdPmCzGkaE
0yRfsd5EIHeOi9QSAvPUk/SWyOO+V2k5Xa3Z8zX7UfWkP+YA6uKMGViZUvJZgG4a
I4xk+k+HXFFnq7bOiDSBEcd6fY8aOCOMqZqhTozw+dpgBFqOGcwZYazBFssInFYV
sTfv9A7fPH3F8NPUZs+mxIFdY/GdwGsBXcNhiwUMdWJE43UNTgCHf4tYFV67FsEZ
YYcddWJE47UI4+dli2VEpPqmY6x3lIrVFl0jOCMaXUbUpmsYGcBhzghtfPShfi2i
0RnReC0Ca0giWiAj2quTQoBPqrqqT9okWV18YgVakH+Mb/VXh+jfRVuTJmwpV4NS
g2uJbpIU8a47Kf4rz4iI393u+A0etvTooVH2kiu1AnxMFhNWLaAVLrCRvtHsVcM3
NjjX+DsrocfPvQ2Z6Xf4zQjzyTAvhxkUL+OZi/Ls6wTGsxgP41mMh/EspQ48w4Jv
40PkDcBaDV/TZ5TgjZXem99TLUcbrd3xxVTYWghvY/HXSTq4bvb0j5mTmOd6xtM5
ZlziGNfbnsiYkxMprxwafyfUgr8Odee3kWHkb6pPfDAOiuAcENst92tDktUSrqft
AimsJ1BohnLiBhNwQg07E4Qxn3boGs2Z8hvde2BJVXUhbqL3yE8alXR8b6IQZMiI
YbsH0WRnEtgMMtzqVlaSRmI4KaLj8QUEV7S+IWXUPqFO1YyYLP1A6N2oLxU9Z0Ym
eyZQ0ZNMuxBED2znYdeN2h6SbnRH+GfuqyOu8awJD4uZFFHs2RLeIea0iGEQU3Xs
RndQQq6h8WF/RseYqyN0G+5rqHuxZofRAXpShG7DfQt1R/6wO1D30yJ0G+6B/GXd
6MqwunajjgdZN+pB/cy6EXYyHKSTXzeib+Tk0unllcVVk1SlDiVl1cVlVSXVs5p8
p3KSCa6j3PvdHWOudJ3k3u7+032Xa7R7vXunu+6VrmbQqDCvdKBulT5Hq/QbLSod
qTgwR6rRnCm/MWPSd62NNRxPUMOrsppCDU+N/yj27IQb4m+MPxCblVAS/2D8EXGd
E86gJKaFsRoO72G/htPCwnucTQeOj2gjhn0DTWdqvG7DPYu6H9DsEup2Y7xuw70z
dT8ijtmg48F43Ya7VQ1f765rDd+rjY4vEPPREduLDnxRrdecKb8xxx6bOrKkupRW
b3eCjNhHeGAHjlRJs65kVlWNV8nxJDLy64ThdGzE1BKmVeSvCf0jj6EccTprPzb6
NKk3KoyVzKoIWKoePuFEhCJG/P5DeksV1I8WKx92XfgeDIc338VZRzAE5ztiS76L
CMV3/sZtKwTnO2JLvosIxXe+tGpcYjUiON8RW/JdRCi+85VcblshON8RW/JdRCi+
84Vj4wKyEcH5jtiNxfdoyvfsmNFxj8Sz5cX58a0iB8ScGrcsPqIZfev3qFlAGJfx
1choVv+CJDJX/atjb95Vz6z+JrHLtjz+7qISiY3Bf5/6NFm27H71GTbeYVD2KFoL
M+lc06EupjpJvq/aXMI6g47jfa3hLpJKaUAN6i2hxq8UbN0hmFxEMEPVIpJV0xKT
QuMQwTPm9MM2K4AR/IAfQJnyDWUQp+ggnuEGg3eUS/OnZr2XGS/MehYFtjdffxZt
JOAkPbysQ7mirnfwL8+Jzrp0BZHVRhi7wotaV1isdYUnm2FXgKjGOqSxK1wY0BW+
yDgmqm3PrSZdYXXFFjJhwgT1GTbeYVD2yAboCvpg1EBdwWp0E5PqLTwDPOP6dAXK
lFcpg3xdAc9wg8E7yqX5N0BXmO3rCqvCG7srOLWusCOOdYV9cc2vK6D2I0y6Qm9t
eOXYmxd96f+O7NFnh0lXeCJiNdm6dav6DBvvMCh7RAN0Bb2FNlBXsIoiuht/h4ln
XJ+uQJmyljLI1xXwDDcYvKNcmn8DdIUsJ+8KV4Q1dlfom8C6QvsE1hVSEppfV0D5
w026wq88mIa9ecZrB3pX+GPY+6SmpkZ9ho13GJQ9vAG6AndpsK6gJ+gPMakuwjPA
M65PV6BMuZwyyNcV8Aw3GLyjXJp/A3SF/b6l+ecafYJUEMe6Qi9tVBjYDEcFtAws
RRu7wmcBo8KyU7fdtOqTL0y6wmvkNr9vBbzDoOxhDdAVWC5AA3UFPUF/NPa3AmWK
+n2geanPcIPBO8rVcN8KjjDeFWoafVToqU2QIrVvhc7N8FsBtGLbw9gVIgK6wtJX
2uf1TPzEpCvc6EJKOvAOg7I7G6Ar6KQ0UFcwlM0HMamzhGeAZ1yfrkCZIlKkPsON
u2vlaqCu0MU3QXq/0bqCk2TGnuWeFDckZmzsJe68uGNjLoy91X1cXGwMqkbrCl69
K4gwdgPNeMUwjQNjyeq7sS2u/bGNTtxOdKCt1fCwvdSWN7xfVm/1aIrqqdpY7GOb
nHxjExmhodZ/51pPNRCKt723pgbkz3dcoVLTE50OYdGu5xAlMpBTIqzcRSAID4dR
EpNGfENhSQHvsL/55hu/kbQ5hDkcYVVWO/xoamEkJCQaH9/XhBM2n/qBeMP00RLH
fkIODhISEn74gXjC9dkwwHuR1UhnZzSUYWQYGab5htHHVoy0fGy1Cm0nRRlGhmlp
YfReRC3Zi2QYGaYOYfReFE7kd56ERF2g9yLsOcleJCFRe+i9KJLIXiQhURfovQjX
CWQvkpCoPb731njn+k6B6Cr47/MpfWIr+ver2sNphws4PcTevfl6CHaASgc7QbPe
O8IVTb3PnlFY+hf1jkwiZOa4H+5854LW+W02Hff+tfPf6//PFS/92HX2z117jbv5
1TYPbJgY/vutpTeXrJm8pkPW3O7j3jxa+XzjxQkHwuasm9U6PHlc7IG4cWu/3TDg
rtd+vD55zVMff9pmRPH45d8//tfaWT/9vePZjA+/PXPLuGOv3L92+CnPD4h66M+/
lt6weuJn32677u4p8a9fkn/bwc5fJNx+hOv4fY98vd977c4DCRd2eiF5zo5jL9vc
9sinT342du67J13w/DPfvbY54sCfPe7cf/3KrSV3ZPce3PHguwXLF/Qgr60kG864
ss8b7aY9Mrrn75nvfF/W4eSnnvrq6dXvvvpF6sJbT1GWPbLvha82r/i6LHH8h8d8
3n5Y6ZHvH/F8Qqu+vZ958rx9myd+3OGxr1JueGn8EfvXvZL7/Y+rlajEo3fkHflJ
uw5XDco/UNP3m09bXT5uzXkvfnBJ/3N6ffRMhzH7U+7dWPHm40fsT31p6JzjT3h+
3JLZmVmrjr9n82vzZgy8puPM+HvuqNj45A/k0y8fOtvz9r5ucdszj7zv7qeSLz7j
P/siTxw25qVHs8YXPkRW/1WS1n7qR7tWRG04cuuZpSdtO/G/328Y9uvDncOf+r+r
n7r6qXZ3xP3f1d9urDnq9xffPK+fa/KonwoO/nhhxZ3jP7nonn6rFg374NHOK8e8
9di5yVu/bz3+rZjKsOef27Q645ylL8yIyjm9z4hLhr53S8/svx4/YUb7E6/vNDz8
if9sL/x+b8b8Tq/GD356ffx3lad9s/d154ycS68+fe91g2/a2O7LXTsui73r3p6t
rou9r2h2t2d/uuCF8urfZ6yfcsvGmy6L+fbM3h/smrdqe+Vln1168Lx7pzx4xrez
HrsszzVsXOL+eRP/Xrvm79GjZpQtHjI19ZX+E//36e8bz932xLHj3rzytYKNy4dN
/OWt5cP2vTA+r/iZ6Cvf++j+d89/c2Lr+W9t6v5/OU8PGfpi7tOvrdm4LuHOac7l
T2cdecPJT20Pn/jrE9f0jJ/W6pby+Gm/rPzfD4MmL/H2eHTYVf/Z1Svriu2XlN57
7YAlr3y5ZMCSS7qXb73qYTXmX+UnLVnx+ebuqX/t3tz98RtferusteuB1dGO24pX
Rb+ye1LrUefOGbZ36cVTl5zye/+pBxxr17648uzisqJW2q9cOGgXwo8Dib+jK3/t
wh68YAN4BLBfu0iOPC/m9Og4j0PlURj5kqSRKoKjog4SG471H/zaRRhhvxlg9msX
N2hH/ngIH2pKvczd3w9xWF7MHVXF3YL/2oWYkv5rFzBHqMftnH6nD0XJu0z98Wk0
HxjjGUWeO4dRZhv9F6rH+VhjZKatzwWAi9kvM3D4ftPBq78rKBxppcY9mrbkmDr+
OkRrNQWFxJF4Uxqsfx2C6/uMUlNIoHWcSPRfYggGI3+MQJiG+02HhqNJ/joEQ+i8
7KcLzaAcodNFaGMZEN5eXmLKofOyny6o4QidLkIbf5UAsJeXiNB5AfbSrV9b4sZe
Xk2zLcHYr/Om2ZZ4WHt5iQidF2Av3fq1JYS1X+dNsy0hrP06b0ptiWl1Plpz02ce
F7d5bPCu2UV5NTQJNvcIVIHPwOPotvjrEMEoAJA7B9PqjPv5x6mtJJeMcbjIAVpi
9r7AMcYRrb6H0PocQg+4ty5anxmjxKYO6NMjxqiz1WedUY2p/hqMCsEIn2+DM0Ls
L0CLZYSivulosb8eoeqSFFA/zfDN+EcTsKAgosUyQtBor6LF/noEu8uno34totEZ
0XgtIlF909ECGcF+PQIkc4HZWL8ekR+xxV0V3b1VccQf7tOjna3YUl4rGkX+eoQ/
9Dv9l0bmxjwclepZTnk1LyrOc03koJilUd08ze9OPyhwEbZQG8Uod0DrNg+lI/3W
Xte+kbzdN32PDY/QSmoGaHqJpq3LSb4kVeqd/tEOdZrvd6df+2IQYHan3wdnjV8p
kHvoO/1qJnqVIpIV2UjKWPlstVhnH1Z10bms7vQbw3No3rCNz6q2Fy2K4L7eS9j9
fdjr0ZGZHXinX89Tv9MP6HfV69IVDJT7Qe8KW6PKY0l0qufPqFtiP3HFeXZGXRz7
m6s5dgVMoaIDukL2AV80H/hq+iUPPTdh/IavDV1BPAkL9NiUpnYF7IrUtyv4WmdD
dYXAbBn+ja6wzKDpBTZllq8rcLfm0RVcpDpiTwJG0kURcR42ksLGSNp8uoK9H0M5
WpuN8Najt6vG/DEUR9QniZe53mzVLYq0Otu1olW/qPat+rsWtKJjUx1+NSE9LLyH
lkUjwsjf+qoPcTtZmz7gMP/VBGz9OXDEcT2P2Us98HiW9qMJCkE+jIbAH02w/rmE
+mgWQcxQP5fgUuehZ0WmejAPzaA9B/NQ2IffTwkph6T33BG+y311xHWeNeERMZMi
pni2hHeKOS3idEgnh8bfCbXgr/ZTQtd52E8J7XKznxDiNtzxE0JTNDsihv2EELfh
jp8QQv6wO8WwnxDiNtwD+dvYPyWEbe/D6qeELoxMSoyLTml1W+SIxD2u2FaPRk5N
fNf1m/gzbILGJRuV7lUzaFSYVzpQt0q/PZJVutVPCUHRpfwpIWYOz58SwlmUZv1T
QjGRexLOpGMjZpQw7SJ/Txgc2Y1ypPn+5AGAmQlg9RUC+L6SCEvT/ycP8KcufA+G
w5vvrEUzu+58R+zG4nsY+SlysftGV2Js66gX3VNdP8ScEPW+e4RrWwy6cSDfRRh5
zk3jA4vWlcK7cVUWVIirsttrFOLjpy+E2k6IXjMfqvIGLq2pxDoKa94BPlMpE34w
9XmRxnlRWBjeXicZFYyH+kC0K+Lt6LuiP3BHRP4SPTP6KXenSLd7QvQSN+IGTjVE
GOtKM95dVCC/TafPd0Xr9gc0PbjDjqDN+BfqNjNat5/S3GF3orab2hOidRv0wB02
w/X8gdR+qsGZZKbckQ1EHGwgSiQ4eNrab6qBU8gFMwpLpxcr/ZTspJTslOLeKWlZ
vUkaQTNgDSFQ9SPb8IvShA06NNtCMBugajsL4UAOiIkc8RkDUgGEOXCQtPVXC4kQ
PanpT02pVA5pL8zhCKuy2uFHUwsjISHR+JDKISUkGg5SOaQMI8PIMP5hpHJIGUaG
qW8YqRxShpFh6htGKoeUkKgvpHJICYn6QiqHlJCoL6RySAmJ+uLfVQ5Z6WTKISdS
WzlKVQ656K3hH3s9m+4YMXuFd+Dn98157+JRv2+NuXljt6Pj+l87aGDP1f0GDX9y
fasvbnh/ZdaeB5I3X71zc/aeKzoM3jGn6qbCrAvWzF13Yc2Ksh43tvlwzY7P3vz+
8slZo79PvnGN13V8aasRe97b0OqTn7ZddN2lu7Ov658z191r1a6/Yzv3eqf1iN8+
zH5uQdfFL434YvvatBeGPf3ubZvPn9t57O33X/rh7qR2y/fkztx/6/UnDVgye+nr
XX7dOv3kYRuH7nYu2NTTWzHqwfcLz1h37qNZF83bcuIzj4z+47/ftX807uoBrUb0
rKmZuPSoX89/8usZ80fvu+aF7mEn7FzXbfcZNStfv+2NrwZ3v+m7u2a9t/mzvNgX
t+7/eMK4Dzf9et2GtZXt2xVP7bzxxdh3Ovx0wt+Ptv7o9tdWXXDBR9f3WVOx+LM3
92S81PWK17sl9RmZ8eX6BxYsf3f9oq6tunfceYPnsbQP4jYPeC5zTs6z50Su+vqU
IfOyF15aMuGfDSXXLfn0qC9GfdVmWdInD869qvvYO985u1/sjgHr5r91bj9yz392
bpmybcKwj/fMO+G2G1+a0/P6GfcfMXb0a4nddnywePjTnZcmLR7WLm/soMVTqxKy
upavXrp6SY+2c276vV3+fcfsTqhe2fel5167/4H2k1JTp89YveirIaVD37z19T+n
jb9s0w8Lnx3Sd8faYQfGLblr6T9rT18yodeSrFmXHiibuKTo4DnXb4ja1j19+Y6M
8rTte74YmTD3olHJj69bu+/VQbesvGNldmTGiosWPj+7/dqVsw/+9knYKjI37MDv
YbckPZqa9/Ocj447+623Nuc/tz2q99IZz5b8VvPdawP/L2/pm0Vtznn9nFF37zrY
7z8f3lPT/pKCI++O/v3Bv/5ZFP37xNUz4x6Y9kJ7UQujk7ZVjBMjCssuqFIqSsur
+yjDCsvKeo85v6S6rHiWUl1cVQ31jLbVNCJVO+eJWgC8YAN4BDA1jew3yGM8TpVH
+On5NGoYoKYxjvipaVQC1TQu0A61Bahp1ABpE0xNo+hmX03jjzUDHWydCC6oY7XF
aMFbKjjneJ1YAbzj+In0deinS7kHHxvEMaIlAzyywl5cg/FxUCI4OCf1dgcHzl5j
+2vpENsdk5E/Xc5tvd0FaZwSGgLbnWxj1rAn7yQHQ4NzMkLBMXydrfrcJlwZSRqH
lz96dXXWqC+uzhrzNz7nwi0V/uyvzloMZQYxphl0ddYcbX3frrVVIe1S7zLEqyU5
gsZuX+sUmNqwBDWFIykfOtQxBY+aQkfSiXQmDacyuimmJNVYM4TOy366wqUsG+ki
tLEMCG8vLzHl0HnZTxfUcIROF6GN6pMBe3mJCJ0XYC/d+rUlbuzl1TTbEoz9Om+a
bYmHtZeXiNB5AfbSrV9bQlj7dd402xLC2q/zptSWmHrJIwx+Y70dN11I/z+SV0P4
3CNQFy/DsV7fowZRjXUoIHcO20qJQygcddVFvSRjRDv1TYegnZmAEWerzzojGlPP
pg1G+HwbnBHGa7EtlhFHqm86QuniDd41mpSaaiMDOMwZgS8nEfVTQduMtTN3UN90
tFhGYC9VRKiuEZwR9ZMRQAhGNF7XgEIsEfVrEY3OiMZrEdB7IaIFMoKpqUZ0bdak
Kc7QJskNqKb6u/B33TfGn5mYEPG7e2p8ciK2MrPjPJ5mqqbaR2Hjqal2kY4RXyeM
jjsz0RsR40mLA89gg2fNTaWif8k5hYR41zOVikdo7Y5vy+nbJI2nUtGltskzI5M9
aJPJlLdok7Cbn8rKUPw98hDw10lec8W473DHxfzgSnZXufe4I6IHu89xv0uFhk97
YS1026U4SA+WQ2PCyN/aqhTiflyl0BxNZaWV9sI4gjlVBPtSUdFLFeHqAYm6Ky5s
bJ12TlIZ3SnxJ3dcq9uj8xPfcO9JfCx6bOJT7ncTdcWFtanctLDmWLmnOljl9nKY
Ky7EDgiUOzlreMzmoc3XSa4Lr469OOLnuMfDF8WOiXgrblP4qti8iNVxda/d6ygh
P9P4sKtpUS+O0G24P07d39LsRdR9TIRuw30TdUf+sFdR97wI3Ya7Ve1eGVbX2j1C
67ofHTDvutidMqvdsU2+dqXS0dBKR7FzGFTpqELqVr2NJ5pFbW4Y4XvipweQhNTj
FirM4QirstrhR1MLIyEh0fiQetwkJBoOUo+bDCPDyDD+YaQeNxlGhqlvGKnHTYaR
YeobRupxk5CoL6QeNwmJ+kLqcZOQqC+kHjcJifri39XjVu1getyKqN0qTtXjdvun
p/4npc2md3Z/PS8tP3HgpY7x3h47Rl5w9YQnNsckD14z+ZxzSwcfVfT7rkvu6zeg
39g81wVtvp3nerBg+C37/sjb83jMmxfHfBhPfktw3JX72hPr5+Y9fUdGhw/vuvr5
uQkzZ/74+Q0bjqhZ+u5FvSac8OsJuTsW3bH8g4KrOn+w3HHn2bcrp6UOH/v6d990
3rHjqt/PmHnsNUujhxX9c98ZHRaeTPaPcYy67YyH/lxw+dcv3NcloV36G9fu3nLs
+w+2HeTI7Nau4IyMy+6PLvnp+Q493tpXPC35+1Muffb9tU+ub/3htQ98fue1d97z
3sDz9/2Rv+20yBXfk00b1v3aZt2CJ86fdPTf3Z45LnXQr6Me33rJ8ee88ezaYbOG
zlQqT968efayUeGrK658Z+r2B64f9U148mrlhWnrY+Kec81T+v517bQX33j+qrd+
+aDHtme3PTbmsrfdxTP/6rfir4UHXuzXdv8V667K3Hf9usf2bf30g213f7R1e/q+
6/tNenzuuv/dNHxUnqNP1HuniprMwmht4QgPU1A2qLCydJaFhrJ4zeZ12JIBNoBH
gL+GsjCNR7qGMnZEqg2BhjL2DvhrKDvPJfKW75iZQfdDeDEOqoq7BddQxsB8dc0b
+H47Qv3xznC/C5biYS3xCs1xwvMyMp+wHg4qjNczOVUcxuNfRn/jRR2jv5izmf9C
9fAZKOHSipu2Ph+UGnIKrRq3Nsy0bOzNs3qP1W7bHqWm2pN0JcdoKfRd/EufQWvu
0kIGS4HdvOqgpnAC6Ua6m9JgremDp9BOTeE40oMcT3StGrFBWxGTyqve6b3nwOWB
/IO//ZRE1D0lY0wjEEZq+mAInZf9dHHLiyN0ughtLAPC28tLTDl0XvbTBTUcodNF
aKOGCcBeXiJC5wXYS7d+bYkbe3k1zbYEY7/Om2Zb4mHt5SUidF6AvXTr15YQ1n6d
N822hLD267wptSV2Q7enwW9v3mdrF88cndE/D2/BNX1sVsOIqJ+mDyDEDd3a3NnW
QgbAeEOXMcKYrf906N9VcAGEYITP1wYj0HLMYM6IY9Q3HS2WEYgmYm/e6R2+efqK
4aepzT5QnQHrGovvBF4L6BpNStOHFjIA5ozoJoQA6neLvxkruOiuvulosYwwfhe3
WE0fxhu19WsRjc6IxmsRx6tvOlogI5imDyx3cC0djaXpIyniXXdS/FeeERG/u93x
G1StCkxrRbPU9OFzb0xNH0kRXycwnsV4GM+aq6YPfRMElOCNld6bzzRRYJEQ7Q4t
EYCthajTjVg7/HWSDq67Pf1jbkzMc73s6RwzNXGM6yNPZMyIREETxYRa8NdBJqgZ
NCqM/K2vsoI3tQvP64n5hWcs4jrQoWs0Z8pvdO+BJVXVhWWTipUe+Umjko6v+8Xn
xr7X7iJ9I5hClwnNXqFLqG50wiHpRneEf+a+OuIaz5rwsJhJEcWeLeEdYk6LGAYx
VcdudAcl5BoaH/ZndIy5OkK34b6GuhdrdhgdoCdF6Dbct1B35A+7A3U/LUK34R7I
3/pqheioaYXocdBcKwR2MhzYIarhMXup+0Unl04vryyumlSMrlRSVl1cVlVSPavJ
dyonOdV1lLtVTMeYMtdJ7h/df7qvco12v+/e6RYqvRbKIg5PLT5t1EqP8VMWgemk
sJ1srOJ4YleXT+NXsdQHElofCPYXg+oD6U6QESblZj04UiXNupIbTysIq+R4Ehn5
dcJwOjhibgnTKvLXhP6Rx1COOJ21HxydLEIjw1jJrIqApSSHMErbanYwiP5Ib6mC
+tGKkA/fuvA9GA5vvmNCAr4bjzwZEZzviN1YfHeS9NgCd2GcN2ZMbLW7X1zHmPLY
693d4sIhlvlk0KvzXYSR51rP8voCNBqMfK/vuCXWHBNjPQjEGJ391PCwvdTJ4/B+
Gb3Vmafqqdq6CONiS51QUf/6j0t6qoE4vLsOHcDUrgM7GIJ3HcSuC9+D4fDmOz5l
wXdhxcoUwfmO2I3F92jK9+yY0XG3J7Als8qEVpEDYk6NuzYhohl9v/aoWUAYl48j
7Lc+2V+VJHInD6Zhb974zHlX7jhjQx5/j6VTKCaB/nnwJ/WGIgAb7zAoewSthZl0
+uRQFwidbAxX4TIdlI73tYa7SKqDnebTW0KNXynYtzSbyJkDwQxVi0hWUeDOP9Q/
Fz2Izj5OP2yzAogQD60BlCkHKYM4Reoz3GDwjnJp/gfZIUgYL8x6FgW2N19/Fm0k
4CQ9vKxDuaIud/JRaZWzLl1BZLURxq7QTls9/lXrCjGe5tcVIKo7mXQFI+f25hkP
Tepd4fWEC9ULuwBsvMOg7OEN0BX0waiBuoLpwE4avytQpvxIGeTrCniGGwzeUS7N
vwG6wrsO3hUGNXpXmKyNCv21rnB2MxwVUJvtTbrCazyYhr15p3WJbT1z2qsmXeE1
cpvfPXa8w6Ds+EXs+nYFPVwDdQXe3I0Qu8I/ogdpmK5AmXKQMsjXFfAMNxi8o1ya
fwN0hRd9XWFGo3eFIq0reLWucFYz7AqgD0tKxq7wBg+mYW/eNXu+/uW6Z826wo0u
pKQD7zBI29kAXcEXpaG6AqugQIhdoUj0IA3TFShTRIrUZ7hxd61cDdQVlvm6wuxG
6Aqikl+sP+KMZH+p6NdumMMRVmW1w4+mFkZCQqLxIRX9Skg0HKSiXxlGhpFh/MNI
Rb8yjAxT3zBS0a8MI8PUN4xU9CshUV9IRb8SEvWFVPQrIVFfSEW/EhL1xb+r6Hed
kyn6fZTa1ceoin4XvVG2xdvmquPaePoPenhk0uc9j50xv9/NG7uXnDJv6/z5imPl
f6956AfPF9FfJB77yC/h8+P+TvIkv+w+4pFfjlrfelnKLU9cfebFd/XJT2tz+gOv
P/vX27m/3vPr4GvOefzcg236/3fNvIJJNZu+fuWvuftmTBv4ctkNqRd94ok5+/OD
T88sOG/AiiNuzv68ZurOA9mzlj6XPHfHoJ7fTO749Nw/Ol79ReJPZ97zZE71oL4n
XbP78qeOiF/7alL0lz8fHXebqyTCW9xW6fN6QbuN9+4b/dSHn07+seKzC2fPXbc+
/eQlb03u8WCRI3HQ2k6tdj799Y9dHvg+etbQds84/rj9hQR33+Qz/7o1r8slLw0b
sj7uwLjHV5ybFvn9j0tXRB559I7xN/34xpVDzrixX8LTK6/9eunfN1y97uvn3tny
5Kdrl79cWrO38s2yMVsXnTf4jDu+u3XWoul/bt80sf/udq8m5v+8PvrPytjsa34a
/M1jOZlzKp557Mj1y9/Inbxh4fejwjrcOP63FbmPPjEu9+3Eb6/bsnHZhvs3roza
0HbrltLcbX/f8uHcIW883Dn8jlHvvH330nWPTH1k9uh1sZuX7fjg5W1zdz757T/b
3unneP2ni2/65rtNV/498+or135cefXPsx/e7To+8/FXoj/fuHzzez8kvPBqbMXd
Q+/ff+fE7tOn/TxmzMe7Ws3Yfplz94+r8vt9d9Mn33Y68/Lt8Qd/6rTj3Kc6vf3Z
rqc+/3xP+l9TUz78+PSFZ/5245ddNz285pHhg0/dcsx93/1x77Xn9brsf//ccu//
Mjwddt358V9//Xz18Jm7Uq498r7dl3gWv9Txn7jifbP6LJ26+73CyWdc1+V2z5nT
x1zzfPHEM55ZFNN9QPnbHx17345WH3152u9f/fHANOfytVl3Du2+cnv4xI3bB/o8
02c/3nr3M9FX/vLRlzt3/qdn1hVnpWa9u+SprNdWPHtl1qyLd3/6S9YVBeOWKKue
6lbqfGJi6b3Zdzw95PP/tXuh+qbZosbkcNrscSVpQHnFLKV8siI1J9cCXrABPAJ0
zcmnRsd4wlUehZEvSRqpUo8GsptYHQk0J4fRfyyav+ZkxLlBOyLHQ/hQU+pl7v5+
iMPyYu6oKu4WXHOymJKuORlT+SPUO2RO0kELDkAociwjpxAmGmHEUADPnUOMaea/
UOUMUuJiuq3PBcIbd/3MtAlz+PQQe/V3BYUjippaJulNkrQUwm5+91JPxvN5u+f8
99w/i3/kMTUEajTuoqaQRes21ZQGa43GXEfV0WoKaSSdTu107cHBYOSPEQgj6iG2
hjGmEQjTcDRJjcYMofOyn656z1VD6HQR2lgGhLeXl5hy6Lzspyu20NDpIrRRky5g
Ly8RofMC7KVbv7bEjb28mmZbgrFf502zLfGw9vISETovwF669WtLCGu/zptmW0JY
+3XelNoS00SYqbnpM4+L2zw2eNfsojwkweYegWpbGXgc3RY1GgejAEDuHEwTYW+C
O7poJblkjKMDOXAQvymB9wWOMY6O6nsITYUhdFd666KpkDEKxInQp0c1KqPOVp91
RjWmykbQEoIRPt8GZwR709FiGZGlvulosRqPjdfW6qfNtBkr+k1V33S0WEbg14pE
tFiNx+nqm476tYhGZ0TjtQiuu4yjBTKCaTwGAaq+ONK4Go9PdjONx13dTOPxqdFS
43Eg9JvcMyNzY++PSvbcFXlebE1UjOfKyEGxi6KOaYb6PdyUAij9xEJtFKPcAU2R
vmg+dGo9Ymj7Xq/mzZ7ufi1D2ZMXG85vcpvhj2HvUz65aYpfkir1JvdohzrN97vJ
HRjf7Ca3r2U7a/xKgdihb3JrwTjwxiooEEiKZ8/BVot19mG7DARZ3eQ2hufQvGEb
nw9SZl2uRRHc13uJemvbC3s9OjKzA29y63nqN7kBXQFbXbqCgXI/6F3hnajqmL9d
yZ5foxbFfOCK8XwcVRPzk6s5doUYSkHHgK6QfcAXzQfjarp/VxCPrwI9NqWpXQG7
IvXtChjzVDRUVwjMluHf6ArLDPo9YFNm+boCd2seXYHpwWcjaYyHjaQxHjaSNp+u
YE+Bd6Y2G+GtR29XjanAe3/k3Z5ZrhsTlaiXPaNcUxNzoj7y9HNBD356HRT9poeF
99CyaEQY+VtfnZih9OArBF+CkSyAil7q1uZZmp5fhSAfRkOgnt9Dp+G3Jam/zzok
vUeqvw+t/h7b3oeV+vvRVGR2jl6WODvyZc//XJck3hz5kedzV5H40yGCGmEble5V
M2hUmFc6ULdKj4wMrv4ecz5V/X0NjynV3x9m6u9xGEWqv/eZpqHTGJ8OR2q21WcI
4PtMIixNf53GiF0XvgfD4c13yDbwHXbd+Y7YjcX3MPJt5Jfu+a61MfFRrpgi16KY
7lFKzFBXTQztxt5Avou9x8hz1XiFAI2G46mpFN6Ny7KgRFyW3V6jEMZPTr+vnRC9
Zj5U5Q1c4qnEWuRbABB9iigTTjP1eZ7GiRJ8ttdJRnG6zKAPRJ9GtHPfHq3EOCJP
dFdG73cfGXmm++zoL92IGzjXEBFQX8x4P6UCuR2Nf3u0biu0NHCH7aBfNidS98po
3d6P/CKZfSS1z6T22dG6DXrgDpvldL1OSK3nGpxJZj9ZwAYiDjYQHU9w8rSN31wD
+RTMKCydXqz0U1KScnJzM5UeZVV0XomdMZyZBQJ/0YBt+UVp0gYfeWwTwWyEqu00
BOA1gZjIER8yfP8AYQ4cJG39NToiRE+ianQkpVKno70whyOsymqHH00tjISEROND
6nSUkGg4SJ2OMowMI8P4h5E6HWUYGaa+YaRORxlGhqlvGKnTUUKivpA6HSUk6gup
01FCor6QOh0lJOqLf1enY6WT6XScSG3lKKbT8a3hH3s9m+4YMXuFd+Dn98157+JR
v2+NuXljt6Pj+l87aGDP1f0GDX9yfasvbnh/ZdaeB5I3X71zc/aeKzoM3jGn6qbC
rAvWzF13Yc2Ksh43tvlwzY7P3vz+8slZo79PvnGN13V8aasRe97b0OqTn7ZddN2l
u7Ov658z191r1a6/Yzv3eqf1iN8+zH5uQdfFL434YvvatBeGPf3ubZvPn9t57O33
X/rh7qR2y/fkztx/6/UnDVgye+nrXX7dOv3kYRuH7nYu2NTTWzHqwfcLz1h37qNZ
F83bcuIzj4z+47/ftX807uoBrUb0rKmZuPSoX89/8usZ80fvu+aF7mEn7FzXbfcZ
NStfv+2NrwZ3v+m7u2a9t/mzvNgXt+7/eMK4Dzf9et2GtZXt2xVP7bzxxdh3Ovx0
wt+Ptv7o9tdWXXDBR9f3WVOx+LM392S81PWK17sl9RmZ8eX6BxYsf3f9oq6tunfc
eYPnsbQP4jYPeC5zTs6z50Su+vqUIfOyF15aMuGfDSXXLfn0qC9GfdVmWdInD869
qvvYO985u1/sjgHr5r91bj9yz392bpmybcKwj/fMO+G2G1+a0/P6GfcfMXb0a4nd
dnywePjTnZcmLR7WLm/soMVTqxKyupavXrp6SY+2c276vV3+fcfsTqhe2fel5167
/4H2k1JTp89YveirIaVD37z19T+njb9s0w8Lnx3Sd8faYQfGLblr6T9rT18yodeS
rFmXHiibuKTo4DnXb4ja1j19+Y6M8rTte74YmTD3olHJj69bu+/VQbesvGNldmTG
iosWPj+7/dqVsw/+9knYKjI37MDvYbckPZqa9/Ocj447+623Nuc/tz2q99IZz5b8
VvPdawP/L2/pm0Vtznn9nFF37zrY7z8f3lPT/pKCI++O/v3Bv/5ZFP37xNUz4x6Y
9kJ7URFjBG2rUCszorDsgiqlorS8uo8yrLCsrPeY80uqy4pnKdXFVdXQ0Cg1NdYB
XrABPAL8NTVGqDwSNTUyXT9dSShNjQu0Y23/rqbGH2sGOthCEVxArdpktOAtFZxz
vE6sAN5x/ET6OvTzpdyDDw7iINGSAR5ZYS9uwvg4KBEcnJN6u4MDZ6+x/bV0iO2O
ycifLue23u6CNE4JDYHtTrYxa9iTd5KDocE5GaHgHL7OVn1uE66MJI3Dyx+9ukZr
2FyjdVeiz7mOEZ79NVqLocwgxjSDrtGaQ9doDRt3/8y0SXNYa7Q+Ri1RNskhuX4p
aDFqirw+JxUlwjvTIHasmkIfciKNbUZDaI3W3dQU+pGTSB5pOO3RTTElqdGaIXRe
9tMVLmHZSBehjWVAeHt5iSmHzst+uqCGI3S6CG3UpAzYy0tE6LwAe+nWry1xYy+v
ptmWYOzXedNsSzysvbxEhM4LsJdu/doSwtqv86bZlhDWfp03pbbENE1ma25NT6N1
V4NG62MOrUZrXBwX0WIVOeeqbzpaLCP6qG86SjS1vRvV7hCotlfsOkO8vkcNzVij
9YlCCKB+2mqbsSJn40dVi2VEP/VNR4vVaH2S+qajfi2i0RnReC2CTy84WiAjmEZr
REExgcbSaH2MptF6sNRoTfRymEFX4zszsoum0XqQptG6dzPVaB1LKehKmBpfbRru
MNdozeDyqpZS5HWRYBqtgYbSaK1/sNT4lYJt7QRbwhOCcQRbl0dSxuTYrrrOPhwW
QudCOYwHiQBjeA7NG7bx2We0YNr7ei9p8mp8odE6IZZptE6PZRqtO8Q2T43WcZQC
rJz7dwUzjdYM+mq6f1cQL+9wNJRGa/7zBg3WFQKzZfg3usIyE43W3CCY7tYcusLh
pNFafwclnELwl+nkzdZmI7z16O2q8XTyutSZCnQeY6bSvHUeh+Jvn0PAXyfZEnmU
e7mrY8wfkSe5L3X96U6IGu0udu2kXdyn/rYWulFTHKQHy6ExYeRvbVXScT+ukm6O
pvPYSv0t5kqqoK3hMXupclI9Xld3xbeNrRMV6uBXeWa5liUqUVs9o1yXJOZEfe/p
p+o25opva1O5aWHNsXJ3aPoG1xNzxbcY/VXdgDWaM2kYdfC11SdY+9p9NXxf7DMR
VfHfhh8Vd3PE6fHOiLS42RHZ8XWv3VcpIVU0Pux9tKjPROg23L+l7qdr9lF0WnJz
hG7D3Ult5A87jbrPFmy4W9XulWF1rd2hWtf1HDTvujjTYFa7Y5t87Uql1aGVVuO8
iVRa7TNNQ3kyuNxFs62+NADflxBhaforT8ZzXfgeDIc339EDwXfYdec7Yjc830UV
uBC/PQlU4Er9t/bCHI6wKqsdfjS1MBISEo0Pqf9WQqLhIPXfyjAyjAzjH0bqv5Vh
ZJj6hpH6b2UYGaa+YaT+WwmJ+kLqv5WQqC+k/lsJifpC6r+VkKgv/l39t3lOpv82
mdpF7Zj+2/OGd0j1bBp2xUneRFeP+e+NW9bOe/bPN3vm9OzWtespmx86/5b2KWPf
X/jBnPsf2nXFkt86XZj4tmfy579PnDGs1ZzF/b87ZWHe+y8d+Xde58dXf3Va3qJu
V3Z8rPWI89/90bn18pH7Kjsdsa2y/5+fOmN7/OfgMX3Puqv7se2eGF+w4K53L7/p
h5F5R33a9fVvrs06+4GH7j6uZHDWzPXzsvpF3DTllIMfnLBl1dicwi63l28d+fr9
rWv2P+58pdvis+fm37Z04hPPHLd/351fbzvnocItUx/94LvEYbvCJ16beVqv+z+8
6+Pup36YcNbk454peqz3lvKhFW3Pizi3c+qs0bt63Xr7/qSxlxQefOi5o+M+vrf8
0rI/x1154NuywpcuG94h7bt9ZWN3/XrVObFb/ji+7YPlOdNHHv/OoFuu/b/vI9u0
+TH7kVatO6XUZGecW5Tvue+4gtVzJpe+ePb6Z5K7td1VMGPLyyd/el2fZ9esfrvd
swOujyzoFHt21l+v/3b/tvQNqVtP237NyqidHTNuvHzinK2vX3bOTQM7Xb5pTcrY
xPhf1q5N/mXtfRmdpvbL7dTmxLP2f580YuTcq1d5ct+rPClv0MOe/WMvj96a17Xz
8oWfrz1w65FtJrY+7ZqH7135yidHvvrgKx2Lp3zz1H8fuOa01lt2HT3slu++W3Lh
e6+8smP44qEHziud81PPYXfN/mncug8+CRv20PB+D9195jsPZ989+9nWY94JH/9/
O8ZfegF5LvyGsMum/7fIe1qv188tOHHgw38NOnHz3GM2v1f+9NTRCbsve3Lhn+/+
d3j3qg4VKysTDxx3zF1T88jAN3dniMpsI2nDw+VG6KjNUoYWVhcTqaI2BLxgA3gE
6Cpq0+JiPJEaj2aSNGoAdsoRNwqKtHfAX0XteS6Rt3zvzwy6H8KLcVBV3C24iloG
5qurXoOcOkK9/RyhngbjSBaeRUUSfYRnUZ3AMrKCMLmFb1sxJYBTyCGmbuZvVF1h
9BepMPM3Kjow+i9UT9aBUi6jRdPW54vDra0J+AVXcMpcLZxPKUvAeyxxqdeL+6gp
jyf5pL+Wwlc1H7b5X/d7tZDBUmDX8E9UU5hABpJBpjRYq4XjKfRWUziZDCanEF0F
G26hBgO+sla903vPgcsD+Qh/+ymJqHtKxphGIIxUC8cQOi/76fK78EDodBHaWAaE
t5eXmHLovOynC2o4QqeL0EZ1ZIC9vESEzguwl2792hI39vJqmm0Jxn6dN822xMPa
y0tE6LwAe+nWry0hrP06b5ptCWHt13lTaktMXct4g9/evM/WLp45OqN/Ht7Y3MNK
t9VmNYwIUS1cKCB3jv9n7zoAmki68AYIhISSIIqCImdBThEEFdQTE0DsoCJFxFNR
UVEED7CADcFy9no2rGc9K3ZPQFHv5GwHig0L9sLZC6i/Cv++LdlNgURClDIfrrMz
+3Zm9pt5W2e+qC3X8jUCPpSlAuTlWkgi3FkWANnbIZ5BHyJkiKiEujUkER5EjEGV
JWIAEWPwStzd6sn+KT5diW6vqG1FusbKFYDTCq5RgWXf2rMsAJpJOlVgtTMvIsag
yhLRgYgxqLKybx2JGAPNeoTWidBej+hExBhUQSJI2Td9jHztA9CW7JsD9wLfwQTE
avL5fBNS9s3ZGMm+KUJW4IfkTCAkORMISc4qmgAN8wkIagIx8ugl7qQATX+q38HH
IACElEWppsCrw68OZsVbI/QQzBOJeSeE1oLhokDedaG+wFcEYjIUvwO+gl+Owu2X
FiDPr6YaJedUaJTAS1wOOHQ8lYzzDe7dPiw6JiRiUKiNnbuDv8OP5VfOgoe1pXSc
BlR4HSdVbjTgu7jRMr3b/BncmcIUPV3BIG6oMFvPStCV6w2nqVK60TK8IjPx/SG8
jV9jZnCZENJT8PRQKtTFL9CDuEwI6dl4OpQPoRWe3pXLhJCuyK+mYjC1KTEYuyLl
YjDwJYOD1ZFxIzyGdQgfHRkVGj0oFFwpLCImNCI6LCa23DuVDjaAZ8n/zK8tmMpr
x7/G/8BfxQvgp/Pv8FmN/hUaMZVTvKsx0eh8GY0YuGNivkDLt7AJpq6Cl/ZbGKkA
qVYBgs+LSAVIupQPNRpoGDib0I80xQGOiAbkJ6tGA3uXhveSULl5h1EDwDuEJaFk
3mFvxDsbqniH8wbwLn+Ck0fJvMPeiHc2VPEOo2OAdwhLQsm8w97a4l0Ha27Ugx9i
LBEEGsXw3YxrCyKN5vAbGusJgEeKdwnDOxvynFOLhG2jHcjzrultGrvlyMu2GIPL
Nn6zH0/b2hPPSj5uLZsSD1rERiJkLtn0ZZp4fsC3a34fxuSqCLoJDXHXcRUEGC81
Jd+YRZma6XsKuhjPMq14iucwlAwehKDO5P9k+62gzSi8Eo88e6SfdfBxMR03wmjF
81PWicS0TQCEEIcFjl0fd6RxhOL5Kww6v7u0T4PiuSKUKZ5DHUnEyxwF+ShN3sgp
B5jJeSfsBC9XlQGyorfJ/yQNXTBdfwiVHQAbkBc9Zg2Ak3IeJ4iuURGsQxosEIfj
orYXkeMmYZHAkk7uAqHEnVknQgkZQgaM4jnP4IAu7aW/l+psxqZaHvKucJVyhX2U
K5ytgK4AZ314tSbvCr1pMwqvxNxQTvLcI/uVuMKy0PnETGUAhBCHBY6dWwauwFzX
ysgVituF7Qoe7A1Y2bgCTkoRTpDUFWAd0mCBOBwXtb0MXCFZj3aF+1p3hXwT0hUu
mJCukGdS8VwBLumtlbhCG+J/Bq/EHXr3benc9oISV3jvfYWYuA+AEOKwwLHrlYEr
MLcdZeQKSq/5mKwrwOwYNuiCNXEFnJTJOEFSV4B1SIMF4nBc1PYycIXn0qtCP11t
u0I0dVXoTl0VhlbAqwI8+zoqcYVU2ozCK/G/f98u0DMkf81R1hVOY7/J6FlAHBY4
dt0ycAXm6b6MXIGstiLYrkC/daNBF6yJK+CkKPwkDKTBAnE4Lmp7GbjCLKkrtOBo
2xVMqK/r/1GuoFMBfx2Jfn8u7wo/0GYUXonlJ5UwrjCPBzkxgDgscOw6ZeAKzAvG
MnIFsoEUwXaF+uwNWNm4Ak4Ku0bEOqTR6dRxlZErzJa6wmut3SBVzjdO8HBqR4Ul
QdqXMTJP2TdOsHdpeC8JSGddM5vKiOKOVR0+ypsNAgKC9oF01hEQyg5IZx3ZIBtk
I2uDdNaRDbLR1AbprCMbZKOpDdJZR0DQFEhnHQFBUyCddQQETYF01hEQNMW31Vl/
qkPqrN/AwzQ7Umc9c3a2xDxjy65Zv+6d/dT0c+zr3+/9zOt3fefPU/VnV7/UK+ng
vpQ9Tr0WuQc71kjdbvH6iMHuwuoJd9y7/110Yl9Gm+zOpw6dbpDk98+uwTWWDl70
MXXF+4kvg6879e/9r9PUrMdWvMszxkWtvHU7cmRAxsHbf8StafnHPkPbT+J/++3Y
ZeOX/zzwWcK2Ox8d281r+9j9pY0oxs3o+qkb091fLy+Y6ZnaLGZaWrtZNSZHV0tJ
/N/S52+e/mBc3fAPriS0us3hNz0e52y80mHDhZx3Oy7MC3k3/cYLSa2R7dZuWHDP
imc3Pmv/z7Xf3/y5wRK3E7tfz915/ObAzOP6mW821faoeyNmi1f4ssafb+349cDh
DslHDiW6vfrw6uMfd1r3b9a4S17sui+Nx98+Gjg5a/z0Ty0cPp1/Wu9cLeGaZXcC
vPbn+ZvHdJ47TvfZgby/ju84WUM3dPb65JBaE5ymWh28r/ekRop/QrLrbrv0hV4/
FtycmHOWf2Vt25ei/L1nvkT9pLf1ZES2+7TTswNNE7pubZQTte29Y5qBRdMtccJz
29e8cLs1vnPKhf/C8s0k0+LEfNwo9vJPWZlu+rv2HPd882ahd52b+yded9rZs9Xa
7a07eJzvelfn7uC1YWH5M+o85Cev9WtQtGKD7cPcE7t3HTkBf3+s25W869Xd7cmF
NRb/eYKffyVwVgCR57DJqwYnNur+8cLAS7X6JzgsqfW68/Se+1Itawm83891yPTn
JjlM+vy5c4+J9/a2HzawTf/daR+tf39c8Pu1t7/GufGamgQWecwc/WJMivM+wfgV
+8087ett3rpLGO359++DnXq18bRd9uaHDSN9nZMm/PXyQcKKkTrrd7isOD/k7DW9
gX9fa2+7ZeSi5Ntm1x8c+vh2dESSxG679+bsPGeXKb2dXBaeDktq8OzQVJeP09v9
w21+Q88jaOTelE9htZIkO2om/fNgv7dZQbBHUqrb63bHvG2WXLblDV560lbY5JSt
85/mSU/q72rr8jFy3uF698XW1xrUZWvCG+BOAgNaPSNHxdpEDrFB2vDqQwI0AEcA
Rhu+i6FAaEBwpIs9wJyxaAyGb3IwIz2YPAfa8Lr4H7mbrDY87DOXGrpGW0gRHy4h
02W3wT5kWWQ6NBWdVrI2PDsnRhse1L5qEFMAdbCmlDnAgbW+jlAOg+4DC9sKQJdO
g72nsu0LiSmGkBN9Tq8uTQFmRJhy/XUaUtV0CRO3gYPDXIjcgrEuWNdS6q+7Ejn0
xbwxH6V1KF5/nVbUcyJy6I71wHpijNZ5SZDnRx5gU3aq6WVXJ6S/TkJ1WernC95I
Q3W+YC1/DGCvXlnsnFWXpX6+UBsaqvMFa3ndb4B6ZbGhuiyAevlq1pfoRb2yymdf
gkX9Ni+ffYm2Va8sNlSXBVAvX836Etiq3+blsy+BrfptXp76EqmbGkylMXce4813
dbwbN1gcj2dB3nsoikyToPdhQrb+ekk1AEDpNEjdVLj7akT0ktZYIKcpVogfMRlf
wAnkOBBxFbqqKpR2JaXRVSWJ6kLEGDC3RyRRfYh1hihtCswCUSqIkG4tcyK6EjEG
VZaIvkSMQZXVZ/dmWQA0016uwLLkPkSMQZUlojsRY1Bl9dl7EDEGmvUIrROhvR7R
k4gxqIJEkPrskErIW2La02cHkeQIwwZmIJLcxRAzI1/lIX12RTCz7cfptxFsNHAU
rtLvJ4g3EAin6ncQLDeoXwFn2wvxGoCWKbyoNSBrzgFdW+luUtCvEHsfaM2r9eyl
2EiPSx2pMoAGiyHeu3SwB1g0Mds+gEPc5svMtqeeGFhQNtte2nt14mWOAkpXPdue
KIRpUtipuGpDVqQjMiDfFjP0wbc1cK7iZtvL29OgNkMov07osFC7sNLTJRg5sx7C
dHBkMlSYbZ/OlMnMtgcw+nmlcQW5msuAcYVMA1fBJ56j8K1BsOAqTyC8YeApeMmr
iK4gwmvgoOAKroXS3aSwvvnDi8lxN8Vk7JWcK7DHugLsMpwJV4CvIpq6AnwTIFBW
rqBYLIlv4Qrr5DRYIMTJkroCnVYxXIGHRXIfm8KVdDFXICSvpBBWxl/tCKbuRuje
w/Qrbf7cwGf9m6JY3jkzGwPMzJ+31ayVQU0zN94CMwxrXgpd8ua6enZUEVqEPL+a
Sprydcg+XchRrksOn/44MIgxnd7TnhjS2JuSJbfBoByyDoqy5N9PkLwq/VhH3+/i
PejHOlT/WAd89q5UP9YRrt9CxDN0MVug31v0gGdmtlV/lOgc73/sHzpiqUCr0egS
ogCtQnmjA0rX6Kv0yUYv7sc64J6P+LGOeHpP9GMdlevHOmAsCvqxDulSPiTNoDnh
tRiExT2FAKRPSRiZp6ykGexdGt5LQuXmHR4hgXcIS8877K0t3nWxPP2V/F95tgJj
g6P8wTwdQUODK/xuvKd8cGNF3tm0ynNOL9pHO3yJYsXl38pCLdhvZa/F22Bk3en6
S/sJxrRMDnG+gRRj/IylA++8FbYM5hW35TC+z1HWi+FrpTpHlcQhcyG6wf3XcKnh
VX4R941hlOE+voU+n9/HMIkP+yrearAh31bUIrmBn5D/xW+flxoy4VU8P0iHsAgP
3+BpUYZMuI9Kh9ACf/Dh42EfQyaE+kA6hCRHc5iKfPWtBk2Ssh+cIC9ENMgLUTsM
Bp5Wk7nVgFHIPcaEhI8OtXGzcXZo4dostGkzJ5emmDMG3YDsCIo/R0F+8CPH2xIP
fNTrGmUXqK+9CwHA4UAJsCeUCI8xtAIw2BQWYdVltR/BojFGCrmHI/lH9WwqI4o7
VnX4KG82CAgI2geSf0RAKDsg+Udkg2yQjawNkn9ENshGUxsk/4hskI2mNkj+EQFB
UyD5RwQETYHkHxEQNAWSf0RA0BTfVv4xSoeUfxyIhzaWpPzjeZ8bEmHGMt+4rZL2
9zYkXBzvn39JsOjvhnWNPWZ5tW98wM3LZ2+62f25V7a75G1yzJpxJ8s1b4pVx9yE
6PkhLiNSEtN+id8aYTfPPCcl9/a5Z5OHuAQ8c5yXIuH9GG7mm3fxuNnNl5fHzp74
yHW2R6tEvn3y3U9G1vaZ1Xzf5bgeXlBv5THf+9dSnY9477/wW9awROugpRsn5jxy
sFif13rc5yVz2nkmxa0+88PbS6M7eP/d7ZHOgozGklH+m6+E9Ezru9Nl7LTsnw7u
CHj/z9OaO41neJr5No6PH7ja8u2wvY/H/BpQMPOIrW6TO2kNH/WM337mt7MPO9rO
f7oq9mLWbbHR0Uufbwzol5Pxdvbx1KiaFqHDrf8+apRp9bLJp53Vri89nTxixPU5
bVJGrbx9Lq/FsXpTzjR0aOPX4kH6pgXrL6Qvr2dmW/vOXOEu56vGWZ6HWya0OhSs
n/y4U+dprgsnhg34cjxsdtIty/v+D83XOdzcnDjdNmhFZh83o1zPtF/P93XD1p68
kz308gDvG3nTmvw271hC4zljNtYICjgtaph7daXPfuvVDiu9LcRBXiuHR5u61Is8
sPpAkl31hPn5Fu4b6j8yjdne9tjh0xs31Rzk5DR6zIHlDzuHdzu35MyHkf0nZTxf
eKhz29xU78J+SatWf0ntnjTAPskldmJhxMCkwUXBc44bXLZtvj63RaTztbz7fqaJ
Y/0dd6elFpzyWrx92XZX/RZbxy78M65m6va4onc3dZOxRN3CfN3FDjudxK8Trjfq
c/58lvvhawZNV485FPYu/unp9tvEq88NNg8+E+y/5m6R28mctfE1J/SotcYwf/PH
L8sN8wceGGe8aeSRmmwVRpj4BtcJ35CIEdE2o8IjY9rYeIdERDQNHBYWExEaaxMT
Gh0D8oxqyzRCruqMJ6oCkAANwBGAkWl0NhYIeQRH8KPwzvhCAmQanTEZmUYbRZnG
BdSgNgWZRgpwtilJppGdpr5M44v49hzyPRGkQBsTPYYyr6qgmaPbpDgAdzReYm05
zOhSegN9bWBfI6oygKPi8AqmwUgZRCgZNJNMv4MEml75/lfVwe535Dny5WQ6ZPpd
CZ0TgYJiv0N9rHiod75DDKoGzSTXBobhM7Qy9zZ6Nn6Ydrh8IWHkrGGeHS1nTbyJ
odCStS4rZ822Ugb2nsrAyFnTqC59dv1aCWkeMZehOXEkvlgvzO+rcyBlw1oQOfhj
AVhgKXNoSeTQGwvC+mBlJxldHnNCMtYkVJelfr6sSVlq5AvW8scA9uqVxc5ZdVnq
5wu1oaE6X7CWl08GqFcWG6rLAqiXr2Z9iV7UK6t89iVY1G/z8tmXaFv1ymJDdVkA
9fLVrC+BrfptXj77Etiq3+blqS+R8pK+ctuCJLUzfsH/7RDHY/S9h6IWL4kGEukq
BbaMtSpA6TTUFiVWITjKK428JElELyLGgKXOjAERfYh1hght6myqQYR0a5kTAXfk
bFRZIvyJGANVWrwlu0a5kqmWJ4CGciICiBgDzSRoK7A6cyARY1BliehNxBioco2S
idDsHAFQQYT2XCOIiDHQrEdonQjt9QjyQBlUQSJImWp46UTdNVHCGdRNchnKVD/V
u8CfZ9JLZMrN5w83cRTBp0xX4worUy2tofZkqnlYbe5j0wDjXiIJVyB0NgbOIKyI
gqSyR07XEMMk6aSkoi/V7+jPcsxnEu1JKvKIPgmSldAnK7ZkpSp+/b8DvzrYaZ6A
v4xvLHjOc+RH8/P4XMOO/GD+BfykIVUv/Aptu2YczI4sQZuQ5/drJYXobbSkUAIl
WVmceiEMoCCk6+LpPe2JUzgxQKL0woXa1rTTwaIM64he8o3Nlhq6i87y80S7DINE
+/gXRIxw4dc0rrNuRWzcLhyyce05yoUL4QsIiDvpxNN7lo2a79cKQn19687WizEa
z31tvFtvuVEg97xxhl6ykZh7wLj0rTsbr8hrfH8IY/BDHc9lQkjfjaefp8LleHog
lwkhPQNPh/IhTMbTxVwmhPTiWneqbmlbtwblutcLlbsufJ1S1rpB5b51keioatFR
+HJYouioDVa65tXeqZmt5gZVpdTckJabejaVEcUdqzp8lDcbBAQE7QNpuSEglB2Q
lhuyQTbIRtYGabkhG2SjqQ3SckM2yEZTG6TlhoCgKZCWGwKCpkBabggImgJpuSEg
aIpvq+UWwyG13AbjoZkxoeW29FaXk83MMzIfPZ7m7C5qP5HTX2KX6zdixoA9WQLH
jilDgvuGd7QcnH93wgY3T7cgMW+E+X/TeJt7+CwueC/O2y04N16QY4K9M+Wsan16
T3qieP+yFlY5q2b8mWg6btyLe3OP14hffWGs/YAmb5u0zl2+bP3VHtOtr67nrOiz
1Kark0/QmadPrHNzp+f3HNdg5mpD78FfNvS0WtgB+xzI8f+t55YPCyY/PrLhB1OL
5mdnPcpucGVzdS9Oy4YWPXq2mLTRMOzln1Z25wtCRzo+6zTx0JXUvenVcmZturdi
1oq1F9sPK3jvfrmr/tZnWMbxtLfmaQv2DBtU91PDg42cvN7677404cfgs4dSvWO7
jbOJ6pCVFbfOX+/AqKmZw69tmuP/RM/xgM2RkekC48O8aTZtP84aefTsn9PPv7lq
d/nQ5V2Bk/7lh4776Lb148LCo27VP09Jm96yYE7aroJLt65eXnP90rXmBXPcBu1O
TPvffB9/MaeNwcUubDUzQ/wPhvGQImVeIVHhscWolJlQId2GVRlAA3AEkFUpM6Q4
YlTKyGFSEgxUysg4QFal7Gcem1v6i5kyMNvAnr0PNBWdVrJKGQlyK6O+AfMXahC/
Kq1L/C4sjW6sdW/W+jpsGEZ6NXg4ew8AXRMa7FyUbWfnrGz7QoIrKIk+A8FSXZpq
gS8wKBx++V6ZasYrcXFxI2r2bHsix+HYQGwQlYPJs9uLIj/soSxLyoGcSeVF5DAC
C8WGKK1D8coddA6eRA5DcWbDMEYlw6jEHkGeb5Mzm+YVTlbkDbarnxMbpc9Jfk95
gA1S7iChuiz184VZWzRU5wvW8scA9uqVxc5ZdVnq5wu1oaE6X7CWV4wAqFcWG6rL
AqiXr2Z9iV7UK6t89iVY1G/z8tmXaFv1ymJDdVkA9fLVrC+BrfptXj77Etiq3+bl
qS+RM26Hy217Jb6dunJcQAsPMcRKVu7IImzY0Ey5A6Bixu3XzMGmLBUgP+OWJGIg
ywIgezv0bQUrACqIkG5VgwjoOcqgnIhBRIxBlSUC5oaw8Urc3erJ/ik+XYluryhP
QLrGyhWA0wquIa/cURIhpSJCe64RyrIAaDYrvwILVjCHRaLKEjGUiDGossod8JKB
Dc16hNaJ0F6PCCNiDKogEaRyB7zugJeRAG0pdzhwL/AdTB4Kfbn5fL7JcUIlgVSh
qJDKHdJ0bSp3OHAfm5KcCYQkZxVVuYP5oAE1gRh59BJ3UlliONXv4MUjgH4tiWlV
WcKKt0boIZgnEvNOCK0Fw0WBvOtCfYGviKUsMeAr+OVgA4gCtAp5fjUVHzhHTWBO
x5RPYIaXuBxw6HgqGecb3Lt9WHRMSMSgUBs7dwd/hx9LP5FZ2/PUeVhbLinQMqDC
C7SocqMR38WNlund5s/gzhSm6OkKBnFDhdl6VoKuXG84TZXSjZbhFZmJ7w/hbfwa
M4PLhJCegqeHUqEufoEexGVCSM/G06F8CK3w9K5cJoR0RX41VXmoTak82BUpV3mA
Lxkc+JYST+9pT3xZ6RA+OjIqNHpQKLhSWERMaER0WExsuXcqHawLz5JvJqgtiOC1
47/gf+BP5wXwr/Dv8FmN/hXiD5VTlUdCNLpARvwBbidZn4blmxhuw9TT5tF+EyN9
D9X6HvB9sUR9D1sMCoKbcmUerE9UrfhG1p7KB9nIJpi+/mNTH/ziCPeWsJjpvzX1
0K+PM6Kj8/UXRx1yBy1DvpHJJgKsxlph5Kdr+FgMYUmAI6IB+a22gfahDsEd9i4N
7yWhcvMOg5OAd7hVKQkl8w57a4t3HayJUQ9+kLFE0N0oht/SuLZgqNEcfh1jPTgt
0zeDEoZ3NuQ5pzxLIjXQGuR51/S6xW458jTWA4PTGH73E0/b2hM3jz5uzZsSzUls
JELmFEaftogbKny75tclJldF0E1oiLuOqyDA+IEp+Qoh3dRM31PQxfiaKbcC3c/b
xS/AyLE13hj5W4bk/2T7daXNKLwSy4+cMcIvKWSLvPe+QszAAkAIcVjg2PVwRxqH
X044xAsTHcxd2qfhNzcV8aO0W6zCnPCaQAtCHUnEyxwF+WxBXtiUA8zkvBN2Utq6
GPniiq7Uf+wNGEMfXX8IlR0AG+xBPACclMk4QXSNimAd0mCBOBwXtb2IHOAFiwSW
dHIXCCXuzDoRSsgQMtDB7CSkZ/EMmunSXlrIKY0rsKmWh7wrDKJcQUy5QmAFdAU4
yXRT4grnaDMKr8SJjt0280+dUuIKp7HfZCYmQhwWOHb4mVNNXQGubyTKyBXo53R5
sF1hKXsDVjaugJNShBMkdQVYhzRYIA7HRW0vA1foJ3WFZD1tu0JfyhVaUa7QowK6
Atx4tlPiCtm0GYVX4ptrcpcIxmUocYV5PMiJAcRhgWPXKQNXYG6ty8gVyAZSBNsV
stgbsLJxBZwUdo2IdUij06njKiNX8NKhXaGejrZcoXI+W8BtCDxbMLcjyiHtyxiZ
p+yzBexdGt5Lgqxipj5GK2YiwUz1bCojijtWdfgobzYICAjaBxLMREAoOyDBTGSD
bJCNrA0SzEQ2yEZTGySYiWyQjaY2SDATAUFTIMFMBARNgQQzERA0BRLMREDQFN9W
MHONDimYOQ8Pm1gTgpnL3SOzm5lnuOkPWxnvbTnIUrcddm+e+S9hgW28+7T3Whjf
67eDuUMs753Zs+6hh5hzPfR9nQ+2qxYIOx7lDp339677r5a2Cmq+0dy8+0qznwrd
Pn35UtizzvvVj/t78p63lWx1Sr+fdG/SsQOBVguTew06Z+X6Fxb4ub+F6ZWlom3T
HiQeXmf5pOjHGzMn1Xrn5OvuGpPl0i6q9ryOqR0nnol50vD1h8Yrv3j/XPud1YwG
C65ObuFXb2N1zN8//kljz1uixD4p54cMnR97clBGnsm8hKNO12PaeK1cJPjV7qLY
huMz/oWh75l+C6++O3ElJOKPScnpN6Iar32zbGrdQ3aGh4/fvv37n4sKJ5nnn/2Q
XNThkmOjbrP2jrJ+cNR2zaG1LmtG375j3X1L2oGdJ27q3A1d0bavb2hUXa8Uvy07
5gclzZ9oP2bclWYRThe59e+MNHad+bLjk/WHWyYku7yolb4+o/WQ49OezZtinBGZ
cqntzl/S9tauf8ni0Md1xwc/3G5wvOtWi32X/V5GDjf16eOdb9Pbzy14/MGCvQGD
Lu/7LzReP//osl3WerO3Hcp6vwa76nW/9cSihFF16y5YMLZv5NaMri07dvojNrD7
OoMZHl13uz6pOTQ+f3C9h04nu50akS3++blJ4KgZz61GvajjsvXQnr4H44T223J/
/7KnseXufmczdToPnTBzW7N/O5lErTqS8V/MxhZpzeI+e7ff8/Helsxds/67IGlw
onn2x4eFH7ZeOP/WbsiclY8Ts56d/KeuXfTaRos7r8q5EmsbOfuHpcJez3eZRV/9
6/dwp+jG9X0cHjccNNLXKWmC15bXU6Nv6Hm8vf7g2bO3oeE6e6LCzRoNHbloTy7/
+oPsM51/SZIM65dksyCIkyTZUTvpr9MPr/1l3WXWtQfHWi9pcP0Y52nsOxe2tCgf
79cw3t8zclSsTeQQGyQx+hWQAA3AEYCRGO1iKBDyCY50sQeYMxaNwZBLcppDBwwk
RnXxP3I3WYlR2GcuNdyMtpAiPlxCpstug33Issh0aCo6rWSJUXZOjMQo1KUGMXZa
B3OnzAEerPV1WCeMPPfBwrYC0KXTYO+pbPtCghnIiT4PV5emwLi6WphyuVAaUpFP
CRO3gYPDuhC5jcZGYhFUDvl3m+kGn/qb2kO1XGhXIocx2CjsF6V1KF4ulBaA6Uzk
EIX3ghiMkeYsCfL8yANsyk7ks+zqhORCSaguS/18iUlkFFTnC9byxwD26pXFzll1
WernC7WhoTpfsJaXqQSoVxYbqssCqJevZn2JXtQrq3z2JVjUb/Py2ZdoW/XKYkN1
WQD18tWsL4Gt+m1ePvsS2Krf5uWpL5EyX6OpNObOY7z5ro534waLIQvy3kNRE5EE
vQ8TsuVCS6oBAEqnQcp8NcWXRkQvaY0FctyxQvyIyfgCTiDHg4irkAFTIQwnKY0M
GEkUyA2wwdwexRNE9SHWGaK0qYcGRKkgQrq1zImACcxsVFkixhAxBmUrJ1oSFIkA
qCBChWvIKORRlgpQTsQolgVAM6nACqyi+QsRY1BliYgiYgyqrJxoNBFjoFmP0DoR
2usRMUSMQRUkgpQThdsZQowJ066caAc+KSdaj0/KiXYxRHKiimBmyI/TdxVsNHAU
rsK5ijcQCKfqewqWG9QXVrwZ8jXxGrhj5ItaA7LmHJBhk+4mRfqzNW3t/TKlt+9G
evQMeWUA3RRDvHfpYA/w8xrMkA/gELf5MjPkFfdXNkNe2oo68TJHAXurniFPmdGA
GNlAioCsZN2IEZegC4bvYWBT3Ax5eXsa1GYI5dcJ7RRqF1Z6ugQjZsNLIEwHRyZD
hRny6UyZzAx5AKNuVBpXkKu5DBhXyDSYLfjEcxS+NdgtuMoTCG8YLBO85FVEV6iF
18BDwRVcC6W7SUG/TU9O4Ol3Of1czhXY41MBdhnOhCvAVxFNXQG+CRAoK1dQLJbE
t3CFdXK6KRDiZEldgU6rGK5AikyTV1KBkLySCoTklbTiuIJ66rijqbsRuvcw/Uqb
6rif9RcJY3kJIhuDg0J/Xj9RK4N/hW68DiIMa14KFc3munp2VBFahDy/mgrOpVNy
HumYchVN+PTHgYGHYEDAnhiG2JsS0bTBoByyDooimsXLZ2qiRQd7qpLPrEra0mO+
i/cgbWnV2tLw2btSaUsH6CcLrQ33iuL0Lwn/x5snWqT/THiPN4aty8/S6FSj0SVE
AVqF8kYHlK7Ra+qXrC3dgWh0gUyjw7sFpC1dabSlYTAK0paWLuVDhwy4ElNhcY8h
AOljEkbmKatDBnuXhveSULl5h2dI4B3C0vMOe2uLd10sT/8AfxbPRWBskMMP5ZkJ
Ghq85nvz/scHFhV5Zx+FPOfKPUsb6InJfsuQfy0LNWG/lr0Wb4ORfNL1l/YTVloO
cb6BFGP8jGUGFyaFLaG84rb8ie+Tw3qOv1aqc1RJPDIXolvcPMOlhm/4HH1jfpTh
v/xa+g35fQwPEqUr3muwId9eVFmSW/gJOQ+/f15qyIRv8PwgHUIO/mRjjIdRhkz4
L5UOYS08bIiHfQyZEOoD6WS9gOU5VC0AX3uvQZOkTA+cvBDRIC9EPTEYeWouc68B
5fQYExI+OtTGzaaZQ0tX15Y2dhHR+H2lMwY1JHuColw4+cnPgDrbwEMe+RFB2RXq
a29DAPRjCewJJcKDDP39AGwKi7DqsoqNYNEYI8fMhiPRRvVsKiOKO1Z1+ChvNggI
CNoHEm1EQCg7INFGZINskI2sDRJtRDbIRlMbJNqIbJCNpjZItBEBQVMg0UYEBE2B
RBsREDQFEm1EQNAU31a0MUqHFG0ciIc2lqRo43mfGxJhxjLfuK2S9vc2JFwc759/
SbDo74Z1jT1mebVvfMDNy2dvutn9uVe2u+RtcsyacSfLNW+KVcfchOj5IS4jUhLT
fonfGmE3zzwnJff2uWeTh7gEPHOclyLh/Rhu5pt38bjZzZeXx86e+Mh1tkerRL59
8t1PRtb2mdV83+W4Hl5Qb+Ux3/vXUp2PeO+/8FvWsETroKUbJ+Y8crBYn9d63Ocl
c9p5JsWtPvPD20ujO3j/3e2RzoKMxpJR/puvhPRM67vTZey07J8O7gh4/8/TmjuN
Z3ia+TaOjx+42vLtsL2Px/waUDDziK1ukztpDR/1jN9+5rezDzvazn+6KvZi1m2x
0dFLn28M6JeT8Xb28dSomhahw63/PmqUafWyyaed1a4vPZ08YsT1OW1SRq28fS6v
xbF6U840dGjj1+JB+qYF6y+kL69nZlv7zlzhLuerxlmeh1smtDoUrJ/8uFPnaa4L
J4YN+HI8bHbSLcv7/g/N1znc3Jw43TZoRWYfN6Ncz7Rfz/d1w9aevJM99PIA7xt5
05r8Nu9YQuM5YzbWCAo4LWqYe3Wlz37r1Q4rvS3EQV4rh0ebutSLPLD6QJJd9YT5
+RbuG+o/Mo3Z3vbY4dMbN9Uc5OQ0esyB5Q87h3c7t+TMh5H9J2U8X3ioc9vcVO/C
fkmrVn9J7Z40wD7JJXZiYcTApMFFwXOOG1y2bb4+t0Wk87W8+36miWP9HXenpRac
8lq8fdl2V/0WW8cu/DOuZur2uKJ3N3WTsUTdwnzdxQ47ncSvE6436nP+fJb74WsG
TVePORT2Lv7p6fbbxKvPDTYPPhPsv+ZukdvJnLXxNSf0qLXGMH/zxy/LDfMHHhhn
vGnkkZpsIUYB3ldb4qFvSMSIaJtR4ZExbWy8QyIimgYOC4uJCI21iQmNjgGFRqTU
WApIgAbgCCCr1CggOGIrNZJaP90wVUqNC6hhbd9WqfFFfHsO+aIIUqC2RJehzKsq
aOboNikOwB2Nl1hbjuyYUwB9cWBfJKoygKPi8ApmwkgZRCgZNJNMv4MEml75/lfV
we535Dny5WQ6ZPpdCZ0TgYJiv0N9rHiod75DDKoGzSTXBsbhM7Qy9zZ6Nn6Ydrh8
IWEUrWG+Aa1o3RFj7rk6sdZlFa3ZVsrA3lMZGEVrGoyitRW+wMOoMjVpGsUrWnsT
RzQWG4fFyuRA7XGnp0SaRMCPFScVxHyIHOKw8dgEpXVQrWjdnchhIjYJm4yVnXp0
ecwJKVqTUF2W+vmypmepkS9Yyx8D2KtXFjtn1WWpny/UhobqfMFaXkkZoF5ZbKgu
C6Bevpr1JXpRr6zy2ZdgUb/Ny2dfom3VK4sN1WUB1MtXs74Etuq3efnsS2CrfpuX
p75EKk2OpdLKn6J1RzlF607fV9F6HBFjUGWFnGOJGIMqS0QcEWPgJxER2EO4g6Js
L9t1WkikqxQqsKL1eJYFQDO12gos5DyBiDGoskRMJGIMqqyi9SQixkCzHqF1IrTX
IyYTMQZVkAhS0RoOERYAUrRmQLNGx7+9ovUhStH6BqVofbKCKlpb4TXoiJEyvtRt
OEe5ojUJ5hUiDytJ0RpQVorW0LtJxMscBflpp6RXeCwzGiW9l4esaHejQX5VZ+iD
wULgXHAc8gOJAPL2NKjNEMqvSxfKjIqnS7ByL+MLitbnKUXr15SidU4FVbSujdeg
k4IrKFO0JiGUEEG8vCuwJ+/QKCtFa/guQCK+bFxBsVgS38IV1ilRtKYXMGPSKoIr
VCZFayYONaFrCPySmrxjqbsRuvcw/Up7mrw8LIDSPI6r8JrHqviN+w786mDZ+pb8
9bzagvf67fgTeR/4pgYB/FDeHdzFpfK3X6GN2oyD2ZElaBPy/H6tJB29jZakS6A0
j4uTv+2GwZM2F86/FOyJcyUxvK70wrfa1kQFOfhkYSxvncjG4JLQnzdB1MrgmdCN
N1jECN9+TeM661bExs2l9AbTMeXCt/DdnNAGjKeSsYohB6+DFegVGD3iRptYci2N
T3C7mzhznY23cV1NSt+6BXhFovH9ISzAD/URlwkh3RIPu1OhpTGGnWCFkO6Mh0T5
eOiMp29jhZBeXOtO1S1t69Ku26FIuevCmAZlrRtU7lsXiVarFq2G8SZItFq6lA/x
ZLjX6YCRjy3FPWkApE9CGJmnrHgy7F0a3ktC5eYdGAPe6flMxaFk3mHvsuedLYEL
p9/GGEjgIv1b9WwqI4o7VnX4KG82CAgI2gfSv0VAKDsg/Vtkg2yQjawN0r9FNshG
Uxukf4tskI2mNkj/FgFBUyD9WwQETYH0bxEQNAXSv0VA0BTfVv9WrEPq3zri4WAL
Uv/2Zx8rJ2GG95R2EhHP7teL/dZZSPq8XiRMaNywXr1OWVuGLa7ZLOjKwqsJG7fc
nZL0rs4von+FQ+7lDxzjbZaw0uNpp4XiK8dqfRJb7z7wsKt4ecOptXdV8x124YXO
pcl+BVF1alyO8vhwS8fI7mRR/ba9V9k2sNjTv8eCVRcmz3/uJ7a8Ve/Mk1kufTZt
WdMorKPLuPRpLm7c+UM7FV1tkp0c1Crkh6WRl/zObKwW/3m3zl8NV/ZJdP9t9cA9
Bxt9Lljx+HLwlpDs4TuvPhV539UbOKtlV/uNOatu2HbJMe09pNHBwbuaZkd2G1X9
Z25fa6fYgLv2S5Z+dgiaEFK05XBd4xu/R06M+NBvauF/ESHHJvlYOT8tiAi6+3Z6
sFH2+x+rb45sNdrvx0yvxbO2PdM3N3/husOsWp1m8a4t+g52F25o1ONAwpDwo33S
Dzo2rH63x5jsEx1uzW5zKOXAvxaHPOfo96hj1Mfl45l3Gy83P+50qeu1mdsN7tRu
MW/ywIRLZyYFz29fZ3JGSrMgkcmb1FTHN6kbWtQZ7ta6jvlPvT8/c/D1S5yRLGx9
Maqd2OsP4eegyYaXxPWs1y+8l1q4pJb5wGpdZ/7x+/a/btY6tfmv2qFDn+z7Z9PM
rtWy79b1Xvz0adIvF//6K9dnZbfCn8MTXjb2XhX3sl/a1Zu63lt83Las6ZX5h+ua
uEPVAjP1+m/L7T9xBHZYb67upNH/DJZ0tT/Tt8dP7f/46PVTVmL9rIuR+4cHmD6a
tHfhhwv/+NhGW43aHiUqbFR/1XAx1v7coxakmG1LYgAQdDzoet1CYiNHx9g4YaRA
LQ1YhRE8EipktlRZSIAGmiMX4t7TiBjpdEAqOcuGKzYQIycXAYNkGng3vQ7nB3od
zhr0OuTL5pteh6s0vU62DrlOzlWFhR5PxsxVhdqV1VxVAZZbtJhzlreFp4M95mzh
9eJZYpmc+bwRUKxEcaweG/R5kL1gEpaB1kCOY2P4VGcQOzmeL8NwowE5+NUQsye3
5TL0sFCaQXrMhUER9OBIIHwk/yxvikgHO87fwmsqssT+4M/neYmwSk647vcivC7v
d85o40M8T14Bp6fxIF4wL5fT2nh8Je3ht7n/owjnfy/Chbxw/mrj30QteOn8WGN3
UTfeVn6IcVAl7eG3uUcowvW+F+HDTBZz/C228OaYPOY4WfTibTTJ5NSyqPzncP3v
R3gk398iVjTH5CTfyaKhaKPJdn4tC7dK2sMzDJdThMMMkO9C+Nwa3TmfLfvw9tTY
wLlmqc87XWM2J93SupL2cEfuch5JuMH3InxWjcb8aVYmZrtqTOKHWB0RnaoxhN/Z
6mIl7eEu3EUU4ZxvTXhNyWRiD7BgZnHAMwWeJDtxAwEBAQEBgQ1VEzfk7REQEIqH
8okb8lYICAhVB8onbshbISAgFA/lEzfkrRAQEIqH8okb8lYICAjFQ/nEDXkrBASE
4qF84oa8FQICQvFQPnFD3goBAaF4wMQNZrpGL95zjJxacQsPf+ETUysWXOAnNDOf
3sjPz/UWt2eaZP6d1aFjFpt/wJxHL/1z8znRtX0GowOCY36Iyzk/dU/0o48fDmUe
C7nekXfXySPC578fL2XMfTztp3ln943s+HFmw1/cBS9ObDQ9mzDTekejCe1CZm60
zTIIfi/8uZO9x4zovk9fcz7HzRFGbXvWbur1no+dY0IneixrE/Pzq6mvJJeWSN6l
hJ1b+rrN+M0hjhv81v+4ZPWd3zn2e4RT93UoeH/8rf7Bbbt7XqjzKe1lu0Ht15uf
GdPs/PKbc93mWo4/tWbP0Ge1xjddhwdfbqy5PrpIZ1YPuxswEaClpBUxhgTGN8Ng
7x5RkcNDB8XYhEUMiVSYDgAA1thhFYcEaKA5IlWQgRf6rS8JB2pokK6MkPFiYvDP
16CJZCQxLgm4J3+sCke6xZ9H/K5wRsInKAIRRGle40aFRoWNDI2IsWkfEhOKRRKT
A7qMDm/arFVT52bOzTByD6hpBKGSz9qjc3vcnjgo0ggOJYLIwCcyJnRgZOQIBRN4
OxdBjO2iupDsZlgiMFClZooJjZK1gYeqCGKmBJ5FTOSgyHDZ7XC7GEEmUOmzsAaY
9KObGJbz5861I6OyYJy8lUQ3XsLeVEpwJP8HAAD//wMADDuDnQ==</Template></GraphPadPrismFile>
