# Supplementary material for: Par protein localization during the early development of Mnemiopsis leidyi suggests different modes of epithelial organization in the metazoa
Source: eLife. 2020 Jul 27;9:e54927. doi: 10.7554/eLife.54927 (PMC7441587; doi:10.7554/eLife.54927)
Supplement: Figure 2—figure supplement 8—source data 1. [file elife-54927-fig2-figsupp8-data1.xlsx]

## Sheet: 1 cell
Embryo 1				2				3				4
X	Y			X	Y			X	Y			X	Y
0	9.7	0	0.204877	0	26.2273	0	0.614615	0	30.1818	0	0.753974	0	9	0	0.109115
0.203	10.6909	0.00191913	0.225806	0.203	27.0818	0.00149012	0.63464	0.203	29.7424	0.00184477	0.742997	0.162	12.4903	0.00156573	0.151432
0.406	12.6545	0.00383826	0.26728	0.406	27.6727	0.00298023	0.648487	0.406	30.7273	0.00368953	0.767601	0.324	12.6646	0.00313146	0.153545
0.609	15.4	0.0057574	0.325269	0.609	27.6909	0.00447035	0.648914	0.609	30.4545	0.0055343	0.760786	0.487	14.4364	0.00470686	0.175026
0.812	17.2727	0.00767653	0.364822	0.812	28.0818	0.00596046	0.658074	0.812	30.7879	0.00737907	0.769115	0.649	21.4267	0.00627259	0.259776
1.015	16.6545	0.00959566	0.351765	1.015	27.7545	0.00745058	0.650404	1.015	32.1515	0.00922383	0.803179	0.811	19.0805	0.00783832	0.231331
1.218	14.4273	0.0115148	0.304724	1.218	28.1364	0.0089407	0.659354	1.218	28.8788	0.0110686	0.721424	0.973	17.1465	0.00940406	0.207883
1.421	13.9455	0.0134339	0.294548	1.421	30.2273	0.0104308	0.708352	1.421	30.7727	0.0129134	0.768735	1.135	16.4009	0.0109698	0.198843
1.624	14.0545	0.0153531	0.29685	1.624	29.7182	0.0119209	0.696422	1.624	32.0455	0.0147581	0.800531	1.297	17.1264	0.0125355	0.207639
1.827	14.3545	0.0172722	0.303186	1.827	29.3455	0.013411	0.687688	1.827	31.2273	0.0166029	0.780092	1.46	22.4122	0.0141109	0.271724
2.03	12.9818	0.0191913	0.274193	2.03	29.2818	0.0149012	0.686195	2.03	32.303	0.0184477	0.806964	1.622	25.8156	0.0156766	0.312987
2.233	13.1636	0.0211104	0.278033	2.233	30.8	0.0163913	0.721773	2.233	30.5455	0.0202924	0.763059	1.784	18.8014	0.0172424	0.227947
2.436	14.8455	0.0230296	0.313557	2.436	30.7909	0.0178814	0.72156	2.436	30.5909	0.0221372	0.764194	1.946	25.6434	0.0188081	0.310899
2.639	16.8545	0.0249487	0.355989	2.639	30.5273	0.0193715	0.715382	2.639	30.6667	0.023982	0.766087	2.108	24.4388	0.0203738	0.296294
2.842	17.3727	0.0268678	0.366935	2.842	30.9364	0.0208616	0.724969	2.842	29.8333	0.0258267	0.745268	2.27	19.3797	0.0219396	0.234958
3.045	17.9	0.028787	0.378072	3.045	30.8364	0.0223517	0.722626	3.045	32.3939	0.0276715	0.809235	2.433	19.2812	0.023515	0.233764
3.248	18.3091	0.0307061	0.386713	3.248	31.1182	0.0238419	0.72923	3.248	31.4091	0.0295163	0.784633	2.595	21.1689	0.0250807	0.25665
3.451	18.7455	0.0326252	0.39593	3.451	31.2273	0.025332	0.731786	3.451	32.5152	0.031361	0.812265	2.757	19.4514	0.0266464	0.235827
3.654	18.8273	0.0345444	0.397658	3.654	30.6364	0.0268221	0.717939	3.654	32.1515	0.0332058	0.803179	2.919	18.1766	0.0282122	0.220372
3.858	19.7727	0.036473	0.417626	3.858	29.2364	0.0283195	0.685131	3.858	31.6212	0.0350597	0.789932	3.081	16.8415	0.0297779	0.204185
4.061	19.6455	0.0383921	0.414939	4.061	30.0909	0.0298097	0.705156	4.061	31.2879	0.0369044	0.781605	3.243	12.8689	0.0313436	0.156022
4.264	20.3727	0.0403112	0.430299	4.264	30.7	0.0312998	0.71943	4.264	30.3788	0.0387492	0.758895	3.406	18.1099	0.032919	0.219563
4.467	21.6455	0.0422304	0.457182	4.467	30.4455	0.0327899	0.713466	4.467	29.3182	0.040594	0.7324	3.568	19.1712	0.0344848	0.23243
4.67	20.9364	0.0441495	0.442205	4.67	30.8091	0.03428	0.721986	4.67	31.2576	0.0424387	0.780849	3.73	21.6646	0.0360505	0.26266
4.873	20.8	0.0460686	0.439324	4.873	30.4182	0.0357701	0.712826	4.873	28.7879	0.0442835	0.719153	3.892	20.8181	0.0376162	0.252397
5.076	20.9818	0.0479877	0.443164	5.076	30.4	0.0372602	0.712399	5.076	29.4848	0.0461283	0.736562	4.054	15.9689	0.039182	0.193606
5.279	22.2273	0.0499069	0.46947	5.279	30.0727	0.0387504	0.704729	5.279	31.197	0.047973	0.779335	4.216	17.9479	0.0407477	0.217599
5.482	23.6364	0.051826	0.499232	5.482	28.9545	0.0402405	0.678525	5.482	29.8939	0.0498178	0.746782	4.379	15.5258	0.0423231	0.188234
5.685	22.9455	0.0537451	0.48464	5.685	29.0364	0.0417306	0.680444	5.685	29.9394	0.0516626	0.747918	4.541	17.6023	0.0438888	0.213409
5.888	24.4182	0.0556643	0.515745	5.888	29.4273	0.0432207	0.689605	5.888	28.197	0.0535073	0.704391	4.703	18.3471	0.0454545	0.222439
6.091	23.7909	0.0575834	0.502495	6.091	29.2273	0.0447108	0.684918	6.091	28.9394	0.0553521	0.722937	4.865	14.1085	0.0470203	0.17105
6.294	23.5636	0.0595025	0.497695	6.294	29.1909	0.0462009	0.684065	6.294	30.8182	0.0571969	0.769872	5.027	17.3827	0.048586	0.210747
6.497	23.9273	0.0614217	0.505376	6.497	29.7727	0.0476911	0.697699	6.497	30.1212	0.0590416	0.75246	5.189	21.4617	0.0501517	0.2602
6.7	23.0818	0.0633408	0.487518	6.7	28.9273	0.0491812	0.677888	6.7	30.9697	0.0608864	0.773656	5.352	22.2925	0.0517271	0.270273
6.903	22.8455	0.0652599	0.482527	6.903	28.3091	0.0506713	0.663401	6.903	30.9545	0.0627312	0.773277	5.514	18.9978	0.0532929	0.230328
7.106	23.9364	0.0671791	0.505569	7.106	28.5909	0.0521614	0.670004	7.106	30.4848	0.0645759	0.761543	5.676	20.6478	0.0548586	0.250332
7.309	23.1818	0.0690982	0.48963	7.309	28.5545	0.0536515	0.669151	7.309	31.1212	0.0664207	0.777441	5.838	17.002	0.0564243	0.206131
7.512	23.3636	0.0710173	0.49347	7.512	27.3545	0.0551416	0.64103	7.512	31.2273	0.0682655	0.780092	6	19.9182	0.0579901	0.241487
7.715	22.8273	0.0729365	0.482143	7.715	27.2364	0.0566318	0.638263	7.715	30.303	0.0701102	0.757002	6.163	19.6273	0.0595655	0.23796
7.918	22.3818	0.0748556	0.472733	7.918	27.6545	0.0581219	0.648061	7.918	31.0152	0.071955	0.774793	6.325	18.6654	0.0611312	0.226298
8.121	24.4273	0.0767747	0.515937	8.121	26.9727	0.059612	0.632083	8.121	30.697	0.0737998	0.766844	6.487	14.1285	0.0626969	0.171293
8.324	23.1909	0.0786939	0.489823	8.324	27.4455	0.0611021	0.643163	8.324	31.2879	0.0756445	0.781605	6.649	13.7163	0.0642627	0.166295
8.527	24.1182	0.080613	0.509408	8.527	26.8636	0.0625922	0.629527	8.527	29.9697	0.0774893	0.748675	6.811	10.3505	0.0658284	0.125489
8.73	23.1091	0.0825321	0.488095	8.73	26.7818	0.0640823	0.62761	8.73	28.4697	0.0793341	0.711204	6.973	12.7734	0.0673941	0.154864
8.933	24.5273	0.0844513	0.518049	8.933	26.5636	0.0655724	0.622496	8.933	29.2121	0.0811788	0.72975	7.136	18.3983	0.0689695	0.22306
9.136	23.6909	0.0863704	0.500383	9.136	25.9	0.0670626	0.606945	9.136	29.1667	0.0830236	0.728616	7.298	22.0365	0.0705352	0.267169
9.339	23.5364	0.0882895	0.49712	9.339	25.3727	0.0685527	0.594589	9.339	26.9545	0.0848684	0.673352	7.46	15.4912	0.072101	0.187814
9.542	23.1818	0.0902086	0.48963	9.542	25.9636	0.0700428	0.608436	9.542	27.0758	0.0867131	0.676383	7.622	12.2432	0.0736667	0.148436
9.745	23.0727	0.0921278	0.487326	9.745	25.9273	0.0715329	0.607585	9.745	26.9242	0.0885579	0.672596	7.784	16.914	0.0752324	0.205064
9.948	22.3818	0.0940469	0.472733	9.948	26.1727	0.073023	0.613336	9.948	27.9242	0.0904027	0.697577	7.946	17.9202	0.0767982	0.217263
10.151	23.4545	0.095966	0.49539	10.151	26.5091	0.0745131	0.621219	10.151	27.6061	0.0922474	0.68963	8.109	14.7765	0.0783736	0.179149
10.354	22.2636	0.0978852	0.470237	10.354	25.6727	0.0760033	0.601619	10.354	26.0152	0.0940922	0.649888	8.271	12.7955	0.0799393	0.155132
10.557	22.2818	0.0998043	0.470621	10.557	26.4	0.0774934	0.618663	10.557	27.0152	0.095937	0.674869	8.433	15.1943	0.081505	0.184215
10.76	21.5091	0.101723	0.454301	10.76	26.8	0.0789835	0.628036	10.76	26.9242	0.0977817	0.672596	8.595	15.4186	0.0830708	0.186934
10.963	20.9455	0.103643	0.442397	10.963	26.6818	0.0804736	0.625266	10.963	26.2273	0.0996265	0.655186	8.757	18.5329	0.0846365	0.224692
11.166	20.2182	0.105562	0.427035	11.166	25.4909	0.0819637	0.597358	11.166	27.1818	0.101471	0.679031	8.919	19.3258	0.0862022	0.234305
11.37	19.4455	0.10749	0.410715	11.37	25.3364	0.0834612	0.593738	11.37	27.2424	0.103325	0.680544	9.082	16.9472	0.0877776	0.205467
11.573	20.3091	0.109409	0.428955	11.573	24.4545	0.0849513	0.573071	11.573	27.1818	0.10517	0.679031	9.244	13.6453	0.0893434	0.165435
11.776	20.0818	0.111329	0.424154	11.776	24.9909	0.0864414	0.585641	11.776	26.5455	0.107015	0.663135	9.406	16.9339	0.0909091	0.205305
11.979	20.7545	0.113248	0.438363	11.979	24.9182	0.0879315	0.583938	11.979	23.9394	0.108859	0.598032	9.568	17.0176	0.0924748	0.20632
12.182	20.4455	0.115167	0.431836	12.182	23.6545	0.0894216	0.554324	12.182	25.1515	0.110704	0.628312	9.73	15.9671	0.0940406	0.193584
12.385	21.2545	0.117086	0.448923	12.385	23.9182	0.0909118	0.560504	12.385	25.5	0.112549	0.637017	9.892	11.613	0.0956063	0.140795
12.588	22.1273	0.119005	0.467358	12.588	23.8818	0.0924019	0.559651	12.588	26.0303	0.114394	0.650265	10.055	16.8329	0.0971817	0.204081
12.791	22.0182	0.120924	0.465054	12.791	23.4182	0.093892	0.548786	12.791	26.1667	0.116238	0.653672	10.217	18.3815	0.0987474	0.222856
12.994	21.9636	0.122843	0.4639	12.994	23.9364	0.0953821	0.56093	12.994	25.4545	0.118083	0.635881	10.379	24.5074	0.100313	0.297126
13.197	22.6091	0.124762	0.477534	13.197	24.5909	0.0968722	0.576268	13.197	25.8788	0.119928	0.64648	10.541	21.2109	0.101879	0.257159
13.4	22.5	0.126682	0.47523	13.4	23.9182	0.0983623	0.560504	13.4	25.1667	0.121773	0.628691	10.703	20.3627	0.103445	0.246876
13.603	22.4091	0.128601	0.47331	13.603	24.4091	0.0998525	0.572007	13.603	25.3788	0.123618	0.63399	10.866	23.1822	0.10502	0.281059
13.806	21.9091	0.13052	0.462749	13.806	23.9182	0.101343	0.560504	13.806	26.1818	0.125462	0.65405	11.028	20.1254	0.106586	0.243999
14.009	21.6727	0.132439	0.457756	14.009	24.2636	0.102833	0.568598	14.009	26	0.127307	0.649508	11.19	20.8513	0.108151	0.2528
14.212	21.2455	0.134358	0.448733	14.212	24.9091	0.104323	0.583724	14.212	27.0455	0.129152	0.675626	11.352	17.8453	0.109717	0.216355
14.415	18.7909	0.136277	0.396889	14.415	25.7182	0.105813	0.602685	14.415	27.4848	0.130997	0.6866	11.514	16.6881	0.111283	0.202325
14.618	18.4818	0.138196	0.39036	14.618	26.1091	0.107303	0.611846	14.618	26.4545	0.132841	0.660862	11.676	20.5562	0.112849	0.249222
14.821	16.8455	0.140116	0.355799	14.821	27.1727	0.108793	0.63677	14.821	25.3182	0.134686	0.632476	11.839	18.8604	0.114424	0.228662
15.024	15.6818	0.142035	0.33122	15.024	26.8727	0.110283	0.62974	15.024	26.7273	0.136531	0.667677	12.001	15.8523	0.11599	0.192192
15.227	14.9	0.143954	0.314708	15.227	26.8091	0.111773	0.628249	15.227	28.2424	0.138376	0.705526	12.163	16.1874	0.117556	0.196255
15.43	14.4909	0.145873	0.306067	15.43	27.0455	0.113264	0.633789	15.43	27.5606	0.14022	0.688493	12.325	21.913	0.119121	0.265672
15.633	14.2727	0.147792	0.301458	15.633	27.4818	0.114754	0.644014	15.633	27.6364	0.142065	0.690387	12.487	17.1201	0.120687	0.207563
15.836	13.8	0.149711	0.291474	15.836	27.8091	0.116244	0.651684	15.836	27.5	0.14391	0.68698	12.649	15.9788	0.122253	0.193726
16.039	14.8273	0.15163	0.313172	16.039	28.2091	0.117734	0.661057	16.039	26.4697	0.145755	0.661242	12.812	13.5285	0.123828	0.164019
16.242	15.1364	0.153549	0.319701	16.242	28.4636	0.119224	0.667021	16.242	28.197	0.1476	0.704391	12.974	15.0136	0.125394	0.182024
16.445	15.9727	0.155469	0.337365	16.445	29.5364	0.120714	0.692161	16.445	27.6818	0.149444	0.691521	13.136	13.3224	0.12696	0.16152
16.648	16.5364	0.157388	0.349271	16.648	29.4182	0.122204	0.689392	16.648	28.8182	0.151289	0.71991	13.298	16.1025	0.128525	0.195226
16.851	17.2545	0.159307	0.364438	16.851	30.2	0.123694	0.707712	16.851	27.7576	0.153134	0.693415	13.46	12.0372	0.130091	0.145938
17.054	17.0636	0.161226	0.360406	17.054	29.9455	0.125184	0.701748	17.054	27.2727	0.154979	0.681301	13.622	16.5968	0.131657	0.201218
17.257	16.9636	0.163145	0.358294	17.257	29.6909	0.126675	0.695782	17.257	26.6667	0.156823	0.666163	13.785	18.013	0.133232	0.218388
17.46	18.3	0.165064	0.38652	17.46	30.2273	0.128165	0.708352	17.46	26.4545	0.158668	0.660862	13.947	17.4465	0.134798	0.21152
17.663	18.4455	0.166983	0.389594	17.663	30.9	0.129655	0.724116	17.663	26.2727	0.160513	0.65632	14.109	17.5207	0.136364	0.21242
17.866	17.9818	0.168903	0.3798	17.866	30.1909	0.131145	0.707499	17.866	27.1364	0.162358	0.677896	14.271	15.1902	0.137929	0.184165
18.069	18.6909	0.170822	0.394777	18.069	30.6545	0.132635	0.718363	18.069	26.6818	0.164202	0.66654	14.433	14.5193	0.139495	0.176031
18.272	18.7364	0.172741	0.395738	18.272	31.7545	0.134125	0.744141	18.272	27.6364	0.166047	0.690387	14.595	15.9424	0.141061	0.193285
18.475	18.7818	0.17466	0.396697	18.475	31.9	0.135615	0.747551	18.475	27.197	0.167892	0.67941	14.758	22.6707	0.142636	0.274858
18.678	18.3636	0.176579	0.387864	18.678	31.9727	0.137105	0.749254	18.678	28	0.169737	0.69947	14.92	17.5094	0.144202	0.212283
18.882	17.2818	0.178508	0.365015	18.882	31.9636	0.138603	0.749041	18.882	27.3182	0.171591	0.682438	15.082	21.5812	0.145768	0.261649
19.085	16.4727	0.180427	0.347925	19.085	31.9909	0.140093	0.749681	19.085	27.6818	0.173435	0.691521	15.244	20.9503	0.147333	0.254
19.288	16.1	0.182346	0.340053	19.288	32.6273	0.141583	0.764594	19.288	27.8485	0.17528	0.695686	15.406	24.0588	0.148899	0.291687
19.491	16.1727	0.184265	0.341589	19.491	31.7091	0.143073	0.743077	19.491	28.7879	0.177125	0.719153	15.568	25.1411	0.150465	0.304809
19.694	15.7818	0.186184	0.333333	19.694	31.8727	0.144563	0.746911	19.694	28.9848	0.17897	0.724072	15.731	25.0699	0.15204	0.303946
19.897	15.8545	0.188103	0.334868	19.897	32.0818	0.146053	0.751811	19.897	30.0758	0.180814	0.751326	15.893	19.1529	0.153606	0.232208
20.1	15.3	0.190022	0.323156	20.1	31.9818	0.147544	0.749467	20.1	31.197	0.182659	0.779335	16.055	21.8835	0.155172	0.265314
20.303	15.3182	0.191942	0.323541	20.303	31.7364	0.149034	0.743717	20.303	31.6061	0.184504	0.789554	16.217	20.6103	0.156737	0.249878
20.506	15.1727	0.193861	0.320468	20.506	31.8455	0.150524	0.746273	20.506	30.5	0.186349	0.761923	16.379	23.2667	0.158303	0.282084
20.709	15.1182	0.19578	0.319317	20.709	32.4818	0.152014	0.761185	20.709	30.0758	0.188193	0.751326	16.542	26.0397	0.159879	0.315704
20.912	15.2455	0.197699	0.322005	20.912	33.3091	0.153504	0.780572	20.912	29.803	0.190038	0.744511	16.704	20.2031	0.161444	0.244941
21.115	14.8	0.199618	0.312596	21.115	32.7273	0.154994	0.766938	21.115	28.0606	0.191883	0.700984	16.866	23.3104	0.16301	0.282614
21.318	16.0273	0.201537	0.338518	21.318	32.1273	0.156484	0.752877	21.318	29.6061	0.193728	0.739592	17.028	28.6485	0.164576	0.347332
21.521	15.3091	0.203456	0.323349	21.521	32.8182	0.157974	0.769068	21.521	30.9242	0.195573	0.77252	17.19	30.715	0.166142	0.372387
21.724	15.7818	0.205375	0.333333	21.724	32.6182	0.159464	0.764381	21.724	29.7273	0.197417	0.74262	17.352	26.9612	0.167707	0.326876
21.927	14.7909	0.207295	0.312404	21.927	31.9182	0.160955	0.747977	21.927	30.4697	0.199262	0.761166	17.515	23.028	0.169283	0.27919
22.13	14.0545	0.209214	0.29685	22.13	32.1455	0.162445	0.753304	22.13	30.0455	0.201107	0.750569	17.677	23.2527	0.170848	0.281914
22.333	14.1636	0.211133	0.299154	22.333	32.6182	0.163935	0.764381	22.333	31.3788	0.202952	0.783876	17.839	21.3377	0.172414	0.258697
22.536	14.2727	0.213052	0.301458	22.536	31.0818	0.165425	0.728377	22.536	30.4848	0.204796	0.761543	18.001	31.1732	0.17398	0.377942
22.739	14.4909	0.214971	0.306067	22.739	30.1727	0.166915	0.707073	22.739	31.803	0.206641	0.794473	18.163	37.0321	0.175546	0.448975
22.942	14.3182	0.21689	0.302419	22.942	31.5636	0.168405	0.739667	22.942	31.0303	0.208486	0.77517	18.325	35.9298	0.177111	0.43561
23.145	14.6091	0.218809	0.308564	23.145	31.2364	0.169895	0.732	23.145	29.7576	0.210331	0.743377	18.488	37.1915	0.178687	0.450907
23.348	14.5364	0.220729	0.307028	23.348	30.6364	0.171385	0.717939	23.348	29.7727	0.212175	0.743754	18.65	36.7634	0.180252	0.445717
23.551	13.2455	0.222648	0.279763	23.551	30.6727	0.172875	0.71879	23.551	29	0.21402	0.724451	18.812	27.7438	0.181818	0.336364
23.754	13.7455	0.224567	0.290323	23.754	31.4727	0.174366	0.737537	23.754	28.4848	0.215865	0.711581	18.974	26.4868	0.183384	0.321124
23.957	13.7909	0.226486	0.291282	23.957	31.7727	0.175856	0.744567	23.957	29.3939	0.21771	0.734291	19.136	24.4794	0.18495	0.296787
24.16	14.0273	0.228405	0.296275	24.16	31.5545	0.177346	0.739454	24.16	28.2121	0.219555	0.704769	19.298	32.9694	0.186515	0.399719
24.363	13.9364	0.230324	0.294355	24.363	32.6364	0.178836	0.764807	24.363	27.6818	0.221399	0.691521	19.461	29.4232	0.188091	0.356725
24.566	13.9364	0.232243	0.294355	24.566	31.7182	0.180326	0.74329	24.566	26.7879	0.223244	0.669191	19.623	26.1974	0.189657	0.317615
24.769	13.8909	0.234162	0.293394	24.769	31.6909	0.181816	0.74265	24.769	26.2121	0.225089	0.654806	19.785	23.9745	0.191222	0.290665
24.972	14.4364	0.236082	0.304916	24.972	31.9636	0.183306	0.749041	24.972	26.0303	0.226934	0.650265	19.947	26.1527	0.192788	0.317074
25.175	14.9727	0.238001	0.316243	25.175	31.4818	0.184796	0.73775	25.175	27.697	0.228778	0.691901	20.109	27.8462	0.194354	0.337605
25.378	15.3182	0.23992	0.323541	25.378	31.7545	0.186287	0.744141	25.378	29.3333	0.230623	0.732777	20.271	33.1837	0.195919	0.402317
25.581	15.6091	0.241839	0.329685	25.581	31.1909	0.187777	0.730933	25.581	29	0.232468	0.724451	20.434	32.339	0.197495	0.392076
25.784	15.4818	0.243758	0.326996	25.784	32.2091	0.189267	0.754794	25.784	30.2879	0.234313	0.756624	20.596	33.201	0.199061	0.402527
25.987	16.5273	0.245677	0.349079	25.987	32.3909	0.190757	0.759054	25.987	30.3333	0.236157	0.757758	20.758	36.0645	0.200626	0.437244
26.19	16.8909	0.247596	0.356758	26.19	31.4364	0.192247	0.736686	26.19	30.4242	0.238002	0.760029	20.92	40.6359	0.202192	0.492667
26.394	17.4	0.249525	0.367511	26.394	31.6364	0.193744	0.741373	26.394	29.0909	0.239856	0.726722	21.082	38.8757	0.203758	0.471326
26.597	17.8	0.251444	0.37596	26.597	32.2818	0.195235	0.756498	26.597	29.6364	0.241701	0.740349	21.244	28.3824	0.205323	0.344106
26.8	18.4	0.253363	0.388632	26.8	32.1818	0.196725	0.754154	26.8	30.7727	0.243546	0.768735	21.407	23.2117	0.206899	0.281417
27.003	17.5818	0.255282	0.371351	27.003	31.5182	0.198215	0.738603	27.003	29.6818	0.24539	0.741483	21.569	28.1829	0.208465	0.341688
27.206	17.7545	0.257201	0.374999	27.206	32.3545	0.199705	0.758201	27.206	29.7273	0.247235	0.74262	21.731	23.3378	0.21003	0.282946
27.409	17.4909	0.259121	0.369431	27.409	32.6091	0.201195	0.764168	27.409	29.1061	0.24908	0.727102	21.893	26.3332	0.211596	0.319262
27.612	18.3091	0.26104	0.386713	27.612	32.2273	0.202685	0.755221	27.612	30.3939	0.250925	0.759272	22.055	29.0752	0.213162	0.352506
27.815	18.6636	0.262959	0.3942	27.815	32.3091	0.204175	0.757137	27.815	27.9848	0.252769	0.69909	22.218	29.8504	0.214737	0.361904
28.018	18.8636	0.264878	0.398424	28.018	32.9455	0.205665	0.772051	28.018	27.8333	0.254614	0.695306	22.38	28.9286	0.216303	0.350728
28.221	17.5909	0.266797	0.371543	28.221	31.5	0.207155	0.738177	28.221	29.1364	0.256459	0.727859	22.542	23.5459	0.217869	0.285469
28.424	17.0091	0.268716	0.359255	28.424	31.2727	0.208646	0.73285	28.424	29.2576	0.258304	0.730886	22.704	24.8706	0.219434	0.301529
28.627	17.4636	0.270635	0.368854	28.627	32.4364	0.210136	0.760121	28.627	30.5758	0.260148	0.763816	22.866	22.3995	0.221	0.27157
28.83	17.4182	0.272555	0.367896	28.83	33.3909	0.211626	0.782489	28.83	31.2424	0.261993	0.780469	23.028	21.3287	0.222566	0.258588
29.033	17.9273	0.274474	0.378648	29.033	32.6	0.213116	0.763954	29.033	32.0303	0.263838	0.800151	23.191	21.8763	0.224141	0.265227
29.236	18.3	0.276393	0.38652	29.236	33.3273	0.214606	0.780998	29.236	30.6364	0.265683	0.76533	23.353	24.6974	0.225707	0.29943
29.439	18.4273	0.278312	0.389209	29.439	32.4909	0.216096	0.761398	29.439	30.6061	0.267528	0.764573	23.515	21.3058	0.227273	0.25831
29.642	18.4455	0.280231	0.389594	29.642	32.8636	0.217586	0.770132	29.642	29.1667	0.269372	0.728616	23.677	21.3106	0.228838	0.258368
29.845	18.6909	0.28215	0.394777	29.845	32.6818	0.219076	0.765871	29.845	29.2424	0.271217	0.730507	23.839	15.1282	0.230404	0.183413
30.048	18.6273	0.284069	0.393433	30.048	33.4182	0.220567	0.783128	30.048	30.697	0.273062	0.766844	24.001	16.4783	0.23197	0.199782
30.251	17.9091	0.285988	0.378264	30.251	32.5545	0.222057	0.762888	30.251	30.3788	0.274907	0.758895	24.164	15.6983	0.233545	0.190325
30.454	17.6	0.287908	0.371735	30.454	32.6545	0.223547	0.765232	30.454	30.4394	0.276751	0.760409	24.326	13.6533	0.235111	0.165532
30.657	17.7182	0.289827	0.374232	30.657	32.1182	0.225037	0.752664	30.657	31.1061	0.278596	0.777064	24.488	11.6348	0.236677	0.14106
30.86	17.2636	0.291746	0.36463	30.86	32.3364	0.226527	0.757777	30.86	31.3333	0.280441	0.78274	24.65	13.2339	0.238243	0.160447
31.063	17.1364	0.293665	0.361944	31.063	31.2182	0.228017	0.731573	31.063	30.3636	0.282286	0.758515	24.812	10.0851	0.239808	0.122271
31.266	17.4727	0.295584	0.369047	31.266	31.4273	0.229507	0.736473	31.266	29.9848	0.28413	0.749053	24.974	12.2925	0.241374	0.149033
31.469	17.4364	0.297503	0.36828	31.469	32.0545	0.230997	0.751171	31.469	30.9091	0.285975	0.772143	25.137	6.2277	0.242949	0.0755042
31.672	16.0364	0.299422	0.33871	31.672	33.3273	0.232487	0.780998	31.672	30.697	0.28782	0.766844	25.299	6.2603	0.244515	0.0758994
31.875	16.6091	0.301342	0.350806	31.875	33.1273	0.233978	0.776311	31.875	30.303	0.289665	0.757002	25.461	8.43	0.246081	0.102205
32.078	16.8182	0.303261	0.355223	32.078	32.6727	0.235468	0.765658	32.078	30.4545	0.29151	0.760786	25.623	6.6033	0.247647	0.080058
32.281	16.6455	0.30518	0.351575	32.281	32.0818	0.236958	0.751811	32.281	30.4394	0.293354	0.760409	25.785	6.8594	0.249212	0.0831629
32.484	14.8818	0.307099	0.314323	32.484	32.9818	0.238448	0.772902	32.484	29.803	0.295199	0.744511	25.947	11.4926	0.250778	0.139335
32.687	14.6273	0.309018	0.308948	32.687	33.6727	0.239938	0.789092	32.687	29.9394	0.297044	0.747918	26.11	13.5505	0.252353	0.164285
32.89	14.6364	0.310937	0.30914	32.89	33.3182	0.241428	0.780785	32.89	28.6061	0.298889	0.714611	26.272	14.9997	0.253919	0.181855
33.093	14.7273	0.312856	0.31106	33.093	33.3455	0.242918	0.781425	33.093	29.9394	0.300733	0.747918	26.434	13.7341	0.255485	0.166511
33.296	15.5636	0.314775	0.328724	33.296	33.1818	0.244408	0.777588	33.296	30.9848	0.302578	0.774034	26.596	16.7985	0.257051	0.203664
33.499	15.8636	0.316695	0.33506	33.499	33.1091	0.245899	0.775885	33.499	30.8333	0.304423	0.770249	26.758	12.7253	0.258616	0.154281
33.702	15.7273	0.318614	0.332182	33.702	33.2364	0.247389	0.778868	33.702	30.0303	0.306268	0.750189	26.92	13.8888	0.260182	0.168387
33.906	16.1	0.320542	0.340053	33.906	32.6273	0.248886	0.764594	33.906	30.3788	0.308122	0.758895	27.083	17.2626	0.261757	0.209291
34.109	16.4545	0.322461	0.347541	34.109	32.2273	0.250376	0.755221	34.109	29.5909	0.309966	0.739213	27.245	15.0439	0.263323	0.182391
34.312	17.3727	0.324381	0.366935	34.312	32.2727	0.251866	0.756284	34.312	28.9848	0.311811	0.724072	27.407	13.48	0.264889	0.163431
34.515	18.3727	0.3263	0.388056	34.515	33.2364	0.253356	0.778868	34.515	28.3636	0.313656	0.708553	27.569	14.0474	0.266455	0.17031
34.718	19.2364	0.328219	0.406298	34.718	34.0091	0.254847	0.796976	34.718	27.8485	0.315501	0.695686	27.731	10.2119	0.26802	0.123808
34.921	22.1091	0.330138	0.466974	34.921	34.1818	0.256337	0.801023	34.921	27.0152	0.317345	0.674869	27.894	10.0944	0.269596	0.122384
35.124	24.5	0.332057	0.517473	35.124	34.4364	0.257827	0.806989	35.124	28.3333	0.31919	0.707796	28.056	10.4289	0.271162	0.126439
35.327	25.6818	0.333976	0.542434	35.327	34.1	0.259317	0.799106	35.327	27.4394	0.321035	0.685466	28.218	9.5124	0.272727	0.115328
35.53	24.6364	0.335895	0.520354	35.53	34.0182	0.260807	0.797189	35.53	26.197	0.32288	0.654429	28.38	10.6945	0.274293	0.129659
35.733	26.1455	0.337814	0.552228	35.733	34.8909	0.262297	0.81764	35.733	27.1667	0.324724	0.678653	28.542	11.5957	0.275859	0.140585
35.936	26.2455	0.339734	0.55434	35.936	34.2818	0.263787	0.803366	35.936	27.8182	0.326569	0.694929	28.704	14.0935	0.277424	0.170869
36.139	26.5909	0.341653	0.561635	36.139	34.2364	0.265277	0.802302	36.139	26.697	0.328414	0.66692	28.867	16.0815	0.279	0.194971
36.342	27.6	0.343572	0.582949	36.342	33.3091	0.266767	0.780572	36.342	27.3182	0.330259	0.682438	29.029	18.8374	0.280566	0.228383
36.545	28.7091	0.345491	0.606374	36.545	32.6455	0.268258	0.765021	36.545	27	0.332103	0.674489	29.191	18.1802	0.282131	0.220415
36.748	27.2182	0.34741	0.574885	36.748	34.6636	0.269748	0.812313	36.748	28.1212	0.333948	0.702498	29.353	15.1866	0.283697	0.184121
36.951	27.6	0.349329	0.582949	36.951	34.0364	0.271238	0.797615	36.951	26.5152	0.335793	0.662378	29.515	16.7487	0.285263	0.20306
37.154	26.3182	0.351248	0.555875	37.154	33.7091	0.272728	0.789945	37.154	25.4242	0.337638	0.635124	29.677	16.2564	0.286829	0.197091
37.357	25.5909	0.353168	0.540514	37.357	34.3455	0.274218	0.804859	37.357	26.1515	0.339483	0.653293	29.84	12.7431	0.288404	0.154496
37.56	25.7091	0.355087	0.54301	37.56	35.7	0.275708	0.8366	37.56	26.5758	0.341327	0.663892	30.002	13.8353	0.28997	0.167738
37.763	25.2364	0.357006	0.533026	37.763	35.4727	0.277198	0.831274	37.763	27.6364	0.343172	0.690387	30.164	14.6245	0.291535	0.177306
37.966	24.5364	0.358925	0.518241	37.966	35.2909	0.278688	0.827014	37.966	25.5455	0.345017	0.638154	30.326	22.239	0.293101	0.269624
38.169	24.6091	0.360844	0.519777	38.169	33.8545	0.280179	0.793353	38.169	25.4545	0.346862	0.635881	30.488	21.1234	0.294667	0.256099
38.372	26.2182	0.362763	0.553763	38.372	34	0.281669	0.796762	38.372	26.2121	0.348706	0.654806	30.65	16.2957	0.296233	0.197568
38.575	25.0727	0.364682	0.529569	38.575	34.9636	0.283159	0.819344	38.575	25.7727	0.350551	0.64383	30.813	17.5369	0.297808	0.212616
38.778	25.7909	0.366601	0.544738	38.778	35.3091	0.284649	0.82744	38.778	25.8939	0.352396	0.646858	30.975	19.3686	0.299374	0.234824
38.981	25.9818	0.368521	0.54877	38.981	33.8818	0.286139	0.793992	38.981	25.0909	0.354241	0.626798	31.137	19.4934	0.300939	0.236337
39.184	26.0455	0.37044	0.550116	39.184	34.3182	0.287629	0.804219	39.184	25.3333	0.356085	0.632853	31.299	18.2969	0.302505	0.22183
39.387	27.0636	0.372359	0.571619	39.387	35.0091	0.289119	0.82041	39.387	25.803	0.35793	0.644587	31.461	16.259	0.304071	0.197123
39.59	26.6636	0.374278	0.563171	39.59	34.0727	0.290609	0.798466	39.59	23.1515	0.359775	0.578349	31.623	19.8382	0.305637	0.240517
39.793	26.9	0.376197	0.568164	39.793	33.5636	0.292099	0.786536	39.793	24.5	0.36162	0.612036	31.786	20.5974	0.307212	0.249721
39.996	27.5909	0.378116	0.582757	39.996	33.6455	0.29359	0.788455	39.996	24.697	0.363465	0.616958	31.948	15.3437	0.308778	0.186026
40.199	28.2	0.380035	0.595622	40.199	32.8182	0.29508	0.769068	40.199	23.9091	0.365309	0.597275	32.11	15.7241	0.310343	0.190638
40.402	28.9	0.381954	0.610406	40.402	34.4364	0.29657	0.806989	40.402	23.3485	0.367154	0.583271	32.272	14.088	0.311909	0.170802
40.605	28.8455	0.383874	0.609255	40.605	33.8727	0.29806	0.793779	40.605	24.5909	0.368999	0.614307	32.434	10.0731	0.313475	0.122126
40.808	28.0818	0.385793	0.593125	40.808	33.8182	0.29955	0.792502	40.808	23.8788	0.370844	0.596518	32.597	14.6882	0.31505	0.178079
41.011	28.5909	0.387712	0.603878	41.011	34.2091	0.30104	0.801662	41.011	22.8788	0.372688	0.571537	32.759	11.2406	0.316616	0.13628
41.214	27.9273	0.389631	0.589862	41.214	33.5727	0.30253	0.786749	41.214	22.6667	0.374533	0.566239	32.921	10.4793	0.318182	0.12705
41.418	28.3455	0.39156	0.598695	41.418	32.8091	0.304028	0.768855	41.418	21.9242	0.376387	0.54769	33.083	13.1313	0.319748	0.159203
41.621	27.9818	0.393479	0.591013	41.621	32.8455	0.305518	0.769708	41.621	23.6818	0.378232	0.591597	33.245	12.2299	0.321313	0.148274
41.824	29.1182	0.395398	0.615015	41.824	32.8091	0.307008	0.768855	41.824	24.7576	0.380077	0.618472	33.407	13.415	0.322879	0.162643
42.027	27.9636	0.397317	0.590628	42.027	33.0364	0.308498	0.774181	42.027	23.7727	0.381921	0.593868	33.57	18.8154	0.324454	0.228117
42.23	29.2818	0.399236	0.618471	42.23	33.5455	0.309988	0.786111	42.23	26.6818	0.383766	0.66654	33.732	19.4549	0.32602	0.23587
42.433	29.5182	0.401155	0.623464	42.433	32.6182	0.311478	0.764381	42.433	26.197	0.385611	0.654429	33.894	17.8347	0.327586	0.216227
42.636	28.1727	0.403074	0.595045	42.636	32.3364	0.312968	0.757777	42.636	23.6061	0.387456	0.589706	34.056	18.408	0.329152	0.223177
42.839	28.2818	0.404994	0.597349	42.839	31.9	0.314459	0.747551	42.839	26.2121	0.3893	0.654806	34.218	15.1092	0.330717	0.183183
43.042	29.2455	0.406913	0.617704	43.042	33.0909	0.315949	0.775458	43.042	25.7424	0.391145	0.643073	34.38	17.5034	0.332283	0.21221
43.245	28.2545	0.408832	0.596773	43.245	32.6364	0.317439	0.764807	43.245	25.6212	0.39299	0.640045	34.543	19.1831	0.333858	0.232575
43.448	28.9	0.410751	0.610406	43.448	32.4636	0.318929	0.760758	43.448	24.8485	0.394835	0.620742	34.705	20.3038	0.335424	0.246162
43.651	28.7909	0.41267	0.608102	43.651	32.3545	0.320419	0.758201	43.651	25.5909	0.396679	0.639288	34.867	13.7148	0.33699	0.166277
43.854	30.0909	0.414589	0.63556	43.854	31.2545	0.321909	0.732424	43.854	23.4394	0.398524	0.585541	35.029	11.0671	0.338556	0.134177
44.057	29.6455	0.416508	0.626152	44.057	31.3273	0.323399	0.73413	44.057	23.2121	0.400369	0.579863	35.191	11.1113	0.340121	0.134713
44.26	31.6455	0.418427	0.668395	44.26	31.8818	0.324889	0.747124	44.26	23.5	0.402214	0.587055	35.353	13.75	0.341687	0.166704
44.463	31.6636	0.420347	0.668777	44.463	33.1727	0.326379	0.777375	44.463	24.197	0.404058	0.604467	35.516	13.9764	0.343263	0.169449
44.666	30.5455	0.422266	0.645162	44.666	33.5818	0.32787	0.786962	44.666	23.5606	0.405903	0.588569	35.678	12.8763	0.344828	0.156111
44.869	31.3	0.424185	0.661098	44.869	33.7636	0.32936	0.791222	44.869	24.0152	0.407748	0.599926	35.84	14.0009	0.346394	0.169746
45.072	30.2364	0.426104	0.638633	45.072	33.3727	0.33085	0.782062	45.072	25.1818	0.409593	0.629068	36.002	19.332	0.34796	0.23438
45.275	29.9182	0.428023	0.631912	45.275	33.2273	0.33234	0.778655	45.275	25.0303	0.411438	0.625284	36.164	20.1161	0.349525	0.243886
45.478	30	0.429942	0.63364	45.478	33.7091	0.33383	0.789945	45.478	26.0455	0.413282	0.650645	36.326	15.2624	0.351091	0.18504
45.681	31.1091	0.431861	0.657066	45.681	34.0364	0.33532	0.797615	45.681	25.1515	0.415127	0.628312	36.489	14.1445	0.352667	0.171487
45.884	30.7909	0.433781	0.650345	45.884	33.8818	0.33681	0.793992	45.884	23.7121	0.416972	0.592354	36.651	8.1003	0.354232	0.0982075
46.087	31.4182	0.4357	0.663594	46.087	33.7727	0.3383	0.791436	46.087	23.5	0.418817	0.587055	36.813	8.469	0.355798	0.102678
46.29	29.9636	0.437619	0.632871	46.29	33.5636	0.339791	0.786536	46.29	22.9697	0.420661	0.573808	36.975	9.3055	0.357364	0.112819
46.493	30.8273	0.439538	0.651114	46.493	33.4909	0.341281	0.784832	46.493	22.8939	0.422506	0.571914	37.137	12.7092	0.35893	0.154085
46.696	30.1364	0.441457	0.636521	46.696	33.0455	0.342771	0.774394	46.696	23.5758	0.424351	0.588949	37.299	15.9861	0.360495	0.193814
46.899	29.8	0.443376	0.629416	46.899	32.8909	0.344261	0.770771	46.899	24.9242	0.426196	0.622633	37.462	14.5172	0.362071	0.176006
47.102	29.9727	0.445295	0.633063	47.102	33.8455	0.345751	0.793142	47.102	23.7424	0.42804	0.593111	37.624	16.3058	0.363636	0.19769
47.305	30.2727	0.447214	0.6394	47.305	33.0636	0.347241	0.774819	47.305	21.8333	0.429885	0.545419	37.786	18.2515	0.365202	0.22128
47.508	31.2091	0.449134	0.659178	47.508	33.9727	0.348731	0.796123	47.508	23.3182	0.43173	0.582514	37.948	17.9168	0.366768	0.217222
47.711	29.2909	0.451053	0.618663	47.711	34.2	0.350221	0.801449	47.711	24.1667	0.433575	0.60371	38.11	17.1814	0.368334	0.208306
47.914	29.0364	0.452972	0.613287	47.914	34.7	0.351711	0.813166	47.914	23.4242	0.43542	0.585162	38.273	18.7943	0.369909	0.227861
48.117	29.8364	0.454891	0.630184	48.117	35.6545	0.353202	0.835534	48.117	24.0758	0.437264	0.601439	38.435	16.9801	0.371475	0.205866
48.32	29.6909	0.45681	0.627111	48.32	35.6727	0.354692	0.835961	48.32	24.1364	0.439109	0.602953	38.597	15.0212	0.37304	0.182116
48.523	28.9727	0.458729	0.611942	48.523	35.9	0.356182	0.841287	48.523	22.7576	0.440954	0.568509	38.759	13.1849	0.374606	0.159853
48.726	28.3545	0.460648	0.598885	48.726	36.1364	0.357672	0.846827	48.726	23.7121	0.442799	0.592354	38.921	13.8118	0.376172	0.167453
48.93	28.6455	0.462577	0.605031	48.93	35.5091	0.359169	0.832127	48.93	24.0758	0.444652	0.601439	39.083	12.7312	0.377738	0.154352
49.133	28.2364	0.464496	0.59639	49.133	34.8182	0.360659	0.815936	49.133	25.6061	0.446497	0.639668	39.246	16.8537	0.379313	0.204333
49.336	28.3818	0.466415	0.599461	49.336	35.2727	0.36215	0.826587	49.336	25.9848	0.448342	0.649128	39.408	15.523	0.380879	0.1882
49.539	28.9364	0.468334	0.611175	49.539	35.6	0.36364	0.834257	49.539	27.1515	0.450187	0.678274	39.57	15.8205	0.382444	0.191807
49.742	28.1091	0.470253	0.593702	49.742	36.7364	0.36513	0.860888	49.742	25.4242	0.452032	0.635124	39.732	12.5071	0.38401	0.151635
49.945	28.9909	0.472173	0.612326	49.945	35.3818	0.36662	0.829144	49.945	26.0455	0.453876	0.650645	39.894	13.4053	0.385576	0.162525
50.148	28.6636	0.474092	0.605413	50.148	34.9818	0.36811	0.81977	50.148	26.2424	0.455721	0.655563	40.056	14.0541	0.387142	0.170391
50.351	29.4273	0.476011	0.621544	50.351	35.1182	0.3696	0.822966	50.351	25.0758	0.457566	0.62642	40.219	19.2564	0.388717	0.233463
50.554	31.0818	0.47793	0.656489	50.554	35.9909	0.37109	0.843417	50.554	25.3788	0.459411	0.63399	40.381	21.3397	0.390283	0.258721
50.757	29.8909	0.479849	0.631336	50.757	35.5818	0.37258	0.833831	50.757	25.3182	0.461255	0.632476	40.543	18.9744	0.391849	0.230044
50.96	30.3091	0.481768	0.640169	50.96	35.3909	0.374071	0.829357	50.96	26.1364	0.4631	0.652915	40.705	15.505	0.393414	0.187982
51.163	30.1	0.483687	0.635752	51.163	34.6909	0.375561	0.812953	51.163	24.5	0.464945	0.612036	40.867	16.7367	0.39498	0.202915
51.366	30.5636	0.485607	0.645544	51.366	35.8727	0.377051	0.840648	51.366	23.9848	0.46679	0.599166	41.029	22.069	0.396546	0.267563
51.569	30.8455	0.487526	0.651498	51.569	34.9273	0.378541	0.818493	51.569	23.1667	0.468634	0.578729	41.192	18.7051	0.398121	0.226779
51.772	31.1091	0.489445	0.657066	51.772	34.6182	0.380031	0.811249	51.772	24.0909	0.470479	0.601817	41.354	16.6585	0.399687	0.201967
51.975	32.0273	0.491364	0.676459	51.975	34.5364	0.381521	0.809332	51.975	23.6212	0.472324	0.590083	41.516	15.3968	0.401253	0.18667
52.178	33.2182	0.493283	0.701613	52.178	34.0727	0.383011	0.798466	52.178	24.8788	0.474169	0.621499	41.678	16.2463	0.402818	0.196969
52.381	30.6545	0.495202	0.647464	52.381	34.3	0.384501	0.803793	52.381	23.6515	0.476013	0.59084	41.84	19.5578	0.404384	0.237117
52.584	30.2727	0.497121	0.6394	52.584	34.0636	0.385991	0.798253	52.584	23.7121	0.477858	0.592354	42.002	15.4843	0.40595	0.187731
52.787	29.6	0.49904	0.625191	52.787	35.2727	0.387482	0.826587	52.787	22.6364	0.479703	0.565482	42.165	13.5987	0.407525	0.16487
52.99	29.9727	0.50096	0.633063	52.99	34.5364	0.388972	0.809332	52.99	24.303	0.481548	0.607115	42.327	12.3967	0.409091	0.150297
53.193	28.9909	0.502879	0.612326	53.193	33.7364	0.390462	0.790585	53.193	24.3939	0.483393	0.609386	42.489	12.0359	0.410657	0.145922
53.396	28.9091	0.504798	0.610599	53.396	32.5545	0.391952	0.762888	53.396	24.6364	0.485237	0.615444	42.651	13.4521	0.412222	0.163092
53.599	29.4636	0.506717	0.62231	53.599	33.7818	0.393442	0.791649	53.599	23.6667	0.487082	0.59122	42.813	20.9774	0.413788	0.254329
53.802	29.2091	0.508636	0.616935	53.802	34.0727	0.394932	0.798466	53.802	23.2424	0.488927	0.58062	42.975	23.4855	0.415354	0.284737
54.005	29.3182	0.510555	0.619239	54.005	34.5909	0.396422	0.81061	54.005	23.3788	0.490772	0.584028	43.138	18.7399	0.416929	0.227201
54.208	29.0455	0.512474	0.61348	54.208	34.8	0.397912	0.81551	54.208	23.303	0.492616	0.582134	43.3	15.7649	0.418495	0.191133
54.411	29.3636	0.514393	0.620198	54.411	34.8182	0.399402	0.815936	54.411	23.2424	0.494461	0.58062	43.462	16.7746	0.420061	0.203374
54.614	29.4545	0.516313	0.622118	54.614	33.5636	0.400893	0.786536	54.614	24.0606	0.496306	0.60106	43.624	14.4837	0.421626	0.175599
54.817	29.2545	0.518232	0.617894	54.817	33.5091	0.402383	0.785258	54.817	24.3182	0.498151	0.607495	43.786	25.3114	0.423192	0.306874
55.02	30.5273	0.520151	0.644777	55.02	32.9545	0.403873	0.772262	55.02	23.6515	0.499995	0.59084	43.949	22.0473	0.424768	0.2673
55.223	30.6909	0.52207	0.648233	55.223	33.3818	0.405363	0.782275	55.223	25.6061	0.50184	0.639668	44.111	14.5692	0.426333	0.176636
55.426	29.7	0.523989	0.627304	55.426	34.2818	0.406853	0.803366	55.426	23.0303	0.503685	0.575322	44.273	18.789	0.427899	0.227797
55.629	30.5364	0.525908	0.644969	55.629	34.3091	0.408343	0.804006	55.629	22.9697	0.50553	0.573808	44.435	23.3452	0.429465	0.283036
55.832	28.7273	0.527827	0.606759	55.832	33.7455	0.409833	0.790798	55.832	24.2727	0.507375	0.606358	44.597	23.9869	0.43103	0.290816
56.035	29.5455	0.529747	0.62404	56.035	33.5091	0.411323	0.785258	56.035	23.8182	0.509219	0.595004	44.759	25.5291	0.432596	0.309513
56.238	28.1818	0.531666	0.595237	56.238	32.0364	0.412814	0.750747	56.238	25.197	0.511064	0.629448	44.922	22.3894	0.434172	0.271448
56.441	28.2	0.533585	0.595622	56.441	32.1364	0.414304	0.75309	56.441	24.3939	0.512909	0.609386	45.084	28.2928	0.435737	0.34302
56.645	28.6455	0.535513	0.605031	56.645	32.7727	0.415801	0.768002	56.645	24.1212	0.514763	0.602574	45.246	26.2236	0.437303	0.317933
56.848	28.4818	0.537433	0.601574	56.848	33.3455	0.417291	0.781425	56.848	25.7121	0.516607	0.642316	45.408	16.484	0.438869	0.199851
57.051	29.1	0.539352	0.614631	57.051	34.1636	0.418781	0.800596	57.051	26.1515	0.518452	0.653293	45.57	19.6087	0.440435	0.237735
57.254	30.0455	0.541271	0.634601	57.254	34.3818	0.420271	0.80571	57.254	24.6364	0.520297	0.615444	45.732	14.1118	0.442	0.17109
57.457	30.8909	0.54319	0.652457	57.457	33.4364	0.421762	0.783555	57.457	24.7121	0.522142	0.617335	45.895	23.3355	0.443576	0.282918
57.66	28.7818	0.545109	0.60791	57.66	33.6636	0.423252	0.788879	57.66	23.9697	0.523987	0.598789	46.057	22.154	0.445141	0.268594
57.863	29.7364	0.547028	0.628072	57.863	33.7273	0.424742	0.790372	57.863	23.2727	0.525831	0.581377	46.219	21.8712	0.446707	0.265165
58.066	29.9818	0.548947	0.633256	58.066	32.5	0.426232	0.761611	58.066	24.4697	0.527676	0.611279	46.381	22.4863	0.448273	0.272622
58.269	29.4091	0.550866	0.621159	58.269	32.6727	0.427722	0.765658	58.269	24.0606	0.529521	0.60106	46.543	20.2441	0.449839	0.245438
58.472	29.7364	0.552786	0.628072	58.472	33.1182	0.429212	0.776098	58.472	23.2727	0.531366	0.581377	46.705	19.4913	0.451404	0.236311
58.675	29.8545	0.554705	0.630567	58.675	32.9909	0.430702	0.773115	58.675	23.1515	0.53321	0.578349	46.868	19.9072	0.45298	0.241354
58.878	29.6	0.556624	0.625191	58.878	33.7091	0.432192	0.789945	58.878	22.8182	0.535055	0.570023	47.03	17.281	0.454545	0.209514
59.081	30.4455	0.558543	0.643049	59.081	33.9182	0.433682	0.794845	59.081	23.6364	0.5369	0.590463	47.192	19.0427	0.456111	0.230872
59.284	30.3091	0.560462	0.640169	59.284	33.6909	0.435173	0.789519	59.284	22.8939	0.538745	0.571914	47.354	19.0173	0.457677	0.230564
59.487	28.4909	0.562381	0.601766	59.487	34.7909	0.436663	0.815296	59.487	23.8182	0.540589	0.595004	47.516	21.3201	0.459243	0.258483
59.69	28.5727	0.5643	0.603493	59.69	34.0636	0.438153	0.798253	59.69	23.7273	0.542434	0.592734	47.678	19.6993	0.460808	0.238833
59.893	28.5182	0.566219	0.602342	59.893	34.1455	0.439643	0.800172	59.893	23.5152	0.544279	0.587435	47.841	22.1305	0.462384	0.268309
60.096	28.4545	0.568139	0.600997	60.096	34.2273	0.441133	0.802089	60.096	21.8333	0.546124	0.545419	48.003	23.4518	0.46395	0.284328
60.299	29.0727	0.570058	0.614054	60.299	33.6091	0.442623	0.787602	60.299	23.0909	0.547968	0.576836	48.165	23.0428	0.465515	0.279369
60.502	28.9727	0.571977	0.611942	60.502	33.4909	0.444113	0.784832	60.502	24.2576	0.549813	0.605981	48.327	21.7714	0.467081	0.263955
60.705	30.5727	0.573896	0.645736	60.705	33.8636	0.445603	0.793566	60.705	22.6667	0.551658	0.566239	48.489	28.6202	0.468647	0.346989
60.908	30.2545	0.575815	0.639015	60.908	33.3727	0.447094	0.782062	60.908	22.6364	0.553503	0.565482	48.651	26.1124	0.470212	0.316585
61.111	30.6636	0.577734	0.647656	61.111	33.4273	0.448584	0.783342	61.111	22.6212	0.555348	0.565102	48.814	25.0021	0.471788	0.303124
61.314	32.1	0.579653	0.677995	61.314	32.2455	0.450074	0.755647	61.314	21.8485	0.557192	0.545799	48.976	24.6017	0.473354	0.298269
61.517	31.7727	0.581573	0.671082	61.517	33.0636	0.451564	0.774819	61.517	21.5	0.559037	0.537093	49.138	26.3616	0.474919	0.319606
61.72	29.7545	0.583492	0.628455	61.72	33.0545	0.453054	0.774605	61.72	21.4545	0.560882	0.535957	49.3	21.6294	0.476485	0.262233
61.923	29.5909	0.585411	0.624999	61.923	32.5909	0.454544	0.763741	61.923	22.4091	0.562727	0.559803	49.462	21.2961	0.478051	0.258192
62.126	31.4545	0.58733	0.664361	62.126	29.9	0.456034	0.700682	62.126	21.9697	0.564571	0.548827	49.625	21.1591	0.479626	0.256531
62.329	29.8182	0.589249	0.6298	62.329	30.6091	0.457524	0.717299	62.329	23.5152	0.566416	0.587435	49.787	21.259	0.481192	0.257743
62.532	30.6	0.591168	0.646313	62.532	30.7	0.459014	0.71943	62.532	22.4697	0.568261	0.561317	49.949	26.2533	0.482758	0.318293
62.735	29.4545	0.593087	0.622118	62.735	31.5182	0.460505	0.738603	62.735	23.7879	0.570106	0.594247	50.111	20.3263	0.484323	0.246435
62.938	30.0273	0.595006	0.634217	62.938	31.5182	0.461995	0.738603	62.938	23.6818	0.57195	0.591597	50.273	23.4224	0.485889	0.283972
63.141	30.7	0.596926	0.648425	63.141	31.1818	0.463485	0.73072	63.141	23.4242	0.573795	0.585162	50.435	25.7113	0.487455	0.311722
63.344	29.9	0.598845	0.631528	63.344	30.7909	0.464975	0.72156	63.344	24.1818	0.57564	0.604087	50.598	28.1488	0.48903	0.341274
63.547	31.2	0.600764	0.658986	63.547	31.2636	0.466465	0.732637	63.547	23.3636	0.577485	0.583648	50.76	28.9484	0.490596	0.350968
63.75	30.1273	0.602683	0.636329	63.75	31.2091	0.467955	0.73136	63.75	22.4545	0.57933	0.560938	50.922	26.976	0.492162	0.327055
63.953	29.5909	0.604602	0.624999	63.953	31.2091	0.469445	0.73136	63.953	22.7424	0.581174	0.56813	51.084	21.5418	0.493727	0.261171
64.157	30.8818	0.606531	0.652265	64.157	31.9091	0.470943	0.747764	64.157	22.1364	0.583028	0.552991	51.246	21.5304	0.495293	0.261033
64.36	29.6091	0.60845	0.625384	64.36	32.7364	0.472433	0.767151	64.36	21.4545	0.584873	0.535957	51.408	26.9657	0.496859	0.32693
64.563	29.8091	0.610369	0.629608	64.563	31.6364	0.473923	0.741373	64.563	22.4848	0.586718	0.561695	51.571	29.4414	0.498434	0.356945
64.766	28.5091	0.612288	0.60215	64.766	31.9	0.475413	0.747551	64.766	23.0758	0.588562	0.576458	51.733	25	0.5	0.303098
64.969	29.4455	0.614207	0.621928	64.969	32.0455	0.476903	0.75096	64.969	22.4545	0.590407	0.560938	51.895	24.5494	0.501566	0.297635
65.172	29.1091	0.616126	0.614823	65.172	30.5636	0.478393	0.716233	65.172	22.5	0.592252	0.562074	52.057	23.6128	0.503131	0.28628
65.375	28.8182	0.618046	0.608679	65.375	30.0727	0.479883	0.704729	65.375	23.5606	0.594097	0.588569	52.219	28.037	0.504697	0.339919
65.578	30.8273	0.619965	0.651114	65.578	30.6364	0.481374	0.717939	65.578	23.4242	0.595942	0.585162	52.381	25.9596	0.506263	0.314732
65.781	29.3545	0.621884	0.620006	65.781	31.1636	0.482864	0.730294	65.781	23.197	0.597786	0.579486	52.544	22.3728	0.507838	0.271246
65.984	30.8818	0.623803	0.652265	65.984	30.4455	0.484354	0.713466	65.984	22.8788	0.599631	0.571537	52.706	23.1181	0.509404	0.280282
66.187	30.1818	0.625722	0.63748	66.187	30.7	0.485844	0.71943	66.187	22.2576	0.601476	0.556019	52.868	23.1877	0.51097	0.281126
66.39	29.8545	0.627641	0.630567	66.39	30.6455	0.487334	0.718152	66.39	22.6667	0.603321	0.566239	53.03	28.1458	0.512536	0.341238
66.593	31.6636	0.62956	0.668777	66.593	30.3273	0.488824	0.710696	66.593	22.3939	0.605165	0.559424	53.192	24.4313	0.514101	0.296203
66.796	31.5818	0.631479	0.66705	66.796	31.2364	0.490314	0.732	66.796	20.7273	0.60701	0.51779	53.354	22.3925	0.515667	0.271485
66.999	31.7727	0.633399	0.671082	66.999	30.4182	0.491804	0.712826	66.999	20.8182	0.608855	0.520061	53.517	30.9227	0.517242	0.374905
67.202	32.1364	0.635318	0.678764	67.202	30.3182	0.493294	0.710482	67.202	22.2424	0.6107	0.555639	53.679	30.2379	0.518808	0.366602
67.405	33.3091	0.637237	0.703533	67.405	30.6091	0.494785	0.717299	67.405	22.0455	0.612544	0.55072	53.841	24.629	0.520374	0.2986
67.608	32.7909	0.639156	0.692587	67.608	31.2	0.496275	0.731147	67.608	21.6667	0.614389	0.541257	54.003	25.5574	0.52194	0.309856
67.811	33.3182	0.641075	0.703725	67.811	31.2	0.497765	0.731147	67.811	24.0455	0.616234	0.600682	54.165	24.1263	0.523505	0.292506
68.014	33.8273	0.642994	0.714478	68.014	31.3364	0.499255	0.734343	68.014	22.7273	0.618079	0.567752	54.327	27.4532	0.525071	0.332841
68.217	33.2	0.644913	0.701228	68.217	31.7364	0.500745	0.743717	68.217	23.6061	0.619923	0.589706	54.49	29.6084	0.526646	0.35897
68.42	33.8818	0.646832	0.715629	68.42	30.8636	0.502235	0.723263	68.42	23.8788	0.621768	0.596518	54.652	31.487	0.528212	0.381746
68.623	34.8364	0.648752	0.735791	68.623	30.5727	0.503725	0.716446	68.623	23.8485	0.623613	0.595761	54.814	26.9764	0.529778	0.32706
68.826	33.7909	0.650671	0.713709	68.826	29.9818	0.505215	0.702599	68.826	22.9545	0.625458	0.573428	54.976	32.5426	0.531344	0.394544
69.029	34.7091	0.65259	0.733102	69.029	30.4727	0.506706	0.714103	69.029	22.9091	0.627303	0.572294	55.138	30.9765	0.532909	0.375557
69.232	35	0.654509	0.739247	69.232	30.2636	0.508196	0.709203	69.232	23.6212	0.629147	0.590083	55.301	29.5018	0.534485	0.357678
69.435	35.2182	0.656428	0.743855	69.435	29.7182	0.509686	0.696422	69.435	22.8333	0.630992	0.5704	55.463	30.4851	0.53605	0.369599
69.638	35.3909	0.658347	0.747503	69.638	29.9273	0.511176	0.701322	69.638	23.303	0.632837	0.582134	55.625	30.5839	0.537616	0.370797
69.841	34.9636	0.660266	0.738478	69.841	29.7	0.512666	0.695995	69.841	23.1364	0.634682	0.577972	55.787	31.4375	0.539182	0.381146
70.044	35.4	0.662186	0.747695	70.044	30.2091	0.514156	0.707926	70.044	23.5152	0.636526	0.587435	55.949	30.297	0.540748	0.367319
70.247	35.8091	0.664105	0.756336	70.247	29.8909	0.515646	0.700469	70.247	23.1515	0.638371	0.578349	56.111	26.7406	0.542313	0.324201
70.45	35.7636	0.666024	0.755375	70.45	29.4727	0.517136	0.690669	70.45	23.0909	0.640216	0.576836	56.274	23.4643	0.543889	0.28448
70.653	36.8273	0.667943	0.777842	70.653	29.7	0.518626	0.695995	70.653	22.4091	0.642061	0.559803	56.436	23.2893	0.545455	0.282358
70.856	35.1909	0.669862	0.743279	70.856	29.8	0.520117	0.698339	70.856	22.2424	0.643905	0.555639	56.598	21.7864	0.54702	0.264137
71.059	36.2364	0.671781	0.765361	71.059	28.6364	0.521607	0.671071	71.059	22.9091	0.64575	0.572294	56.76	32.2807	0.548586	0.391369
71.262	38.0636	0.6737	0.803954	71.262	28.5818	0.523097	0.669791	71.262	24.5	0.647595	0.612036	56.922	26.9041	0.550152	0.326183
71.465	37.4091	0.675619	0.79013	71.465	28.0091	0.524587	0.65637	71.465	22.9242	0.64944	0.572671	57.084	29.5172	0.551717	0.357864
71.669	37	0.677548	0.781489	71.669	28.7909	0.526084	0.674691	71.669	22.5152	0.651294	0.562454	57.247	31.4579	0.553293	0.381393
71.872	36.5273	0.679467	0.771505	71.872	29.0364	0.527574	0.680444	71.872	23.0606	0.653138	0.576079	57.409	30.1409	0.554859	0.365426
72.075	37.0636	0.681386	0.782833	72.075	29.2364	0.529065	0.685131	72.075	22.9242	0.654983	0.572671	57.571	29.3084	0.556424	0.355333
72.278	37.5818	0.683305	0.793778	72.278	28.3727	0.530555	0.664891	72.278	23.7576	0.656828	0.59349	57.733	25.7234	0.55799	0.311869
72.481	36.5545	0.685225	0.77208	72.481	28.2	0.532045	0.660844	72.481	24.5909	0.658673	0.614307	57.895	29.2921	0.559556	0.355135
72.684	38.8091	0.687144	0.8197	72.684	28	0.533535	0.656157	72.684	23.8939	0.660517	0.596895	58.057	27.4988	0.561122	0.333394
72.887	36.5364	0.689063	0.771697	72.887	29.2455	0.535025	0.685344	72.887	22.197	0.662362	0.554505	58.22	29.1066	0.562697	0.352886
73.09	39.1364	0.690982	0.826613	73.09	28.9727	0.536515	0.678952	73.09	24.3333	0.664207	0.607872	58.382	31.4903	0.564263	0.381786
73.293	37.3909	0.692901	0.789746	73.293	29.3818	0.538005	0.688539	73.293	23.0606	0.666052	0.576079	58.544	33.7624	0.565828	0.409333
73.496	37.7727	0.69482	0.79781	73.496	28.8091	0.539495	0.675118	73.496	23.5303	0.667897	0.587812	58.706	24.9142	0.567394	0.302058
73.699	37.9273	0.696739	0.801075	73.699	27.9818	0.540986	0.655731	73.699	24.2576	0.669741	0.605981	58.868	20.1629	0.56896	0.244454
73.902	39.5182	0.698658	0.834677	73.902	27.8727	0.542476	0.653174	73.902	22.4545	0.671586	0.560938	59.03	20.7825	0.570526	0.251966
74.105	39	0.700578	0.823732	74.105	28.8909	0.543966	0.677035	74.105	23.1212	0.673431	0.577592	59.193	24.1957	0.572101	0.293347
74.308	39.1818	0.702497	0.827572	74.308	29.2455	0.545456	0.685344	74.308	23.0455	0.675276	0.575701	59.355	26.4559	0.573667	0.32075
74.511	40.0273	0.704416	0.84543	74.511	29.2545	0.546946	0.685555	74.511	24.0606	0.67712	0.60106	59.517	25.0956	0.575232	0.304257
74.714	41.4545	0.706335	0.875574	74.714	29.8545	0.548436	0.699616	74.714	23.5909	0.678965	0.589326	59.679	25.7642	0.576798	0.312363
74.917	39.3273	0.708254	0.830645	74.917	29.3273	0.549926	0.687261	74.917	23.4697	0.68081	0.586298	59.841	21.8455	0.578364	0.264853
75.12	40.0636	0.710173	0.846197	75.12	29.5636	0.551416	0.692799	75.12	23.3182	0.682655	0.582514	60.004	17.9963	0.579939	0.218186
75.323	40.4182	0.712092	0.853686	75.323	29.3727	0.552906	0.688325	75.323	22.3485	0.684499	0.55829	60.166	15.5533	0.581505	0.188567
75.526	39.4091	0.714012	0.832373	75.526	30.1455	0.554397	0.706435	75.526	23.2879	0.686344	0.581757	60.328	16.6836	0.583071	0.202271
75.729	38.9273	0.715931	0.822196	75.729	30.4545	0.555887	0.713676	75.729	23.6061	0.688189	0.589706	60.49	15.9845	0.584636	0.193795
75.932	38.6545	0.71785	0.816435	75.932	30.6182	0.557377	0.717513	75.932	23.6364	0.690034	0.590463	60.652	19.61	0.586202	0.23775
76.135	39.1818	0.719769	0.827572	76.135	30.8091	0.558867	0.721986	76.135	23.3636	0.691878	0.583648	60.814	21.1456	0.587768	0.256368
76.338	37.8455	0.721688	0.799347	76.338	29.5727	0.560357	0.693012	76.338	24.0152	0.693723	0.599926	60.977	28.6924	0.589343	0.347865
76.541	37.9455	0.723607	0.801459	76.541	28.2455	0.561847	0.66191	76.541	23.5606	0.695568	0.588569	61.139	22.7025	0.590909	0.275244
76.744	37.3273	0.725526	0.788402	76.744	28.0636	0.563337	0.657648	76.744	24.7424	0.697413	0.618092	61.301	26.0526	0.592475	0.31586
76.947	37.4	0.727445	0.789938	76.947	28.8909	0.564827	0.677035	76.947	24.4545	0.699258	0.6109	61.463	30.87	0.594041	0.374266
77.15	38.8636	0.729365	0.820851	77.15	29.2091	0.566318	0.684491	77.15	22.8485	0.701102	0.57078	61.625	26.9719	0.595606	0.327005
77.353	38.5818	0.731284	0.814899	77.353	28.4909	0.567808	0.667661	77.353	23.4848	0.702947	0.586676	61.787	26.4717	0.597172	0.320941
77.556	37.5182	0.733203	0.792434	77.556	28.5182	0.569298	0.668301	77.556	24.0606	0.704792	0.60106	61.95	27.1559	0.598747	0.329236
77.759	36.7818	0.735122	0.776881	77.759	28.9818	0.570788	0.679165	77.759	24.6364	0.706637	0.615444	62.112	27.2659	0.600313	0.33057
77.962	37.8455	0.737041	0.799347	77.962	30.1636	0.572278	0.706859	77.962	25.4848	0.708481	0.636638	62.274	28.5987	0.601879	0.346729
78.165	36.6455	0.73896	0.774002	78.165	29.7364	0.573768	0.696848	78.165	23.8182	0.710326	0.595004	62.436	26.6278	0.603445	0.322834
78.368	36.3636	0.740879	0.768048	78.368	29.5636	0.575258	0.692799	78.368	24.6212	0.712171	0.615064	62.598	21.4061	0.60501	0.259526
78.571	36.5091	0.742799	0.771121	78.571	29.6182	0.576748	0.694078	78.571	23.3485	0.714016	0.583271	62.76	26	0.606576	0.315222
78.774	35.7	0.744718	0.754032	78.774	30.1364	0.578238	0.706222	78.774	24.0909	0.71586	0.601817	62.923	27.5619	0.608151	0.334159
78.977	36.1909	0.746637	0.7644	78.977	30.7273	0.579729	0.720069	78.977	23.197	0.717705	0.579486	63.085	27.3818	0.609717	0.331975
79.181	36.4	0.748565	0.768816	79.181	31.2818	0.581226	0.733064	79.181	24.8636	0.719559	0.62112	63.247	24.7201	0.611283	0.299705
79.384	36.8727	0.750485	0.778801	79.384	31.1818	0.582716	0.73072	79.384	24.1364	0.721404	0.602953	63.409	24.9813	0.612849	0.302872
79.587	37.6818	0.752404	0.79589	79.587	31.0091	0.584206	0.726673	79.587	23.2879	0.723249	0.581757	63.571	19.0393	0.614414	0.230831
79.79	39.5727	0.754323	0.835828	79.79	31.5	0.585696	0.738177	79.79	25.1667	0.725093	0.628691	63.733	24.9491	0.61598	0.302481
79.993	40.6909	0.756242	0.859446	79.993	31.5091	0.587186	0.73839	79.993	25.0909	0.726938	0.626798	63.896	21.7771	0.617556	0.264024
80.196	41.3182	0.758161	0.872695	80.196	31.2	0.588677	0.731147	80.196	25.9848	0.728783	0.649128	64.058	23.995	0.619121	0.290914
80.399	40.0545	0.76008	0.846004	80.399	30.6727	0.590167	0.71879	80.399	24.6212	0.730628	0.615064	64.22	19.8347	0.620687	0.240475
80.602	39.1364	0.761999	0.826613	80.602	29.6364	0.591657	0.694505	80.602	24.9394	0.732472	0.623013	64.382	18.0399	0.622253	0.218714
80.805	38.1	0.763918	0.804723	80.805	29.4818	0.593147	0.690882	80.805	24.3333	0.734317	0.607872	64.544	19.4996	0.623818	0.236412
81.008	39.1909	0.765838	0.827764	81.008	29.4	0.594637	0.688965	81.008	25.0909	0.736162	0.626798	64.706	17.8505	0.625384	0.216418
81.211	39.4909	0.767757	0.8341	81.211	29.3636	0.596127	0.688112	81.211	25.4091	0.738007	0.634747	64.869	20.3926	0.62696	0.247238
81.414	39.9273	0.769676	0.843318	81.414	30.1	0.597617	0.705369	81.414	26.4848	0.739852	0.661619	65.031	19.2844	0.628525	0.233803
81.617	38.6727	0.771595	0.816819	81.617	30.1182	0.599107	0.705796	81.617	26.2273	0.741696	0.655186	65.193	15.723	0.630091	0.190625
81.82	38.7818	0.773514	0.819123	81.82	29.5364	0.600598	0.692161	81.82	26.7576	0.743541	0.668434	65.355	22.4016	0.631657	0.271595
82.023	39.0636	0.775433	0.825075	82.023	30.1818	0.602088	0.707286	82.023	26.5606	0.745386	0.663512	65.517	22.92	0.633223	0.27788
82.226	40.4091	0.777352	0.853494	82.226	29.4273	0.603578	0.689605	82.226	25.5152	0.747231	0.637397	65.68	22.3122	0.634798	0.270512
82.429	40.3818	0.779271	0.852917	82.429	28.6909	0.605068	0.672348	82.429	26.697	0.749075	0.66692	65.842	25.0579	0.636364	0.3038
82.632	41.8636	0.781191	0.884215	82.632	30.1273	0.606558	0.706009	82.632	26.0152	0.75092	0.649888	66.004	21.7967	0.637929	0.264262
82.835	41.7273	0.78311	0.881336	82.835	29.7818	0.608048	0.697912	82.835	25.5758	0.752765	0.638911	66.166	19.2409	0.639495	0.233275
83.038	41.3273	0.785029	0.872888	83.038	29.6364	0.609538	0.694505	83.038	25.1061	0.75461	0.627177	66.328	22.8315	0.641061	0.276808
83.241	42.6909	0.786948	0.901689	83.241	29.9455	0.611028	0.701748	83.241	24.6061	0.756454	0.614687	66.49	23.6636	0.642627	0.286896
83.444	42.2545	0.788867	0.892471	83.444	29.4091	0.612518	0.689178	83.444	25.3485	0.758299	0.633233	66.653	22.4003	0.644202	0.27158
83.647	42.4364	0.790786	0.896313	83.647	29.0364	0.614009	0.680444	83.647	25.5152	0.760144	0.637397	66.815	19.0677	0.645768	0.231175
83.85	41.9636	0.792705	0.886327	83.85	28.3818	0.615499	0.665104	83.85	26.5758	0.761989	0.663892	66.977	16.8088	0.647333	0.203789
84.053	42.2818	0.794625	0.893048	84.053	29.0364	0.616989	0.680444	84.053	25.9848	0.763833	0.649128	67.139	14.5514	0.648899	0.17642
84.256	40.9455	0.796544	0.864823	84.256	29.4636	0.618479	0.690455	84.256	26.2121	0.765678	0.654806	67.301	13.7959	0.650465	0.167261
84.459	42.8818	0.798463	0.905721	84.459	29.2	0.619969	0.684278	84.459	25.6818	0.767523	0.641559	67.463	14.8476	0.652031	0.180011
84.662	42.8909	0.800382	0.905913	84.662	30.0182	0.621459	0.703452	84.662	25.303	0.769368	0.632096	67.626	19.9618	0.653606	0.242015
84.865	42.9273	0.802301	0.906682	84.865	29.4545	0.622949	0.690242	84.865	26.2121	0.771213	0.654806	67.788	18.4566	0.655172	0.223767
85.068	41.8727	0.80422	0.884407	85.068	29.5909	0.624439	0.693439	85.068	24.8636	0.773057	0.62112	67.95	22.1485	0.656737	0.268527
85.271	42.9727	0.806139	0.907641	85.271	29.2818	0.625929	0.686195	85.271	24.7879	0.774902	0.619228	68.112	20.4013	0.658303	0.247344
85.474	43.2091	0.808058	0.912634	85.474	28.9545	0.62742	0.678525	85.474	24.2727	0.776747	0.606358	68.274	20.9527	0.659869	0.254029
85.677	42.4364	0.809978	0.896313	85.677	28.1818	0.62891	0.660418	85.677	24.5606	0.778592	0.61355	68.436	17.9373	0.661435	0.217471
85.88	43.3636	0.811897	0.915897	85.88	28.5364	0.6304	0.668727	85.88	24.197	0.780436	0.604467	68.599	17.3575	0.66301	0.210441
86.083	43.0545	0.813816	0.909368	86.083	28.6455	0.63189	0.671284	86.083	24.7576	0.782281	0.618472	68.761	16.2021	0.664576	0.196433
86.286	42.3727	0.815735	0.894968	86.286	28.3273	0.63338	0.663827	86.286	25.6364	0.784126	0.640425	68.923	17.551	0.666142	0.212787
86.489	43.9909	0.817654	0.929146	86.489	27.6091	0.63487	0.646997	86.489	24.5758	0.785971	0.61393	69.085	19.0109	0.667707	0.230487
86.693	43.2727	0.819583	0.913977	86.693	27.1364	0.636368	0.635919	86.693	25.9545	0.787825	0.648371	69.247	25.8011	0.669273	0.312811
86.896	43.0182	0.821502	0.908602	86.896	27.3909	0.637858	0.641883	86.896	24.8182	0.789669	0.619985	69.409	21.6872	0.670839	0.262934
87.099	44.3545	0.823421	0.936826	87.099	28.4273	0.639348	0.666171	87.099	26.1667	0.791514	0.653672	69.572	14.7872	0.672414	0.179279
87.302	43.5545	0.82534	0.919929	87.302	27.3	0.640838	0.639753	87.302	24.9394	0.793359	0.623013	69.734	12.3737	0.67398	0.150018
87.505	43.9636	0.827259	0.92857	87.505	27.7182	0.642328	0.649553	87.505	27	0.795204	0.674489	69.896	15.5476	0.675546	0.188498
87.708	44.9182	0.829178	0.948732	87.708	27.3909	0.643818	0.641883	87.708	26.0152	0.797048	0.649888	70.058	26.0446	0.677111	0.315763
87.911	45.1545	0.831097	0.953723	87.911	27.0545	0.645308	0.634	87.911	25.9091	0.798893	0.647237	70.22	19.7185	0.678677	0.239066
88.114	43.8545	0.833017	0.926265	88.114	27.4909	0.646798	0.644227	88.114	25.7424	0.800738	0.643073	70.382	21.19	0.680243	0.256906
88.317	43.9364	0.834936	0.927995	88.317	27.8909	0.648289	0.653601	88.317	25.1667	0.802583	0.628691	70.545	20.9587	0.681818	0.254102
88.52	44.5818	0.836855	0.941627	88.52	27.3091	0.649779	0.639967	88.52	24.7424	0.804427	0.618092	70.707	14.7299	0.683384	0.178584
88.723	44.2727	0.838774	0.935098	88.723	27.3818	0.651269	0.64167	88.723	24.2121	0.806272	0.604844	70.869	11.7599	0.68495	0.142576
88.926	45	0.840693	0.95046	88.926	27.8182	0.652759	0.651897	88.926	24.9242	0.808117	0.622633	71.031	15.748	0.686515	0.190928
89.129	44.8455	0.842612	0.947197	89.129	26.7545	0.654249	0.62697	89.129	25.0455	0.809962	0.625664	71.193	12.0405	0.688081	0.145978
89.332	44.2455	0.844531	0.934524	89.332	27.9636	0.655739	0.655304	89.332	24	0.811807	0.599546	71.356	14.1403	0.689657	0.171436
89.535	43.4273	0.846451	0.917242	89.535	27.3545	0.657229	0.64103	89.535	24	0.813651	0.599546	71.518	12.1565	0.691222	0.147385
89.738	43.9091	0.84837	0.927419	89.738	27.0455	0.658719	0.633789	89.738	23.8939	0.815496	0.596895	71.68	13.5183	0.692788	0.163895
89.941	45.5	0.850289	0.961021	89.941	28.0182	0.660209	0.656584	89.941	25.6212	0.817341	0.640045	71.842	14.3955	0.694354	0.17453
90.144	44.2636	0.852208	0.934906	90.144	27.6818	0.6617	0.6487	90.144	24.5606	0.819186	0.61355	72.004	13.3542	0.695919	0.161905
90.347	45.3545	0.854127	0.957947	90.347	27.4545	0.66319	0.643374	90.347	26.0909	0.82103	0.651779	72.166	12.8728	0.697485	0.156069
90.55	44.8636	0.856046	0.947579	90.55	27.2091	0.66468	0.637623	90.55	25.4545	0.822875	0.635881	72.329	15.2103	0.699061	0.184409
90.753	43.3909	0.857965	0.916474	90.753	27.8364	0.66617	0.652323	90.753	24.4848	0.82472	0.611657	72.491	16.0616	0.700626	0.19473
90.956	44.3182	0.859884	0.936059	90.956	27.4	0.66766	0.642097	90.956	25.9848	0.826565	0.649128	72.653	18.4103	0.702192	0.223205
91.159	43.7	0.861804	0.923002	91.159	28.9636	0.66915	0.678738	91.159	25.0455	0.828409	0.625664	72.815	13.9137	0.703758	0.168689
91.362	43.9636	0.863723	0.92857	91.362	28.5091	0.67064	0.668088	91.362	24.5152	0.830254	0.612416	72.977	11.8372	0.705323	0.143513
91.565	43.6818	0.865642	0.922618	91.565	27.8091	0.67213	0.651684	91.565	24.5152	0.832099	0.612416	73.139	12.5767	0.706889	0.152479
91.768	44.9727	0.867561	0.949883	91.768	27.7273	0.673621	0.649767	91.768	24.6667	0.833944	0.616201	73.302	10.5948	0.708465	0.128451
91.971	43.8545	0.86948	0.926265	91.971	28.1273	0.675111	0.65914	91.971	25.2273	0.835788	0.630205	73.464	14.2458	0.71003	0.172715
92.174	45.1909	0.871399	0.954492	92.174	27.8	0.676601	0.65147	92.174	26.3333	0.837633	0.657834	73.626	13.5146	0.711596	0.16385
92.377	45.8273	0.873318	0.967934	92.377	28.2727	0.678091	0.662548	92.377	26.2576	0.839478	0.655943	73.788	11.7141	0.713162	0.142021
92.58	44.6273	0.875238	0.942588	92.58	29.9182	0.679581	0.701109	92.58	25.7879	0.841323	0.64421	73.95	13.5566	0.714728	0.164359
92.783	43.6909	0.877157	0.92281	92.783	29.9636	0.681071	0.702173	92.783	25.3939	0.843168	0.634367	74.112	12.0851	0.716293	0.146519
92.986	44.9182	0.879076	0.948732	92.986	29.5273	0.682561	0.691948	92.986	26.1667	0.845012	0.653672	74.275	9.4574	0.717869	0.114661
93.189	44.6273	0.880995	0.942588	93.189	29.3273	0.684051	0.687261	93.189	26.5455	0.846857	0.663135	74.437	14.1988	0.719434	0.172145
93.392	43.4182	0.882914	0.91705	93.392	29.6545	0.685541	0.694929	93.392	26.7576	0.848702	0.668434	74.599	13.5692	0.721	0.164512
93.595	43.9455	0.884833	0.928187	93.595	29.5273	0.687032	0.691948	93.595	27.0606	0.850547	0.676003	74.761	15.7438	0.722566	0.190877
93.798	44.2182	0.886752	0.933947	93.798	29.3091	0.688522	0.686835	93.798	26.0606	0.852391	0.651022	74.923	16.0939	0.724132	0.195121
94.001	44.4273	0.888671	0.938364	94.001	29.3364	0.690012	0.687475	94.001	26.0606	0.854236	0.651022	75.085	16.2113	0.725697	0.196545
94.205	44.3818	0.8906	0.937403	94.205	30	0.691509	0.703026	94.205	26.8333	0.85609	0.670325	75.248	19.1488	0.727273	0.232159
94.408	44.0091	0.892519	0.929531	94.408	29.7455	0.692999	0.697062	94.408	28.3939	0.857935	0.70931	75.41	21.1926	0.728838	0.256938
94.611	43.6909	0.894438	0.92281	94.611	28.8091	0.69449	0.675118	94.611	27.6515	0.85978	0.690764	75.572	30.755	0.730404	0.372871
94.814	44.3636	0.896357	0.937018	94.814	29.0818	0.69598	0.681508	94.814	28.0303	0.861624	0.700227	75.734	33.5937	0.73197	0.407288
95.017	46.3182	0.898277	0.978302	95.017	29.1	0.69747	0.681935	95.017	26.9848	0.863469	0.674109	75.896	36.3837	0.733536	0.441113
95.22	45.9818	0.900196	0.971197	95.22	28.7636	0.69896	0.674052	95.22	28.1515	0.865314	0.703255	76.059	37.2479	0.735111	0.451591
95.423	47.3455	0.902115	1	95.423	28.9727	0.70045	0.678952	95.423	28.6667	0.867159	0.716125	76.221	40.2163	0.736677	0.48758
95.626	45.2273	0.904034	0.955261	95.626	29.9818	0.70194	0.702599	95.626	27.4091	0.869003	0.684709	76.383	33.5084	0.738243	0.406254
95.829	45.8545	0.905953	0.968508	95.829	29.2455	0.70343	0.685344	95.829	28.6515	0.870848	0.715745	76.545	26.1739	0.739808	0.317331
96.032	44.4182	0.907872	0.938172	96.032	29.6273	0.70492	0.694292	96.032	28.5	0.872693	0.711961	76.707	19.0071	0.741374	0.230441
96.235	43.5636	0.909791	0.920121	96.235	28.1364	0.70641	0.659354	96.235	28.5758	0.874538	0.713854	76.869	17.3542	0.74294	0.210401
96.438	45.3091	0.91171	0.956989	96.438	28.8545	0.707901	0.676182	96.438	29.4242	0.876382	0.735048	77.032	17.1223	0.744515	0.20759
96.641	46.1273	0.91363	0.97427	96.641	27.8	0.709391	0.65147	96.641	30.4394	0.878227	0.760409	77.194	17.3389	0.746081	0.210216
96.844	44.5909	0.915549	0.941819	96.844	27.2091	0.710881	0.637623	96.844	31.1364	0.880072	0.777821	77.356	16.216	0.747647	0.196602
97.047	44.0909	0.917468	0.931259	97.047	27.9545	0.712371	0.655091	97.047	30.8788	0.881917	0.771386	77.518	19.5113	0.749212	0.236554
97.25	44.9273	0.919387	0.948924	97.25	28.1636	0.713861	0.659991	97.25	30.8182	0.883762	0.769872	77.68	25.0913	0.750778	0.304205
97.453	44.2364	0.921306	0.934332	97.453	28	0.715351	0.656157	97.453	29.8636	0.885606	0.746025	77.842	19.2596	0.752344	0.233502
97.656	47.0818	0.923225	0.99443	97.656	27.8364	0.716841	0.652323	97.656	32.4394	0.887451	0.810371	78.005	17.0266	0.753919	0.206429
97.859	46.3364	0.925144	0.978686	97.859	28.7909	0.718331	0.674691	97.859	32.4697	0.889296	0.811128	78.167	13.3218	0.755485	0.161513
98.062	46.9818	0.927064	0.992318	98.062	29.4909	0.719821	0.691095	98.062	31.8939	0.891141	0.796744	78.329	15.8578	0.757051	0.192259
98.265	45.0364	0.928983	0.951229	98.265	29.4364	0.721312	0.689818	98.265	30.9394	0.892985	0.7729	78.491	17.396	0.758616	0.210908
98.468	45.1636	0.930902	0.953915	98.468	28.6455	0.722802	0.671284	98.468	31.1515	0.89483	0.778198	78.653	22.3791	0.760182	0.271323
98.671	45.6818	0.932821	0.96486	98.671	28.3909	0.724292	0.665318	98.671	32.8636	0.896675	0.820968	78.815	23.3199	0.761748	0.282729
98.874	45.9091	0.93474	0.969661	98.874	27.9273	0.725782	0.654454	98.874	34.8939	0.89852	0.871687	78.978	21.9373	0.763323	0.265966
99.077	45.8818	0.936659	0.969085	99.077	27.9364	0.727272	0.654667	99.077	33.5303	0.900364	0.837623	79.14	21.4565	0.764889	0.260137
99.28	46.0273	0.938578	0.972158	99.28	28.3909	0.728762	0.665318	99.28	35.7273	0.902209	0.892506	79.302	29.304	0.766455	0.35528
99.483	44.4455	0.940497	0.938748	99.483	28.3909	0.730252	0.665318	99.483	36.7121	0.904054	0.917108	79.464	26.1053	0.76802	0.316499
99.686	46.1727	0.942417	0.975229	99.686	28.3364	0.731742	0.66404	99.686	36.8182	0.905899	0.919758	79.626	19.3894	0.769586	0.235076
99.889	43.9909	0.944336	0.929146	99.889	28.7909	0.733233	0.674691	99.889	37.2121	0.907743	0.929598	79.788	21.8656	0.771152	0.265097
100.092	45.3455	0.946255	0.957757	100.092	29.1	0.734723	0.681935	100.092	36.1667	0.909588	0.903483	79.951	23.7851	0.772727	0.288369
100.295	45.7818	0.948174	0.966973	100.295	28.5455	0.736213	0.668941	100.295	34.2727	0.911433	0.856169	80.113	20.9043	0.774293	0.253442
100.498	44.9727	0.950093	0.949883	100.498	28.9091	0.737703	0.677461	100.498	36.2273	0.913278	0.904997	80.275	24.5838	0.775859	0.298052
100.701	44.8182	0.952012	0.94662	100.701	29.7	0.739193	0.695995	100.701	35.6212	0.915123	0.889856	80.437	21.2105	0.777424	0.257155
100.904	43.7818	0.953931	0.92473	100.904	28.9636	0.740683	0.678738	100.904	35.6212	0.916967	0.889856	80.599	21.8213	0.77899	0.26456
101.107	42.5818	0.955851	0.899384	101.107	29.5909	0.742173	0.693439	101.107	35.2121	0.918812	0.879636	80.761	25.6807	0.780556	0.311351
101.31	45.0091	0.95777	0.950652	101.31	28.8636	0.743663	0.676395	101.31	34.9091	0.920657	0.872067	80.924	26.0516	0.782131	0.315848
101.513	44.7818	0.959689	0.945851	101.513	28.9727	0.745153	0.678952	101.513	34.0152	0.922502	0.849736	81.086	24.5661	0.783697	0.297838
101.717	42.7727	0.961617	0.903416	101.717	29.2818	0.746651	0.686195	101.717	36.303	0.924355	0.906888	81.248	23.4349	0.785263	0.284123
101.92	43.8273	0.963536	0.925691	101.92	29.3636	0.748141	0.688112	101.92	37.1515	0.9262	0.928084	81.41	24.4665	0.786829	0.29663
102.123	43.4545	0.965456	0.917817	102.123	27.8273	0.749631	0.65211	102.123	37.2424	0.928045	0.930355	81.572	32.1666	0.788394	0.389986
102.326	42.4364	0.967375	0.896313	102.326	27.8273	0.751121	0.65211	102.326	37.4545	0.92989	0.935654	81.735	32.933	0.78997	0.399277
102.529	44.0909	0.969294	0.931259	102.529	28.0818	0.752611	0.658074	102.529	37.9091	0.931735	0.94701	81.897	32.723	0.791535	0.396731
102.732	43.2273	0.971213	0.913018	102.732	28.2727	0.754101	0.662548	102.732	37.7273	0.933579	0.942469	82.059	28.3115	0.793101	0.343247
102.935	43.3545	0.973132	0.915705	102.935	28.5182	0.755592	0.668301	102.935	36.3485	0.935424	0.908025	82.221	28.0755	0.794667	0.340385
103.138	42.5818	0.975051	0.899384	103.138	28.3545	0.757082	0.664465	103.138	39.803	0.937269	0.994322	82.383	29.2871	0.796233	0.355075
103.341	41.1455	0.97697	0.869048	103.341	29.0545	0.758572	0.680869	103.341	39.7576	0.939114	0.993188	82.545	29.7726	0.797798	0.360961
103.544	41.0909	0.97889	0.867895	103.544	29.1455	0.760062	0.683001	103.544	39.2424	0.940958	0.980317	82.708	35.8137	0.799374	0.434203
103.747	40.3545	0.980809	0.852341	103.747	28.8	0.761552	0.674905	103.747	39.5455	0.942803	0.987889	82.87	33.0205	0.800939	0.400338
103.95	40.3727	0.982728	0.852725	103.95	29.6727	0.763042	0.695356	103.95	39.8636	0.944648	0.995836	83.032	32.2718	0.802505	0.391261
104.153	39.8364	0.984647	0.841398	104.153	30.5636	0.764532	0.716233	104.153	38.6212	0.946493	0.964799	83.194	28.8959	0.804071	0.350332
104.356	39.7818	0.986566	0.840245	104.356	30.3818	0.766022	0.711973	104.356	40.0303	0.948337	1	83.356	23.6076	0.805637	0.286217
104.559	37.8364	0.988485	0.799155	104.559	30.1	0.767513	0.705369	104.559	38.3636	0.950182	0.958364	83.518	27.3774	0.807202	0.331922
104.762	37.5455	0.990404	0.793011	104.762	30.2	0.769003	0.707712	104.762	39.5909	0.952027	0.989023	83.681	23.4015	0.808778	0.283718
104.965	36.4545	0.992323	0.769968	104.965	29.8455	0.770493	0.699405	104.965	37.7576	0.953872	0.943226	83.843	21.9096	0.810343	0.26563
105.168	35.4545	0.994243	0.748846	105.168	30.0091	0.771983	0.703239	105.168	37.5455	0.955717	0.937927	84.005	21.0688	0.811909	0.255437
105.371	34.4909	0.996162	0.728494	105.371	30.8364	0.773473	0.722626	105.371	39.1212	0.957561	0.97729	84.167	24.3024	0.813475	0.294641
105.574	35.8727	0.998081	0.757679	105.574	30.8364	0.774963	0.722626	105.574	37.8636	0.959406	0.945874	84.329	14.0452	0.815041	0.170283
105.777	35.4909	1	0.749615	105.777	30.3909	0.776453	0.712186	105.777	35.9848	0.961251	0.898939	84.491	14.3629	0.816606	0.174135
				105.98	29.4818	0.777943	0.690882	105.98	36.0758	0.963096	0.901212	84.654	17.0744	0.818182	0.207009
				106.183	29.1545	0.779433	0.683212	106.183	36.7273	0.96494	0.917488	84.816	21.0282	0.819748	0.254944
				106.386	29.3727	0.780924	0.688325	106.386	36	0.966785	0.899319	84.978	24.3196	0.821313	0.294849
				106.589	29.3182	0.782414	0.687048	106.589	35.0606	0.96863	0.875852	85.14	24.3843	0.822879	0.295634
				106.792	29.3182	0.783904	0.687048	106.792	34.3182	0.970475	0.857306	85.302	25.3563	0.824445	0.307418
				106.995	29.7091	0.785394	0.696209	106.995	34.1667	0.972319	0.853521	85.464	28.5639	0.82601	0.346307
				107.198	29.9818	0.786884	0.702599	107.198	34.7576	0.974164	0.868282	85.627	25.1688	0.827586	0.305145
				107.401	29.2545	0.788374	0.685555	107.401	34.0455	0.976009	0.850493	85.789	21.0041	0.829152	0.254652
				107.604	29.2545	0.789864	0.685555	107.604	34.197	0.977854	0.854278	85.951	20.0861	0.830717	0.243522
				107.807	29.3273	0.791354	0.687261	107.807	34.2424	0.979698	0.855412	86.113	21.9184	0.832283	0.265737
				108.01	29.7091	0.792845	0.696209	108.01	33.2727	0.981543	0.831188	86.275	22.8365	0.833849	0.276868
				108.213	28.9636	0.794335	0.678738	108.213	31.803	0.983388	0.794473	86.437	23.0913	0.835415	0.279957
				108.416	29.5273	0.795825	0.691948	108.416	31.1515	0.985233	0.778198	86.6	16.9845	0.83699	0.205919
				108.619	29.8818	0.797315	0.700256	108.619	31.7424	0.987078	0.792959	86.762	20.821	0.838556	0.252432
				108.822	30.3455	0.798805	0.711122	108.822	30.4091	0.988922	0.759652	86.924	20.8889	0.840121	0.253256
				109.025	30.0182	0.800295	0.703452	109.025	31.1667	0.990767	0.778578	87.086	22.6578	0.841687	0.274702
				109.229	30.8091	0.801793	0.721986	109.229	30.9394	0.992621	0.7729	87.248	18.1209	0.843253	0.219697
				109.432	31.3545	0.803283	0.734767	109.432	28.6364	0.994466	0.715368	87.411	16.2818	0.844828	0.197399
				109.635	30.8091	0.804773	0.721986	109.635	27.5606	0.99631	0.688493	87.573	15.3292	0.846394	0.18585
				109.838	29.6909	0.806263	0.695782	109.838	27.9848	0.998155	0.69909	87.735	26.9523	0.84796	0.326768
				110.041	28.9909	0.807753	0.679378	110.041	26.9697	1	0.673732	87.897	26.5718	0.849525	0.322155
				110.244	28.7545	0.809243	0.673838					88.059	22.6753	0.851091	0.274914
				110.447	29.4182	0.810733	0.689392					88.221	21.5046	0.852657	0.26072
				110.65	28.9455	0.812223	0.678314					88.384	24.178	0.854232	0.293132
				110.853	29.2182	0.813713	0.684705					88.546	24.9026	0.855798	0.301917
				111.056	28.9818	0.815204	0.679165					88.708	27.9211	0.857364	0.338513
				111.259	30.7455	0.816694	0.720496					88.87	23.3974	0.85893	0.283668
				111.462	30.7364	0.818184	0.720283					89.032	23.3197	0.860495	0.282726
				111.665	29.0364	0.819674	0.680444					89.194	21.3151	0.862061	0.258423
				111.868	28.6364	0.821164	0.671071					89.357	20.1405	0.863636	0.244182
				112.071	27.7727	0.822654	0.650831					89.519	29.7209	0.865202	0.360334
				112.274	27.9364	0.824144	0.654667					89.681	30.5888	0.866768	0.370856
				112.477	28.5818	0.825634	0.669791					89.843	31.7171	0.868334	0.384536
				112.68	27.8273	0.827125	0.65211					90.005	28.8104	0.869899	0.349295
				112.883	27.3636	0.828615	0.641244					90.167	26.9686	0.871465	0.326965
				113.086	27.1182	0.830105	0.635493					90.33	24.8174	0.87304	0.300884
				113.289	27.3	0.831595	0.639753					90.492	27.0472	0.874606	0.327918
				113.492	27.3455	0.833085	0.64082					90.654	24.5831	0.876172	0.298044
				113.695	27.3727	0.834575	0.641457					90.816	26.3475	0.877738	0.319435
				113.898	28.0909	0.836065	0.658287					90.978	25.8276	0.879303	0.313132
				114.101	27.7182	0.837555	0.649553					91.14	28.3771	0.880869	0.344042
				114.304	28.2091	0.839045	0.661057					91.303	26.9086	0.882444	0.326238
				114.507	28.2091	0.840536	0.661057					91.465	31.0599	0.88401	0.376568
				114.71	27.4455	0.842026	0.643163					91.627	27.9721	0.885576	0.339132
				114.913	28.4636	0.843516	0.667021					91.789	27.6507	0.887142	0.335235
				115.116	28.7636	0.845006	0.674052					91.951	31.5531	0.888707	0.382548
				115.319	29.0273	0.846496	0.680231					92.113	35.7109	0.890273	0.432956
				115.522	28.9909	0.847986	0.679378					92.276	38.6785	0.891849	0.468935
				115.725	29.6818	0.849476	0.695569					92.438	37.5912	0.893414	0.455753
				115.928	29.8091	0.850966	0.698552					92.6	39.4995	0.89498	0.478889
				116.131	29.7364	0.852456	0.696848					92.762	35.3199	0.896546	0.428216
				116.334	29.3455	0.853947	0.687688					92.924	35.2167	0.898111	0.426965
				116.537	27.9909	0.855437	0.655944					93.087	36.8171	0.899687	0.446368
				116.741	28.4727	0.856934	0.667235					93.249	35.5405	0.901253	0.430891
				116.944	29.4364	0.858424	0.689818					93.411	43.197	0.902818	0.523717
				117.147	29.0636	0.859914	0.681082					93.573	30.9731	0.904384	0.375516
				117.35	28.8	0.861405	0.674905					93.735	30.6129	0.90595	0.371149
				117.553	28	0.862895	0.656157					93.897	22.9836	0.907516	0.278652
				117.756	27.3727	0.864385	0.641457					94.06	28.1901	0.909091	0.341775
				117.959	28.0636	0.865875	0.657648					94.222	30.646	0.910657	0.37155
				118.162	28.6727	0.867365	0.671921					94.384	21.2454	0.912222	0.257578
				118.365	28.4364	0.868855	0.666384					94.546	26.5375	0.913788	0.321739
				118.568	27.4909	0.870345	0.644227					94.708	25.9967	0.915354	0.315182
				118.771	27.3545	0.871835	0.64103					94.87	26.2619	0.91692	0.318397
				118.974	27.6273	0.873325	0.647423					95.033	28.8573	0.918495	0.349864
				119.177	28.0909	0.874816	0.658287					95.195	30.3558	0.920061	0.368032
				119.38	28.2364	0.876306	0.661697					95.357	30.6834	0.921626	0.372003
				119.583	27.7091	0.877796	0.64934					95.519	31.5512	0.923192	0.382525
				119.786	27.6091	0.879286	0.646997					95.681	32.8417	0.924758	0.39817
				119.989	28.3727	0.880776	0.664891					95.843	31.4627	0.926324	0.381452
				120.192	28.4091	0.882266	0.665744					96.006	29.1342	0.927899	0.353221
				120.395	28.1	0.883756	0.658501					96.168	39.4674	0.929465	0.4785
				120.598	28.1273	0.885246	0.65914					96.33	47.8775	0.93103	0.580463
				120.801	28.5182	0.886736	0.668301					96.492	47.7737	0.932596	0.579205
				121.004	28.3	0.888227	0.663187					96.654	40.162	0.934162	0.486921
				121.207	28.0818	0.889717	0.658074					96.816	28.4926	0.935728	0.345442
				121.41	27.5545	0.891207	0.645717					96.979	35.9175	0.937303	0.435461
				121.613	26.9	0.892697	0.63038					97.141	32.1895	0.938869	0.390263
				121.816	27.5455	0.894187	0.645506					97.303	33.8154	0.940435	0.409976
				122.019	27.7	0.895677	0.649127					97.465	37.1452	0.942	0.450346
				122.222	27.3636	0.897167	0.641244					97.627	50.0001	0.943566	0.606198
				122.425	27.9091	0.898657	0.654027					97.79	45.262	0.945141	0.548753
				122.628	28.2	0.900148	0.660844					97.952	50.7697	0.946707	0.615528
				122.831	27.4818	0.901638	0.644014					98.114	52.7776	0.948273	0.639872
				123.034	26.9909	0.903128	0.63251					98.276	49.472	0.949839	0.599795
				123.237	26.5909	0.904618	0.623136					98.438	53.1379	0.951404	0.64424
				123.44	26.4727	0.906108	0.620366					98.6	45.8566	0.95297	0.555962
				123.643	26.5364	0.907598	0.621859					98.763	37.314	0.954545	0.452392
				123.846	27.0818	0.909088	0.63464					98.925	39.2421	0.956111	0.475769
				124.049	28.6182	0.910578	0.670644					99.087	48.2405	0.957677	0.584864
				124.253	28.5545	0.912076	0.669151					99.249	55.2245	0.959243	0.669538
				124.456	28.4455	0.913566	0.666597					99.411	48.284	0.960808	0.585392
				124.659	28.6091	0.915056	0.670431					99.573	42.3945	0.962374	0.513988
				124.862	29.0909	0.916546	0.681722					99.736	42.5485	0.96395	0.515855
				125.065	29.3636	0.918036	0.688112					99.898	46.8704	0.965515	0.568253
				125.268	29.1455	0.919526	0.683001					100.06	56.2979	0.967081	0.682552
				125.471	28.9727	0.921017	0.678952					100.222	60.6481	0.968647	0.735293
				125.674	28.3909	0.922507	0.665318					100.384	57.6253	0.970212	0.698645
				125.877	28.1273	0.923997	0.65914					100.546	56.4817	0.971778	0.68478
				126.08	28.0091	0.925487	0.65637					100.709	56.3326	0.973354	0.682973
				126.283	29.2364	0.926977	0.685131					100.871	57.2931	0.974919	0.694618
				126.486	29.4091	0.928467	0.689178					101.033	65.4917	0.976485	0.794017
				126.689	29.6182	0.929957	0.694078					101.195	60.1125	0.978051	0.7288
				126.892	29.5091	0.931447	0.691522					101.357	64.2978	0.979616	0.779542
				127.095	29.2	0.932937	0.684278					101.519	73.7757	0.981182	0.894451
				127.298	29.4545	0.934428	0.690242					101.682	74.5065	0.982758	0.903312
				127.501	29.3455	0.935918	0.687688					101.844	69.3902	0.984323	0.841282
				127.704	28.7545	0.937408	0.673838					102.006	70.5731	0.985889	0.855623
				127.907	29.4	0.938898	0.688965					102.168	81.6149	0.987455	0.989493
				128.11	29.7727	0.940388	0.697699					102.33	80.3074	0.989021	0.973641
				128.313	28.4273	0.941878	0.666171					102.492	70.9349	0.990586	0.86001
				128.516	28.1818	0.943368	0.660418					102.655	82.4815	0.992162	1
				128.719	29.0455	0.944858	0.680658					102.817	67.0205	0.993727	0.812552
				128.922	28.2727	0.946348	0.662548					102.979	57.6903	0.995293	0.699433
				129.125	28.4545	0.947839	0.666808					103.141	47.5986	0.996859	0.577082
				129.328	28.2909	0.949329	0.662974					103.303	35.475	0.998425	0.430096
				129.531	28.9727	0.950819	0.678952					103.466	29	1	0.351594
				129.734	29.7909	0.952309	0.698125
				129.937	29.9818	0.953799	0.702599
				130.14	30.5	0.955289	0.714743
				130.343	30.5455	0.956779	0.715809
				130.546	29.9	0.958269	0.700682
				130.749	31.1364	0.95976	0.729656
				130.952	32.4182	0.96125	0.759694
				131.155	32.6818	0.96274	0.765871
				131.358	34.0182	0.96423	0.797189
				131.561	35.2455	0.96572	0.82595
				131.765	36.5636	0.967217	0.856838
				131.968	37.9182	0.968708	0.888582
				132.171	38.1091	0.970198	0.893056
				132.374	39.5364	0.971688	0.926503
				132.577	41.1545	0.973178	0.964422
				132.78	41.8364	0.974668	0.980402
				132.983	42.3364	0.976158	0.992119
				133.186	42.6727	0.977648	1
				133.389	42.5455	0.979138	0.997019
				133.592	42.0273	0.980628	0.984876
				133.795	41.2909	0.982119	0.967619
				133.998	40.9636	0.983609	0.959949
				134.201	39.3182	0.985099	0.92139
				134.404	38.8636	0.986589	0.910737
				134.607	38.4273	0.988079	0.900513
				134.81	37.8909	0.989569	0.887942
				135.013	37.4545	0.991059	0.877716
				135.216	36.2	0.992549	0.848318
				135.419	34.4364	0.99404	0.806989
				135.622	34.4909	0.99553	0.808266
				135.825	34.1455	0.99702	0.800172
				136.028	33.4727	0.99851	0.784405
				136.231	32.7364	1	0.767151

## Sheet: 2-cells
1				2				3
X	Y			X	Y			X	Y
0	36	0	0.606412	0	13	0	0.108985	0	21	0	0.387407
0.149	36.0756	0.00135359	0.607685	0.208	13.367	0.00126526	0.112062	0.1259	23.8743	0.00226324	0.440432
0.297	43.5129	0.00269809	0.732965	0.415	10.287	0.00252444	0.086241	0.2517	22.8584	0.00452468	0.42169
0.446	33.9408	0.00405167	0.571725	0.623	16.189	0.0037897	0.13572	0.3776	27.6113	0.00678791	0.509372
0.594	28.721	0.00539617	0.483799	0.83	22.96	0.00504888	0.192485	0.5034	27.1252	0.00904935	0.500404
0.743	34.5858	0.00674976	0.58259	1.038	23.885	0.00631414	0.20024	0.6293	24.3522	0.0113126	0.449248
0.891	36.7923	0.00809426	0.619758	1.245	19.223	0.00757332	0.161156	0.7551	25.6169	0.013574	0.472579
1.04	38.0446	0.00944785	0.640853	1.453	17.247	0.00883858	0.14459	0.881	21.4734	0.0158373	0.39614
1.188	37.8737	0.0107923	0.637974	1.661	31.281	0.0101038	0.262244	1.0068	21.5826	0.0180987	0.398154
1.337	41.7032	0.0121459	0.702481	1.868	21.495	0.011363	0.180203	1.1327	21.6709	0.0203619	0.399783
1.486	42.6851	0.0134995	0.719021	2.076	22.992	0.0126283	0.192753	1.2586	27.2113	0.0226252	0.501992
1.634	43.4708	0.014844	0.732256	2.283	23.669	0.0138875	0.198429	1.3844	17.0376	0.0248866	0.314309
1.783	40.626	0.0161976	0.684336	2.491	21.926	0.0151527	0.183817	1.5103	19.2716	0.0271498	0.355521
1.931	35.4035	0.0175421	0.596364	2.698	27.348	0.0164119	0.229272	1.6361	16.0035	0.0294113	0.295232
2.08	40.7103	0.0188957	0.685756	2.906	31.231	0.0176772	0.261825	1.762	14.0586	0.0316745	0.259352
2.228	43.0483	0.0202402	0.725139	3.113	29.086	0.0189363	0.243842	1.8878	14.5274	0.033936	0.268001
2.377	38.2741	0.0215938	0.644718	3.321	20.508	0.0202016	0.171929	2.0137	16.7457	0.0361992	0.308924
2.525	36.3314	0.0229383	0.611994	3.529	21.14	0.0214669	0.177227	2.1395	15.1479	0.0384606	0.279448
2.674	40.0445	0.0242919	0.67454	3.736	30.829	0.022726	0.258455	2.2654	19.9967	0.0407239	0.368898
2.823	42.3018	0.0256455	0.712564	3.944	39.586	0.0239913	0.331869	2.3913	20.0457	0.0429871	0.369802
2.971	39.6078	0.02699	0.667184	4.151	33.259	0.0252505	0.278827	2.5171	17.3111	0.0452486	0.319354
3.12	37.8187	0.0283435	0.637047	4.359	29.31	0.0265157	0.24572	2.643	17.6013	0.0475118	0.324708
3.268	37.9372	0.029688	0.639043	4.566	23.765	0.0277749	0.199234	2.7688	20.6273	0.0497732	0.380531
3.417	36.9112	0.0310416	0.621761	4.774	26.002	0.0290402	0.217988	2.8947	19.8185	0.0520365	0.36561
3.565	41.4425	0.0323861	0.698089	4.982	28.075	0.0303054	0.235367	3.0205	15.8283	0.0542979	0.291999
3.714	39.6998	0.0337397	0.668734	5.189	29.249	0.0315646	0.245209	3.1464	16.328	0.0565611	0.301218
3.862	42	0.0350842	0.70748	5.397	29.254	0.0328299	0.245251	3.2723	19.5952	0.0588244	0.361491
4.011	40.9636	0.0364378	0.690023	5.604	33.514	0.034089	0.280964	3.3981	16.3176	0.0610858	0.301026
4.159	38.6289	0.0377823	0.650695	5.812	32.097	0.0353543	0.269085	3.524	15.789	0.0633491	0.291274
4.308	37.6084	0.0391359	0.633505	6.019	40.997	0.0366135	0.343698	3.6498	20.1336	0.0656105	0.371423
4.457	37.4497	0.0404895	0.630832	6.227	43.427	0.0378787	0.36407	3.7757	23.6904	0.0678737	0.437039
4.605	35.258	0.041834	0.593913	6.435	48.969	0.039144	0.410531	3.9015	20.5333	0.0701352	0.378797
4.754	31.6766	0.0431876	0.533585	6.642	31.361	0.0404032	0.262915	4.0274	19.4645	0.0723984	0.35908
4.902	34.2893	0.0445321	0.577595	6.85	29.565	0.0416684	0.247858	4.1532	19.7136	0.0746598	0.363675
5.051	36.6177	0.0458856	0.616817	7.057	32.728	0.0429276	0.274375	4.2791	17.2544	0.0769231	0.318308
5.199	36.0133	0.0472301	0.606636	7.265	30.492	0.0441929	0.25563	4.405	17.0252	0.0791863	0.31408
5.348	35.4027	0.0485837	0.59635	7.472	24.461	0.0454521	0.205069	4.5308	18.3453	0.0814478	0.338433
5.496	36.7991	0.0499282	0.619872	7.68	26.911	0.0467173	0.225608	4.6567	17.0694	0.083711	0.314895
5.645	32.8422	0.0512818	0.553219	7.888	27.652	0.0479826	0.23182	4.7825	15.3832	0.0859724	0.283788
5.794	29.3158	0.0526354	0.493818	8.095	30.477	0.0492418	0.255504	4.9084	18.0588	0.0882357	0.333148
5.942	31.6072	0.0539799	0.532416	8.303	23.317	0.050507	0.195478	5.0342	16.5069	0.0904971	0.304518
6.091	31.0408	0.0553335	0.522875	8.51	29.866	0.0517662	0.250381	5.1601	20.0138	0.0927603	0.369213
6.239	34.9841	0.056678	0.589299	8.718	41.078	0.0530315	0.344377	5.2859	22.4188	0.0950218	0.413581
6.388	33.6311	0.0580316	0.566508	8.925	40.352	0.0542906	0.338291	5.4118	18.5336	0.097285	0.341907
6.536	42.6663	0.0593761	0.718704	9.133	39.856	0.0555559	0.334133	5.5377	23.8938	0.0995483	0.440791
6.685	35.5282	0.0607297	0.598464	9.34	36.274	0.0568151	0.304103	5.6635	21.1103	0.10181	0.389442
6.833	38.9844	0.0620742	0.656683	9.548	40.748	0.0580803	0.341611	5.7894	19.4369	0.104073	0.358571
6.982	31.9088	0.0634278	0.537496	9.756	35.952	0.0593456	0.301403	5.9152	15.3962	0.106334	0.284028
7.131	33.0729	0.0647813	0.557105	9.963	38.186	0.0606048	0.320132	6.0411	15.8207	0.108598	0.291859
7.279	35.8019	0.0661258	0.603075	10.171	37.362	0.06187	0.313224	6.1669	17.7429	0.110859	0.32732
7.428	33.2351	0.0674794	0.559838	10.378	35.243	0.0631292	0.295459	6.2928	20.9095	0.113122	0.385737
7.576	29.7468	0.0688239	0.501078	10.586	30	0.0643945	0.251505	6.4186	17.1302	0.115384	0.316017
7.725	27.2105	0.0701775	0.458355	10.793	33.318	0.0656536	0.279321	6.5445	16.4118	0.117647	0.302764
7.873	24.4516	0.071522	0.411882	11.001	34.069	0.0669189	0.285617	6.6704	20.3525	0.11991	0.375462
8.022	27.5266	0.0728756	0.463679	11.209	31.657	0.0681842	0.265396	6.7962	20.4721	0.122172	0.377668
8.17	29.9502	0.0742201	0.504504	11.416	27.006	0.0694433	0.226405	6.9221	18.7583	0.124435	0.346052
8.319	32.4779	0.0755737	0.547083	11.624	27.131	0.0707086	0.227453	7.0479	19.6657	0.126696	0.362792
8.468	33.6035	0.0769273	0.566043	11.831	27.599	0.0719678	0.231376	7.1738	22.0422	0.12896	0.406633
8.616	30.8354	0.0782718	0.519415	12.039	31.412	0.073233	0.263342	7.2996	19.7158	0.131221	0.363716
8.765	30.0415	0.0796254	0.506042	12.246	42.768	0.0744922	0.358545	7.4255	22.2773	0.133484	0.41097
8.913	28.2062	0.0809699	0.475127	12.454	34.563	0.0757575	0.289759	7.5513	17.4383	0.135746	0.321701
9.062	26.1266	0.0823234	0.440097	12.662	33.358	0.0770227	0.279657	7.6772	24.0991	0.138009	0.444579
9.21	28.2265	0.0836679	0.475469	12.869	31.424	0.0782819	0.263443	7.8031	21.5637	0.140272	0.397806
9.359	32.5475	0.0850215	0.548255	13.077	26.519	0.0795472	0.222322	7.9289	25.8276	0.142534	0.476466
9.507	34.3482	0.086366	0.578588	13.284	32.182	0.0808064	0.269798	8.0548	24.7992	0.144797	0.457494
9.656	31.2105	0.0877196	0.525734	13.492	31.527	0.0820716	0.264306	8.1806	25.7543	0.147058	0.475114
9.805	28.313	0.0890732	0.476926	13.699	40.43	0.0833308	0.338945	8.3065	27.7558	0.149321	0.512037
9.953	25.04	0.0904177	0.421793	13.907	46.5	0.0845961	0.389832	8.4323	25.0344	0.151583	0.461833
10.102	25.7328	0.0917713	0.433463	14.115	38.404	0.0858613	0.32196	8.5582	24.7633	0.153846	0.456832
10.25	24.7297	0.0931158	0.416566	14.322	34.095	0.0871205	0.285835	8.6841	23.5592	0.156109	0.434619
10.399	26.3213	0.0944694	0.443376	14.53	39.662	0.0883858	0.332506	8.8099	29.2887	0.158371	0.540316
10.547	32.8411	0.0958139	0.553201	14.737	33.535	0.0896449	0.28114	8.9358	22.6357	0.160634	0.417582
10.696	27.6742	0.0971675	0.466166	14.945	45.855	0.0909102	0.384425	9.0616	21.5013	0.162896	0.396655
10.844	26.2261	0.098512	0.441773	15.152	43.58	0.0921694	0.365353	9.1875	26.4278	0.165159	0.487538
10.993	23.0495	0.0998655	0.388264	15.36	44.84	0.0934346	0.375916	9.3133	23.6175	0.16742	0.435694
11.141	31.7337	0.10121	0.534547	15.567	56.353	0.0946938	0.472435	9.4392	25.9686	0.169683	0.479067
11.29	27.284	0.102564	0.459593	15.775	44.635	0.0959591	0.374197	9.565	30.4747	0.171945	0.562195
11.439	22.3644	0.103917	0.376723	15.983	48.757	0.0972243	0.408754	9.6909	28.5208	0.174208	0.52615
11.587	26.4211	0.105262	0.445057	16.19	41.374	0.0984835	0.346859	9.8168	30.7993	0.176471	0.568184
11.736	30.4777	0.106615	0.51339	16.398	45.403	0.0997488	0.380636	9.9426	21.1675	0.178733	0.390497
11.884	32.1626	0.10796	0.541772	16.605	36.971	0.101008	0.309946	10.0685	28.7735	0.180996	0.530812
12.033	28.6839	0.109313	0.483174	16.813	28.529	0.102273	0.239173	10.1943	29.0163	0.183257	0.535291
12.181	27.1445	0.110658	0.457243	17.02	29.49	0.103532	0.247229	10.3202	25.9698	0.185521	0.479089
12.33	29.3789	0.112011	0.494881	17.228	29.687	0.104798	0.248881	10.446	30.84	0.187782	0.568934
12.478	27.1878	0.113356	0.457972	17.436	34.461	0.106063	0.288904	10.5719	27.8263	0.190045	0.513338
12.627	25.4355	0.11471	0.428455	17.643	32.799	0.107322	0.27497	10.6977	29.1893	0.192307	0.538482
12.776	25.9002	0.116063	0.436283	17.851	34.3	0.108587	0.287554	10.8236	31.7677	0.19457	0.586049
12.924	25.1271	0.117408	0.42326	18.058	35.15	0.109847	0.29468	10.9495	30.2144	0.196833	0.557393
13.073	25.7075	0.118761	0.433037	18.266	40.637	0.111112	0.34068	11.0753	29.0087	0.199095	0.535151
13.221	26.9235	0.120106	0.45352	18.473	50.212	0.112371	0.420952	11.2012	33.4121	0.201358	0.616384
13.37	26.0299	0.121459	0.438468	18.681	47.121	0.113636	0.395039	11.327	32.2404	0.203619	0.594769
13.518	26.7719	0.122804	0.450967	18.889	44.999	0.114901	0.377249	11.4529	33.3426	0.205883	0.615102
13.667	26.6766	0.124157	0.449361	19.096	37.862	0.116161	0.317416	11.5787	30.4899	0.208144	0.562476
13.815	27.943	0.125502	0.470693	19.304	40.728	0.117426	0.341443	11.7046	28.103	0.210407	0.518442
13.964	24.8176	0.126856	0.418047	19.511	33.571	0.118685	0.281442	11.8304	27.8824	0.212669	0.514373
14.113	25.4714	0.128209	0.42906	19.719	43.815	0.11995	0.367323	11.9563	30.0582	0.214932	0.554512
14.261	25.4008	0.129554	0.427871	19.926	46.208	0.12121	0.387385	12.0822	27.6401	0.217195	0.509903
14.41	22.5064	0.130907	0.379115	20.134	42.273	0.122475	0.354395	12.208	30.0221	0.219457	0.553846
14.558	21.4306	0.132252	0.360994	20.342	39.145	0.12374	0.328172	12.3339	33.1571	0.22172	0.61168
14.707	23.5606	0.133605	0.396873	20.549	37.596	0.124999	0.315186	12.4597	27.4615	0.223981	0.506608
14.855	26.8262	0.13495	0.451881	20.757	40.743	0.126265	0.341569	12.5856	29.8896	0.226245	0.551401
15.004	26.6163	0.136303	0.448346	20.964	40.965	0.127524	0.34343	12.7114	27.2827	0.228506	0.50331
15.152	25.0791	0.137648	0.422452	21.172	53.975	0.128789	0.452499	12.8373	29.0118	0.230769	0.535208
15.301	25.7966	0.139001	0.434538	21.379	48.156	0.130048	0.403716	12.9631	27.4157	0.233031	0.505763
15.45	24.1754	0.140355	0.407229	21.587	38.644	0.131313	0.323972	13.089	27.2976	0.235294	0.503584
15.598	23.1193	0.1417	0.389439	21.794	37.823	0.132573	0.317089	13.2149	26.9453	0.237557	0.497085
15.747	19.9076	0.143053	0.335339	22.002	44.329	0.133838	0.371632	13.3407	27.0338	0.239819	0.498718
15.895	20.0841	0.144398	0.338312	22.21	48.971	0.135103	0.410548	13.4666	25.6875	0.242082	0.473881
16.044	20.0881	0.145751	0.338379	22.417	45.778	0.136362	0.38378	13.5924	28.3389	0.244343	0.522794
16.192	19.845	0.147096	0.334285	22.625	43.497	0.137628	0.364657	13.7183	34.1244	0.246606	0.629525
16.341	21.5959	0.148449	0.363778	22.832	43.728	0.138887	0.366593	13.8441	31.22	0.248868	0.575945
16.489	19.5889	0.149794	0.329971	23.04	41.958	0.140152	0.351755	13.97	33.6616	0.251131	0.620987
16.638	19.7646	0.151147	0.33293	23.247	39.416	0.141411	0.330444	14.0959	29.3529	0.253394	0.5415
16.787	23.6923	0.152501	0.399091	23.455	41.695	0.142676	0.34955	14.2217	30.3533	0.255656	0.559956
16.935	21.1953	0.153845	0.35703	23.663	44.256	0.143942	0.37102	14.3476	34.3693	0.257919	0.634043
17.084	23.6973	0.155199	0.399176	23.87	42.629	0.145201	0.35738	14.4734	28.5499	0.260181	0.526687
17.232	21.9514	0.156544	0.369766	24.078	44.006	0.146466	0.368924	14.5993	22.8186	0.262444	0.420956
17.381	25.1579	0.157897	0.423779	24.285	56.3	0.147725	0.471991	14.7251	22.654	0.264705	0.41792
17.529	23.5833	0.159242	0.397255	24.493	51.202	0.148991	0.429252	14.851	24.829	0.266968	0.458044
17.678	19.2543	0.160595	0.324334	24.7	52.868	0.15025	0.443219	14.9768	29.5917	0.26923	0.545906
17.826	25.9894	0.16194	0.437786	24.908	52.937	0.151515	0.443797	15.1027	28.1853	0.271493	0.519961
17.975	23.4707	0.163293	0.395359	25.116	48.604	0.15278	0.407471	15.2286	27.096	0.273756	0.499865
18.123	20.1961	0.164638	0.340199	25.323	44.365	0.154039	0.371934	15.3544	34.6736	0.276018	0.639656
18.272	27.6823	0.165991	0.466302	25.531	46.951	0.155305	0.393613	15.4803	25.7495	0.278281	0.475025
18.421	20.2294	0.167345	0.34076	25.738	58.599	0.156564	0.491264	15.6061	25.7988	0.280542	0.475935
18.569	19.577	0.168689	0.32977	25.946	41.085	0.157829	0.344436	15.732	27.5683	0.282806	0.508578
18.718	22.123	0.170043	0.372657	26.153	41.366	0.159088	0.346792	15.8578	25.974	0.285067	0.479167
18.866	21.8783	0.171388	0.368535	26.361	48.922	0.160354	0.410137	15.9837	26.5058	0.28733	0.488977
19.015	20.1407	0.172741	0.339266	26.569	53.903	0.161619	0.451896	16.1095	21.9217	0.289592	0.40441
19.163	20.3382	0.174086	0.342592	26.776	47.64	0.162878	0.39939	16.2354	23.4938	0.291855	0.433412
19.312	19.8947	0.175439	0.335122	26.984	38.303	0.164143	0.321113	16.3613	29.0519	0.294118	0.535948
19.46	18.569	0.176784	0.312791	27.191	39.473	0.165402	0.330922	16.4871	27.9748	0.29638	0.516077
19.609	21.1096	0.178137	0.355586	27.399	37.618	0.166668	0.31537	16.613	30.1291	0.298643	0.55582
19.758	23.3629	0.179491	0.393543	27.606	37.142	0.167927	0.31138	16.7388	29.2214	0.300904	0.539075
19.906	22.9819	0.180835	0.387125	27.814	47.7	0.169192	0.399893	16.8647	28.5068	0.303168	0.525892
20.055	19.299	0.182189	0.325087	28.021	48.789	0.170451	0.409022	16.9905	28.1537	0.305429	0.519378
20.203	17.4829	0.183533	0.294495	28.229	55.356	0.171717	0.464077	17.1164	27.5621	0.307692	0.508464
20.352	21.176	0.184887	0.356705	28.437	59.171	0.172982	0.49606	17.2422	26.8199	0.309954	0.494772
20.5	23.0234	0.186232	0.387824	28.644	54.178	0.174241	0.454201	17.3681	25.9163	0.312217	0.478102
20.649	19.1585	0.187585	0.322721	28.852	56.292	0.175506	0.471924	17.494	28.2096	0.31448	0.520409
20.797	17.7708	0.18893	0.299345	29.059	60.128	0.176765	0.504083	17.6198	25.6244	0.316742	0.472717
20.946	16.4992	0.190283	0.277925	29.267	55.374	0.178031	0.464228	17.7457	24.05	0.319005	0.443673
21.095	18.3111	0.191637	0.308446	29.474	42.523	0.17929	0.356491	17.8715	26.5543	0.321266	0.489872
21.243	18.5789	0.192981	0.312957	29.682	59.246	0.180555	0.496689	17.9974	31.5329	0.32353	0.581717
21.392	17.6478	0.194335	0.297273	29.89	63.211	0.18182	0.529929	18.1232	32.1272	0.325791	0.592681
21.54	16.5704	0.195679	0.279125	30.097	56.346	0.18308	0.472376	18.2491	28.5082	0.328054	0.525918
21.689	14.1834	0.197033	0.238916	30.305	59.256	0.184345	0.496772	18.3749	32.2803	0.330316	0.595505
21.837	18.8072	0.198378	0.316803	30.512	57.465	0.185604	0.481758	18.5008	32.8572	0.332579	0.606148
21.986	19.7411	0.199731	0.332534	30.72	52.038	0.186869	0.43626	18.6267	31.6317	0.334842	0.58354
22.134	18.4132	0.201076	0.310166	30.927	34.247	0.188128	0.28711	18.7525	33.4631	0.337104	0.617325
22.283	21.5086	0.202429	0.362307	31.135	44.581	0.189394	0.373745	18.8784	27.2596	0.339367	0.502883
22.432	17.527	0.203783	0.295238	31.343	46.855	0.190659	0.392809	19.0042	27.6925	0.341628	0.51087
22.58	11.8974	0.205127	0.200409	31.55	49.53	0.191918	0.415234	19.1301	24.605	0.343892	0.453912
22.729	16.858	0.206481	0.283969	31.758	55.947	0.193183	0.469031	19.2559	26.2012	0.346153	0.483358
22.877	15.0056	0.207825	0.252766	31.965	50.575	0.194443	0.423995	19.3818	30.6978	0.348416	0.566311
23.026	17.3965	0.209179	0.29304	32.173	40.565	0.195708	0.340076	19.5077	30.2896	0.350679	0.558781
23.174	16	0.210523	0.269516	32.38	45.954	0.196967	0.385255	19.6335	30.3841	0.352941	0.560524
23.323	16.5325	0.211877	0.278486	32.588	36.206	0.198232	0.303533	19.7594	32.1432	0.355204	0.592976
23.471	16.4286	0.213222	0.276736	32.795	46.145	0.199491	0.386856	19.8852	33.416	0.357466	0.616456
23.62	18.5472	0.214575	0.312423	33.003	39.025	0.200757	0.327166	20.0111	28.2048	0.359729	0.52032
23.769	12.5485	0.215929	0.211377	33.211	51.309	0.202022	0.430149	20.1369	28.4312	0.36199	0.524497
23.917	8.9505	0.217273	0.150769	33.418	55.359	0.203281	0.464102	20.2628	36.3622	0.364253	0.670808
24.066	9.0302	0.218627	0.152112	33.626	57.64	0.204546	0.483225	20.3886	32.1262	0.366515	0.592662
24.214	9.673	0.219971	0.162939	33.833	53.659	0.205806	0.44985	20.5145	36.4586	0.368778	0.672586
24.363	7.3585	0.221325	0.123952	34.041	44.038	0.207071	0.369192	20.6404	36.5656	0.371041	0.67456
24.511	7.3946	0.222669	0.12456	34.248	45.513	0.20833	0.381558	20.7662	33.2262	0.373303	0.612955
24.66	6.6519	0.224023	0.11205	34.456	42.998	0.209595	0.360473	20.8921	32.3954	0.375566	0.597628
24.808	7.3371	0.225367	0.123592	34.664	40.179	0.210861	0.33684	21.0179	33.9891	0.377827	0.627029
24.957	7.3694	0.226721	0.124136	34.871	47.47	0.21212	0.397964	21.1438	30.8103	0.380091	0.568387
25.105	5.7719	0.228066	0.0972263	35.079	53.761	0.213385	0.450705	21.2696	28.3253	0.382352	0.522543
25.254	7.1411	0.229419	0.12029	35.286	56.071	0.214644	0.470071	21.3955	32.1716	0.384615	0.5935
25.403	7.8343	0.230773	0.131967	35.494	44.661	0.215909	0.374415	21.5213	31.6	0.386877	0.582955
25.551	5.5997	0.232117	0.0943257	35.701	42.197	0.217169	0.353758	21.6472	34.9425	0.38914	0.644617
25.7	6.8621	0.233471	0.115591	35.909	49.345	0.218434	0.413684	21.7731	30.9721	0.391403	0.571371
25.848	8.3706	0.234815	0.141001	36.117	45.216	0.219699	0.379068	21.8989	34.631	0.393665	0.638871
25.997	9.521	0.236169	0.160379	36.324	50.392	0.220958	0.422461	22.0248	34.081	0.395928	0.628724
26.145	8.2918	0.237513	0.139673	36.532	51.597	0.222224	0.432563	22.1506	36.0501	0.398189	0.66505
26.294	9.2809	0.238867	0.156335	36.739	46.579	0.223483	0.390495	22.2765	39.4638	0.400453	0.728026
26.442	8.8525	0.240211	0.149118	36.947	45.747	0.224748	0.38352	22.4023	35.0868	0.402714	0.647279
26.591	7.7822	0.241565	0.131089	37.154	55.812	0.226007	0.4679	22.5282	32.9618	0.404977	0.608077
26.74	9.3915	0.242919	0.158198	37.362	65.838	0.227272	0.551953	22.654	34.2089	0.407239	0.631084
26.888	10.2416	0.244263	0.172517	37.57	66.832	0.228538	0.560286	22.7799	31.276	0.409502	0.576978
27.037	7.0877	0.245617	0.119391	37.777	64.344	0.229797	0.539428	22.9058	34.7439	0.411765	0.640953
27.185	7.9165	0.246961	0.133352	37.985	53.434	0.231062	0.447964	23.0316	35.0784	0.414027	0.647124
27.334	8.7499	0.248315	0.14739	38.192	45.481	0.232321	0.38129	23.1575	32.9656	0.41629	0.608147
27.482	6.7209	0.249659	0.113212	38.4	43.317	0.233587	0.363148	23.2833	32.9602	0.418551	0.608048
27.631	4.3071	0.251013	0.0725521	38.607	55.46	0.234846	0.464949	23.4092	33.9406	0.420815	0.626134
27.779	5.0692	0.252357	0.0853895	38.815	54.984	0.236111	0.460958	23.535	36.1479	0.423076	0.666854
27.928	3.6504	0.253711	0.0614902	39.022	50.975	0.23737	0.427349	23.6609	38.8059	0.425339	0.715889
28.077	6.6503	0.255065	0.112023	39.23	53.63	0.238635	0.449607	23.7867	40.2175	0.427601	0.74193
28.225	5.4241	0.256409	0.0913677	39.438	51.347	0.239901	0.430467	23.9126	33.6063	0.429864	0.619967
28.374	3.6022	0.257763	0.0606782	39.645	41.026	0.24116	0.343941	24.0385	32.1146	0.432127	0.592448
28.522	7.1028	0.259107	0.119645	39.853	43.824	0.242425	0.367398	24.1643	35.1209	0.434389	0.647908
28.671	5.9343	0.260461	0.0999619	40.06	41.655	0.243684	0.349214	24.2902	32.4757	0.436652	0.59911
28.819	4.9649	0.261805	0.0836326	40.268	36.299	0.24495	0.304312	24.416	29.6332	0.438913	0.546671
28.968	3.2105	0.263159	0.0540801	40.475	44.752	0.246209	0.375178	24.5419	31.2561	0.441177	0.576611
29.116	2.8889	0.264503	0.0486629	40.683	54.288	0.247474	0.455123	24.6677	31.3353	0.443438	0.578072
29.265	2.0758	0.265857	0.0349664	40.891	49.16	0.248739	0.412133	24.7936	31.4796	0.445701	0.580734
29.414	3.7945	0.267211	0.0639175	41.098	50.894	0.249998	0.42667	24.9195	31.8864	0.447964	0.588238
29.562	4.78	0.268555	0.080518	41.306	50.567	0.251264	0.423928	25.0453	31.2754	0.450226	0.576967
29.711	3.8123	0.269909	0.0642173	41.513	45.349	0.252523	0.380183	25.1712	32.6923	0.452489	0.603106
29.859	4.6247	0.271253	0.077902	41.721	54.489	0.253788	0.456808	25.297	34.9157	0.454751	0.644123
30.008	3.2634	0.272607	0.0549712	41.928	51.82	0.255047	0.434433	25.4229	27.5638	0.457014	0.508495
30.156	3.7612	0.273951	0.0633566	42.136	53.656	0.256313	0.449825	25.5487	34.2649	0.459275	0.632117
30.305	3.6942	0.275305	0.062228	42.344	54.316	0.257578	0.455358	25.6746	36.6627	0.461538	0.676351
30.453	4.1442	0.276649	0.0698081	42.551	52.168	0.258837	0.43735	25.8004	35.9305	0.4638	0.662844
30.602	3.5911	0.278003	0.0604913	42.759	47.264	0.260102	0.396237	25.9263	32.5869	0.466063	0.601161
30.751	3.0424	0.279356	0.0512485	42.966	49.398	0.261361	0.414128	26.0522	30.5496	0.468326	0.563577
30.899	3.5614	0.280701	0.059991	43.174	61.62	0.262627	0.516591	26.178	36.0727	0.470588	0.665467
31.048	2.9349	0.282055	0.0494377	43.381	59.55	0.263886	0.499237	26.3039	35.7311	0.472851	0.659165
31.196	3.1878	0.283399	0.0536978	43.589	45.716	0.265151	0.38326	26.4297	32.3843	0.475112	0.597424
31.345	4.766	0.284753	0.0802822	43.797	48.515	0.266416	0.406725	26.5556	31.3351	0.477376	0.578068
31.493	5.7954	0.286097	0.0976222	44.004	49.093	0.267676	0.411571	26.6814	26.7014	0.479637	0.492586
31.642	3.6761	0.287451	0.0619231	44.212	51.31	0.268941	0.430157	26.8073	28.1452	0.4819	0.519221
31.79	2.5182	0.288795	0.0424185	44.419	49.982	0.2702	0.419024	26.9331	26.4821	0.484162	0.48854
31.939	3.595	0.290149	0.060557	44.627	49.326	0.271465	0.413524	27.059	31.442	0.486425	0.58004
32.087	4.4949	0.291493	0.0757156	44.834	48.539	0.272725	0.406926	27.1849	27.793	0.488688	0.512724
32.236	4.4105	0.292847	0.0742939	45.042	46.334	0.27399	0.388441	27.3107	26.0955	0.49095	0.481408
32.385	4.779	0.2942	0.0805012	45.249	45.884	0.275249	0.384668	27.4366	27.5752	0.493213	0.508706
32.533	4.6883	0.295545	0.0789733	45.457	55.816	0.276514	0.467933	27.5624	27.7507	0.495474	0.511943
32.682	6.1931	0.296899	0.104321	45.665	57.825	0.277779	0.484776	27.6883	28.7476	0.497738	0.530334
32.83	6	0.298243	0.101069	45.872	55.888	0.279039	0.468537	27.8141	33	0.499999	0.608782
32.979	5.9514	0.299597	0.10025	46.08	46.571	0.280304	0.390428	27.94	33.4212	0.502262	0.616552
33.127	7.5712	0.300941	0.127535	46.287	45.412	0.281563	0.380711	28.0658	35.4364	0.504524	0.653729
33.276	8.3686	0.302295	0.140967	46.495	47.896	0.282828	0.401536	28.1917	33.385	0.506787	0.615884
33.424	7.5254	0.303639	0.126764	46.702	53.718	0.284088	0.450345	28.3176	26.3387	0.50905	0.485895
33.573	7.5125	0.304993	0.126546	46.91	48.902	0.285353	0.40997	28.4434	26.8483	0.511312	0.495296
33.722	10.9606	0.306346	0.184629	47.118	49.755	0.286618	0.417121	28.5693	31.8618	0.513575	0.587785
33.87	10.2308	0.307691	0.172335	47.325	50.994	0.287877	0.427508	28.6951	37.9981	0.515836	0.700987
34.019	7.5656	0.309044	0.127441	47.533	47.399	0.289142	0.397369	28.821	29.4624	0.5181	0.543521
34.167	5.7117	0.310389	0.0962123	47.74	56.938	0.290402	0.477339	28.9468	31.6354	0.520361	0.583608
34.316	5.142	0.311743	0.0866158	47.948	64.342	0.291667	0.539411	29.0727	35.9552	0.522624	0.663299
34.464	7.6785	0.313087	0.129343	48.155	58.915	0.292926	0.493914	29.1985	30.5742	0.524886	0.564031
34.613	5.2164	0.314441	0.0878691	48.363	69.901	0.294191	0.586015	29.3244	25.9877	0.527149	0.479419
34.761	7.3158	0.315785	0.123233	48.571	54.996	0.295457	0.461059	29.4503	25.9827	0.529412	0.479327
34.91	6.3408	0.317139	0.106809	48.778	63.538	0.296716	0.53267	29.5761	25.5739	0.531674	0.471786
35.059	7.9349	0.318492	0.133662	48.986	58.126	0.297981	0.487299	29.702	26.5154	0.533937	0.489154
35.207	6.2532	0.319837	0.105334	49.193	64.631	0.29924	0.541834	29.8278	29.2063	0.536198	0.538796
35.356	7.6726	0.32119	0.129243	49.401	55.786	0.300505	0.467682	29.9537	29.716	0.538462	0.548199
35.504	6.2325	0.322535	0.104985	49.608	53.81	0.301765	0.451116	30.0795	26.4316	0.540723	0.487609
35.653	7.3977	0.323889	0.124613	49.816	57.289	0.30303	0.480282	30.2054	30.6949	0.542986	0.566258
35.801	5.7052	0.325233	0.0961028	50.024	71.286	0.304295	0.597626	30.3313	24.6725	0.545249	0.455157
35.95	7.1555	0.326587	0.120533	50.231	56.709	0.305554	0.47542	30.4571	23.6697	0.547511	0.436657
36.098	5.7281	0.327931	0.0964885	50.439	50.106	0.30682	0.420063	30.583	31.6216	0.549774	0.583353
36.247	7.8622	0.329285	0.132437	50.646	50.327	0.308079	0.421916	30.7088	27.9933	0.552036	0.516419
36.396	10.4913	0.330638	0.176724	50.854	49.717	0.309344	0.416802	30.8347	22.7271	0.554299	0.419268
36.544	11.3423	0.331983	0.191058	51.061	52.817	0.310603	0.442791	30.9605	23.7889	0.55656	0.438856
36.693	8.6667	0.333336	0.145989	51.269	62.717	0.311869	0.525788	31.0864	23.4014	0.558823	0.431708
36.841	9.5044	0.334681	0.160099	51.476	51.285	0.313128	0.429948	31.2122	26.194	0.561085	0.483225
36.99	8.9088	0.336034	0.150067	51.684	53.464	0.314393	0.448215	31.3381	34.0042	0.563348	0.627307
37.138	9.8486	0.337379	0.165897	51.892	49.057	0.315658	0.411269	31.464	31.1065	0.565611	0.573851
37.287	14.517	0.338733	0.244536	52.099	55.238	0.316917	0.463087	31.5898	32.9491	0.567873	0.607843
37.435	15.1841	0.340077	0.255773	52.307	55.562	0.318183	0.465804	31.7157	32.7518	0.570136	0.604203
37.584	12.4636	0.341431	0.209947	52.514	54.276	0.319442	0.455023	31.8415	31.9617	0.572398	0.589627
37.733	10.0767	0.342784	0.16974	52.722	57.547	0.320707	0.482445	31.9674	27.0011	0.574661	0.498115
37.881	6.3497	0.344129	0.106959	52.929	60.289	0.321966	0.505433	32.0932	27.5089	0.576922	0.507482
38.03	6.877	0.345482	0.115841	53.137	52.902	0.323232	0.443504	32.2191	29.6051	0.579185	0.546153
38.178	9.5648	0.346827	0.161117	53.345	53.59	0.324497	0.449271	32.3449	28.3532	0.581447	0.523058
38.327	10.3597	0.34818	0.174507	53.552	49.312	0.325756	0.413407	32.4708	26.7089	0.58371	0.492724
38.475	8.2794	0.349525	0.139465	53.76	43.388	0.327021	0.363743	32.5967	25.7123	0.585973	0.474339
38.624	9.5789	0.350878	0.161354	53.967	47.434	0.32828	0.397663	32.7225	27.9619	0.588235	0.515839
38.772	12.1691	0.352223	0.204986	54.175	46.372	0.329546	0.388759	32.8484	29.2264	0.590498	0.539167
38.921	10.2097	0.353577	0.17198	54.382	47.981	0.330805	0.402248	32.9742	30.3744	0.592759	0.560345
39.069	6.7148	0.354921	0.113109	54.59	45.431	0.33207	0.380871	33.1001	32.7306	0.595023	0.603812
39.218	7.6428	0.356275	0.128741	54.798	50.092	0.333335	0.419946	33.2259	35.1584	0.597284	0.6486
39.367	10.2414	0.357628	0.172514	55.005	40.368	0.334595	0.338425	33.3518	30.7126	0.599547	0.566584
39.515	8.6469	0.358973	0.145655	55.213	52.354	0.33586	0.438909	33.4776	26.3623	0.601809	0.48633
39.664	7.3105	0.360326	0.123144	55.42	52.367	0.337119	0.439018	33.6035	24.4446	0.604072	0.450952
39.812	8.686	0.361671	0.146314	55.628	53.028	0.338384	0.44456	33.7294	25.8064	0.606335	0.476075
39.961	7.8229	0.363024	0.131775	55.835	58.594	0.339643	0.491222	33.8552	25.5235	0.608597	0.470856
40.109	6.374	0.364369	0.107369	56.043	55.439	0.340909	0.464773	33.9811	27.9872	0.61086	0.516306
40.258	9.6326	0.365722	0.162259	56.251	66.725	0.342174	0.559389	34.1069	32.8516	0.613121	0.606044
40.406	8.0946	0.367067	0.136352	56.458	58.853	0.343433	0.493394	34.2328	27.071	0.615385	0.499404
40.555	11.3158	0.368421	0.190612	56.666	54.175	0.344698	0.454176	34.3586	26.308	0.617646	0.485328
40.704	8.7118	0.369774	0.146748	56.873	54.251	0.345958	0.454813	34.4845	26.0398	0.619909	0.480381
40.852	13.6055	0.371119	0.229182	57.081	51.756	0.347223	0.433896	34.6103	22.8842	0.622171	0.422166
41.001	9.9421	0.372472	0.167472	57.288	54.606	0.348482	0.457789	34.7362	23.5021	0.624434	0.433565
41.149	5.7324	0.373817	0.096561	57.496	58.85	0.349747	0.493369	34.8621	21.6561	0.626697	0.39951
41.298	7.5202	0.37517	0.126676	57.703	67.917	0.351006	0.569382	34.9879	23.7901	0.628959	0.438878
41.446	4.4584	0.376515	0.0751007	57.911	64.173	0.352272	0.537994	35.1138	24.0395	0.631222	0.443479
41.595	4.8504	0.377868	0.0817039	58.119	64.732	0.353537	0.54268	35.2396	23.008	0.633483	0.42445
41.743	5.6096	0.379213	0.0944924	58.326	57.837	0.354796	0.484876	35.3655	33.0846	0.635747	0.610343
41.892	5.2442	0.380567	0.0883374	58.534	52.135	0.356061	0.437073	35.4913	27.102	0.638008	0.499976
42.041	3.5502	0.38192	0.0598023	58.741	53.038	0.357321	0.444644	35.6172	26.3005	0.640271	0.48519
42.189	9.6119	0.383265	0.16191	58.949	50.828	0.358586	0.426116	35.7431	21.1269	0.642534	0.389748
42.338	7.2485	0.384618	0.122099	59.156	49.411	0.359845	0.414237	35.8689	21.4131	0.644796	0.395028
42.486	5.0351	0.385963	0.0848151	59.364	55.446	0.36111	0.464831	35.9948	24.2664	0.647059	0.447665
42.635	3.2654	0.387316	0.0550049	59.572	52.599	0.362376	0.440963	36.1206	22.8948	0.649321	0.422362
42.783	3.8655	0.388661	0.0651135	59.779	42.098	0.363635	0.352928	36.2465	21.4463	0.651584	0.39564
42.932	3.5308	0.390014	0.0594755	59.987	49.995	0.3649	0.419133	36.3723	22.2544	0.653845	0.410548
43.08	2.1094	0.391359	0.0355324	60.194	47.854	0.366159	0.401184	36.4982	26.5201	0.656108	0.489241
43.229	3.5761	0.392712	0.0602386	60.402	49.576	0.367424	0.41562	36.624	22.3181	0.65837	0.411723
43.378	3.3681	0.394066	0.0567349	60.609	51.35	0.368684	0.430492	36.7499	24.4084	0.660633	0.450285
43.526	2.2201	0.395411	0.0373971	60.817	55.213	0.369949	0.462878	36.8758	23.1744	0.662896	0.42752
43.675	2	0.396764	0.0336895	61.025	57.77	0.371214	0.484314	37.0016	24.3254	0.665158	0.448753
43.823	2	0.398109	0.0336895	61.232	63.693	0.372473	0.53397	37.1275	23.7791	0.667421	0.438675
43.972	2.8401	0.399462	0.0478408	61.44	56.831	0.373739	0.476442	37.2533	22.3518	0.669683	0.412345
44.12	2.7686	0.400807	0.0466364	61.647	49.576	0.374998	0.41562	37.3792	23.1123	0.671946	0.426374
44.269	1.9217	0.40216	0.0323706	61.855	57.609	0.376263	0.482965	37.505	21.9611	0.674207	0.405137
44.417	2.5263	0.403505	0.0425549	62.062	54.358	0.377522	0.45571	37.6309	20.8131	0.67647	0.383959
44.566	2.3239	0.404858	0.0391456	62.27	52.033	0.378787	0.436218	37.7567	24.4593	0.678732	0.451224
44.715	3.1744	0.406212	0.053472	62.478	51.57	0.380053	0.432337	37.8826	19.1538	0.680995	0.353348
44.863	3.3768	0.407556	0.0568814	62.685	47.518	0.381312	0.398367	38.0085	23.0706	0.683258	0.425605
45.012	4.5151	0.40891	0.0760558	62.893	55.252	0.382577	0.463205	38.1343	23.7209	0.68552	0.437602
45.16	3.1834	0.410255	0.0536236	63.1	61.819	0.383836	0.518259	38.2602	26.1611	0.687783	0.482618
45.309	3.0653	0.411608	0.0516343	63.308	53.724	0.385102	0.450395	38.386	23.8112	0.690044	0.439268
45.457	5.0763	0.412953	0.0855091	63.515	53.615	0.386361	0.449481	38.5119	24.1953	0.692308	0.446353
45.606	2.5902	0.414306	0.0436313	63.723	68.888	0.387626	0.577522	38.6377	23.6368	0.694569	0.43605
45.754	6.4197	0.415651	0.108138	63.93	66.129	0.388885	0.554392	38.7636	23.7293	0.696832	0.437757
45.903	2.9231	0.417004	0.049239	64.138	56.467	0.39015	0.473391	38.8894	26.8372	0.699094	0.495091
46.051	1.9487	0.418349	0.0328254	64.346	60.76	0.391416	0.509381	39.0153	25.4389	0.701357	0.469295
46.2	1.0387	0.419702	0.0174967	64.553	68.479	0.392675	0.574093	39.1412	27.099	0.70362	0.499921
46.349	2.7368	0.421056	0.0461008	64.761	67.961	0.39394	0.569751	39.267	26.8339	0.705882	0.49503
46.497	2.9636	0.4224	0.0499212	64.968	54.092	0.395199	0.45348	39.3929	24.9674	0.708145	0.460597
46.646	1.083	0.423754	0.0182429	65.176	47.298	0.396465	0.396523	39.5187	26.1053	0.710406	0.481589
46.794	3.3843	0.425099	0.0570078	65.383	50.386	0.397724	0.422411	39.6446	25.8438	0.71267	0.476765
46.943	2.1391	0.426452	0.0360327	65.591	45.688	0.398989	0.383025	39.7704	27.8919	0.714931	0.514548
47.091	3.5177	0.427797	0.0592549	65.799	53.767	0.400254	0.450755	39.8963	26.1726	0.717194	0.482831
47.24	2.2255	0.42915	0.037488	66.006	53.09	0.401513	0.44508	40.0221	23.0586	0.719456	0.425384
47.388	3.6061	0.430495	0.0607439	66.214	58.118	0.402779	0.487232	40.148	26.9676	0.721719	0.497497
47.537	2.6338	0.431848	0.0443658	66.421	55.828	0.404038	0.468034	40.2739	22.7459	0.723982	0.419615
47.686	2.0514	0.433202	0.0345554	66.629	55.531	0.405303	0.465544	40.3997	26.3705	0.726244	0.486481
47.834	4.2187	0.434546	0.071063	66.836	58.53	0.406562	0.490686	40.5256	27.1576	0.728507	0.501002
47.983	2.5858	0.4359	0.0435572	67.044	60.577	0.407828	0.507847	40.6514	28.0296	0.730768	0.517088
48.131	2	0.437244	0.0336895	67.252	61.768	0.409093	0.517832	40.7773	24.9583	0.733032	0.460429
48.28	2.4561	0.438598	0.0413724	67.459	63.059	0.410352	0.528655	40.9031	23.6955	0.735293	0.437133
48.428	2.3841	0.439943	0.0401596	67.667	60.799	0.411617	0.509708	41.029	24.9593	0.737556	0.460448
48.577	1.554	0.441296	0.0261768	67.874	53.801	0.412876	0.45104	41.1549	24.6514	0.739819	0.454768
48.725	2.2636	0.442641	0.0381298	68.082	46.642	0.414142	0.391023	41.2807	24.8733	0.742081	0.458861
48.874	2.1782	0.443994	0.0366913	68.289	54.121	0.415401	0.453723	41.4066	27.3949	0.744344	0.505379
49.023	1.5596	0.445348	0.0262711	68.497	53.853	0.416666	0.451476	41.5324	24.8937	0.746606	0.459237
49.171	1.5802	0.446692	0.0266181	68.704	51.795	0.417925	0.434223	41.6583	24.0812	0.748869	0.444248
49.32	2.5425	0.448046	0.0428278	68.912	52.304	0.419191	0.43849	41.7841	21.9507	0.75113	0.404945
49.468	2.3046	0.44939	0.0388205	69.12	52.354	0.420456	0.438909	41.91	21.0701	0.753394	0.3887
49.617	1.8447	0.450744	0.0310736	69.327	55.951	0.421715	0.469065	42.0358	22.643	0.755655	0.417717
49.765	2.8006	0.452089	0.0471755	69.535	58.96	0.42298	0.494291	42.1617	22.6359	0.757918	0.417586
49.914	2.5858	0.453442	0.0435572	69.742	59.129	0.424239	0.495708	42.2876	22.1122	0.760181	0.407924
50.062	1.6185	0.454787	0.0272633	69.95	53.672	0.425505	0.449959	42.4134	26.0177	0.762443	0.479973
50.211	1.7895	0.45614	0.0301437	70.157	51.23	0.426764	0.429486	42.5393	24.8858	0.764706	0.459092
50.36	1.4058	0.457494	0.0236804	70.365	49.44	0.428029	0.41448	42.6651	23.7466	0.766968	0.438076
50.508	2.2071	0.458838	0.0371781	70.573	50.464	0.429294	0.423065	42.791	28.5562	0.769231	0.526803
50.657	2.4882	0.460192	0.0419132	70.78	58.231	0.430554	0.488179	42.9168	28.2536	0.771492	0.521221
50.805	2.7515	0.461536	0.0463484	70.988	57.37	0.431819	0.480961	43.0427	21.7049	0.773755	0.400411
50.954	1.6266	0.46289	0.0273997	71.195	58.352	0.433078	0.489194	43.1685	23.5817	0.776017	0.435034
51.102	1.8286	0.464234	0.0308024	71.403	53.192	0.434343	0.445935	43.2944	22.8038	0.77828	0.420683
51.251	1.3388	0.465588	0.0225518	71.61	62.521	0.435602	0.524144	43.4203	24.9807	0.780543	0.460842
51.399	2	0.466933	0.0336895	71.818	55.517	0.436868	0.465426	43.5461	25.6461	0.782805	0.473118
51.548	2	0.468286	0.0336895	72.026	45.432	0.438133	0.380879	43.672	26.1391	0.785068	0.482212
51.697	1.9309	0.46964	0.0325256	72.233	49.868	0.439392	0.418068	43.7978	20.2143	0.787329	0.372912
51.845	1.2216	0.470984	0.0205776	72.441	53.212	0.440657	0.446103	43.9237	20.122	0.789593	0.371209
51.994	2.9653	0.472338	0.0499498	72.648	53.345	0.441917	0.447218	44.0495	20.1279	0.791854	0.371318
52.142	1.4211	0.473682	0.0239381	72.856	44.517	0.443182	0.373208	44.1754	20.9723	0.794117	0.386896
52.291	2.9537	0.475036	0.0497544	73.063	50.252	0.444441	0.421287	44.3012	20.1319	0.796379	0.371392
52.439	2.1094	0.47638	0.0355324	73.271	59.96	0.445706	0.502674	44.4271	20.2451	0.798642	0.37348
52.588	1.8007	0.477734	0.0303324	73.479	61.548	0.446972	0.515987	44.553	22.004	0.800905	0.405928
52.736	2.4116	0.479078	0.0406229	73.686	59.024	0.448231	0.494827	44.6788	21.6855	0.803167	0.400053
52.885	1.7863	0.480432	0.0300898	73.894	57.767	0.449496	0.484289	44.8047	21.1685	0.80543	0.390515
53.034	1.1445	0.481786	0.0192788	74.101	63.464	0.450755	0.53205	44.9305	19.0947	0.807691	0.352258
53.182	3.4147	0.48313	0.0575198	74.309	57.975	0.45202	0.486033	45.0564	20.6298	0.809955	0.380577
53.331	3.1246	0.484484	0.0526332	74.516	48.857	0.45328	0.409592	45.1822	20.4208	0.812216	0.376722
53.479	2.4145	0.485828	0.0406717	74.724	56.585	0.454545	0.47438	45.3081	24.8307	0.814479	0.458075
53.628	1.5483	0.487182	0.0260808	74.931	53.769	0.455804	0.450772	45.4339	22.3475	0.816741	0.412265
53.776	1.0729	0.488526	0.0180728	75.139	56.442	0.457069	0.473181	45.5598	22.2399	0.819004	0.41028
53.925	1.2996	0.48988	0.0218915	75.347	55.969	0.458335	0.469216	45.6857	21.776	0.821267	0.401722
54.073	2.1228	0.491224	0.0357581	75.554	51.924	0.459594	0.435305	45.8115	22.8547	0.823529	0.421622
54.222	1.7487	0.492578	0.0294565	75.762	54.05	0.460859	0.453128	45.9374	26.0767	0.825792	0.481061
54.37	2.5827	0.493922	0.043505	75.969	54.256	0.462118	0.454855	46.0632	21.0643	0.828053	0.388593
54.519	2.7935	0.495276	0.0470559	76.177	50.272	0.463383	0.421455	46.1891	18.5684	0.830317	0.342549
54.668	2.0027	0.49663	0.033735	76.384	58.448	0.464643	0.489998	46.3149	18.4278	0.832578	0.339955
54.816	1.157	0.497974	0.0194894	76.592	57.883	0.465908	0.485262	46.4408	18.215	0.834841	0.336029
54.965	0.6034	0.499328	0.0101641	76.8	57.532	0.467173	0.482319	46.5667	17.4354	0.837104	0.321647
55.113	1.0325	0.500672	0.0173922	77.007	52.888	0.468432	0.443386	46.6925	16.5797	0.839366	0.305861
55.262	1.5385	0.502026	0.0259157	77.215	55.156	0.469698	0.4624	46.8184	15.5011	0.841629	0.285963
55.41	1.4359	0.50337	0.0241874	77.422	50.079	0.470957	0.419837	46.9442	16.7175	0.843891	0.308403
55.559	1.5897	0.504724	0.0267781	77.63	46.491	0.472222	0.389757	47.0701	13.7574	0.846154	0.253796
55.707	1	0.506068	0.0168448	77.837	48.531	0.473481	0.406859	47.1959	12.8707	0.848415	0.237438
55.856	1.2703	0.507422	0.0213979	78.045	54.284	0.474746	0.45509	47.3218	14.5057	0.850679	0.2676
56.005	1.8596	0.508776	0.0313245	78.253	59.706	0.476012	0.500545	47.4476	19.6471	0.85294	0.362448
56.153	2.2074	0.51012	0.0371831	78.46	63.689	0.477271	0.533936	47.5735	20.6802	0.855203	0.381507
56.302	2.0206	0.511474	0.0340365	78.668	51.235	0.478536	0.429528	47.6994	16.43	0.857466	0.3031
56.45	1.8462	0.512818	0.0310988	78.875	51.006	0.479795	0.427609	47.8252	20.3389	0.859728	0.375211
56.599	1.9053	0.514172	0.0320943	79.083	47.037	0.481061	0.394334	47.9511	23.5708	0.861991	0.434833
56.747	2.3027	0.515516	0.0387885	79.29	45.502	0.48232	0.381466	48.0769	25.7354	0.864253	0.474765
56.896	2.5718	0.51687	0.0433214	79.498	49.526	0.483585	0.415201	48.2028	23.5631	0.866516	0.434691
57.044	3.5989	0.518214	0.0606227	79.706	47.906	0.48485	0.40162	48.3286	23.4833	0.868777	0.433218
57.193	2.4702	0.519568	0.04161	79.913	48.194	0.48611	0.404034	48.4545	26.5439	0.87104	0.48968
57.342	3.3862	0.520922	0.0570398	80.121	49.193	0.487375	0.412409	48.5803	24.9808	0.873302	0.460844
57.49	2.778	0.522266	0.0467948	80.328	61.798	0.488634	0.518083	48.7062	26.0534	0.875565	0.480632
57.639	3.9045	0.52362	0.0657704	80.536	60.826	0.489899	0.509934	48.8321	24.7379	0.877828	0.456363
57.787	3.7594	0.524964	0.0633262	80.743	51.095	0.491158	0.428355	48.9579	24.2612	0.88009	0.447569
57.936	2	0.526318	0.0336895	80.951	58.146	0.492424	0.487467	49.0838	26.391	0.882353	0.48686
58.084	3.6055	0.527662	0.0607338	81.158	56.691	0.493683	0.475269	49.2096	23.4379	0.884614	0.432381
58.233	3.0448	0.529016	0.051289	81.366	52.902	0.494948	0.443504	49.3355	27.8182	0.886878	0.513188
58.381	3.7284	0.53036	0.062804	81.574	47.214	0.496213	0.395818	49.4613	24.8891	0.889139	0.459153
58.53	2.4467	0.531714	0.0412141	81.781	47.738	0.497473	0.400211	49.5872	29.1569	0.891402	0.537885
58.679	2.4695	0.533067	0.0415982	81.989	53.523	0.498738	0.44871	49.713	29.4138	0.893664	0.542624
58.827	1.9352	0.534412	0.032598	82.196	51.701	0.499997	0.433435	49.8389	26.1822	0.895927	0.483008
58.976	1.9934	0.535766	0.0335784	82.404	56.73	0.501262	0.475596	49.9648	30.2091	0.89819	0.557296
59.124	2.5601	0.53711	0.0431243	82.611	48.255	0.502521	0.404546	50.0906	31.2964	0.900452	0.577354
59.273	2.1243	0.538464	0.0357833	82.819	51.806	0.503787	0.434315	50.2165	26.8299	0.902715	0.494956
59.421	3.2554	0.539808	0.0548365	83.027	44.539	0.505052	0.373392	50.3423	24.6763	0.904976	0.455227
59.57	1.9443	0.541162	0.0327513	83.234	51.149	0.506311	0.428807	50.4682	26.1941	0.90724	0.483227
59.718	1	0.542506	0.0168448	83.442	60.078	0.507576	0.503664	50.594	24.5407	0.909501	0.452725
59.867	1.4211	0.54386	0.0239381	83.649	60.685	0.508836	0.508752	50.7199	22.1661	0.911764	0.408919
60.016	1.7864	0.545213	0.0300915	83.857	52.347	0.510101	0.438851	50.8457	25.9311	0.914026	0.478375
60.164	2	0.546558	0.0336895	84.064	56.813	0.51136	0.476291	50.9716	29.9288	0.916289	0.552125
60.313	1.9713	0.547911	0.0332061	84.272	49.184	0.512625	0.412334	51.0975	27.2609	0.918552	0.502907
60.461	2.1335	0.549256	0.0359383	84.48	51.458	0.51389	0.431398	51.2233	27.1057	0.920814	0.500044
60.61	3.0772	0.55061	0.0518347	84.687	55.942	0.51515	0.468989	51.3492	26.4497	0.923077	0.487942
60.758	3.4318	0.551954	0.0578079	84.895	55.341	0.516415	0.463951	51.475	29.0405	0.925338	0.535737
60.907	2.4888	0.553308	0.0419233	85.102	54.536	0.517674	0.457202	51.6009	25.9778	0.927602	0.479237
61.055	1.4404	0.554652	0.0242632	85.31	46.558	0.518939	0.390319	51.7267	25.5003	0.929863	0.470428
61.204	2.05	0.556006	0.0345318	85.517	49.428	0.520199	0.414379	51.8526	24.139	0.932126	0.445315
61.352	3.3749	0.55735	0.0568494	85.725	52.158	0.521464	0.437266	51.9785	28.2618	0.93439	0.521372
61.501	2.5624	0.558704	0.043163	85.933	58.237	0.522729	0.48823	52.1043	32.6953	0.936651	0.603161
61.65	1.6091	0.560057	0.0271049	86.14	58.412	0.523988	0.489697	52.2302	27.4797	0.938914	0.506944
61.798	0.8947	0.561402	0.015071	86.348	49.955	0.525254	0.418797	52.356	27.8893	0.941176	0.5145
61.947	1.7094	0.562756	0.0287945	86.555	45.266	0.526513	0.379487	52.4819	26.2484	0.943439	0.484229
62.095	2.4517	0.5641	0.0412983	86.763	47.232	0.527778	0.395969	52.6077	32.3825	0.9457	0.59739
62.244	1.7476	0.565454	0.0294379	86.97	53.736	0.529037	0.450495	52.7336	37.7245	0.947964	0.695939
62.392	1.1109	0.566798	0.0187129	87.178	57.051	0.530302	0.478287	52.8594	30.043	0.950225	0.554231
62.541	2.5416	0.568152	0.0428127	87.385	56.282	0.531562	0.47184	52.9853	29.3052	0.952488	0.540621
62.689	3.2941	0.569496	0.0554884	87.593	70.372	0.532827	0.589963	53.1112	34.5429	0.954751	0.637245
62.838	3.5846	0.57085	0.0603818	87.801	65.309	0.534092	0.547518	53.237	31.3322	0.957013	0.578014
62.987	2.533	0.572203	0.0426678	88.008	57.69	0.535351	0.483644	53.3629	31.7796	0.959276	0.586268
63.135	2.066	0.573548	0.0348013	88.216	59.05	0.536617	0.495045	53.4887	37.3491	0.961538	0.689014
63.284	2.3849	0.574901	0.0401731	88.423	49.041	0.537876	0.411135	53.6146	36.3318	0.963801	0.670247
63.432	2.0415	0.576246	0.0343886	88.631	50.785	0.539141	0.425756	53.7404	36.9358	0.966062	0.681389
63.581	2.9389	0.5776	0.0495051	88.838	50.08	0.5404	0.419845	53.8663	42.3189	0.968325	0.780696
63.729	2	0.578944	0.0336895	89.046	56.494	0.541665	0.473617	53.9921	47.4152	0.970587	0.874713
63.878	2.9941	0.580298	0.0504349	89.254	54.157	0.542931	0.454025	54.118	43.4369	0.97285	0.801321
64.026	4.3375	0.581642	0.0730642	89.461	54.054	0.54419	0.453161	54.2439	41.9333	0.975113	0.773583
64.175	2.222	0.582996	0.0374291	89.669	58.84	0.545455	0.493285	54.3697	45.2839	0.977375	0.835395
64.324	2.0174	0.584349	0.0339826	89.876	60.961	0.546714	0.511066	54.4956	43.7991	0.979638	0.808003
64.472	2	0.585694	0.0336895	90.084	57.753	0.54798	0.484172	54.6214	45.5833	0.9819	0.840918
64.621	1.4724	0.587047	0.0248022	90.291	49.138	0.549239	0.411948	54.7473	42.0247	0.984163	0.775269
64.769	0.5751	0.588392	0.00968743	90.499	51.009	0.550504	0.427634	54.8731	44.8864	0.986424	0.828062
64.918	3.1203	0.589745	0.0525607	90.707	54.256	0.551769	0.454855	54.999	51.3039	0.988687	0.946451
65.066	1.7857	0.59109	0.0300797	90.914	57.799	0.553028	0.484558	55.1248	54.2066	0.990949	1
65.215	1.136	0.592444	0.0191357	91.122	61.995	0.554294	0.519735	55.2507	51.7018	0.993212	0.953792
65.363	2.0871	0.593788	0.0351567	91.329	60.924	0.555553	0.510756	55.3766	34.0385	0.995475	0.62794
65.512	2.2865	0.595142	0.0385156	91.537	60.694	0.556818	0.508828	55.5024	31.8351	0.997737	0.587292
65.661	3.0526	0.596495	0.0514204	91.744	64.799	0.558077	0.543242	55.6283	38	1	0.701022
65.809	2.6843	0.59784	0.0452164	91.952	57.497	0.559343	0.482026
65.958	2.669	0.599193	0.0449587	92.16	58.119	0.560608	0.48724
66.106	2.0897	0.600538	0.0352005	92.367	65.391	0.561867	0.548205
66.255	2.9615	0.601891	0.0498858	92.575	71.533	0.563132	0.599697
66.403	4.3236	0.603236	0.0728301	92.782	74.026	0.564391	0.620597
66.552	2.678	0.604589	0.0451103	92.99	67.516	0.565657	0.56602
66.7	0.7986	0.605934	0.0134522	93.197	56.225	0.566916	0.471362
66.849	1.4765	0.607288	0.0248713	93.405	55.6	0.568181	0.466122
66.998	2.1849	0.608641	0.0368041	93.612	55.198	0.56944	0.462752
67.146	2.308	0.609986	0.0388777	93.82	52.276	0.570706	0.438256
67.295	1.7291	0.611339	0.0291263	94.028	49.027	0.571971	0.411018
67.443	1.4525	0.612684	0.024467	94.235	52.437	0.57323	0.439605
67.592	1.614	0.614037	0.0271875	94.443	47.296	0.574495	0.396506
67.74	1.2663	0.615382	0.0213305	94.65	52.082	0.575754	0.436629
67.889	1.1724	0.616735	0.0197488	94.858	55.179	0.57702	0.462593
68.037	1.8381	0.61808	0.0309624	95.065	50.4	0.578279	0.422528
68.186	1.7194	0.619433	0.0289629	95.273	55.253	0.579544	0.463213
68.334	1.3505	0.620778	0.0227489	95.481	66.431	0.580809	0.556924
68.483	2.4752	0.622132	0.0416942	95.688	53.654	0.582069	0.449808
68.632	1.7621	0.623485	0.0296822	95.896	59.632	0.583334	0.499925
68.78	1.9753	0.62483	0.0332735	96.103	69.316	0.584593	0.58111
68.929	2.1026	0.626183	0.0354178	96.311	68.411	0.585858	0.573523
69.077	2.9558	0.627528	0.0497898	96.518	62.154	0.587117	0.521068
69.226	2.634	0.628881	0.0443691	96.726	65.457	0.588383	0.548758
69.374	2.7408	0.630226	0.0461682	96.934	54.454	0.589648	0.456515
69.523	2.1053	0.631579	0.0354633	97.141	53.134	0.590907	0.445449
69.671	2.0085	0.632924	0.0338327	97.349	53.085	0.592172	0.445038
69.82	1.5813	0.634278	0.0266366	97.556	55.472	0.593432	0.465049
69.969	2.1816	0.635631	0.0367486	97.764	56.947	0.594697	0.477415
70.117	3.7609	0.636976	0.0633515	97.971	53.411	0.595956	0.447771
70.266	2.6198	0.638329	0.0441299	98.179	53.967	0.597221	0.452432
70.414	2.4628	0.639674	0.0414853	98.386	43.501	0.59848	0.36469
70.563	1.8028	0.641027	0.0303678	98.594	49.187	0.599746	0.412359
70.711	1.2529	0.642372	0.0211048	98.802	49.299	0.601011	0.413298
70.86	1.37	0.643725	0.0230773	99.009	46.562	0.60227	0.390352
71.008	1.8404	0.64507	0.0310011	99.217	54.621	0.603535	0.457915
71.157	2.056	0.646423	0.0346329	99.424	59.761	0.604795	0.501006
71.306	1.3077	0.647777	0.0220279	99.632	51.66	0.60606	0.433091
71.454	1.0526	0.649122	0.0177308	99.839	50.806	0.607319	0.425932
71.603	1.2794	0.650475	0.0215512	100.047	47.96	0.608584	0.402072
71.751	1.81	0.65182	0.030489	100.255	43.045	0.60985	0.360868
71.9	2	0.653173	0.0336895	100.462	50.153	0.611109	0.420457
72.048	2.0457	0.654518	0.0344594	100.67	48.496	0.612374	0.406566
72.197	1.0234	0.655871	0.0172389	100.877	49.254	0.613633	0.412921
72.345	1.0151	0.657216	0.0170991	101.085	45.339	0.614898	0.380099
72.494	1.8475	0.658569	0.0311207	101.292	42.47	0.616158	0.356047
72.643	1.7337	0.659923	0.0292038	101.5	49.504	0.617423	0.415017
72.791	1.9363	0.661267	0.0326165	101.708	49.961	0.618688	0.418848
72.94	3.5173	0.662621	0.0592481	101.915	48.686	0.619947	0.408159
73.088	3.2906	0.663966	0.0554294	102.123	46.341	0.621213	0.3885
73.237	2.4229	0.665319	0.0408132	102.33	50.118	0.622472	0.420164
73.385	2.6667	0.666664	0.04492	102.538	48.598	0.623737	0.407421
73.534	2	0.668017	0.0336895	102.745	43.182	0.624996	0.362016
73.682	2.1542	0.669362	0.036287	102.953	49.539	0.626261	0.41531
73.831	2.4122	0.670715	0.040633	103.161	47.819	0.627527	0.40089
73.98	2.6976	0.672069	0.0454405	103.368	36.67	0.628786	0.307423
74.128	2.2325	0.673413	0.037606	103.576	38.187	0.630051	0.320141
74.277	3.231	0.674767	0.0544255	103.783	39.342	0.63131	0.329823
74.425	2.1956	0.676111	0.0369844	103.991	43.984	0.632576	0.36874
74.574	1.5694	0.677465	0.0264362	104.198	42.698	0.633835	0.357958
74.722	5.5875	0.67881	0.0941202	104.406	45.972	0.6351	0.385406
74.871	3.2055	0.680163	0.0539959	104.613	57.311	0.636359	0.480466
75.019	2.0894	0.681508	0.0351955	104.821	44.41	0.637624	0.372311
75.168	2.835	0.682861	0.0477549	105.029	39.112	0.63889	0.327895
75.316	2.9474	0.684206	0.0496483	105.236	49.282	0.640149	0.413155
75.465	2.8304	0.685559	0.0476774	105.444	45.385	0.641414	0.380485
75.614	1.4623	0.686913	0.0246321	105.651	42.494	0.642673	0.356248
75.762	2.5506	0.688257	0.0429643	105.859	46.228	0.643939	0.387552
75.911	2.0876	0.689611	0.0351651	106.066	46.467	0.645198	0.389556
76.059	1.2798	0.690956	0.0215579	106.274	48.744	0.646463	0.408645
76.208	1.9408	0.692309	0.0326923	106.482	58.342	0.647728	0.48911
76.356	1.5615	0.693654	0.0263031	106.689	50.025	0.648987	0.419384
76.505	2.4489	0.695007	0.0412512	106.897	41.245	0.650253	0.345777
76.653	2.9879	0.696352	0.0503305	107.104	44.989	0.651512	0.377165
76.802	2.471	0.697705	0.0416234	107.312	46.132	0.652777	0.386747
76.951	1.7233	0.699059	0.0290286	107.519	45.788	0.654036	0.383863
77.099	2.5902	0.700403	0.0436313	107.727	49.207	0.655302	0.412527
77.248	4.6491	0.701757	0.078313	107.935	54.959	0.656567	0.460748
77.396	4.3878	0.703101	0.0739115	108.142	47.418	0.657826	0.397529
77.545	2.9025	0.704455	0.048892	108.35	50.082	0.659091	0.419862
77.693	2.5134	0.7058	0.0423377	108.557	46.256	0.660351	0.387787
77.842	3.3657	0.707153	0.0566944	108.765	47.997	0.661616	0.402383
77.99	3.4049	0.708498	0.0573548	108.972	53.907	0.662875	0.451929
78.139	3.0027	0.709851	0.0505798	109.18	49.873	0.66414	0.41811
78.288	3.2534	0.711205	0.0548028	109.388	44.57	0.665405	0.373652
78.436	3.3815	0.712549	0.0569606	109.595	47.829	0.666665	0.400974
78.585	2.9718	0.713903	0.0500593	109.803	49.58	0.66793	0.415654
78.733	2.5897	0.715247	0.0436229	110.01	45.42	0.669189	0.380778
78.882	2.8549	0.716601	0.0480901	110.218	39.975	0.670454	0.33513
79.03	3.2722	0.717945	0.0551195	110.425	47.025	0.671714	0.394234
79.179	2.7193	0.719299	0.045806	110.633	47.131	0.672979	0.395122
79.327	3.3317	0.720644	0.0561217	110.84	43.46	0.674238	0.364347
79.476	2.7384	0.721997	0.0461277	111.048	41.78	0.675503	0.350262
79.625	2.9803	0.723351	0.0502025	111.256	42.477	0.676768	0.356106
79.773	4.6135	0.724695	0.0777134	111.463	37.151	0.678028	0.311455
79.922	2.0436	0.726049	0.034424	111.671	44.499	0.679293	0.373057
80.07	2.3226	0.727393	0.0391237	111.878	49.862	0.680552	0.418018
80.219	3.483	0.728747	0.0586703	112.086	48.362	0.681817	0.405443
80.367	3.0882	0.730091	0.05202	112.293	48.388	0.683077	0.405661
80.516	3.4038	0.731445	0.0573362	112.501	48.161	0.684342	0.403757
80.664	4.8907	0.732789	0.0823827	112.709	40.544	0.685607	0.3399
80.813	4.5786	0.734143	0.0771255	112.916	44.086	0.686866	0.369595
80.962	3.0256	0.735497	0.0509655	113.124	51.448	0.688131	0.431314
81.11	4	0.736841	0.0673791	113.331	47.087	0.689391	0.394754
81.259	3.0414	0.738195	0.0512317	113.539	49.413	0.690656	0.414254
81.407	4.4221	0.739539	0.0744893	113.746	55.194	0.691915	0.462719
81.556	3.1492	0.740893	0.0530476	113.954	47.56	0.69318	0.398719
81.704	3.6249	0.742237	0.0610606	114.162	51.14	0.694446	0.428732
81.853	4.7949	0.743591	0.080769	114.369	50.83	0.695705	0.426133
82.001	4.2806	0.744935	0.0721057	114.577	49.49	0.69697	0.414899
82.15	3.8649	0.746289	0.0651034	114.784	41.809	0.698229	0.350506
82.298	3.8782	0.747633	0.0653274	114.992	47.545	0.699495	0.398593
82.447	4.9938	0.748987	0.0841194	115.199	47.819	0.700754	0.40089
82.596	4.4692	0.750341	0.0752827	115.407	50.755	0.702019	0.425504
82.744	4.9214	0.751685	0.0828999	115.615	53.756	0.703284	0.450663
82.893	9.2828	0.753039	0.156367	115.822	55.573	0.704543	0.465896
83.041	9.6667	0.754383	0.162833	116.03	70.834	0.705809	0.593836
83.19	9.3328	0.755737	0.157209	116.237	56.004	0.707068	0.469509
83.338	10.1137	0.757081	0.170363	116.445	60.743	0.708333	0.509239
83.487	12.3021	0.758435	0.207226	116.652	60.011	0.709592	0.503102
83.635	8.6754	0.759779	0.146135	116.86	60.095	0.710858	0.503806
83.784	5.0626	0.761133	0.0852783	117.067	58.186	0.712117	0.487802
83.933	4.5602	0.762487	0.0768155	117.275	57.271	0.713382	0.480131
84.081	4.0118	0.763831	0.0675779	117.483	55.986	0.714647	0.469358
84.23	4.0199	0.765185	0.0677143	117.69	44.41	0.715906	0.372311
84.378	4.0285	0.766529	0.0678592	117.898	47.989	0.717172	0.402316
84.527	3.9976	0.767883	0.0673387	118.105	46.455	0.718431	0.389455
84.675	3.7041	0.769227	0.0623947	118.313	49.475	0.719696	0.414773
84.824	2.9038	0.770581	0.0489138	118.52	47.088	0.720955	0.394762
84.972	2.3509	0.771925	0.0396004	118.728	49.994	0.722221	0.419124
85.121	2.9573	0.773279	0.049815	118.936	46.194	0.723486	0.387267
85.27	4.6336	0.774633	0.0780519	119.143	45.527	0.724745	0.381675
85.418	3.5128	0.775977	0.0591723	119.351	50.764	0.72601	0.42558
85.567	5.0944	0.777331	0.085814	119.558	46.439	0.727269	0.389321
85.715	5.1822	0.778675	0.087293	119.766	49.541	0.728535	0.415327
85.864	4.8112	0.780029	0.0810436	119.973	53.534	0.729794	0.448802
86.012	3.772	0.781373	0.0635385	120.181	49.514	0.731059	0.4151
86.161	4.3172	0.782727	0.0727222	120.389	45.317	0.732324	0.379915
86.309	6.4522	0.784071	0.108686	120.596	46.303	0.733584	0.388181
86.458	7.7767	0.785425	0.130997	120.804	46.741	0.734849	0.391853
86.607	5.9476	0.786778	0.100186	121.011	49.496	0.736108	0.414949
86.755	7	0.788123	0.117913	121.219	50.781	0.737373	0.425722
86.904	7	0.789477	0.117913	121.426	51.389	0.738632	0.430819
87.052	7.5523	0.790821	0.127217	121.634	53.631	0.739898	0.449615
87.201	13.1745	0.792175	0.221921	121.842	50.698	0.741163	0.425026
87.349	13.161	0.793519	0.221694	122.049	48.496	0.742422	0.406566
87.498	14.8442	0.794873	0.250047	122.257	54.962	0.743687	0.460774
87.646	11.8013	0.796217	0.19879	122.464	50.371	0.744947	0.422285
87.795	20.9664	0.797571	0.353174	122.672	47.641	0.746212	0.399398
87.944	26.3703	0.798924	0.444202	122.879	51.792	0.747471	0.434198
88.092	21.2022	0.800269	0.357146	123.087	48.333	0.748736	0.405199
88.241	15.8222	0.801622	0.266521	123.294	47.874	0.749995	0.401351
88.389	18.984	0.802967	0.319781	123.502	47.484	0.751261	0.398082
88.538	21.8759	0.804321	0.368495	123.71	44.825	0.752526	0.37579
88.686	27.8191	0.805665	0.468606	123.917	44.333	0.753785	0.371665
88.835	30.4035	0.807019	0.51214	124.125	53.519	0.75505	0.448676
88.983	29.5268	0.808363	0.497372	124.332	42.356	0.75631	0.355091
89.132	31.298	0.809717	0.527208	124.54	42.194	0.757575	0.353733
89.28	30.2773	0.811061	0.510014	124.747	46.944	0.758834	0.393555
89.429	31.9044	0.812415	0.537422	124.955	39.186	0.760099	0.328516
89.578	36.0339	0.813768	0.606983	125.163	45.677	0.761365	0.382933
89.726	34.2133	0.815113	0.576315	125.37	48.267	0.762624	0.404646
89.875	31.7959	0.816467	0.535595	125.578	43.968	0.763889	0.368605
90.023	29.176	0.817811	0.491463	125.785	50.091	0.765148	0.419938
90.172	29.2347	0.819165	0.492452	125.993	46.487	0.766413	0.389724
90.32	31.2821	0.820509	0.52694	126.2	49.619	0.767673	0.415981
90.469	30.2675	0.821863	0.509849	126.408	48.274	0.768938	0.404705
90.617	27.4553	0.823207	0.462478	126.616	47.277	0.770203	0.396346
90.766	28.0877	0.824561	0.473131	126.823	48.623	0.771462	0.407631
90.915	29.2772	0.825914	0.493168	127.031	50.329	0.772728	0.421933
91.063	31.9247	0.827259	0.537764	127.238	41.577	0.773987	0.348561
91.212	32.4062	0.828612	0.545875	127.446	45.68	0.775252	0.382958
91.36	34.2846	0.829957	0.577516	127.653	44.234	0.776511	0.370835
91.509	34.3239	0.831311	0.578178	127.861	40.775	0.777776	0.341837
91.657	32.6085	0.832655	0.549283	128.068	39.181	0.779036	0.328474
91.806	26.7842	0.834009	0.451174	128.276	39.013	0.780301	0.327065
91.954	29.7674	0.835353	0.501425	128.484	40.962	0.781566	0.343405
92.103	31.2809	0.836707	0.52692	128.691	45.344	0.782825	0.380141
92.252	32.7319	0.83806	0.551361	128.899	46.595	0.784091	0.390629
92.4	32.8398	0.839405	0.553179	129.106	45.661	0.78535	0.382799
92.549	31.0839	0.840758	0.523601	129.314	49.393	0.786615	0.414086
92.697	32.6842	0.842103	0.550558	129.521	41.841	0.787874	0.350774
92.846	28.4699	0.843456	0.479569	129.729	41.536	0.789139	0.348217
92.994	27.4408	0.844801	0.462234	129.937	45.433	0.790405	0.380887
93.143	27.8876	0.846155	0.46976	130.144	43.74	0.791664	0.366694
93.291	25.523	0.847499	0.429929	130.352	39.23	0.792929	0.328884
93.44	24.3707	0.848853	0.410519	130.559	41.063	0.794188	0.344251
93.589	28.9794	0.850206	0.488151	130.767	43.281	0.795454	0.362846
93.737	26.9753	0.851551	0.454393	130.974	37.452	0.796713	0.313979
93.886	26.3561	0.852904	0.443962	131.182	38.896	0.797978	0.326084
94.034	24.5319	0.854249	0.413234	131.39	43.067	0.799243	0.361052
94.183	28.8916	0.855602	0.486672	131.597	49.001	0.800502	0.4108
94.331	28.0119	0.856947	0.471854	131.805	49.995	0.801768	0.419133
94.48	30.0178	0.8583	0.505643	132.012	47.962	0.803027	0.402089
94.628	28.8246	0.859645	0.485544	132.22	46.198	0.804292	0.387301
94.777	27.5915	0.860999	0.464773	132.427	47.838	0.805551	0.40105
94.926	30.2289	0.862352	0.509199	132.635	54.273	0.806817	0.454997
95.074	30.7552	0.863697	0.518064	132.843	48.841	0.808082	0.409458
95.223	27.8795	0.86505	0.469624	133.05	45.213	0.809341	0.379043
95.371	26.3619	0.866395	0.44406	133.258	40.149	0.810606	0.336589
95.52	28.0689	0.867748	0.472814	133.465	40.665	0.811865	0.340915
95.668	30.5221	0.869093	0.514138	133.673	46.314	0.813131	0.388273
95.817	28.5484	0.870446	0.480891	133.88	42.16	0.81439	0.353448
95.965	26.9112	0.871791	0.453313	134.088	44.159	0.815655	0.370207
96.114	28.8452	0.873144	0.485891	134.295	38.797	0.816914	0.325254
96.262	32.1243	0.874489	0.541127	134.503	46.275	0.81818	0.387946
96.411	31.3148	0.875843	0.527491	134.711	43.771	0.819445	0.366954
96.56	31.6842	0.877196	0.533713	134.918	42.615	0.820704	0.357263
96.708	29.4232	0.878541	0.495627	135.126	41.682	0.821969	0.349441
96.857	27.4422	0.879894	0.462258	135.333	44.546	0.823228	0.373451
97.005	31.8649	0.881239	0.536757	135.541	40.533	0.824494	0.339808
97.154	31.7854	0.882592	0.535418	135.748	41.137	0.825753	0.344872
97.302	27.9822	0.883937	0.471354	135.956	42.371	0.827018	0.355217
97.451	27.2158	0.88529	0.458444	136.164	43.271	0.828283	0.362762
97.599	27.8343	0.886635	0.468862	136.371	49.114	0.829543	0.411747
97.748	30.9873	0.887989	0.521974	136.579	46.699	0.830808	0.391501
97.897	28.6263	0.889342	0.482203	136.786	37.595	0.832067	0.315177
98.045	34.1763	0.890687	0.575692	136.994	42.085	0.833332	0.352819
98.194	28.8294	0.89204	0.485625	137.201	38.095	0.834591	0.319369
98.342	25.5786	0.893385	0.430866	137.409	48.612	0.835857	0.407538
98.491	29.7368	0.894738	0.50091	137.617	47.717	0.837122	0.400035
98.639	30.5814	0.896083	0.515137	137.824	45.408	0.838381	0.380678
98.788	34.8836	0.897436	0.587606	138.032	45.013	0.839646	0.377366
98.936	35.0719	0.898781	0.590778	138.239	43.539	0.840906	0.365009
99.085	31.9833	0.900134	0.538751	138.447	38.444	0.842171	0.322295
99.234	33.0955	0.901488	0.557486	138.654	37.001	0.84343	0.310198
99.382	27.0561	0.902833	0.455754	138.862	49.754	0.844695	0.417112
99.531	26.6311	0.904186	0.448595	139.07	46.354	0.845961	0.388609
99.679	29.8829	0.905531	0.503371	139.277	40.921	0.84722	0.343061
99.828	28.6789	0.906884	0.48309	139.485	38.838	0.848485	0.325598
99.976	27.3852	0.908229	0.461297	139.692	41.4	0.849744	0.347077
100.125	29.7577	0.909582	0.501262	139.9	44.921	0.851009	0.376595
100.273	33.5674	0.910927	0.565435	140.107	49.832	0.852269	0.417766
100.422	30.6491	0.91228	0.516277	140.315	51.873	0.853534	0.434877
100.571	31.3137	0.913634	0.527472	140.522	41.909	0.854793	0.351344
100.719	30.957	0.914978	0.521464	140.73	46.08	0.856058	0.386311
100.868	29.4687	0.916332	0.496394	140.938	41.709	0.857324	0.349667
101.016	32.5328	0.917677	0.548008	141.145	39.972	0.858583	0.335105
101.165	31.2199	0.91903	0.525892	141.353	44.844	0.859848	0.375949
101.313	32.0105	0.920375	0.53921	141.56	43.568	0.861107	0.365252
101.462	36.0378	0.921728	0.607049	141.768	46.917	0.862372	0.393328
101.61	31.787	0.923073	0.535445	141.975	45.884	0.863632	0.384668
101.759	28.7868	0.924426	0.484907	142.183	39.988	0.864897	0.335239
101.908	31.1223	0.92578	0.524248	142.391	42.51	0.866162	0.356382
102.056	30.1492	0.927124	0.507856	142.598	50.119	0.867421	0.420172
102.205	28.8214	0.928478	0.48549	142.806	46.459	0.868687	0.389489
102.353	32.7544	0.929822	0.55174	143.013	45.418	0.869946	0.380762
102.502	33.8172	0.931176	0.569643	143.221	51.911	0.871211	0.435196
102.65	33.1885	0.932521	0.559053	143.428	44.312	0.87247	0.371489
102.799	34.0047	0.933874	0.572801	143.636	49.74	0.873735	0.416995
102.947	31.6867	0.935219	0.533755	143.844	42.12	0.875001	0.353113
103.096	34.8589	0.936572	0.58719	144.051	40.224	0.87626	0.337218
103.244	30.2936	0.937917	0.510289	144.259	39.471	0.877525	0.330905
103.393	32.8863	0.93927	0.553962	144.466	38.175	0.878784	0.32004
103.542	30.5857	0.940624	0.515209	144.674	41.963	0.88005	0.351797
103.69	34.3432	0.941968	0.578503	144.881	45.47	0.881309	0.381197
103.839	32.3877	0.943322	0.545563	145.089	46.984	0.882574	0.39389
103.987	33.6407	0.944667	0.56667	145.297	50.032	0.883839	0.419443
104.136	28.8424	0.94602	0.485844	145.504	45.944	0.885099	0.385171
104.284	38.7368	0.947365	0.652513	145.712	43.132	0.886364	0.361597
104.433	35.499	0.948718	0.597973	145.919	47.031	0.887623	0.394284
104.581	35.0745	0.950063	0.590822	146.127	48.687	0.888888	0.408167
104.73	42.7677	0.951416	0.720412	146.334	44.591	0.890147	0.373828
104.879	45.012	0.95277	0.758217	146.542	51.626	0.891413	0.432806
105.027	40.8237	0.954114	0.687666	146.749	53.249	0.892672	0.446413
105.176	40.9393	0.955468	0.689613	146.957	52.272	0.893937	0.438222
105.324	46.0866	0.956812	0.776318	147.165	39.82	0.895202	0.333831
105.473	43.7362	0.958166	0.736726	147.372	40.202	0.896462	0.337033
105.621	44.6515	0.959511	0.752144	147.58	39.969	0.897727	0.33508
105.77	43.2218	0.960864	0.728061	147.787	42.738	0.898986	0.358294
105.918	43.1176	0.962209	0.726306	147.995	45.059	0.900251	0.377752
106.067	43.2249	0.963562	0.728114	148.202	47.867	0.90151	0.401293
106.216	45.8772	0.964916	0.772791	148.41	48.949	0.902776	0.410364
106.364	48.0974	0.96626	0.81019	148.618	49.211	0.904041	0.41256
106.513	45.161	0.967614	0.760727	148.825	46.382	0.9053	0.388843
106.661	45.5756	0.968958	0.767711	149.033	47.482	0.906565	0.398065
106.81	43.933	0.970312	0.740041	149.24	44.746	0.907825	0.375128
106.958	43.6509	0.971656	0.735289	149.448	44.457	0.90909	0.372705
107.107	52.9136	0.97301	0.891318	149.655	48.973	0.910349	0.410565
107.255	56.1302	0.974355	0.9455	149.863	54.261	0.911614	0.454897
107.404	56.7555	0.975708	0.956033	150.071	50.044	0.91288	0.419544
107.553	52.9815	0.977062	0.892461	150.278	58.373	0.914139	0.48937
107.701	56.9323	0.978406	0.959012	150.486	51.759	0.915404	0.433921
107.85	59.3656	0.97976	1	150.693	47.116	0.916663	0.394997
107.998	54.8455	0.981104	0.92386	150.901	49.505	0.917928	0.415025
108.147	46.5088	0.982458	0.78343	151.108	45.331	0.919188	0.380032
108.295	52.5814	0.983802	0.885722	151.316	48.871	0.920453	0.40971
108.444	47.2637	0.985156	0.796146	151.523	49.767	0.921712	0.417221
108.592	42.6001	0.9865	0.717589	151.731	49.024	0.922977	0.410992
108.741	46.4481	0.987854	0.782408	151.939	45.227	0.924243	0.37916
108.89	48.8642	0.989208	0.823106	152.146	45.017	0.925502	0.3774
109.038	56.6663	0.990552	0.954531	152.354	43.662	0.926767	0.36604
109.187	48.2691	0.991906	0.813082	152.561	44.289	0.928026	0.371297
109.335	40.7384	0.99325	0.686229	152.769	43.999	0.929291	0.368865
109.484	46.8182	0.994604	0.788642	152.976	43.779	0.930551	0.367021
109.632	50.2196	0.995948	0.845938	153.184	51.305	0.931816	0.430115
109.781	42.8829	0.997302	0.722353	153.392	52.277	0.933081	0.438264
109.929	40.2782	0.998646	0.678477	153.599	44.994	0.93434	0.377207
110.078	48	1	0.808549	153.807	45.682	0.935606	0.382975
				154.014	49.039	0.936865	0.411118
				154.222	51.99	0.93813	0.435858
				154.429	50.825	0.939389	0.426091
				154.637	50.402	0.940654	0.422545
				154.845	48.825	0.94192	0.409324
				155.052	47.934	0.943179	0.401854
				155.26	49.63	0.944444	0.416073
				155.467	49.789	0.945703	0.417406
				155.675	51.843	0.946969	0.434626
				155.882	58.229	0.948228	0.488163
				156.09	51.646	0.949493	0.432974
				156.298	49.722	0.950758	0.416844
				156.505	56.404	0.952017	0.472863
				156.713	54.144	0.953283	0.453916
				156.92	56.09	0.954542	0.47023
				157.128	61.405	0.955807	0.514788
				157.335	58.545	0.957066	0.490812
				157.543	49.155	0.958332	0.412091
				157.751	53.837	0.959597	0.451342
				157.958	54.393	0.960856	0.456003
				158.166	60.975	0.962121	0.511184
				158.373	51.84	0.96338	0.4346
				158.581	49.438	0.964646	0.414463
				158.788	51.423	0.965905	0.431104
				158.996	51.773	0.96717	0.434039
				159.203	48.539	0.968429	0.406926
				159.411	45.314	0.969695	0.37989
				159.619	50.502	0.97096	0.423383
				159.826	50.27	0.972219	0.421438
				160.034	56.354	0.973484	0.472443
				160.241	51.93	0.974743	0.435355
				160.449	62.27	0.976009	0.52204
				160.656	69.507	0.977268	0.582712
				160.864	63.718	0.978533	0.53418
				161.072	59.31	0.979798	0.497225
				161.279	56.831	0.981058	0.476442
				161.487	55.39	0.982323	0.464362
				161.694	55.09	0.983582	0.461847
				161.902	56.047	0.984847	0.46987
				162.109	92.235	0.986106	0.773252
				162.317	119.282	0.987372	1
				162.525	83.146	0.988637	0.697054
				162.732	50.732	0.989896	0.425311
				162.94	51.517	0.991161	0.431892
				163.147	58.467	0.992421	0.490158
				163.355	30.983	0.993686	0.259746
				163.562	18.277	0.994945	0.153225
				163.77	11.041	0.99621	0.0925622
				163.977	8.245	0.997469	0.0691219
				164.185	4.155	0.998735	0.0348334
				164.393	4.064	1	0.0340705

## Sheet: 4-cells
1				2				3				4				5
X	Y			X	Y			X	Y			X	Y			X	Y
0	17	0	0.139822	0	13	0	0.148965	0	13	0	0.381799	0	14	0	0.265142	0	17	0	0.299904
0.1304	18.967	0.00309609	0.156	0.1576	37.9474	0.00191532	0.434835	0.1622	18.6489	0.00195347	0.547703	0.1622	11.351	0.00440605	0.214974	0.1894	33.0756	0.00276231	0.583499
0.2608	12.408	0.00619217	0.102054	0.3153	53.6244	0.00383185	0.614475	0.3243	16.75	0.00390573	0.491934	0.3243	12.2731	0.00880939	0.232437	0.3788	28.9446	0.00552461	0.510623
0.3912	17.57	0.00928826	0.14451	0.4729	58.9654	0.00574717	0.675677	0.4865	17.3584	0.00585919	0.509802	0.4865	12.9416	0.0132154	0.245098	0.5682	28.0279	0.00828692	0.494451
0.5216	17.32	0.0123843	0.142454	0.6305	65.3177	0.00766249	0.748467	0.6487	15.1406	0.00781266	0.444667	0.6487	9.5068	0.0176215	0.180047	0.7576	29.0681	0.0110492	0.512801
0.652	17.49	0.0154804	0.143852	0.7882	52.7268	0.00957902	0.60419	0.8109	16.2778	0.00976613	0.478066	0.8109	5.4405	0.0220275	0.103036	0.947	20.4644	0.0138115	0.36102
0.7824	19.857	0.0185765	0.163321	0.9458	47.8082	0.0114943	0.547828	0.973	18.2441	0.0117184	0.535814	0.973	8.9548	0.0264309	0.169593	1.1365	29.4795	0.0165753	0.520059
0.9128	18.802	0.0216726	0.154643	1.1034	50.0849	0.0134097	0.573917	1.1352	14.4253	0.0136719	0.423659	1.1352	9.8976	0.0308369	0.187448	1.3259	20.6873	0.0193376	0.364953
1.0432	12.916	0.0247687	0.106232	1.2611	53.6064	0.0153262	0.614269	1.2974	15.7188	0.0156253	0.461648	1.2974	8.1233	0.035243	0.153845	1.5153	28.1602	0.0220999	0.496785
1.1736	14.017	0.0278648	0.115287	1.4187	54.8252	0.0172415	0.628235	1.4595	16.5625	0.0175776	0.486427	1.4595	8.9279	0.0396463	0.169083	1.7047	24.4583	0.0248622	0.431478
1.304	19.372	0.0309609	0.159331	1.5763	44.8875	0.0191568	0.51436	1.6217	17.9277	0.019531	0.526522	1.6217	9.0985	0.0440524	0.172314	1.8941	24.6409	0.0276245	0.4347
1.4343	16.07	0.0340546	0.132173	1.734	42.2111	0.0210734	0.483692	1.7839	16.5596	0.0214845	0.486342	1.7839	7.845	0.0484584	0.148574	2.0835	23.7423	0.0303868	0.418847
1.5647	12.643	0.0371507	0.103987	1.8916	50.8613	0.0229887	0.582813	1.9461	17.1406	0.023438	0.503405	1.9461	7.8062	0.0528645	0.14784	2.2729	28.0264	0.0331491	0.494424
1.6951	11.804	0.0402467	0.0970859	2.0492	46.7725	0.024904	0.53596	2.1082	16.9722	0.0253902	0.49846	2.1082	6.2271	0.0572678	0.117933	2.4623	26.5236	0.0359114	0.467913
1.8255	14.101	0.0433428	0.115978	2.2069	48.7691	0.0268205	0.558839	2.2704	16.4609	0.0273437	0.483443	2.2704	8.5654	0.0616739	0.162218	2.6517	28.4886	0.0386737	0.502578
1.9559	12.576	0.0464389	0.103436	2.3645	62.0762	0.0287358	0.711323	2.4326	16.9546	0.0292972	0.497943	2.4326	10.028	0.0660799	0.189918	2.8411	36.3138	0.041436	0.640626
2.0863	11.678	0.049535	0.0960496	2.5221	61.3016	0.0306512	0.702447	2.5947	14.375	0.0312494	0.422182	2.5947	10.6524	0.0704833	0.201743	3.0305	30.9956	0.0441984	0.546805
2.2167	17.629	0.0526311	0.144996	2.6797	62.3346	0.0325665	0.714284	2.7569	13.7427	0.0332029	0.403612	2.7569	8.0061	0.0748893	0.151626	3.2199	24.9887	0.0469607	0.440835
2.3471	17.26	0.0557272	0.141961	2.8374	65.4709	0.034483	0.750223	2.9191	11.6641	0.0351564	0.342565	2.9191	5.6742	0.0792954	0.107462	3.4094	23.4215	0.0497244	0.413188
2.4775	15.384	0.0588233	0.126531	2.995	58.4204	0.0363983	0.669432	3.0813	13.4126	0.0371098	0.393917	3.0813	7.1944	0.0837014	0.136253	3.5988	17.6869	0.0524867	0.312021
2.6079	17.355	0.0619193	0.142742	3.1526	47.6682	0.0383136	0.546224	3.2434	14.7109	0.0390621	0.432047	3.2434	9.9219	0.0881047	0.187908	3.7882	17.4878	0.055249	0.308509
2.7383	18.38	0.0650154	0.151172	3.3103	42.33	0.0402302	0.485054	3.4056	17.2119	0.0410156	0.505499	3.4056	9.012	0.0925108	0.170676	3.9776	23.162	0.0580113	0.40861
2.8687	19.385	0.0681115	0.159438	3.4679	48.6747	0.0421455	0.557757	3.5678	15.7852	0.042969	0.463598	3.5678	10.3731	0.0969169	0.196454	4.167	25.3756	0.0607736	0.447661
2.9991	16.957	0.0712076	0.139469	3.6255	53.1405	0.0440608	0.60893	3.7299	12.9531	0.0449213	0.380422	3.7299	12.221	0.10132	0.23145	4.3564	21.6174	0.063536	0.381361
3.1295	20.02	0.0743037	0.164661	3.7832	51.6069	0.0459773	0.591357	3.8921	12.9375	0.0468748	0.379964	3.8921	9.9394	0.105726	0.18824	4.5458	21.0347	0.0662983	0.371081
3.2599	25.33	0.0773998	0.208335	3.9408	43.8245	0.0478927	0.502179	4.0543	11.9214	0.0488282	0.350122	4.0543	12.003	0.110132	0.227322	4.7352	19.7245	0.0690606	0.347967
3.3903	25.265	0.0804958	0.2078	4.0984	44.7917	0.049808	0.513263	4.2165	16.1855	0.0507817	0.475355	4.2165	9.482	0.114538	0.179577	4.9246	17.0646	0.0718229	0.301043
3.5207	32.628	0.0835919	0.26836	4.2561	36.3175	0.0517245	0.416158	4.3786	12.1045	0.0527339	0.355499	4.3786	9.0119	0.118942	0.170674	5.114	19.7525	0.0745852	0.348461
3.6511	31.802	0.086688	0.261566	4.4137	47.271	0.0536398	0.541672	4.5408	11.3281	0.0546874	0.332697	4.5408	8.0969	0.123348	0.153345	5.3034	22.4326	0.0773475	0.395742
3.7815	38.966	0.0897841	0.320489	4.5713	53.9136	0.0555552	0.617789	4.703	8.5181	0.0566409	0.25017	4.703	8.7844	0.127754	0.166366	5.4928	25.2517	0.0801098	0.445475
3.9119	30.896	0.0928802	0.254114	4.729	52.578	0.0574717	0.602485	4.8651	11.0703	0.0585931	0.325126	4.8651	6.4867	0.132157	0.12285	5.6823	22.9457	0.0828736	0.404794
4.0423	27.631	0.0959763	0.22726	4.8866	45.8311	0.059387	0.525173	5.0273	8.9287	0.0605466	0.262229	5.0273	6.7868	0.136563	0.128533	5.8717	17.6597	0.0856359	0.311542
4.1726	33.823	0.09907	0.278189	5.0442	53.2992	0.0613023	0.610749	5.1895	6	0.0625001	0.176215	5.1895	7.8533	0.140969	0.148732	6.0611	18.4611	0.0883982	0.325679
4.303	33.759	0.102166	0.277662	5.2019	54.6836	0.0632189	0.626613	5.3517	6.0645	0.0644535	0.178109	5.3517	6.4118	0.145375	0.121431	6.2505	22.6884	0.0911605	0.400255
4.4334	33.69	0.105262	0.277095	5.3595	50.6714	0.0651342	0.580637	5.5138	6.1992	0.0664058	0.182065	5.5138	4.9835	0.149779	0.0943813	6.4399	17.5154	0.0939228	0.308996
4.5638	26.969	0.108358	0.221816	5.5171	48.2497	0.0670495	0.552887	5.676	3.2588	0.0683593	0.0957083	5.676	7.0231	0.154185	0.133009	6.6293	20.1438	0.0966851	0.355364
4.6942	32.183	0.111454	0.2647	5.6748	49.302	0.068966	0.564945	5.8382	5.4453	0.0703127	0.159924	5.8382	8.3595	0.158591	0.158318	6.8187	31.9236	0.0994474	0.563176
4.8246	38.827	0.11455	0.319346	5.8324	46.584	0.0708813	0.5338	6.0004	5.665	0.0722662	0.166376	6.0004	12.6446	0.162997	0.239473	7.0081	31.1088	0.10221	0.548802
4.955	31.415	0.117647	0.258383	5.99	50.4365	0.0727967	0.577946	6.1625	8.2754	0.0742185	0.243042	6.1625	11.1464	0.1674	0.211099	7.1975	29.2588	0.104972	0.516166
5.0854	36.636	0.120743	0.301325	6.1477	49.0214	0.0747132	0.56173	6.3247	7.4414	0.0761719	0.218548	6.3247	4.5391	0.171806	0.0859649	7.3869	15.381	0.107734	0.271342
5.2158	33.301	0.123839	0.273895	6.3053	51.9913	0.0766285	0.595762	6.4869	6.8125	0.0781254	0.200078	6.4869	6.002	0.176212	0.11367	7.5763	14.0712	0.110497	0.248235
5.3462	27.093	0.126935	0.222835	6.4629	67.0702	0.0785438	0.768549	6.649	5.4141	0.0800777	0.159008	6.649	7.4864	0.180616	0.141783	7.7657	11.2596	0.113259	0.198635
5.4766	30.946	0.130031	0.254526	6.6206	63.0087	0.0804604	0.722009	6.8112	4.7656	0.0820311	0.139962	6.8112	8.811	0.185022	0.166869	7.9552	17.3202	0.116023	0.305552
5.607	37.406	0.133127	0.307658	6.7782	58.578	0.0823757	0.671238	6.9734	3.5571	0.0839846	0.104469	6.9734	9.3975	0.189428	0.177977	8.1446	16.888	0.118785	0.297928
5.7374	31.674	0.136223	0.260513	6.9358	57.1023	0.084291	0.654328	7.1356	2.9844	0.0859381	0.0876494	7.1356	6.6494	0.193834	0.125931	8.334	17.3957	0.121547	0.306884
5.8678	27.077	0.139319	0.222704	7.0934	49.4019	0.0862063	0.56609	7.2977	3.6519	0.0878903	0.107253	7.2977	6.1989	0.198237	0.117399	8.5234	16.4827	0.12431	0.290778
5.9982	40.054	0.142415	0.329438	7.2511	51.5145	0.0881228	0.590298	7.4599	2.4336	0.0898438	0.0714728	7.4599	7.5734	0.202643	0.143431	8.7128	28.3996	0.127072	0.501008
6.1286	29.281	0.145511	0.240831	7.4087	56.1913	0.0900382	0.643889	7.6221	2.9004	0.0917972	0.0851824	7.6221	6.1558	0.207049	0.116583	8.9022	14.8532	0.129834	0.262031
6.259	27.849	0.148607	0.229053	7.5663	56.0011	0.0919535	0.64171	7.7842	2.375	0.0937495	0.0697518	7.7842	4.4447	0.211452	0.0841771	9.0916	17.9603	0.132597	0.316845
6.3894	36.425	0.151703	0.29959	7.724	52.1449	0.09387	0.597522	7.9464	2.3276	0.095703	0.0683597	7.9464	3.0585	0.215859	0.0579242	9.281	17.9715	0.135359	0.317042
6.5198	35.864	0.1548	0.294975	7.8816	53.9023	0.0957853	0.61766	8.1086	3.0059	0.0976564	0.0882808	8.1086	3.0719	0.220265	0.0581779	9.4704	17.9286	0.138121	0.316285
6.6502	32.975	0.157896	0.271214	8.0392	52.6951	0.0977006	0.603827	8.2708	1.3345	0.0996099	0.0391932	8.2708	3.2635	0.224671	0.0618066	9.6598	19.2331	0.140883	0.339298
6.7806	28.413	0.160992	0.233692	8.1969	52.4989	0.0996172	0.601578	8.4329	2.6641	0.101562	0.0782424	8.4329	3.3386	0.229074	0.0632289	9.8492	22.1626	0.143646	0.390979
6.911	26.751	0.164088	0.220023	8.3545	52.9258	0.101532	0.60647	8.5951	2.6528	0.103516	0.0779106	8.5951	7.5409	0.23348	0.142815	10.0387	25.7929	0.14641	0.455022
7.0413	29.104	0.167181	0.239376	8.5121	45.0297	0.103448	0.51599	8.7573	2.75	0.105469	0.0807652	8.7573	3.5775	0.237886	0.0677534	10.2281	21.5805	0.149172	0.38071
7.1717	22.104	0.170278	0.181802	8.6698	50.8672	0.105364	0.582881	8.9194	1.375	0.107421	0.0403826	8.9194	5.1489	0.242289	0.0975137	10.4175	16.1492	0.151934	0.284894
7.3021	34.99	0.173374	0.287787	8.8274	56.7997	0.10728	0.650861	9.0816	1.6562	0.109375	0.0486412	9.0816	3.826	0.246695	0.0724597	10.6069	19.0408	0.154696	0.335906
7.4325	21.751	0.17647	0.178898	8.985	40.1009	0.109195	0.459511	9.2438	2.1099	0.111328	0.061966	9.2438	6.2274	0.251102	0.117939	10.7963	24.6467	0.157459	0.434802
7.5629	33.044	0.179566	0.271781	9.1427	43.1358	0.111112	0.494288	9.406	1.9824	0.113282	0.0582215	9.406	5.3673	0.255508	0.10165	10.9857	18.5176	0.160221	0.326676
7.6933	26.058	0.182662	0.214323	9.3003	42.249	0.113027	0.484126	9.5681	3.4985	0.115234	0.102748	9.5681	6.2527	0.259911	0.118418	11.1751	18.1572	0.162983	0.320318
7.8237	30.487	0.185758	0.250751	9.4579	45.9047	0.114942	0.526016	9.7303	2.9062	0.117187	0.0853527	9.7303	5.9842	0.264317	0.113333	11.3645	24.828	0.165746	0.438
7.9541	30.742	0.188854	0.252848	9.6156	44.3099	0.116859	0.507742	9.8925	1.7056	0.119141	0.0500921	9.8925	6.3526	0.268723	0.12031	11.5539	20.6911	0.168508	0.36502
8.0845	26.819	0.19195	0.220582	9.7732	49.6566	0.118774	0.569009	10.0546	2.3398	0.121093	0.068718	10.0546	6.4453	0.273126	0.122066	11.7433	15.1675	0.17127	0.267576
8.2149	25.255	0.195046	0.207718	9.9308	54.4518	0.120689	0.623956	10.2168	2.2417	0.123047	0.0658369	10.2168	6.8074	0.277532	0.128924	11.9327	16.3421	0.174033	0.288297
8.3453	19.958	0.198142	0.164151	10.0885	63.0387	0.122606	0.722353	10.379	2	0.125	0.0587384	10.379	8.2723	0.281938	0.156667	12.1221	13.2405	0.176795	0.233581
8.4757	28.43	0.201238	0.233832	10.2461	52.0947	0.124521	0.596947	10.5412	1.2974	0.126954	0.0381036	10.5412	8.8427	0.286344	0.16747	12.3116	18.0173	0.179559	0.31785
8.6061	27.517	0.204335	0.226323	10.4037	61.7272	0.126436	0.707324	10.7033	2.668	0.128906	0.078357	10.7033	6.8777	0.290748	0.130255	12.501	25.2384	0.182321	0.44524
8.7365	25.77	0.207431	0.211954	10.5614	56.392	0.128353	0.646189	10.8655	1.9409	0.130859	0.0570026	10.8655	5.7747	0.295154	0.109366	12.6904	27.0705	0.185083	0.477561
8.8669	34.18	0.210527	0.281125	10.719	58.5013	0.130268	0.670359	11.0277	1.1016	0.132813	0.0323531	11.0277	12.0131	0.29956	0.227513	12.8798	26.4891	0.187846	0.467304
8.9973	34.074	0.213623	0.280253	10.8766	52.4135	0.132184	0.6006	11.1898	1.4956	0.134765	0.0439245	11.1898	9.2747	0.303963	0.175651	13.0692	20.4285	0.190608	0.360387
9.1277	27.721	0.216719	0.228001	11.0343	53.6721	0.1341	0.615022	11.352	2.627	0.136719	0.0771528	11.352	7.8356	0.308369	0.148396	13.2586	18.7877	0.19337	0.331441
9.2581	27.033	0.219815	0.222342	11.1919	54.5019	0.136016	0.62453	11.5142	2.2173	0.138672	0.0651203	11.5142	6.3929	0.312775	0.121074	13.448	28.3592	0.196132	0.500295
9.3885	25.36	0.222911	0.208582	11.3495	50.6992	0.137931	0.580956	11.6764	2.4688	0.140625	0.0725066	11.6764	8.1101	0.317181	0.153595	13.6374	35.4021	0.198895	0.624542
9.5189	24.189	0.226007	0.198951	11.5071	43.7038	0.139846	0.500796	11.8385	3.5225	0.142578	0.103453	11.8385	10.7245	0.321585	0.203109	13.8268	28.3024	0.201657	0.499293
9.6493	27.318	0.229103	0.224686	11.6648	41.7419	0.141763	0.478315	12.0007	1.293	0.144531	0.0379743	12.0007	9.6094	0.325991	0.18199	14.0162	19.3051	0.204419	0.340569
9.7796	24.943	0.232197	0.205152	11.8224	44.9963	0.143678	0.515607	12.1629	1.7778	0.146485	0.0522125	12.1629	8.5111	0.330397	0.16119	14.2056	17.6702	0.207182	0.311727
9.91	23.349	0.235293	0.192042	11.98	42.1549	0.145593	0.483048	12.325	1.6406	0.148437	0.0481831	12.325	11.1696	0.3348	0.211538	14.395	20.9815	0.209944	0.370143
10.0404	24.345	0.238389	0.200234	12.1377	43.0127	0.14751	0.492877	12.4872	1.8896	0.15039	0.055496	12.4872	12.6699	0.339206	0.239952	14.5845	30.9207	0.212708	0.545484
10.1708	23.741	0.241485	0.195266	12.2953	53.9664	0.149425	0.618394	12.6494	2.168	0.152344	0.0636724	12.6494	13.4947	0.343612	0.255573	14.7739	33.5087	0.21547	0.59114
10.3012	17.15	0.244581	0.141056	12.4529	48.0911	0.15134	0.55107	12.8116	2.4385	0.154297	0.0716167	12.8116	11.2288	0.348018	0.212659	14.9633	30.2796	0.218232	0.534174
10.4316	14.668	0.247677	0.120642	12.6106	41.5543	0.153257	0.476166	12.9737	0.25	0.15625	0.00734229	12.9737	7.6201	0.352422	0.144315	15.1527	19.5309	0.220995	0.344552
10.562	10.22	0.250773	0.0840578	12.7682	47.9108	0.155172	0.549004	13.1359	1.3218	0.158203	0.0388202	13.1359	8.0247	0.356828	0.151978	15.3421	15.531	0.223757	0.273988
10.6924	11.952	0.25387	0.0983032	12.9258	57.0013	0.157088	0.653171	13.2981	2.4727	0.160157	0.0726212	13.2981	8.9065	0.361234	0.168678	15.5315	22.3971	0.226519	0.395116
10.8228	16.428	0.256966	0.135118	13.0835	46.8594	0.159004	0.536956	13.4602	2.6328	0.162109	0.0773232	13.4602	12.2326	0.365637	0.23167	15.7209	17.0954	0.229282	0.301586
10.9532	14.898	0.260062	0.122534	13.2411	47.2669	0.160919	0.541626	13.6224	1.2656	0.164062	0.0371696	13.6224	8.9944	0.370043	0.170343	15.9103	9.5398	0.232044	0.168295
11.0836	20.945	0.263158	0.172269	13.3987	46.1193	0.162835	0.528475	13.7846	1.9697	0.166016	0.0578485	13.7846	8.2143	0.374449	0.155569	16.0997	14.3714	0.234806	0.253531
11.214	15.616	0.266254	0.128439	13.5564	42.1617	0.164751	0.483126	13.9468	1.5117	0.167969	0.0443974	13.9468	8.978	0.378855	0.170032	16.2891	9.0498	0.237569	0.159651
11.3444	15.117	0.26935	0.124335	13.714	40.4444	0.166667	0.463447	14.1089	1.8125	0.169921	0.0532316	14.1089	7.1013	0.383259	0.13449	16.4785	8.7885	0.240331	0.155041
11.4748	7.162	0.272446	0.0589063	13.8716	45.7178	0.168582	0.523875	14.2711	1.9688	0.171875	0.057822	14.2711	7.9976	0.387665	0.151465	16.6679	6.8701	0.243093	0.121198
11.6052	5.672	0.275542	0.0466513	14.0293	45.9317	0.170499	0.526326	14.4333	2.7886	0.173828	0.0818989	14.4333	11.0057	0.392071	0.208434	16.8574	12.5451	0.245857	0.221313
11.7356	6.008	0.278638	0.0494148	14.1869	43.975	0.172414	0.503904	14.5954	3.1426	0.175781	0.0922956	14.5954	10.0454	0.396474	0.190247	17.0468	11.9194	0.248619	0.210275
11.866	6.805	0.281734	0.05597	14.3445	45.792	0.174329	0.524725	14.7576	2.4307	0.177734	0.0713877	14.7576	9.666	0.40088	0.183062	17.2362	13.4519	0.251382	0.23731
11.9964	4.783	0.28483	0.0393394	14.5022	46.8814	0.176246	0.537208	14.9198	1.4453	0.179688	0.0424473	14.9198	8.3548	0.405286	0.158229	17.4256	9.2578	0.254144	0.16332
12.1268	1.166	0.287926	0.00959016	14.6598	46.1108	0.178161	0.528378	15.082	1.9375	0.181641	0.0569028	15.082	8.63	0.409692	0.163441	17.615	3.4087	0.256906	0.0601342
12.2572	2.014	0.291023	0.0165648	14.8174	49.3928	0.180076	0.565986	15.2441	2.0742	0.183593	0.0609176	15.2441	7.9163	0.414096	0.149925	17.8044	4.5643	0.259668	0.0805206
12.3876	2.986	0.294119	0.0245594	14.9751	49.5403	0.181993	0.567676	15.4063	2.6479	0.185547	0.0777667	15.4063	9.0048	0.418502	0.17054	17.9938	3.3427	0.262431	0.0589698
12.5179	4.378	0.297212	0.0360083	15.1327	42.9357	0.183908	0.491995	15.5685	1.25	0.1875	0.0367115	15.5685	10.0733	0.422908	0.190776	18.1832	1.2055	0.265193	0.0212667
12.6483	2.979	0.300308	0.0245018	15.2903	47.1635	0.185823	0.540441	15.7306	1.4766	0.189452	0.0433665	15.7306	10.2428	0.427311	0.193986	18.3726	1.0804	0.267955	0.0190597
12.7787	3.807	0.303405	0.0313119	15.448	56.655	0.18774	0.649203	15.8928	2.1719	0.191406	0.0637869	15.8928	9.2063	0.431717	0.174356	18.562	0.7651	0.270718	0.0134974
12.9091	3.343	0.306501	0.0274956	15.6056	47.8858	0.189655	0.548717	16.055	2.0703	0.193359	0.060803	16.055	8.9675	0.436123	0.169833	18.7514	0.9595	0.27348	0.0169269
13.0395	4.468	0.309597	0.0367486	15.7632	44.7316	0.191571	0.512574	16.2172	1.6719	0.195313	0.0491023	16.2172	10.7879	0.440529	0.204309	18.9409	0.2143	0.276244	0.00378055
13.1699	4.33	0.312693	0.0356135	15.9209	48.5126	0.193487	0.5559	16.3793	1.4375	0.197265	0.0422182	16.3793	12.4501	0.444932	0.235789	19.1303	1.6308	0.279006	0.0287696
13.3003	3.551	0.315789	0.0292064	16.0785	56.4929	0.195403	0.647345	16.5415	2.0957	0.199219	0.061549	16.5415	14.333	0.449339	0.271449	19.3197	0.5083	0.281768	0.00896711
13.4307	7.464	0.318885	0.0613902	16.2361	56.4648	0.197318	0.647023	16.7037	2.1567	0.201172	0.0633405	16.7037	10.8685	0.453745	0.205836	19.5091	0	0.284531	0
13.5611	7.063	0.321981	0.058092	16.3937	44.0917	0.199233	0.505241	16.8659	2	0.203126	0.0587384	16.8659	13.7558	0.458151	0.260518	19.6985	0.818	0.287293	0.0144307
13.6915	5.491	0.325077	0.0451626	16.5514	43.0563	0.20115	0.493377	17.028	1.8667	0.205078	0.0548234	17.028	8.5646	0.462554	0.162203	19.8879	0.3505	0.290055	0.0061833
13.8219	4.93	0.328173	0.0405484	16.709	52.887	0.203065	0.606026	17.1902	2	0.207031	0.0587384	17.1902	9.4601	0.46696	0.179162	20.0773	0.0871	0.292818	0.00153656
13.9523	3.554	0.331269	0.0292311	16.8666	53.292	0.20498	0.610666	17.3524	1.7275	0.208985	0.0507353	17.3524	13.1091	0.471366	0.24827	20.2667	1.6568	0.29558	0.0292282
14.0827	2.331	0.334365	0.0191721	17.0243	45.0892	0.206897	0.516672	17.5145	2.3047	0.210937	0.0676871	17.5145	9.4228	0.475769	0.178456	20.4561	2.005	0.298342	0.035371
14.2131	2.077	0.337461	0.017083	17.1819	53.6878	0.208812	0.615202	17.6767	2.1006	0.21289	0.0616929	17.6767	7.4772	0.480175	0.141609	20.6455	1.0842	0.301104	0.0191268
14.3435	3.895	0.340558	0.0320357	17.3395	42.7388	0.210727	0.489739	17.8389	1.9512	0.214844	0.0573051	17.8389	5.8792	0.484582	0.111345	20.8349	0.0405	0.303867	0.000714476
14.4739	3.681	0.343654	0.0302756	17.4972	37.7158	0.212644	0.432181	18.0011	2.6484	0.216797	0.0777813	18.0011	10.7258	0.488988	0.203133	21.0243	1.5925	0.306629	0.0280939
14.6043	2.319	0.34675	0.0190734	17.6548	45.1659	0.214559	0.51755	18.1632	2.625	0.21875	0.0770941	18.1632	12.4448	0.493391	0.235689	21.2138	2.7324	0.309393	0.0482033
14.7347	2.885	0.349846	0.0237286	17.8124	41.1257	0.216475	0.471254	18.3254	1.9302	0.220703	0.0566884	18.3254	8.3862	0.497797	0.158824	21.4032	1.2722	0.312155	0.0224434
14.8651	2.433	0.352942	0.020011	17.9701	45.9269	0.218391	0.526271	18.4876	1.418	0.222657	0.0416455	18.4876	5.7357	0.502203	0.108627	21.5926	0.6133	0.314917	0.0108195
14.9955	2.133	0.356038	0.0175436	18.1277	43.4781	0.220306	0.49821	18.6497	3.0469	0.224609	0.089485	18.6497	6.097	0.506606	0.11547	21.782	2.1003	0.31768	0.0370522
15.1259	4.235	0.359134	0.0348322	18.2853	43.4938	0.222222	0.49839	18.8119	2.8984	0.226562	0.0851236	18.8119	6.5231	0.511012	0.123539	21.9714	2.8379	0.320442	0.0500645
15.2562	2.467	0.362228	0.0202907	18.443	45.1855	0.224138	0.517775	18.9741	1.5659	0.228516	0.0459892	18.9741	8.7348	0.515418	0.165426	22.1608	2.7654	0.323204	0.0487855
15.3866	2.651	0.365324	0.021804	18.6006	43.8452	0.226054	0.502417	19.1363	1.7344	0.230469	0.0509379	19.1363	9.8631	0.519825	0.186795	22.3502	1.8803	0.325967	0.0331711
15.517	4.579	0.36842	0.0376615	18.7582	45.8011	0.227969	0.524829	19.2984	2.4609	0.232422	0.0722746	19.2984	13.0927	0.524228	0.247959	22.5396	1.0921	0.328729	0.0192662
15.6474	1.014	0.371516	0.00833998	18.9159	53.6815	0.229886	0.61513	19.4606	2	0.234375	0.0587384	19.4606	7.9922	0.528634	0.151362	22.729	2.1391	0.331491	0.0377367
15.7778	3.938	0.374612	0.0323894	19.0735	53.4828	0.231801	0.612853	19.6228	1.1875	0.236328	0.0348759	19.6228	12.7337	0.53304	0.24116	22.9184	0.8044	0.334254	0.0141907
15.9082	3.56	0.377708	0.0292804	19.2311	52.5891	0.233716	0.602612	19.7849	2.0352	0.238281	0.0597722	19.7849	9.0155	0.537443	0.170742	23.1078	0.1863	0.337016	0.00328659
16.0386	5.202	0.380804	0.0427856	19.3888	52.2288	0.235633	0.598483	19.9471	2.5737	0.240234	0.0755875	19.9471	9.3789	0.541849	0.177625	23.2972	1.105	0.339778	0.0194937
16.169	3.851	0.3839	0.0316738	19.5464	49.4907	0.237548	0.567108	20.1093	3.3828	0.242188	0.0993501	20.1093	10.4556	0.546255	0.198016	23.4867	1.9582	0.342542	0.0345454
16.2994	3.452	0.386996	0.0283921	19.704	41.9912	0.239463	0.481172	20.2715	2.7915	0.244141	0.0819841	20.2715	9.8367	0.550661	0.186295	23.6761	1.1542	0.345304	0.0203617
16.4298	2.484	0.390093	0.0204305	19.8617	51.8942	0.24138	0.594649	20.4336	2.6484	0.246093	0.0777813	20.4336	9.7856	0.555065	0.185327	23.8655	0.0976	0.348067	0.0017218
16.5602	3.522	0.393189	0.0289679	20.0193	48.6163	0.243295	0.557088	20.5958	3.4995	0.248047	0.102777	20.5958	8.8181	0.559471	0.167004	24.0549	0.5348	0.350829	0.00943461
16.6906	3.858	0.396285	0.0317314	20.1769	56.8484	0.24521	0.651419	20.758	3	0.25	0.0881075	20.758	9.1882	0.563877	0.174013	24.2443	0.1495	0.353591	0.00263739
16.821	2.255	0.399381	0.018547	20.3346	54.8444	0.247127	0.628455	20.9201	2.0854	0.251953	0.0612465	20.9201	6.4808	0.56828	0.122738	24.4337	0.7803	0.356354	0.0137656
16.9514	3.091	0.402477	0.025423	20.4922	49.1676	0.249042	0.563405	21.0823	1.8867	0.253906	0.0554108	21.0823	8.1184	0.572686	0.153752	24.6231	0.1797	0.359116	0.00317016
17.0818	4.394	0.405573	0.0361399	20.6498	47.2831	0.250958	0.541811	21.2445	2.5894	0.255859	0.0760486	21.2445	8.0785	0.577092	0.152997	24.8125	1.0478	0.361878	0.0184846
17.2122	3.51	0.408669	0.0288692	20.8074	48.1844	0.252873	0.552139	21.4067	1.1172	0.257813	0.0328112	21.4067	9.4107	0.581498	0.178227	25.0019	1.8308	0.36464	0.0322978
17.3426	1.062	0.411765	0.00873477	20.9651	56.1539	0.25479	0.643461	21.5688	1.7119	0.259765	0.0502771	21.5688	4.6916	0.585902	0.088853	25.1913	3.5484	0.367403	0.0625987
17.473	3.67	0.414861	0.0301851	21.1227	50.7897	0.256705	0.581993	21.731	1.9434	0.261719	0.0570761	21.731	6.163	0.590308	0.11672	25.3807	0.7699	0.370165	0.0135821
17.6034	2.904	0.417957	0.0238849	21.2803	44.1284	0.25862	0.505662	21.8932	1.6001	0.263672	0.0469936	21.8932	8.5886	0.594714	0.162657	25.5702	0.3369	0.372929	0.00594338
17.7338	3.338	0.421053	0.0274545	21.438	38.4306	0.260537	0.440371	22.0553	1.5938	0.265624	0.0468086	22.0553	7.2458	0.599117	0.137226	25.7596	0.0031	0.375691	5.46883e-05
17.8642	3.08	0.424149	0.0253325	21.5956	40.8694	0.262452	0.468317	22.2175	2.5015	0.267578	0.073467	22.2175	11.0012	0.603523	0.208349	25.949	0	0.378453	0
17.9946	3.161	0.427246	0.0259987	21.7532	45.982	0.264367	0.526902	22.3797	2.1836	0.269531	0.0641305	22.3797	13.9094	0.607929	0.263427	26.1384	0	0.381216	0
18.1249	1.236	0.430339	0.0101659	21.9109	46.6574	0.266284	0.534641	22.5419	2	0.271485	0.0587384	22.5419	14.4181	0.612335	0.273061	26.3278	3.7948	0.383978	0.0669455
18.2553	3.101	0.433435	0.0255052	22.0685	43.199	0.268199	0.495012	22.704	2.5391	0.273437	0.0745713	22.704	15.4905	0.616739	0.293371	26.5172	1.3867	0.38674	0.0244633
18.3857	2.88	0.436531	0.0236875	22.2261	46.0964	0.270114	0.528213	22.8662	1.6172	0.275391	0.0474958	22.8662	12.3872	0.621145	0.234598	26.7066	0.6246	0.389503	0.0110188
18.5161	5.492	0.439628	0.0451708	22.3838	50.0035	0.272031	0.572984	23.0284	1.3438	0.277344	0.0394663	23.0284	12.4462	0.625551	0.235715	26.896	2.2121	0.392265	0.0390245
18.6465	5.622	0.442724	0.04624	22.5414	46.4652	0.273946	0.532439	23.1905	2.8286	0.279296	0.0830737	23.1905	13.2077	0.629954	0.250137	27.0854	0.4886	0.395027	0.00861958
18.7769	5.234	0.44582	0.0430488	22.699	42.3317	0.275862	0.485074	23.3527	2.375	0.28125	0.0697518	23.3527	13.3163	0.63436	0.252194	27.2748	0.232	0.39779	0.0040928
18.9073	4.56	0.448916	0.0375052	22.8567	53.9877	0.277778	0.618638	23.5149	1.6484	0.283203	0.0484122	23.5149	13.6926	0.638766	0.259321	27.4642	0.0904	0.400552	0.00159478
19.0377	1.361	0.452012	0.011194	23.0143	58.2723	0.279694	0.667735	23.6771	1.0781	0.285157	0.0316629	23.6771	9.4236	0.643172	0.178471	27.6536	0.2692	0.403314	0.00474906
19.1681	2.792	0.455108	0.0229637	23.1719	61.3632	0.281609	0.703153	23.8392	1.7788	0.287109	0.0522419	23.8392	8.7255	0.647576	0.16525	27.8431	0.0343	0.406078	0.000605099
19.2985	6.621	0.458204	0.0544566	23.3296	56.3731	0.283525	0.645972	24.0014	1.5156	0.289062	0.0445119	24.0014	15.7373	0.651982	0.298045	28.0325	0	0.40884	0
19.4289	5.745	0.4613	0.0472517	23.4872	49.353	0.285441	0.56553	24.1636	2.3247	0.291016	0.0682745	24.1636	13.8344	0.656388	0.262006	28.2219	0	0.411603	0
19.5593	4.008	0.464396	0.0329651	23.6448	51.0403	0.287356	0.584864	24.3257	1.8906	0.292968	0.0555254	24.3257	14.7665	0.660791	0.279659	28.4113	0.6964	0.414365	0.0122855
19.6897	3.79	0.467492	0.0311721	23.8025	49.1819	0.289273	0.563569	24.4879	2.2095	0.294922	0.0648912	24.4879	13.8788	0.665197	0.262847	28.6007	0.2011	0.417127	0.00354768
19.8201	3.751	0.470588	0.0308514	23.9601	41.2159	0.291188	0.472288	24.6501	2.2812	0.296875	0.066997	24.6501	12.3048	0.669603	0.233038	28.7901	0	0.419889	0
19.9505	4.017	0.473684	0.0330392	24.1177	51.082	0.293103	0.585342	24.8123	2.1567	0.298829	0.0633405	24.8123	16.0646	0.674009	0.304243	28.9795	0.5436	0.422652	0.00958986
20.0809	2.106	0.476781	0.0173215	24.2754	51.7937	0.29502	0.593498	24.9744	2.0957	0.300781	0.061549	24.9744	14.6979	0.678413	0.27836	29.1689	1.2652	0.425414	0.0223199
20.2113	1.038	0.479877	0.00853738	24.433	47.6405	0.296935	0.545907	25.1366	2.2153	0.302734	0.0650615	25.1366	13.3048	0.682819	0.251976	29.3583	0.6205	0.428176	0.0109465
20.3417	2.394	0.482973	0.0196903	24.5906	45.1391	0.29885	0.517243	25.2988	2.3516	0.304688	0.0690646	25.2988	14.1514	0.687225	0.26801	29.5477	0	0.430939	0
20.4721	1.036	0.486069	0.00852093	24.7483	47.8288	0.300767	0.548064	25.4609	2.2524	0.30664	0.0661511	25.4609	13.3069	0.691628	0.252016	29.7371	0	0.433701	0
20.6025	0.539	0.489165	0.00443319	24.9059	43.999	0.302682	0.504179	25.6231	2.4707	0.308593	0.0725624	25.6231	12.4204	0.696034	0.235227	29.9265	0.0871	0.436463	0.00153656
20.7329	2.612	0.492261	0.0214833	25.0635	46.7029	0.304597	0.535163	25.7853	2.0474	0.310547	0.0601305	25.7853	15.4493	0.70044	0.29259	30.116	0.4967	0.439227	0.00876247
20.8632	1.548	0.495355	0.012732	25.2211	45.0462	0.306513	0.516179	25.9475	2	0.3125	0.0587384	25.9475	17.0252	0.704846	0.322436	30.3054	0.2191	0.441989	0.00386523
20.9936	1.442	0.498451	0.0118602	25.3788	44.2643	0.308429	0.507219	26.1096	2.2368	0.314453	0.065693	26.1096	13.3507	0.709249	0.252846	30.4948	0	0.444752	0
21.124	1.286	0.501547	0.0105771	25.5364	45.1379	0.310345	0.51723	26.2718	1.9258	0.316406	0.0565592	26.2718	15.625	0.713656	0.295918	30.6842	0	0.447514	0
21.2544	0.966	0.504643	0.00794519	25.694	49.1898	0.31226	0.56366	26.434	2.77	0.31836	0.0813526	26.434	19.6132	0.718062	0.371449	30.8736	0	0.450276	0
21.3848	0.43	0.507739	0.00353668	25.8517	49.6525	0.314177	0.568962	26.5961	2.4609	0.320312	0.0722746	26.5961	16.3567	0.722465	0.309775	31.063	0	0.453039	0
21.5152	1.05	0.510835	0.00863608	26.0093	54.4875	0.316092	0.624365	26.7583	2.8237	0.322265	0.0829298	26.7583	16.7516	0.726871	0.317254	31.2524	0	0.455801	0
21.6456	1.012	0.513931	0.00832353	26.1669	51.2088	0.318007	0.586795	26.9205	3.543	0.324219	0.104055	26.9205	15.564	0.731277	0.294763	31.4418	0	0.458563	0
21.776	1.465	0.517027	0.0120494	26.3246	47.3143	0.319924	0.542169	27.0827	4.2891	0.326172	0.125967	27.0827	12.0573	0.735683	0.22835	31.6312	0	0.461326	0
21.9064	0.316	0.520123	0.00259905	26.4822	39.7876	0.321839	0.455921	27.2448	2.4688	0.328124	0.0725066	27.2448	12.4511	0.740086	0.235808	31.8206	0.0778	0.464088	0.0013725
22.0368	2.033	0.523219	0.0167211	26.6398	43.3182	0.323754	0.496378	27.407	1.7603	0.330078	0.0516986	27.407	12.0658	0.744492	0.228511	32.01	0.3532	0.46685	0.00623094
22.1672	1.551	0.526316	0.0127567	26.7975	60.587	0.325671	0.694259	27.5692	3.2383	0.332031	0.0951062	27.5692	12.5595	0.748898	0.237861	32.1994	0.411	0.469612	0.00725061
22.2976	1.63	0.529412	0.0134065	26.9551	55.4792	0.327586	0.635729	27.7314	3.3203	0.333985	0.0975145	27.7314	16.3833	0.753305	0.310279	32.3889	1.4805	0.472376	0.0261181
22.428	3.109	0.532508	0.025571	27.1127	45.5509	0.329501	0.521962	27.8935	3.0391	0.335937	0.0892559	27.8935	13.9947	0.757708	0.265042	32.5783	0.1769	0.475139	0.00312076
22.5584	0.809	0.535604	0.00665389	27.2704	54.2439	0.331418	0.621574	28.0557	1.7397	0.337891	0.0510936	28.0557	13.351	0.762114	0.252851	32.7677	0.6161	0.477901	0.0108689
22.6888	1.7	0.5387	0.0139822	27.428	54.4444	0.333333	0.623872	28.2179	2.8828	0.339844	0.0846655	28.2179	16.1904	0.76652	0.306626	32.9571	0.4483	0.480663	0.00790863
22.8192	0.963	0.541796	0.00792052	27.5856	52.2016	0.335249	0.598172	28.38	3.4546	0.341796	0.101459	28.38	17.0438	0.770923	0.322788	33.1465	0.0344	0.483425	0.000606864
22.9496	0.071	0.544892	0.000583963	27.7433	42.9775	0.337165	0.492474	28.5422	3.875	0.34375	0.113806	28.5422	17.7089	0.775329	0.335384	33.3359	0.0442	0.486188	0.000779749
23.08	1.642	0.547988	0.0135052	27.9009	44.3915	0.339081	0.508677	28.7044	3.6724	0.345703	0.107855	28.7044	15.2352	0.779735	0.288536	33.5253	0.0142	0.48895	0.000250508
23.2104	1.614	0.551084	0.0132749	28.0585	45.1983	0.340996	0.517922	28.8666	4.2363	0.347657	0.124417	28.8666	21.3811	0.784141	0.404931	33.7147	0.4291	0.491712	0.00756992
23.3408	0.811	0.55418	0.00667034	28.2162	44.0101	0.342912	0.504306	29.0287	6.3213	0.349609	0.185651	29.0287	18.5862	0.788545	0.351999	33.9041	0.8027	0.494475	0.0141607
23.4712	1.307	0.557276	0.0107499	28.3738	42.7158	0.344828	0.489475	29.1909	9.5156	0.351562	0.279465	29.1909	16.504	0.792951	0.312565	34.0935	0	0.497237	0
23.6015	2.186	0.56037	0.0179795	28.5314	43.8152	0.346743	0.502073	29.3531	7.4634	0.353516	0.219194	29.3531	14.4865	0.797357	0.274356	34.2829	2.046e-11	0.499999	3.60943e-13
23.7319	1.764	0.563466	0.0145086	28.6891	44.9141	0.34866	0.514665	29.5152	6.8828	0.355468	0.202142	29.5152	13.271	0.80176	0.251336	34.4724	0.0093	0.502763	0.000164065
23.8623	3.043	0.566562	0.0250282	28.8467	43.7784	0.350575	0.501651	29.6774	9.377	0.357422	0.275395	29.6774	16.3863	0.806166	0.310336	34.6618	0.4013	0.505525	0.00707949
23.9927	0.211	0.569658	0.00173544	29.0043	43.0295	0.35249	0.49307	29.8396	11.9062	0.359375	0.349675	29.8396	14.4964	0.810572	0.274544	34.8512	0.0418	0.508288	0.00073741
24.1231	0.389	0.572754	0.00319946	29.162	40.2791	0.354407	0.461553	30.0018	10.5449	0.361329	0.309695	30.0018	13.4013	0.814978	0.253804	35.0406	0	0.51105	0
24.2535	0.868	0.575851	0.00713916	29.3196	44.0316	0.356322	0.504553	30.1639	9.3008	0.363281	0.273157	30.1639	14.7103	0.819382	0.278595	35.23	0.8453	0.513812	0.0149123
24.3839	0.612	0.578947	0.0050336	29.4772	45.9808	0.358237	0.526888	30.3261	10.355	0.365234	0.304118	30.3261	20.1399	0.823788	0.381424	35.4194	0.0982	0.516575	0.00173238
24.5143	1.238	0.582043	0.0101823	29.6349	41.8008	0.360154	0.47899	30.4883	7.5703	0.367188	0.222333	30.4883	18.0653	0.828194	0.342134	35.6088	0.397	0.519337	0.00700363
24.6447	1.82	0.585139	0.0149692	29.7925	38.8966	0.362069	0.445711	30.6504	6.3369	0.36914	0.18611	30.6504	24.0232	0.832597	0.454969	35.7982	0.1201	0.522099	0.00211873
24.7751	2.128	0.588235	0.0175024	29.9501	55.6093	0.363984	0.63722	30.8126	6.7695	0.371094	0.198815	30.8126	22.5676	0.837003	0.427402	35.9876	0	0.524861	0
24.9055	1.927	0.591331	0.0158493	30.1077	56.6729	0.3659	0.649408	30.9748	5.7505	0.373047	0.168887	30.9748	18.2588	0.841409	0.345799	36.177	0.1989	0.527624	0.00350887
25.0359	1.39	0.594427	0.0114325	30.2654	53.216	0.367816	0.609796	31.137	6	0.375	0.176215	31.137	18.6551	0.845815	0.353304	36.3664	0.3846	0.530386	0.00678488
25.1663	2.371	0.597523	0.0195011	30.423	50.6472	0.369732	0.58036	31.2991	7.4326	0.376953	0.218289	31.2991	21.3656	0.850219	0.404638	36.5558	0.5193	0.533148	0.00916117
25.2967	0.338	0.600619	0.00277999	30.5806	50.2651	0.371647	0.575982	31.4613	4.8184	0.378906	0.141512	31.4613	27.2107	0.854625	0.515337	36.7453	0.2095	0.535912	0.00369587
25.4271	2.381	0.603715	0.0195833	30.7383	49.0099	0.373564	0.561598	31.6235	4.7974	0.38086	0.140896	31.6235	25.8387	0.859031	0.489353	36.9347	0.042	0.538674	0.000740938
25.5575	0.884	0.606811	0.00727075	30.8959	50.2874	0.375479	0.576237	31.7856	5.875	0.382812	0.172544	31.7856	27.5503	0.863434	0.521768	37.1241	0.5688	0.541437	0.0100344
25.6879	1.016	0.609907	0.00835643	31.0535	51.3964	0.377394	0.588945	31.9478	9.5342	0.384765	0.280012	31.9478	23.7147	0.86784	0.449127	37.3135	1.5194	0.544199	0.0268043
25.8183	1.547	0.613004	0.0127238	31.2112	49.8585	0.379311	0.571322	32.11	7.7773	0.386719	0.228413	32.11	20.584	0.872246	0.389835	37.5029	0.7514	0.546961	0.0132557
25.9487	0.619	0.6161	0.00509117	31.3688	53.5887	0.381226	0.614066	32.2722	8.0024	0.388672	0.235024	32.2722	30.353	0.876652	0.574848	37.6923	0	0.549724	0
26.0791	0.852	0.619196	0.00700756	31.5264	54.5173	0.383141	0.624707	32.4343	8.375	0.390625	0.245967	32.4343	31.1763	0.881056	0.59044	37.8817	0	0.552486	0
26.2095	1.802	0.622292	0.0148212	31.6841	49.6088	0.385058	0.568461	32.5965	8.4497	0.392578	0.248161	32.5965	31.9755	0.885462	0.605576	38.0711	0.0879	0.555248	0.00155068
26.3398	0.034	0.625386	0.000279644	31.8417	52.1893	0.386973	0.598031	32.7587	10.2988	0.394531	0.302467	32.7587	32.2774	0.889868	0.611294	38.2605	0.4382	0.558011	0.00773045
26.4702	0.756	0.628482	0.00621797	31.9993	46.9012	0.388888	0.537435	32.9208	8.8711	0.396484	0.260537	32.9208	24.0138	0.894271	0.454791	38.4499	0.6017	0.560773	0.0106148
26.6006	0.105	0.631578	0.000863608	32.157	42.7206	0.390805	0.48953	33.083	10.4375	0.398437	0.306541	33.083	15.1752	0.898677	0.287399	38.6393	0.4075	0.563535	0.00718886
26.731	1.317	0.634674	0.0108321	32.3146	42.7913	0.39272	0.49034	33.2452	9.291	0.400391	0.272869	33.2452	15.1092	0.903083	0.286149	38.8287	0.5667	0.566298	0.00999737
26.8614	0.959	0.63777	0.00788762	32.4722	51.2407	0.394636	0.587161	33.4074	7.4512	0.402344	0.218836	33.4074	12.3184	0.907489	0.233295	39.0182	1.3947	0.569061	0.0246044
26.9918	0.187	0.640866	0.00153804	32.6299	49.3472	0.396552	0.565463	33.5695	5.7886	0.404296	0.170006	33.5695	16.2208	0.911893	0.307202	39.2076	1.1968	0.571824	0.0211132
27.1222	0.037	0.643962	0.000304319	32.7875	41.5286	0.398468	0.475871	33.7317	4.75	0.40625	0.139504	33.7317	20.5994	0.916299	0.390127	39.397	0	0.574586	0
27.2526	1.149	0.647058	0.00945033	32.9451	46.5824	0.400383	0.533782	33.8939	6.6655	0.408203	0.19576	33.8939	22.0893	0.920705	0.418344	39.5864	0.0463	0.577348	0.000816796
27.383	0.814	0.650154	0.00669501	33.1028	54.7066	0.402299	0.626876	34.056	6.5645	0.410156	0.192794	34.056	23.7599	0.925108	0.449983	39.7758	0	0.580111	0
27.5134	0.818	0.65325	0.00672791	33.2604	51.1992	0.404215	0.586685	34.2182	6.6772	0.412109	0.196104	34.2182	27.6276	0.929514	0.523232	39.9652	0.4729	0.582873	0.00834261
27.6438	0.337	0.656346	0.00277177	33.418	45.9106	0.40613	0.526084	34.3804	7.2188	0.414063	0.21201	34.3804	34.8551	0.93392	0.660112	40.1546	0.6737	0.585635	0.011885
27.7742	0.045	0.659442	0.000370118	33.5757	47.3487	0.408047	0.542563	34.5426	6.8804	0.416016	0.202072	34.5426	33.2899	0.938326	0.630469	40.344	0.165	0.588397	0.00291083
27.9046	1.467	0.662539	0.0120658	33.7333	48.6484	0.409962	0.557456	34.7047	5.7578	0.417968	0.169102	34.7047	26.8258	0.942729	0.508047	40.5334	0.1242	0.59116	0.00219106
28.035	0.406	0.665635	0.00333928	33.8909	42.883	0.411877	0.491391	34.8669	8.4082	0.419922	0.246942	34.8669	29.8041	0.947136	0.564452	40.7228	0	0.593922	0
28.1654	0.972	0.668731	0.00799454	34.0486	44.7182	0.413794	0.51242	35.0291	7.5938	0.421875	0.223024	35.0291	28.8194	0.951542	0.545803	40.9122	0	0.596684	0
28.2958	2.002	0.671827	0.0164661	34.2062	42.7566	0.415709	0.489943	35.1912	6.6655	0.423827	0.19576	35.1912	32.0174	0.955945	0.606369	41.1017	0	0.599448	0
28.4262	1.665	0.674923	0.0136943	34.3638	46.0454	0.417624	0.527628	35.3534	7.5898	0.425781	0.222906	35.3534	35.0196	0.960351	0.663227	41.2911	0.0423	0.60221	0.00074623
28.5566	2.003	0.678019	0.0164743	34.5215	47.0753	0.419541	0.53943	35.5156	8.7886	0.427734	0.258114	35.5156	34.0951	0.964757	0.645719	41.4805	0.3319	0.604973	0.00585517
28.687	2.251	0.681115	0.0185141	34.6791	47.1811	0.421456	0.540642	35.6778	12.8906	0.429688	0.378586	35.6778	35.4141	0.969163	0.670699	41.6699	1.4259	0.607735	0.0251548
28.8174	2.994	0.684211	0.0246252	34.8367	40.5513	0.423371	0.464672	35.8399	10.9185	0.43164	0.320667	35.8399	45.2302	0.973566	0.856603	41.8593	0.6773	0.610497	0.0119485
28.9478	1.073	0.687307	0.00882525	34.9943	40.8182	0.425287	0.467731	36.0021	10.9258	0.433594	0.320882	36.0021	52.8018	0.977972	1	42.0487	1.9723	0.61326	0.0347941
29.0782	2.504	0.690403	0.020595	35.152	42.3318	0.427203	0.485075	36.1643	10.3374	0.435547	0.303601	36.1643	46.5374	0.982379	0.88136	42.2381	0.0587	0.616022	0.00103555
29.2085	0.931	0.693497	0.00765732	35.3096	42.535	0.429119	0.487403	36.3264	10.25	0.437499	0.301034	36.3264	47.1076	0.986782	0.892159	42.4275	0.924	0.618784	0.0163006
29.3389	0.703	0.696593	0.00578206	35.4672	47.1581	0.431034	0.540379	36.4886	13.229	0.439453	0.388525	36.4886	48.2609	0.991188	0.914001	42.6169	0.0421	0.621547	0.000742702
29.4693	2.295	0.699689	0.018876	35.6249	49.5563	0.432951	0.567859	36.6508	12.0781	0.441406	0.354724	36.6508	37.1058	0.995594	0.702737	42.8063	1.0989	0.624309	0.0193861
29.5997	2.596	0.702785	0.0213517	35.7825	50.4173	0.434866	0.577726	36.813	11.1216	0.44336	0.326632	36.813	20	1	0.378775	42.9957	0.0114	0.627071	0.000201112
29.7301	3.294	0.705881	0.0270926	35.9401	52.9065	0.436781	0.606249	36.9751	13.7422	0.445312	0.403597					43.1851	0.8339	0.629833	0.0147111
29.8605	0.891	0.708977	0.00732833	36.0978	58.1345	0.438698	0.666156	37.1373	12.8994	0.447265	0.378845					43.3745	2.7285	0.632596	0.0481345
29.9909	1.121	0.712074	0.00922004	36.2554	55.0271	0.440613	0.630549	37.2995	10.7891	0.449219	0.316867					43.564	1.5083	0.63536	0.0266085
30.1213	3.002	0.71517	0.024691	36.413	48.8072	0.442528	0.559276	37.4617	13.0176	0.451172	0.382316					43.7534	0.5506	0.638122	0.00971335
30.2517	0.991	0.718266	0.00815081	36.5707	45.4568	0.444445	0.520884	37.6238	13.5	0.453125	0.396484					43.9428	0.8567	0.640884	0.0151134
30.3821	1.584	0.721362	0.0130281	36.7283	52.6981	0.44636	0.603861	37.786	12.3682	0.455078	0.363244					44.1322	0.2486	0.643646	0.00438565
30.5125	2.349	0.724458	0.0193201	36.8859	49.1296	0.448275	0.56297	37.9482	12.1211	0.457032	0.355987					44.3216	0	0.646409	0
30.6429	4.236	0.727554	0.0348404	37.0436	42.8209	0.450192	0.490679	38.1103	13.2524	0.458984	0.389212					44.511	0.2718	0.649171	0.00479493
30.7733	5.217	0.73065	0.042909	37.2012	43.0077	0.452107	0.49282	38.2725	13.4766	0.460937	0.395797					44.7004	0.9024	0.651933	0.0159196
30.9037	2.319	0.733746	0.0190734	37.3588	42.0202	0.454023	0.481504	38.4347	12.1367	0.462891	0.356445					44.8898	0.4229	0.654696	0.00746054
31.0341	2.978	0.736842	0.0244936	37.5165	43.7775	0.455939	0.501641	38.5969	15.0469	0.464844	0.441915					45.0792	1.4402	0.657458	0.0254071
31.1645	4.827	0.739938	0.0397013	37.6741	46.3025	0.457855	0.530575	38.759	12.2808	0.466796	0.360677					45.2686	1.1548	0.66022	0.0203723
31.2949	3.495	0.743034	0.0287458	37.8317	45.9279	0.45977	0.526282	38.9212	12.5	0.46875	0.367115					45.458	0.1863	0.662983	0.00328659
31.4253	2.337	0.74613	0.0192214	37.9894	38.5625	0.461686	0.441883	39.0834	12.6709	0.470703	0.372134					45.6475	0	0.665746	0
31.5557	3.766	0.749227	0.0309747	38.147	36.813	0.463602	0.421836	39.2455	11.1699	0.472656	0.328051					45.8369	0	0.668509	0
31.6861	4.18	0.752323	0.0343798	38.3046	40.6599	0.465517	0.465917	39.4077	10.459	0.474609	0.307172					46.0263	1.2492	0.671271	0.0220376
31.8165	4.141	0.755419	0.034059	38.4623	39.7108	0.467434	0.455041	39.5699	11.3594	0.476563	0.333616					46.2157	2.2436	0.674033	0.0395802
31.9468	4.709	0.758512	0.0387307	38.6199	38.3639	0.469349	0.439607	39.7321	11.8779	0.478516	0.348844					46.4051	1.797	0.676796	0.0317016
32.0772	7.749	0.761609	0.0637342	38.7775	38.0299	0.471264	0.43578	39.8942	10.8809	0.480468	0.319563					46.5945	1.9171	0.679558	0.0338203
32.2076	12.142	0.764705	0.0998659	38.9352	37.5308	0.473181	0.430061	40.0564	11.0488	0.482422	0.324494					46.7839	1.4467	0.68232	0.0255218
32.338	7.919	0.767801	0.0651325	39.0928	37.7625	0.475096	0.432716	40.2186	10.5	0.484375	0.308376					46.9733	1.1352	0.685083	0.0200265
32.4684	8.097	0.770897	0.0665965	39.2504	41.3894	0.477011	0.474276	40.3807	10.8286	0.486328	0.318027					47.1627	1.4167	0.687845	0.0249925
32.5988	13.812	0.773993	0.113601	39.408	41.8802	0.478927	0.4799	40.5429	8.6035	0.488281	0.252678					47.3521	1.4883	0.690607	0.0262557
32.7292	13.729	0.777089	0.112919	39.5657	43.6066	0.480843	0.499683	40.7051	10.7998	0.490234	0.317181					47.5415	1.1547	0.693369	0.0203705
32.8596	12.113	0.780185	0.0996274	39.7233	41.2878	0.482758	0.473112	40.8673	10.75	0.492188	0.315719					47.7309	0.8878	0.696132	0.015662
32.99	15.679	0.783281	0.128957	39.8809	47.2353	0.484674	0.541263	41.0294	10.0625	0.49414	0.295527					47.9204	1.2509	0.698896	0.0220676
33.1204	20.96	0.786377	0.172393	40.0386	42.8429	0.48659	0.490931	41.1916	11.084	0.496094	0.325528					48.1098	0.1261	0.701658	0.00222458
33.2508	19.676	0.789473	0.161832	40.1962	38.9306	0.488506	0.446101	41.3538	12.6084	0.498047	0.370298					48.2992	0.5359	0.70442	0.00945402
33.3812	19.605	0.792569	0.161248	40.3538	36.4057	0.490421	0.417168	41.5159	11	0.499999	0.323061					48.4886	0.7515	0.707182	0.0132575
33.5116	24.971	0.795665	0.205382	40.5115	40.5813	0.492338	0.465016	41.6781	11.811	0.501953	0.346879					48.678	0.4105	0.709945	0.00724179
33.642	35.203	0.798762	0.289539	40.6691	41.2987	0.494253	0.473237	41.8403	10.6641	0.503906	0.313196					48.8674	1.7304	0.712707	0.0305266
33.7724	42.461	0.801858	0.349235	40.8267	37.9641	0.496168	0.435026	42.0025	9.6084	0.50586	0.282191					49.0568	2.0075	0.715469	0.0354151
33.9028	36.701	0.804954	0.30186	40.9844	43.892	0.498085	0.502953	42.1646	10.1406	0.507812	0.297821					49.2462	1.5856	0.718232	0.0279722
34.0332	32.79	0.80805	0.269692	41.142	38	0.5	0.435437	42.3268	10.832	0.509766	0.318127					49.4356	1.9802	0.720994	0.0349335
34.1636	37.792	0.811146	0.310833	41.2996	33.0316	0.501915	0.378505	42.489	13.3613	0.511719	0.39241					49.625	2.592	0.723756	0.0457265
34.294	54.735	0.814242	0.450186	41.4573	37.1052	0.503832	0.425184	42.6511	11.8442	0.513671	0.347854					49.8144	0.7845	0.726519	0.0138397
34.4244	54.89	0.817338	0.451461	41.6149	33.1282	0.505747	0.379612	42.8133	10.4375	0.515625	0.306541					50.0038	0.8356	0.729281	0.0147411
34.5548	53.991	0.820434	0.444067	41.7725	35.9487	0.507662	0.411932	42.9755	10.5879	0.517578	0.310958					50.1933	2.4086	0.732045	0.042491
34.6852	46.439	0.82353	0.381953	41.9302	33.6081	0.509579	0.385111	43.1377	10.9473	0.519532	0.321513					50.3827	5.4408	0.734807	0.0959832
34.8155	46.356	0.826624	0.38127	42.0878	32.2209	0.511494	0.369215	43.2998	11.311	0.521484	0.332195					50.5721	4.2819	0.737569	0.0755386
34.9459	33.168	0.82972	0.272801	42.2454	34.7471	0.51341	0.398163	43.462	8.9609	0.523437	0.263174					50.7615	5.0181	0.740332	0.0885262
35.0763	37.261	0.832816	0.306466	42.4031	32.9291	0.515326	0.37733	43.6242	10.2612	0.525391	0.301363					50.9509	3.3177	0.743094	0.0585288
35.2067	37.28	0.835912	0.306622	42.5607	34.3187	0.517242	0.393254	43.7863	9.4219	0.527343	0.276713					51.1403	1.7305	0.745856	0.0305284
35.3371	32.494	0.839008	0.267258	42.7183	34.5787	0.519157	0.396233	43.9485	8.8042	0.529297	0.258572					51.3297	3.7427	0.748618	0.0660264
35.4675	33.033	0.842104	0.271691	42.876	26.8775	0.521073	0.307986	44.1107	11.625	0.53125	0.341417					51.5191	8.6298	0.751381	0.152242
35.5979	33.744	0.8452	0.277539	43.0336	25.2938	0.522989	0.289838	44.2729	11.7959	0.533204	0.346436					51.7085	5.7637	0.754143	0.10168
35.7283	35.966	0.848297	0.295814	43.1912	20.387	0.524904	0.233612	44.435	12.4102	0.535156	0.364477					51.8979	0.7514	0.756905	0.0132557
35.8587	42.592	0.851393	0.350312	43.3489	24.4154	0.526821	0.279773	44.5972	8.7065	0.537109	0.255703					52.0873	3.655	0.759668	0.0644793
35.9891	46.076	0.854489	0.378967	43.5065	27.3678	0.528736	0.313604	44.7594	9.2422	0.539063	0.271436					52.2768	1.4256	0.762431	0.0251496
36.1195	51.42	0.857585	0.422921	43.6641	23.6514	0.530651	0.271018	44.9215	10.7559	0.541015	0.315892					52.4662	7.6345	0.765194	0.134683
36.2499	58.329	0.860681	0.479746	43.8217	23.4061	0.532566	0.268208	45.0837	12.832	0.542968	0.376865					52.6556	1.6274	0.767956	0.0287096
36.3803	44.202	0.863777	0.363554	43.9794	22.4185	0.534483	0.256891	45.2459	10.4546	0.544922	0.307043					52.845	3.3015	0.770718	0.058243
36.5107	51.014	0.866873	0.419582	44.137	27.9034	0.536398	0.319742	45.4081	9.7188	0.546875	0.285433					53.0344	4.7477	0.773481	0.083756
36.6411	43.134	0.869969	0.35477	44.2946	28.7496	0.538314	0.329438	45.5702	8.3984	0.548828	0.246654					53.2238	3.6141	0.776243	0.0637577
36.7715	41.567	0.873065	0.341882	44.4523	28.5373	0.54023	0.327005	45.7324	9.7344	0.550781	0.285891					53.4132	4.9154	0.779005	0.0867145
36.9019	39.462	0.876161	0.324568	44.6099	30.4317	0.542145	0.348713	45.8946	8.4668	0.552735	0.248663					53.6026	3.1251	0.781768	0.0551311
37.0323	49.219	0.879257	0.404818	44.7675	29.5091	0.544061	0.338141	46.0567	8.9922	0.554687	0.264094					53.792	3.5659	0.78453	0.0629074
37.1627	55.834	0.882353	0.459225	44.9252	30.2299	0.545977	0.346401	46.2189	9.8135	0.55664	0.288214					53.9814	4.3331	0.787292	0.0764419
37.2931	43.424	0.88545	0.357155	45.0828	28.3439	0.547893	0.324789	46.3811	11.1953	0.558594	0.328797					54.1708	4.0408	0.790055	0.0712853
37.4235	40.498	0.888546	0.333089	45.2404	20.8213	0.549808	0.238589	46.5433	9.8345	0.560547	0.288831					54.3602	7.8359	0.792817	0.138236
37.5538	48.803	0.891639	0.401397	45.3981	24.9667	0.551725	0.28609	46.7054	7.75	0.562499	0.227611					54.5497	6.1987	0.795581	0.109354
37.6842	57.452	0.894735	0.472533	45.5557	25.0994	0.55364	0.287611	46.8676	10.6333	0.564453	0.312291					54.7391	3.5871	0.798343	0.0632814
37.8146	55.996	0.897832	0.460558	45.7133	25	0.555555	0.286472	47.0298	9.6113	0.566406	0.282276					54.9285	3.4249	0.801105	0.06042
37.945	54.141	0.900928	0.445301	45.871	27.7126	0.557472	0.317555	47.1919	11.5347	0.568359	0.338765					55.1179	5.3312	0.803868	0.0940497
38.0754	50.969	0.904024	0.419212	46.0286	23.2289	0.559387	0.266177	47.3541	10.7656	0.570312	0.316177					55.3073	5.2016	0.80663	0.0917634
38.2058	68.284	0.90712	0.561625	46.1862	21.7163	0.561302	0.248844	47.5163	10.0659	0.572266	0.295627					55.4967	6.6008	0.809392	0.116447
38.3362	68.098	0.910216	0.560095	46.3439	25.461	0.563219	0.291754	47.6785	10	0.574219	0.293692					55.6861	7.6028	0.812154	0.134124
38.4666	70.483	0.913312	0.579711	46.5015	29.8106	0.565134	0.341596	47.8406	9.853	0.576171	0.289375					55.8755	6.2368	0.814917	0.110026
38.597	90.663	0.916408	0.745688	46.6591	31.362	0.567049	0.359373	48.0028	9.2188	0.578125	0.270749					56.0649	6.374	0.817679	0.112446
38.7274	79.71	0.919504	0.655602	46.8168	34.0618	0.568966	0.39031	48.165	10.5386	0.580078	0.30951					56.2543	5.635	0.820441	0.0994092
38.8578	67.852	0.9226	0.558071	46.9744	29.1172	0.570881	0.33365	48.3271	10.4199	0.582031	0.306024					56.4437	7.2744	0.823204	0.12833
38.9882	80.588	0.925696	0.662823	47.132	32.3802	0.572797	0.371041	48.4893	9.8159	0.583984	0.288285					56.6331	12.0548	0.825966	0.212663
39.1186	93.318	0.928792	0.767525	47.2897	28.4943	0.574713	0.326513	48.6515	11.1875	0.585937	0.328568					56.8226	16.8281	0.82873	0.296871
39.249	93.422	0.931888	0.76838	47.4473	23.3044	0.576629	0.267042	48.8137	13.8931	0.587891	0.408029					57.012	15.3837	0.831492	0.27139
39.3794	81.834	0.934985	0.673071	47.6049	27.2122	0.578544	0.311821	48.9758	10.8125	0.589843	0.317554					57.2014	17.0986	0.834254	0.301643
39.5098	86.094	0.938081	0.708109	47.7626	27.2161	0.58046	0.311866	49.138	9.938	0.591797	0.291871					57.3908	16.3156	0.837017	0.28783
39.6402	84.844	0.941177	0.697828	47.9202	20.3956	0.582376	0.233711	49.3002	9.875	0.59375	0.290021					57.5802	17.9019	0.839779	0.315814
39.7706	106.134	0.944273	0.872935	48.0778	23.4921	0.584291	0.269193	49.4624	10.0161	0.595704	0.294165					57.7696	11.3302	0.842541	0.19988
39.901	105.163	0.947369	0.864948	48.2354	23.0809	0.586206	0.264481	49.6245	9.5723	0.597656	0.281131					57.959	13.1256	0.845304	0.231554
40.0314	110.737	0.950465	0.910793	48.3931	20.3106	0.588123	0.232737	49.7867	11.0869	0.599609	0.325613					58.1484	13.7109	0.848066	0.241879
40.1618	113.437	0.953561	0.933001	48.5507	17.1477	0.590038	0.196493	49.9489	11.4531	0.601563	0.336368					58.3378	9.3501	0.850828	0.164949
40.2921	113.131	0.956655	0.930484	48.7083	19.9757	0.591953	0.228899	50.111	10.7847	0.603515	0.316738					58.5272	6.5135	0.85359	0.114907
40.4225	117.427	0.959751	0.965818	48.866	20.2035	0.59387	0.231509	50.2732	10.502	0.605469	0.308435					58.7166	10.5057	0.856353	0.185335
40.5529	121.583	0.962847	1	49.0236	16.7768	0.595785	0.192243	50.4354	8.2974	0.607422	0.243688					58.9061	13.5314	0.859117	0.238713
40.6833	119.009	0.965943	0.978829	49.1812	16.6365	0.597701	0.190636	50.5976	9.4688	0.609375	0.278091					59.0955	16.3075	0.861879	0.287687
40.8137	119.025	0.969039	0.978961	49.3389	17.6635	0.599617	0.202404	50.7597	11.4233	0.611328	0.335493					59.2849	13.5226	0.864641	0.238557
40.9441	81.15	0.972135	0.667445	49.4965	18.0084	0.601532	0.206356	50.9219	11.0938	0.613281	0.325816					59.4743	21.2873	0.867403	0.375537
41.0745	64.43	0.975231	0.529926	49.6541	21.2295	0.603448	0.243266	51.0841	11.7046	0.615235	0.343754					59.6637	24.7012	0.870166	0.435763
41.2049	43.596	0.978327	0.35857	49.8118	18.6592	0.605364	0.213813	51.2462	12.2109	0.617187	0.358624					59.8531	16.9503	0.872928	0.299027
41.3353	30.46	0.981423	0.250528	49.9694	17.1099	0.60728	0.19606	51.4084	13.4829	0.61914	0.395982					60.0425	14.0166	0.87569	0.247272
41.4657	20.745	0.98452	0.170624	50.127	16.1954	0.609195	0.185581	51.5706	9.6543	0.621094	0.283539					60.2319	14.7414	0.878453	0.260059
41.5961	12.399	0.987616	0.10198	50.2847	15.7901	0.611112	0.180937	51.7328	11.1567	0.623047	0.327663					60.4213	26.0344	0.881215	0.459283
41.7265	10.659	0.990712	0.0876685	50.4423	18.354	0.613027	0.210316	51.8949	12	0.625	0.35243					60.6107	17.3143	0.883977	0.305448
41.8569	10.486	0.993808	0.0862456	50.5999	18.9789	0.614942	0.217477	52.0571	10.3403	0.626953	0.303686					60.8001	20.9611	0.88674	0.369783
41.9873	7.44	0.996904	0.0611928	50.7576	20.1724	0.616859	0.231153	52.2193	12.8496	0.628906	0.377382					60.9895	27.542	0.889502	0.485879
42.1177	7	1	0.0575738	50.9152	18.5576	0.618774	0.212649	52.3814	9.875	0.630859	0.290021					61.179	18.4023	0.892266	0.324642
				51.0728	17.6897	0.620689	0.202704	52.5436	9.0078	0.632812	0.264552					61.3684	17.274	0.895028	0.304737
				51.2305	17.3264	0.622606	0.198541	52.7058	10.2134	0.634766	0.299959					61.5578	20.8043	0.89779	0.367017
				51.3881	15.3859	0.624521	0.176305	52.868	10.7676	0.636719	0.316236					61.7472	24.5811	0.900553	0.433645
				51.5457	18.6173	0.626436	0.213333	53.0301	10.3271	0.638671	0.303298					61.9366	23.4174	0.903315	0.413115
				51.7034	18.7932	0.628353	0.215349	53.1923	11.2812	0.640625	0.33132					62.126	29.2923	0.906077	0.516757
				51.861	19.9116	0.630268	0.228165	53.3545	12.9258	0.642578	0.37962					62.3154	33.1436	0.90884	0.584699
				52.0186	19.0941	0.632184	0.218797	53.5166	11.1562	0.644531	0.327648					62.5048	29.6519	0.911602	0.523101
				52.1763	18.7026	0.6341	0.214311	53.6788	12.145	0.646484	0.356689					62.6942	33.045	0.914364	0.582959
				52.3339	27.2645	0.636016	0.312421	53.841	11.0703	0.648438	0.325126					62.8836	39.6763	0.917126	0.699945
				52.4915	24.7979	0.637931	0.284156	54.0032	9.9321	0.650391	0.291698					63.073	38.2113	0.919889	0.6741
				52.6492	19.4197	0.639847	0.222528	54.1653	9.123	0.652343	0.267935					63.2624	22.977	0.922651	0.405346
				52.8068	21.8109	0.641763	0.249928	54.3275	9.7944	0.654297	0.287653					63.4519	23.5547	0.925415	0.415537
				52.9644	23.4698	0.643678	0.268938	54.4897	14.25	0.65625	0.418511					63.6413	34.5854	0.928177	0.610134
				53.122	23.1379	0.645593	0.265134	54.6518	12.6738	0.658202	0.372219					63.8307	37.1335	0.930939	0.655086
				53.2797	21.7442	0.64751	0.249164	54.814	12.1289	0.660156	0.356216					64.0201	24.3458	0.933702	0.429494
				53.4373	20.0256	0.649425	0.229471	54.9762	10.9565	0.662109	0.321783					64.2095	28.354	0.936464	0.500204
				53.5949	21.4317	0.65134	0.245583	55.1384	10.9688	0.664063	0.322145					64.3989	27.8983	0.939226	0.492165
				53.7526	14.5964	0.653257	0.167258	55.3005	9.5791	0.666015	0.28133					64.5883	26.4224	0.941989	0.466128
				53.9102	15.1451	0.655172	0.173546	55.4627	7.7695	0.667969	0.228184					64.7777	29.8986	0.944751	0.527453
				54.0678	13.807	0.657088	0.158213	55.6249	7.6016	0.669922	0.223253					64.9671	29.2855	0.947513	0.516637
				54.2255	15.4799	0.659004	0.177382	55.787	6.5938	0.671874	0.193654					65.1565	31.4631	0.950276	0.555053
				54.3831	14.9727	0.660919	0.17157	55.9492	8.7822	0.673828	0.257926					65.3459	39.2623	0.953038	0.692641
				54.5407	12.2319	0.662835	0.140164	56.1114	9.3652	0.675781	0.275048					65.5353	33.2866	0.9558	0.587222
				54.6984	12.2153	0.664751	0.139974	56.2736	9.1616	0.677735	0.269069					65.7248	24.7063	0.958564	0.435853
				54.856	14.6667	0.666667	0.168064	56.4357	9.2891	0.679687	0.272813					65.9142	29.011	0.961326	0.511794
				55.0136	19.1476	0.668582	0.21941	56.5979	15.3911	0.68164	0.452024					66.1036	24.2992	0.964089	0.428671
				55.1713	16.8735	0.670499	0.193351	56.7601	13.9668	0.683594	0.410193					66.293	21.3978	0.966851	0.377487
				55.3289	17.3187	0.672414	0.198453	56.9222	14.0605	0.685546	0.412945					66.4824	28.7706	0.969613	0.507553
				55.4865	19.8279	0.674329	0.227205	57.0844	10	0.6875	0.293692					66.6718	29.8846	0.972375	0.527206
				55.6442	18.3413	0.676246	0.210171	57.2466	11.4917	0.689453	0.337502					66.8612	38.7305	0.975138	0.68326
				55.8018	16.6087	0.678161	0.190317	57.4088	11.627	0.691407	0.341475					67.0506	38.5199	0.9779	0.679544
				55.9594	19.5169	0.680076	0.223642	57.5709	9.0713	0.693359	0.266417					67.24	44.3081	0.980662	0.781656
				56.1171	19.6906	0.681993	0.225632	57.7331	9.5859	0.695312	0.28153					67.4294	56.6849	0.983425	1
				56.2747	15.9316	0.683908	0.182558	57.8953	9.2153	0.697266	0.270646					67.6188	47.3701	0.986187	0.835674
				56.4323	14.0968	0.685823	0.161533	58.0574	9.3125	0.699218	0.2735					67.8083	45.6067	0.988951	0.804565
				56.59	16.9361	0.68774	0.194069	58.2196	11.5312	0.701171	0.338662					67.9977	43.0972	0.991713	0.760294
				56.7476	21.2735	0.689655	0.24377	58.3818	9.5312	0.703125	0.279924					68.1871	43.4342	0.994475	0.766239
				56.9052	18.6207	0.691571	0.213372	58.544	10.3115	0.705078	0.30284					68.3765	28.9739	0.997238	0.51114
				57.0629	19.7397	0.693487	0.226195	58.7061	11.9297	0.707031	0.350365					68.5659	23	1	0.405752
				57.2205	19.357	0.695403	0.221809	58.8683	8.689	0.708984	0.255189
				57.3781	18.9719	0.697318	0.217397	59.0305	9.1484	0.710938	0.268681
				57.5357	19.1587	0.699233	0.219537	59.1926	8.2456	0.71289	0.242167
				57.6934	19.8893	0.70115	0.227909	59.3548	9.0195	0.714843	0.264895
				57.851	23.9321	0.703065	0.274235	59.517	12.0044	0.716797	0.352559
				58.0086	23.5733	0.70498	0.270124	59.6792	9.75	0.71875	0.286349
				58.1663	18.4756	0.706897	0.21171	59.8413	10.8984	0.720703	0.320077
				58.3239	20.9188	0.708812	0.239706	60.0035	10.9746	0.722656	0.322315
				58.4815	19.9095	0.710727	0.22814	60.1657	10.6699	0.724609	0.313366
				58.6392	16.997	0.712644	0.194767	60.3279	9.5625	0.726563	0.280843
				58.7968	16.1445	0.714559	0.184998	60.49	10.6865	0.728515	0.313854
				58.9544	13.0855	0.716475	0.149945	60.6522	9.4922	0.730469	0.278778
				59.1121	13.2781	0.718391	0.152152	60.8144	10.1841	0.732422	0.299099
				59.2697	12.3809	0.720306	0.141871	60.9765	10.625	0.734374	0.312048
				59.4273	12	0.722222	0.137507	61.1387	9.4766	0.736328	0.27832
				59.585	10.6492	0.724138	0.122028	61.3009	11.1445	0.738281	0.327305
				59.7426	10.4482	0.726054	0.119725	61.4631	11.7109	0.740235	0.34394
				59.9002	13.9191	0.727969	0.159497	61.6252	12.8594	0.742187	0.37767
				60.0579	11.8744	0.729886	0.136067	61.7874	10.1475	0.744141	0.298024
				60.2155	9.6423	0.731801	0.11049	61.9496	8.3301	0.746094	0.244648
				60.3731	7.6212	0.733716	0.0873304	62.1117	8.814	0.748046	0.25886
				60.5308	10.5741	0.735633	0.121167	62.2739	11	0.75	0.323061
				60.6884	10.1124	0.737548	0.115877	62.4361	12.0381	0.751953	0.353549
				60.846	8.4032	0.739463	0.0962912	62.5983	12.3281	0.753907	0.362066
				61.0037	10.7396	0.74138	0.123064	62.7604	11.7397	0.755859	0.344785
				61.1613	11.1248	0.743295	0.127478	62.9226	11.9922	0.757812	0.352201
				61.3189	9.3013	0.74521	0.106582	63.0848	12.3447	0.759766	0.362554
				61.4766	10.7322	0.747127	0.122979	63.2469	11.5156	0.761718	0.338204
				61.6342	12.5955	0.749042	0.14433	63.4091	10.5205	0.763672	0.308978
				61.7918	16.0022	0.750958	0.183367	63.5713	14.1562	0.765625	0.415756
				61.9494	21.0815	0.752873	0.24157	63.7335	13.6392	0.767578	0.400572
				62.1071	27.1273	0.75479	0.310848	63.8956	11.6738	0.769531	0.34285
				62.2647	26.1333	0.756705	0.299458	64.0578	11.3057	0.771484	0.332039
				62.4223	30.2021	0.75862	0.346082	64.22	10.2891	0.773438	0.302182
				62.58	20.1677	0.760537	0.231099	64.3821	11.0679	0.77539	0.325055
				62.7376	17.3235	0.762452	0.198508	64.5443	11.207	0.777343	0.32914
				62.8952	20.5825	0.764367	0.235852	64.7065	11.0063	0.779297	0.323246
				63.0529	22.7218	0.766284	0.260366	64.8687	15.375	0.78125	0.451551
				63.2105	24.2651	0.768199	0.278051	65.0308	12.3242	0.783203	0.361952
				63.3681	22.1646	0.770114	0.253981	65.193	11.9023	0.785156	0.349561
				63.5258	19.7401	0.772031	0.226199	65.3552	12.0381	0.78711	0.353549
				63.6834	21.5709	0.773946	0.247178	65.5173	11.9531	0.789062	0.351053
				63.841	24.5422	0.775862	0.281226	65.6795	11.7041	0.791015	0.34374
				63.9987	24.6667	0.777778	0.282653	65.8417	11.7969	0.792969	0.346465
				64.1563	23.2889	0.779694	0.266865	66.0039	9.0864	0.794922	0.26686
				64.3139	23.1209	0.781609	0.26494	66.166	11.1562	0.796874	0.327648
				64.4716	19.4349	0.783525	0.222702	66.3282	12.0952	0.798828	0.355226
				64.6292	20.7317	0.785441	0.237562	66.4904	10.5371	0.800781	0.309466
				64.7868	23.5519	0.787356	0.269878	66.6525	13.1309	0.802734	0.385644
				64.9445	29.5518	0.789273	0.33863	66.8147	14.1172	0.804687	0.414611
				65.1021	27.56	0.791188	0.315807	66.9769	13.6226	0.806641	0.400085
				65.2597	33.9061	0.793103	0.388526	67.1391	13.1484	0.808594	0.386158
				65.4174	28.9315	0.79502	0.331522	67.3012	11.2778	0.810546	0.33122
				65.575	25.1989	0.796935	0.288751	67.4634	12.5	0.8125	0.367115
				65.7326	22.8403	0.79885	0.261724	67.6256	16.7192	0.814453	0.491029
				65.8903	25.7122	0.800767	0.294633	67.7878	13.248	0.816407	0.389083
				66.0479	28.208	0.802682	0.323232	67.9499	12.8428	0.818359	0.377182
				66.2055	25.2699	0.804597	0.289565	68.1121	10.9844	0.820312	0.322603
				66.3632	26.2	0.806514	0.300223	68.2743	12.9194	0.822266	0.379432
				66.5208	26.797	0.808429	0.307063	68.4364	14.4414	0.824218	0.424132
				66.6784	28.4269	0.810345	0.32574	68.5986	14.4478	0.826172	0.42432
				66.836	23.4206	0.81226	0.268374	68.7608	13.3125	0.828125	0.390977
				66.9937	22.4463	0.814177	0.257209	68.923	11.8867	0.830079	0.349103
				67.1513	20.0794	0.816092	0.230087	69.0851	12.6992	0.832031	0.372965
				67.3089	27.2213	0.818007	0.311925	69.2473	11.2246	0.833984	0.329657
				67.4666	21.9248	0.819924	0.251234	69.4095	14.125	0.835938	0.41484
				67.6242	19.7112	0.821839	0.225868	69.5716	13.3608	0.83789	0.392396
				67.7818	24.6629	0.823754	0.282609	69.7338	12.75	0.839843	0.374457
				67.9395	26.1221	0.825671	0.29933	69.896	13.1416	0.841797	0.385958
				68.0971	24.0369	0.827586	0.275436	70.0582	15	0.84375	0.440538
				68.2547	23.8859	0.829501	0.273706	70.2203	16.8906	0.845703	0.496063
				68.4124	25.5027	0.831418	0.292232	70.3825	15.6855	0.847656	0.46067
				68.57	25.6667	0.833333	0.294112	70.5447	12.4961	0.84961	0.367
				68.7276	23.2996	0.835249	0.266987	70.7068	14.2188	0.851562	0.417594
				68.8853	28.4876	0.837165	0.326436	70.869	14.9224	0.853515	0.438259
				69.0429	26.6737	0.839081	0.305651	71.0312	13.1895	0.855469	0.387365
				69.2005	22.7854	0.840996	0.261095	71.1934	12.731	0.857422	0.373899
				69.3582	24.908	0.842912	0.285418	71.3555	12.5	0.859375	0.367115
				69.5158	26.113	0.844828	0.299226	71.5177	12.96	0.861328	0.380625
				69.6734	27.4284	0.846743	0.314299	71.6799	17.7773	0.863281	0.522105
				69.8311	25.7497	0.84866	0.295063	71.842	13.8027	0.865234	0.405374
				69.9887	26.1291	0.850575	0.29941	72.0042	13.0469	0.867187	0.383177
				70.1463	25.9195	0.85249	0.297008	72.1664	15.1387	0.869141	0.444611
				70.304	27.831	0.854407	0.318912	72.3286	15.5352	0.871094	0.456256
				70.4616	31.5626	0.856322	0.361672	72.4907	15.041	0.873046	0.441742
				70.6192	31.5646	0.858237	0.361695	72.6529	13.5	0.875	0.396484
				70.7768	29.3844	0.860153	0.336712	72.8151	15.6812	0.876953	0.460544
				70.9345	26.6718	0.862069	0.305629	72.9772	16.0469	0.878906	0.471284
				71.0921	27.6399	0.863984	0.316722	73.1394	18.2637	0.880859	0.53639
				71.2497	29.6765	0.8659	0.340059	73.3016	17.1406	0.882813	0.503405
				71.4074	30.9915	0.867816	0.355128	73.4638	15.8921	0.884766	0.466738
				71.565	35.8901	0.869732	0.41126	73.6259	17.1094	0.886718	0.502489
				71.7226	29.0042	0.871647	0.332356	73.7881	14.6997	0.888672	0.431718
				71.8803	31.7632	0.873564	0.363971	73.9503	17.3125	0.890625	0.508454
				72.0379	27.1686	0.875479	0.311322	74.1124	16.3496	0.892577	0.480174
				72.1955	29.4671	0.877394	0.33766	74.2746	14.7578	0.894531	0.433424
				72.3532	31.2604	0.879311	0.358209	74.4368	17.105	0.896484	0.50236
				72.5108	32.7803	0.881226	0.375625	74.599	17.3359	0.898438	0.509141
				72.6684	33.4327	0.883141	0.383101	74.7611	15.9155	0.90039	0.467425
				72.8261	31.1967	0.885058	0.357479	74.9233	18.416	0.902344	0.540863
				72.9837	29.859	0.886973	0.342151	75.0855	17.3276	0.904297	0.508897
				73.1413	27.7531	0.888888	0.318019	75.2476	16.75	0.906249	0.491934
				73.299	27.1474	0.890805	0.311079	75.4098	17.8159	0.908203	0.523238
				73.4566	24.1749	0.89272	0.277017	75.572	17.4023	0.910156	0.511091
				73.6142	22.3745	0.894636	0.256387	75.7342	15.6719	0.91211	0.460271
				73.7719	30.7503	0.896552	0.352364	75.8963	17.7031	0.914062	0.519926
				73.9295	27.4488	0.898468	0.314532	76.0585	16.4595	0.916015	0.483402
				74.0871	26.3167	0.900383	0.30156	76.2207	16.0332	0.917969	0.470882
				74.2448	24.9267	0.902299	0.285632	76.3828	17.29	0.919921	0.507793
				74.4024	27.363	0.904215	0.313549	76.545	17.875	0.921875	0.524974
				74.56	37.3663	0.90613	0.428176	76.7072	18.9517	0.923828	0.556596
				74.7177	41.6557	0.908047	0.477327	76.8694	19.6621	0.925782	0.57746
				74.8753	37.0693	0.909962	0.424772	77.0315	19.4736	0.927734	0.571924
				75.0329	29.1829	0.911877	0.334403	77.1937	21.0312	0.929687	0.617669
				75.1906	27.3971	0.913794	0.31394	77.3559	18.3428	0.931641	0.538713
				75.3482	26.3071	0.915709	0.30145	77.518	20.6758	0.933593	0.607231
				75.5058	32.5278	0.917624	0.372732	77.6802	21.0098	0.935546	0.617041
				75.6635	32.7339	0.919541	0.375094	77.8424	27.25	0.9375	0.80031
				75.8211	30.8713	0.921456	0.35375	78.0046	25.5527	0.939453	0.750462
				75.9787	29.3991	0.923371	0.336881	78.1667	23.8887	0.941406	0.701592
				76.1363	28.5295	0.925287	0.326916	78.3289	21.2109	0.943359	0.622947
				76.294	33.6503	0.927203	0.385595	78.4911	22.6406	0.945313	0.664936
				76.4516	36.719	0.929119	0.420758	78.6532	21.2212	0.947265	0.623249
				76.6092	32.2259	0.931034	0.369273	78.8154	20.1387	0.949218	0.591457
				76.7669	26.9697	0.932951	0.309042	78.9776	22.394	0.951172	0.657693
				76.9245	27.9618	0.934866	0.320411	79.1398	21.7188	0.953125	0.637863
				77.0821	27.2718	0.936781	0.312504	79.3019	23.4341	0.955078	0.68824
				77.2398	26.02	0.938698	0.29816	79.4641	20.9883	0.957031	0.616409
				77.3974	28.9602	0.940613	0.331851	79.6263	21.9775	0.958984	0.645461
				77.555	34.4924	0.942528	0.395244	79.7885	24.9219	0.960938	0.731936
				77.7127	36.0864	0.944445	0.41351	79.9506	26.7056	0.96289	0.784322
				77.8703	38.3814	0.94636	0.439808	80.1128	24.9746	0.964844	0.733484
				78.0279	40.3603	0.948275	0.462484	80.275	24.0171	0.966797	0.705363
				78.1856	36.1426	0.950192	0.414154	80.4371	23.375	0.968749	0.686505
				78.3432	35.1865	0.952107	0.403198	80.5993	27.4248	0.970703	0.805444
				78.5008	31.0517	0.954023	0.355818	80.7615	26.4004	0.972656	0.775358
				78.6585	33.8291	0.955939	0.387643	80.9237	27.7529	0.97461	0.81508
				78.8161	39.5364	0.957855	0.453043	81.0858	28.1719	0.976562	0.827386
				78.9737	39.8622	0.95977	0.456776	81.248	27.6177	0.978515	0.811109
				79.1314	39.9779	0.961686	0.458102	81.4102	28.8105	0.980469	0.846141
				79.289	48.0484	0.963602	0.550581	81.5723	31.8408	0.982421	0.935138
				79.4466	49.7598	0.965517	0.570191	81.7345	31.5938	0.984375	0.927884
				79.6043	48.3841	0.967434	0.554427	81.8967	34.0493	0.986328	1
				79.7619	52.4447	0.969349	0.600957	82.0589	28.5254	0.988282	0.837768
				79.9195	61.418	0.971264	0.703781	82.221	28.7461	0.990234	0.844249
				80.0771	66.3821	0.973179	0.760664	82.3832	26.9297	0.992187	0.790903
				80.2348	84.8645	0.975096	0.972452	82.5454	29.6987	0.994141	0.872226
				80.3924	67.2775	0.977011	0.770924	82.7075	25.9082	0.996093	0.760903
				80.55	65.6949	0.978927	0.75279	82.8697	18.0786	0.998047	0.530954
				80.7077	78.1246	0.980843	0.89522	83.0319	13	1	0.381799
				80.8653	82.7527	0.982758	0.948253
				81.0229	83.0146	0.984674	0.951254
				81.1806	86.9973	0.98659	0.996891
				81.3382	86.727	0.988506	0.993794
				81.4958	87.2686	0.990421	1
				81.6535	86.6507	0.992338	0.99292
				81.8111	83.9234	0.994253	0.961668
				81.9687	84.1361	0.996168	0.964105
				82.1264	64.3978	0.998085	0.737926
				82.284	54	1	0.618779

## Sheet: 8-cells
1								2								3								4								5								6
X	Y			X	Y			X	Y			X	Y			X	Y			X	Y			X	Y			X	Y			X	Y			X	Y			X	Y			X	Y
0	22	0	0.284356	0	21	0	0.22541	0	20	0	0.327241	0	33	0	0.414204	0	32	0	0.293008	0	13	0	0.178519	0	12	0	0.23166	0	28	0	0.572802	0	45	0	0.528257	0	52	0	0.641975	0	19	0	0.378182	0	16	0	0.269159
0.1531	42.2577	0.00343659	0.546192	0.1531	39.6231	0.00373153	0.425307	0.1576	18.6231	0.0050241	0.304712	0.1576	32.012	0.00259687	0.401803	0.1576	43.407	0.00324609	0.397456	0.1576	22.2298	0.00263798	0.305265	0.2166	9.5526	0.00350804	0.184413	0.2166	29.8296	0.00364887	0.610231	0.2303	53.7037	0.00549537	0.63043	0.2303	48.8883	0.00357199	0.603559	0.1894	18.9181	0.00380211	0.376552	0.1894	12.8369	0.00277765	0.215948
0.3062	47.4216	0.00687318	0.612936	0.3062	46.4827	0.00746305	0.498936	0.3153	24.9819	0.0100514	0.408755	0.3153	29.6974	0.00519539	0.372751	0.3153	55.832	0.00649424	0.511226	0.3153	35.9288	0.00527764	0.493384	0.4333	7.0057	0.0070177	0.135245	0.4333	25.9709	0.00729943	0.531292	0.4605	51.5246	0.0109884	0.60485	0.4605	51.451	0.00714243	0.635198	0.3788	19.678	0.00760423	0.391677	0.3788	15.6904	0.0055553	0.263951
0.4593	53.1861	0.0103098	0.687444	0.4593	49.3709	0.0111946	0.529938	0.4729	27.7045	0.0150755	0.453303	0.4729	31.9645	0.00779226	0.401207	0.4729	59.709	0.00974033	0.546726	0.4729	34.2671	0.00791562	0.470565	0.6499	6.2864	0.0105257	0.121359	0.6499	15.393	0.0109483	0.314898	0.6908	52.549	0.0164837	0.616875	0.6908	45.3069	0.0107144	0.559344	0.5682	15.8811	0.0114063	0.316102	0.5682	14.8267	0.00833295	0.249421
0.6124	47.5258	0.0137464	0.614283	0.6124	54.8848	0.0149261	0.589123	0.6305	28.8392	0.0200996	0.471869	0.6305	39.9403	0.0103891	0.501317	0.6305	63.877	0.0129864	0.58489	0.6305	33.3483	0.0105536	0.457948	0.8666	6.0609	0.0140354	0.117006	0.8666	27.8049	0.0145989	0.568811	0.9211	52.3791	0.0219791	0.614881	0.9211	44.4122	0.0142864	0.548299	0.7576	19.1222	0.0152085	0.380614	0.7576	17.8504	0.0111106	0.300287
0.7655	45.1988	0.0171829	0.584206	0.7655	47.2325	0.0186576	0.506984	0.7882	21.3655	0.0251269	0.349584	0.7882	42.5498	0.0129877	0.53407	0.7882	61.279	0.0162346	0.561101	0.7882	36.0753	0.0131933	0.495396	1.0832	14.2475	0.0175434	0.275048	1.0832	24.7483	0.0182477	0.506281	1.1513	47.072	0.0274721	0.55258	1.1513	48.2653	0.0178568	0.595868	0.947	15.2384	0.0190106	0.30331	0.947	21.9954	0.0138883	0.370016
0.9186	49.9968	0.0206195	0.646221	0.9186	45.7768	0.0223892	0.491359	0.9458	28.7071	0.030151	0.469707	0.9458	40.7458	0.0155845	0.511427	0.9458	59.435	0.0194807	0.544217	0.9458	23.2662	0.0158312	0.319498	1.2999	22.8111	0.0210531	0.440369	1.2999	29.0669	0.0218983	0.594628	1.3816	48.5141	0.0329675	0.569509	1.3816	51.4663	0.0214288	0.635386	1.1365	14.6798	0.0228147	0.292191	1.1365	24.7333	0.0166674	0.416075
1.0716	46.6079	0.0240539	0.602419	1.0716	42.8869	0.0261182	0.46034	1.1034	24.9382	0.0351751	0.40804	1.1034	35.7706	0.0181814	0.44898	1.1034	51.289	0.0227268	0.469628	1.1034	29.8401	0.0184692	0.409772	1.5165	21.8793	0.0245611	0.42238	1.5165	25.2468	0.0255472	0.516479	1.6118	50.1479	0.0384604	0.588688	1.6118	48.05	0.0249993	0.59321	1.3259	15.4988	0.0266168	0.308493	1.3259	19.6602	0.019445	0.330733
1.2247	41.6036	0.0274905	0.537737	1.2247	45.7313	0.0298498	0.490871	1.2611	25.0676	0.0402024	0.410158	1.2611	38.7191	0.0207799	0.485989	1.2611	47.732	0.0259749	0.437058	1.2611	33.9494	0.0211089	0.466202	1.7332	15.1649	0.0280708	0.292759	1.7332	22.0604	0.0291977	0.451294	1.8421	48.5236	0.0439558	0.569621	1.8421	41.0531	0.0285713	0.506828	1.5153	15.8033	0.0304189	0.314554	1.5153	15.4548	0.0222227	0.259987
1.3778	39.9505	0.030927	0.51637	1.3778	43.1089	0.0335813	0.462723	1.4187	23.1657	0.0452265	0.379039	1.4187	52.8454	0.0233768	0.663297	1.4187	37.419	0.029221	0.342627	1.4187	45.0571	0.0237469	0.618736	1.9498	15.2377	0.0315788	0.294164	1.9498	25.0554	0.0328466	0.512564	2.0724	51.4163	0.0494512	0.603578	2.0724	44.9015	0.0321432	0.55434	1.7047	18.2882	0.034221	0.364014	1.7047	22.605	0.0250003	0.380271
1.5309	41.7461	0.0343636	0.539579	1.5309	40.2479	0.0373128	0.432013	1.5763	24.8443	0.0502506	0.406504	1.5763	50.8887	0.0259737	0.638737	1.5763	40.181	0.0324671	0.367917	1.5763	40.6106	0.0263849	0.557676	2.1665	16.7085	0.0350885	0.322558	2.1665	16.3391	0.0364971	0.334253	2.3026	46.6287	0.0549442	0.547376	2.3026	46.2092	0.0357137	0.570484	1.8941	19.603	0.0380231	0.390184	1.8941	24.4444	0.027778	0.411215
1.684	35.6514	0.0378002	0.460804	1.684	41.9284	0.0410443	0.450051	1.734	25.814	0.0552779	0.42237	1.734	42.6547	0.0285722	0.535387	1.734	46.306	0.0357152	0.424001	1.734	38.8251	0.0290245	0.533157	2.3831	17.2621	0.0385965	0.333245	2.3831	9.9869	0.040146	0.204304	2.5329	42.8236	0.0604395	0.502708	2.5329	55.0952	0.0392857	0.680188	2.0835	19.0358	0.0418253	0.378894	2.0835	22.5813	0.0305556	0.379873
1.8371	34.1043	0.0412368	0.440807	1.8371	43.1724	0.0447759	0.463404	1.8916	23.5925	0.060302	0.386022	1.8916	42.561	0.0311691	0.534211	1.8916	44.005	0.0389613	0.402932	1.8916	37.1668	0.0316625	0.510384	2.5997	12.4687	0.0421046	0.240708	2.5997	9.8467	0.0437949	0.201436	2.7632	50.2802	0.0659349	0.590242	2.7632	57.2449	0.0428577	0.706727	2.2729	17.8667	0.0456274	0.355624	2.2729	16.96	0.0333333	0.285309
1.9902	41.7007	0.0446734	0.538992	1.9902	40.8072	0.0485074	0.438017	2.0492	22.7677	0.0653261	0.372526	2.0492	41.0244	0.0337659	0.514924	2.0492	40.565	0.0422074	0.371434	2.0492	26.2969	0.0343005	0.361116	2.8164	9.7317	0.0456142	0.187871	2.8164	12.1067	0.0474455	0.247669	2.9934	51.3061	0.0714279	0.602285	2.9934	45.473	0.0464281	0.561395	2.4623	18.0891	0.0494295	0.360051	2.4623	21.1317	0.0361109	0.355487
2.1433	36.8114	0.04811	0.475797	2.1433	47.0728	0.0522389	0.50527	2.2069	21.54	0.0703533	0.352439	2.2069	44.7921	0.0363644	0.562215	2.2069	43.661	0.0454556	0.399782	2.2069	30.4018	0.0369401	0.417486	3.033	7.8604	0.0491223	0.151745	3.033	15.0194	0.0510943	0.307255	3.2237	53.3077	0.0769233	0.625782	3.2237	47.95	0.0500001	0.591975	2.6517	20.8964	0.0532316	0.415928	2.6517	20.1044	0.0388886	0.338205
2.2964	37.7364	0.0515466	0.487753	2.2964	45.7029	0.0559704	0.490566	2.3645	24.6198	0.0753774	0.402831	2.3645	47.4697	0.0389613	0.595823	2.3645	46.68	0.0487017	0.427426	2.3645	30.9895	0.0395781	0.425556	3.2497	7.9197	0.0526319	0.15289	3.2497	17.4368	0.0547449	0.356708	3.454	52.8486	0.0824186	0.620392	3.454	52.3444	0.0535721	0.646227	2.8411	21.9362	0.0570337	0.436625	2.8411	16.5417	0.0416662	0.278272
2.4495	37.4392	0.0549832	0.483911	2.4495	41.8184	0.059702	0.448871	2.5221	24.2056	0.0804015	0.396053	2.5221	46.6268	0.0415582	0.585243	2.5221	39.724	0.0519478	0.363733	2.5221	25.8778	0.0422161	0.355361	3.4663	2.9426	0.05614	0.0568069	3.4663	15.7692	0.0583938	0.322594	3.6842	55.0168	0.0879116	0.645845	3.6842	44.1918	0.0571425	0.545578	3.0305	27.034	0.0608358	0.538093	3.0305	16.2193	0.0444439	0.272848
2.6026	35.8867	0.0584198	0.463845	2.6026	41.2756	0.0634335	0.443044	2.6797	25.0055	0.0854256	0.409141	2.6797	47.6163	0.0441551	0.597663	2.6797	42.56	0.0551938	0.389701	2.6797	28.8775	0.0448541	0.396553	3.683	1.073	0.0596496	0.0207143	3.683	13.7849	0.0620443	0.282001	3.9145	49.4534	0.093407	0.580536	3.9145	61.636	0.0607145	0.760938	3.2199	15.3323	0.0646379	0.305179	3.2199	15.0998	0.0472215	0.254016
2.7557	33.2482	0.0618563	0.429742	2.7557	47.6462	0.067165	0.511425	2.8374	29.0728	0.0904529	0.475691	2.8374	46.1144	0.0467536	0.578812	2.8374	37.039	0.058442	0.339148	2.8374	24.494	0.0474937	0.336358	3.8996	1.4825	0.0631577	0.0286197	3.8996	12.4918	0.0656932	0.255547	4.1447	49.4822	0.0989	0.580874	4.1447	66.85	0.0642849	0.825309	3.4094	22.0447	0.0684421	0.438784	3.4094	20.92	0.0500007	0.351925
2.9088	34.0068	0.0652929	0.439547	2.9088	35.1564	0.0708965	0.377362	2.995	24.4968	0.095477	0.400818	2.995	48.2167	0.0493505	0.605199	2.995	38.049	0.0616881	0.348396	2.995	20.8973	0.0501317	0.286967	4.1163	1.6444	0.0666673	0.0317452	4.1163	13.2455	0.0693437	0.270966	4.375	50.1546	0.104395	0.588767	4.375	49.1661	0.0678569	0.606989	3.5988	23.0796	0.0722442	0.459383	3.5988	20.6617	0.0527783	0.34758
3.0619	35.0402	0.0687295	0.452904	3.0619	33.4656	0.0746281	0.359213	3.1526	21.8136	0.100501	0.356915	3.1526	50.8204	0.0519473	0.63788	3.1526	36.555	0.0649342	0.334716	3.1526	30.2936	0.0527697	0.416	4.3329	0.7042	0.0701754	0.0135946	4.3329	15.3151	0.0729926	0.313304	4.6053	53.1053	0.109891	0.623406	4.6053	50.1633	0.0714289	0.6193	3.7882	23.416	0.0760463	0.466079	3.7882	21.3704	0.055556	0.359502
3.2149	33.5971	0.0721639	0.434251	3.2149	45.3015	0.0783572	0.486258	3.3103	24.5403	0.105528	0.40153	3.3103	51.3441	0.0545458	0.644453	3.3103	31.628	0.0681823	0.289602	3.3103	30.7509	0.0554094	0.42228	4.5496	0.0211	0.073685	0.000407336	4.5496	11.7993	0.0766432	0.241381	4.8355	46.0473	0.115384	0.540551	4.8355	56.425	0.0749993	0.696605	3.9776	17.2724	0.0798484	0.343795	3.9776	20.9667	0.0583336	0.352711
3.368	37.0128	0.0756004	0.4784	3.368	39.0319	0.0820887	0.418961	3.4679	29.1924	0.110553	0.477648	3.4679	50.4751	0.0571427	0.633546	3.4679	34.49	0.0714284	0.315808	3.4679	26.7263	0.0580474	0.367013	4.7662	0.3496	0.0771931	0.00674903	4.7662	9.2628	0.080292	0.189491	5.0658	47.0949	0.120879	0.552849	5.0658	61.0245	0.0785713	0.753389	4.167	15.7598	0.0836505	0.313688	4.167	22.8052	0.0611113	0.383639
3.5211	34.2056	0.079037	0.442116	3.5211	34.9244	0.0858202	0.374872	3.6255	27.4365	0.115577	0.448918	3.6255	53.6531	0.0597396	0.673435	3.6255	36.402	0.0746745	0.333315	3.6255	29.9438	0.0606853	0.411196	4.9828	0.1884	0.0807011	0.00363707	4.9828	6.8144	0.0839409	0.139404	5.2961	54.1721	0.126374	0.635929	5.2961	50.3541	0.0821433	0.621656	4.3564	13.4483	0.0874526	0.267679	4.3564	20.4154	0.0638889	0.343437
3.6742	32.8196	0.0824736	0.424202	3.6742	33.7619	0.0895517	0.362394	3.7832	29.2063	0.120604	0.477875	3.7832	53.6704	0.0623381	0.673652	3.7832	34.04	0.0779227	0.311687	3.7832	29.7337	0.063325	0.408311	5.1995	1.805	0.0842107	0.0348456	5.1995	9.8627	0.0875915	0.201763	5.5263	54.6374	0.131867	0.641391	5.5263	51.1714	0.0857138	0.631746	4.5458	12.2805	0.0912547	0.244435	4.5458	17.84	0.0666666	0.300112
3.8273	33.5025	0.0859102	0.433028	3.8273	36.7411	0.0932833	0.394372	3.9408	30.1714	0.125628	0.493666	3.9408	46.405	0.064935	0.582459	3.9408	30.325	0.0811688	0.277671	3.9408	29.1804	0.065963	0.400713	5.4161	0.2007	0.0877188	0.00387452	5.4161	8.854	0.0912403	0.181128	5.7566	51.9525	0.137363	0.609873	5.7566	52.7449	0.0892857	0.651172	4.7352	14.5164	0.0950569	0.288939	4.7352	15.1296	0.0694442	0.254517
3.9804	32.1208	0.0893468	0.41517	3.9804	35.5213	0.0970148	0.381279	4.0984	26.5073	0.130652	0.433714	4.0984	38.98	0.0675319	0.489263	4.0984	30.836	0.0844148	0.28235	4.0984	29.3164	0.068601	0.402581	5.6328	0	0.0912284	0	5.6328	3.3711	0.0948909	0.0689633	5.9869	46.9388	0.142858	0.551017	5.9869	48.1235	0.0928577	0.594117	4.9246	13.8594	0.098859	0.275862	4.9246	15.8341	0.0722219	0.266368
4.1335	31.2044	0.0927834	0.403325	4.1335	34.4941	0.100746	0.370253	4.2561	28.5763	0.135679	0.467567	4.2561	37.7719	0.0701304	0.4741	4.2561	30.326	0.087663	0.27768	4.2561	34.7511	0.0712406	0.477211	5.8494	0	0.0947365	0	5.8494	3.826	0.0985398	0.0782693	6.2171	42.8195	0.148351	0.50266	6.2171	40.2179	0.0964282	0.496517	5.114	16.7973	0.102661	0.334339	5.114	18.06	0.0749995	0.303813
4.2866	28.2307	0.09622	0.364889	4.2866	36.2176	0.104478	0.388753	4.4137	29.9965	0.140704	0.490805	4.4137	39.3792	0.0727272	0.494274	4.4137	25.364	0.0909091	0.232246	4.4137	28.9687	0.0738786	0.397806	6.0661	0	0.0982461	0	6.0661	6.0784	0.10219	0.124347	6.4474	43.5385	0.153847	0.5111	6.4474	44.8	0.1	0.553086	5.3034	19.9757	0.106463	0.397602	5.3034	17.1926	0.0777772	0.289222
4.4397	31.771	0.0996566	0.410648	4.4397	34.8571	0.108209	0.374149	4.5713	30.3065	0.145728	0.495877	4.5713	39.9795	0.0753241	0.501809	4.5713	22.332	0.0941552	0.204483	4.5713	17.4168	0.0765166	0.239172	6.2827	0.0708	0.101754	0.0013668	6.2827	4.4304	0.105839	0.0906337	6.6777	38.1461	0.159342	0.447799	6.6777	44.6069	0.103572	0.550702	5.4928	18.8147	0.110265	0.374493	5.4928	19.8117	0.0805548	0.333281
4.5928	36.5995	0.103093	0.473058	4.5928	32.5402	0.111941	0.34928	4.729	29.6192	0.150755	0.484631	4.729	35.0627	0.0779226	0.440095	4.729	23.807	0.0974033	0.217989	4.729	18.1872	0.0791562	0.249751	6.4994	0.4321	0.105264	0.0083417	6.4994	6.82	0.10949	0.139518	6.9079	35.4975	0.164835	0.416707	6.9079	53.7245	0.107143	0.663265	5.6823	21.4178	0.114069	0.426306	5.6823	18.5	0.0833339	0.311215
4.7459	32.6281	0.10653	0.421727	4.7459	32.12	0.115672	0.34477	4.8866	29.1121	0.155779	0.476334	4.8866	30.423	0.0805195	0.381859	4.8866	22.379	0.100649	0.204913	4.8866	12.4279	0.0817942	0.170663	6.716	0.3341	0.108772	0.00644981	6.716	5.8065	0.113139	0.118785	7.1382	40.7066	0.17033	0.477857	7.1382	43.0181	0.110715	0.531088	5.8717	20.6079	0.117872	0.410186	5.8717	20.0128	0.0861116	0.336664
4.899	35.0234	0.109966	0.452686	4.899	32.7137	0.119404	0.351143	5.0442	20.0761	0.160803	0.328486	5.0442	31.9676	0.0831164	0.401246	5.0442	22.132	0.103896	0.202652	5.0442	14.1729	0.0844322	0.194626	6.9327	0	0.112282	0	6.9327	5.8524	0.116789	0.119724	7.3684	39.3927	0.175823	0.462433	7.3684	38.9551	0.114285	0.480927	6.0611	21.6084	0.121674	0.4301	6.0611	18.12	0.0888892	0.304823
5.0521	28.5631	0.113403	0.369185	5.0521	30.0947	0.123135	0.323031	5.2019	22.7931	0.16583	0.372942	5.2019	33.2653	0.0857149	0.417534	5.2019	21.653	0.107144	0.198266	5.2019	15.7943	0.0870719	0.216892	7.1493	0	0.11579	0	7.1493	4.4055	0.120438	0.0901243	7.5987	40.1099	0.181319	0.470852	7.5987	45.0071	0.117857	0.555643	6.2505	17.8906	0.125476	0.3561	6.2505	16.3833	0.0916669	0.275607
5.2052	23.1063	0.11684	0.298655	5.2052	31.2776	0.126867	0.335728	5.3595	26.1067	0.170854	0.427159	5.3595	34.723	0.0883118	0.435831	5.3595	18.606	0.11039	0.170366	5.3595	10.6017	0.0897099	0.145585	7.3659	0.6394	0.119298	0.0123436	7.3659	8.4302	0.124087	0.172458	7.829	42.0383	0.186814	0.49349	7.829	56.1469	0.121429	0.693172	6.4399	16.8489	0.129278	0.335366	6.4399	13.4007	0.0944446	0.225433
5.3582	23.6322	0.120274	0.305452	5.3582	31.4099	0.130596	0.337148	5.5171	25.775	0.175879	0.421732	5.5171	36.2645	0.0909086	0.455179	5.5171	21.339	0.113636	0.195391	5.5171	8.0626	0.0923478	0.110718	7.5826	0.2982	0.122807	0.00575676	7.5826	9.695	0.127737	0.198333	8.0592	42.1834	0.192307	0.495193	8.0592	57.375	0.124999	0.708333	6.6293	14.358	0.13308	0.285786	6.6293	14.3796	0.0972222	0.2419
5.5113	27.1313	0.12371	0.350679	5.5113	31.1114	0.134328	0.333944	5.6748	25.2921	0.180906	0.413831	5.6748	38.4219	0.0935072	0.482258	5.6748	21.877	0.116884	0.200317	5.6748	15.9848	0.0949875	0.219508	7.7992	0	0.126315	0	7.7992	4.1038	0.131386	0.0839523	8.2895	41.7363	0.197802	0.489944	8.2895	56.6327	0.128571	0.699169	6.8187	16.3477	0.136882	0.32539	6.8187	14.56	0.0999999	0.244935
5.6644	23.077	0.127147	0.298276	5.6644	40.2473	0.138059	0.432007	5.8324	23.1538	0.18593	0.378844	5.8324	40.296	0.096104	0.505781	5.8324	17.96	0.12013	0.164451	5.8324	13.6657	0.0976255	0.187661	8.0159	0	0.129825	0	8.0159	2.2726	0.135037	0.0464911	8.5198	44.3956	0.203298	0.521162	8.5198	55.0546	0.132143	0.679686	7.0081	18.3016	0.140684	0.364281	7.0081	13.6859	0.102778	0.23023
5.8175	27.6408	0.130584	0.357264	5.8175	29.9891	0.141791	0.321897	5.99	25.7293	0.190954	0.420984	5.99	41.1192	0.0987009	0.516114	5.99	22.741	0.123376	0.208228	5.99	22.9598	0.100263	0.31529	8.2325	0.0444	0.133333	0.000857143	8.2325	4.0849	0.138686	0.0835657	8.75	42.0813	0.208791	0.493994	8.75	49.8898	0.135714	0.615923	7.1975	15.7003	0.144486	0.312503	7.1975	12.5252	0.105555	0.210704
5.9706	27.4596	0.13402	0.354922	5.9706	30.6546	0.145522	0.329041	6.1477	21.4466	0.195981	0.350911	6.1477	34.736	0.101299	0.435994	6.1477	24.587	0.126624	0.225131	6.1477	22.994	0.102903	0.31576	8.4492	0.482	0.136843	0.00930502	8.4492	3.6121	0.142336	0.0738935	8.9803	45.7755	0.214286	0.537361	8.9803	53.3087	0.139286	0.658132	7.3869	18.1686	0.148288	0.361633	7.3869	15.0883	0.108333	0.253822
6.1237	23.8221	0.137457	0.307907	6.1237	30.7365	0.149254	0.32992	6.3053	24.3171	0.201005	0.397878	6.3053	31.7441	0.103896	0.398441	6.3053	23.625	0.12987	0.216322	6.3053	24.9208	0.105541	0.342219	8.6658	0.2401	0.140351	0.00463514	8.6658	8.7646	0.145985	0.179299	9.2106	48.103	0.219781	0.564683	9.2106	54.3061	0.142858	0.670446	7.5763	20.0203	0.152091	0.39849	7.5763	19.4074	0.11111	0.32648
6.2768	30.8427	0.140893	0.39865	6.2768	34.8856	0.152985	0.374455	6.4629	25.9445	0.20603	0.424505	6.4629	39.3148	0.106493	0.493466	6.4629	24.289	0.133117	0.222402	6.4629	20.719	0.108179	0.284519	8.8825	0.8595	0.14386	0.0165927	8.8825	7.904	0.149636	0.161694	9.4408	48.0781	0.225274	0.564391	9.4408	45.2584	0.146428	0.558746	7.7657	14.9214	0.155893	0.297	7.7657	23.3428	0.113888	0.392683
6.4299	28.8329	0.14433	0.372673	6.4299	32.8249	0.156717	0.352336	6.6206	28.1172	0.211057	0.460055	6.6206	33.5236	0.109092	0.420776	6.6206	25.612	0.136365	0.234516	6.6206	18.2833	0.110819	0.251071	9.0991	0	0.147368	0	9.0991	1.4871	0.153285	0.0304219	9.6711	49.929	0.23077	0.586119	9.6711	44.9	0.15	0.554321	7.9552	14.2933	0.159697	0.284498	7.9552	18.56	0.116667	0.312225
6.583	33.9918	0.147767	0.439353	6.583	27.8895	0.160448	0.29936	6.7782	28.6651	0.216081	0.46902	6.7782	37.4519	0.111689	0.470083	6.7782	20.895	0.139611	0.191325	6.7782	12.846	0.113457	0.176405	9.3158	0.3458	0.150878	0.00667568	9.3158	5.7626	0.156935	0.117887	9.9013	45.5979	0.236263	0.535276	9.9013	42.4487	0.153571	0.524058	8.1446	18.0969	0.163499	0.360206	8.1446	18.2159	0.119445	0.306436
6.7361	30.1827	0.151203	0.390119	6.7361	26.8848	0.16418	0.288576	6.9358	32.6588	0.221105	0.534365	6.9358	37.3118	0.114285	0.468325	6.9358	29.878	0.142857	0.273578	6.9358	15.8636	0.116095	0.217843	9.5324	0.0014	0.154386	2.7027e-05	9.5324	3.3128	0.160584	0.0677707	10.1316	43.4426	0.241758	0.509975	10.1316	49.6449	0.157143	0.6129	8.334	20.3731	0.167301	0.405512	8.334	16.8859	0.122223	0.284062
6.8892	30.5392	0.15464	0.394727	6.8892	25.6221	0.167911	0.275023	7.0934	33.8419	0.226129	0.553723	7.0934	34.1128	0.116882	0.428172	7.0934	26.21	0.146103	0.239992	7.0934	11.0569	0.118733	0.151836	9.749	0	0.157894	0	9.749	2.8686	0.164233	0.0586836	10.3619	40.9353	0.247254	0.480541	10.3619	57.6837	0.160715	0.712144	8.5234	14.5552	0.171103	0.289711	8.5234	17.5	0.125	0.294393
7.0423	29.0137	0.158076	0.37501	7.0423	29.9419	0.171643	0.321391	7.2511	25.5691	0.231156	0.418363	7.2511	29.3614	0.119481	0.368534	7.2511	24.947	0.149351	0.228427	7.2511	9.3511	0.121372	0.128412	9.9657	0	0.161404	0	9.9657	0.4736	0.167884	0.00968854	10.5921	52.7704	0.252746	0.619474	10.5921	59.502	0.164285	0.734593	8.7128	20.2759	0.174905	0.403578	8.7128	19.7904	0.127778	0.332923
7.1954	32.4328	0.161513	0.419202	7.1954	25.143	0.175374	0.26988	7.4087	23.657	0.236181	0.387077	7.4087	27.766	0.122078	0.348509	7.4087	26.506	0.152597	0.242702	7.4087	6.417	0.12401	0.0881199	10.1823	0	0.164912	0	10.1823	2.2539	0.171532	0.0461085	10.8224	51.6035	0.258242	0.605776	10.8224	51.2421	0.167857	0.632619	8.9022	13.11	0.178707	0.260945	8.9022	16.7406	0.130555	0.281618
7.3484	23.7091	0.164947	0.306446	7.3484	22.039	0.179103	0.236562	7.5663	24.342	0.241205	0.398285	7.5663	28.8808	0.124675	0.362502	7.5663	31.292	0.155843	0.286525	7.5663	4.2667	0.126648	0.0585915	10.399	0.0953	0.168421	0.00183977	10.399	1.5384	0.175183	0.0314714	11.0527	44.4141	0.263737	0.521379	11.0527	60.1755	0.171429	0.742907	9.0916	13.1012	0.182509	0.26077	9.0916	21.3733	0.133333	0.359551
7.5015	25.302	0.168384	0.327035	7.5015	25.3701	0.182835	0.272318	7.724	26.2562	0.246232	0.429606	7.724	30.1273	0.127273	0.378147	7.724	29.413	0.159091	0.26932	7.724	8.2686	0.129288	0.113547	10.6156	0.6067	0.17193	0.0117124	10.6156	1.7907	0.178832	0.0366327	11.2829	47.9349	0.26923	0.56271	11.2829	67.1125	0.174999	0.828549	9.281	13.0416	0.186312	0.259584	9.281	20.4687	0.136111	0.344334
7.6546	27.4747	0.17182	0.355118	7.6546	25.8037	0.186567	0.276972	7.8816	26.6784	0.251256	0.436514	7.8816	30.2275	0.12987	0.379405	7.8816	28.601	0.162338	0.261885	7.8816	4.4592	0.131926	0.0612349	10.8323	0.0197	0.175439	0.000380309	10.8323	2.9981	0.182482	0.0613328	11.5132	43.8028	0.274726	0.514203	11.5132	51.0969	0.178571	0.630826	9.4704	14.6624	0.190114	0.291845	9.4704	17.6481	0.138888	0.296884
7.8077	24.0716	0.175257	0.311132	7.8077	24.6943	0.190298	0.265064	8.0392	25.5208	0.25628	0.417573	8.0392	26.4212	0.132467	0.33163	8.0392	24.526	0.165584	0.224572	8.0392	4.3658	0.134564	0.0599523	11.0489	0.6737	0.178947	0.0130058	11.0489	1.3628	0.186131	0.0278791	11.7435	33.2055	0.280221	0.389801	11.7435	48.5643	0.182143	0.599559	9.6598	13.0935	0.193916	0.260617	9.6598	18.26	0.141666	0.307178
7.9608	27.2778	0.178694	0.352573	7.9608	25.1092	0.19403	0.269517	8.1969	23.1611	0.261307	0.378963	8.1969	31.5647	0.135065	0.396189	8.1969	23.809	0.168832	0.218007	8.1969	2.3045	0.137204	0.031646	11.2656	2.2421	0.182457	0.0432838	11.2656	2.3471	0.189782	0.0480151	11.9737	30.1429	0.285714	0.353849	11.9737	45.3388	0.185714	0.559738	9.8492	13.9064	0.197718	0.276797	9.8492	19.0519	0.144444	0.320499
8.1139	27.3183	0.18213	0.353096	8.1139	26.6532	0.197761	0.28609	8.3545	26.553	0.266332	0.434462	8.3545	34.2251	0.137662	0.429581	8.3545	22.976	0.172078	0.21038	8.3545	3.2687	0.139842	0.0448867	11.4822	1.23	0.185965	0.0237452	11.4822	3.1739	0.193431	0.0649292	12.204	29.9552	0.291209	0.351645	12.204	48.0656	0.189286	0.593402	10.0387	15.9514	0.201522	0.317501	10.0387	17.2796	0.147223	0.290685
8.267	29.9752	0.185567	0.387437	8.267	32.4769	0.201493	0.348601	8.5121	28.407	0.271356	0.464797	8.5121	26.7429	0.140259	0.335668	8.5121	18.727	0.175324	0.171474	8.5121	2.6	0.14248	0.0357039	11.6989	0	0.189475	0	11.6989	2.9684	0.197081	0.0607252	12.4342	38.1973	0.296702	0.4484	12.4342	60.7286	0.192856	0.749736	10.2281	17.5038	0.205324	0.348401	10.2281	16.62	0.150001	0.279589
8.4201	27.6647	0.189003	0.357573	8.4201	26.4688	0.205224	0.284111	8.6698	31.9147	0.276383	0.52219	8.6698	27.1633	0.142858	0.340944	8.6698	22.939	0.178572	0.210041	8.6698	4.8036	0.145119	0.0659643	11.9155	0.1853	0.192983	0.00357722	11.9155	1.5433	0.20073	0.0315716	12.6645	38.7226	0.302198	0.454566	12.6645	55.2181	0.196428	0.681705	10.4175	16.9304	0.209126	0.336988	10.4175	20.2176	0.152778	0.340109
8.5732	29.6511	0.19244	0.383248	8.5732	22.8864	0.208956	0.245658	8.8274	31.9487	0.281407	0.522747	8.8274	30.406	0.145454	0.381645	8.8274	19.744	0.181818	0.180786	8.8274	6.1786	0.147757	0.0848462	12.1321	0.2663	0.196491	0.00514093	12.1321	3.2336	0.204379	0.0661505	12.8948	41.4024	0.307693	0.486025	12.8948	48.8	0.2	0.602469	10.6069	17.5363	0.212928	0.349048	10.6069	17.6148	0.155556	0.296324
8.7263	29.6333	0.195877	0.383018	8.7263	30.0997	0.212687	0.323084	8.985	27.0667	0.286431	0.442867	8.985	33.4353	0.148051	0.419668	8.985	16.545	0.185064	0.151494	8.985	3.5847	0.150395	0.049226	12.3488	2.8	0.2	0.0540541	12.3488	3.6422	0.20803	0.0745093	13.125	46.5649	0.313186	0.546627	13.125	56.0564	0.203571	0.692054	10.7963	17.2591	0.216731	0.34353	10.7963	17.5833	0.158333	0.295794
8.8794	30.1632	0.199313	0.389867	8.8794	31.0096	0.216419	0.332851	9.1427	21.4776	0.291458	0.351418	9.1427	33.1065	0.15065	0.415541	9.1427	19.466	0.188312	0.17824	9.1427	1.3347	0.153035	0.0183285	12.5654	2.3505	0.203508	0.0453764	12.5654	5.7455	0.211678	0.117537	13.3553	43.8011	0.318681	0.514183	13.3553	54.0684	0.207143	0.667511	10.9857	18.4773	0.220533	0.367778	10.9857	14.0674	0.161111	0.236648
9.0325	31.6729	0.20275	0.40938	9.0325	22.6187	0.22015	0.242785	9.3003	21.2721	0.296482	0.348055	9.3003	30.3	0.153247	0.380315	9.3003	18.976	0.191559	0.173754	9.3003	1.0497	0.155673	0.0144148	12.7821	0.6231	0.207018	0.012029	12.7821	4.0393	0.215329	0.0826328	13.5856	48.0221	0.324177	0.563734	13.5856	59.9436	0.210715	0.740044	11.1751	16.9337	0.224335	0.337053	11.1751	10.2531	0.163889	0.172482
9.1856	29.2482	0.206186	0.378041	9.1856	26.5222	0.223882	0.284684	9.4579	20.6967	0.301507	0.338641	9.4579	29.6886	0.155844	0.372641	9.4579	15.917	0.194805	0.145744	9.4579	1.8175	0.158311	0.0249584	12.9987	0.2327	0.210526	0.00449228	12.9987	3.5931	0.218978	0.0735048	13.8158	53.153	0.32967	0.623965	13.8158	57.0612	0.214285	0.704459	11.3645	23.7294	0.228137	0.472317	11.3645	13.3333	0.166666	0.224299
9.3387	28.1338	0.209623	0.363637	9.3387	21.2396	0.227613	0.227982	9.6156	22.01	0.306534	0.360129	9.6156	31.3081	0.158442	0.392968	9.6156	15.169	0.198053	0.138895	9.6156	3.7801	0.16095	0.0519093	13.2154	0	0.214036	0	13.2154	0.9197	0.222628	0.0188145	14.0461	51.4701	0.335165	0.60421	14.0461	58.8089	0.217857	0.726036	11.5539	30.0404	0.231939	0.597933	11.5539	14.5409	0.169444	0.244613
9.4917	28.6802	0.213057	0.370699	9.4917	21.6765	0.231342	0.232671	9.7732	25.782	0.311558	0.421847	9.7732	27.236	0.161039	0.341857	9.7732	13.778	0.201299	0.126158	9.7732	1.5292	0.163588	0.0209994	13.432	0	0.217544	0	13.432	0.1971	0.226277	0.00403212	14.2764	48.2122	0.34066	0.565965	14.2764	56.7102	0.221429	0.700126	11.7433	24.0563	0.235741	0.478824	11.7433	12.8563	0.172222	0.216274
9.6448	25.4715	0.216494	0.329226	9.6448	21.2903	0.235074	0.228526	9.9308	30.5007	0.316582	0.499054	9.9308	25.2889	0.163636	0.317417	9.9308	13.314	0.204545	0.12191	9.9308	1.231	0.166226	0.0169044	13.6487	0.5263	0.221053	0.0101602	13.6487	3.6904	0.229928	0.0754953	14.5066	46.7041	0.346153	0.548262	14.5066	56.0125	0.225	0.691512	11.9327	26.5928	0.239543	0.529311	11.9327	14.06	0.174999	0.236524
9.7979	28.1231	0.21993	0.363498	9.7979	22.0372	0.238805	0.236543	10.0885	30.022	0.321609	0.491222	10.0885	27.5818	0.166234	0.346197	10.0885	14.553	0.207793	0.133255	10.0885	3.2617	0.168866	0.0447905	13.8653	1.9468	0.224561	0.037583	13.8653	3.9131	0.233577	0.0800511	14.7369	52.5877	0.351649	0.617329	14.7369	52.0449	0.228572	0.64253	12.1221	25.3084	0.243345	0.503746	12.1221	13.763	0.177777	0.231527
9.951	31.1436	0.223367	0.402539	9.951	24.7137	0.242537	0.265272	10.2461	27.2399	0.326633	0.445701	10.2461	26.6106	0.168831	0.334007	10.2461	14.551	0.211039	0.133236	10.2461	2.7031	0.171504	0.0371197	14.082	2.9129	0.228071	0.0562336	14.082	4.854	0.237227	0.0992993	14.9672	50.9184	0.357144	0.597733	14.9672	40.9324	0.232144	0.505338	12.3116	17.6232	0.247149	0.350777	12.3116	12.1898	0.180556	0.205062
10.1041	30.1758	0.226804	0.39003	10.1041	21.8541	0.246268	0.234578	10.4037	25.3933	0.331658	0.415487	10.4037	26.1388	0.171428	0.328085	10.4037	16.306	0.214285	0.149306	10.4037	2.522	0.174142	0.0346328	14.2986	0.2116	0.231579	0.00408494	14.2986	3.3507	0.240876	0.068546	15.1974	45.2023	0.362637	0.530632	15.1974	46.4704	0.235714	0.573709	12.501	13.077	0.250952	0.260289	12.501	15.5467	0.183334	0.261533
10.2572	26.8392	0.23024	0.346904	10.2572	22.5	0.25	0.241511	10.5614	29.0653	0.336685	0.475568	10.5614	26.5721	0.174027	0.333524	10.5614	12.08	0.217533	0.110611	10.5614	1.8577	0.176782	0.0255104	14.5152	0	0.235087	0	14.5152	6.131	0.244525	0.125423	15.4277	37.6504	0.368133	0.44198	15.4277	50.8467	0.239286	0.627737	12.6904	16.6312	0.254754	0.331032	12.6904	13.7315	0.186111	0.230997
10.4103	23.8892	0.233677	0.308774	10.4103	25.6413	0.253732	0.275229	10.719	30.1078	0.341709	0.492626	10.719	22.2124	0.176624	0.278802	10.719	9.277	0.22078	0.0849449	10.719	0.8806	0.17942	0.0120926	14.7319	0.8728	0.238597	0.0168494	14.7319	4.7997	0.248176	0.0981885	15.6579	41.6899	0.373626	0.4894	15.6579	61.2245	0.242856	0.755858	12.8798	21.9032	0.258556	0.435968	12.8798	15.6904	0.188889	0.263951
10.5634	24.3526	0.237113	0.314764	10.5634	23.3533	0.257463	0.25067	10.8766	24.8562	0.346733	0.406699	10.8766	26.4477	0.17922	0.331962	10.8766	8.646	0.224026	0.0791671	10.8766	2.6042	0.182058	0.0357616	14.9485	0.0698	0.242105	0.00134749	14.9485	1.953	0.251824	0.0399529	15.8882	50.6953	0.379121	0.595114	15.8882	46.8668	0.246428	0.578602	13.0692	22.0524	0.262358	0.438938	13.0692	9.8183	0.191667	0.165168
10.7165	21.7856	0.24055	0.281584	10.7165	22.6046	0.261195	0.242633	11.0343	26.4178	0.35176	0.43225	11.0343	22.2975	0.181819	0.27987	11.0343	9.099	0.227274	0.083315	11.0343	3.8153	0.184697	0.0523927	15.1652	0.2407	0.245615	0.00464672	15.1652	2.5371	0.255475	0.051902	16.1185	47.5976	0.384616	0.55875	16.1185	50	0.25	0.617284	13.2586	21.5723	0.26616	0.429382	13.2586	7.3704	0.194444	0.123988
10.8696	17.6008	0.243987	0.227495	10.8696	23.2746	0.264926	0.249825	11.1919	25.4478	0.356784	0.416378	11.1919	22.2767	0.184416	0.279609	11.1919	8.265	0.23052	0.0756785	11.1919	8.0419	0.187335	0.110434	15.3818	0.333	0.249123	0.00642857	15.3818	2.5729	0.259124	0.0526344	16.3487	42.444	0.390109	0.498252	16.3487	53.426	0.253571	0.65958	13.448	18.1344	0.269962	0.360953	13.448	11.5756	0.197222	0.19473
11.0227	19.2221	0.247423	0.248451	11.0227	23.4888	0.268658	0.252124	11.3495	22.0132	0.361809	0.360181	11.3495	19.3014	0.187013	0.242264	11.3495	10.254	0.233766	0.0938908	11.3495	7.7	0.189973	0.105738	15.5985	1.1463	0.252632	0.0221293	15.5985	9.2786	0.262774	0.189814	16.579	53.9061	0.395605	0.632806	16.579	61.3184	0.257143	0.757017	13.6374	15.3561	0.273764	0.305652	13.6374	10.88	0.2	0.183028
11.1758	23.6204	0.25086	0.3053	11.1758	30.6928	0.272389	0.329451	11.5071	24.043	0.366833	0.393393	11.5071	15.4961	0.18961	0.194502	11.5071	9.305	0.237012	0.0852013	11.5071	4.5814	0.192611	0.062913	15.8151	0.4774	0.25614	0.00921622	15.8151	5	0.266423	0.102286	16.8093	47.8829	0.4011	0.5621	16.8093	56.7337	0.260715	0.700416	13.8268	16.9031	0.277566	0.336444	13.8268	7.9581	0.202777	0.133875
11.3289	27.2328	0.254296	0.351991	11.3289	25.8133	0.276121	0.277075	11.6648	26.9539	0.37186	0.441021	11.6648	14.5037	0.192208	0.182045	11.6648	8.148	0.24026	0.0746072	11.6648	0.9806	0.195251	0.0134659	16.0318	0	0.25965	0	16.0318	1.8701	0.270074	0.038257	17.0395	60.5466	0.406593	0.710759	17.0395	52.4735	0.264285	0.647821	14.0162	19.1401	0.281368	0.38097	14.0162	11.0919	0.205555	0.186593
11.482	26.5634	0.257733	0.343339	11.482	23.5536	0.279852	0.25282	11.8224	28.6784	0.376884	0.469238	11.8224	16.982	0.194805	0.213152	11.8224	5.987	0.243506	0.05482	11.8224	1.4033	0.197889	0.0192705	16.2484	0.6233	0.263158	0.0120328	16.2484	1.9955	0.273723	0.0408224	17.2698	43.1278	0.412088	0.506279	17.2698	48.139	0.267857	0.594309	14.2056	16.768	0.285171	0.333755	14.2056	18.25	0.208333	0.30701
11.635	24.5614	0.261167	0.317462	11.635	20.376	0.283581	0.218712	11.98	28.2764	0.381908	0.46266	11.98	21.9343	0.197402	0.275312	11.98	6.444	0.246752	0.0590045	11.98	3.5153	0.200527	0.048273	16.4651	1.3111	0.266668	0.0253108	16.4651	5.1098	0.277373	0.104532	17.5001	42.4435	0.417584	0.498246	17.5001	54.849	0.271429	0.677148	14.395	16.3519	0.288973	0.325473	14.395	15.9067	0.21111	0.26759
11.7881	24.4379	0.264604	0.315866	11.7881	22.7688	0.287313	0.244396	12.1377	39.7197	0.386935	0.649896	12.1377	24.2	0.2	0.30375	12.1377	7	0.250001	0.0640955	12.1377	4.801	0.203167	0.0659286	16.6817	0.5123	0.270176	0.00988996	16.6817	3.5014	0.281022	0.0716289	17.7303	45.2189	0.423077	0.530827	17.7303	61.7	0.275	0.761728	14.5845	13.4976	0.292777	0.26866	14.5845	13.6739	0.213889	0.230028
11.9412	23.5551	0.26804	0.304456	11.9412	22.5522	0.291044	0.242071	12.2953	26.9545	0.39196	0.441031	12.2953	22.574	0.202597	0.283341	12.2953	4.032	0.253247	0.036919	12.2953	2.2228	0.205805	0.0305241	16.8983	0	0.273684	0	16.8983	1.5235	0.284671	0.0311666	17.9606	41.4082	0.428572	0.486093	17.9606	52.7469	0.278572	0.651196	14.7739	17.298	0.296579	0.344305	14.7739	11.3667	0.216667	0.191216
12.0943	19.1684	0.271477	0.247756	12.0943	19.3718	0.294776	0.207933	12.4529	25.089	0.396984	0.410508	12.4529	19.7481	0.205194	0.247871	12.4529	3.077	0.256493	0.0281746	12.4529	4.7655	0.208443	0.0654411	17.115	0	0.277193	0	17.115	0.4763	0.288322	0.00974377	18.1908	38.7523	0.434065	0.454915	18.1908	53.0365	0.282142	0.654772	14.9633	14.2745	0.300381	0.284124	14.9633	18.8943	0.219445	0.317848
12.2474	20.1352	0.274914	0.260253	12.2474	24.4769	0.298507	0.26273	12.6106	27.1167	0.402011	0.443685	12.6106	23.4301	0.207793	0.294086	12.6106	4.996	0.259741	0.0457459	12.6106	5.1739	0.211082	0.0710494	17.3316	0.1754	0.280701	0.0033861	17.3316	0.9489	0.29197	0.0194119	18.4211	43.9856	0.43956	0.516349	18.4211	53.2041	0.285714	0.656841	15.1527	15.8927	0.304183	0.316333	15.1527	18.4074	0.222222	0.309657
12.4005	25.9901	0.27835	0.335929	12.4005	25.4324	0.302239	0.272986	12.7682	27.2995	0.407035	0.446676	12.7682	28.9584	0.210389	0.363476	12.7682	7.203	0.262987	0.0659543	12.7682	4.0367	0.21372	0.055433	17.5483	0.6709	0.284211	0.0129517	17.5483	3.0034	0.295621	0.0614412	18.6514	37.6581	0.445056	0.44207	18.6514	52.0895	0.289286	0.64308	15.3421	18.2172	0.307985	0.362601	15.3421	12.4	0.225	0.208598
12.5536	18.9591	0.281787	0.245051	12.5536	26.4426	0.30597	0.28383	12.9258	32.4488	0.412059	0.530929	12.9258	20.2607	0.212986	0.254305	12.9258	5.085	0.266233	0.0465608	12.9258	1.7359	0.216358	0.0238378	17.7649	0.8702	0.287719	0.0167992	17.7649	2.8154	0.29927	0.0575953	18.8816	35.5606	0.450549	0.417448	18.8816	52.3316	0.292856	0.646069	15.5315	20.5361	0.311787	0.408757	15.5315	7.8867	0.227778	0.132674
12.7067	20.5704	0.285223	0.265878	12.7067	27.3579	0.309702	0.293654	13.0835	29.6005	0.417086	0.484325	13.0835	20.3441	0.215585	0.255352	13.0835	3.663	0.269481	0.0335403	13.0835	1.0406	0.218998	0.0142898	17.9816	0.7101	0.291229	0.0137085	17.9816	0.9124	0.30292	0.0186652	19.1119	33.7494	0.456044	0.396186	19.1119	42.4949	0.296428	0.524628	15.7209	17.5556	0.315589	0.349432	15.7209	6.8526	0.230555	0.115277
12.8598	16.5773	0.28866	0.214266	12.8598	25.1664	0.313433	0.270131	13.2411	34.1655	0.422111	0.559018	13.2411	21.0136	0.218182	0.263755	13.2411	4.653	0.272727	0.0426052	13.2411	1.2666	0.221636	0.0173933	18.1982	0	0.294737	0	18.1982	0.9489	0.306569	0.0194119	19.3422	35.3728	0.46154	0.415243	19.3422	51.4	0.3	0.634568	15.9103	13.9147	0.319392	0.276962	15.9103	5.8933	0.233333	0.0991397
13.0129	18.3702	0.292097	0.23744	13.0129	23.6025	0.317165	0.253345	13.3987	29.5611	0.427135	0.48368	13.3987	27.2269	0.220779	0.341743	13.3987	5.448	0.275973	0.0498846	13.3987	2.2193	0.224274	0.030476	18.4149	0	0.298246	0	18.4149	1.9663	0.31022	0.040225	19.5724	37.5648	0.467033	0.440975	19.5724	42.7296	0.303571	0.527526	16.0997	14.2162	0.323194	0.282964	16.0997	7.6065	0.236111	0.12796
13.166	19.9225	0.295533	0.257503	13.166	24.5068	0.320897	0.263051	13.5564	25.6122	0.432162	0.419068	13.5564	25.393	0.223377	0.318724	13.5564	3.999	0.279222	0.0366169	13.5564	4.1317	0.226913	0.0567376	18.6315	0	0.301755	0	18.6315	1.4577	0.313869	0.0298205	19.8027	39.7102	0.472528	0.46616	19.8027	39.1112	0.307143	0.482854	16.2891	16.2093	0.326996	0.322635	16.2891	7.7015	0.238888	0.129558
13.3191	22.7781	0.29897	0.294413	13.3191	24.6269	0.324628	0.26434	13.714	27.7443	0.437186	0.453954	13.714	22.1454	0.225974	0.277961	13.714	5.752	0.282468	0.0526682	13.714	4.8044	0.229551	0.0659753	18.8482	0.3058	0.305264	0.00590347	18.8482	1.9118	0.317519	0.0391101	20.033	46.0164	0.478023	0.540189	20.033	50.3533	0.310715	0.621646	16.4785	17.9819	0.330798	0.357917	16.4785	7.7567	0.241666	0.130487
13.4722	21.6737	0.302406	0.280138	13.4722	24.501	0.32836	0.262989	13.8716	29.2986	0.44221	0.479385	13.8716	25.4571	0.228571	0.319529	13.8716	4.082	0.285714	0.0373768	13.8716	5.593	0.232189	0.0768046	19.0648	0.0113	0.308772	0.000218147	19.0648	6.6393	0.321168	0.135822	20.2632	44.0011	0.483516	0.516531	20.2632	49.1837	0.314285	0.607206	16.668	18.3929	0.334602	0.366098	16.668	5.7748	0.244445	0.0971462
13.6253	20.466	0.305843	0.264528	13.6253	28.2876	0.332091	0.303634	14.0293	28.2912	0.447237	0.462902	14.0293	26.9317	0.231169	0.338037	14.0293	2.652	0.288962	0.024283	14.0293	8.4134	0.234829	0.115535	19.2814	0	0.31228	0	19.2814	4.1886	0.324817	0.0856871	20.4935	44.0508	0.489012	0.517114	20.4935	45.7337	0.317857	0.564614	16.8574	19.0122	0.338404	0.378425	16.8574	5.5833	0.247223	0.0939247
13.7783	19.7774	0.309277	0.255628	13.7783	32.088	0.33582	0.344426	14.1869	22.0463	0.452261	0.360723	14.1869	32.6219	0.233766	0.409459	14.1869	3.325	0.292208	0.0304454	14.1869	5.5732	0.237467	0.0765327	19.4981	0	0.31579	0	19.4981	2.1542	0.328468	0.0440689	20.7237	53.1381	0.494505	0.623791	20.7237	46.2602	0.321428	0.571114	17.0468	19.5292	0.342206	0.388715	17.0468	3.5	0.25	0.0588785
13.9314	20.9759	0.312714	0.271119	13.9314	28.0664	0.339552	0.301259	14.3445	24.6351	0.457286	0.403081	14.3445	22.8962	0.236363	0.287385	14.3445	4.752	0.295454	0.0435117	14.3445	3.6069	0.240105	0.0495309	19.7147	0	0.319298	0	19.7147	1.7308	0.332116	0.0354074	20.954	37	0.5	0.434345	20.954	50.7875	0.325	0.627006	17.2362	21.7663	0.346008	0.433243	17.2362	4.0285	0.252778	0.0677692
14.0845	23.5322	0.31615	0.30416	14.0845	26.2366	0.343283	0.281619	14.5022	21.6633	0.462313	0.354456	14.5022	19.3968	0.238962	0.243462	14.5022	5.322	0.298702	0.0487309	14.5022	4.117	0.242745	0.0565357	19.9314	0	0.322808	0	19.9314	1.971	0.335767	0.0403212	21.1843	47.375	0.505495	0.556137	21.1843	41.4	0.328572	0.511111	17.4256	24.4272	0.34981	0.486206	17.4256	6.4889	0.255556	0.109159
14.2376	21.4282	0.319587	0.276965	14.2376	28.577	0.347015	0.30674	14.6598	21.1616	0.467337	0.346247	14.6598	17.2241	0.241559	0.216191	14.6598	8.052	0.301948	0.0737282	14.6598	5.0027	0.245383	0.0686984	20.148	0	0.326316	0	20.148	3.1802	0.339416	0.065058	21.4145	61.033	0.510988	0.716469	21.4145	42.4413	0.332142	0.523967	17.615	19.837	0.353613	0.394842	17.615	7.8933	0.258333	0.132785
14.3907	19.6227	0.323024	0.253628	14.3907	26.9835	0.350746	0.289636	14.8174	24.9554	0.472361	0.408322	14.8174	20.2644	0.244155	0.254352	14.8174	7.286	0.305194	0.0667143	14.8174	5.8153	0.248021	0.0798572	20.3647	0	0.329825	0	20.3647	2.5122	0.343066	0.0513926	21.6448	49.6618	0.516484	0.582982	21.6448	53.4163	0.335714	0.65946	17.8044	17.2704	0.357415	0.343755	17.8044	6.483	0.261111	0.10906
14.5438	19.5566	0.32646	0.252774	14.5438	28.3427	0.354478	0.304225	14.9751	23.1962	0.477388	0.379538	14.9751	19.9121	0.246754	0.24993	14.9751	11.521	0.308443	0.105492	14.9751	5.9156	0.25066	0.0812346	20.5813	0.1111	0.333333	0.00214479	20.5813	4.1942	0.346715	0.0858017	21.8751	59.3132	0.521979	0.69628	21.8751	48.6913	0.339286	0.601127	17.9938	18.6364	0.361217	0.370944	17.9938	5.9352	0.263889	0.0998446
14.6969	18.5733	0.329897	0.240065	14.6969	23.9419	0.358209	0.256988	15.1327	19.6868	0.482412	0.322117	15.1327	17.9571	0.249351	0.225391	15.1327	6.613	0.311689	0.060552	15.1327	3.0371	0.253298	0.0417063	20.798	0.6399	0.336843	0.0123533	20.798	4.1181	0.350366	0.0842449	22.1053	56.8749	0.527472	0.667657	22.1053	56.1143	0.342857	0.692769	18.1832	15.7529	0.365019	0.31355	18.1832	10.68	0.266666	0.179664
14.85	20.2222	0.333333	0.261377	14.85	24.9275	0.361941	0.267567	15.2903	21.6644	0.487437	0.354474	15.2903	23.8239	0.251948	0.299029	15.2903	5.23	0.314935	0.0478885	15.2903	2.5586	0.255936	0.0351354	21.0146	0.4632	0.340351	0.00894208	21.0146	3.2658	0.354015	0.0668092	22.3356	44.6022	0.532967	0.523587	22.3356	53.4788	0.346429	0.660232	18.3726	18.6916	0.368821	0.372043	18.3726	12.1226	0.269444	0.203932
15.0031	20.0274	0.33677	0.258859	15.0031	24.0299	0.365672	0.257932	15.448	23.369	0.492464	0.382365	15.448	22.8228	0.254546	0.286464	15.448	3.752	0.318183	0.0343552	15.448	2.8581	0.258576	0.0392482	21.2313	2.6947	0.343861	0.0520212	21.2313	3.2416	0.357665	0.0663141	22.5659	40.4142	0.538463	0.474424	22.5659	56.65	0.350001	0.699383	18.562	18.6465	0.372623	0.371146	18.562	10.7193	0.272222	0.180325
15.1562	20.8165	0.340207	0.269059	15.1562	22.9444	0.369404	0.246281	15.6056	27.5246	0.497488	0.450359	15.6056	18.6441	0.257143	0.234014	15.6056	3.388	0.321429	0.0310222	15.6056	4.1559	0.261214	0.0570699	21.4479	1.2776	0.347369	0.0246641	21.4479	2.3228	0.361314	0.047518	22.7961	32.185	0.543956	0.377821	22.7961	47.2084	0.353571	0.58282	18.7514	19.6492	0.376425	0.391104	18.7514	15.615	0.274999	0.262682
15.3093	22.3381	0.343643	0.288726	15.3093	26.0381	0.373135	0.279488	15.7632	26.9365	0.502512	0.440737	15.7632	17.6109	0.25974	0.221046	15.7632	3.688	0.324675	0.0337692	15.7632	2.5041	0.263852	0.034387	21.6645	0.4826	0.350877	0.0093166	21.6645	2.8197	0.364963	0.0576832	23.0264	44.4409	0.549451	0.521694	23.0264	36.4694	0.357143	0.45024	18.9409	19.141	0.380229	0.380988	18.9409	15.5926	0.277778	0.262306
15.4624	22.3049	0.34708	0.288297	15.4624	25.6582	0.376867	0.27541	15.9209	25.0858	0.507539	0.410455	15.9209	13.4041	0.262338	0.168244	15.9209	3.237	0.327923	0.0296396	15.9209	4.4398	0.266492	0.0609685	21.8812	0.793	0.354386	0.0153089	21.8812	0.9943	0.368614	0.0203406	23.2566	49.657	0.554944	0.582926	23.2566	36.0643	0.360713	0.445238	19.1303	14.6666	0.384032	0.291928	19.1303	19.7365	0.280556	0.332016
15.6155	19.6932	0.350516	0.25454	15.6155	22.3237	0.380599	0.239618	16.0785	23.07	0.512563	0.377473	16.0785	11.6332	0.264935	0.146016	16.0785	2.017	0.331169	0.0184687	16.0785	3.4172	0.26913	0.0469259	22.0978	0.8809	0.357894	0.0170058	22.0978	1.8774	0.372263	0.0384064	23.4869	33.0237	0.56044	0.387667	23.4869	43.75	0.364285	0.540123	19.3197	16.13	0.387834	0.321056	19.3197	26.04	0.283334	0.438056
15.7685	17.2437	0.353951	0.222879	15.7685	21.5115	0.384328	0.2309	16.2361	21.6807	0.517588	0.354741	16.2361	15.704	0.267532	0.197111	16.2361	1.909	0.334415	0.0174798	16.2361	3.8833	0.271768	0.0533265	22.3145	0.0529	0.361404	0.00102124	22.3145	1.0213	0.375913	0.020893	23.7172	40.7143	0.565935	0.477947	23.7172	40.9268	0.367857	0.505269	19.5091	18.5841	0.391636	0.369904	19.5091	19.9819	0.286111	0.336144
15.9216	19.3645	0.357387	0.250291	15.9216	22.6772	0.388059	0.243413	16.3937	21.5546	0.522612	0.352678	16.3937	14.7549	0.270129	0.185198	16.3937	2.529	0.337661	0.0231568	16.3937	3.0208	0.274406	0.0414824	22.5311	0.6281	0.364912	0.0121255	22.5311	2.2609	0.379562	0.0462517	23.9474	40.5918	0.571428	0.476509	23.9474	52.0776	0.371428	0.642933	19.6985	16.987	0.395438	0.338114	19.6985	15.9274	0.288889	0.267938
16.0747	22.0317	0.360824	0.284765	16.0747	24.3819	0.391791	0.261711	16.5514	23.774	0.527639	0.388992	16.5514	12.686	0.272728	0.15923	16.5514	2.901	0.34091	0.026563	16.5514	1.88	0.277045	0.0258167	22.7478	1.3657	0.368422	0.0263649	22.7478	0.8823	0.383212	0.0180494	24.1777	34.9823	0.576923	0.410659	24.1777	51.875	0.375	0.640432	19.8879	17.7117	0.39924	0.352539	19.8879	20.8333	0.291667	0.350467
16.2278	22.1546	0.36426	0.286354	16.2278	25.9202	0.395522	0.278222	16.709	25.2253	0.532663	0.412738	16.709	12.2019	0.275324	0.153154	16.709	2.463	0.344156	0.0225525	16.709	6.7614	0.279683	0.0928493	22.9644	0.8686	0.37193	0.0167683	22.9644	2.2044	0.386861	0.0450959	24.408	38.6212	0.582419	0.453376	24.408	59.5531	0.378572	0.735223	20.0773	16.4293	0.403042	0.327014	20.0773	19.5481	0.294444	0.328847
16.3809	22.9755	0.367697	0.296964	16.3809	23.3829	0.399254	0.250988	16.8666	26.335	0.537687	0.430895	16.8666	10.6964	0.277921	0.134257	16.8666	1.736	0.347402	0.0158957	16.8666	3.9331	0.282321	0.0540104	23.1811	0.2051	0.37544	0.00395946	23.1811	3.854	0.390512	0.0788421	24.6382	42.4344	0.587912	0.498139	24.6382	48.1283	0.382142	0.594177	20.2667	14.6596	0.406844	0.291789	20.2667	21.727	0.297222	0.365501
16.534	25.1218	0.371134	0.324706	16.534	22.4215	0.402985	0.240668	17.0243	25.5276	0.542714	0.417684	17.0243	10.8382	0.28052	0.136037	17.0243	3.078	0.35065	0.0281837	17.0243	2.1187	0.284961	0.0290945	23.3977	0.5651	0.378948	0.0109093	23.3977	2.336	0.394161	0.0477881	24.8685	47.9231	0.593407	0.562571	24.8685	50.0082	0.385714	0.617385	20.4561	9.4296	0.410646	0.18769	20.4561	18	0.3	0.302804
16.6871	20.9008	0.37457	0.270148	16.6871	22.7345	0.406717	0.244028	17.1819	26.3497	0.547739	0.431135	17.1819	11.0127	0.283117	0.138228	17.1819	2.753	0.353896	0.0252079	17.1819	2.9156	0.287599	0.0400378	23.6143	0.0086	0.382456	0.000166023	23.6143	1.0895	0.39781	0.0222881	25.0988	48.72	0.598902	0.571926	25.0988	47.0467	0.389286	0.580823	20.6455	11.827	0.414448	0.235408	20.6455	18.4543	0.302777	0.310446
16.8402	19.8341	0.378007	0.256361	16.8402	22.9265	0.410448	0.246089	17.3395	28.4327	0.552763	0.465218	17.3395	9.2653	0.285714	0.116295	17.3395	2.673	0.357142	0.0244753	17.3395	3.5891	0.290237	0.0492865	23.831	0.9997	0.385965	0.0192992	23.831	0.7385	0.40146	0.0151077	25.329	43.4534	0.604395	0.510101	25.329	47.5612	0.392857	0.587175	20.8349	12.2185	0.418251	0.243201	20.8349	22.0926	0.305555	0.371651
16.9933	19.5378	0.381443	0.252531	16.9933	22.7777	0.41418	0.244491	17.4972	26.1012	0.55779	0.427069	17.4972	11.1455	0.288312	0.139894	17.4972	2.997	0.36039	0.027442	17.4972	4.253	0.292876	0.0584033	24.0476	0.0715	0.389473	0.00138031	24.0476	0.2055	0.405109	0.00420396	25.5593	46.6461	0.609891	0.547581	25.5593	49.249	0.396429	0.608012	21.0243	12.6263	0.422053	0.251318	21.0243	19.695	0.308333	0.331318
17.1464	18.5497	0.38488	0.23976	17.1464	23.9131	0.417911	0.256679	17.6548	23.953	0.562814	0.39192	17.6548	12.7818	0.290909	0.160433	17.6548	2.554	0.363636	0.0233857	17.6548	6.8694	0.295514	0.0943324	24.2643	0.4912	0.392983	0.00948263	24.2643	4.1246	0.40876	0.0843778	25.7896	40.0769	0.615386	0.470465	25.7896	47.8	0.400001	0.590123	21.2138	8.3961	0.425857	0.167118	21.2138	17.0607	0.311112	0.287003
17.2995	22.8928	0.388316	0.295895	17.2995	19.4637	0.421643	0.20892	17.8124	23.9635	0.567838	0.392092	17.8124	12.1013	0.293506	0.151891	17.8124	3.756	0.366882	0.0343918	17.8124	10.5426	0.298152	0.144774	24.4809	1.981	0.396491	0.0382432	24.4809	2.8231	0.412409	0.0577528	26.0198	34.7267	0.620879	0.407658	26.0198	44.2306	0.403571	0.546057	21.4032	10.2969	0.429659	0.204953	21.4032	13.7091	0.313889	0.230621
17.4526	21.606	0.391753	0.279263	17.4526	21.726	0.425374	0.233203	17.9701	22.3528	0.572865	0.365738	17.9701	13.3203	0.296104	0.167192	17.9701	2.086	0.370131	0.0191005	17.9701	12.9239	0.300792	0.177474	24.6976	1.2	0.400001	0.023166	24.6976	2.2073	0.416059	0.0451552	26.2501	43.9486	0.626374	0.515915	26.2501	50.7602	0.407143	0.626669	21.5926	11.8322	0.433461	0.235512	21.5926	11.2533	0.316667	0.189308
17.6057	21.0275	0.39519	0.271786	17.6057	19.9267	0.429106	0.213889	18.1277	24.2627	0.577889	0.396988	18.1277	18.0425	0.298701	0.226463	18.1277	2.026	0.373377	0.0185511	18.1277	12.6837	0.30343	0.174176	24.9142	2.554	0.403509	0.049305	24.9142	2.0446	0.419708	0.0418268	26.4803	41.9323	0.631867	0.492245	26.4803	41.9758	0.410713	0.51822	21.782	20.572	0.437263	0.409471	21.782	11.9167	0.319445	0.200468
17.7588	18.7959	0.398626	0.242942	17.7588	21.501	0.432837	0.230788	18.2853	25.6336	0.582914	0.419418	18.2853	13.5729	0.301298	0.170362	18.2853	2.911	0.376623	0.0266546	18.2853	13.9561	0.306068	0.191649	25.1309	1.1368	0.407018	0.0219459	25.1309	4.2225	0.423359	0.0863806	26.7106	38.0051	0.637363	0.446144	26.7106	45.3224	0.414285	0.559536	21.9714	21.031	0.441065	0.418607	21.9714	14.4578	0.322222	0.243216
17.9118	19.4682	0.402061	0.251631	17.9118	26.9616	0.436567	0.289401	18.443	19.3954	0.587941	0.317349	18.443	13.3015	0.303897	0.166956	18.443	1.746	0.379871	0.0159873	18.443	15.0665	0.308708	0.206897	25.3475	0.1684	0.410526	0.00325097	25.3475	2.976	0.427007	0.0608807	26.9409	45.3265	0.642858	0.53209	26.9409	43.6801	0.417857	0.53926	22.1608	19.1175	0.444867	0.38052	22.1608	11.96	0.325	0.201196
18.0649	24.9106	0.405497	0.321976	18.0649	32.8877	0.440298	0.35301	18.6006	18.8887	0.592965	0.309058	18.6006	12.4649	0.306493	0.156455	18.6006	2.07	0.383117	0.018954	18.6006	11.1129	0.311346	0.152605	25.5642	0.4713	0.414036	0.00909846	25.5642	0.6678	0.430658	0.0136613	27.1711	38.8232	0.648351	0.455747	27.1711	51.0949	0.421428	0.630801	22.3502	14.9679	0.448669	0.297926	22.3502	15.8526	0.327778	0.266679
18.218	21.1942	0.408934	0.27394	18.218	23.8062	0.44403	0.255531	18.7582	21.191	0.597989	0.346728	18.7582	14.9848	0.30909	0.188084	18.7582	2.868	0.386363	0.0262609	18.7582	4.8392	0.313984	0.0664532	25.7808	1.4478	0.417544	0.0279498	25.7808	1.5072	0.434307	0.0308331	27.4014	44.7041	0.653847	0.524783	27.4014	47.275	0.425	0.583642	22.5396	14.5571	0.452472	0.289749	22.5396	15.7157	0.330555	0.264376
18.3711	20.2867	0.41237	0.262211	18.3711	19.3134	0.447761	0.207306	18.9159	21.9636	0.603016	0.35937	18.9159	18.1208	0.311689	0.227446	18.9159	4.439	0.389611	0.0406457	18.9159	2.7674	0.316623	0.0380027	25.9974	0.2632	0.421052	0.00508108	25.9974	6.451	0.437956	0.13197	27.6317	43.8422	0.659342	0.514666	27.6317	53.551	0.428572	0.661123	22.729	14.436	0.456274	0.287338	22.729	12.3333	0.333333	0.207476
18.5242	20.5076	0.415807	0.265066	18.5242	21.5955	0.451493	0.231802	19.0735	23.7667	0.60804	0.388872	19.0735	14.0441	0.314286	0.176277	19.0735	3.204	0.392857	0.0293374	19.0735	5.3629	0.319261	0.0736448	26.2141	0.6364	0.424562	0.0122857	26.2141	2.4267	0.441606	0.0496435	27.8619	42.166	0.664835	0.494989	27.8619	48.4293	0.432142	0.597893	22.9184	16.7631	0.460076	0.333658	22.9184	13.342	0.33611	0.224445
18.6773	23.0817	0.419244	0.298337	18.6773	25.3301	0.455224	0.271888	19.2311	22.99	0.613065	0.376164	19.2311	11.9117	0.316883	0.149511	19.2311	3.014	0.396103	0.0275977	19.2311	7.2797	0.321899	0.0999668	26.4307	0.0038	0.42807	7.33591e-05	26.4307	1.8078	0.445255	0.0369826	28.0922	44.4873	0.67033	0.522238	28.0922	52.5459	0.435714	0.648715	23.1078	17.8609	0.463878	0.355509	23.1078	15.0948	0.338888	0.253931
18.8304	23.6191	0.42268	0.305283	18.8304	25.8949	0.458956	0.277951	19.3888	23.2921	0.618092	0.381107	19.3888	15.1394	0.319481	0.190024	19.3888	2.527	0.399352	0.0231385	19.3888	7.6653	0.324539	0.105262	26.6474	0.6216	0.431579	0.012	26.6474	0.6811	0.448906	0.0139334	28.3225	41.0768	0.675826	0.482202	28.3225	53.0625	0.439286	0.655093	23.2972	17.1959	0.46768	0.342272	23.2972	12.1183	0.341666	0.203859
18.9835	22.6965	0.426117	0.293358	18.9835	23.2032	0.462687	0.249059	19.5464	24.2412	0.623116	0.396636	19.5464	19.1083	0.322078	0.239841	19.5464	2.182	0.402598	0.0199795	19.5464	6.1847	0.327177	0.0849299	26.864	0.6654	0.435088	0.0128456	26.864	2.015	0.452555	0.0412213	28.5527	36.0876	0.681319	0.423634	28.5527	57.751	0.442857	0.712975	23.4867	17.0509	0.471484	0.339386	23.4867	11.1141	0.344445	0.186966
19.1366	25.3373	0.429553	0.327491	19.1366	24.0277	0.466419	0.257909	19.704	25.35	0.62814	0.414778	19.704	21.0196	0.324675	0.263831	19.704	1.909	0.405844	0.0174798	19.704	4.9207	0.329815	0.0675724	27.0807	1.3666	0.438597	0.0263822	27.0807	2.7843	0.456205	0.056959	28.783	36.4066	0.686814	0.427379	28.783	35.0574	0.446429	0.432807	23.6761	16.183	0.475286	0.322111	23.6761	17.9213	0.347223	0.30148
19.2897	25.6741	0.43299	0.331844	19.2897	27.227	0.47015	0.292249	19.8617	26.8474	0.633167	0.439279	19.8617	20.3197	0.327273	0.255046	19.8617	1.736	0.409092	0.0158957	19.8617	7.4008	0.332455	0.10163	27.2973	0.1928	0.442105	0.00372201	27.2973	2.5696	0.459854	0.0525669	29.0132	51.0237	0.692307	0.59897	29.0132	44.85	0.449999	0.553704	23.8655	12.0928	0.479088	0.240699	23.8655	16.48	0.35	0.277234
19.4428	23.9706	0.436426	0.309826	19.4428	26.2983	0.473882	0.282281	20.0193	27.0848	0.638191	0.443163	20.0193	16.9	0.32987	0.212123	20.0193	1.723	0.412338	0.0157767	20.0193	8.2826	0.335093	0.113739	27.514	1.854	0.445615	0.0357915	27.514	3.6726	0.463505	0.0751312	29.2435	39.9947	0.697802	0.4695	29.2435	50.7421	0.453571	0.626446	24.0549	16.9909	0.48289	0.338192	24.0549	13.0535	0.352778	0.219592
19.5959	24.7989	0.439863	0.320532	19.5959	28.5505	0.477613	0.306456	20.1769	24.2497	0.643216	0.396775	20.1769	12.1219	0.332467	0.15215	20.1769	2.187	0.415584	0.0200253	20.1769	6.7435	0.337731	0.0926035	27.7306	3.6998	0.449123	0.0714247	27.7306	5.7699	0.467153	0.118036	29.4738	41.5705	0.703298	0.487998	29.4738	53.3959	0.457143	0.659209	24.2443	19.4525	0.486693	0.387188	24.2443	10.4193	0.355556	0.175278
19.749	29.3323	0.4433	0.379128	19.749	28.7264	0.481345	0.308344	20.3346	33.6722	0.648243	0.550947	20.3346	8.7614	0.335066	0.10997	20.3346	2.961	0.418832	0.0271124	20.3346	5.0046	0.34037	0.0687245	27.9473	2.1169	0.452633	0.0408668	27.9473	5.5696	0.470804	0.113939	29.704	61.0235	0.708791	0.716358	29.704	57.3513	0.460714	0.708041	24.4337	19.3335	0.490495	0.38482	24.4337	11.9333	0.358333	0.200747
19.9021	29.0057	0.446736	0.374906	19.9021	27.2702	0.485076	0.292713	20.4922	31.3345	0.653267	0.512697	20.4922	9.9884	0.337663	0.125371	20.4922	2.33	0.422078	0.0213347	20.4922	6.9079	0.343008	0.0948611	28.1639	1.109	0.456141	0.0214093	28.1639	4.4088	0.474453	0.0901918	29.9343	51.7143	0.714286	0.607077	29.9343	53.0459	0.464286	0.654888	24.6231	18.2376	0.494297	0.363007	24.6231	13.0185	0.361111	0.219003
20.0551	24.333	0.450171	0.31451	20.0551	29.151	0.488805	0.312901	20.6498	30.3034	0.658291	0.495826	20.6498	14.968	0.340259	0.187873	20.6498	1.255	0.425324	0.0114914	20.6498	5.483	0.345646	0.075294	28.3805	4.7389	0.459649	0.0914846	28.3805	5.1187	0.478102	0.104714	30.1646	55.4734	0.719781	0.651205	30.1646	51.2745	0.467858	0.633019	24.8125	18.7193	0.498099	0.372595	24.8125	18.6256	0.363888	0.313328
20.2082	21.9641	0.453607	0.283892	20.2082	29.368	0.492537	0.31523	20.8074	32.5652	0.663315	0.532834	20.8074	11.4008	0.342856	0.143099	20.8074	1.918	0.428571	0.0175622	20.8074	6.5188	0.348284	0.0895179	28.5972	7.8305	0.463158	0.151168	28.5972	9.3921	0.481752	0.192136	30.3948	59.3176	0.725274	0.696332	30.3948	54.9347	0.471428	0.678206	25.0019	19.8671	0.501901	0.395441	25.0019	14.5467	0.366666	0.244711
20.3613	20.6612	0.457044	0.267051	20.3613	28.96	0.496268	0.310851	20.9651	30.5124	0.668342	0.499246	20.9651	10.3408	0.345455	0.129794	20.9651	3.835	0.431819	0.0351152	20.9651	6.5407	0.350924	0.0898186	28.8138	8.4	0.466666	0.162162	28.8138	11.2714	0.485401	0.230581	30.6251	57.3314	0.73077	0.673016	30.6251	54.075	0.475	0.667593	25.1913	18.0957	0.505703	0.360182	25.1913	11.0941	0.369444	0.18663
20.5144	22.5078	0.46048	0.290919	20.5144	31	0.5	0.332748	21.1227	27.7209	0.673367	0.453571	21.1227	9.9506	0.348052	0.124896	21.1227	2.734	0.435065	0.0250339	21.1227	7.1803	0.353562	0.0986018	29.0305	12.3105	0.470176	0.237654	29.0305	7.1937	0.489052	0.147163	30.8554	54.7758	0.736265	0.643016	30.8554	45.8051	0.478572	0.565495	25.3807	14.3536	0.509505	0.285698	25.3807	8.6407	0.372221	0.145358
20.6675	28.2973	0.463917	0.36575	20.6675	25.915	0.503732	0.278167	21.2803	25.466	0.678391	0.416676	21.2803	10.7944	0.350649	0.135488	21.2803	2.484	0.438311	0.0227448	21.2803	10.2759	0.3562	0.141111	29.2471	16.7091	0.473684	0.322569	29.2471	7.1794	0.492701	0.146871	31.0856	52.5953	0.741758	0.617419	31.0856	41.4974	0.482142	0.512314	25.5702	16.999	0.513309	0.338353	25.5702	8.625	0.375001	0.145094
20.8206	30.379	0.467354	0.392656	20.8206	25.1459	0.507463	0.269911	21.438	23.6423	0.683418	0.386837	21.438	10.5117	0.353247	0.131939	21.438	1.961	0.441559	0.0179559	21.438	9.2498	0.358839	0.127021	29.4638	21.7517	0.477194	0.419917	29.4638	9.6533	0.496351	0.19748	31.3159	56.6415	0.747254	0.664917	31.3159	43.2367	0.485714	0.533786	25.7596	17.2761	0.517112	0.343869	25.7596	5.96	0.377778	0.100262
20.9737	26.3659	0.47079	0.340786	20.9737	31.4162	0.511195	0.337215	21.5956	17.9083	0.688442	0.293017	21.5956	11.2548	0.355844	0.141266	21.5956	1.505	0.444805	0.0137805	21.5956	6.1176	0.361477	0.0840085	29.6804	21.3384	0.480702	0.411938	29.6804	11	0.5	0.225029	31.5461	55.0591	0.752746	0.646341	31.5461	35.6707	0.489285	0.440379	25.949	20.2529	0.520914	0.40312	25.949	6.382	0.380556	0.107361
21.1268	28.1425	0.474227	0.363749	21.1268	30.1198	0.514926	0.3233	21.7532	21.7472	0.693466	0.355829	21.7532	10.2273	0.358441	0.128369	21.7532	5.454	0.448051	0.0499396	21.7532	12.6882	0.364115	0.174238	29.8971	12.0881	0.484211	0.233361	29.8971	16.9251	0.503651	0.34624	31.7764	48.8731	0.758242	0.573724	31.7764	40.4786	0.492857	0.499736	26.1384	14.752	0.524716	0.293628	26.1384	5.9533	0.383334	0.100149
21.2799	26.6393	0.477663	0.34432	21.2799	27.4265	0.518658	0.294391	21.9109	25.2514	0.698493	0.413165	21.9109	11.3653	0.361039	0.142653	21.9109	3.755	0.451299	0.0343827	21.9109	21.3415	0.366755	0.293067	30.1137	18.1551	0.487719	0.350485	30.1137	19.2875	0.507299	0.394569	32.0067	54.7028	0.763737	0.642159	32.0067	48.5431	0.496429	0.599298	26.3278	17.0661	0.528518	0.339689	26.3278	5.38	0.386111	0.0905047
21.433	25.7928	0.4811	0.333379	21.433	27.3277	0.522389	0.29333	22.0685	34.7638	0.703518	0.568807	22.0685	14.0992	0.363636	0.176968	22.0685	1.339	0.454545	0.0122606	22.0685	16.537	0.369393	0.22709	30.3304	22.129	0.491229	0.427201	30.3304	16.9377	0.51095	0.346498	32.2369	53.8521	0.76923	0.632172	32.2369	47	0.499999	0.580247	26.5172	17.9657	0.53232	0.357595	26.5172	8.2222	0.388889	0.138317
21.5861	26.7587	0.484536	0.345863	21.5861	25.3052	0.526121	0.271621	22.2261	29.8464	0.708542	0.488349	22.2261	14.7948	0.366233	0.185699	22.2261	0.599	0.457792	0.00548475	22.2261	21.2721	0.372031	0.292114	30.547	21.549	0.494737	0.416004	30.547	21.9038	0.514599	0.448091	32.4672	52.1395	0.774726	0.612068	32.4672	43.6255	0.503571	0.538586	26.7066	20.4476	0.536122	0.406995	26.7066	7.5817	0.391666	0.127543
21.7392	23.7037	0.487973	0.306376	21.7392	29.0238	0.529852	0.311536	22.3838	32.9704	0.713569	0.539464	22.3838	14.7796	0.368832	0.185508	22.3838	2.039	0.46104	0.0186701	22.3838	22.3866	0.374671	0.307419	30.7636	25.2656	0.498245	0.487753	30.7636	28.4735	0.518248	0.582489	32.6975	59.8708	0.780221	0.702826	32.6975	46.0245	0.507143	0.568204	26.896	20.3598	0.539924	0.405248	26.896	9.8089	0.394444	0.16501
21.8923	22.9017	0.49141	0.29601	21.8923	26.0149	0.533584	0.279239	22.5414	31.8584	0.718593	0.521269	22.5414	18.538	0.371428	0.232682	22.5414	0.898	0.464286	0.00822254	22.5414	22.6306	0.377309	0.310769	30.9803	23.6498	0.501755	0.45656	30.9803	27.8966	0.521898	0.570687	32.9277	58.0816	0.785714	0.681823	32.9277	38.7974	0.510714	0.47898	27.0854	17.2832	0.543726	0.34401	27.0854	13.7239	0.397222	0.23087
22.0453	21.4988	0.494844	0.277878	22.0453	23.076	0.537313	0.247693	22.699	31.7313	0.723617	0.519189	22.699	19.5395	0.374025	0.245253	22.699	1.506	0.467532	0.0137897	22.699	25.9556	0.379947	0.356429	31.1969	25.5795	0.505263	0.493813	31.1969	18.0061	0.525547	0.368355	33.158	58.4477	0.791209	0.68612	33.158	45.0939	0.514286	0.556715	27.2748	17.5911	0.547528	0.350139	27.2748	13	0.399999	0.218692
22.1984	24.8094	0.498281	0.320668	22.1984	25.0904	0.541044	0.269315	22.8567	29.6105	0.728644	0.484489	22.8567	21.7006	0.376624	0.272378	22.8567	1.481	0.47078	0.0135608	22.8567	24.762	0.382586	0.340038	31.4136	18.5522	0.508773	0.358151	31.4136	23.4481	0.529198	0.479683	33.3883	53.0289	0.796705	0.622509	33.3883	47.7143	0.517858	0.589065	27.4642	19.8739	0.551331	0.395576	27.4642	14.4028	0.402777	0.24229
22.3515	27.7991	0.501717	0.359311	22.3515	23.7336	0.544776	0.254752	23.0143	27.763	0.733668	0.45426	23.0143	12.7091	0.379221	0.15952	23.0143	1	0.474026	0.0091565	23.0143	19.7051	0.385224	0.270596	31.6302	16.5838	0.512281	0.320151	31.6302	22.9884	0.532847	0.470279	33.6185	45.2412	0.802198	0.531089	33.6185	46.9082	0.521428	0.579114	27.6536	20.0685	0.555133	0.399449	27.6536	12.1956	0.405555	0.20516
22.5046	24.5852	0.505154	0.31777	22.5046	23.7466	0.548507	0.254891	23.1719	29.84	0.738693	0.488244	23.1719	13.3246	0.381818	0.167246	23.1719	1.438	0.477272	0.0131671	23.1719	23.9459	0.387862	0.328831	31.8469	19.1346	0.51579	0.369394	31.8469	29.7156	0.536497	0.607899	33.8488	52.1006	0.807693	0.611611	33.8488	43.4125	0.525	0.535957	27.8431	16.7355	0.558937	0.333108	27.8431	16.9267	0.408334	0.284748
22.6577	24.1206	0.50859	0.311765	22.6577	22.7169	0.552239	0.243839	23.3296	26.2117	0.74372	0.428877	23.3296	12.0039	0.384416	0.150669	23.3296	2.992	0.48052	0.0273963	23.3296	27.2519	0.390502	0.37423	32.0635	17.696	0.519298	0.341622	32.0635	27.9808	0.540146	0.572409	34.0791	51.6974	0.813188	0.606878	34.0791	46.3714	0.528572	0.572486	28.0325	14.2912	0.562739	0.284456	28.0325	17.6	0.411111	0.296075
22.8108	24.5316	0.512027	0.317077	22.8108	19.1817	0.55597	0.205893	23.4872	29.0231	0.748744	0.474878	23.4872	11.3385	0.387013	0.142317	23.4872	2.156	0.483766	0.0197414	23.4872	28.0569	0.39314	0.385285	32.2802	21.882	0.522808	0.422432	32.2802	20.8646	0.543797	0.426832	34.3093	57.4711	0.818681	0.674656	34.3093	40.1028	0.532142	0.495096	28.2219	18.5269	0.566541	0.368765	28.2219	15.0546	0.413889	0.253255
22.9639	25.4168	0.515464	0.328519	22.9639	21.8187	0.559702	0.234198	23.6448	27.7	0.753768	0.453229	23.6448	9.2769	0.38961	0.11644	23.6448	2	0.487013	0.018313	23.6448	27.8428	0.395778	0.382345	32.4968	23.1025	0.526316	0.445994	32.4968	17.0084	0.547445	0.347945	34.5396	65.4463	0.824177	0.768277	34.5396	36.8367	0.535714	0.454774	28.4113	21.3649	0.570343	0.425253	28.4113	14.5	0.416667	0.243925
23.117	25.4578	0.5189	0.329049	23.117	23.3565	0.563433	0.250704	23.8025	30.7418	0.758795	0.502999	23.8025	11.411	0.392208	0.143227	23.8025	2.169	0.490261	0.0198605	23.8025	24.5894	0.398418	0.337668	32.7135	17.8936	0.529826	0.345436	32.7135	23.8377	0.551096	0.487653	34.7698	68.2145	0.82967	0.800773	34.7698	42.9077	0.539285	0.529725	28.6007	18.0786	0.574145	0.359842	28.6007	14.565	0.419444	0.245019
23.2701	23.5844	0.522337	0.304834	23.2701	17.1085	0.567165	0.183639	23.9601	32.078	0.763819	0.524862	23.9601	11.2341	0.394805	0.141006	23.9601	2.99	0.493507	0.0273779	23.9601	13.6841	0.401056	0.187914	32.9301	16.4	0.533334	0.316602	32.9301	19.2847	0.554745	0.394511	35.0001	62.3352	0.835165	0.731756	35.0001	51.7143	0.542857	0.638448	28.7901	19.3546	0.577947	0.38524	28.7901	12.4993	0.422222	0.210269
23.4232	23.4433	0.525773	0.303011	23.4232	17.9691	0.570897	0.192877	24.1177	32.4832	0.768844	0.531492	24.1177	12.8896	0.397402	0.161786	24.1177	1.828	0.496753	0.0167381	24.1177	7.8895	0.403694	0.108341	33.1467	15.5396	0.536842	0.299992	33.1467	11.8771	0.558394	0.242972	35.2304	53.8685	0.84066	0.632365	35.2304	42.9929	0.546429	0.530777	28.9795	17.2171	0.581749	0.342694	28.9795	15.32	0.425	0.25772
23.5763	23.7148	0.52921	0.30652	23.5763	21.2898	0.574628	0.228521	24.2754	33.9708	0.773871	0.555832	24.2754	11.84	0.400001	0.148612	24.2754	1	0.500001	0.0091565	24.2754	4.8491	0.406333	0.0665891	33.3634	20.9977	0.540351	0.405361	33.3634	11.321	0.562044	0.231596	35.4606	55.5325	0.846153	0.651899	35.4606	47.4	0.549999	0.585185	29.1689	17.7833	0.585552	0.353964	29.1689	10.1067	0.427777	0.170019
23.7294	25.8106	0.532646	0.333609	23.7294	24.1908	0.57836	0.259659	24.433	34.8796	0.778895	0.570702	24.433	8.4156	0.402598	0.10563	24.433	1.558	0.503247	0.0142658	24.433	2.6266	0.408971	0.0360692	33.58	23.7981	0.543859	0.459423	33.58	18.963	0.565693	0.38793	35.6909	45.5876	0.851649	0.535155	35.6909	48.3941	0.553571	0.597458	29.3583	15.2434	0.589354	0.303409	29.3583	9.2917	0.430555	0.156309
23.8825	31.6888	0.536083	0.409586	23.8825	22.5346	0.582091	0.241882	24.5906	36.4408	0.783919	0.596247	24.5906	8.0427	0.405194	0.100949	24.5906	1.415	0.506493	0.0129565	24.5906	3.874	0.411609	0.0531988	33.7967	20.0587	0.547369	0.387234	33.7967	20.7591	0.569344	0.424673	35.9212	48.1429	0.857144	0.565152	35.9212	45.2122	0.557143	0.558175	29.5477	26.078	0.593156	0.519064	29.5477	12.6933	0.433333	0.213532
24.0356	22.2945	0.53952	0.288162	24.0356	24.7404	0.585823	0.265559	24.7483	33.2229	0.788946	0.543595	24.7483	8.8394	0.407793	0.110949	24.7483	2.329	0.509741	0.0213255	24.7483	3.2245	0.414249	0.0442797	34.0133	20.3066	0.550877	0.392019	34.0133	17.1315	0.572993	0.350463	36.1514	53.9237	0.862637	0.633013	36.1514	47.5957	0.560714	0.587601	29.7371	18.3428	0.596958	0.365101	29.7371	10.6243	0.43611	0.178727
24.1886	21.2078	0.542954	0.274116	24.1886	21.8842	0.589552	0.234901	24.9059	29.3389	0.79397	0.480045	24.9059	8.4112	0.41039	0.105574	24.9059	2.278	0.512987	0.0208585	24.9059	3.6731	0.416887	0.05044	34.23	21.8869	0.554387	0.422527	34.23	20.6576	0.576643	0.422597	36.3817	56.5715	0.868133	0.664095	36.3817	41.6857	0.564286	0.514638	29.9265	17.7065	0.60076	0.352435	29.9265	10.1007	0.438888	0.169918
24.3417	20.5709	0.546391	0.265884	24.3417	24.099	0.593283	0.258674	25.0635	28.9015	0.798995	0.472888	25.0635	8.3268	0.412987	0.104515	25.0635	2.883	0.516234	0.0263982	25.0635	4.4085	0.419525	0.0605387	34.4466	22.108	0.557895	0.426795	34.4466	22.888	0.580292	0.468225	36.612	58.3283	0.873628	0.684719	36.612	37.7607	0.567858	0.466181	30.116	17.2619	0.604564	0.343586	30.116	7.19	0.441667	0.120953
24.4948	27.0783	0.549827	0.349994	24.4948	23.5449	0.597015	0.252726	25.2211	32.1822	0.804019	0.526567	25.2211	7.6559	0.415584	0.0960942	25.2211	3.632	0.51948	0.0332564	25.2211	3.4435	0.422163	0.0472871	34.6633	26.6374	0.561404	0.514236	34.6633	24.018	0.583943	0.491341	36.8422	59.9717	0.879121	0.704011	36.8422	35.4082	0.571428	0.437138	30.3054	20.0117	0.608366	0.398319	30.3054	11.1481	0.444445	0.187538
24.6479	23.2926	0.553264	0.301063	24.6479	29.983	0.600746	0.321832	25.3788	28.7939	0.809046	0.471128	25.3788	8.359	0.418182	0.104919	25.3788	1.455	0.522728	0.0133227	25.3788	3.9681	0.424802	0.054491	34.8799	33.5093	0.564912	0.646898	34.8799	28.6844	0.587591	0.586803	37.0725	71.9763	0.884616	0.844933	37.0725	37.65	0.575	0.464815	30.4948	16.0805	0.612168	0.320071	30.4948	6.1943	0.447222	0.104203
24.801	21.487	0.5567	0.277725	24.801	27.0227	0.604478	0.290056	25.5364	31.8508	0.81407	0.521145	25.5364	11.4129	0.420779	0.143251	25.5364	1.795	0.525974	0.0164359	25.5364	3.3807	0.42744	0.0464247	35.0966	15.0072	0.568422	0.289714	35.0966	37.8344	0.591242	0.773987	37.3027	56.6861	0.890109	0.665441	37.3027	32.2061	0.578571	0.397606	30.6842	15.8861	0.61597	0.316202	30.6842	9.62	0.45	0.161832
24.9541	23.5058	0.560137	0.303819	24.9541	26.4382	0.608209	0.283783	25.694	38.2797	0.819094	0.626335	25.694	10.2555	0.423376	0.128723	25.694	2.977	0.52922	0.0272589	25.694	4.0663	0.430078	0.0558395	35.3132	12.1876	0.57193	0.235282	35.3132	34.283	0.594891	0.701335	37.533	58.6165	0.895605	0.688102	37.533	36.3742	0.582143	0.449064	30.8736	23.8282	0.619773	0.474284	30.8736	11.15	0.452778	0.18757
25.1072	24.7535	0.563574	0.319945	25.1072	26.4542	0.611941	0.283954	25.8517	32.6934	0.824121	0.534931	25.8517	13.797	0.425974	0.173175	25.8517	2.754	0.532468	0.025217	25.8517	3.3792	0.432718	0.0464041	35.5298	20.7642	0.575438	0.400853	35.5298	31.424	0.59854	0.642848	37.7633	65.3771	0.9011	0.767465	37.7633	44.8776	0.585715	0.554044	31.063	26.8469	0.623575	0.534369	31.063	10.483	0.455555	0.17635
25.2603	23.7938	0.56701	0.307541	25.2603	23.4081	0.615672	0.251258	26.0093	35.2261	0.829146	0.576372	26.0093	18.7551	0.428571	0.235407	26.0093	3.082	0.535714	0.0282203	26.0093	1.4442	0.435356	0.0198321	35.7465	25.8615	0.578948	0.499257	35.7465	25.6849	0.60219	0.525442	37.9935	64.7523	0.906593	0.76013	37.9935	40.5906	0.589285	0.501119	31.2524	22.9443	0.627377	0.45669	31.2524	6.125	0.458333	0.103037
25.4134	18.442	0.570447	0.238368	25.4134	23.89	0.619404	0.256431	26.1669	42.6177	0.83417	0.697313	26.1669	19.3463	0.431168	0.242828	26.1669	1.652	0.53896	0.0151265	26.1669	3.2055	0.437994	0.0440188	35.9631	25.7219	0.582456	0.496562	35.9631	11.8609	0.605839	0.242641	38.2238	61.423	0.912088	0.721047	38.2238	49.0541	0.592857	0.605606	31.4418	16.8152	0.631179	0.334695	31.4418	6.5289	0.461111	0.109832
25.5665	21.0889	0.573883	0.272579	25.5665	23.1127	0.623135	0.248087	26.3246	51.2427	0.839197	0.838436	26.3246	18.8737	0.433767	0.236896	26.3246	2.661	0.542208	0.0243655	26.3246	5.8859	0.440634	0.0808267	36.1798	20.2461	0.585966	0.390851	36.1798	15.3963	0.60949	0.314965	38.4541	60.4118	0.917584	0.709177	38.4541	51.8543	0.596429	0.640177	31.6312	17.8151	0.634981	0.354597	31.6312	5.4654	0.463888	0.0919414
25.7196	21.2219	0.57732	0.274299	25.7196	22.5707	0.626867	0.24227	26.4822	33.8556	0.844221	0.553947	26.4822	24.1481	0.436363	0.303099	26.4822	2.595	0.545455	0.0237611	26.4822	4.9997	0.443272	0.0686572	36.3964	19.8338	0.589474	0.382892	36.3964	23.2022	0.613139	0.474652	38.6843	59.716	0.923077	0.701009	38.6843	40.2	0.599999	0.496296	31.8206	14.182	0.638783	0.282283	31.8206	8.96	0.466666	0.150729
25.8727	25.6707	0.580756	0.3318	25.8727	20.382	0.630599	0.218776	26.6398	35.0854	0.849245	0.574069	26.6398	30.2714	0.43896	0.379956	26.6398	1.885	0.548701	0.01726	26.6398	2.6568	0.44591	0.0364839	36.6131	22.3547	0.592983	0.431558	36.6131	29.2446	0.616789	0.598263	38.9146	62.5714	0.928572	0.734529	38.9146	38.2594	0.603571	0.472338	32.01	19.013	0.642585	0.37844	32.01	11.2309	0.469444	0.188931
26.0258	32.1734	0.584193	0.415849	26.0258	25.6654	0.63433	0.275487	26.7975	37.775	0.854272	0.618077	26.7975	39.7674	0.441559	0.499146	26.7975	3.169	0.551949	0.029017	26.7975	0.9335	0.448549	0.0128191	36.8297	35.679	0.596491	0.688784	36.8297	28.387	0.620438	0.580719	39.1449	61.8929	0.934067	0.726564	39.1449	33.5459	0.607143	0.414147	32.1995	16.9621	0.646389	0.337619	32.1995	16.3519	0.472223	0.275079
26.1789	36.6935	0.58763	0.474273	26.1789	22.9131	0.638062	0.245945	26.9551	39.5055	0.859296	0.646391	26.9551	34.4026	0.444156	0.431809	26.9551	3.247	0.555195	0.0297312	26.9551	0.5061	0.451187	0.0069499	37.0464	30.2	0.600001	0.583012	37.0464	27.3721	0.624089	0.559957	39.3751	59.7252	0.93956	0.701117	39.3751	35.848	0.610714	0.442568	32.3889	12.7063	0.650192	0.25291	32.3889	17.225	0.475	0.289767
26.3319	30.6497	0.591064	0.396155	26.3319	30.6554	0.641791	0.329049	27.1127	35.3867	0.864321	0.578999	27.1127	41.3351	0.446753	0.518824	27.1127	1.126	0.558441	0.0103102	27.1127	1.8553	0.453825	0.0254775	37.263	33.8172	0.603509	0.652842	37.263	27.8309	0.627737	0.569343	39.6054	72.6521	0.945056	0.852866	39.6054	36.8571	0.614286	0.455026	32.5783	20.5389	0.653994	0.408812	32.5783	12.3304	0.477778	0.207427
26.485	31.5018	0.594501	0.407169	26.485	25.6636	0.645522	0.275468	27.2704	38.9551	0.869348	0.637386	27.2704	40.4364	0.449351	0.507544	27.2704	2.578	0.561689	0.0236055	27.2704	1.9129	0.456465	0.0262684	37.4797	25.0708	0.607019	0.483992	37.4797	34.9441	0.631388	0.714859	39.8356	54.9458	0.950549	0.645011	39.8356	35.1883	0.617856	0.434423	32.7677	25.221	0.657796	0.502006	32.7677	18.0954	0.480556	0.304409
26.6381	29.9103	0.597937	0.386598	26.6381	24.0829	0.649254	0.258501	27.428	37.212	0.874372	0.608865	27.428	37.4727	0.451948	0.470344	27.428	2.858	0.564935	0.0261693	27.428	1.5409	0.459103	0.02116	37.6963	22.5468	0.610527	0.435266	37.6963	34.4375	0.635037	0.704495	40.0659	61.1958	0.956044	0.71838	40.0659	36.0949	0.621428	0.445616	32.9571	20.6187	0.661598	0.410401	32.9571	13.2	0.483333	0.222056
26.7912	30.7767	0.601374	0.397797	26.7912	20.8618	0.652985	0.223927	27.5856	35.384	0.879396	0.578955	27.5856	31.9339	0.454545	0.400823	27.5856	2.397	0.568181	0.0219481	27.5856	2.1207	0.461741	0.029122	37.9129	23.0339	0.614035	0.44467	37.9129	31.8252	0.638686	0.651055	40.2962	68.1716	0.96154	0.80027	40.2962	46.8125	0.625	0.577932	33.1465	16.5372	0.6654	0.329161	33.1465	14.1481	0.486111	0.238006
26.9443	31.5009	0.60481	0.407157	26.9443	21.9374	0.656717	0.235472	27.7433	35.8923	0.884423	0.587272	27.7433	31.6931	0.457143	0.397801	27.7433	2.694	0.571429	0.0246676	27.7433	1.6042	0.464381	0.0220293	38.1296	23.2562	0.617544	0.448961	38.1296	27.8669	0.642336	0.570079	40.5264	81.9204	0.967033	0.961667	40.5264	50.6612	0.628571	0.625447	33.3359	17.4227	0.669202	0.346787	33.3359	12.1511	0.488889	0.204411
27.0974	34.9464	0.608247	0.451691	27.0974	25.9364	0.660448	0.278396	27.9009	41.6119	0.889447	0.680856	27.9009	25.9304	0.45974	0.325469	27.9009	3.138	0.574676	0.0287331	27.9009	1.1145	0.467019	0.0153046	38.3462	25.0349	0.621052	0.483299	38.3462	26.5206	0.645985	0.542538	40.7567	85.0406	0.972528	0.998295	40.7567	50.1306	0.632143	0.618896	33.5253	16.4513	0.673004	0.327452	33.5253	12.0533	0.491666	0.202766
27.2505	26.1044	0.611684	0.337406	27.2505	26.2063	0.66418	0.281293	28.0585	47.9666	0.894472	0.784832	28.0585	22.8571	0.462337	0.286894	28.0585	3	0.577922	0.0274695	28.0585	1.5422	0.469656	0.0211779	38.5629	14.6656	0.624562	0.28312	38.5629	30.6221	0.649636	0.626443	40.987	85.1858	0.978023	1	40.987	37.9367	0.635715	0.468354	33.7147	14.1966	0.676806	0.282573	33.7147	10.7296	0.494444	0.180498
27.4036	28.0137	0.61512	0.362084	27.4036	23.4872	0.667911	0.252107	28.2162	42.6548	0.899499	0.69792	28.2162	18.9821	0.464936	0.238257	28.2162	3.719	0.58117	0.034053	28.2162	4.0572	0.472296	0.0557145	38.7795	20.4438	0.62807	0.394668	38.7795	20.1199	0.653285	0.411597	41.2172	72.2654	0.983516	0.848327	41.2172	39.4497	0.639285	0.487033	33.9041	12.2978	0.680608	0.244779	33.9041	8.8713	0.497222	0.149237
27.5567	32.1909	0.618557	0.416076	27.5567	23.4542	0.671643	0.251753	28.3738	55.8393	0.904523	0.913646	28.3738	14.3748	0.467533	0.180427	28.3738	3.643	0.584416	0.0333571	28.3738	3.8942	0.474934	0.0534762	38.9962	17.6704	0.63158	0.341127	38.9962	30.0338	0.656935	0.614408	41.4475	69.7814	0.989012	0.819167	41.4475	38.4286	0.642857	0.474427	34.0935	12.4906	0.684411	0.248617	34.0935	7	0.499999	0.117757
27.7098	31.7884	0.621993	0.410873	27.7098	25.4391	0.675374	0.273058	28.5314	45.8698	0.909547	0.750524	28.5314	11.6893	0.470129	0.14672	28.5314	4.57	0.587662	0.0418452	28.5314	1.1517	0.477572	0.0158154	39.2128	17.7719	0.635088	0.343087	39.2128	36.6202	0.660584	0.749147	41.6778	63.4549	0.994507	0.7449	41.6778	44.1472	0.646429	0.545027	34.2829	14.3486	0.688213	0.285599	34.2829	6.4833	0.502777	0.109065
27.8629	32.1905	0.62543	0.41607	27.8629	24.0824	0.679106	0.258496	28.6891	51.4693	0.914574	0.842144	28.6891	7.2516	0.472728	0.0910195	28.6891	3.826	0.59091	0.0350328	28.6891	0.7104	0.480212	0.0097554	39.4295	17.3873	0.638597	0.335662	39.4295	39.9144	0.664235	0.816538	41.908	75	1	0.880428	41.908	38.8	0.649999	0.479012	34.4724	17.7807	0.692017	0.353912	34.4724	6.0615	0.505556	0.101969
28.016	29.6722	0.628866	0.383521	28.016	25.5597	0.682837	0.274353	28.8467	51.4743	0.919598	0.842226	28.8467	5.4813	0.475325	0.0687994	28.8467	3.154	0.594156	0.0288796	28.8467	1.2683	0.48285	0.0174166	39.6461	17.2953	0.642106	0.333886	39.6461	29.9438	0.667884	0.612567					42.1383	37.8661	0.653571	0.467483	34.6618	15.3539	0.695819	0.305609	34.6618	8.0467	0.508334	0.135365
28.1691	27.4826	0.632303	0.35522	28.1691	27.4959	0.686569	0.295136	29.0043	54.1899	0.924623	0.886658	29.0043	4.9702	0.477922	0.0623842	29.0043	2.345	0.597402	0.021472	29.0043	1.241	0.485488	0.0170417	39.8628	26.2621	0.645615	0.50699	39.8628	22.3383	0.671534	0.456979					42.3685	51.0163	0.657142	0.629831	34.8512	16.0312	0.699621	0.31909	34.8512	7.8489	0.511111	0.132038
28.3221	30.6238	0.635737	0.39582	28.3221	27.7235	0.690298	0.297579	29.162	47.109	0.92965	0.7708	29.162	5.8332	0.48052	0.0732163	29.162	4.372	0.60065	0.0400322	29.162	1.4256	0.488127	0.0195767	40.0794	24.9751	0.649123	0.482145	40.0794	23.5457	0.675183	0.48168					42.5988	50.5306	0.660714	0.623835	35.0406	17.4398	0.703423	0.347127	35.0406	5.75	0.513889	0.096729
28.4752	30.7917	0.639174	0.397991	28.4752	32.3876	0.69403	0.347642	29.3196	47.0389	0.934674	0.769653	29.3196	8.7155	0.483117	0.109394	29.3196	3.805	0.603897	0.0348405	29.3196	1.8604	0.490765	0.0255475	40.296	24.728	0.652631	0.477375	40.296	20.6112	0.678832	0.421648					42.8291	42.5592	0.664286	0.525422	35.23	17.471	0.707225	0.347748	35.23	5.9067	0.516667	0.0993651
28.6283	32.5881	0.642611	0.42121	28.6283	27.3085	0.697761	0.293124	29.4772	45.5671	0.939698	0.745572	29.4772	6.142	0.485714	0.0770922	29.4772	5.51	0.607143	0.0504523	29.4772	2.6107	0.493403	0.0358508	40.5127	25.5729	0.656141	0.493685	40.5127	33.1533	0.682482	0.678224					43.0593	44.0151	0.667856	0.543396	35.4194	25.9764	0.711027	0.517042	35.4194	4.5359	0.519444	0.0763049
28.7814	35.5133	0.646047	0.459019	28.7814	28.986	0.701493	0.31113	29.6349	47.7438	0.944725	0.781187	29.6349	6.66	0.488312	0.083594	29.6349	6	0.610391	0.054939	29.6349	3.3125	0.496043	0.0454881	40.7293	24.8242	0.659649	0.479232	40.7293	36.0956	0.686131	0.738416					43.2896	38.5102	0.671428	0.475435	35.6088	20.2678	0.714829	0.403416	35.6088	1.3822	0.522222	0.023252
28.9345	33.1643	0.649484	0.428657	28.9345	28.0672	0.705224	0.301268	29.7925	52.8869	0.949749	0.865339	29.7925	8.3726	0.490909	0.10509	29.7925	5.702	0.613637	0.0522104	29.7925	2.4329	0.498681	0.0334092	40.946	24.3391	0.663159	0.469867	40.946	28.5196	0.689782	0.583432					43.5199	42.5125	0.675	0.524846	35.7982	19.9325	0.718632	0.396742	35.7982	3.995	0.525	0.0672057
29.0876	32.706	0.65292	0.422733	29.0876	28.622	0.708956	0.307223	29.9501	61.117	0.954774	1	29.9501	8.7227	0.493506	0.109484	29.9501	9.347	0.616883	0.0855858	29.9501	1.9765	0.501319	0.0271418	41.1626	18.8889	0.666667	0.364651	41.1626	22.644	0.693431	0.463233					43.7501	43.3214	0.678571	0.534832	35.9876	19.1712	0.722434	0.381589	35.9876	7.3889	0.527777	0.124299
29.2407	30.2062	0.656357	0.390423	29.2407	26.2984	0.712687	0.282282	30.1077	57.0292	0.959798	0.933115	30.1077	10.5906	0.496103	0.13293	30.1077	8.766	0.620129	0.0802659	30.1077	1.8793	0.503957	0.025807	41.3793	21.5748	0.670176	0.416502	41.3793	23.2672	0.697081	0.475982					43.9804	37.4431	0.682143	0.46226	36.177	22.011	0.726236	0.438114	36.177	12.6913	0.530555	0.213499
29.3938	29.8069	0.659793	0.385262	29.3938	28.646	0.716419	0.307481	30.2654	46.9362	0.964825	0.767973	30.2654	9.0855	0.498702	0.114038	30.2654	8.622	0.623377	0.0789474	30.2654	0.7177	0.506597	0.00985565	41.5959	20.9756	0.673684	0.404934	41.5959	17.6083	0.70073	0.360217					44.2107	37.3102	0.685715	0.46062	36.3664	19.6626	0.730038	0.39137	36.3664	18.32	0.533333	0.308187
29.5469	34.6937	0.66323	0.448425	29.5469	30.847	0.72015	0.331106	30.423	49.0505	0.969849	0.802567	30.423	10.5874	0.501298	0.132889	30.423	10.103	0.626623	0.0925081	30.423	0.1505	0.509235	0.00206671	41.8126	19.2119	0.677194	0.370886	41.8126	24.2339	0.704381	0.495758					44.4409	41.9459	0.689285	0.517851	36.5558	17.4672	0.73384	0.347672	36.5558	19.2715	0.53611	0.324194
29.7	38.2222	0.666667	0.494032	29.7	31.9666	0.723882	0.343123	30.5806	52.7713	0.974873	0.863447	30.5806	9.0718	0.503895	0.113866	30.5806	12.526	0.629869	0.114694	30.5806	0.6053	0.511873	0.00831214	42.0292	20.0243	0.680702	0.386569	42.0292	22.8364	0.70803	0.467169					44.6712	43.1969	0.692857	0.533295	36.7453	19.4225	0.737644	0.386591	36.7453	11.9481	0.538889	0.200996
29.8531	35.2246	0.670103	0.455287	29.8531	28.4208	0.727613	0.305063	30.7383	58.6895	0.9799	0.960281	30.7383	7.3812	0.506494	0.0926462	30.7383	10.976	0.633118	0.100502	30.7383	1.7822	0.514512	0.0244736	42.2459	17.2604	0.684212	0.333212	42.2459	28.1152	0.71168	0.575159					44.9015	41.9554	0.696429	0.517968	36.9347	22.1479	0.741446	0.440838	36.9347	14.1667	0.541667	0.238318
30.0062	32.2587	0.67354	0.416952	30.0062	29.9087	0.731345	0.321034	30.8959	58.0068	0.984925	0.949111	30.8959	4.9213	0.509091	0.0617704	30.8959	11.868	0.636364	0.108669	30.8959	1.7976	0.51715	0.0246851	42.4625	17.9565	0.68772	0.346651	42.4625	22.2962	0.715329	0.456118					45.1317	37.6	0.7	0.464198	37.1241	21.7649	0.745248	0.433215	37.1241	14.9911	0.544445	0.252187
30.1593	37.0296	0.676976	0.478617	30.1593	33.4933	0.735076	0.359511	31.0535	51.4914	0.989949	0.842505	31.0535	4.6346	0.511688	0.0581719	31.0535	16.653	0.63961	0.152483	31.0535	2.4512	0.519788	0.0336605	42.6791	19.4395	0.691228	0.37528	42.6791	19.3101	0.718978	0.395031					45.362	33.5885	0.703572	0.414673	37.3135	19.4279	0.74905	0.386699	37.3135	10.805	0.547222	0.181766
30.3124	30.9615	0.680413	0.400185	30.3124	33.1887	0.738808	0.356241	31.2112	45.3112	0.994976	0.741385	31.2112	4.8139	0.514286	0.0604224	31.2112	18.163	0.642858	0.16631	31.2112	3.5646	0.522428	0.04895	42.8958	13.697	0.694737	0.264421	42.8958	26.9757	0.722628	0.551848					45.5922	40.4949	0.707142	0.499937	37.5029	14.1819	0.752853	0.282281	37.5029	9.22	0.55	0.155103
30.4654	27.7909	0.683847	0.359205	30.4654	31.7023	0.742537	0.340286	31.3688	24	1	0.392689	31.3688	8.6544	0.516883	0.108627	31.3688	19.428	0.646104	0.177893	31.3688	3.3958	0.525066	0.046632	43.1124	13.2023	0.698245	0.254871	43.1124	23.3024	0.726277	0.476702					45.8225	46.0005	0.710714	0.567907	37.6923	19.7105	0.756655	0.392324	37.6923	5.4785	0.552778	0.0921618
30.6185	25.6637	0.687284	0.33171	30.6185	33.0809	0.746268	0.355084					31.5264	9.2591	0.51948	0.116217	31.5264	17.168	0.64935	0.157199	31.5264	2.5939	0.527704	0.0356201	43.3291	23.0326	0.701755	0.444645	43.3291	27.3064	0.729928	0.558613					46.0528	43.2449	0.714286	0.533888	37.8817	24.4862	0.760457	0.487381	37.8817	10.1852	0.555555	0.17134
30.7716	26.8286	0.690721	0.346767	30.7716	35.5	0.75	0.38105					31.6841	7.0428	0.522078	0.0883988	31.6841	17.006	0.652598	0.155715	31.6841	1.515	0.530344	0.0208044	43.5457	25.9584	0.705263	0.501127	43.5457	20.3848	0.733577	0.417016					46.283	45.1788	0.717856	0.557763	38.0711	18.5565	0.764259	0.369354	38.0711	9.165	0.558333	0.154178
30.9247	27.7179	0.694157	0.358261	30.9247	34.4894	0.753732	0.370203					31.8417	7.6637	0.524675	0.0961921	31.8417	17.885	0.655844	0.163764	31.8417	1.4707	0.532981	0.020196	43.7624	12.7847	0.708773	0.246809	43.7624	15.5049	0.737227	0.317187					46.5133	53.5429	0.721428	0.661023	38.2605	22.4436	0.768061	0.446724	38.2605	9.6852	0.561111	0.162929
31.0778	25.7932	0.697594	0.333384	31.0778	35.0466	0.757463	0.376183					31.9993	6.8076	0.527272	0.0854466	31.9993	16.124	0.65909	0.147639	31.9993	2.1849	0.535619	0.0300036	43.979	14.4424	0.712281	0.278811	43.979	22.2812	0.740876	0.455811					46.7436	40.6375	0.725	0.501698	38.4499	16.888	0.771863	0.336144	38.4499	10.2591	0.563888	0.172583
31.2309	27.3567	0.70103	0.353592	31.2309	34.0668	0.761195	0.365666					32.157	12.1863	0.529871	0.152958	32.157	11.329	0.662339	0.103734	32.157	3.3588	0.538259	0.0461239	44.1957	16.2609	0.715791	0.313917	44.1957	24.9166	0.744527	0.509724					46.9738	42.2286	0.728571	0.521341	38.6393	23.2977	0.775665	0.463724	38.6393	18.6	0.566666	0.312897
31.384	26.8869	0.704467	0.34752	31.384	29.3676	0.764926	0.315226					32.3146	14.4685	0.532467	0.181604	32.3146	11.215	0.665585	0.10269	32.3146	4.0931	0.540897	0.0562075	44.4123	5.0893	0.719299	0.098249	44.4123	25.0438	0.748176	0.512326					47.2041	47.1276	0.732143	0.581822	38.8288	20.6471	0.779469	0.410966	38.8288	35.1759	0.569445	0.591745
31.5371	27.8238	0.707903	0.35963	31.5371	33.2306	0.768658	0.356691					32.4722	9.0641	0.535064	0.113769	32.4722	11.866	0.668831	0.108651	32.4722	5.4513	0.543535	0.0748587	44.629	9.0252	0.722808	0.174232	44.629	19.9562	0.751826	0.408248					47.4344	40.1153	0.735715	0.495251	39.0182	20.5565	0.783272	0.409163	39.0182	33.697	0.572223	0.566866
31.6902	30.326	0.71134	0.391971	31.6902	33.4028	0.772389	0.358539					32.6299	9.9818	0.537663	0.125288	32.6299	8.104	0.672079	0.0742043	32.6299	9.9552	0.546175	0.136707	44.8456	5.9634	0.726316	0.115124	44.8456	30.0564	0.755475	0.61487					47.6646	41.5357	0.739285	0.512786	39.2076	25.1708	0.787074	0.501007	39.2076	27.855	0.575	0.468589
31.8433	31.7253	0.714777	0.410058	31.8433	33.926	0.776121	0.364155					32.7875	9.6128	0.54026	0.120657	32.7875	10.665	0.675325	0.0976541	32.7875	13.9462	0.548813	0.191513	45.0622	4.9235	0.729824	0.0950483	45.0622	32.0632	0.759124	0.655924					47.8949	40.751	0.742857	0.503099	39.397	21.6331	0.790876	0.430592	39.397	18.0444	0.577778	0.303551
31.9964	29.6232	0.718213	0.382887	31.9964	31.8202	0.779852	0.341552					32.9451	7.2514	0.542857	0.091017	32.9451	12.449	0.678571	0.113989	32.9451	18.4853	0.551451	0.253845	45.2789	8.2667	0.733334	0.159589	45.2789	12.7953	0.762774	0.261756					48.1251	41.377	0.746428	0.510827	39.5864	20.8754	0.794678	0.41551	39.5864	17.6587	0.580556	0.297062
32.1495	32.1237	0.72165	0.415207	32.1495	35.2687	0.783584	0.378567					33.1028	7.2975	0.545455	0.0915957	33.1028	10.273	0.681819	0.0940648	33.1028	20.3332	0.55409	0.279221	45.4955	8.5706	0.736842	0.165456	45.4955	23.5634	0.766423	0.482042					48.3554	41.25	0.75	0.509259	39.7758	19.399	0.79848	0.386124	39.7758	17.3333	0.583333	0.291588
32.3026	40.1786	0.725086	0.519319	32.3026	32.5864	0.787315	0.349776					33.2604	6.574	0.548052	0.0825145	33.2604	10.391	0.685065	0.0951452	33.2604	16.9451	0.556728	0.232695	45.7122	6.0659	0.740352	0.117102	45.7122	25.5154	0.770074	0.521974					48.5857	43.7893	0.753572	0.540609	39.9652	23.1698	0.802282	0.461179	39.9652	16.522	0.586111	0.27794
32.4557	38.7619	0.728523	0.501008	32.4557	31.816	0.791047	0.341507					33.418	4.8958	0.550649	0.0614504	33.418	11.884	0.688311	0.108816	33.418	18.671	0.559366	0.256395	45.9288	10.4246	0.74386	0.201247	45.9288	27.812	0.773723	0.568956					48.8159	35.0571	0.757142	0.432804	40.1546	21.0645	0.806084	0.419274	40.1546	19.1496	0.588889	0.322143
32.6087	45.4552	0.731957	0.58752	32.6087	35.9552	0.794776	0.385936					33.5757	5.9696	0.553247	0.0749283	33.5757	13.974	0.69156	0.127953	33.5757	19.3514	0.562006	0.265739	46.1455	9.9551	0.747369	0.192183	46.1455	20.8607	0.777373	0.426752					49.0462	51.7832	0.760714	0.639299	40.344	17.8042	0.809886	0.35438	40.344	21.05	0.591666	0.354112
32.7618	39.1263	0.735394	0.505717	32.7618	44.0786	0.798507	0.473131					33.7333	6.0794	0.555844	0.0763065	33.7333	18.43	0.694806	0.168754	33.7333	16.5161	0.564644	0.226803	46.3621	12.6832	0.750877	0.244849	46.3621	30.2187	0.781022	0.618191					49.2765	51.4551	0.764286	0.635248	40.5334	24.6332	0.813688	0.490307	40.5334	21.4585	0.594444	0.360984
32.9149	36.9498	0.738831	0.477586	32.9149	39.5136	0.802239	0.424131					33.8909	5.9273	0.558441	0.0743974	33.8909	22.189	0.698052	0.203174	33.8909	21.6436	0.567282	0.297216	46.5788	18.3789	0.754387	0.354805	46.5788	24.2155	0.784673	0.495382					49.5067	51.9503	0.767856	0.641362	40.7228	23.8587	0.817491	0.474891	40.7228	16.5324	0.597221	0.278115
33.068	35.982	0.742267	0.465077	33.068	46.0757	0.80597	0.494568					34.0486	2.668	0.56104	0.0334878	34.0486	21.406	0.7013	0.196004	34.0486	20.0908	0.569922	0.275892	46.7954	24.528	0.757895	0.473514	46.7954	19.3584	0.788322	0.396019					49.737	53.2816	0.771428	0.657798	40.9122	21.9546	0.821293	0.436991	40.9122	17.76	0.599999	0.298767
33.2211	41.4785	0.745704	0.53612	33.2211	41.2182	0.809702	0.442428					34.2062	3.7845	0.563637	0.0475017	34.2062	24.554	0.704546	0.224829	34.2062	12.6875	0.57256	0.174228	47.0121	24.7626	0.761405	0.478042	47.0121	25.8348	0.791972	0.528508					49.9673	52.825	0.775	0.65216	41.1017	22.2295	0.825097	0.442463	41.1017	10.7919	0.602778	0.181546
33.3742	36.1913	0.74914	0.467782	33.3742	31.6086	0.813433	0.339281					34.3638	3.6779	0.566233	0.0461637	34.3638	23.744	0.707792	0.217412	34.3638	15.1168	0.575198	0.207588	47.2287	26.9122	0.764913	0.519541	47.2287	23.8873	0.795621	0.488668					50.1975	46.1694	0.778571	0.569993	41.2911	21.9999	0.828899	0.437893	41.2911	7.3896	0.605556	0.124311
33.5273	33.0762	0.752577	0.427518	33.5273	30.4841	0.817165	0.32721					34.5215	4.0736	0.568832	0.0511304	34.5215	24.706	0.71104	0.226221	34.5215	15.4479	0.577837	0.212135	47.4453	31.1119	0.768421	0.600616	47.4453	25.174	0.79927	0.51499					50.4278	43.4847	0.782143	0.536848	41.4805	13.1896	0.832701	0.26253	41.4805	3.985	0.608334	0.0670374
33.6804	27.3262	0.756013	0.353198	33.6804	34.0682	0.820897	0.365681					34.6791	4.551	0.571429	0.0571226	34.6791	21.224	0.714286	0.194338	34.6791	17.8594	0.580475	0.24525	47.662	29.0037	0.771931	0.559917	47.662	13.3478	0.80292	0.273059					50.658	32.2653	0.785713	0.398337	41.6699	17.0056	0.836503	0.338485	41.6699	3.6296	0.611111	0.0610587
33.8335	30.5166	0.75945	0.394435	33.8335	35.7147	0.824628	0.383355					34.8367	3.4965	0.574026	0.0438868	34.8367	21.036	0.717532	0.192616	34.8367	19.3333	0.583113	0.26549	47.8786	25.5532	0.775439	0.493305	47.8786	8.2099	0.806569	0.167952					50.8883	32.4071	0.789285	0.400088	41.8593	18.3954	0.840305	0.366148	41.8593	6.6191	0.613889	0.111349
33.9866	35.312	0.762887	0.456417	33.9866	37.0492	0.82836	0.397679					34.9943	3.8494	0.576623	0.0483163	34.9943	16.271	0.720778	0.148985	34.9943	14.9064	0.585751	0.204699	48.0953	27.333	0.778948	0.527664	48.0953	2.4464	0.81022	0.0500465					51.1186	36.4827	0.792857	0.450404	42.0487	19.4278	0.844107	0.386697	42.0487	4.9467	0.616666	0.0832156
34.1397	38.6145	0.766323	0.499102	34.1397	39.7708	0.832091	0.426892					35.152	2.7455	0.579221	0.0344606	35.152	16.74	0.724027	0.15328	35.152	15.9243	0.588391	0.218677	48.3119	33.4992	0.782456	0.646703	48.3119	4.4182	0.813869	0.0903841					51.3488	44.1556	0.796428	0.545131	42.2381	19.3642	0.847909	0.385431	42.2381	4.1709	0.619444	0.0701647
34.2928	36.942	0.76976	0.477485	34.2928	36.3145	0.835823	0.389793					35.3096	2.4909	0.581818	0.0312649	35.3096	20.314	0.727273	0.186005	35.3096	18.0133	0.591029	0.247363	48.5286	34.8611	0.785966	0.672994	48.5286	2.1952	0.817519	0.0449077					51.5791	38.6	0.8	0.476543	42.4275	15.4841	0.851712	0.3082	42.4275	4.7333	0.622222	0.0796257
34.4459	35.1541	0.773196	0.454376	34.4459	42.4333	0.839554	0.455471					35.4672	1.6623	0.584415	0.0208646	35.4672	25.842	0.730519	0.236622	35.4672	21.991	0.593667	0.301986	48.7452	27.8144	0.789474	0.536958	48.7452	4.0448	0.821168	0.0827454					51.8094	39.2806	0.803572	0.484946	42.6169	14.2265	0.855514	0.283169	42.6169	5.5	0.624999	0.0925234
34.5989	37.2323	0.776631	0.481237	34.5989	53.5525	0.843283	0.574822					35.6249	3.0123	0.587013	0.0378093	35.6249	22.455	0.733767	0.205609	35.6249	21.934	0.596306	0.301203	48.9619	28.5205	0.792984	0.550589	48.9619	6.5784	0.824819	0.134576					52.0396	37.4153	0.807142	0.461917	42.8063	14.3368	0.859316	0.285364	42.8063	6.2052	0.627777	0.104387
34.752	39.0537	0.780067	0.504779	34.752	45.326	0.847015	0.48652					35.7825	2.2701	0.58961	0.0284935	35.7825	27.912	0.737013	0.255576	35.7825	19.3967	0.598944	0.266361	49.1785	18.6137	0.796492	0.359338	49.1785	6.4104	0.828468	0.131139					52.2699	35.6839	0.810714	0.440542	42.9957	16.894	0.863118	0.336263	42.9957	7.0124	0.630555	0.117966
34.9051	35.18	0.783504	0.454711	34.9051	37.6801	0.850746	0.404451					35.9401	2.9996	0.592207	0.0376499	35.9401	24.818	0.740259	0.227246	35.9401	16.3902	0.601582	0.225075	49.3952	13.8	0.800001	0.266409	49.3952	12.8922	0.832118	0.263739					52.5002	45.6	0.814286	0.562963	43.1851	21.0336	0.86692	0.418659	43.1851	5.92	0.633332	0.0995889
35.0582	36.0936	0.786941	0.466519	35.0582	37.892	0.854478	0.406725					36.0978	2.3833	0.594806	0.0299143	36.0978	19.352	0.743507	0.177197	36.0978	16.6934	0.604222	0.229238	49.6118	18.8516	0.803509	0.363931	49.6118	7.7492	0.835767	0.158527					52.7304	48.6166	0.817857	0.600205	43.3746	28.4988	0.870724	0.567249	43.3746	4.6907	0.636112	0.078909
35.2113	40.1208	0.790377	0.518572	35.2113	41.1464	0.858209	0.441657					36.2554	1.7234	0.597402	0.0216315	36.2554	21.942	0.746753	0.200912	36.2554	12.5251	0.60686	0.171998	49.8284	17.4266	0.807017	0.336421	49.8284	10.1062	0.839416	0.206745					52.9607	49.9694	0.821429	0.616906	43.564	24.1944	0.874526	0.481573	43.564	5.4074	0.638889	0.0909657
35.3644	37.6304	0.793814	0.486383	35.3644	37.9972	0.861941	0.407855					36.413	2.88	0.599999	0.0361488	36.413	25	0.749999	0.228913	36.413	11.682	0.609498	0.16042	50.0451	23.4565	0.810527	0.452828	50.0451	15.6183	0.843066	0.319507					53.1909	42.55	0.824999	0.525309	43.7534	21.0779	0.878328	0.419541	43.7534	8.9017	0.641667	0.149748
35.5175	39.5436	0.79725	0.511111	35.5175	41.6572	0.865672	0.44714					36.5707	4.1992	0.602598	0.0527069	36.5707	23.98	0.753248	0.219573	36.5707	14.5066	0.612138	0.199208	50.2617	29.4008	0.814035	0.567583	50.2617	14.1968	0.846715	0.290427					53.4212	47.9796	0.828571	0.592341	43.9428	14.4249	0.88213	0.287118	43.9428	11.7793	0.644444	0.198157
35.6706	42.4601	0.800687	0.548808	35.6706	41.8364	0.869404	0.449064					36.7283	3.3351	0.605195	0.041861	36.7283	28.687	0.756494	0.262673	36.7283	18.4189	0.614776	0.252933	50.4784	30.3129	0.817545	0.585191	50.4784	15.196	0.850366	0.310868					53.6515	51.95	0.832143	0.641358	44.1322	20.9024	0.885933	0.416048	44.1322	12.8967	0.647222	0.216954
35.8237	39.7878	0.804123	0.514268	35.8237	42.7289	0.873135	0.458644					36.8859	4.8549	0.607792	0.060937	36.8859	24.285	0.75974	0.222366	36.8859	22.8401	0.617414	0.313646	50.695	25.8011	0.821053	0.498091	50.695	15.9112	0.854015	0.325499					53.8817	50.2133	0.835713	0.619917	44.3216	30.2971	0.889735	0.603043	44.3216	9.24	0.65	0.155439
35.9768	40.7214	0.80756	0.526335	35.9768	52.2144	0.876867	0.560459					37.0436	5.2712	0.61039	0.0661623	37.0436	24.438	0.762988	0.223767	37.0436	22.5784	0.620053	0.310053	50.9117	21.4654	0.824562	0.41439	50.9117	23.7532	0.857665	0.485924					54.112	40.8023	0.839285	0.503732	44.511	27.3558	0.893537	0.544498	44.511	11.6991	0.652777	0.196807
36.1299	41.0858	0.810997	0.531045	36.1299	59.4772	0.880599	0.638417					37.2012	5	0.612987	0.0627583	37.2012	23.441	0.766234	0.214638	37.2012	19.4684	0.622691	0.267345	51.1283	17.8761	0.82807	0.345098	51.1283	21.4656	0.861314	0.439126					54.3423	44.1224	0.842857	0.544721	44.7004	33.9983	0.897339	0.676712	44.7004	15.8696	0.655555	0.266965
36.283	38.7021	0.814433	0.500235	36.283	53.3168	0.88433	0.572292					37.3588	5.2009	0.615584	0.0652799	37.3588	23.945	0.76948	0.219252	37.3588	17.6385	0.625329	0.242217	51.345	18.087	0.83158	0.34917	51.345	18.4745	0.864965	0.377937					54.5725	48.2094	0.846428	0.595178	44.8898	35.6292	0.901141	0.709174	44.8898	13.0117	0.658333	0.218889
36.4361	38.0192	0.81787	0.491408	36.4361	56.0711	0.888062	0.601856					37.5165	7.5755	0.618182	0.095085	37.5165	24.058	0.772728	0.220287	37.5165	19.2104	0.627969	0.263802	51.5616	8.2277	0.835088	0.158836	51.5616	22.1752	0.868614	0.453643					54.8028	47.55	0.85	0.587037	45.0792	33.9958	0.904943	0.676663	45.0792	12.2407	0.66111	0.205918
36.5892	35.7914	0.821306	0.462613	36.5892	55.4344	0.891793	0.595022					37.6741	16.6556	0.620779	0.209055	37.6741	26.079	0.775974	0.238792	37.6741	26.0516	0.630607	0.357747	51.7783	4.1138	0.838598	0.079417	51.7783	22.9531	0.872264	0.469557					55.0331	46.4469	0.853572	0.573419	45.2686	29.6821	0.908745	0.590801	45.2686	12.9619	0.663888	0.218051
36.7422	37.8052	0.824741	0.488642	36.7422	51.0561	0.895522	0.548026					37.8317	14.7413	0.623376	0.185028	37.8317	24.555	0.77922	0.224838	37.8317	30.0526	0.633245	0.41269	51.9949	6.1579	0.842106	0.118878	51.9949	26.7505	0.875913	0.547241					55.2633	53.0816	0.857142	0.655328	45.458	30.8092	0.912547	0.613236	45.458	13.6667	0.666666	0.229907
36.8953	38.7215	0.828177	0.500485	36.8953	49.9009	0.899254	0.535627					37.9894	20.6795	0.625975	0.259562	37.9894	26.814	0.782469	0.245522	37.9894	27.6442	0.635885	0.379617	52.2115	7.8055	0.845614	0.150685	52.2115	36.1882	0.879562	0.74031					55.4936	52.5482	0.860714	0.648743	45.6475	30.2411	0.916351	0.601928	45.6475	13.2802	0.669445	0.223405
37.0484	44.3032	0.831614	0.57263	37.0484	48.789	0.902985	0.523692					38.147	27.3894	0.628572	0.343782	38.147	22.061	0.785715	0.202002	38.147	25.7004	0.638523	0.352925	52.4282	5.8915	0.849124	0.113736	52.4282	30.9007	0.883212	0.632142					55.7239	46.0061	0.864286	0.567977	45.8369	30.3478	0.920154	0.604052	45.8369	13.883	0.672222	0.233546
37.2015	37.1237	0.835051	0.479833	37.2015	46.5397	0.906717	0.499548					38.3046	21.6372	0.631168	0.271583	38.3046	24.969	0.788961	0.228629	38.3046	22.4547	0.641161	0.308354	52.6448	6.4776	0.852632	0.12505	52.6448	32.5197	0.886861	0.665263					55.9541	56.498	0.867857	0.697506	46.0263	28.2135	0.923956	0.56157	46.0263	17.745	0.675	0.298514
37.3546	33.7438	0.838487	0.436147	37.3546	41.4025	0.910448	0.444406					38.4623	29.1118	0.633767	0.365401	38.4623	28.582	0.792209	0.261711	38.4623	22.2635	0.6438	0.305728	52.8615	6.3847	0.856141	0.123257	52.8615	28.3939	0.890512	0.58086					56.1844	56.098	0.871429	0.692568	46.2157	29.469	0.927758	0.58656	46.2157	13.0341	0.677778	0.219265
37.5077	37.5727	0.841924	0.485637	37.5077	46.5853	0.91418	0.500038					38.6199	28.5041	0.636364	0.357773	38.6199	26.636	0.795455	0.243893	38.6199	20.0463	0.646438	0.275281	53.0781	7.1677	0.859649	0.138373	53.0781	20.6159	0.894161	0.421744					56.4146	50.25	0.874999	0.62037	46.4051	28.7166	0.93156	0.571584	46.4051	13.6528	0.680555	0.229673
37.6608	38.0742	0.84536	0.492119	37.6608	64.8902	0.917911	0.696519					38.7775	30.3701	0.638961	0.381195	38.7775	27.392	0.798701	0.250815	38.7775	20.6232	0.649076	0.283203	53.2948	20.2377	0.863159	0.390689	53.2948	35.8336	0.897811	0.733056					56.6449	50.5449	0.878571	0.624011	46.5945	32.4326	0.935362	0.645548	46.5945	15.2867	0.683333	0.25716
37.8139	39.3236	0.848797	0.508268	37.8139	71.0101	0.921643	0.762209					38.9352	23.0407	0.641559	0.289199	38.9352	26.688	0.801949	0.244369	38.9352	16.8481	0.651716	0.231363	53.5114	13.3556	0.866667	0.25783	53.5114	33.7932	0.90146	0.691315					56.8752	43.2526	0.882143	0.533983	46.7839	30.5313	0.939164	0.607704	46.7839	15.5565	0.686111	0.261698
37.967	39.3085	0.852233	0.508072	37.967	59.9982	0.925374	0.644009					39.0928	29.6297	0.644156	0.371902	39.0928	23.788	0.805195	0.217815	39.0928	24.4855	0.654354	0.336241	53.7281	15.7439	0.870177	0.303936	53.7281	13.8259	0.905111	0.282839					57.1054	41.9306	0.885713	0.517662	46.9733	29.6155	0.942966	0.589476	46.9733	16.7778	0.688888	0.282244
38.1201	38.8877	0.85567	0.502634	38.1201	65.8066	0.929106	0.706355					39.2504	28.9481	0.646753	0.363346	39.2504	19.321	0.808441	0.176913	39.2504	25.4294	0.656992	0.349203	53.9447	18.6604	0.873685	0.360239	53.9447	19.7012	0.90876	0.403032					57.3357	36.6559	0.889285	0.452542	47.1627	33.2328	0.946768	0.661476	47.1627	15.9183	0.691666	0.267785
38.2732	33.3398	0.859107	0.430925	38.2732	56.2101	0.932837	0.603348					39.408	30.9155	0.64935	0.388041	39.408	25.228	0.811688	0.231	39.408	24.6109	0.65963	0.337963	54.1614	22.189	0.877194	0.428359	54.1614	25.9288	0.91241	0.530431					57.566	42.9541	0.892857	0.530298	47.3521	32.4578	0.950571	0.64605	47.3521	11.1852	0.694444	0.188162
38.4263	38.9202	0.862543	0.503054	38.4263	55.4766	0.936569	0.595475					39.5657	22.252	0.651948	0.279299	39.5657	29.455	0.814936	0.269705	39.5657	29.872	0.662269	0.41021	54.378	24.4646	0.880702	0.47229	54.378	24.0127	0.916059	0.491233					57.7962	38.9452	0.896428	0.480805	47.5415	34.1846	0.954373	0.680421	47.5415	6.3693	0.697221	0.107147
38.5794	40.9409	0.86598	0.529172	38.5794	50.2185	0.9403	0.539036					39.7233	21.3355	0.654545	0.267796	39.7233	27.81	0.818182	0.254642	39.7233	34.0895	0.664907	0.468126	54.5946	17.5008	0.88421	0.337853	54.5946	26.139	0.919708	0.534731					58.0265	38.2	0.9	0.471605	47.7309	42.1065	0.958175	0.8381	47.7309	4.28	0.699999	0.0720001
38.7325	38.8197	0.869416	0.501755	38.7325	53.7386	0.944032	0.57682					39.8809	23.3918	0.657142	0.293606	39.8809	29.755	0.821428	0.272452	39.8809	38.2202	0.667545	0.52485	54.8113	26.5103	0.88772	0.511782	54.8113	31.5095	0.923359	0.644597					58.2568	54.6189	0.903572	0.674307	47.9204	39.5164	0.961979	0.786546	47.9204	7.5867	0.702778	0.127627
38.8855	37.1485	0.872851	0.480154	38.8855	59.4319	0.947761	0.63793					40.0386	22.7524	0.659741	0.28558	40.0386	22.802	0.824676	0.208787	40.0386	32.2774	0.670185	0.443242	55.0279	32.4211	0.891228	0.62589	55.0279	27.0879	0.927007	0.554143					58.487	58.4837	0.907142	0.722021	48.1098	39.7932	0.965781	0.792056	48.1098	13.3681	0.705556	0.224884
39.0386	39.0355	0.876287	0.504544	39.0386	66.7478	0.951493	0.716458					40.1962	17.3336	0.662337	0.217565	40.1962	23.237	0.827922	0.21277	40.1962	30.3452	0.672823	0.416708	55.2446	24.1413	0.894738	0.466048	55.2446	26.7429	0.930658	0.547085					58.7173	57.7207	0.910714	0.712601	48.2992	39.2079	0.969583	0.780406	48.2992	15.8333	0.708333	0.266355
39.1917	47.4278	0.879724	0.613017	39.1917	67.3907	0.955224	0.723359					40.3538	13.8459	0.664934	0.173789	40.3538	28.969	0.831168	0.265255	40.3538	28.6025	0.675461	0.392777	55.4612	28.8094	0.898246	0.556166	55.4612	29.8591	0.934307	0.610834					58.9475	46.7102	0.914285	0.576669	48.4886	36.4795	0.973385	0.726099	48.4886	12.4252	0.711111	0.209022
39.3448	49.0491	0.88316	0.633972	39.3448	68.9824	0.958956	0.740444					40.5115	12.4806	0.667533	0.156652	40.5115	27.985	0.834416	0.256245	40.5115	18.1697	0.678101	0.249511	55.6779	25.199	0.901755	0.486467	55.6779	28.0584	0.937957	0.573997					59.1778	42.8753	0.917857	0.529325	48.678	46.7849	0.977187	0.931221	48.678	16.3702	0.713889	0.275387
39.4979	39.9638	0.886597	0.516542	39.4979	70.8654	0.962687	0.760655					40.6691	6.9654	0.67013	0.0874273	40.6691	28.984	0.837662	0.265392	40.6691	21.8204	0.680739	0.299644	55.8945	29.8199	0.905264	0.575674	55.8945	30.7519	0.941606	0.629098					59.4081	46.7071	0.921429	0.576631	48.8674	50.2404	0.980989	1	48.8674	15.5267	0.716666	0.261197
39.651	41.9238	0.890034	0.541876	39.651	74.8924	0.966419	0.80388					40.8267	5.4585	0.672727	0.0685132	40.8267	25.339	0.840909	0.232017	40.8267	25.109	0.683377	0.344803	56.1112	37.0175	0.908773	0.714624	56.1112	42.6895	0.945257	0.873308					59.6383	54.2125	0.924999	0.66929	49.0568	40.1457	0.984792	0.799072	49.0568	10.1293	0.719444	0.1704
39.8041	41.8604	0.89347	0.541056	39.8041	77.1412	0.97015	0.828019					40.9844	3.0801	0.675325	0.0386603	40.9844	29.256	0.844157	0.267883	40.9844	24.7293	0.686016	0.339589	56.3278	13.795	0.912281	0.266313	56.3278	37.3408	0.948906	0.763889					59.8686	57.2245	0.928571	0.706475	49.2462	33.9286	0.988594	0.675325	49.2462	11.2222	0.722222	0.188785
39.9572	43.5904	0.896907	0.563417	39.9572	82.126	0.973882	0.881525					41.142	3.4682	0.677922	0.0435316	41.142	26.866	0.847403	0.245999	41.142	27.5311	0.688654	0.378064	56.5445	30.3202	0.915791	0.585332	56.5445	35.5292	0.952556	0.726829					60.0989	55.7107	0.932143	0.687786	49.4356	26.7489	0.992396	0.532418	49.4356	13.125	0.724999	0.220795
40.1103	42.1997	0.900343	0.545442	40.1103	92.1842	0.977613	0.989487					41.2996	2.4277	0.680519	0.0304716	41.2996	33.571	0.850649	0.307393	41.2996	25.7863	0.691292	0.354104	56.7611	31.8354	0.919299	0.614583	56.7611	22.4442	0.956205	0.459146					60.3291	58.9714	0.935714	0.728042	49.625	27.0131	0.996198	0.537677	49.625	12.3815	0.727777	0.208287
40.2634	37.3844	0.90378	0.483203	40.2634	93.1636	0.981345	1					41.4573	3.0214	0.683117	0.0379236	41.4573	27.523	0.853897	0.252014	41.4573	31.0584	0.693932	0.426502	56.9777	20.9452	0.922807	0.404347	56.9777	21.5422	0.959854	0.440693					60.5594	60.6367	0.939286	0.748601	49.8144	28	1	0.55732	49.8144	13.988	0.730555	0.235312
40.4165	37.1316	0.907217	0.479935	40.4165	87.6879	0.985076	0.941225					41.6149	3.7739	0.685714	0.0473687	41.6149	25.388	0.857143	0.232465	41.6149	30.0469	0.69657	0.412612	57.1944	21.4787	0.926317	0.414647	57.1944	26.2214	0.963505	0.536417					60.7897	63.3184	0.942857	0.781709					50.0039	22.72	0.733334	0.382206
40.5696	41.6569	0.910653	0.538426	40.5696	54.7459	0.988808	0.587632					41.7725	4.4637	0.688311	0.0560268	41.7725	24.055	0.860389	0.22026	41.7725	22.1138	0.699208	0.303673	57.411	25.418	0.929825	0.490695	57.411	36.8379	0.967153	0.753601					61.0199	76.185	0.946428	0.940556					50.1933	22.0741	0.736111	0.37134
40.7227	42.1693	0.91409	0.545049	40.7227	42.2315	0.992539	0.453305					41.9302	4.7517	0.69091	0.0596417	41.9302	23.95	0.863637	0.219298	41.9302	27.2611	0.701848	0.374357	57.6277	24.7556	0.933334	0.477907	57.6277	34.45	0.970804	0.704751					61.2502	63.95	0.95	0.789506					50.3827	17.6778	0.738889	0.297384
40.8758	49.453	0.917526	0.639193	40.8758	21.4973	0.996271	0.230748					42.0878	6.1635	0.693507	0.0773621	42.0878	22.961	0.866883	0.210242	42.0878	30.0043	0.704486	0.412027	57.8443	26.0659	0.936842	0.503203	57.8443	40.2238	0.974453	0.822867					61.4804	65.7362	0.95357	0.811558					50.5721	19.73	0.741667	0.331907
41.0288	48.4906	0.920961	0.626753	41.0288	15	1	0.161007					42.2454	4.548	0.696103	0.0570849	42.2454	26.123	0.87013	0.239195	42.2454	28.4148	0.707124	0.3902	58.061	38.9805	0.940352	0.752519	58.061	39.1443	0.978103	0.800784					61.7107	65.4408	0.957142	0.807911					50.7615	19.1911	0.744444	0.322841
41.1819	43.8349	0.924397	0.566577									42.4031	5	0.698702	0.0627583	42.4031	29.146	0.873378	0.266875	42.4031	28.4081	0.709763	0.390108	58.2776	30.3514	0.94386	0.585934	58.2776	48.8825	0.981752	1					61.941	70.4444	0.960714	0.869684					50.9509	14.0285	0.747222	0.235994
41.335	46.0971	0.927834	0.595817									42.5607	5	0.701299	0.0627583	42.5607	28.075	0.876624	0.257069	42.5607	30.1109	0.712401	0.413491	58.4943	38.9889	0.94737	0.752681	58.4943	41.7864	0.985403	0.854834					62.1712	68.4388	0.964285	0.844923					51.1403	12.5	0.75	0.210281
41.4881	50.1729	0.93127	0.648498									42.7183	6.4733	0.703896	0.0812506	42.7183	29.364	0.87987	0.268872	42.7183	28.8744	0.715039	0.396511	58.7109	32.786	0.950878	0.632934	58.7109	25.3004	0.989052	0.517576					62.4015	73.4543	0.967857	0.906843					51.3297	15.2137	0.752777	0.255932
41.6412	53.8082	0.934707	0.695485									42.876	6.6105	0.706494	0.0829727	42.876	28.657	0.883118	0.262398	42.876	30.2893	0.717679	0.415941	58.9276	32.5153	0.954387	0.627708	58.9276	30.3503	0.992702	0.620883					62.6318	66.751	0.971429	0.824086					51.5191	15.9407	0.755555	0.268162
41.7943	57.0376	0.938144	0.737226									43.0336	3.0965	0.709091	0.0388662	43.0336	30.942	0.886364	0.283321	43.0336	35.4085	0.720317	0.486239	59.1442	32.0687	0.957895	0.619087	59.1442	34.6463	0.996351	0.708767					62.862	57.525	0.974999	0.710185					51.7085	14.2917	0.758333	0.240421
41.9474	60.8556	0.94158	0.786574									43.1912	4.0179	0.711688	0.0504313	43.1912	34.419	0.88961	0.315158	43.1912	24.4345	0.722955	0.335541	59.3608	26.1919	0.961403	0.505635	59.3608	29	1	0.593259					63.0923	55.098	0.978571	0.680222					51.8979	17.283	0.76111	0.290742
42.1005	60.0007	0.945017	0.775524									43.3489	5.8776	0.714286	0.0737736	43.3489	33.857	0.892858	0.310012	43.3489	27.6263	0.725594	0.379372	59.5775	29.0169	0.964913	0.560172									63.3226	70.5918	0.982143	0.871504					52.0873	18.0648	0.763888	0.303894
42.2536	60.4361	0.948453	0.781152									43.5065	6.2523	0.716883	0.0784767	43.5065	35.08	0.896104	0.32121	43.5065	34.2507	0.728232	0.47034	59.7941	35.4582	0.968421	0.684521									63.5528	81	0.985714	1					52.2768	11.7333	0.766667	0.197383
42.4067	66.3462	0.95189	0.857542									43.6641	7.794	0.71948	0.0978276	43.6641	38.094	0.899351	0.348808	43.6641	25.4552	0.73087	0.349558	60.0108	40.3331	0.971931	0.778631									63.7831	70.0321	0.989286	0.864594					52.4662	12.0624	0.769445	0.202919
42.5598	73.1204	0.955327	0.9451									43.8217	8.6439	0.722077	0.108495	43.8217	33.122	0.902597	0.303282	43.8217	28.2178	0.733508	0.387494	60.2274	46.1784	0.975439	0.891475									64.0134	61.852	0.992858	0.763605					52.6556	15.2363	0.772222	0.256312
42.7129	64.4961	0.958763	0.833629									43.9794	11.7595	0.724676	0.147601	43.9794	33.985	0.905845	0.311184	43.9794	22.4571	0.736148	0.308387	60.4441	51.8	0.978949	1									64.2436	61.1628	0.996428	0.755096					52.845	15.695	0.775	0.264028
42.866	66.9704	0.9622	0.86561									44.137	11.4215	0.727272	0.143359	44.137	35.777	0.909091	0.327592	44.137	23.1553	0.738786	0.317975	60.6607	47.1828	0.982457	0.910865									64.4739	63	1	0.777778					53.0344	11.1481	0.777778	0.187538
43.0191	68.136	0.965636	0.880675									44.2946	14.6589	0.729869	0.183993	44.2946	36.614	0.912337	0.335256	44.2946	19.9229	0.741424	0.273587	60.8774	41.8941	0.985966	0.808766																	53.2238	10.8524	0.780555	0.182564
43.1721	63.312	0.969071	0.818324									44.4523	8.4258	0.732468	0.105758	44.4523	37.853	0.915585	0.346601	44.4523	25.487	0.744064	0.349994	61.094	35.487	0.989474	0.685077																	53.4132	16.9467	0.783333	0.285085
43.3252	68.1988	0.972507	0.881487									44.6099	8.9044	0.735065	0.111765	44.6099	38.848	0.918831	0.355712	44.6099	21.3307	0.746702	0.292919	61.3106	29.0406	0.992982	0.560629																	53.6026	20.2857	0.786111	0.341255
43.4783	69.4534	0.975944	0.897703									44.7675	6.8252	0.737662	0.0856675	44.7675	38.792	0.922077	0.355199	44.7675	22.8864	0.74934	0.314282	61.5273	41.5088	0.996492	0.801328																	53.792	20.843	0.788888	0.35063
43.6314	77.3679	0.97938	1									44.9252	8.3899	0.74026	0.105307	44.9252	36.054	0.925325	0.330129	44.9252	25.876	0.751979	0.355336	61.7439	37	1	0.714286																	53.9814	15.0833	0.791666	0.253738
43.7845	74.1183	0.982817	0.957998									45.0828	10.2212	0.742857	0.128293	45.0828	39.592	0.928572	0.362524	45.0828	19.8215	0.754617	0.272194																					54.1708	16.1815	0.794444	0.272212
43.9376	49.9903	0.986254	0.646137									45.2404	12.5524	0.745454	0.157553	45.2404	38.934	0.931818	0.356499	45.2404	13.9336	0.757255	0.19134																					54.3602	18.5235	0.797221	0.311611
44.0907	42.1329	0.98969	0.544579									45.3981	17.5864	0.748052	0.220738	45.3981	39.802	0.935066	0.364447	45.3981	13.371	0.759895	0.183614																					54.5497	17.56	0.8	0.295402
44.2438	34.8438	0.993127	0.450365									45.5557	15.0209	0.750649	0.188537	45.5557	43.487	0.938312	0.398189	45.5557	10.1088	0.762533	0.138817																					54.7391	15.4913	0.802778	0.260602
44.3969	21.3096	0.996563	0.275432									45.7133	11.8254	0.753246	0.148428	45.7133	45.511	0.941558	0.416722	45.7133	13.0867	0.765171	0.17971																					54.9285	15.6111	0.805556	0.262617
44.55	15	1	0.193879									45.871	11.7775	0.755845	0.147827	45.871	43.138	0.944806	0.394993	45.871	13.2679	0.767811	0.182198																					55.1179	12.775	0.808333	0.214907
												46.0286	11.292	0.758441	0.141733	46.0286	45.299	0.948052	0.41478	46.0286	11.1557	0.770449	0.153193																					55.3073	17.4059	0.811111	0.29281
												46.1862	8.9461	0.761038	0.112288	46.1862	44.982	0.951298	0.411878	46.1862	14.6222	0.773087	0.200796																					55.4967	19.1363	0.813889	0.321919
												46.3439	8.8053	0.763637	0.110521	46.3439	48.612	0.954546	0.445116	46.3439	22.0162	0.775726	0.302332																					55.6861	18.3533	0.816666	0.308747
												46.5015	12.5954	0.766234	0.158093	46.5015	65.714	0.957793	0.60171	46.5015	18.977	0.778364	0.260597																					55.8755	14.5046	0.819444	0.244003
												46.6591	11.5368	0.768831	0.144806	46.6591	54.457	0.961039	0.498636	46.6591	23.0549	0.781002	0.316596																					56.0649	13.8237	0.822222	0.232548
												46.8168	9.5429	0.771429	0.119779	46.8168	55.041	0.964287	0.503983	46.8168	27.2202	0.783642	0.373795																					56.2543	12.165	0.824999	0.204645
												46.9744	12.5766	0.774026	0.157857	46.9744	56.185	0.967533	0.514458	46.9744	28.9557	0.78628	0.397627																					56.4437	18.477	0.827777	0.310828
												47.132	16.262	0.776623	0.204115	47.132	69.582	0.970779	0.637128	47.132	26.3373	0.788918	0.361671																					56.6332	17.6141	0.830556	0.296312
												47.2897	13.5264	0.779221	0.169779	47.2897	77.947	0.974027	0.713722	47.2897	23.7967	0.791557	0.326783																					56.8226	22.3333	0.833334	0.375701
												47.4473	14.3689	0.781818	0.180353	47.4473	88.736	0.977273	0.812511	47.4473	24.7872	0.794195	0.340384																					57.012	20.8207	0.836111	0.350255
												47.6049	15.419	0.784415	0.193534	47.6049	93.085	0.980519	0.852333	47.6049	22.5214	0.796833	0.30927																					57.2014	17.2207	0.838889	0.289694
												47.7626	15.645	0.787014	0.196371	47.7626	109.212	0.983767	1	47.7626	28.5029	0.799473	0.391409																					57.3908	18.9683	0.841667	0.319093
												47.9202	20.1065	0.789611	0.25237	47.9202	88.032	0.987014	0.806065	47.9202	28.6876	0.802111	0.393946																					57.5802	15.2133	0.844444	0.255925
												48.0778	22.1818	0.792207	0.278418	48.0778	65.867	0.99026	0.603111	48.0778	20.6781	0.804749	0.283957																					57.7696	30.375	0.847222	0.510982
												48.2354	24.2487	0.794804	0.304361	48.2354	42.442	0.993506	0.38862	48.2354	21.0681	0.807387	0.289313																					57.959	23.2	0.849999	0.390281
												48.3931	20.3089	0.797403	0.25491	48.3931	21.221	0.996754	0.19431	48.3931	27.924	0.810027	0.38346																					58.1484	20.847	0.852777	0.350697
												48.5507	22.6	0.8	0.283667	48.5507	9	1	0.0824085	48.5507	17.6969	0.812665	0.243019																					58.3378	22.1526	0.855555	0.372661
												48.7083	25.6634	0.802597	0.322118					48.7083	25.1427	0.815303	0.345266																					58.5272	21.905	0.858332	0.368496
												48.866	21.6966	0.805195	0.272328					48.866	25.6657	0.817942	0.352448																					58.7166	19.963	0.86111	0.335826
												49.0236	25.8885	0.807792	0.324943					49.0236	27.4373	0.82058	0.376776																					58.9061	17.8667	0.863889	0.300562
												49.1812	25.8629	0.810389	0.324622					49.1812	22.9971	0.823218	0.315802																					59.0955	19.0667	0.866667	0.320748
												49.3389	23.9558	0.812987	0.300685					49.3389	17.9451	0.825858	0.246427																					59.2849	21.0909	0.869445	0.3548
												49.4965	22.387	0.815584	0.280994					49.4965	23.0264	0.828496	0.316205																					59.4743	20.5052	0.872222	0.344948
												49.6541	26.8678	0.818181	0.337235					49.6541	24.9302	0.831134	0.342348																					59.6637	19.75	0.875	0.332243
												49.8118	28.9329	0.82078	0.363156					49.8118	22.3473	0.833774	0.306879																					59.8531	22.3719	0.877777	0.37635
												49.9694	28.0666	0.823376	0.352282					49.9694	30.5369	0.836412	0.419341																					60.0425	26.6739	0.880555	0.44872
												50.127	28.8896	0.825973	0.362612					50.127	21.0294	0.83905	0.288781																					60.2319	21.8	0.883333	0.366729
												50.2847	29.9086	0.828572	0.375402					50.2847	20.1029	0.841689	0.276058																					60.4213	25.9	0.88611	0.435701
												50.4423	29.9737	0.831169	0.376219					50.4423	17.1986	0.844327	0.236176																					60.6107	23.2593	0.888888	0.391278
												50.5999	30.6779	0.833766	0.385058					50.5999	18.4356	0.846965	0.253163																					60.8001	17.115	0.891666	0.287916
												50.7576	35.1306	0.836364	0.440947					50.7576	26.2651	0.849605	0.360679																					60.9895	17.9133	0.894443	0.301345
												50.9152	34.6876	0.838961	0.435387					50.9152	35.778	0.852243	0.491313																					61.179	18.4596	0.897222	0.310536
												51.0728	37.2083	0.841558	0.467026					51.0728	28.1691	0.854881	0.386826																					61.3684	13.16	0.9	0.221383
												51.2305	35.9965	0.844156	0.451815					51.2305	18.8575	0.85752	0.258956																					61.5578	13.1481	0.902778	0.221183
												51.3881	41.3832	0.846753	0.519427					51.3881	19.339	0.860158	0.265568																					61.7472	28.0281	0.905555	0.471501
												51.5457	37.6577	0.84935	0.472666					51.5457	28.1329	0.862796	0.386328																					61.9366	25.9333	0.908333	0.436261
												51.7034	31.8935	0.851949	0.400316					51.7034	29.5249	0.865436	0.405444																					62.126	27.6444	0.911111	0.465046
												51.861	38.0182	0.854546	0.477191					51.861	24.1529	0.868074	0.331674																					62.3154	32.307	0.913888	0.543483
												52.0186	35.8367	0.857142	0.44981					52.0186	32.7838	0.870712	0.450196																					62.5048	34.5	0.916666	0.580374
												52.1763	31.7705	0.859741	0.398772					52.1763	20.1486	0.873352	0.276686																					62.6942	34.0635	0.919444	0.573031
												52.3339	30.3611	0.862338	0.381082					52.3339	27.2364	0.87599	0.374017																					62.8836	35.5704	0.922221	0.598381
												52.4915	34.9593	0.864935	0.438797					52.4915	41.6088	0.878628	0.571383																					63.073	34.53	0.924999	0.580879
												52.6492	33.8953	0.867533	0.425442					52.6492	35.4353	0.881267	0.486607																					63.2625	30.197	0.927778	0.507987
												52.8068	28.0417	0.87013	0.35197					52.8068	25.8319	0.883905	0.35473																					63.4519	31.088	0.930556	0.522976
												52.9644	32.444	0.872727	0.407226					52.9644	39.2081	0.886543	0.538416																					63.6413	29.9733	0.933333	0.504224
												53.122	34.7971	0.875324	0.436761					53.122	42.1929	0.889181	0.579404																					63.8307	30.1683	0.936111	0.507504
												53.2797	33.6618	0.877922	0.422511					53.2797	41.0721	0.891821	0.564013																					64.0201	31.4244	0.938889	0.528635
												53.4373	30.9707	0.880519	0.388733					53.4373	37.3399	0.894459	0.512761																					64.2095	23.905	0.941666	0.40214
												53.5949	30.2958	0.883116	0.380262					53.5949	35.4023	0.897097	0.486154																					64.3989	32	0.944444	0.538318
												53.7526	32.5878	0.885715	0.409031					53.7526	41.8789	0.899737	0.575092																					64.5883	35.3394	0.947222	0.594495
												53.9102	31.6451	0.888311	0.397198					53.9102	29.9359	0.902375	0.411088																					64.7777	38.28	0.949999	0.643963
												54.0678	31.1147	0.890908	0.390541					54.0678	27.0235	0.905013	0.371094																					64.9671	38.2304	0.952777	0.643129
												54.2255	33.4187	0.893507	0.41946					54.2255	27.5176	0.907652	0.377879																					65.1565	40.7541	0.955555	0.685584
												54.3831	32.6085	0.896104	0.40929					54.3831	41.011	0.91029	0.563174																					65.3459	40.2917	0.958332	0.677805
												54.5407	35.9896	0.898701	0.451729					54.5407	42.6638	0.912928	0.585871																					65.5354	37.78	0.961111	0.635552
												54.6984	32.039	0.901299	0.402142					54.6984	34.4726	0.915568	0.473387																					65.7248	39.2891	0.963889	0.660939
												54.856	31.8494	0.903896	0.399763					54.856	36.9498	0.918206	0.507404																					65.9142	41.84	0.966667	0.703851
												55.0136	36.05	0.906493	0.452487					55.0136	34.892	0.920844	0.479146																					66.1036	42.7569	0.969444	0.719275
												55.1713	39.3554	0.909091	0.493975					55.1713	40.6304	0.923483	0.557947																					66.293	45.5556	0.972222	0.766356
												55.3289	37.6786	0.911688	0.472929					55.3289	45.2311	0.926121	0.621125																					66.4824	45.58	0.975	0.766767
												55.4865	35.4865	0.914285	0.445414					55.4865	38.0813	0.928759	0.522942																					66.6718	44.24	0.977777	0.744225
												55.6442	35.9033	0.916884	0.450646					55.6442	37.8691	0.931399	0.520029																					66.8612	51.0307	0.980555	0.858461
												55.8018	36.5985	0.91948	0.459372					55.8018	42.8726	0.934037	0.588738																					67.0506	53.2933	0.983333	0.896523
												55.9594	37.3161	0.922077	0.468379					55.9594	49.22	0.936675	0.675902																					67.24	59.4444	0.98611	1
												56.1171	34.7976	0.924676	0.436767					56.1171	26.7239	0.939315	0.36698																					67.4294	53.2756	0.988888	0.896226
												56.2747	40.515	0.927273	0.50853					56.2747	35.7559	0.941953	0.491009																					67.6188	49.5867	0.991666	0.834169
												56.4323	47.8688	0.92987	0.600832					56.4323	43.5677	0.944591	0.598283																					67.8083	51.4148	0.994445	0.864923
												56.59	42.6355	0.932468	0.535146					56.59	38.2597	0.94723	0.525392																					67.9977	38.2578	0.997222	0.64359
												56.7476	43.8507	0.935065	0.550399					56.7476	47.5236	0.949868	0.652607																					68.1871	25	1	0.420561
												56.9052	46.4353	0.937662	0.58284					56.9052	40.0359	0.952506	0.549784
												57.0629	46.5915	0.94026	0.5848					57.0629	27.5493	0.955146	0.378314
												57.2205	50.0294	0.942857	0.627952					57.2205	40.9696	0.957784	0.562605
												57.3781	52.2261	0.945454	0.655524					57.3781	50.5144	0.960422	0.693677
												57.5357	54.4271	0.948051	0.68315					57.5357	49.5499	0.96306	0.680432
												57.6934	52.9504	0.95065	0.664615					57.6934	38.9114	0.9657	0.534342
												57.851	56.5751	0.953246	0.710111					57.851	39.6721	0.968338	0.544788
												58.0086	51.2156	0.955843	0.64284					58.0086	52.3531	0.970975	0.718927
												58.1663	51.0148	0.958442	0.64032					58.1663	72.8212	0.973615	1
												58.3239	55.3501	0.961039	0.694735					58.3239	47.5531	0.976253	0.653012
												58.4815	57.2017	0.963636	0.717976					58.4815	55.7531	0.978891	0.765616
												58.6392	56.8	0.966234	0.712934					58.6392	68.4381	0.981531	0.93981
												58.7968	61.6765	0.968831	0.774142					58.7968	57.0781	0.984169	0.783812
												58.9544	58.6237	0.971428	0.735824					58.9544	68.5201	0.986807	0.940936
												59.1121	55.844	0.974026	0.700934					59.1121	64.8062	0.989446	0.889936
												59.2697	66.2012	0.976623	0.830934					59.2697	49.9995	0.992084	0.686606
												59.4273	64.4674	0.97922	0.809172					59.4273	47.5312	0.994722	0.652711
												59.585	67.3957	0.981819	0.845927					59.585	49.2937	0.997362	0.676914
												59.7426	70.056	0.984415	0.879318					59.7426	33	1	0.453165
												59.9002	68.4449	0.987012	0.859096
												60.0579	71.3506	0.989611	0.895568
												60.2155	75.013	0.992208	0.941537
												60.3731	79.6708	0.994805	1
												60.5308	70.6276	0.997403	0.886493
												60.6884	42	1	0.527169

## Sheet: 16-cells
1								2								3								4
X	Y			X	Y			X	Y			X	Y			X	Y			X	Y			X	Y			X	Y
0	13	0	0.388668	0	21	0	0.496756	0	14	0	0.172473	0	8	0	0.100003	0	18	0	0.300043	0	36	0	0.675303	0	16	0	0.569863	0	17	0	0.413184
0.1622	14.7677	0.0039377	0.441517	0.1622	18.0574	0.00485521	0.427148	0.1576	24.6238	0.00353285	0.303353	0.1576	14.3028	0.00308579	0.178791	0.1849	28.8384	0.00584893	0.480709	0.1849	36.9139	0.0051555	0.692446	0.2076	15.4256	0.00512903	0.549405	0.2076	12.1286	0.00574805	0.294785
0.3243	17.3305	0.00787296	0.518139	0.3243	22.1444	0.00970743	0.523827	0.3153	30.2995	0.00706794	0.373275	0.3153	8.3292	0.00617354	0.104119	0.3697	29.7842	0.0116947	0.496474	0.3697	35.771	0.0103082	0.671007	0.4151	10.1521	0.0102556	0.361582	0.4151	11.5567	0.0114933	0.280885
0.4865	17.0914	0.0118107	0.51099	0.4865	21.9203	0.0145626	0.518525	0.4729	44.8066	0.0106008	0.551996	0.4729	9	0.00925933	0.112504	0.5546	31.5891	0.0175436	0.52656	0.5546	32.4347	0.0154637	0.608424	0.6227	9.4154	0.0153846	0.335343	0.6227	17.3948	0.0172414	0.42278
0.6487	14.9296	0.0157484	0.446358	0.6487	17.8582	0.0194179	0.422436	0.6305	53.7709	0.0141336	0.662432	0.6305	13.524	0.0123451	0.169056	0.7395	32.4528	0.0233926	0.540958	0.7395	26.8068	0.0206192	0.502853	0.8303	11.4547	0.0205136	0.407976	0.8303	18.5697	0.0229894	0.451335
0.8109	15.6346	0.0196861	0.467436	0.8109	18.4565	0.0242731	0.436589	0.7882	49.7587	0.0176687	0.613003	0.7882	16.5099	0.0154329	0.206381	0.9243	33.4546	0.0292383	0.557657	0.9243	30.2887	0.0257719	0.568168	1.0378	11.3932	0.0256402	0.405786	1.0378	17.9797	0.0287347	0.436996
0.973	19.243	0.0236213	0.575318	0.973	20.346	0.0291253	0.481285	0.9458	52.6663	0.0212016	0.648823	0.9458	22.1728	0.0185187	0.277169	1.1092	31.819	0.0350873	0.530393	1.1092	29.6483	0.0309274	0.556155	1.2454	15.6	0.0307692	0.555617	1.2454	18.4887	0.0344828	0.449367
1.1352	18.6148	0.027559	0.556536	1.1352	15.5549	0.0339805	0.367952	1.1034	46.0738	0.0247344	0.567607	1.1034	22.2788	0.0216045	0.278494	1.2941	30.9012	0.0409362	0.515094	1.2941	21.3143	0.0360829	0.399823	1.453	14.8718	0.0358983	0.529681	1.453	18.954	0.0402308	0.460676
1.2974	17.1241	0.0314967	0.511968	1.2974	21.4813	0.0388357	0.508141	1.2611	44.1012	0.0282695	0.543306	1.2611	21.5528	0.0246922	0.269419	1.479	24.9129	0.0467851	0.415275	1.479	28.2018	0.0412384	0.529021	1.6605	12.0359	0.0410248	0.428676	1.6605	16.5837	0.0459761	0.403066
1.4595	14.3028	0.035432	0.427618	1.4595	20.0666	0.0436879	0.474676	1.4187	40.3976	0.0318024	0.497679	1.4187	15.1667	0.027778	0.18959	1.6638	26.6814	0.0526309	0.444754	1.6638	34.9742	0.0463911	0.656061	1.8681	11.7538	0.0461538	0.418629	1.8681	19.8002	0.0517241	0.481243
1.6217	10.9477	0.0393697	0.327309	1.6217	23.6267	0.0485431	0.55889	1.5763	43.5292	0.0353352	0.536259	1.5763	16.1619	0.0308638	0.202031	1.8487	33.5882	0.0584798	0.559884	1.8487	29.0122	0.0515467	0.544223	2.0757	12.8205	0.0512829	0.456621	2.0757	18.7603	0.0574722	0.455968
1.7839	14.425	0.0433074	0.431272	1.7839	20.1262	0.0533983	0.476086	1.734	48.7559	0.0388703	0.600649	1.734	26.1728	0.0339515	0.327171	2.0336	33.2946	0.0643288	0.55499	2.0336	25.3455	0.0567022	0.475441	2.2832	14.6667	0.0564094	0.522376	2.2832	13.0964	0.0632175	0.318307
1.9461	14.7829	0.0472451	0.441972	1.9461	20.8113	0.0582536	0.492292	1.8916	42.6811	0.0424031	0.525811	1.8916	28.963	0.0370373	0.36205	2.2184	22.4155	0.0701746	0.373645	2.2184	29.8798	0.0618549	0.560498	2.4908	12.4923	0.0615385	0.444932	2.4908	12.2889	0.0689655	0.298681
2.1082	13.4173	0.0511803	0.401144	2.1082	21.4677	0.0631058	0.507819	2.0492	45.5089	0.045936	0.560648	2.0492	29.297	0.0401231	0.366225	2.4033	22.928	0.0760235	0.382188	2.4033	29.252	0.0670104	0.548721	2.6984	12.4444	0.0666675	0.443226	2.6984	15.1383	0.0747136	0.367935
2.2704	12.1417	0.055118	0.363007	2.2704	18.9751	0.067961	0.448857	2.2069	44.1503	0.0494711	0.54391	2.2069	28.9794	0.0432109	0.362255	2.5882	26.8827	0.0818724	0.448109	2.5882	29.6208	0.0721659	0.555639	2.9059	12.3282	0.071794	0.439087	2.9059	13.6581	0.0804588	0.331959
2.4326	10.7256	0.0590557	0.320669	2.4326	19.2686	0.0728162	0.455799	2.3645	37.7011	0.0530039	0.464459	2.3645	33.9969	0.0462967	0.424976	2.773	30.0203	0.0877182	0.50041	2.773	28.3184	0.0773186	0.531208	3.1135	13.6923	0.0769231	0.487671	3.1135	14.7241	0.0862069	0.357868
2.5947	12.1898	0.062991	0.364445	2.5947	21.3761	0.0776684	0.505652	2.5221	34.0624	0.0565368	0.419632	2.5221	29.3621	0.0493825	0.367039	2.9579	28.4069	0.0935671	0.473516	2.9579	24.5348	0.0824741	0.460234	3.3211	14.2667	0.0820521	0.508129	3.3211	14.2749	0.0919549	0.346951
2.7569	22.342	0.0669287	0.66797	2.7569	16.8452	0.0825236	0.398474	2.6797	35.2468	0.0600696	0.434224	2.6797	38.8927	0.0524682	0.486175	3.1428	27.0009	0.0994161	0.45008	3.1428	28.428	0.0876296	0.533264	3.5286	9.7624	0.0871787	0.347702	3.5286	13.3813	0.0977002	0.325232
2.9191	16.1814	0.0708664	0.483784	2.9191	17.6819	0.0873788	0.418266	2.8374	39.1588	0.0636047	0.482418	2.8374	36.7778	0.055556	0.459738	3.3276	27.856	0.105262	0.464333	3.3276	35.5109	0.0927823	0.666128	3.7362	10.2	0.0923077	0.363288	3.7362	13.0809	0.103448	0.31793
3.0813	14.5069	0.0748041	0.43372	3.0813	17.4563	0.0922341	0.412929	2.995	36.779	0.0671376	0.4531	2.995	39.1612	0.0586418	0.489532	3.5125	27.7778	0.111111	0.46303	3.5125	30.5696	0.0979378	0.573437	3.9438	9.8769	0.0974367	0.35178	3.9438	11.939	0.109196	0.290177
3.2434	13.1831	0.0787394	0.394142	3.2434	16.8248	0.0970863	0.397991	3.1526	39.0028	0.0706704	0.480496	3.1526	38.8313	0.0617276	0.485408	3.6974	24.3062	0.11696	0.405161	3.6974	24.1764	0.103093	0.453511	4.1513	8.6667	0.102563	0.308677	4.1513	11.2023	0.114942	0.272271
3.4056	8.943	0.0826771	0.267373	3.4056	23.93	0.101941	0.566065	3.3103	39.725	0.0742055	0.489393	3.3103	37.6358	0.0648153	0.470463	3.8823	28.0951	0.122809	0.468319	3.8823	22.2647	0.108249	0.417651	4.3589	9.6615	0.107692	0.344109	4.3589	11.3115	0.12069	0.274925
3.5678	11.7877	0.0866147	0.352423	3.5678	16.5074	0.106797	0.390483	3.4679	37.5264	0.0777383	0.462307	3.4679	37.8176	0.0679011	0.472736	4.0671	27.1822	0.128654	0.453102	4.0671	17.7237	0.113402	0.332469	4.5665	11.8051	0.112821	0.420456	4.5665	9.826	0.126438	0.23882
3.7299	6.3366	0.09055	0.189449	3.7299	17.3533	0.111649	0.410493	3.6255	35.1605	0.0812712	0.43316	3.6255	36.1711	0.0709869	0.452154	4.252	28.5848	0.134503	0.476482	4.252	15.0171	0.118557	0.281697	4.774	12.7726	0.117948	0.454915	4.774	9.5275	0.132183	0.231565
3.8921	6.903	0.0944877	0.206383	3.8921	18.3188	0.116504	0.433332	3.7832	39.4545	0.0848063	0.48606	3.7832	34.1481	0.0740747	0.426866	4.4369	21.5365	0.140352	0.358993	4.4369	16.3657	0.123713	0.306995	4.9816	13.3538	0.123077	0.475615	4.9816	15.7313	0.137931	0.382348
4.0543	13.2396	0.0984254	0.395831	4.0543	20.6003	0.121359	0.487301	3.9408	40.4406	0.0883391	0.498209	3.9408	28.6139	0.0771604	0.357686	4.6217	21.8504	0.146198	0.364226	4.6217	23.4667	0.128865	0.440198	5.1892	11	0.128206	0.391781	5.1892	14.8462	0.143679	0.360836
4.2165	7.5011	0.102363	0.224264	4.2165	17.6385	0.126215	0.417239	4.0984	41.5892	0.091872	0.512359	4.0984	24.5117	0.0802462	0.306407	4.8066	25.8618	0.152047	0.431092	4.8066	21.8327	0.134021	0.409547	5.3967	13.8222	0.133333	0.492298	5.3967	9.3673	0.149424	0.227672
4.3786	9.6133	0.106298	0.287414	4.3786	23.0701	0.131067	0.545724	4.2561	36.3181	0.0954071	0.447422	4.2561	26.25	0.083334	0.328136	4.9915	20.5845	0.157896	0.343124	4.9915	30.6464	0.139176	0.574878	5.6043	14.6923	0.138462	0.523288	5.6043	11.5707	0.155172	0.281225
4.5408	7.3122	0.110236	0.218617	4.5408	19.904	0.135922	0.47083	4.4137	32.8653	0.0989399	0.404885	4.4137	28.3306	0.0864198	0.354144	5.1763	23.687	0.163742	0.39484	5.1763	24.759	0.144329	0.46444	5.8119	13.9538	0.143591	0.496985	5.8119	12.0803	0.16092	0.293611
4.703	4.622	0.114174	0.138186	4.703	17.7898	0.140777	0.420818	4.5713	34.2095	0.102473	0.421445	4.5713	28.4208	0.0895056	0.355272	5.3612	24.598	0.169591	0.410025	5.3612	18.5671	0.149484	0.348289	6.0194	10.3214	0.148717	0.367612	6.0194	13.2222	0.166666	0.321365
4.8651	3.9168	0.118109	0.117103	4.8651	15.2685	0.145629	0.361177	4.729	33.7527	0.106008	0.415817	4.729	29.7531	0.0925933	0.371926	5.5461	19.2142	0.17544	0.320283	5.5461	21.4738	0.15464	0.402815	6.227	11.2308	0.153846	0.400001	6.227	15.0583	0.172414	0.365991
5.0273	9.416	0.122047	0.281515	5.0273	15.5175	0.150485	0.367067	4.8866	35.42	0.109541	0.436357	4.8866	30.2476	0.0956791	0.378108	5.7309	19.9892	0.181285	0.333201	5.7309	19.2338	0.159793	0.360796	6.4346	8.4393	0.158975	0.300578	6.4346	14.7455	0.178162	0.358388
5.1895	7.0884	0.125984	0.211926	5.1895	17.2402	0.15534	0.407818	5.0442	34.8056	0.113074	0.428788	5.0442	23.3196	0.0987649	0.291505	5.9158	18.7575	0.187134	0.31267	5.9158	19.9708	0.164948	0.374621	6.6421	12.1077	0.164102	0.431234	6.6421	16.9268	0.183907	0.411405
5.3517	8.9089	0.129922	0.266354	5.3517	14.6333	0.160195	0.346151	5.2019	34.905	0.116609	0.430013	5.2019	28.8951	0.101853	0.361201	6.1007	22.0065	0.192983	0.366828	6.1007	14.2067	0.170104	0.266495	6.8497	13.0308	0.169231	0.464111	6.8497	15.2271	0.189655	0.370094
5.5138	9.8189	0.133857	0.293561	5.5138	14.7136	0.165047	0.348051	5.3595	27.754	0.120141	0.341916	5.3595	28.823	0.104938	0.3603	6.2855	19.2755	0.198829	0.321304	6.2855	16.2603	0.175256	0.305018	7.0573	13.3556	0.17436	0.475679	7.0573	13.3813	0.195403	0.325232
5.676	6.9533	0.137795	0.207886	5.676	15.3592	0.169902	0.363322	5.5171	28.033	0.123674	0.345353	5.5171	29.1578	0.108024	0.364485	6.4704	18.8987	0.204678	0.315023	6.4704	18.311	0.180412	0.343485	7.2648	13.0855	0.179486	0.466059	7.2648	9.8851	0.201149	0.240257
5.8382	4.3889	0.141733	0.131217	5.8382	15.8708	0.174758	0.375424	5.6748	29.3426	0.127209	0.361487	5.6748	28.1111	0.111112	0.351401	6.6553	17.2853	0.210527	0.28813	6.6553	21.4452	0.185567	0.402278	7.4724	10.6154	0.184615	0.378083	7.4724	8.3579	0.206897	0.203138
6.0004	4.6395	0.14567	0.13871	6.0004	15.009	0.179613	0.355038	5.8324	27.0398	0.130742	0.333117	5.8324	34.7541	0.114198	0.434441	6.8402	18.7947	0.216376	0.31329	6.8402	31.2972	0.190723	0.587086	7.68	9.6769	0.189744	0.344657	7.68	8.0778	0.212645	0.19633
6.1625	3.9478	0.149606	0.118029	6.1625	14.1271	0.184465	0.334177	5.99	31.1822	0.134275	0.38415	5.99	28.9465	0.117284	0.361843	7.025	23.3333	0.222222	0.388944	7.025	30.6802	0.195876	0.575512	7.8875	9.9761	0.194871	0.355313	7.8875	8.0851	0.21839	0.196508
6.3247	2.9923	0.153543	0.0894623	6.3247	14.8525	0.18932	0.351336	6.1477	37.9186	0.13781	0.467139	6.1477	30.6451	0.120371	0.383077	7.2099	16.4949	0.22807	0.274954	7.2099	30.9185	0.201031	0.579982	8.0951	10.8	0.2	0.384658	8.0951	8.1415	0.224138	0.197879
6.4869	4.8898	0.157481	0.146193	6.4869	14.2681	0.194176	0.337512	6.3053	31.9879	0.141343	0.394076	6.3053	32.5857	0.123457	0.407335	7.3948	18.0483	0.233919	0.300848	7.3948	30.1382	0.206187	0.565345	8.3027	12.0256	0.205129	0.428309	8.3027	10.7045	0.229886	0.260172
6.649	4.5748	0.161416	0.136775	6.649	16.8532	0.199028	0.398663	6.4629	32.5133	0.144876	0.400548	6.4629	30.0552	0.126543	0.375703	7.5796	21.4992	0.239765	0.358371	7.5796	25.7889	0.211339	0.483759	8.5102	9.2359	0.210256	0.32895	8.5102	12.0412	0.235631	0.292661
6.8112	3.622	0.165354	0.108289	6.8112	18.2867	0.203883	0.432573	6.6206	33.8433	0.148411	0.416933	6.6206	26.4444	0.129631	0.330566	7.7645	24.8541	0.245614	0.414294	7.7645	20.3159	0.216495	0.381094	8.7178	10.7846	0.215385	0.384109	8.7178	11.8704	0.241379	0.288509
6.9734	5.0218	0.169292	0.150139	6.9734	18.654	0.208738	0.441261	6.7782	30.7731	0.151944	0.37911	6.7782	28.5566	0.132716	0.35697	7.9494	21.6544	0.251463	0.360958	7.9494	24.7929	0.22165	0.465076	8.9254	7.8821	0.220514	0.280733	8.9254	13.5861	0.247127	0.330209
7.1356	1.5235	0.173229	0.0455489	7.1356	14.2844	0.213593	0.337898	6.9358	26.379	0.155477	0.324977	6.9358	28.8107	0.135802	0.360146	8.1342	13.956	0.257309	0.232633	8.1342	34.8763	0.226803	0.654224	9.1329	5.4872	0.22564	0.195435	9.1329	17.2757	0.252873	0.419885
7.2977	2.4969	0.177165	0.0746511	7.2977	14.3392	0.218446	0.339194	7.0934	35.5915	0.15901	0.43847	7.0934	29.9167	0.138888	0.373971	8.3191	14.9058	0.263158	0.248466	8.3191	27.9408	0.231959	0.524125	9.3405	6.1538	0.230769	0.219177	9.3405	17.3805	0.258621	0.422432
7.4599	2.8505	0.181102	0.0852229	7.4599	15.2395	0.223301	0.360491	7.2511	30.1561	0.162545	0.371509	7.2511	37.3224	0.141976	0.466546	8.504	16.3536	0.269007	0.272599	8.504	29.7117	0.237114	0.557344	9.5481	7.9009	0.235898	0.281402	9.5481	17.0321	0.264369	0.413964
7.6221	3.2378	0.18504	0.0968022	7.6221	13.9759	0.228156	0.3306	7.4087	29.9738	0.166077	0.369263	7.4087	34.2644	0.145062	0.428319	8.6888	14.1733	0.274852	0.236256	8.6888	30.543	0.242267	0.572938	9.7556	12.8667	0.241025	0.458266	9.7556	20.0608	0.270114	0.487577
7.7842	3.4432	0.188975	0.102943	7.7842	12.5664	0.233008	0.297259	7.5663	31.7948	0.16961	0.391697	7.5663	28.6296	0.148147	0.357882	8.8737	15.639	0.280701	0.260687	8.8737	23.5934	0.247422	0.442575	9.9632	13.4	0.246154	0.477261	9.9632	15.3829	0.275862	0.37388
7.9464	5.0244	0.192913	0.150217	7.9464	14.2087	0.237863	0.336107	7.724	24.4446	0.173145	0.301146	7.724	31.9156	0.151235	0.398958	9.0586	16.526	0.28655	0.275473	9.0586	31.2222	0.252578	0.585679	10.1708	13.3846	0.251283	0.476712	10.1708	15.2929	0.28161	0.371693
8.1086	4.1562	0.196851	0.12426	8.1086	14.2918	0.242719	0.338073	7.8816	24.0883	0.176678	0.296756	7.8816	30.7243	0.154321	0.384067	9.2435	20.9218	0.292399	0.348747	9.2435	26.3503	0.257733	0.49429	10.3783	17.812	0.256409	0.634401	10.3783	16.9341	0.287355	0.411582
8.2708	6.1709	0.200789	0.184495	8.2708	12.1185	0.247574	0.286664	8.0392	28.5901	0.180211	0.352216	8.0392	24.5679	0.157407	0.307109	9.4283	20.7128	0.298245	0.345263	9.4283	22.435	0.262886	0.420845	10.5859	16.1077	0.261538	0.573699	10.5859	15.1879	0.293103	0.369141
8.4329	10.8151	0.204724	0.323345	8.4329	14.7716	0.252426	0.349423	8.1969	28.6679	0.183746	0.353175	8.1969	20.5336	0.160494	0.256679	9.6132	17.7947	0.304094	0.296621	9.6132	21.0825	0.268041	0.395474	10.7935	12.5111	0.266667	0.445601	10.7935	17.1225	0.298851	0.416161
8.5951	9.4403	0.208661	0.282241	8.5951	18.2632	0.257281	0.432017	8.3545	26.5156	0.187279	0.326659	8.3545	16.6866	0.16358	0.20859	9.7981	19.9889	0.309943	0.333196	9.7981	21.1688	0.273197	0.397093	11.001	11.3863	0.271794	0.40554	11.001	14.2263	0.304597	0.345769
8.7573	4.96	0.212599	0.148292	8.7573	15.1496	0.262137	0.358364	8.5121	27.2193	0.190812	0.335329	8.5121	12.6667	0.166666	0.158339	9.9829	22.1274	0.315789	0.368843	9.9829	20.6241	0.27835	0.386875	11.2086	15.7692	0.276923	0.561643	11.2086	11.365	0.310345	0.276226
8.9194	4.2248	0.216534	0.126311	8.9194	15.3655	0.266989	0.363471	8.6698	25.9014	0.194347	0.319093	8.6698	6.5713	0.169754	0.082144	10.1678	30.1684	0.321638	0.502879	10.1678	27.6223	0.283505	0.518151	11.4162	14.8462	0.282052	0.528769	11.4162	12.444	0.316093	0.302451
9.0816	5.7768	0.220472	0.172712	9.0816	13.1215	0.271844	0.31039	8.8274	23.7173	0.19788	0.292186	8.8274	10.417	0.17284	0.130217	10.3527	26.6827	0.327487	0.444775	10.3527	20.4406	0.288661	0.383433	11.6237	10.9179	0.287179	0.388857	11.6237	10.4228	0.321838	0.253326
9.2438	8.1092	0.22441	0.242445	9.2438	15.0842	0.276699	0.356817	8.985	24.8453	0.201413	0.306082	8.985	12.7377	0.175925	0.159227	10.5375	14.6667	0.333332	0.24448	10.5375	18.3093	0.293813	0.343453	11.8313	10.7231	0.292308	0.381919	11.8313	14.9762	0.327586	0.363996
9.406	8.2149	0.228348	0.245605	9.406	14.1439	0.281554	0.334574	9.1427	25.7717	0.204948	0.317495	9.1427	5.2936	0.179013	0.0661722	10.7224	17.7335	0.339181	0.295601	10.7224	19.8862	0.298969	0.373034	12.0389	13.7453	0.297437	0.489559	12.0389	15.1111	0.333334	0.367274
9.5681	12.3319	0.232283	0.368693	9.5681	13.7083	0.286407	0.32427	9.3003	21.9527	0.208481	0.270447	9.3003	4.7809	0.182099	0.0597633	10.9073	19.7781	0.34503	0.329682	10.9073	20.7646	0.304124	0.389511	12.2464	12.8701	0.302563	0.458388	12.2464	16.5265	0.33908	0.401676
9.7303	14.9959	0.23622	0.44834	9.7303	12.8795	0.291262	0.304665	9.4579	25.5915	0.212013	0.315275	9.4579	5.6173	0.185185	0.0702186	11.0921	15.8366	0.350876	0.263981	11.0921	21.0825	0.309277	0.395474	12.454	8.5385	0.307692	0.304111	12.454	19.283	0.344828	0.468672
9.8925	17.9327	0.240158	0.536143	9.8925	14.2661	0.296117	0.337465	9.6156	23.6871	0.215549	0.291814	9.6156	8.5322	0.188272	0.106656	11.277	23.8193	0.356725	0.397045	11.277	27.1532	0.314433	0.509351	12.6616	7.1265	0.312821	0.253821	12.6616	16.7894	0.350576	0.408065
10.0546	18.5685	0.244093	0.555152	10.0546	11.6793	0.300969	0.276274	9.7732	29.6912	0.219081	0.365781	9.7732	6.9794	0.191358	0.0872454	11.4619	21.8239	0.362574	0.363784	11.4619	23.8935	0.319588	0.448204	12.8691	4.8855	0.317948	0.174004	12.8691	10.0797	0.356321	0.244986
10.2168	15.0581	0.248031	0.4502	10.2168	10.8826	0.305824	0.257428	9.9308	33.6425	0.222614	0.414459	9.9308	5.8611	0.194444	0.0732662	11.6468	20.626	0.368423	0.343816	11.6468	22.991	0.324744	0.431275	13.0767	5.5077	0.323077	0.196165	13.0767	7.8549	0.362069	0.190913
10.379	16.2391	0.251969	0.485509	10.379	13.7083	0.31068	0.32427	10.0885	29.7808	0.226149	0.366885	10.0885	6.9863	0.197532	0.0873317	11.8316	21.8861	0.374268	0.364821	11.8316	21.4119	0.329896	0.401653	13.2843	5.0393	0.328206	0.179482	13.2843	11.3207	0.367817	0.275149
10.5412	18.507	0.255907	0.553313	10.5412	12.2965	0.315535	0.290874	10.2461	23.2881	0.229682	0.286898	10.2461	6.8543	0.200618	0.0856816	12.0165	17.036	0.380117	0.283974	12.0165	21.841	0.335052	0.409703	13.4918	8.1111	0.333333	0.288889	13.4918	12.5386	0.373562	0.30475
10.7033	15.0803	0.259842	0.450863	10.7033	11.7034	0.320387	0.276844	10.4037	22.9996	0.233215	0.283344	10.4037	4.9753	0.203703	0.0621933	12.2014	20.0702	0.385966	0.334551	12.2014	25.2363	0.340207	0.473393	13.6994	9.8615	0.338462	0.351232	13.6994	12.9358	0.37931	0.314404
10.8655	17.4667	0.26378	0.522211	10.8655	19.1393	0.325242	0.452741	10.5614	22.4554	0.23675	0.27664	10.5614	3.8693	0.206791	0.0483679	12.3862	19.4383	0.391812	0.324018	12.3862	23.7757	0.34536	0.445995	13.907	5.9744	0.343591	0.212787	13.907	14.4225	0.385058	0.350538
11.0277	16.2772	0.267717	0.486648	11.0277	13.6689	0.330098	0.323338	10.719	22.3792	0.240283	0.275701	10.719	3.5213	0.209877	0.0440177	12.5711	10.1899	0.397661	0.169856	12.5711	25.8141	0.350516	0.484232	14.1145	3.8205	0.348717	0.136073	14.1145	13.3333	0.390804	0.324065
11.1898	16.7183	0.271652	0.499836	11.1898	15.3447	0.33495	0.362979	10.8766	20.5832	0.243816	0.253575	10.8766	6.608	0.212963	0.0826028	12.756	12.6159	0.40351	0.210295	12.756	22.201	0.355671	0.416456	14.3221	6.2615	0.353846	0.223013	14.3221	13.0273	0.396552	0.316628
11.352	15.3274	0.27559	0.458251	11.352	15.047	0.339805	0.355937	11.0343	17.2268	0.247351	0.212226	11.0343	7.4102	0.21605	0.0926306	12.9408	14.2906	0.409356	0.238211	12.9408	17.6905	0.360824	0.331846	14.5297	8.6154	0.358975	0.30685	14.5297	14.0338	0.4023	0.341091
11.5142	14.0742	0.279528	0.420784	11.5142	15.561	0.34466	0.368096	11.1919	22.6795	0.250884	0.279401	11.1919	8.7627	0.219136	0.109537	13.1257	15.5993	0.415205	0.260026	13.1257	14.4522	0.365979	0.2711	14.7372	6.5846	0.364102	0.23452	14.7372	12.438	0.408045	0.302305
11.6764	13.2001	0.283466	0.39465	11.6764	19.1768	0.349515	0.453628	11.3495	22.7904	0.254417	0.280767	11.3495	8.7778	0.222222	0.109726	13.3106	17.9224	0.421054	0.298749	13.3106	9.9468	0.371135	0.186586	14.9448	10.1692	0.369231	0.362191	14.9448	11.6278	0.413793	0.282613
11.8385	11.5713	0.287401	0.345953	11.8385	15.9124	0.354368	0.376408	11.5071	22.2275	0.257949	0.273832	11.5071	18.0216	0.225308	0.225278	13.4954	17.2105	0.426899	0.286883	13.4954	10.2896	0.376287	0.193017	15.1524	8.5795	0.37436	0.305571	15.1524	10.1908	0.419541	0.247687
12.0007	8.6325	0.291339	0.25809	12.0007	16.243	0.359223	0.384229	11.6648	24.0107	0.261485	0.2958	11.6648	30.1962	0.228396	0.377465	13.6803	15.5436	0.432748	0.259097	13.6803	12.0095	0.381443	0.225279	15.3599	6.0821	0.379486	0.216623	15.3599	10.1838	0.425286	0.247517
12.1629	9.1895	0.295276	0.274743	12.1629	17.1615	0.364078	0.405956	11.8224	18.3988	0.265017	0.226664	11.8224	26.716	0.231481	0.333961	13.8652	19.5189	0.438597	0.325362	13.8652	10.6079	0.386598	0.198987	15.5675	12.6154	0.384615	0.449316	15.5675	12.1332	0.431034	0.294897
12.325	9.0653	0.299211	0.27103	12.325	17.1536	0.36893	0.405769	11.98	21.6384	0.26855	0.266575	11.98	31.7092	0.234567	0.396378	14.05	18	0.444443	0.300043	14.05	12.8456	0.391751	0.240963	15.7751	8.3145	0.389744	0.296133	15.7751	11.8378	0.436783	0.287717
12.4872	6.8073	0.303149	0.203521	12.4872	16.51	0.373785	0.390545	12.1377	22.3409	0.272085	0.275229	12.1377	29.9822	0.237655	0.37479	14.2349	16.4648	0.450292	0.274453	14.2349	11.585	0.396907	0.217316	15.9826	9.4889	0.394871	0.337961	15.9826	11.5904	0.442528	0.281704
12.6494	6.9524	0.307087	0.207859	12.6494	14.0448	0.378641	0.33223	12.2953	22.8313	0.275618	0.281271	12.2953	27.0494	0.240741	0.338129	14.4198	17.8947	0.456141	0.298288	14.4198	14.1139	0.402062	0.264754	16.1902	11.4	0.4	0.406028	16.1902	9.1724	0.448276	0.222935
12.8116	7.7565	0.311025	0.2319	12.8116	13.4312	0.383496	0.317715	12.4529	22.9001	0.279151	0.282118	12.4529	29.0141	0.243826	0.362688	14.6047	19.7344	0.46199	0.328954	14.6047	11.423	0.407218	0.214277	16.3978	11.6735	0.405129	0.415769	16.3978	10.1669	0.454024	0.247106
12.9737	6.0489	0.31496	0.180847	12.9737	13.037	0.388348	0.308391	12.6106	21.1527	0.282686	0.260591	12.6106	26.2867	0.246914	0.328595	14.7895	20.779	0.467836	0.346366	14.7895	19.7841	0.41237	0.371118	16.6053	11.3419	0.410256	0.403958	16.6053	14.105	0.459769	0.342821
13.1359	6.1889	0.318898	0.185033	13.1359	10.7502	0.393203	0.254296	12.7682	23.1365	0.286219	0.285031	12.7682	29	0.25	0.362512	14.9744	12.5402	0.473685	0.209033	14.9744	20.1952	0.417526	0.37883	16.8129	13.8923	0.415385	0.494795	16.8129	10.3567	0.465517	0.251719
13.2981	7.5536	0.322835	0.225834	13.2981	12.7979	0.398059	0.302735	12.9258	24.6154	0.289752	0.30325	12.9258	29.1358	0.253086	0.36421	15.1593	10.6448	0.479533	0.177439	15.1593	21.2578	0.422681	0.398763	17.0204	19.1538	0.420511	0.682191	17.0204	6.5944	0.471263	0.160276
13.4602	8.7195	0.326771	0.260691	13.4602	11.1156	0.402911	0.26294	13.0835	26.2057	0.293287	0.322842	13.0835	30.2949	0.256174	0.378699	15.3441	13.1748	0.485379	0.219611	15.3441	26.6585	0.427834	0.500071	17.228	19.0342	0.42564	0.677931	17.228	5.2615	0.477011	0.12788
13.6224	4.9589	0.330708	0.148259	13.6224	13.4404	0.407766	0.317933	13.2411	33.4468	0.29682	0.412048	13.2411	35.4815	0.259259	0.443534	15.529	9.4026	0.491228	0.156732	15.529	26.7343	0.43299	0.501493	17.4356	13.2769	0.430769	0.472876	17.4356	2.503	0.482759	0.0608353
13.7846	6.8902	0.334646	0.206	13.7846	12.829	0.412621	0.30347	13.3987	35.5189	0.300353	0.437576	13.3987	32.3014	0.262345	0.403781	15.7139	12.105	0.497077	0.201779	15.7139	21.1799	0.438145	0.397301	17.6431	11.5214	0.435896	0.410352	17.6431	2.9316	0.488504	0.0712524
13.9468	10.0241	0.338584	0.299696	13.9468	11.358	0.417476	0.268674	13.5564	29.2041	0.303888	0.35978	13.5564	29.1701	0.265433	0.364639	15.8987	10.5291	0.502923	0.17551	15.8987	20.0122	0.443298	0.375397	17.8507	12.6154	0.441025	0.449316	17.8507	4.8851	0.494252	0.118732
14.1089	9.1614	0.342519	0.273903	14.1089	11.9863	0.422329	0.283536	13.714	31.4814	0.307421	0.387836	13.714	35.0123	0.268519	0.437669	16.0836	13.783	0.508772	0.22975	16.0836	15.0272	0.448453	0.281886	18.0583	11.6154	0.446154	0.4137	18.0583	5	0.5	0.121525
14.2711	9.8306	0.346457	0.29391	14.2711	13.4255	0.427184	0.317581	13.8716	29.2308	0.310953	0.360109	13.8716	37.0302	0.271604	0.462893	16.2685	15.136	0.514621	0.252303	16.2685	18.4201	0.453609	0.345532	18.2658	9.1538	0.45128	0.326026	18.2658	6.8368	0.505745	0.166168
14.4333	14.3217	0.350394	0.428183	14.4333	11.3276	0.432039	0.267955	14.0293	29.586	0.314488	0.364485	14.0293	25.7589	0.274692	0.321997	16.4533	15.7076	0.520467	0.261831	16.4533	19.6652	0.458762	0.368888	18.4734	7.2991	0.456409	0.259968	18.4734	11.5377	0.511493	0.280423
14.5954	14.4917	0.35433	0.433266	14.5954	17.8698	0.436891	0.422711	14.1869	27.2268	0.318021	0.335421	14.1869	28.6667	0.277778	0.358346	16.6382	14.6648	0.526315	0.244448	16.6382	16.1004	0.463917	0.302018	18.681	10.3077	0.461538	0.367124	18.681	12.0725	0.517241	0.293421
14.7576	11.2592	0.358267	0.336622	14.7576	16.5465	0.441746	0.391408	14.3445	28.4418	0.321554	0.350389	14.3445	17.297	0.280864	0.21622	16.8231	23.1376	0.532164	0.385682	16.8231	23.5613	0.469073	0.441973	18.8885	11.6	0.466665	0.413151	18.8885	18.0351	0.522987	0.438342
14.9198	17.3615	0.362205	0.519066	14.9198	12.6904	0.446602	0.300192	14.5022	24.9128	0.325089	0.306914	14.5022	20.3073	0.283952	0.25385	17.008	18.9671	0.538013	0.316164	17.008	22.2095	0.474228	0.416615	19.0961	12.8222	0.471794	0.456681	19.0961	14.3917	0.528735	0.349789
15.082	17.7803	0.366143	0.531587	15.082	9.9939	0.451457	0.236406	14.6598	27.1182	0.328622	0.334083	14.6598	16.534	0.287037	0.206682	17.1928	17.3684	0.543859	0.289515	17.1928	22.6457	0.479381	0.424798	19.3037	16.2	0.476923	0.576987	19.3037	15.9703	0.534483	0.388157
15.2441	11.738	0.370078	0.350937	15.2441	9.7371	0.456309	0.230331	14.8174	43.1125	0.332155	0.531125	14.8174	17.701	0.290123	0.22127	17.3777	12.7362	0.549708	0.2123	17.3777	20.3187	0.484536	0.381147	19.5112	12.5709	0.48205	0.447731	19.5112	17.7635	0.540228	0.431741
15.4063	13.5847	0.374016	0.406149	15.4063	12.1552	0.461164	0.287532	14.9751	27.6903	0.33569	0.341131	14.9751	17.2644	0.293211	0.215812	17.5626	16	0.555557	0.266705	17.5626	20.7545	0.489692	0.389322	19.7188	14.2393	0.487179	0.507154	19.7188	19.0458	0.545976	0.462907
15.5685	16.6545	0.377953	0.497928	15.5685	12.8357	0.46602	0.303629	15.1327	24.59	0.339223	0.302937	15.1327	14.4691	0.296297	0.18087	17.7474	17.9261	0.561403	0.298811	17.7474	18.8554	0.494844	0.353697	19.9264	15.0923	0.492308	0.537534	19.9264	23.1581	0.551724	0.562856
15.7307	10.8345	0.381891	0.323925	15.7307	18.5805	0.470875	0.439522	15.2903	25.6196	0.342756	0.315621	15.2903	13.9835	0.299382	0.1748	17.9323	21.1527	0.567252	0.352596	17.9323	13	0.5	0.243859	20.1339	15.3009	0.497434	0.544964	20.1339	13.6278	0.557469	0.331223
15.8928	9.2618	0.385826	0.276905	15.8928	17.6935	0.475727	0.41854	15.448	24.1052	0.346291	0.296964	15.448	17.1043	0.30247	0.213811	18.1172	22.8849	0.573101	0.38147	18.1172	14.3293	0.505156	0.268795	20.3415	14.3556	0.502563	0.511296	20.3415	14.3785	0.563217	0.349469
16.055	8.1445	0.389764	0.2435	16.055	17.8107	0.480582	0.421313	15.6056	29.153	0.349824	0.359151	15.6056	12.7778	0.305556	0.159728	18.302	27.4875	0.578946	0.458191	18.302	16.905	0.510308	0.317111	20.5491	12.3385	0.507692	0.439454	20.5491	14.7004	0.568966	0.357292
16.2172	8.7839	0.393702	0.262617	16.2172	18.7916	0.485437	0.444516	15.7632	22.9704	0.353357	0.282984	15.7632	12.5761	0.308642	0.157207	18.4869	17.5082	0.584795	0.291845	18.4869	22.734	0.515464	0.426454	20.7566	13.0513	0.512819	0.464841	20.7566	8.3904	0.574711	0.203928
16.3793	8.1786	0.397637	0.24452	16.3793	20.5723	0.49029	0.486638	15.9209	23.1615	0.356892	0.285339	15.9209	17.3978	0.31173	0.21748	18.6718	19.2034	0.590644	0.320103	18.6718	25.7214	0.520619	0.482493	20.9642	12.159	0.517948	0.433061	20.9642	7.6885	0.580459	0.186869
16.5415	7.4016	0.401575	0.221289	16.5415	20.7133	0.495145	0.489974	16.0785	28.0967	0.360424	0.346138	16.0785	11.0988	0.314815	0.13874	18.8566	20.109	0.59649	0.335198	18.8566	24.6632	0.525772	0.462643	21.1718	11.4308	0.523077	0.407125	21.1718	10.5291	0.586207	0.255909
16.7037	8.7527	0.405512	0.261684	16.7037	17	0.5	0.402136	16.2361	34.1426	0.363957	0.42062	16.2361	10.0271	0.317901	0.125343	19.0415	17.9938	0.602339	0.29994	19.0415	29.9222	0.530927	0.561293	21.3793	12.3265	0.528203	0.439026	21.3793	8.9762	0.591952	0.218166
16.8659	9.0781	0.40945	0.271413	16.8659	13.053	0.504855	0.308769	16.3937	28.9055	0.36749	0.356102	16.3937	12.3608	0.320987	0.154515	19.2264	15.2952	0.608188	0.254957	19.2264	31.0109	0.536083	0.581715	21.5869	9	0.533333	0.320548	21.5869	10.6545	0.5977	0.258957
17.028	9.2918	0.413385	0.277802	17.028	13.3335	0.509707	0.315404	16.5514	28.4587	0.371025	0.350597	16.5514	12.0432	0.324075	0.150545	19.4113	17.819	0.614037	0.297026	19.4113	28.8711	0.541238	0.541576	21.7945	7.9231	0.538462	0.282193	21.7945	19.7907	0.603448	0.481012
17.1902	13.8544	0.417323	0.414212	17.1902	13.7746	0.514563	0.325839	16.709	27.7675	0.374558	0.342082	16.709	17.0905	0.32716	0.213638	19.5961	18.4863	0.619883	0.308149	19.5961	26.3337	0.546391	0.493979	22.002	9.7077	0.543588	0.345754	22.002	19.9178	0.609194	0.484101
17.3524	12.5254	0.421261	0.374478	17.3524	14.6641	0.519418	0.34688	16.8666	27.4409	0.378091	0.338059	16.8666	30.9266	0.330246	0.386596	19.781	21.2539	0.625732	0.354282	19.781	24.3496	0.551547	0.45676	22.2096	11.5128	0.548717	0.410045	22.2096	18.7052	0.614942	0.454629
17.5145	17.0988	0.425196	0.511212	17.5145	14.3923	0.52427	0.34045	17.0243	20.0705	0.381626	0.247259	17.0243	33.3333	0.333334	0.41668	19.9659	22.7479	0.63158	0.379186	19.9659	21.0932	0.556702	0.395675	22.4172	9.5846	0.553846	0.34137	22.4172	15.8621	0.62069	0.385527
17.6767	13.7719	0.429134	0.411746	17.6767	15.8232	0.529125	0.374298	17.1819	26.7078	0.385159	0.329027	17.1819	34.5566	0.33642	0.431972	20.1507	22.3336	0.637426	0.37228	20.1507	30.8555	0.561855	0.5788	22.6247	8.4667	0.558973	0.301554	22.6247	16.2941	0.626435	0.396027
17.8389	21.289	0.433071	0.636488	17.8389	15.0062	0.53398	0.354972	17.3395	28.5508	0.388692	0.351732	17.3395	29.6955	0.339506	0.371206	20.3356	25.9969	0.643275	0.433344	20.3356	28.6565	0.56701	0.537551	22.8323	12.0769	0.564102	0.430137	22.8323	18.4189	0.632183	0.44767
18.0011	12.9213	0.437009	0.386315	18.0011	16.1845	0.538836	0.382845	17.4972	27.3203	0.392227	0.336573	17.4972	30.8889	0.342593	0.386124	20.5205	20.6085	0.649124	0.343524	20.5205	28.3046	0.572166	0.53095	23.0399	10.4308	0.569231	0.371508	23.0399	17.3627	0.637931	0.421999
18.1632	10.2992	0.440944	0.30792	18.1632	14.0851	0.543688	0.333184	17.6548	27.3013	0.39576	0.336339	17.6548	28.8258	0.345679	0.360335	20.7053	20.6054	0.65497	0.343473	20.7053	27.0203	0.577319	0.506858	23.2474	7.6752	0.574357	0.273364	23.2474	18.0416	0.643676	0.4385
18.3254	11.874	0.444882	0.355003	18.3254	18.2223	0.548543	0.431049	17.8124	25.1266	0.399293	0.309548	17.8124	24.1598	0.348765	0.302008	20.8902	23.5931	0.660819	0.393275	20.8902	25.6623	0.582474	0.481384	23.455	9.853	0.579486	0.350929	23.455	19.8584	0.649424	0.482657
18.4876	11.7402	0.44882	0.351003	18.4876	21.0517	0.553398	0.497979	17.9701	29.6634	0.402828	0.365439	17.9701	18.0123	0.351853	0.225161	21.0751	23	0.666668	0.383388	21.0751	21.6548	0.58763	0.40621	23.6626	13.7231	0.584615	0.488768	23.6626	18.2652	0.655172	0.443935
18.6497	13.584	0.452755	0.406128	18.6497	17.9234	0.558251	0.423979	18.1277	30.1983	0.40636	0.372029	18.1277	18.0902	0.354938	0.226135	21.2599	17.8156	0.672513	0.296969	21.2599	20.4332	0.592782	0.383295	23.8701	12.8547	0.589742	0.457839	23.8701	18.524	0.660918	0.450225
18.8119	17.5737	0.456693	0.52541	18.8119	18.615	0.563106	0.440338	18.2853	26.7079	0.409893	0.329028	18.2853	15.8752	0.358024	0.198447	21.4448	25.6491	0.678362	0.427546	21.4448	21.5606	0.597938	0.404443	24.0777	13.3915	0.594871	0.476958	24.0777	17.5556	0.666666	0.426688
18.9741	16.45	0.46063	0.491814	18.9741	14.9706	0.567961	0.35413	18.443	28.6622	0.413428	0.353105	18.443	17.9444	0.361112	0.224313	21.6297	18.5623	0.684211	0.309416	21.6297	20.1069	0.603093	0.377174	24.2853	11.4	0.6	0.406028	24.2853	15.692	0.672414	0.381393
19.1363	14.7545	0.464568	0.441123	19.1363	13.6068	0.572816	0.321869	18.6006	30.0716	0.416961	0.370468	18.6006	15.7353	0.364198	0.196698	21.8145	16.6577	0.690057	0.277668	21.8145	22.0934	0.608246	0.414437	24.4928	14.6718	0.605127	0.522558	24.4928	14.4898	0.678159	0.352174
19.2984	14.8445	0.468503	0.443814	19.2984	12.6972	0.577668	0.300353	18.7582	30.6775	0.420494	0.377932	18.7582	15.5072	0.367284	0.193847	21.9994	17.8369	0.695906	0.297324	21.9994	22.0439	0.613402	0.413509	24.7004	14.3179	0.610256	0.509953	24.7004	19.2868	0.683907	0.468765
19.4606	14.444	0.472441	0.43184	19.4606	13.0552	0.582524	0.308821	18.9159	33.3453	0.424029	0.410798	18.9159	20.6049	0.370371	0.25757	22.1843	18.1893	0.701755	0.303198	22.1843	27.1344	0.618557	0.508998	24.908	14.6923	0.615385	0.523288	24.908	18.3092	0.689655	0.445004
19.6228	14.5804	0.476379	0.435918	19.6228	11.7207	0.587379	0.277254	19.0735	23.6224	0.427562	0.291017	19.0735	19.0209	0.373457	0.237769	22.3692	16.2062	0.707604	0.270142	22.3692	24.6935	0.623713	0.463211	25.1155	12.012	0.620511	0.427825	25.1155	24.1826	0.6954	0.587757
19.7849	17.1009	0.480314	0.511274	19.7849	12.5172	0.592231	0.296095	19.2311	19.5757	0.431095	0.241163	19.2311	21.0343	0.376543	0.262938	22.554	15.8473	0.71345	0.26416	22.554	20.8805	0.628865	0.391685	25.3231	16.2205	0.62564	0.577717	25.3231	24.0826	0.701149	0.585326
19.9471	18.8642	0.484252	0.563993	19.9471	14.8211	0.597086	0.350594	19.3888	17.1639	0.43463	0.211451	19.3888	26.8056	0.379631	0.335081	22.7389	16.807	0.719299	0.280157	22.7389	22.7235	0.634021	0.426257	25.5307	13.7692	0.630769	0.49041	25.5307	19.8288	0.706897	0.481938
20.1093	15.5891	0.488189	0.466075	20.1093	13.3581	0.601941	0.315986	19.5464	19.1079	0.438163	0.2354	19.5464	14.9451	0.382716	0.18682	22.9238	19.1376	0.725148	0.319006	22.9238	26.7942	0.639176	0.502617	25.7382	10.5795	0.635896	0.376804	25.7382	20.3969	0.712642	0.495745
20.2715	13.5034	0.492127	0.403718	20.2715	12.9417	0.606797	0.306136	19.704	16.7109	0.441696	0.20587	19.704	20.3076	0.385802	0.253854	23.1086	22.4235	0.730993	0.373779	23.1086	21.0805	0.644329	0.395437	25.9458	9.7009	0.641025	0.345512	25.9458	24.7848	0.71839	0.602393
20.4336	14.0786	0.496062	0.420915	20.4336	15.1403	0.611649	0.358144	19.8617	19.6199	0.445231	0.241708	19.8617	11.5556	0.38889	0.14445	23.2935	23.1053	0.736842	0.385144	23.2935	23.5153	0.649484	0.44111	26.1534	11.3385	0.646154	0.403837	26.1534	20.5541	0.724138	0.499566
20.5958	14	0.5	0.418565	20.5958	13.4725	0.616504	0.318692	20.0193	32.4261	0.448764	0.399474	20.0193	8.5868	0.391976	0.107339	23.4784	20.7861	0.742691	0.346485	23.4784	20.4772	0.65464	0.38412	26.3609	8.7983	0.65128	0.313364	26.3609	16.6429	0.729883	0.404505
20.758	13.2166	0.503938	0.395143	20.758	10.8343	0.621359	0.256286	20.1769	24.5193	0.452296	0.302066	20.1769	19.4595	0.395062	0.243252	23.6632	21.5549	0.748537	0.3593	23.6632	17.8169	0.659793	0.334217	26.5685	6.3812	0.656409	0.227276	26.5685	20.236	0.735631	0.491835
20.9201	15.7879	0.507873	0.472019	20.9201	16.4644	0.626212	0.389466	20.3346	21.7551	0.455832	0.268012	20.3346	19.9136	0.398149	0.248928	23.8481	18.9067	0.754386	0.315157	23.8481	17.3247	0.664948	0.324984	26.7761	6.7538	0.661538	0.240546	26.7761	22.0488	0.741379	0.535895
21.0823	18.4581	0.511811	0.551851	21.0823	20.5032	0.631067	0.485004	20.4922	25.2404	0.459364	0.31095	20.4922	21.358	0.401235	0.266984	24.033	26.394	0.760235	0.439963	24.033	15.6429	0.670104	0.293436	26.9836	5.1111	0.666665	0.182039	26.9836	16.4466	0.747125	0.399734
21.2445	13.0684	0.515748	0.390713	21.2445	15.614	0.635922	0.36935	20.6498	31.427	0.462897	0.387166	20.6498	19.8855	0.404321	0.248577	24.2178	21.5734	0.766081	0.359608	24.2178	20.1391	0.675256	0.377778	27.1912	4.1761	0.671794	0.148738	27.1912	20.8604	0.752873	0.507011
21.4067	10.9528	0.519686	0.327461	21.4067	15.0958	0.640777	0.357092	20.8074	26.5915	0.46643	0.327594	20.8074	19.8395	0.407407	0.248002	24.4027	21.0674	0.77193	0.351174	24.4027	19.7789	0.680412	0.371021	27.3988	3.1231	0.676923	0.111234	27.3988	18.1427	0.758621	0.440957
21.5688	11.3385	0.523621	0.338993	21.5688	11.9414	0.645629	0.282474	20.9651	29.5535	0.469965	0.364085	20.9651	30.0439	0.410494	0.375561	24.5876	23.5556	0.777778	0.39265	24.5876	18.7824	0.685567	0.352328	27.6063	5.8786	0.68205	0.209375	27.6063	19.5402	0.764366	0.474923
21.731	12.9262	0.527559	0.386461	21.731	11.6961	0.650485	0.276672	21.1227	26.9389	0.473498	0.331874	21.1227	23.9314	0.41358	0.299153	24.7725	24.1896	0.783627	0.403218	24.7725	20.067	0.690723	0.376425	27.8139	6.0188	0.687179	0.214368	27.8139	21.3719	0.770114	0.519443
21.8932	16.689	0.531497	0.49896	21.8932	12.1022	0.65534	0.286278	21.2803	29.3537	0.477031	0.361623	21.2803	19.4167	0.416666	0.242717	24.9573	28.7341	0.789473	0.47897	24.9573	15.7441	0.695876	0.295334	28.0215	8.0769	0.692308	0.287671	28.0215	18.7681	0.775862	0.456158
22.0553	11.509	0.535432	0.34409	22.0553	14.8532	0.660192	0.351353	21.438	30.3534	0.480566	0.373939	21.438	17.3278	0.419754	0.216605	25.1422	27.1126	0.795322	0.451941	25.1422	19.3593	0.701031	0.36315	28.229	9.3932	0.697434	0.334553	28.229	17.0441	0.781607	0.414256
22.2175	11.0112	0.53937	0.329207	22.2175	15.2356	0.665047	0.360399	21.5956	28.053	0.484099	0.345599	21.5956	15.513	0.42284	0.193919	25.3271	23.3718	0.801171	0.389586	25.3271	21.0348	0.706187	0.39458	28.4366	15.7111	0.702563	0.559574	28.4366	18.5429	0.787355	0.450684
22.3797	8.9835	0.543307	0.268584	22.3797	17.7588	0.669902	0.420085	21.7532	23.018	0.487632	0.283571	21.7532	26.5062	0.425925	0.331339	25.5119	31.1994	0.807017	0.520065	25.5119	21.8658	0.711339	0.410168	28.6442	12.0154	0.707692	0.427946	28.6442	20.0488	0.793103	0.487285
22.5419	9.7538	0.547245	0.291614	22.5419	12.7994	0.674758	0.30277	21.9109	26.4601	0.491167	0.325976	21.9109	29.6999	0.429013	0.371261	25.6968	29.8864	0.812866	0.498178	25.6968	28.9047	0.716495	0.542206	28.8517	13.6034	0.712819	0.484505	28.8517	18.4849	0.798849	0.449274
22.704	10.1614	0.55118	0.303801	22.704	12.1204	0.67961	0.286708	22.0685	25.1675	0.4947	0.310051	22.0685	30.6433	0.432099	0.383054	25.8817	21.6476	0.818715	0.360845	25.8817	26.5445	0.72165	0.497933	29.0593	11.4701	0.717948	0.408524	29.0593	24.1169	0.804597	0.58616
22.8662	14.1521	0.555118	0.423113	22.8662	12.2208	0.684465	0.289083	22.2261	24.2615	0.498232	0.29889	22.2261	27.7037	0.435185	0.346308	26.0665	24.1782	0.82456	0.403028	26.0665	18.153	0.726803	0.340522	29.2669	11.8462	0.723077	0.42192	29.2669	24.5577	0.810345	0.596873
23.0284	13.0322	0.559056	0.38963	23.0284	18.6094	0.68932	0.440206	22.3838	23.0279	0.501768	0.283693	22.3838	22.5761	0.438272	0.282211	26.2514	27.8169	0.830409	0.463681	26.2514	15.8247	0.731959	0.296846	29.4744	12.4786	0.728203	0.444444	29.4744	17.8955	0.81609	0.434949
23.1905	13.5592	0.562991	0.405386	23.1905	17.8304	0.694173	0.421779	22.5414	25.5449	0.5053	0.314701	22.5414	30.2373	0.441358	0.377979	26.4363	24.4838	0.836258	0.408122	26.4363	17.4127	0.737114	0.326635	29.682	14.6222	0.733333	0.520791	29.682	21.8441	0.821838	0.53092
23.3527	11.7573	0.566929	0.351514	23.3527	18.185	0.699028	0.430167	22.699	24.3534	0.508833	0.300022	22.699	34.5556	0.444444	0.43196	26.6211	29.7673	0.842104	0.496193	26.6211	14.3159	0.742267	0.268544	29.8896	15.5077	0.738462	0.552329	29.8896	19.654	0.827586	0.477689
23.5149	11.7361	0.570866	0.35088	23.5149	16.0699	0.703883	0.380134	22.8567	20.4947	0.512368	0.252485	22.8567	22.5137	0.447532	0.281431	26.806	34.9264	0.847953	0.58219	26.806	12.7003	0.747422	0.238238	30.0971	11.8889	0.743588	0.423441	30.0971	18.2222	0.833331	0.442889
23.6771	12.9412	0.574804	0.38691	23.6771	11.7491	0.708738	0.277925	23.0143	24.6798	0.515901	0.304043	23.0143	23.5665	0.450618	0.294591	26.9909	31.4946	0.853802	0.524985	26.9909	18.659	0.752578	0.350013	30.3047	10.4393	0.748717	0.371811	30.3047	16.4253	0.83908	0.399216
23.8392	16.9154	0.578739	0.505728	23.8392	15.8171	0.71359	0.374154	23.1719	19.6581	0.519434	0.242178	23.1719	28.3302	0.453703	0.354139	27.1758	32.5559	0.859651	0.542676	27.1758	21.3678	0.757733	0.400826	30.5123	6.9077	0.753846	0.246028	30.5123	16.4162	0.844828	0.398995
24.0014	16.4451	0.582677	0.491668	24.0014	14.6708	0.718446	0.347038	23.3296	19.258	0.522969	0.237249	23.3296	18.1619	0.456791	0.227031	27.3606	32.6082	0.865497	0.543548	27.3606	24.0853	0.762886	0.451802	30.7198	8.0786	0.758973	0.287731	30.7198	17.6912	0.850573	0.429984
24.1636	13.9205	0.586615	0.416188	24.1636	16.8243	0.723301	0.397979	23.4872	18.3072	0.526502	0.225536	23.4872	12.1663	0.459877	0.152084	27.5455	36.2939	0.871346	0.604985	27.5455	22.9228	0.768041	0.429995	30.9274	10.841	0.764102	0.386118	30.9274	22.6466	0.856321	0.550424
24.3258	12.3241	0.590552	0.36846	24.3258	14.054	0.728156	0.332448	23.6448	25.0905	0.530035	0.309103	23.6448	17.8025	0.462963	0.222539	27.7304	34.2982	0.877195	0.571719	27.7304	26.9326	0.773197	0.505213	31.135	9.6923	0.769231	0.345205	31.135	20.3948	0.862069	0.495694
24.4879	13.3396	0.594488	0.398821	24.4879	15.4656	0.733008	0.365839	23.8025	30.4729	0.53357	0.375411	23.8025	19.3457	0.46605	0.241829	27.9152	30.3244	0.88304	0.505479	27.9152	24.0853	0.77835	0.451802	31.3425	5.5658	0.774357	0.198234	31.3425	18.0499	0.867814	0.438702
24.6501	14.0942	0.598425	0.421382	24.6501	14.0544	0.737863	0.332457	23.9601	31.7474	0.537103	0.391113	23.9601	13.8395	0.469136	0.173	28.1001	29.7778	0.888889	0.496368	28.1001	26.8362	0.783505	0.503405	31.5501	10.3863	0.779486	0.369923	31.5501	23.4993	0.873562	0.571149
24.8123	13.5193	0.602363	0.404193	24.8123	15.726	0.742719	0.371999	24.1177	30.1943	0.540636	0.371979	24.1177	12.2222	0.472222	0.152783	28.285	38.9086	0.894738	0.64857	28.285	28.8017	0.788661	0.540274	31.7577	9.0154	0.784615	0.321097	31.7577	19.83	0.87931	0.481967
24.9744	14.191	0.606298	0.424276	24.9744	14.0271	0.747571	0.331812	24.2754	26.0913	0.544171	0.321432	24.2754	13.4252	0.47531	0.167821	28.4698	35.02	0.900584	0.58375	28.4698	32.9499	0.793813	0.618088	31.9652	11.0085	0.789742	0.392084	31.9652	21.6422	0.885056	0.526012
25.1366	14.3136	0.610236	0.427941	25.1366	15.5159	0.752426	0.367029	24.433	25.6783	0.547704	0.316344	24.433	13.6145	0.478396	0.170187	28.6547	34.4678	0.906433	0.574546	28.6547	31.8144	0.798969	0.596788	32.1728	10.7521	0.794871	0.382952	32.1728	22.8489	0.890804	0.555341
25.2988	13.3888	0.614174	0.400292	25.2988	17.2627	0.757281	0.40835	24.5906	19.9152	0.551236	0.245346	24.5906	12.0123	0.481481	0.150159	28.8396	35.4386	0.912282	0.590728	28.8396	26.3436	0.804124	0.494164	32.3804	12.8	0.8	0.455891	32.3804	28.8026	0.896552	0.700045
25.461	12.4288	0.618111	0.37159	25.461	17.1601	0.762137	0.405923	24.7483	16.8868	0.554771	0.208037	24.7483	11.0556	0.484569	0.1382	29.0244	38.2887	0.918128	0.638236	29.0244	23.4726	0.809277	0.440309	32.5879	12.3897	0.805127	0.441277	32.5879	26.4118	0.902297	0.641937
25.6231	14.0529	0.622047	0.420147	25.6231	17.7345	0.766989	0.41951	24.9059	14.1617	0.558304	0.174465	24.9059	10.8299	0.487655	0.135378	29.2093	39.3934	0.923977	0.656651	29.2093	26.7526	0.814433	0.501836	32.7955	10.3795	0.810256	0.369681	32.7955	26.1747	0.908045	0.636174
25.7853	16.4227	0.625984	0.490998	25.7853	16.631	0.771844	0.393407	25.0635	19.2069	0.561837	0.23662	25.0635	13.8056	0.490741	0.172576	29.3942	38.0868	0.929825	0.634871	29.3942	29.2319	0.819588	0.548344	33.0031	9.9846	0.815385	0.355616	33.0031	28.5707	0.913793	0.694409
25.9475	11.9067	0.629922	0.355981	25.9475	16.0733	0.776699	0.380214	25.2211	17.1977	0.56537	0.211867	25.2211	13.0384	0.493826	0.162986	29.579	35.1437	0.935671	0.585812	29.579	24.7919	0.824741	0.465057	33.2106	11.8974	0.820511	0.423743	33.2106	27.7104	0.919538	0.6735
26.1096	17.2385	0.633857	0.515388	26.1096	17.3307	0.781551	0.409958	25.3788	17.5665	0.568905	0.216411	25.3788	8.4417	0.496914	0.105525	29.7639	41.0172	0.94152	0.683718	29.7639	21.8799	0.829896	0.410432	33.4182	12.1299	0.82564	0.432024	33.4182	32.6895	0.925286	0.794516
26.2718	15.9395	0.637795	0.476551	26.2718	19.0805	0.786407	0.45135	25.5364	18.6557	0.572438	0.229829	25.5364	12	0.5	0.150005	29.9488	42.8947	0.947369	0.715014	29.9488	27.0283	0.835052	0.507008	33.6258	10.7846	0.830769	0.384109	33.6258	31.2176	0.931034	0.758742
26.434	20.5126	0.641733	0.613276	26.434	15.6139	0.791262	0.369347	25.694	18.1121	0.575971	0.223132	25.694	12.5453	0.503086	0.156822	30.1337	49.4297	0.953218	0.823946	30.1337	28.6491	0.840207	0.537412	33.8333	13.0034	0.835896	0.463135	33.8333	30.3173	0.93678	0.73686
26.5962	16.9012	0.64567	0.505304	26.5962	17.4757	0.796117	0.413388	25.8517	20.674	0.579506	0.254694	25.8517	16.8642	0.506174	0.21081	30.3185	42.5026	0.959064	0.708478	30.3185	31.692	0.84536	0.594492	34.0409	13.6855	0.841025	0.487429	34.0409	36.3431	0.942528	0.883317
26.7583	15.9357	0.649606	0.476438	26.7583	19.3315	0.800969	0.457287	26.0093	17.1597	0.583039	0.211399	26.0093	12.1142	0.509259	0.151433	30.5034	45.3749	0.964913	0.756357	30.5034	27.977	0.850516	0.524804	34.2485	13	0.846154	0.463014	34.2485	41.1439	0.948276	1
26.9205	11.4327	0.653543	0.341809	26.9205	22.0337	0.805824	0.521208	26.1669	18.9979	0.586572	0.234045	26.1669	12.3251	0.512345	0.154069	30.6883	46.6971	0.970762	0.778397	30.6883	24.3847	0.855671	0.457418	34.456	14.1009	0.85128	0.502224	34.456	40.4944	0.954021	0.984214
27.0827	17.1142	0.657481	0.511672	27.0827	14.8081	0.81068	0.350286	26.3246	17.9311	0.590107	0.220903	26.3246	18.083	0.515433	0.226045	30.8731	59.9914	0.976607	1	30.8731	25.6689	0.860824	0.481508	34.6636	14.9419	0.856409	0.532178	34.6636	36.5833	0.959769	0.889155
27.2448	13.5118	0.661416	0.403969	27.2448	18.6813	0.815532	0.441907	26.4822	17.7641	0.59364	0.218845	26.4822	24.5062	0.518519	0.306338	31.058	59.4995	0.982456	0.9918	31.058	36.113	0.865979	0.677423	34.8712	14.5077	0.861538	0.516713	34.8712	31.7967	0.965517	0.772817
27.407	9.2839	0.665354	0.277566	27.407	19.392	0.820387	0.458718	26.6398	16.7314	0.597172	0.206123	26.6398	33.9359	0.521604	0.424213	31.2429	57.1468	0.988305	0.952583	31.2429	32.7981	0.871135	0.61524	35.0787	16.9111	0.866665	0.602314	35.0787	32.3205	0.971263	0.785548
27.5692	11.0402	0.669292	0.330075	27.5692	20.6364	0.825242	0.488155	26.7975	18.0186	0.600707	0.22198	26.7975	35.62	0.524692	0.445265	31.4277	49.113	0.994151	0.818667	31.4277	24.0543	0.876287	0.451221	35.2863	14.3846	0.871794	0.512329	35.2863	35.3341	0.977011	0.858793
27.7314	16.6301	0.673229	0.497199	27.7314	15.4948	0.830098	0.36653	26.9551	19.1985	0.60424	0.236516	26.9551	36.2778	0.527778	0.453488	31.6126	46	1	0.766777	31.6126	25.8041	0.881443	0.484044	35.4939	14.7077	0.876923	0.523836	35.4939	30.3912	0.982759	0.738656
27.8935	16.5868	0.677165	0.495904	27.8935	16.845	0.83495	0.398469	27.1127	21.7893	0.607773	0.268434	27.1127	30.2963	0.530864	0.378717					31.7975	32.7014	0.886598	0.613427	35.7014	14.3624	0.88205	0.511538	35.7014	26.1149	0.988504	0.634721
28.0557	14.0182	0.681102	0.419109	28.0557	15.9107	0.839805	0.376368	27.2704	23.1983	0.611308	0.285792	27.2704	26.6481	0.533952	0.333112					31.9823	30.3847	0.891751	0.569969	35.909	15.6957	0.887179	0.559025	35.909	25.4043	0.994252	0.61745
28.2179	16.9148	0.68504	0.50571	28.2179	18.0169	0.84466	0.42619	27.428	21.6957	0.614841	0.267281	27.428	23.8519	0.537037	0.298159					32.1672	27.3112	0.896907	0.512315	36.1166	11.9692	0.892308	0.426301	36.1166	24	1	0.583319
28.38	16.1541	0.688975	0.482967	28.38	20.0485	0.849512	0.474248	27.5856	23.0371	0.618374	0.283806	27.5856	26.9211	0.540123	0.336525					32.3521	31.6581	0.902062	0.593856	36.3241	9.2393	0.897434	0.329071
28.5422	14.0064	0.692913	0.418757	28.5422	22.9449	0.854368	0.542762	27.7433	31.5018	0.621909	0.388087	27.7433	27.3909	0.543211	0.342398					32.537	29.9278	0.907218	0.561398	36.5317	12.1641	0.902563	0.433242
28.7044	14.7468	0.696851	0.440893	28.7044	20.7723	0.859223	0.491369	27.9009	23.7622	0.625442	0.292739	27.9009	23.1852	0.546297	0.289825					32.7218	33.0937	0.91237	0.620785	36.7393	11.1385	0.907692	0.396714
28.8666	9.4896	0.700789	0.283715	28.8666	19.6312	0.864078	0.464377	28.0585	23.963	0.628975	0.295213	28.0585	20.1509	0.549382	0.251895					32.9067	33.7324	0.917526	0.632766	36.9468	14.7521	0.912819	0.525418
29.0287	8.8324	0.704724	0.264067	29.0287	17.8366	0.86893	0.421925	28.2162	23.8476	0.63251	0.293791	28.2162	25.6142	0.55247	0.320188					33.0916	38.6923	0.922681	0.725806	37.1544	12.1829	0.917948	0.433912
29.1909	11.6605	0.708661	0.34862	29.1909	22.4773	0.873785	0.531701	28.3738	20.6049	0.636043	0.253842	28.3738	25.8889	0.555556	0.323622					33.2764	40.9821	0.927834	0.768759	37.362	12.2308	0.923077	0.435618
29.3531	12.8784	0.712599	0.385032	29.3531	23.8697	0.878641	0.564639	28.5314	20.9942	0.639576	0.258638	28.5314	21.3543	0.558642	0.266938					33.4613	37.2957	0.93299	0.699608	37.5695	8.3538	0.928203	0.297533
29.5152	14.5014	0.716534	0.433556	29.5152	22.2225	0.883493	0.525674	28.6891	17.7175	0.643111	0.218271	28.6891	16.3114	0.56173	0.203899					33.6462	37.7742	0.938145	0.708584	37.7771	12.8667	0.933333	0.458266
29.6774	12.5697	0.720472	0.375803	29.6774	18.7492	0.888348	0.443513	28.8467	23.3496	0.646643	0.287656	28.8467	18.1142	0.564815	0.226435					33.831	40.5334	0.943298	0.760342	37.9847	13.9538	0.938462	0.496985
29.8396	11.6522	0.72441	0.348372	29.8396	20.4675	0.893203	0.484159	29.0043	20.8768	0.650176	0.257192	29.0043	21.0014	0.567901	0.262526					34.0159	47.9859	0.948453	0.90014	38.1922	14.2769	0.943588	0.508493
30.0018	20.7751	0.728348	0.621124	30.0018	19.0034	0.898059	0.449526	29.162	21.4146	0.653711	0.263818	29.162	17.5209	0.570989	0.219019					34.2008	49.6788	0.953609	0.931896	38.3998	17.4701	0.948717	0.622223
30.1639	15.7137	0.732283	0.469801	30.1639	20.9616	0.902911	0.495847	29.3196	24.0189	0.657244	0.295901	29.3196	15.0617	0.574075	0.188278					34.3856	51.7169	0.958762	0.970127	38.6074	17.1538	0.953846	0.610958
30.3261	15.2697	0.73622	0.456526	30.3261	23.9329	0.907766	0.566134	29.4772	22.0598	0.660777	0.271766	29.4772	15.1372	0.57716	0.189221					34.5705	52.7095	0.963917	0.988747	38.8149	21.3026	0.958973	0.758723
30.4883	27.7284	0.740158	0.82901	30.4883	22.8148	0.912621	0.539685	29.6349	21.4337	0.664312	0.264053	29.6349	15.3772	0.580248	0.192221					34.7554	49.9111	0.969073	0.936253	39.0225	22.6188	0.964102	0.805602
30.6504	17.1402	0.744093	0.512449	30.6504	25.889	0.917473	0.612405	29.7925	26.0713	0.667845	0.321186	29.7925	16.3333	0.583334	0.204173					34.9403	53.3094	0.974228	1	39.2301	21.1692	0.969231	0.753972
30.8126	16.0414	0.748031	0.479598	30.8126	25.3326	0.922329	0.599244	29.9501	19.8506	0.671378	0.24455	29.9501	21.5405	0.58642	0.269265					35.1251	51.5142	0.979381	0.966325	39.4376	20.8034	0.974357	0.740944
30.9748	13.3622	0.751969	0.399497	30.9748	23.6248	0.927184	0.558845	30.1077	17.9547	0.674911	0.221193	30.1077	25.6749	0.589506	0.320947					35.31	41.5773	0.984536	0.779924	39.6452	22.7966	0.979486	0.811934
31.137	10.9344	0.755907	0.326911	31.137	24.1466	0.932039	0.571189	30.2654	18.8828	0.678446	0.232627	30.2654	25.9753	0.592593	0.324702					35.4949	29.6636	0.989692	0.556442	39.8528	28.0769	0.984615	1
31.2991	13.9087	0.759842	0.415836	31.2991	22.9223	0.936891	0.542228	30.423	19.4689	0.681979	0.239847	30.423	21.7613	0.595679	0.272025					35.6797	17.274	0.994844	0.324033	40.0603	20.5214	0.989742	0.7309
31.4613	16.0904	0.76378	0.481063	31.4613	23.5065	0.941746	0.556047	30.5806	15.3259	0.685512	0.188808	30.5806	23.2538	0.598765	0.290682					35.8646	5	1	0.0937921	40.2679	17.7299	0.994871	0.631476
31.6235	14.1106	0.767717	0.421872	31.6235	23.4608	0.946602	0.554966	30.7383	22.2794	0.689047	0.274471	30.7383	18.4691	0.601853	0.230872									40.4755	10	1	0.356165
31.7856	16.9781	0.771652	0.507603	31.7856	28.5401	0.951454	0.675117	30.8959	22.6073	0.692579	0.278511	30.8959	16.4582	0.604938	0.205734
31.9478	17.6106	0.77559	0.526513	31.9478	30.2048	0.956309	0.714496	31.0535	21.5117	0.696112	0.265014	31.0535	22.1533	0.608024	0.276926
32.11	14.5669	0.779528	0.435514	32.11	34.0074	0.961164	0.804446	31.2112	24.9475	0.699647	0.307341	31.2112	18.4444	0.611112	0.230563
32.2722	16.684	0.783466	0.49881	32.2722	31.6058	0.96602	0.747636	31.3688	23.7317	0.70318	0.292363	31.3688	18.6475	0.614198	0.233102
32.4343	17.8353	0.787401	0.533231	32.4343	36.9432	0.970872	0.873893	31.5264	17.6336	0.706713	0.217237	31.5264	21.3759	0.617284	0.267208
32.5965	10.966	0.791339	0.327856	32.5965	36.6374	0.975727	0.866659	31.6841	14.9611	0.710248	0.184314	31.6841	19.7716	0.620371	0.247153
32.7587	13.2279	0.795276	0.395481	32.7587	42.2743	0.980582	1	31.8417	14.1201	0.713781	0.173953	31.8417	17.9438	0.623457	0.224305
32.9208	13.6535	0.799211	0.408206	32.9208	40.1725	0.985434	0.950282	31.9993	15.09	0.717314	0.185902	31.9993	14.8913	0.626543	0.186148
33.083	13.3257	0.803149	0.398405	33.083	37.5994	0.99029	0.889415	32.157	16.9408	0.720849	0.208703	32.157	13.6667	0.629631	0.17084
33.2452	13.2827	0.807087	0.39712	33.2452	38.8287	0.995145	0.918494	32.3146	18.1015	0.724382	0.223002	32.3146	15.4335	0.632716	0.192925
33.4074	14.9516	0.811025	0.447016	33.4074	40	1	0.946201	32.4722	16.8139	0.727915	0.207139	32.4722	17.3045	0.635802	0.216314
33.5695	10.6755	0.81496	0.319171					32.6299	16.5239	0.73145	0.203567	32.6299	21.0278	0.63889	0.262856
33.7317	10.6616	0.818898	0.318755					32.7875	15.8155	0.734983	0.194839	32.7875	22.6063	0.641976	0.282588
33.8939	11.3167	0.822835	0.338341					32.9451	18.222	0.738515	0.224486	32.9451	25.9424	0.645062	0.324291
34.056	14.2924	0.826771	0.427307					33.1028	20.101	0.742051	0.247635	33.1028	23.1111	0.648149	0.288899
34.2182	12.972	0.830708	0.387831					33.2604	16.9627	0.745583	0.208972	33.2604	24.0429	0.651235	0.300546
34.3804	13.08	0.834646	0.391059					33.418	17.4631	0.749116	0.215137	33.418	22.93	0.654321	0.286635
34.5426	16.8916	0.838584	0.505017					33.5757	27.0339	0.752651	0.333045	33.5757	25.8117	0.657409	0.322657
34.7047	17.2165	0.842519	0.514731					33.7333	23.1488	0.756184	0.285182	33.7333	17.1838	0.660494	0.214805
34.8669	14.6697	0.846457	0.438588					33.8909	23.112	0.759717	0.284729	33.8909	22.0415	0.66358	0.275528
35.0291	16.0092	0.850394	0.478635					34.0486	24.2225	0.763252	0.29841	34.0486	18.3333	0.666668	0.229174
35.1912	17.1322	0.85433	0.51221					34.2062	23.5159	0.766785	0.289705	34.2062	21.965	0.669754	0.274572
35.3534	18.4074	0.858267	0.550335					34.3638	23.045	0.770318	0.283903	34.3638	20.2524	0.67284	0.253164
35.5156	16.0905	0.862205	0.481066					34.5215	24.2341	0.773853	0.298552	34.5215	20.4259	0.675927	0.255332
35.6778	13.656	0.866143	0.40828					34.6791	28.8621	0.777386	0.355567	34.6791	16.3704	0.679013	0.204637
35.8399	12.5827	0.870078	0.376191					34.8367	26.2515	0.780919	0.323406	34.8367	22.8687	0.682099	0.285868
36.0021	11.5628	0.874016	0.345699					34.9943	23.8271	0.784451	0.293538	34.9943	19.8889	0.685185	0.24862
36.1643	18.0596	0.877953	0.539937					35.152	27.6454	0.787987	0.340578	35.152	18.5874	0.688272	0.23235
36.3265	14.5282	0.881891	0.434357					35.3096	34.2247	0.791519	0.421632	35.3096	20.4198	0.691358	0.255256
36.4886	14.3956	0.885826	0.430393					35.4672	29.774	0.795052	0.366801	35.4672	19.5833	0.694444	0.2448
36.6508	16.1568	0.889764	0.483048					35.6249	27.9576	0.798587	0.344424	35.6249	24.7723	0.697532	0.309664
36.813	14.7361	0.893702	0.440573					35.7825	27.4758	0.80212	0.338489	35.7825	29.7428	0.700618	0.371798
36.9751	16.9397	0.897637	0.506455					35.9401	20.8144	0.805653	0.256423	35.9401	23.4444	0.703703	0.293065
37.1373	18.3716	0.901575	0.549265					36.0978	22.3065	0.809188	0.274805	36.0978	27.3265	0.706791	0.341593
37.2995	19.7475	0.905512	0.590401					36.2554	21.8994	0.812721	0.26979	36.2554	26.4047	0.709877	0.33007
37.4617	18.9967	0.90945	0.567954					36.413	22.8155	0.816254	0.281076	36.413	19.392	0.712963	0.242408
37.6238	21.8354	0.913385	0.652824					36.5707	27.7892	0.819789	0.34235	36.5707	22.4664	0.71605	0.280839
37.786	18.1533	0.917323	0.542738					36.7283	28.0507	0.823322	0.345571	36.7283	22.9516	0.719136	0.286905
37.9482	19.4195	0.921261	0.580595					36.8859	25.9342	0.826855	0.319497	36.8859	21.8889	0.722222	0.27362
38.1103	18.4399	0.925196	0.551307					37.0436	25.3021	0.83039	0.31171	37.0436	16.3488	0.72531	0.204367
38.2725	20.4127	0.929134	0.610289					37.2012	27.1943	0.833923	0.335021	37.2012	23.775	0.728396	0.297198
38.4347	18.3866	0.933071	0.549714					37.3588	28.209	0.837455	0.347521	37.3588	24.8858	0.731481	0.311083
38.5969	17.4406	0.937009	0.521431					37.5165	26.9454	0.84099	0.331954	37.5165	30.273	0.734569	0.378425
38.759	17.1641	0.940944	0.513164					37.6741	24.0661	0.844523	0.296483	37.6741	27.8707	0.737655	0.348396
38.9212	17.6772	0.944882	0.528504					37.8317	26.61	0.848056	0.327822	37.8317	27.9383	0.740741	0.349241
39.0834	21.7717	0.94882	0.65092					37.9894	24.9538	0.851591	0.307419	37.9894	30.404	0.743828	0.380063
39.2455	20.7186	0.952755	0.619435					38.147	21.5577	0.855124	0.26558	38.147	31.7503	0.746914	0.396892
39.4077	20.9533	0.956693	0.626452					38.3046	18.0621	0.858657	0.222516	38.3046	30.5	0.75	0.381263
39.5699	18.9604	0.96063	0.566869					38.4623	19.7167	0.862192	0.2429	38.4623	29.3032	0.753088	0.366302
39.7321	23.4638	0.964568	0.701509					38.6199	20.1625	0.865725	0.248392	38.6199	30.5765	0.756174	0.382219
39.8942	24.3208	0.968503	0.727131					38.7775	21.053	0.869258	0.259363	38.7775	31.4568	0.759259	0.393223
40.0564	28.553	0.972441	0.853664					38.9352	27.6744	0.872793	0.340935	38.9352	25.0861	0.762347	0.313587
40.2186	33.4476	0.976379	1					39.0928	30.0209	0.876326	0.369843	39.0928	29.3278	0.765433	0.36661
40.3807	32.4536	0.980314	0.970282					39.2504	34.6342	0.879859	0.426677	39.2504	24.5895	0.768519	0.307379
40.5429	25.6452	0.984252	0.766728					39.408	39.9179	0.883391	0.491769	39.408	29.0631	0.771604	0.363301
40.7051	25.4162	0.988189	0.759881					39.5657	33.0517	0.886926	0.407181	39.5657	19.9259	0.774692	0.249082
40.8673	21.2763	0.992127	0.636108					39.7233	33.4096	0.890459	0.41159	39.7233	25.6667	0.777778	0.320845
41.0294	19.6462	0.996062	0.587372					39.8809	30.5681	0.893992	0.376584	39.8809	25.6883	0.780864	0.321115
41.1916	26	1	0.777335					40.0386	33.3516	0.897527	0.410876	40.0386	24.2044	0.783952	0.302565
								40.1962	36.7345	0.90106	0.452551	40.1962	21.5648	0.787037	0.269569
								40.3538	37.1399	0.904593	0.457546	40.3538	27.3731	0.790123	0.342175
								40.5115	34.2575	0.908128	0.422036	40.5115	31.1855	0.793211	0.389832
								40.6691	37.5629	0.911661	0.462757	40.6691	26.1111	0.796297	0.3264
								40.8267	44.1179	0.915194	0.543511	40.8267	25.7325	0.799382	0.321667
								40.9844	39.636	0.918729	0.488296	40.9844	24.2743	0.80247	0.303439
								41.142	35.2265	0.922262	0.433974	41.142	23.4722	0.805556	0.293412
								41.2996	40.8246	0.925794	0.502939	41.2996	23.2414	0.808642	0.290527
								41.4573	46.4121	0.92933	0.571775	41.4573	21.8731	0.81173	0.273423
								41.6149	51.8796	0.932862	0.639132	41.6149	22.7037	0.814815	0.283806
								41.7725	49.4488	0.936395	0.609185	41.7725	25.0326	0.817901	0.312918
								41.9302	47.9476	0.93993	0.590691	41.9302	21.4993	0.820989	0.26875
								42.0878	48.2209	0.943463	0.594058	42.0878	21.8086	0.824075	0.272617
								42.2454	47.1425	0.946996	0.580773	42.2454	20.9026	0.82716	0.261291
								42.4031	52.1483	0.950531	0.642442	42.4031	35.1176	0.830248	0.438985
								42.5607	55.5016	0.954064	0.683753	42.5607	24.3333	0.833334	0.304177
								42.7183	54.3509	0.957597	0.669577	42.7183	28.5669	0.83642	0.357098
								42.876	53.2898	0.961132	0.656505	42.876	25.7668	0.839508	0.322096
								43.0336	56.2706	0.964665	0.693227	43.0336	22.6451	0.842593	0.283073
								43.1912	59.9664	0.968198	0.738757	43.1912	16.1811	0.845679	0.202271
								43.3489	64.2038	0.971733	0.79096	43.3489	28.546	0.848767	0.356837
								43.5065	62.0339	0.975266	0.764228	43.5065	33.3704	0.851853	0.417144
								43.6641	65.6985	0.978798	0.809374	43.6641	29.845	0.854938	0.373075
								43.8217	81.172	0.982331	1	43.8217	27.797	0.858024	0.347474
								43.9794	68.5886	0.985866	0.844979	43.9794	29.2778	0.861112	0.365985
								44.137	61.4405	0.989399	0.756917	44.137	28.6516	0.864198	0.358157
								44.2946	64.2657	0.992932	0.791723	44.2946	36.37	0.867284	0.45464
								44.4523	67.9136	0.996467	0.836663	44.4523	29.7531	0.870371	0.371926
								44.6099	61	1	0.751491	44.6099	23.857	0.873457	0.298223
												44.7675	21.0864	0.876543	0.263589
												44.9252	14.1667	0.879631	0.17709
												45.0828	15.0754	0.882716	0.188449
												45.2404	18.9798	0.885802	0.237256
												45.3981	20.8889	0.88889	0.26112
												45.5557	20.7459	0.891976	0.259333
												45.7133	27.0165	0.895062	0.337718
												45.871	20.3796	0.898149	0.254754
												46.0286	22.4733	0.901235	0.280926
												46.1862	18.2195	0.904321	0.227751
												46.3439	18.9012	0.907409	0.236273
												46.5015	18.5525	0.910494	0.231914
												46.6591	20.3347	0.91358	0.254192
												46.8168	20.8333	0.916668	0.260425
												46.9744	19.1262	0.919754	0.239086
												47.132	20.2599	0.92284	0.253257
												47.2897	19.9136	0.925927	0.248928
												47.4473	18.548	0.929013	0.231858
												47.6049	12.6571	0.932099	0.158219
												47.7626	15.9259	0.935187	0.19908
												47.9202	20.6776	0.938272	0.258479
												48.0778	26.5864	0.941358	0.332341
												48.2354	22.1111	0.944444	0.276398
												48.3931	26.263	0.947532	0.328299
												48.5507	41.8368	0.950618	0.522978
												48.7083	39.6574	0.953703	0.495734
												48.866	45.048	0.956791	0.563119
												49.0236	50.1701	0.959877	0.627147
												49.1812	46.9753	0.962963	0.587211
												49.3389	49.6893	0.96605	0.621137
												49.4965	54.1125	0.969136	0.676429
												49.6541	55.2778	0.972222	0.690996
												49.8118	58.7709	0.97531	0.734661
												49.9694	64.8484	0.978396	0.810632
												50.127	67.9877	0.981481	0.849875
												50.2847	66.7164	0.984569	0.833983
												50.4423	67.0562	0.987655	0.838231
												50.5999	72.3549	0.990741	0.904467
												50.7576	79.9973	0.993828	1
												50.9152	69.2023	0.996914	0.865058
												51.0728	70	1	0.87503

## Sheet: 32-cells
1								2												3								4								5
X	Y			X	Y			X	Y			X	Y			X	Y			X	Y			X	Y			X	Y			X	Y			X	Y			X	Y
0	28	0	0.314607	0	12	0	0.172255	0	36	0	0.697289	0	8	0	0.127835	0	8	0	0.121005	0	44	0	0.686092	0	31	0	0.561102	0	20	0	0.348988	0	45	0	0.767854	0	23	0	0.331532	0	16	0	0.349814
0.1622	37.1457	0.00568281	0.417367	0.1622	23.7471	0.00518226	0.340881	0.1622	38.4078	0.00543573	0.743926	0.1622	18.7391	0.00361074	0.299439	0.1622	14.825	0.00467372	0.224238	0.1667	44.1954	0.00606021	0.689139	0.1667	32.6851	0.00628888	0.591603	0.2303	31.5828	0.00699411	0.551101	0.2303	44.4568	0.00617382	0.758585	0.1803	31.2844	0.00624898	0.450946	0.1803	23.9435	0.00709103	0.523486
0.3243	46.8058	0.0113621	0.525908	0.3243	32.8045	0.0103613	0.470896	0.3243	35.5974	0.0108681	0.689491	0.3243	16.6836	0.00721924	0.266594	0.3243	26.1301	0.00934456	0.395235	0.3334	37.9333	0.0121204	0.591494	0.3334	29.6626	0.0125778	0.536895	0.4605	43.9262	0.0139852	0.766487	0.4605	47.0988	0.012345	0.803667	0.3607	30.25	0.0125014	0.436036	0.3607	24.0026	0.014186	0.524778
0.4865	47.0439	0.0170449	0.528583	0.4865	36.8495	0.0155436	0.52896	0.4865	33.1588	0.0163038	0.642258	0.4865	19.2479	0.01083	0.30757	0.4865	39.907	0.0140183	0.60362	0.5001	41.1183	0.0181806	0.641158	0.5001	32.5208	0.0188666	0.588629	0.6908	39.3716	0.0209793	0.687012	0.6908	47.1481	0.0185188	0.804508	0.541	38.6594	0.0187504	0.557253	0.541	28.2784	0.021277	0.618261
0.6487	49.8099	0.0227278	0.559662	0.6487	43.9099	0.0207258	0.63031	0.6487	36.1248	0.0217396	0.699707	0.6487	25.3029	0.0144407	0.404325	0.6487	52.953	0.018692	0.800949	0.6668	43.612	0.0242408	0.680042	0.6668	40.9579	0.0251555	0.741341	0.9211	45.2302	0.0279734	0.789241	0.9211	39.7901	0.0246926	0.678955	0.7213	36.3	0.0249994	0.523243	0.7213	28.5599	0.028368	0.624416
0.8109	46.6777	0.0284106	0.524469	0.8109	41.7446	0.0259081	0.599228	0.8109	33.3133	0.0271753	0.64525	0.8109	28.0832	0.0180514	0.448752	0.8109	49.7788	0.0233657	0.752937	0.8336	46.6667	0.0303047	0.727674	0.8336	30.6588	0.0314482	0.554926	1.1513	29.7637	0.0349645	0.519359	1.1513	43.2716	0.0308637	0.738361	0.9016	38.0625	0.0312484	0.548649	0.9016	31.3314	0.0354591	0.68501
0.973	37.4339	0.0340899	0.420606	0.973	42.0546	0.0310872	0.603678	0.973	35.5142	0.0326077	0.68788	0.973	23.9201	0.02166	0.382229	0.973	46.8717	0.0280365	0.708966	1.0003	46.7659	0.0363649	0.729221	1.0003	25.9373	0.0377371	0.469467	1.3816	35.2284	0.0419586	0.614715	1.3816	37.0741	0.0370375	0.632611	1.082	35.7875	0.0375008	0.515856	1.082	29.4269	0.042554	0.643371
1.1352	51.0408	0.0397727	0.573492	1.1352	44.8732	0.0362694	0.644138	1.1352	33.732	0.0380434	0.65336	1.1352	25.0418	0.0252707	0.400153	1.1352	52.1387	0.0327103	0.788632	1.167	38.4656	0.0424251	0.599794	1.167	27.935	0.0440259	0.505626	1.6118	38.8719	0.0489497	0.678292	1.6118	35.3086	0.0432087	0.602485	1.2623	35.8	0.0437498	0.516036	1.2623	29.266	0.0496451	0.639853
1.2974	43.0083	0.0454555	0.483239	1.2974	46.9502	0.0414517	0.673952	1.2974	35.2892	0.0434791	0.683522	1.2974	24.6498	0.0288814	0.393889	1.2974	48.8602	0.037384	0.739043	1.3337	38.0502	0.0484853	0.593317	1.3337	32.7833	0.0503148	0.59338	1.8421	31.6722	0.0559438	0.552661	1.8421	34.1605	0.0493825	0.582895	1.4426	37.1	0.0499988	0.534775	1.4426	27.0582	0.0567361	0.591583
1.4595	41.1994	0.0511348	0.462915	1.4595	46.9541	0.0466307	0.674008	1.4595	33.3658	0.0489115	0.646267	1.4595	24.8897	0.0324899	0.397722	1.4595	45.3401	0.0420548	0.685799	1.5004	38.1157	0.0545455	0.594338	1.5004	19.7063	0.0566037	0.356685	2.0724	34.8278	0.0629379	0.607725	2.0724	32.1111	0.0555563	0.547925	1.623	38.1063	0.0562512	0.54928	1.623	22.8692	0.063831	0.499998
1.6217	46.1983	0.0568176	0.519082	1.6217	39.7397	0.051813	0.570448	1.6217	33.0964	0.0543472	0.641049	1.6217	33.4022	0.0361007	0.533747	1.6217	50.3081	0.0467285	0.760943	1.6671	41.5225	0.0606057	0.647461	1.6671	26.5874	0.0628926	0.481234	2.3026	31.8218	0.069929	0.555272	2.3026	35.5802	0.0617274	0.60712	1.8033	36.375	0.0625002	0.524324	1.8033	25.6894	0.0709221	0.561657
1.7839	51.6875	0.0625004	0.580758	1.7839	36.0341	0.0569952	0.517256	1.7839	36.224	0.059783	0.701628	1.7839	40.7362	0.0397114	0.65094	1.7839	47.3744	0.0514023	0.716569	1.8338	39.9733	0.0666659	0.623304	1.8338	31.0225	0.0691815	0.561509	2.5329	30.2189	0.0769231	0.527302	2.5329	33.2593	0.0679013	0.567517	1.9836	27.6656	0.0687492	0.398783	1.9836	21.9446	0.0780131	0.479783
1.9461	39.5826	0.0681833	0.444748	1.9461	41.7971	0.0621775	0.599981	1.9461	31.6786	0.0652187	0.613587	1.9461	34.3215	0.0433221	0.548437	1.9461	42.2734	0.056076	0.639413	2.0005	45.6364	0.0727261	0.711609	2.0005	21.5112	0.0754703	0.389354	2.7632	29.2774	0.0839172	0.510874	2.7632	35.963	0.0740751	0.613652	2.164	25.45	0.0750016	0.366847	2.164	22.6243	0.0851081	0.494643
2.1082	41.6219	0.0738626	0.467662	2.1082	39.5935	0.0673566	0.56835	2.1082	27.8634	0.0706511	0.53969	2.1082	38.6418	0.0469307	0.617473	2.1082	44.4096	0.0607468	0.671725	2.1672	50.473	0.0787864	0.787026	2.1672	21.6726	0.0817592	0.392276	2.9934	38.719	0.0909083	0.675624	2.9934	35.9383	0.0802462	0.61323	2.3443	31.3813	0.0812506	0.452343	2.3443	21.0816	0.0921991	0.460915
2.2704	38.2831	0.0795454	0.430147	2.2704	35.8845	0.0725388	0.515108	2.2704	27.1106	0.0760868	0.525109	2.2704	28.6842	0.0505414	0.458356	2.2704	43.1844	0.0654205	0.653193	2.334	50.8401	0.0848502	0.79275	2.334	23.3655	0.0880519	0.422917	3.2237	20.6087	0.0979024	0.35961	3.2237	31.3951	0.08642	0.535708	2.5246	24.4375	0.0874996	0.352252	2.5246	17.6778	0.0992901	0.386496
2.4326	47.6033	0.0852282	0.534869	2.4326	38.4414	0.0777211	0.551812	2.4326	30.9546	0.0815225	0.599564	2.4326	27.9871	0.0541521	0.447217	2.4326	46.1286	0.0700943	0.697726	2.5007	51.6694	0.0909104	0.805681	2.5007	35.6145	0.0943408	0.644625	3.454	37.0372	0.104896	0.646278	3.454	26.5926	0.0925938	0.453761	2.7049	22.2031	0.0937486	0.320045	2.7049	23.4319	0.106381	0.5123
2.5947	42.9917	0.0909075	0.483053	2.5947	40.1224	0.0829001	0.575942	2.5947	34.0907	0.0869549	0.660308	2.5947	33.2199	0.0577606	0.530834	2.5947	47.4371	0.0747651	0.717518	2.6674	40.9297	0.0969706	0.638217	2.6674	23.6327	0.10063	0.427754	3.6842	37.0958	0.111888	0.6473	3.6842	36	0.098765	0.614283	2.8853	25.6	0.100001	0.369009	2.8853	24.8327	0.113476	0.542927
2.7569	37.5496	0.0965903	0.421906	2.7569	41.6248	0.0880824	0.597508	2.7569	32.5118	0.0923906	0.629726	2.7569	25.156	0.0613714	0.401978	2.7569	32.376	0.0794388	0.489708	2.8341	40.6576	0.103031	0.633974	2.8341	22.0812	0.106919	0.399671	3.9145	39.4735	0.118882	0.68879	3.9145	25.9753	0.104939	0.443227	3.0656	20.7938	0.10625	0.29973	3.0656	17.8268	0.120567	0.389754
2.9191	44.1405	0.102273	0.495961	2.9191	33.1619	0.0932647	0.476026	2.9191	29.725	0.0978264	0.575748	2.9191	24.2069	0.0649821	0.386812	2.9191	42.3318	0.0841125	0.640297	3.0008	39.2215	0.109091	0.611581	3.0008	21.9438	0.113207	0.397184	4.1447	19.047	0.125873	0.332359	4.1447	27.8889	0.11111	0.47588	3.2459	17.05	0.112499	0.245766	3.2459	16.8687	0.127658	0.368807
3.0813	42.9349	0.107956	0.482415	3.0813	33.9669	0.0984469	0.487582	3.0813	29.0416	0.103262	0.562511	3.0813	28.2661	0.0685928	0.451675	3.0813	43.2999	0.0887862	0.65494	3.1675	37.7165	0.115151	0.588114	3.1675	23.9817	0.119496	0.43407	4.375	31.7167	0.132867	0.553438	4.375	30.0617	0.117284	0.512955	3.4263	14.3438	0.118751	0.206757	3.4263	26.6101	0.134753	0.581786
[truncated: 258 more rows]

## Sheet: 60-cells
1												2																3								4								5
[truncated: 201 more rows]
[truncated: 2 more columns]

## Sheet: 3hpf
1								2								3								4								5
[truncated: 150 more rows]

## Sheet: 4hpf
1								2								3								4								5								6								7
[truncated: 103 more rows]
[truncated: 6 more columns]

[truncated: 7 more sheets: 5hpf, 6hpf, 7hpf, 8hpf, 9hpf, 10 hpf, 11hpf]
