# Supplementary material for: Par protein localization during the early development of Mnemiopsis leidyi suggests different modes of epithelial organization in the metazoa
Source: eLife. 2020 Jul 27;9:e54927. doi: 10.7554/eLife.54927 (PMC7441587; doi:10.7554/eLife.54927)
Supplement: Figure 2—figure supplement 11—source data 1. [file elife-54927-fig2-figsupp11-data1.xlsx]

## Sheet: 1st cleavage
Embryo 1				Embryo 2
X	Y			X	Y
0	30.875	0	0.737629	0	32	0	0.549755
0.1486	31.3036	0.00288275	0.747868	0.2076	32.8913	0.00337892	0.565067
0.2971	32.75	0.00576356	0.782424	0.4151	35.0026	0.00675622	0.601339
0.4457	31.5179	0.00864631	0.752988	0.6227	33.4122	0.0101351	0.574016
0.5942	31.9464	0.0115271	0.763225	0.8303	43.4828	0.0135141	0.747027
0.7428	32.3929	0.0144099	0.773893	1.0378	32.2787	0.0168914	0.554543
0.8913	32.6429	0.0172907	0.779865	1.2454	29.6337	0.0202703	0.509102
1.0399	33.0179	0.0201734	0.788824	1.453	30.5829	0.0236492	0.525409
1.1884	33.125	0.0230542	0.791383	1.6605	26.4193	0.0270265	0.453879
1.337	32.9464	0.025937	0.787116	1.8681	24.4847	0.0304054	0.420643
1.4855	33.3393	0.0288178	0.796503	2.0757	30.8101	0.0337843	0.529312
1.6341	32.875	0.0317006	0.78541	2.2832	20.6552	0.0371616	0.354853
1.7826	32.9286	0.0345814	0.786691	2.4908	17.7443	0.0405406	0.304844
1.9312	32.9643	0.0374641	0.787544	2.6984	26.2277	0.0439195	0.450587
2.0797	32.3036	0.0403449	0.771759	2.9059	34.6326	0.0472968	0.594982
2.2283	32.3929	0.0432277	0.773893	3.1135	38.1903	0.0506757	0.656103		Middle point = cell-cell contacts
2.3769	32.5536	0.0461104	0.777732	3.3211	23.3316	0.0540546	0.400833
2.5254	32.7679	0.0489912	0.782852	3.5286	20.5592	0.0574319	0.353204
2.674	33.2679	0.051874	0.794797	3.7362	23.8985	0.0608108	0.410572
2.8225	33.1071	0.0547548	0.790955	3.9438	24.6642	0.0641898	0.423727
2.9711	33.2143	0.0576375	0.793517	4.1513	21.5106	0.0675671	0.369548
3.1196	32.4821	0.0605184	0.776024	4.3589	17.8957	0.070946	0.307445
3.2682	32.3214	0.0634011	0.772184	4.5665	18.3948	0.0743249	0.31602
3.4167	32.5536	0.0662819	0.777732	4.774	29.9271	0.0777022	0.514142
3.5653	33.1429	0.0691647	0.791811	4.9816	34.8298	0.0810811	0.59837
3.7138	34.1071	0.0720455	0.814846	5.1892	34.0168	0.08446	0.584403
3.8624	34.5536	0.0749282	0.825513	5.3967	28.477	0.0878373	0.48923
4.0109	34.0179	0.077809	0.812715	5.6043	28.4726	0.0912163	0.489154
4.1595	34.5714	0.0806918	0.825939	5.8119	24.3601	0.0945952	0.418502
4.308	33.5	0.0835726	0.800342	6.0194	26.6003	0.0979725	0.456989
4.4566	34.375	0.0864553	0.821247	6.227	31.1413	0.101351	0.535002
4.6051	33.5714	0.0893362	0.802048	6.4346	26.6698	0.10473	0.458183
4.7537	34.4286	0.0922189	0.822527	6.6421	21.4434	0.108108	0.368394
4.9023	32.7857	0.0951017	0.783277	6.8497	29.0478	0.111487	0.499036
5.0508	32.875	0.0979825	0.78541	7.0573	26.0139	0.114865	0.446914
5.1994	32.7143	0.100865	0.781571	7.2648	23.7453	0.118243	0.40794
5.3479	32.6607	0.103746	0.780291	7.4724	27.3236	0.121622	0.469415
5.4965	32.8036	0.106629	0.783705	7.68	26.75	0.125001	0.45956
5.645	33.4464	0.10951	0.799062	7.8875	31.9215	0.128378	0.548406
5.7936	32.9821	0.112392	0.787969	8.0951	21.275	0.131757	0.365501
5.9421	33	0.115273	0.788397	8.3027	22.9956	0.135136	0.39506
6.0907	34.8393	0.118156	0.832339	8.5102	25.588	0.138513	0.439597
6.2392	35	0.121037	0.836178	8.7178	33.4609	0.141892	0.574853
6.3878	35.6786	0.123919	0.852391	8.9254	24.8813	0.145271	0.427456
6.5363	34.8393	0.1268	0.832339	9.1329	25.2403	0.148648	0.433624
6.6849	34.0893	0.129683	0.814421	9.3405	28.6554	0.152027	0.492295
6.8334	34.6964	0.132564	0.828925	9.5481	30.4602	0.155406	0.523301
6.982	35.4286	0.135447	0.846418	9.7556	33.412	0.158783	0.574012
7.1306	34.9286	0.138329	0.834473	9.9632	30.2454	0.162162	0.519611
7.2791	35.3393	0.14121	0.844284	10.1708	39.4098	0.165541	0.677054
7.4277	35.0536	0.144093	0.837459	10.3783	32.7677	0.168918	0.562943
7.5762	35.3393	0.146974	0.844284	10.5859	33.1486	0.172297	0.569487
7.7248	34.8571	0.149856	0.832764	10.7935	23.3433	0.175676	0.401034
7.8733	34.5	0.152737	0.824233	11.001	27.8493	0.179054	0.478446
8.0219	34.0714	0.15562	0.813993	11.2086	27.1903	0.182433	0.467125
8.1704	34.0714	0.158501	0.813993	11.4162	32.3778	0.185811	0.556245
8.319	34.8929	0.161384	0.83362	11.6237	30.3272	0.189189	0.521016
8.4675	34.8036	0.164264	0.831486	11.8313	32.1576	0.192568	0.552462
8.6161	35.0357	0.167147	0.837031	12.0389	41.7359	0.195947	0.717016
8.7646	34.3214	0.170028	0.819966	12.2464	37.2168	0.199324	0.639378
8.9132	35.5	0.172911	0.848124	12.454	36.2513	0.202703	0.622791
9.0617	34.5714	0.175791	0.825939	12.6616	28.958	0.206082	0.497493
9.2103	34.5714	0.178674	0.825939	12.8691	31.7286	0.209459	0.545092
9.3589	33.9643	0.181557	0.811435	13.0767	24.1114	0.212838	0.41423
9.5074	34.5	0.184438	0.824233	13.2843	34.114	0.216217	0.586073
9.656	34.3393	0.187321	0.820394	13.4918	39.408	0.219594	0.677023
9.8045	34.5357	0.190201	0.825086	13.6994	23.1118	0.222973	0.397057
9.9531	35.1071	0.193084	0.838737	13.907	24.3351	0.226352	0.418073
10.1016	34.2857	0.195965	0.819113	14.1145	29.691	0.229729	0.510086
10.2502	33.1964	0.198848	0.793089	14.3221	24.7118	0.233108	0.424544
10.3987	33.6607	0.201728	0.804181	14.5297	22.3846	0.236487	0.384564
10.5473	33.2143	0.204611	0.793517	14.7372	27.4697	0.239864	0.471925
10.6958	33.7321	0.207492	0.805887	14.9448	31.5551	0.243243	0.542111
10.8444	34	0.210375	0.812288	15.1524	25.2051	0.246622	0.433019
10.9929	33.6964	0.213256	0.805034	15.3599	24.5	0.25	0.420906
11.1415	33.625	0.216138	0.803328	15.5675	30.3289	0.253379	0.521045
11.29	33.4464	0.219019	0.799062	15.7751	26.7239	0.256757	0.459112
11.4386	33.0893	0.221902	0.79053	15.9826	29.8388	0.260135	0.512625
11.5872	33.0714	0.224785	0.790103	16.1902	31.3327	0.263514	0.53829
11.7357	33.6786	0.227665	0.804609	16.3977	31.3833	0.266891	0.53916
11.8843	33.1429	0.230548	0.791811	16.6053	27.0124	0.27027	0.464068
12.0328	33.9107	0.233429	0.810154	16.8129	27.4379	0.273649	0.471378
12.1814	33.875	0.236312	0.809301	17.0204	31.5818	0.277026	0.54257
12.3299	33.4643	0.239193	0.799489	17.228	34.7226	0.280405	0.596528
12.4785	33.2143	0.242075	0.793517	17.4356	39.8707	0.283784	0.684972
12.627	34.25	0.244956	0.81826	17.6431	33.5573	0.287161	0.576509
12.7756	34	0.247839	0.812288	17.8507	29.8258	0.29054	0.512402
12.9241	33.4464	0.25072	0.799062	18.0583	34.952	0.293919	0.600469
13.0727	33.1607	0.253602	0.792236	18.2658	38.2454	0.297296	0.657049
13.2212	34.9286	0.256483	0.834473	18.4734	37.9195	0.300675	0.65145
13.3698	34.4107	0.259366	0.822099	18.681	35.9522	0.304054	0.617653
13.5183	33.9821	0.262247	0.81186	18.8885	39.3219	0.307432	0.675543
13.6669	34.3214	0.26513	0.819966	19.0961	46.2067	0.31081	0.793823
13.8154	34	0.26801	0.812288	19.3037	38.011	0.314189	0.653022
13.964	34.6429	0.270893	0.827647	19.5112	38.004	0.317567	0.652902
14.1126	33.9821	0.273776	0.81186	19.7188	34.8369	0.320946	0.598492
14.2611	33.6071	0.276657	0.802901	19.9264	30.3915	0.324325	0.522121
14.4097	33.875	0.279539	0.809301	20.1339	38.3462	0.327702	0.658781
14.5582	34.3214	0.28242	0.819966	20.3415	33.5924	0.331081	0.577112
14.7068	35.2321	0.285303	0.841723	20.5491	35.618	0.33446	0.611911
14.8553	34.1786	0.288184	0.816554	20.7566	30.9766	0.337837	0.532173
15.0039	34.0179	0.291067	0.812715	20.9642	40.9642	0.341216	0.703758
15.1524	35.1964	0.293947	0.84087	21.1718	37.5858	0.344595	0.645718
15.301	35.3214	0.29683	0.843857	21.3793	43.614	0.347972	0.749281
15.4495	35.6964	0.299711	0.852816	21.5869	55.729	0.351351	0.957415
15.5981	34.7321	0.302594	0.829778	21.7945	45.8815	0.35473	0.788236
15.7466	35.3929	0.305475	0.845565	22.002	42.6497	0.358107	0.732715
15.8952	35.6429	0.308357	0.851538	22.2096	42.468	0.361486	0.729593
16.0437	36.6964	0.311238	0.876707	22.4172	42.6143	0.364865	0.732106
16.1923	35.625	0.314121	0.85111	22.6247	45.7975	0.368242	0.786793
16.3409	36.0714	0.317004	0.861775	22.8323	34.8934	0.371621	0.599463
16.4894	36.5893	0.319884	0.874148	23.0399	27.25	0.375	0.46815
16.638	37.1429	0.322767	0.887374	23.2474	39.0643	0.378377	0.671118
16.7865	38.7143	0.325648	0.924916	23.455	46.5135	0.381756	0.799094
16.9351	37.9643	0.328531	0.906998	23.6626	45.6413	0.385135	0.78411
17.0836	37.1429	0.331411	0.887374	23.8701	36.0683	0.388513	0.619647
17.2322	37.1429	0.334294	0.887374	24.0777	27.6881	0.391892	0.475677
17.3807	38.0357	0.337175	0.908704	24.2853	28.1587	0.39527	0.483762
17.5293	39.6964	0.340058	0.948379	24.4928	17.9927	0.398648	0.309111
17.6778	39.7143	0.342939	0.948807	24.7004	10.7579	0.402027	0.184819
17.8264	39.5357	0.345821	0.94454	24.908	5.6384	0.405406	0.0968667
17.9749	39.625	0.348702	0.946673	25.1155	4.4531	0.408783	0.0765035
18.1235	39.7321	0.351585	0.949232	25.3231	1.2663	0.412162	0.0217548
18.272	40.4643	0.354466	0.966725	25.5307	2.1406	0.415541	0.0367751
18.4206	40.5536	0.357348	0.968858	25.7382	1.401	0.418918	0.0240689
18.5692	37.25	0.360231	0.889933	25.9458	0.7031	0.422297	0.0120791
18.7177	37.3393	0.363112	0.892066	26.1534	0.1841	0.425676	0.00316281
18.8663	37.1607	0.365995	0.887799	26.3609	2.2484	0.429053	0.0386271
19.0148	36.8393	0.368876	0.880121	26.5685	2.2703	0.432432	0.0390034
19.1634	36.125	0.371758	0.863055	26.7761	0.2054	0.435811	0.00352874
19.3119	35.7143	0.374639	0.853244	26.9836	0	0.439188	0
19.4605	35.7143	0.377522	0.853244	27.1912	0	0.442567	0
19.609	33.1071	0.380403	0.790955	27.3988	0.0161	0.445946	0.000276595
19.7576	29.5	0.383285	0.704779	27.6063	0.685	0.449323	0.0117682
19.9061	26.8929	0.386166	0.642493	27.8139	0.5804	0.452702	0.00997117
20.0547	23.6786	0.389049	0.565701	28.0215	0.347	0.456081	0.0059614
20.2032	21.0536	0.39193	0.502988	28.229	0	0.459459	0
20.3518	18.4107	0.394813	0.439847	28.4366	0	0.462838	0
20.5003	15.25	0.397693	0.364335	28.6442	0	0.466216	0
20.6489	11.6607	0.400576	0.278584	28.8517	0	0.469594	0
20.7975	8.625	0.403459	0.206058	29.0593	0	0.472973	0
20.946	6.4107	0.40634	0.153157	29.2669	0	0.476352	0
21.0946	5.7857	0.409222	0.138225	29.4744	0	0.479729	0
21.2431	5.4286	0.412103	0.129694	29.682	0	0.483108	0
21.3917	5.4286	0.414986	0.129694	29.8896	0	0.486487	0
21.5402	5.625	0.417867	0.134386	30.0971	0.2045	0.489864	0.00351327
21.6888	4.8036	0.42075	0.114762	30.3047	0	0.493243	0
21.8373	4.6786	0.42363	0.111776	30.5123	0	0.496622	0
21.9859	4.3571	0.426513	0.104095	30.7198	0	0.499999	0
22.1344	3.8214	0.429394	0.0912963	30.9274	0	0.503378	0
22.283	3.6429	0.432277	0.0870318	31.135	0	0.506757	0
22.4315	3.3214	0.435158	0.0793509	31.3425	0	0.510134	0
22.5801	3.1429	0.43804	0.0750864	31.5501	0	0.513513	0
22.7286	3.0714	0.440921	0.0733782	31.7577	0	0.516892	0
22.8772	3.0179	0.443804	0.0721001	31.9652	0	0.520269	0
23.0257	3.1429	0.446685	0.0750864	32.1728	0	0.523648	0
23.1743	3.0536	0.449567	0.072953	32.3804	0	0.527027	0
23.3229	3.1964	0.45245	0.0763646	32.5879	0	0.530405	0
23.4714	3.3929	0.455331	0.0810591	32.7955	0	0.533784	0
23.62	3.6607	0.458214	0.0874571	33.0031	0	0.537162	0
23.7685	3.7857	0.461095	0.0904434	33.2106	0.0146	0.54054	0.000250825
23.9171	4.2143	0.463977	0.100683	33.4182	0	0.543919	0
24.0656	4.1964	0.466858	0.100255	33.6258	0	0.547298	0
24.2142	4.3214	0.469741	0.103242	33.8333	0	0.550675	0
24.3627	5.25	0.472622	0.125427	34.0409	0.3944	0.554054	0.00677572
24.5113	6.1429	0.475504	0.146759	34.2485	0.2148	0.557433	0.00369023
24.6598	7.375	0.478385	0.176195	34.456	0	0.56081	0
24.8084	8.9821	0.481268	0.21459	34.6636	0	0.564189	0
24.9569	11.3036	0.484149	0.270052	34.8712	0	0.567568	0
25.1055	13	0.487032	0.310581	35.0787	0.3353	0.570945	0.0057604
25.254	14.9643	0.489912	0.357509	35.2863	0.1512	0.574324	0.00259759
25.4026	17.0714	0.492795	0.40785	35.4939	0	0.577703	0
25.5512	18.1429	0.495678	0.433449	35.7014	0	0.58108	0
25.6997	20.0893	0.498559	0.47995	35.909	0	0.584459	0
25.8483	21.1071	0.501441	0.504266	36.1166	0.0581	0.587838	0.000998148
25.9968	22.3214	0.504322	0.533276	36.3241	0.1145	0.591215	0.00196709
26.1454	22.7679	0.507205	0.543944	36.5317	0.3229	0.594594	0.00554737
26.2939	24.5357	0.510086	0.586178	36.7393	1.4662	0.597973	0.0251891
26.4425	26.4107	0.512968	0.630973	36.9468	1.1282	0.601351	0.0193823
26.591	27.8929	0.515849	0.666384	37.1544	0.8976	0.60473	0.0154206
26.7396	28.5179	0.518732	0.681316	37.362	3.2571	0.608108	0.0559564
26.8881	29.7321	0.521613	0.710324	37.5695	2.5378	0.611486	0.043599
27.0367	31.9286	0.524496	0.7628	37.7771	6.8126	0.614865	0.117039
27.1852	34.0536	0.527376	0.813568	37.9847	21.1501	0.618244	0.363355
27.3338	34.7321	0.530259	0.829778	38.1922	28.4018	0.621621	0.487938
27.4823	35.4643	0.53314	0.847271	38.3998	44.75	0.625	0.768797
27.6309	35.2143	0.536023	0.841298	38.6074	45.5924	0.628379	0.78327
27.7795	36.6071	0.538905	0.874573	38.8149	48.5794	0.631756	0.834586
27.928	36.5357	0.541786	0.872867	39.0225	37.3192	0.635135	0.641137
28.0766	37.8571	0.544669	0.904437	39.2301	38.2571	0.638514	0.65725
28.2251	39.6964	0.54755	0.948379	39.4376	46.5858	0.641891	0.800336
28.3737	40.8214	0.550433	0.975256	39.6452	51.636	0.64527	0.887098
28.5222	41.8393	0.553313	0.999575	39.8528	41.2148	0.648649	0.708063
28.6708	41.0893	0.556196	0.981657	40.0603	35.7374	0.652026	0.613962
28.8193	40.9107	0.559077	0.97739	40.2679	43.6132	0.655405	0.749267
28.9679	41.8571	0.56196	1	40.4755	42.8402	0.658784	0.735987
29.1164	40.7679	0.564841	0.973978	40.683	26.9649	0.662161	0.463252
29.265	40.0536	0.567723	0.956913	40.8906	34.6178	0.66554	0.594728
29.4135	40.0714	0.570604	0.957338	41.0982	44.8729	0.668919	0.770909
29.5621	40.6607	0.573487	0.971417	41.3057	43.9998	0.672297	0.755909
29.7106	39.0179	0.576368	0.932169	41.5133	40.1907	0.675675	0.690469
29.8592	38.6607	0.57925	0.923635	41.7209	40.0906	0.679054	0.68875
30.0078	38	0.582133	0.907851	41.9284	38.8156	0.682432	0.666845
30.1563	38.625	0.585014	0.922783	42.136	38.2586	0.685811	0.657276
30.3049	37.9821	0.587897	0.907423	42.3436	46.9036	0.68919	0.805796
30.4534	37.7679	0.590778	0.902306	42.5511	44.9896	0.692567	0.772914
30.602	36.7143	0.59366	0.877134	42.7587	44.0665	0.695946	0.757055
30.7505	36.1964	0.596541	0.864761	42.9663	38.393	0.699325	0.659585
30.8991	35.5179	0.599424	0.848551	43.1738	36.4529	0.702702	0.626255
31.0476	35.2321	0.602305	0.841723	43.3814	46.559	0.706081	0.799876
31.1962	34.6071	0.605187	0.826792	43.589	45.1253	0.70946	0.775245
31.3447	36.2321	0.608068	0.865614	43.7965	37.1461	0.712837	0.638164
31.4933	34.9643	0.610951	0.835325	44.0041	27.3528	0.716216	0.469916
31.6418	35	0.613832	0.836178	44.2117	43.9231	0.719595	0.754591
31.7904	34.7143	0.616715	0.829353	44.4192	34.5679	0.722972	0.593871
31.9389	34.6429	0.619595	0.827647	44.6268	31.8298	0.726351	0.54683
32.0875	34.5714	0.622478	0.825939	44.8344	29.3287	0.72973	0.503862
32.236	34.375	0.625359	0.821247	45.0419	35.3475	0.733107	0.607264
32.3846	35.1786	0.628242	0.840445	45.2495	36.5836	0.736486	0.6285
32.5332	34.3214	0.631124	0.819966	45.4571	32.8643	0.739865	0.564603
32.6817	33.8214	0.634005	0.808021	45.6646	39.3879	0.743243	0.676677
32.8303	33.9821	0.636888	0.81186	45.8722	40.1596	0.746621	0.689935
32.9788	33.8036	0.639769	0.807595	46.0798	40	0.75	0.687193
33.1274	33.4107	0.642652	0.798209	46.2873	58.2078	0.753378	1
33.2759	32.2679	0.645532	0.770906	46.4949	52.3506	0.756757	0.899374
33.4245	31.5714	0.648415	0.754266	46.7024	51.1216	0.760134	0.87826
33.573	31.0893	0.651296	0.742749	46.91	45.1885	0.763513	0.776331
33.7216	31.0714	0.654179	0.742321	47.1176	42.5042	0.766892	0.730215
33.8701	31.5714	0.657059	0.754266	47.3251	45.2381	0.770269	0.777183
34.0187	31.0536	0.659942	0.741896	47.5327	52.6329	0.773648	0.904224
34.1672	31.2857	0.662823	0.747441	47.7403	41.321	0.777027	0.709888
34.3158	31.3571	0.665706	0.749147	47.9478	34.635	0.780404	0.595023
34.4643	30.5179	0.668587	0.729097	48.1554	33.5822	0.783783	0.576936
34.6129	30.25	0.671469	0.722697	48.363	23.819	0.787162	0.409206
34.7615	30.75	0.674352	0.734642	48.5705	26.4938	0.790539	0.455159
34.91	30.0357	0.677233	0.717577	48.7781	20.0305	0.793918	0.344121
35.0586	30.5714	0.680116	0.730375	48.9857	23.0869	0.797297	0.396629
35.2071	31	0.682996	0.740615	49.1932	19.6399	0.800674	0.33741
35.3557	29.9643	0.685879	0.715871	49.4008	18.6844	0.804053	0.320995
35.5042	30.2857	0.68876	0.72355	49.6084	25.9651	0.807432	0.446076
35.6528	30.5893	0.691643	0.730803	49.8159	22.6245	0.81081	0.388685
35.8013	31.1786	0.694524	0.744882	50.0235	24.7447	0.814189	0.42511
35.9499	30.4643	0.697406	0.727817	50.2311	14.7611	0.817567	0.253593
36.0984	29.8571	0.700287	0.71331	50.4386	22.468	0.820945	0.385996
36.247	29.8571	0.70317	0.71331	50.6462	30.4434	0.824324	0.523012
36.3955	29.3571	0.706051	0.701365	50.8538	25.9089	0.827703	0.44511
36.5441	28.6071	0.708933	0.683447	51.0613	25.847	0.83108	0.444047
36.6926	28.7143	0.711814	0.686008	51.2689	24.4306	0.834459	0.419714
36.8412	28.6071	0.714697	0.683447	51.4765	24.7253	0.837838	0.424776
36.9898	28.5893	0.71758	0.683022	51.684	21.5847	0.841215	0.370821
37.1383	28.7679	0.720461	0.687288	51.8916	28.5267	0.844594	0.490084
37.2869	29.6607	0.723343	0.708618	52.0992	30.313	0.847973	0.520772
37.4354	28.9107	0.726224	0.6907	52.3067	22.3316	0.85135	0.383653
37.584	29.125	0.729107	0.69582	52.5143	23.5206	0.854729	0.40408
37.7325	29.7321	0.731988	0.710324	52.7219	22.1614	0.858108	0.380729
37.8811	30.3393	0.73487	0.72483	52.9294	27.679	0.861485	0.47552
38.0296	30.375	0.737751	0.725683	53.137	36.0928	0.864864	0.620068
38.1782	29.7679	0.740634	0.711179	53.3446	36.4191	0.868243	0.625674
38.3267	29.2679	0.743515	0.699234	53.5521	30.9817	0.87162	0.53226
38.4753	29.1071	0.746398	0.695392	53.7597	36.5	0.874999	0.627064
38.6238	29.1429	0.749278	0.696247	53.9673	29.7867	0.878378	0.51173
38.7724	29.5357	0.752161	0.705632	54.1748	32.4118	0.881756	0.556829
38.9209	29.6786	0.755042	0.709046	54.3824	25.8316	0.885135	0.443782
39.0695	29.3036	0.757925	0.700087	54.59	26.517	0.888513	0.455558
39.2181	29.9107	0.760807	0.714591	54.7975	27.2747	0.891891	0.468575
39.3666	30.5179	0.763688	0.729097	55.0051	28.676	0.89527	0.492649
39.5152	30.625	0.766571	0.731656	55.2127	34.6461	0.898649	0.595214
39.6637	30.9821	0.769452	0.740187	55.4202	34.7715	0.902026	0.597368
39.8123	31.25	0.772335	0.746588	55.6278	29.3367	0.905405	0.503999
39.9608	30.125	0.775215	0.719711	55.8354	31.6618	0.908784	0.543944
40.1094	30.1964	0.778098	0.721416	56.0429	28.5851	0.912161	0.491087
40.2579	31.125	0.780979	0.743601	56.2505	24.8395	0.91554	0.426738
40.4065	30.6429	0.783862	0.732084	56.4581	34.5946	0.918919	0.594329
40.555	30.375	0.786742	0.725683	56.6656	29.4898	0.922296	0.50663
40.7036	30.2679	0.789625	0.723125	56.8732	38.0895	0.925675	0.654371
40.8521	29.8036	0.792506	0.712032	57.0808	29.2686	0.929054	0.50283
41.0007	30.4107	0.795389	0.726536	57.2883	25.927	0.932431	0.445421
41.1492	30.9286	0.79827	0.738909	57.4959	32.1808	0.93581	0.552861
41.2978	30.6786	0.801152	0.732937	57.7035	31.0866	0.939189	0.534062
41.4464	30.0893	0.804035	0.718858	57.911	26.2732	0.942566	0.451369
41.5949	30.8214	0.806916	0.736348	58.1186	32.859	0.945945	0.564512
41.7435	31.6964	0.809799	0.757253	58.3262	35.6547	0.949324	0.612542
41.892	30.375	0.812679	0.725683	58.5337	25.4883	0.952702	0.437885
42.0406	30.9821	0.815562	0.740187	58.7413	25.725	0.956081	0.441951
42.1891	31.5536	0.818443	0.753841	58.9489	36.5121	0.959459	0.627272
42.3377	30.6607	0.821326	0.732509	59.1564	38.5789	0.962837	0.662779
42.4862	31.2857	0.824207	0.747441	59.364	46.6837	0.966216	0.802018
42.6348	31.1786	0.827089	0.744882	59.5716	32.3959	0.969595	0.556556
42.7833	31.5179	0.82997	0.752988	59.7791	30.1286	0.972972	0.517604
42.9319	30.3036	0.832853	0.723978	59.9867	25.7551	0.976351	0.442468
43.0804	31.2857	0.835734	0.747441	60.1943	31.3831	0.97973	0.539156
43.229	30.8929	0.838616	0.738056	60.4018	33.5696	0.983107	0.57672
43.3775	31.1071	0.841497	0.743174	60.6094	30.0526	0.986486	0.516299
43.5261	30.625	0.84438	0.731656	60.817	32.8079	0.989865	0.563634
43.6746	30.9107	0.847261	0.738482	61.0245	26.095	0.993242	0.448308
43.8232	30.7321	0.850144	0.734215	61.2321	34.8961	0.996621	0.599509
43.9718	30.75	0.853026	0.734642	61.4397	30	1	0.515395
44.1203	30.6607	0.855907	0.732509
44.2689	30.6607	0.85879	0.732509
44.4174	31.1429	0.861671	0.744029
44.566	31.4286	0.864553	0.750855
44.7145	31.5357	0.867434	0.753413
44.8631	31.4821	0.870317	0.752133
45.0116	32.1429	0.873198	0.76792
45.1602	31.8036	0.876081	0.759814
45.3087	31.4643	0.878961	0.751708
45.4573	31.5357	0.881844	0.753413
45.6058	31.375	0.884725	0.749574
45.7544	31.6071	0.887608	0.755119
45.9029	31	0.890488	0.740615
46.0515	30	0.893371	0.716724
46.2001	30.5536	0.896254	0.72995
46.3486	32.3036	0.899135	0.771759
46.4972	32.0536	0.902018	0.765786
46.6457	32.3393	0.904898	0.772612
46.7943	32.0179	0.907781	0.764934
46.9428	31.6964	0.910662	0.757253
47.0914	31.8036	0.913545	0.759814
47.2399	32.0179	0.916425	0.764934
47.3885	32.7679	0.919308	0.782852
47.537	32.8214	0.922189	0.78413
47.6856	32.9464	0.925072	0.787116
47.8341	33.4286	0.927953	0.798636
47.9827	33.3036	0.930835	0.79565
48.1312	32.3929	0.933716	0.773893
48.2798	32.5536	0.936599	0.777732
48.4284	32.9643	0.939482	0.787544
48.5769	33.2857	0.942362	0.795222
48.7255	32.5714	0.945245	0.778157
48.874	32.4464	0.948126	0.775171
49.0226	32.5714	0.951009	0.778157
49.1711	33.4464	0.95389	0.799062
49.3197	33.4286	0.956772	0.798636
49.4682	33.3571	0.959653	0.796928
49.6168	33.0536	0.962536	0.789677
49.7653	32.9464	0.965417	0.787116
49.9139	32.4821	0.968299	0.776024
50.0624	32.3036	0.97118	0.771759
50.211	33.2679	0.974063	0.794797
50.3595	33.3036	0.976944	0.79565
50.5081	32.9821	0.979827	0.787969
50.6567	33.3393	0.982709	0.796503
50.8052	33.5357	0.98559	0.801195
50.9538	34.5893	0.988473	0.826366
51.1023	34.2857	0.991354	0.819113
51.2509	34.6607	0.994236	0.828072
51.3994	35.0714	0.997117	0.837884
51.548	34.625	1	0.827219

## Sheet: 4-cells telophase
Embryo 1				Embryo 2
X	Y			X2	Y
0	22	0	0.316432	0	21	0	0.261015
0.1576	24.5971	0.00359639	0.353787	0.1622	17.7568	0.00529194	0.220705
0.3153	27.9928	0.00719507	0.402628	0.3243	22.5491	0.0105806	0.28027
0.4729	23.9065	0.0107915	0.343854	0.4865	20.4832	0.0158725	0.254592
0.6305	21.7914	0.0143878	0.313432	0.6487	20.7739	0.0211645	0.258205
0.7882	16.7554	0.0179865	0.240998	0.8109	20.5011	0.0264564	0.254814
0.9458	20.3022	0.0215829	0.292012	0.973	22.6067	0.0317451	0.280986
1.1034	17.3525	0.0251793	0.249586	1.1352	23.5391	0.037037	0.292575
1.2611	19.3885	0.028778	0.27887	1.2974	18.0672	0.042329	0.224563
1.4187	25.5468	0.0323744	0.367447	1.4595	19.5714	0.0476176	0.243259
1.5763	27.0288	0.0359708	0.388763	1.6217	18.8638	0.0529096	0.234464
1.734	28.3381	0.0395694	0.407595	1.7839	19.7264	0.0582015	0.245186
1.8916	21.0216	0.0431658	0.302359	1.9461	17.7037	0.0634935	0.220045
2.0492	27.9281	0.0467622	0.401698	2.1082	17.0127	0.0687821	0.211456
2.2069	22.4748	0.0503609	0.323261	2.2704	18.1111	0.0740741	0.225108
2.3645	25.7986	0.0539573	0.371068	2.4326	16.3051	0.079366	0.202661
2.5221	24.8345	0.0575537	0.357201	2.5947	18.9312	0.0846547	0.235302		Middle point = cell-cell contacts
2.6797	24.2878	0.0611501	0.349338	2.7569	17.2369	0.0899466	0.214243
2.8374	23.3741	0.0647487	0.336196	2.9191	19.746	0.0952386	0.245429
2.995	22.3022	0.0683451	0.320779	3.0813	20.4221	0.10053	0.253833
3.1526	21.9928	0.0719415	0.316328	3.2434	20.0941	0.105819	0.249756
3.3103	27.6547	0.0755402	0.397765	3.4056	17.6296	0.111111	0.219124
3.4679	23.3237	0.0791366	0.335471	3.5678	19.6637	0.116403	0.244406
3.6255	28.8417	0.082733	0.414838	3.7299	19.1217	0.121692	0.23767
3.7832	28.2086	0.0863317	0.405732	3.8921	21.037	0.126984	0.261475
3.9408	22.777	0.089928	0.327608	4.0543	25.155	0.132276	0.312659
4.0984	28.9065	0.0935244	0.41577	4.2165	23.4562	0.137568	0.291544
4.2561	26.6403	0.0971231	0.383175	4.3786	23.8571	0.142856	0.296527
4.4137	26.1799	0.10072	0.376553	4.5408	22.1262	0.148148	0.275013
4.5713	29	0.104316	0.417115	4.703	21.9545	0.15344	0.272879
4.729	32.4892	0.107915	0.467301	4.8651	19.5697	0.158729	0.243238
4.8866	31.3165	0.111511	0.450434	5.0273	20.2246	0.164021	0.251378
5.0442	27	0.115107	0.388348	5.1895	22.1321	0.169313	0.275087
5.2019	30.0432	0.118706	0.43212	5.3517	21.619	0.174605	0.268709
5.3595	29.1655	0.122302	0.419495	5.5138	21.2436	0.179893	0.264043
5.5171	29.2374	0.125899	0.42053	5.676	19.9177	0.185185	0.247563
5.6748	27.187	0.129497	0.391038	5.8382	20.1429	0.190477	0.250362
5.8324	27.6331	0.133094	0.397454	6.0004	20.3945	0.195769	0.25349
5.99	25.9137	0.13669	0.372724	6.1625	19.8307	0.201058	0.246482
6.1477	22.1439	0.140289	0.318502	6.3247	19.1605	0.20635	0.238152
6.3053	31.9568	0.143885	0.459643	6.4869	20.5767	0.211642	0.255754
6.4629	32.8058	0.147482	0.471855	6.649	21.066	0.21693	0.261836
6.6206	29.1942	0.15108	0.419908	6.8112	24.0741	0.222222	0.299224
6.7782	22.4964	0.154677	0.323572	6.9734	23.2698	0.227514	0.289228
6.9358	26.3741	0.158273	0.379346	7.1356	23.0249	0.232806	0.286184
7.0934	28.6691	0.16187	0.412356	7.2977	22.4762	0.238095	0.279364
7.2511	23.4317	0.165468	0.337025	7.4599	21.5197	0.243387	0.267475
7.4087	30.6331	0.169065	0.440604	7.6221	21.5558	0.248679	0.267924
7.5663	30.8345	0.172661	0.443501	7.7842	22.2169	0.253967	0.276141
7.724	28.6115	0.17626	0.411527	7.9464	21.0384	0.259259	0.261493
7.8816	26.964	0.179856	0.387831	8.1086	22.3371	0.264551	0.277635
8.0392	28.4317	0.183452	0.408941	8.2708	23.3333	0.269843	0.290017
8.1969	30.3813	0.187051	0.436983	8.4329	26.2403	0.275132	0.326149
8.3545	28.6691	0.190648	0.412356	8.5951	28.0294	0.280424	0.348386
8.5121	27.7194	0.194244	0.398696	8.7573	27.5714	0.285716	0.342693
8.6698	29	0.197843	0.417115	8.9194	24.0159	0.291004	0.298501
8.8274	29.0791	0.201439	0.418253	9.0816	21.1139	0.296296	0.262431
8.985	31.1295	0.205035	0.447744	9.2438	22.1411	0.301588	0.275199
9.1427	30.7626	0.208634	0.442467	9.406	23.6535	0.30688	0.293997
9.3003	32.8849	0.21223	0.472993	9.5681	24.6945	0.312169	0.306936
9.4579	34.8705	0.215827	0.501552	9.7303	24.9647	0.317461	0.310294
9.6156	31.8561	0.219426	0.458195	9.8925	25.3762	0.322753	0.315409
9.7732	32.2662	0.223022	0.464094	10.0546	26.0515	0.328041	0.323802
9.9308	28.554	0.226618	0.4107	10.2168	26.3333	0.333333	0.327305
10.0885	27.8921	0.230217	0.40118	10.379	27.9249	0.338625	0.347087
10.2461	32.4532	0.233813	0.466783	10.5412	26.4658	0.343917	0.328952
10.4037	33.7338	0.23741	0.485202	10.7033	28.8377	0.349206	0.358433
10.5614	32.8849	0.241008	0.472993	10.8655	27.7701	0.354498	0.345163
10.719	28	0.244605	0.402732	11.0277	26.2222	0.35979	0.325924
10.8766	31.0504	0.248201	0.446606	11.1898	29.418	0.365078	0.365645
11.0343	31.4748	0.2518	0.452711	11.352	30.0206	0.37037	0.373135
11.1919	31.7266	0.255396	0.456332	11.5142	27.6729	0.375662	0.343955
11.3495	31.1223	0.258993	0.447641	11.6764	26.254	0.380954	0.326319
11.5071	34.3237	0.262589	0.493687	11.8385	28.4045	0.386243	0.353048
11.6648	34	0.266188	0.489031	12.0007	28.9246	0.391535	0.359513
11.8224	29.1151	0.269784	0.41877	12.1629	33.1358	0.396827	0.411855
11.98	31.482	0.273381	0.452814	12.325	33.2389	0.402115	0.413137
12.1377	42.777	0.276979	0.615273	12.4872	36.4966	0.407407	0.453627
12.2953	35.5755	0.280576	0.511692	12.6494	32.8236	0.412699	0.407975
12.4529	36.1727	0.284172	0.520282	12.8116	26.1809	0.417991	0.32541
12.6106	34.2302	0.287771	0.492342	12.9737	24.6341	0.42328	0.306185
12.7682	36.3669	0.291367	0.523075	13.1359	24	0.428572	0.298303
12.9258	40.741	0.294963	0.585989	13.2981	26.7984	0.433864	0.333086
13.0835	45.0216	0.298562	0.647558	13.4602	27.0915	0.439153	0.336729
13.2411	33.7626	0.302159	0.485617	13.6224	26.1605	0.444444	0.325157
13.3987	38.5611	0.305755	0.554635	13.7846	27.0376	0.449736	0.336059
13.5564	32.6691	0.309354	0.469889	13.9468	24.7733	0.455028	0.307915
13.714	37.0504	0.31295	0.532906	14.1089	26.2575	0.460317	0.326363
13.8716	35.0216	0.316546	0.503725	14.2711	29.9902	0.465609	0.372757
14.0293	37.0719	0.320145	0.533215	14.4333	30.321	0.470901	0.376869
14.1869	40.7122	0.323741	0.585575	14.5954	34.4127	0.47619	0.427726
14.3445	31.9137	0.327338	0.459023	14.7576	46.2222	0.481481	0.57451
14.5022	38.5324	0.330936	0.554222	14.9198	69.8323	0.486773	0.867967
14.6598	27.8993	0.334533	0.401283	15.082	80.455	0.492065	1
14.8174	36.4676	0.338129	0.524523	15.2441	56.7466	0.497354	0.705321
14.9751	28	0.341728	0.402732	15.4063	30.9379	0.502646	0.384537
15.1327	32.3381	0.345324	0.465128	15.5685	22.3827	0.507938	0.278201
15.2903	31.2302	0.348921	0.449193	15.7306	25.4096	0.513227	0.315824
15.448	30.3237	0.352519	0.436154	15.8928	28.2071	0.518519	0.350595
15.6056	28.1151	0.356116	0.404387	16.055	27.8889	0.52381	0.34664
15.7632	31.964	0.359712	0.459747	16.2172	28.6723	0.529102	0.356377
15.9209	31.9137	0.363311	0.459023	16.3793	30.2898	0.534391	0.376481
16.0785	38.2734	0.366907	0.550497	16.5415	30.6226	0.539683	0.380618
16.2361	38.8777	0.370504	0.559189	16.7037	28.4995	0.544975	0.354229
16.3937	33.187	0.3741	0.477338	16.8659	27.1495	0.550267	0.33745
16.5514	30	0.377699	0.431498	17.028	22.6914	0.555556	0.282038
16.709	28.6763	0.381295	0.412459	17.1902	29.4723	0.560847	0.36632
16.8666	36.1655	0.384892	0.520178	17.3524	32.9349	0.566139	0.409358
17.0243	36.6835	0.38849	0.527629	17.5145	18.8571	0.571428	0.234381
17.1819	38	0.392087	0.546564	17.6767	19.6966	0.57672	0.244815
17.3395	38.777	0.395683	0.55774	17.8389	24.1615	0.582012	0.300311
17.4972	36.9496	0.399282	0.531456	18.0011	25.0265	0.587304	0.311062
17.6548	33	0.402878	0.474648	18.1632	26.7599	0.592593	0.332607
17.8124	32	0.406474	0.460265	18.3254	27.5622	0.597885	0.342579
17.9701	44.5971	0.410073	0.641452	18.4876	25.6402	0.603176	0.31869
18.1277	42.8705	0.413669	0.616618	18.6497	22.7486	0.608465	0.282749
18.2853	35.9496	0.417266	0.517073	18.8119	19.2318	0.613757	0.239038
18.443	34.8921	0.420865	0.501863	18.9741	21.2381	0.619049	0.263975
18.6006	32.1727	0.424461	0.462749	19.1363	21.1552	0.624341	0.262945
18.7582	37.9784	0.428057	0.546254	19.2984	21.7764	0.62963	0.270666
18.9159	33.259	0.431656	0.478373	19.4606	17.3404	0.634922	0.215529
19.0735	41	0.435252	0.589714	19.6228	17.3859	0.640214	0.216095
19.2311	45.8489	0.438849	0.659457	19.7849	20.0047	0.645502	0.248645
19.3888	41.0288	0.442447	0.590128	19.9471	20.0564	0.650794	0.249287
19.5464	41	0.446044	0.589714	20.1093	20.1117	0.656086	0.249975
19.704	46.2302	0.44964	0.664942	20.2715	22.0843	0.661378	0.274493
19.8617	36	0.453239	0.517798	20.4336	22.3333	0.666667	0.277587
20.0193	45.2086	0.456835	0.650248	20.5958	21.6177	0.671959	0.268693
20.1769	48.1079	0.460432	0.691949	20.758	20	0.677251	0.248586
20.3346	42.518	0.46403	0.611548	20.9201	21.3051	0.682539	0.264808
20.4922	42.0935	0.467627	0.605442	21.0823	23.5232	0.687831	0.292377
20.6498	54.5827	0.471223	0.785078	21.2445	24.0123	0.693123	0.298456
20.8074	47.8201	0.47482	0.68781	21.4067	24.7143	0.698415	0.307182
20.9651	48.0935	0.478418	0.691742	21.5688	20.4348	0.703704	0.25399
21.1227	50.741	0.482015	0.729822	21.731	19.1356	0.708996	0.237842
21.2803	53.3885	0.485611	0.767901	21.8932	19.5714	0.714288	0.243259
21.438	53.7554	0.48921	0.773179	22.0553	17.3972	0.719576	0.216235
21.5956	54.4029	0.492806	0.782492	22.2175	20.5973	0.724868	0.25601
21.7532	63.4532	0.496402	0.912665	22.3797	21.2099	0.73016	0.263624
21.9109	62	0.500001	0.891763	22.5419	21.5081	0.735452	0.267331
22.0685	60.5036	0.503598	0.87024	22.704	19.177	0.740741	0.238357
22.2261	60.1007	0.507194	0.864445	22.8662	19.6049	0.746033	0.243675
22.3838	69.5252	0.510793	1	23.0284	18.979	0.751325	0.235896
22.5414	52.2086	0.514389	0.750931	23.1905	19.4462	0.756613	0.241703
22.699	60.777	0.517985	0.874172	23.3527	18.0952	0.761905	0.224911
22.8567	49.0216	0.521584	0.705091	23.5149	17.2612	0.767197	0.214545
23.0143	52.4101	0.52518	0.753829	23.6771	18.455	0.772489	0.229383
23.1719	54.1511	0.528777	0.77887	23.8392	19.8025	0.777778	0.246131
23.3296	47.9209	0.532376	0.689259	24.0014	17.6714	0.78307	0.219643
23.4872	44.5036	0.535972	0.640107	24.1636	15.9634	0.788362	0.198414
23.6448	44.1079	0.539568	0.634416	24.3257	18.8395	0.79365	0.234162
23.8025	45	0.543167	0.647247	24.4879	18.8246	0.798942	0.233977
23.9601	47.2734	0.546763	0.679946	24.6501	19.9087	0.804234	0.247451
24.1177	50.5252	0.55036	0.726718	24.8123	18.381	0.809526	0.228463
24.2754	48.2662	0.553958	0.694226	24.9744	20.5789	0.814815	0.255781
24.433	40.1655	0.557555	0.577711	25.1366	21.7762	0.820107	0.270663
24.5906	43.0144	0.561151	0.618688	25.2988	22.2981	0.825399	0.27715
24.7483	43.9065	0.56475	0.631519	25.4609	20.6108	0.830687	0.256178
24.9059	38.6978	0.568346	0.556601	25.6231	21.5559	0.835979	0.267925
25.0635	35.036	0.571943	0.503932	25.7853	25.1005	0.841271	0.311982
25.2211	40.4245	0.575539	0.581437	25.9475	20.0139	0.846563	0.248759
25.3788	38.3237	0.579138	0.55122	26.1096	20.5665	0.851852	0.255627
25.5364	40.2086	0.582734	0.578331	26.2718	19	0.857144	0.236157
25.694	37.6259	0.586331	0.541184	26.434	19.2657	0.862436	0.239459
25.8517	37.223	0.589929	0.535389	26.5961	19.3	0.867724	0.239886
26.0093	32.3094	0.593526	0.464715	26.7583	20.3034	0.873016	0.252357
26.1669	35	0.597122	0.503415	26.9205	20.1474	0.878308	0.250418
26.3246	40	0.600721	0.575331	27.0827	22.3719	0.8836	0.278067
26.4822	34.6978	0.604317	0.499068	27.2448	21.4691	0.888889	0.266846
26.6398	33.0647	0.607913	0.475579	27.407	24.5438	0.894181	0.305062
26.7975	37.4389	0.611512	0.538494	27.5692	24.0174	0.899473	0.29852
26.9551	36.446	0.615108	0.524213	27.7314	22.3651	0.904765	0.277983
27.1127	34.3381	0.618705	0.493894	27.8935	22.8154	0.910053	0.28358
27.2704	34.2878	0.622304	0.493171	28.0557	18.3278	0.915345	0.227802
27.428	34.0504	0.6259	0.489756	28.2179	16.2381	0.920637	0.201828
27.5856	31.1223	0.629496	0.447641	28.38	19.5761	0.925926	0.243317
27.7433	39.3165	0.633095	0.5655	28.5422	26.9155	0.931218	0.334541
27.9009	30.0863	0.636691	0.432739	28.7044	27.1499	0.93651	0.337454
28.0585	30.2158	0.640288	0.434602	28.8666	24.0267	0.941802	0.298635
28.2162	44.7986	0.643886	0.644351	29.0287	22.8748	0.94709	0.284318
28.3738	32.741	0.647483	0.470923	29.1909	21.7778	0.952382	0.270683
28.5314	32.8849	0.651079	0.472993	29.3531	23.6179	0.957674	0.293554
28.6891	25.1655	0.654678	0.361962	29.5152	20.0384	0.962963	0.249063
28.8467	23.7842	0.658274	0.342095	29.6774	21.0899	0.968255	0.262133
29.0043	36.2086	0.661871	0.520798	29.8396	27.9393	0.973547	0.347266
29.162	25.9496	0.665469	0.37324	30.0018	19.1174	0.978839	0.237616
29.3196	31.964	0.669066	0.459747	30.1639	19.5926	0.984127	0.243522
29.4772	26.8345	0.672662	0.385968	30.3261	21.571	0.989419	0.268113
29.6349	31	0.676261	0.445881	30.4883	19.7721	0.994711	0.245754
29.7925	25.554	0.679857	0.36755	30.6504	19	1	0.236157
29.9501	29.4101	0.683454	0.423014
30.1077	27	0.68705	0.388348
30.2654	20.3237	0.690649	0.292321
30.423	28.5971	0.694245	0.41132
30.5806	24.2302	0.697841	0.34851
30.7383	22.6403	0.70144	0.325642
30.8959	33.3525	0.705037	0.479718
31.0535	26.7626	0.708633	0.384934
31.2112	26.8273	0.712232	0.385864
31.3688	29.8489	0.715828	0.429325
31.5264	26.2878	0.719424	0.378105
31.6841	27.1007	0.723023	0.389797
31.8417	27.964	0.726619	0.402214
31.9993	27.6691	0.730216	0.397972
32.157	25.9137	0.733815	0.372724
32.3146	26.0576	0.737411	0.374794
32.4722	28	0.741007	0.402732
32.6299	25.6043	0.744606	0.368274
32.7875	28.1511	0.748202	0.404905
32.9451	30.5252	0.751799	0.439052
33.1028	23.5755	0.755397	0.339093
33.2604	27.7482	0.758994	0.39911
33.418	26.0576	0.76259	0.374794
33.5757	23.6403	0.766189	0.340025
33.7333	22.0072	0.769785	0.316536
33.8909	25.036	0.773382	0.3601
34.0486	31.4101	0.77698	0.45178
34.2062	32.4964	0.780577	0.467405
34.3638	28	0.784173	0.402732
34.5215	22.1151	0.787772	0.318088
34.6791	31.1583	0.791368	0.448158
34.8367	31.0935	0.794965	0.447226
34.9943	23.8993	0.798561	0.34375
35.152	24	0.80216	0.345199
35.3096	27.1583	0.805756	0.390625
35.4672	27.3525	0.809352	0.393419
35.6249	22.6691	0.812951	0.326056
35.7825	24.2734	0.816548	0.349131
35.9401	26.4101	0.820144	0.379864
36.0978	22.4029	0.823743	0.322227
36.2554	18.2518	0.827339	0.262521
36.413	20.1007	0.830935	0.289114
36.5707	22	0.834534	0.316432
36.7283	20.2662	0.83813	0.291494
36.8859	25.1367	0.841727	0.361548
37.0436	24.1655	0.845325	0.347579
37.2012	24.2302	0.848922	0.34851
37.3588	23.8058	0.852518	0.342405
37.5165	23.0144	0.856117	0.331022
37.6741	23.0719	0.859713	0.331849
37.8317	28.482	0.86331	0.409664
37.9894	21.5468	0.866908	0.309914
38.147	24.6259	0.870505	0.354201
38.3046	28	0.874101	0.402732
38.4623	25.7266	0.8777	0.370033
38.6199	23.3669	0.881296	0.336093
38.7775	23	0.884893	0.330815
38.9352	23.3669	0.888491	0.336093
39.0928	17.4676	0.892088	0.251241
39.2504	15.8417	0.895684	0.227856
39.408	17	0.89928	0.244516
39.5657	20.2806	0.902879	0.291701
39.7233	17.2374	0.906476	0.24793
39.8809	19.554	0.910072	0.281251
40.0386	18	0.913671	0.258899
40.1962	20.8921	0.917267	0.300497
40.3538	18.4029	0.920863	0.264694
40.5115	24.5971	0.924462	0.353787
40.6691	17.0504	0.928058	0.245241
40.8267	20.1295	0.931655	0.289528
40.9844	31.8777	0.935254	0.458506
41.142	18.4317	0.93885	0.265108
41.2996	17.8058	0.942446	0.256106
41.4573	16.7338	0.946045	0.240687
41.6149	26.7554	0.949641	0.38483
41.7725	17.9281	0.953238	0.257865
41.9302	19.813	0.956836	0.284976
42.0878	18.3237	0.960433	0.263555
42.2454	16.9928	0.964029	0.244412
42.4031	15.6403	0.967628	0.224959
42.5607	18.2086	0.971224	0.261899
42.7183	25.6547	0.974821	0.368999
42.876	15.9065	0.978419	0.228788
43.0336	21.5252	0.982016	0.309603
43.1912	23.3957	0.985612	0.336507
43.3489	16	0.989211	0.230132
43.5065	22.7986	0.992807	0.327919
43.6641	24.8993	0.996404	0.358133
43.8217	25	1	0.359582

## Sheet: 8-cells telophase
Embryo 1				Embryo 2
X	Y			X	Y
0	42	0	0.578527	0	31	0	0.492063
0.1531	34.0957	0.0123463	0.469649	0.1531	31.0947	0.00769266	0.493567
0.3062	32.5431	0.0246926	0.448263	0.3062	32.5444	0.0153853	0.516578
0.4593	36.0398	0.0370388	0.496428	0.4593	31.929	0.023078	0.50681
0.6124	30.825	0.0493851	0.424597	0.6124	33.3728	0.0307706	0.529727
0.7655	31.4021	0.0617314	0.432547	0.7655	30.9645	0.0384633	0.4915
0.9186	34.7407	0.0740777	0.478534	0.9186	32.3195	0.0461559	0.513008
1.0716	34.6222	0.0864159	0.476902	1.0716	32.6568	0.0538436	0.518362
1.2247	32.2247	0.0987621	0.443877	1.2247	30.1006	0.0615362	0.477787
1.3778	44.4321	0.111108	0.612028	1.3778	32.1479	0.0692289	0.510284
1.5309	41.2204	0.123455	0.567788	1.5309	34.6213	0.0769215	0.549544
1.684	39.2923	0.135801	0.54123	1.684	32.0533	0.0846142	0.508783
1.8371	39.2263	0.148147	0.540321	1.8371	33.4734	0.0923068	0.531324
1.9902	40.8889	0.160494	0.563222	1.9902	34	0.0999995	0.539683
2.1433	41.7427	0.17284	0.574983	2.1433	36.142	0.107692	0.573683
2.2964	35.8793	0.185186	0.494217	2.2964	36.6391	0.115385	0.581573		Middle point = cell-cell contacts
2.4495	40.2064	0.197532	0.553821	2.4495	29.6923	0.123077	0.471306
2.6026	38.9224	0.209879	0.536135	2.6026	30.7515	0.13077	0.488119
2.7557	31.3457	0.222225	0.43177	2.7557	35.1953	0.138463	0.558656
2.9088	32.7491	0.234571	0.451101	2.9088	35.4438	0.146155	0.5626
3.0619	32.1768	0.246917	0.443218	3.0619	34.7278	0.153848	0.551235
3.2149	30.0247	0.259256	0.413574	3.2149	36.0947	0.161536	0.572932
3.368	30.1297	0.271602	0.41502	3.368	37.5562	0.169228	0.59613
3.5211	31.8224	0.283948	0.438336	3.5211	41.5325	0.176921	0.659246
3.6742	34.1701	0.296295	0.470674	3.6742	32.6864	0.184614	0.518832
3.8273	34.474	0.308641	0.47486	3.8273	30.7456	0.192306	0.488025
3.9804	33.3728	0.320987	0.459692	3.9804	28	0.199999	0.444444
4.1335	33	0.333333	0.454557	4.1335	34.0651	0.207692	0.540716
4.2866	33.13	0.34568	0.456347	4.2866	37.0533	0.215384	0.588148
4.4397	30.5453	0.358026	0.420745	4.4397	30.3432	0.223077	0.481638
4.5928	34.5021	0.370372	0.475247	4.5928	31.4497	0.23077	0.499202
4.7459	32.9169	0.382718	0.453412	4.7459	32.929	0.238462	0.522683
4.899	32.4205	0.395065	0.446574	4.899	33.1302	0.246155	0.525876
5.0521	33.546	0.407411	0.462078	5.0521	36.1775	0.253848	0.574246
5.2052	30.9717	0.419757	0.426618	5.2052	39.9586	0.26154	0.634263
5.3582	33.6283	0.432095	0.463211	5.3582	41.8106	0.269228	0.66366
5.5113	35.9259	0.444442	0.494859	5.5113	33.7692	0.276921	0.536019
5.6644	35.4419	0.456788	0.488193	5.6644	36.0473	0.284613	0.572179
5.8175	40.2736	0.469134	0.554747	5.8175	36.568	0.292306	0.580444
5.9706	39.0082	0.481481	0.537316	5.9706	41	0.299998	0.650794
6.1237	41.6875	0.493827	0.574222	6.1237	37.7101	0.307691	0.598573
6.2768	43.6316	0.506173	0.601001	6.2768	37.2722	0.315384	0.591622
6.4299	42.6872	0.518519	0.587993	6.4299	43.7574	0.323076	0.694562
6.583	42.5769	0.530866	0.586473	6.583	44.7337	0.330769	0.710059
6.7361	43.0748	0.543212	0.593332	6.7361	37.5148	0.338462	0.595473
6.8892	44.4444	0.555558	0.612197	6.8892	28.5858	0.346154	0.453743
7.0423	46.9761	0.567905	0.64707	7.0423	30.4793	0.353847	0.483798
7.1954	52.1076	0.580251	0.717753	7.1954	32.2663	0.36154	0.512163
7.3484	60.8025	0.592589	0.837521	7.3484	33.5325	0.369227	0.532262
7.5015	72.5982	0.604935	1	7.5015	36.9172	0.37692	0.585987
7.6546	61.0777	0.617282	0.841311	7.6546	37.3609	0.384613	0.59303
7.8077	45.0329	0.629628	0.620303	7.8077	37.4911	0.392305	0.595097
7.9608	42.126	0.641974	0.580262	7.9608	63	0.399998	1
8.1139	35.9233	0.65432	0.494824	8.1139	50.3136	0.407691	0.798629
8.267	31.1111	0.666667	0.428538	8.267	49.6272	0.415383	0.787733
8.4201	36.3438	0.679013	0.500616	8.4201	51.3314	0.423076	0.814784
8.5732	33.3047	0.691359	0.458754	8.5732	50.3254	0.430769	0.798816
8.7263	33.0562	0.703705	0.455331	8.7263	46.2071	0.438461	0.733446
8.8794	32.8302	0.716052	0.452218	8.8794	50.2959	0.446154	0.798348
9.0325	36.2166	0.728398	0.498864	9.0325	55.8106	0.453847	0.885883
9.1856	32.2634	0.740744	0.44441	9.1856	50.7574	0.461539	0.805673
9.3387	34.8362	0.753091	0.479849	9.3387	45.9527	0.469232	0.729408
9.4917	34.9627	0.765429	0.481592	9.4917	38.6864	0.47692	0.61407
9.6448	31.2099	0.777775	0.429899	9.6448	40.2722	0.484612	0.639241
9.7979	33.75	0.790121	0.464888	9.7979	41.0059	0.492305	0.650887
9.951	35.1318	0.802468	0.483921	9.951	33	0.499997	0.52381
10.1041	37.4966	0.814814	0.516495	10.1041	34.8698	0.50769	0.553489
10.2572	35.1853	0.82716	0.484658	10.2572	36.503	0.515383	0.579413
10.4103	33.537	0.839506	0.461954	10.4103	31.1183	0.523075	0.493941
10.5634	37.8683	0.851853	0.521615	10.5634	32.7574	0.530768	0.519959
10.7165	38.1805	0.864199	0.525915	10.7165	33.0769	0.538461	0.52503
10.8696	41.2227	0.876545	0.56782	10.8696	31.2426	0.546153	0.495914
11.0227	35.2222	0.888892	0.485166	11.0227	31.574	0.553846	0.501175
11.1758	33.2568	0.901238	0.458094	11.1758	33.9704	0.561539	0.539213
11.3289	35.6987	0.913584	0.49173	11.3289	34.3787	0.569231	0.545694
11.482	37.3429	0.92593	0.514378	11.482	32.5325	0.576924	0.516389
11.635	34.0027	0.938269	0.468368	11.635	36.6035	0.584612	0.581008
11.7881	37.2059	0.950615	0.512491	11.7881	34.0414	0.592304	0.54034
11.9412	39.5775	0.962961	0.545158	11.9412	33	0.599997	0.52381
12.0943	37.3827	0.975307	0.514926	12.0943	30.9704	0.60769	0.491594
12.2474	32.8057	0.987654	0.45188	12.2474	34.4675	0.615382	0.547103
12.4005	38	1	0.523429	12.4005	33.284	0.623075	0.528317
				12.5536	30.8698	0.630768	0.489997
				12.7067	30.3373	0.63846	0.481544
				12.8598	30.071	0.646153	0.477317
				13.0129	30.1834	0.653846	0.479102
				13.166	29.503	0.661538	0.468302
				13.3191	30.1893	0.669231	0.479195
				13.4722	27.4497	0.676924	0.43571
				13.6253	29.5266	0.684616	0.468676
				13.7783	32.8047	0.692304	0.52071
				13.9314	33	0.699996	0.52381
				14.0845	28.2899	0.707689	0.449046
				14.2376	32.497	0.715382	0.515825
				14.3907	38.142	0.723074	0.605429
				14.5438	35.9823	0.730767	0.571148
				14.6969	33.142	0.73846	0.526063
				14.85	31.8107	0.746152	0.504932
				15.0031	31.3136	0.753845	0.497041
				15.1562	30.4142	0.761538	0.482765
				15.3093	29.3373	0.76923	0.465671
				15.4624	30.213	0.776923	0.479571
				15.6155	28.5858	0.784616	0.453743
				15.7685	36.4911	0.792303	0.579224
				15.9216	34	0.799996	0.539683
				16.0747	30.0059	0.807689	0.476284
				16.2278	31.7751	0.815381	0.504367
				16.3809	28.9586	0.823074	0.45966
				16.534	31.3965	0.830767	0.498357
				16.6871	33.645	0.838459	0.534048
				16.8402	32.787	0.846152	0.520429
				16.9933	34.6391	0.853845	0.549827
				17.1464	34.7456	0.861537	0.551517
				17.2995	32.9704	0.86923	0.52334
				17.4526	33.0651	0.876923	0.524843
				17.6057	31.7929	0.884615	0.504649
				17.7588	35.3314	0.892308	0.560816
				17.9118	35	0.899995	0.555556
				18.0649	35.9527	0.907688	0.570678
				18.218	38.5385	0.915381	0.611722
				18.3711	36.9467	0.923073	0.586456
				18.5242	38.2781	0.930766	0.607589
				18.6773	35.0059	0.938459	0.555649
				18.8304	33.9053	0.946151	0.538179
				18.9835	32.8166	0.953844	0.520898
				19.1366	30.6509	0.961537	0.486522
				19.2897	33.5621	0.969229	0.532732
				19.4428	33.8521	0.976922	0.537335
				19.5959	37.8166	0.984615	0.600263
				19.749	34.7515	0.992307	0.551611
				19.9021	33	1	0.52381

## Sheet: 60-cells metaphase
Embryo 1				Embryo 2
X	Y			X	Y
0	34	0	0.707682	0	32	0	0.573088
0.1531	31.8629	0.0103098	0.6632	0.1531	28	0.0112364	0.501452
0.3062	32.9734	0.0206195	0.686314	0.3062	28.0749	0.0224729	0.502794
0.4593	34.029	0.0309293	0.708285	0.4593	29.5711	0.0337093	0.529589
0.6124	29.4403	0.0412391	0.612775	0.6124	26.9438	0.0449458	0.482537
0.7655	32.8167	0.0515488	0.683052	0.7655	28.358	0.0561822	0.507864
0.9186	33.8704	0.0618586	0.704984	0.9186	29.6147	0.0674187	0.53037
1.0716	38.5928	0.0721616	0.803277	1.0716	28.9775	0.0786478	0.518958
1.2247	31.0149	0.0824714	0.645549	1.2247	31.9116	0.0898843	0.571505
1.3778	38.1453	0.0927811	0.793963	1.3778	29.0562	0.101121	0.520368
1.5309	32.4965	0.103091	0.676388	1.5309	33.7364	0.112357	0.604186
1.684	36.8324	0.113401	0.766636	1.684	25.1019	0.123594	0.44955
1.8371	34.0752	0.12371	0.709247	1.8371	22.6663	0.13483	0.405931
1.9902	33.7409	0.13402	0.702289	1.9902	26.1939	0.146067	0.469107
2.1433	34.8149	0.14433	0.724643	2.1433	27.9177	0.157303	0.499979
2.2964	32.6495	0.15464	0.679572	2.2964	21.5397	0.168539	0.385755
2.4495	39.2784	0.164949	0.817547	2.4495	29.2757	0.179776	0.524299
2.6026	34.3444	0.175259	0.71485	2.6026	30.0605	0.191012	0.538354
2.7557	34.6189	0.185569	0.720564	2.7557	26.6494	0.202249	0.477265		Middle point = cell-cell contacts
2.9088	31.1443	0.195879	0.648243	2.9088	32.833	0.213485	0.588007
3.0619	29.5889	0.206189	0.615868	3.0619	32.9275	0.224722	0.589699
3.2149	32.0046	0.216492	0.666149	3.2149	30.2642	0.235951	0.542002
3.368	29.6688	0.226801	0.617531	3.368	30.9025	0.247187	0.553433
3.5211	25.1593	0.237111	0.52367	3.5211	30.1844	0.258424	0.540573
3.6742	27.0817	0.247421	0.563683	3.6742	33.0282	0.26966	0.591503
3.8273	23.5492	0.257731	0.490157	3.8273	30.9201	0.280897	0.553749
3.9804	27.0265	0.26804	0.562534	3.9804	29.9099	0.292133	0.535657
4.1335	29.1404	0.27835	0.606533	4.1335	35.0042	0.303369	0.626891
4.2866	27.1134	0.28866	0.564343	4.2866	36.4646	0.314606	0.653045
4.4397	29.8905	0.29897	0.622146	4.4397	36.4785	0.325842	0.653294
4.5928	32.7216	0.309279	0.681073	4.5928	40.4893	0.337079	0.725123
4.7459	34.0546	0.319589	0.708818	4.7459	43.9384	0.348315	0.786893
4.899	37.1309	0.329899	0.772849	4.899	45.7649	0.359552	0.819604
5.0521	32.7116	0.340209	0.680865	5.0521	42.1495	0.370788	0.754856
5.2052	31.241	0.350519	0.650255	5.2052	38.1047	0.382025	0.682418
5.3582	34.9238	0.360822	0.72691	5.3582	43.0586	0.393254	0.771137
5.5113	35.9381	0.371131	0.748022	5.5113	42.43	0.40449	0.75988
5.6644	39.6701	0.381441	0.8257	5.6644	40.4807	0.415727	0.724969
5.8175	40.3463	0.391751	0.839775	5.8175	42.2853	0.426963	0.757288
5.9706	42.5556	0.402061	0.885759	5.9706	45.8169	0.4382	0.820536
6.1237	48.0442	0.41237	1	6.1237	44.2684	0.449436	0.792803
6.2768	43.3249	0.42268	0.901772	6.2768	39.5809	0.460672	0.708855
6.4299	40.7981	0.43299	0.849178	6.4299	41.415	0.471909	0.741702
6.583	41.4982	0.4433	0.86375	6.583	46.938	0.483145	0.840613
6.7361	35.904	0.453609	0.747312	6.7361	47.7736	0.494382	0.855578
6.8892	33.8124	0.463919	0.703777	6.8892	50.8013	0.505618	0.909801
7.0423	33.703	0.474229	0.7015	7.0423	54.148	0.516855	0.969737
7.1954	30.1237	0.484539	0.627	7.1954	54.6858	0.528091	0.979369
7.3484	28.5876	0.494842	0.595027	7.3484	55.8378	0.53932	1
7.5015	31.9198	0.505152	0.664384	7.5015	51.8171	0.550557	0.927993
7.6546	32.2358	0.515461	0.670961	7.6546	49.8696	0.561793	0.893115
7.8077	35.0497	0.525771	0.72953	7.8077	45.6772	0.57303	0.818034
7.9608	35.6598	0.536081	0.742229	7.9608	44.0723	0.584266	0.789291
8.1139	32.5844	0.546391	0.678217	8.1139	39.478	0.595502	0.707012
8.267	35.7671	0.5567	0.744462	8.267	35.1822	0.606739	0.630079
8.4201	34.1502	0.56701	0.710808	8.4201	36.5393	0.617975	0.654383
8.5732	30.1005	0.57732	0.626517	8.5732	37.5427	0.629212	0.672353
8.7263	36.8447	0.58763	0.766892	8.7263	40.6189	0.640448	0.727444
8.8794	36.9224	0.597939	0.768509	8.8794	38.9514	0.651685	0.697581
9.0325	35.6319	0.608249	0.741648	9.0325	36.1911	0.662921	0.648147
9.1856	33.558	0.618559	0.698482	9.1856	36.1886	0.674158	0.648102
9.3387	34.0537	0.628869	0.708799	9.3387	37.1155	0.685394	0.664702
9.4917	27.7216	0.639172	0.577002	9.4917	34.873	0.696623	0.624541
9.6448	27.8319	0.649481	0.579298	9.6448	33.6365	0.70786	0.602397
9.7979	26.2693	0.659791	0.546774	9.7979	44.8703	0.719096	0.803583
9.951	28.4778	0.670101	0.592742	9.951	41.8637	0.730333	0.749738
10.1041	26.101	0.680411	0.543271	10.1041	31.8635	0.741569	0.570644
10.2572	27.8805	0.690721	0.580309	10.2572	31.7731	0.752805	0.569025
10.4103	29.6667	0.70103	0.617488	10.4103	33.5268	0.764042	0.600432
10.5634	27.5528	0.71134	0.573489	10.5634	34.2043	0.775278	0.612565
10.7165	27.0098	0.72165	0.562186	10.7165	33.6853	0.786515	0.603271
10.8696	25.2113	0.73196	0.524752	10.8696	28.3981	0.797751	0.508582
11.0227	30.4986	0.742269	0.634803	11.0227	32.5118	0.808988	0.582254
11.1758	33.4013	0.752579	0.69522	11.1758	36.4075	0.820224	0.652022
11.3289	29.7159	0.762889	0.618512	11.3289	37.1433	0.831461	0.6652
11.482	33.7157	0.773199	0.701764	11.482	31.7697	0.842697	0.568964
11.635	36.5041	0.783502	0.759802	11.635	35.5477	0.853926	0.636624
11.7881	28.7979	0.793811	0.599404	11.7881	39.5545	0.865163	0.708382
11.9412	30.8184	0.804121	0.641459	11.9412	30.6528	0.876399	0.548961
12.0943	30.8817	0.814431	0.642777	12.0943	27.9754	0.887636	0.501012
12.2474	28.3271	0.824741	0.589605	12.2474	30.2284	0.898872	0.541361
12.4005	29.5963	0.835051	0.616022	12.4005	33.6742	0.910108	0.603072
12.5536	34.0201	0.84536	0.7081	12.5536	34.5402	0.921345	0.618581
12.7067	25.1473	0.85567	0.52342	12.7067	28.2659	0.932581	0.506214
12.8598	26.8534	0.86598	0.558931	12.8598	28.3565	0.943818	0.507837
13.0129	29.0005	0.87629	0.603621	13.0129	33.1627	0.955054	0.593911
13.166	29.7467	0.886599	0.619153	13.166	28.9944	0.966291	0.519261
13.3191	32.2477	0.896909	0.671209	13.3191	28.4402	0.977527	0.509336
13.4722	31.0952	0.907219	0.647221	13.4722	25.8889	0.988764	0.463645
13.6253	29.1747	0.917529	0.607247	13.6253	36	1	0.644725
13.7783	25.723	0.927832	0.535403
13.9314	34.3301	0.938141	0.714552
14.0845	30.3792	0.948451	0.632318
14.2376	27.797	0.958761	0.578571
14.3907	30.5681	0.969071	0.63625
14.5438	27.3271	0.97938	0.568791
14.6969	30.5127	0.98969	0.635096
14.85	24	1	0.49954

## Sheet: 60-cells telophase
1				2				3				4				5
X2	Y			X	Y			X	Y			X	Y			X	Y
0	18	0	0.711153	0	5	0	0.242605	0	12	0	0.532874	0	41	0	0.560344	0	28	0	0.629535
0.1486	15.05	0.0128245	0.594603	0.1486	8.4347	0.0133375	0.409261	0.1486	13.0847	0.0135178	0.581041	0.16217	42.4862	0.0163933	0.580656	0.16217	34.014	0.0163933	0.76475
0.2971	14.4425	0.0256404	0.570602	0.2971	7.1771	0.0266661	0.348241	0.2971	13.9116	0.0270265	0.617761	0.32434	39.8073	0.0327866	0.544044	0.32434	31.9667	0.0327866	0.718719
0.4457	14.6627	0.0384649	0.579301	0.4457	8.3056	0.0400036	0.402997	0.4457	12.1592	0.0405444	0.539943	0.48651	40.1578	0.0491798	0.548834	0.48651	28.6455	0.0491798	0.644048
0.5942	16.2341	0.0512807	0.641385	0.5942	5.4011	0.0533321	0.262067	0.5942	13.7882	0.0540531	0.612281	0.64869	36.4899	0.0655741	0.498705	0.64869	25.7272	0.0655741	0.578434
0.7428	13.7797	0.0641052	0.544415	0.7428	7.48	0.0666697	0.362938	0.7428	13.6311	0.0675709	0.605305	0.81086	41.1862	0.0819674	0.562889	0.81086	30.6213	0.0819674	0.68847
0.8913	11.7041	0.0769211	0.462412	0.8913	8.8624	0.0799982	0.430013	0.8913	13.5077	0.0810796	0.599825	0.97303	42.7235	0.0983607	0.583899	0.97303	30.3488	0.0983607	0.682344
1.0399	15.8297	0.0897456	0.625408	1.0399	3.6373	0.0933357	0.176486	1.0399	15.0044	0.0945974	0.666288	1.1352	41.8108	0.114754	0.571425	1.1352	28.7853	0.114754	0.647191
1.1884	11.4076	0.102561	0.450697	1.1884	4.4981	0.106664	0.218253	1.1884	15.6801	0.108106	0.696293	1.29737	44.0322	0.131147	0.601785	1.29737	33.344	0.131147	0.749686
1.337	13.0118	0.115386	0.514077	1.337	8.512	0.120002	0.413011	1.337	16.9613	0.121624	0.753186	1.45955	48	0.147542	0.656013	1.45955	34.2878	0.147542	0.770906
1.4855	15.071	0.128202	0.595433	1.4855	4.9067	0.13333	0.238078	1.4855	14.7604	0.135133	0.655453	1.62172	49.738	0.163935	0.679766	1.62172	31.4472	0.163935	0.707039
1.6341	13.6542	0.141026	0.539457	1.6341	5.5872	0.146668	0.271097	1.6341	15.0898	0.14865	0.67008	1.78389	52.7587	0.180328	0.72105	1.78389	26.4725	0.180328	0.595191
1.7826	12.8402	0.153842	0.507297	1.7826	6.0608	0.159996	0.294077	1.7826	14.6757	0.162159	0.651691	1.94606	44.2593	0.196721	0.604889	1.94606	33.3298	0.196721	0.749367
1.9312	13.2222	0.166667	0.522389	1.9312	7.7312	0.173334	0.375126	1.9312	17.3411	0.175677	0.770052	2.10823	47.5724	0.213115	0.650169	2.10823	29.8947	0.213115	0.672134
2.0797	13.4326	0.179483	0.530702	2.0797	6.9557	0.186662	0.337498	2.0797	14.9423	0.189186	0.66353	2.2704	48.9481	0.229508	0.66897	2.2704	30.9567	0.229508	0.696011
2.2283	12.858	0.192307	0.508	2.2283	8.16	0.2	0.395932	2.2283	17.1848	0.202704	0.763111	2.43257	55.6211	0.245901	0.76017	2.43257	37.3058	0.245901	0.83876
2.3769	17.4839	0.205132	0.690763	2.3769	9.3648	0.213338	0.45439	2.3769	14.5917	0.216221	0.647961	2.59475	54.3811	0.262295	0.743223	2.59475	34.7963	0.262295	0.782338
2.5254	14.3623	0.217947	0.567433	2.5254	11.2624	0.226666	0.546464	2.5254	16.5142	0.22973	0.733332	2.75692	52.2634	0.278689	0.71428	2.75692	30.4241	0.278689	0.684037
2.674	15.5207	0.230772	0.6132	2.674	8.6224	0.240004	0.418368	2.674	15.1066	0.243248	0.670826	2.91909	53.1352	0.295082	0.726195	2.91909	26.3929	0.295082	0.593402
2.8225	15.3918	0.243588	0.608107	2.8225	10.1381	0.253332	0.491912	2.8225	14.3828	0.256757	0.638685	3.08126	49.8345	0.311475	0.681085	3.08126	26.6622	0.311475	0.599456
2.9711	16.5141	0.256412	0.652448	2.9711	7.96	0.26667	0.386228	2.9711	15.7436	0.270274	0.699113	3.24343	38.5757	0.327869	0.527212	3.24343	26.3037	0.327869	0.591396
3.1196	18.7929	0.269228	0.74248	3.1196	6.5312	0.279998	0.316901	3.1196	16.8327	0.283783	0.747476	3.40561	40.4878	0.344263	0.553344	3.40561	38.1328	0.344263	0.857354
3.2682	16.1538	0.282053	0.638213	3.2682	12.6853	0.293336	0.615504	3.2682	13.6976	0.297301	0.608258	3.56778	46.104	0.360656	0.6301	3.56778	34.581	0.360656	0.777498
3.4167	17.0605	0.294868	0.674035	3.4167	10.3621	0.306664	0.50278	3.4167	16.6413	0.31081	0.738976	3.72995	39.3703	0.377049	0.538071	3.72995	38.8807	0.377049	0.87417
3.5653	13.2899	0.307693	0.525064	3.5653	11.0464	0.320002	0.535983	3.5653	14.2206	0.324328	0.631482	3.89212	38.6235	0.393443	0.527865	3.89212	42.5249	0.393443	0.956103
3.7138	15.8974	0.320509	0.628083	3.7138	7	0.33333	0.339648	3.7138	16.2761	0.337836	0.722759	4.05429	41.0981	0.409836	0.561685	4.05429	38.7947	0.409836	0.872236
3.8624	18.6667	0.333333	0.737494	3.8624	12.0112	0.346668	0.582796	3.8624	13.9598	0.351354	0.619901	4.21646	54.8906	0.426229	0.750186	4.21646	44.4773	0.426229	1
4.0109	17.4438	0.346149	0.689179	4.0109	9.7136	0.359996	0.471314	4.0109	15.7159	0.364863	0.697883	4.37863	61.6015	0.442623	0.841904	4.37863	41.0481	0.442623	0.9229
4.1595	16.5582	0.358974	0.65419	4.1595	11.2192	0.373334	0.544368	4.1595	18.2053	0.378381	0.808427	4.54081	64.8355	0.459017	0.886103	4.54081	37.4972	0.459017	0.843064
4.308	18.8323	0.37179	0.744036	4.308	9.6181	0.386662	0.466681	4.308	16.4945	0.391889	0.732457	4.70298	62.3362	0.47541	0.851945	4.70298	44.3158	0.47541	0.996369
4.4566	19.8166	0.384614	0.782924	4.4566	9.52	0.4	0.461921	4.4566	14.8437	0.405407	0.659152	4.86515	62.2451	0.491803	0.8507	4.86515	36.9	0.491803	0.829637
4.6051	13.789	0.39743	0.544783	4.6051	12.9184	0.413329	0.626815	4.6051	14.1483	0.418916	0.628272	5.02732	57.7829	0.508197	0.789715	5.02732	40.8554	0.508197	0.918567
4.7537	20.3669	0.410254	0.804666	4.7537	19.5408	0.426666	0.948141	4.7537	15.6742	0.432434	0.696031	5.18949	73.1693	0.52459	1	5.18949	30.5329	0.52459	0.686483
4.9023	14.3195	0.423079	0.565742	4.9023	14.4688	0.440004	0.702042	4.9023	20.366	0.445951	0.904376	5.35167	61.7654	0.540984	0.844144	5.35167	33.1483	0.540984	0.745286
5.0508	17.4918	0.435895	0.691075	5.0508	13.5979	0.453332	0.659785	5.0508	19.4339	0.45946	0.862985	5.51384	54.6442	0.557377	0.746819	5.51384	35.7947	0.557377	0.804786
5.1994	18.0256	0.448719	0.712165	5.1994	17.4267	0.46667	0.845562	5.1994	19.122	0.472978	0.849135	5.67601	59.2319	0.573771	0.809518	5.67601	32.1419	0.573771	0.722659
5.3479	19.2367	0.461535	0.760013	5.3479	20.6096	0.479998	1	5.3479	18.3009	0.486487	0.812673	5.83818	46.4499	0.590164	0.634828	5.83818	32.0943	0.590164	0.721588
5.4965	21.6857	0.47436	0.85677	5.4965	13.2533	0.493336	0.643064	5.4965	22	0.500005	0.976935	6.00035	48.0218	0.606557	0.656311	6.00035	34.4942	0.606557	0.775546
5.645	21.6989	0.487176	0.857291	5.645	10.72	0.506664	0.520146	5.645	22.4967	0.513513	0.998992	6.16252	50.5657	0.622951	0.691078	6.16252	33.8025	0.622951	0.759994
5.7936	20	0.5	0.79017	5.7936	13.8832	0.520002	0.673628	5.7936	20.7305	0.527031	0.920562	6.3247	47.6068	0.639345	0.650639	6.3247	34.4794	0.639345	0.775213
5.9421	22.8521	0.512816	0.902853	5.9421	11.72	0.53333	0.568667	5.9421	20.1066	0.54054	0.892857	6.48687	54.6799	0.655738	0.747307	6.48687	32.6122	0.655738	0.733232
6.0907	25.311	0.52564	1	6.0907	10.8304	0.546668	0.525503	6.0907	17.6611	0.554058	0.784262	6.64904	54.7399	0.672131	0.748127	6.64904	29.2104	0.672131	0.656748
6.2392	20.6035	0.538456	0.814014	6.2392	12.1488	0.559996	0.589473	6.2392	19.0541	0.567566	0.846119	6.81121	52.6635	0.688525	0.719749	6.81121	29.8334	0.688525	0.670756
6.3878	17.0506	0.551281	0.673644	6.3878	13.5941	0.573334	0.6596	6.3878	22.5194	0.581084	1	6.97338	46.6751	0.704918	0.637906	6.97338	31.5582	0.704918	0.709535
6.5363	15.3642	0.564097	0.607017	6.5363	11.9557	0.586662	0.580103	6.5363	21.3126	0.594593	0.946411	7.13555	49.1647	0.721311	0.671931	7.13555	34.047	0.721311	0.765492
6.6849	16.0947	0.576921	0.635878	6.6849	13	0.6	0.630774	6.6849	18.2126	0.608111	0.808752	7.29772	52.9766	0.737705	0.724028	7.29772	33.8737	0.737705	0.761595
6.8334	17.3097	0.589737	0.683881	6.8334	15.144	0.613329	0.734803	6.8334	17.9576	0.621619	0.797428	7.4599	48.8116	0.754099	0.667105	7.4599	34.8557	0.754099	0.783674
6.982	15.0178	0.602561	0.593331	6.982	10.0635	0.626666	0.488292	6.982	19.4061	0.635137	0.86175	7.62207	45.7678	0.770492	0.625506	7.62207	32.6842	0.770492	0.734851
7.1306	17.2189	0.615386	0.680293	7.1306	12.976	0.640004	0.62961	7.1306	15.5077	0.648655	0.688637	7.78424	43.0427	0.786885	0.588262	7.78424	30.437	0.786885	0.684327
7.2791	15.9112	0.628202	0.628628	7.2791	12.3435	0.653332	0.59892	7.2791	14.832	0.662164	0.658632	7.94641	46.0105	0.803279	0.628822	7.94641	32.2424	0.803279	0.724918
7.4277	18.9665	0.641026	0.749338	7.4277	16	0.66667	0.776337	7.4277	16.7173	0.675682	0.742351	8.10858	46.7049	0.819672	0.638313	8.10858	28.5466	0.819672	0.641824
7.5762	18.3254	0.653842	0.724009	7.5762	13.6784	0.679998	0.663691	7.5762	14.2169	0.68919	0.631318	8.27075	48.5222	0.836065	0.66315	8.27075	29.9175	0.836065	0.672646
7.7248	16.4444	0.666667	0.649694	7.7248	6.4448	0.693336	0.312709	7.7248	16.4164	0.702708	0.728989	8.43293	45.1231	0.852459	0.616694	8.43293	34.3762	0.852459	0.772893
7.8733	13.3866	0.679483	0.528885	7.8733	11.6715	0.706664	0.566314	7.8733	18.7531	0.716217	0.832753	8.5951	46.9092	0.868853	0.641105	8.5951	33.5318	0.868853	0.753908
8.0219	16.5444	0.692307	0.653645	8.0219	10.48	0.720002	0.508501	8.0219	18.0453	0.729735	0.801322	8.75727	48.7286	0.885246	0.665971	8.75727	29.1497	0.885246	0.655384
8.1704	15.3274	0.705123	0.605563	8.1704	5.2533	0.73333	0.254896	8.1704	18.3243	0.743243	0.813712	8.91944	54.9573	0.901639	0.751098	8.91944	27.8345	0.901639	0.625814
8.319	13.4096	0.717947	0.529793	8.319	4.2645	0.746668	0.206918	8.319	20.4193	0.756761	0.906743	9.08161	57.7845	0.918033	0.789737	9.08161	31.5904	0.918033	0.710259
8.4675	13.1598	0.730763	0.519924	8.4675	5.2224	0.759996	0.253396	8.4675	22.3543	0.77027	0.992669	9.24378	56.3744	0.934426	0.770465	9.24378	26.584	0.934426	0.597698
8.6161	15.5773	0.743588	0.615436	8.6161	9.3557	0.773334	0.453949	8.6161	15.4916	0.783788	0.687922	9.40596	61.0005	0.95082	0.83369	9.40596	22.7299	0.95082	0.511045
8.7646	14.4668	0.756404	0.571562	8.7646	6.8075	0.786662	0.330307	8.7646	16.8875	0.797296	0.749909	9.56813	46.4931	0.967213	0.635418	9.56813	28.0016	0.967213	0.629571
8.9132	14.0828	0.769228	0.556391	8.9132	9	0.8	0.43669	8.9132	15.5274	0.810814	0.689512	9.7303	43.531	0.983607	0.594935	9.7303	30.8664	0.983607	0.693981
9.0617	13.6121	0.782044	0.537794	9.0617	10.7067	0.813329	0.519501	9.0617	16.9459	0.824323	0.752502	9.89247	41	1	0.560344	9.89247	30	1	0.674501
9.2103	12.3984	0.794868	0.489842	9.2103	11.2507	0.826666	0.545896	9.2103	17.0825	0.837841	0.758568
9.3589	13.4734	0.807693	0.532314	9.3589	10.5792	0.840004	0.513314	9.3589	14.6837	0.851359	0.652047
9.5074	13.9244	0.820509	0.550132	9.5074	12.2635	0.853332	0.595038	9.5074	13.2768	0.864867	0.589572
9.656	11.6667	0.833333	0.460934	9.656	11.3333	0.86667	0.549904	9.656	15.5011	0.878385	0.688344
9.8045	14.2367	0.846149	0.562471	9.8045	8.1696	0.879998	0.396398	9.8045	15.0307	0.891894	0.667456
9.9531	15.5845	0.858974	0.61572	9.9531	8.3189	0.893336	0.403642	9.9531	14.4003	0.905412	0.639462
10.1016	18.1479	0.87179	0.716997	10.1016	6.7136	0.906664	0.325751	10.1016	12.2337	0.91892	0.543252
10.2502	16.8284	0.884614	0.664865	10.2502	14.7568	0.920002	0.716016	10.2502	12.3893	0.932438	0.550161
10.3987	13.7304	0.89743	0.542468	10.3987	10.8133	0.93333	0.524673	10.3987	12.4843	0.945947	0.55438
10.5473	18.3794	0.910254	0.726143	10.5473	8.0939	0.946668	0.392725	10.5473	10.683	0.959465	0.474391
10.6958	13.5266	0.92307	0.534416	10.6958	4.5728	0.959996	0.221877	10.6958	12.6289	0.972973	0.560801
10.8444	14.7285	0.935895	0.581901	10.8444	5.6757	0.973334	0.275391	10.8444	13.6815	0.986491	0.607543
10.9929	15.8475	0.948711	0.626111	10.9929	7.0416	0.986662	0.341666	10.9929	11	1	0.488468
11.1415	15.9172	0.961535	0.628865	11.1415	13	1	0.630774
11.29	16.641	0.974351	0.657461
11.4386	11.9185	0.987176	0.470882
11.5872	16	1	0.632136

## Sheet: 3hpf anaphase
1				2				3				4
X	Y			X	Y			X	Y			X	Y
0	35	0	0.848691	0	43	0	0.906901	0	41	0	0.753532	0	43	0	0.702732
0.17125	41.24	0.0249999	1	0.1713	38.2071	0.0161337	0.805816	0.1713	43.0731	0.0163982	0.791634	0.1713	52.3642	0.0149297	0.855767
0.3425	35.93	0.0499998	0.871242	0.3425	41.6379	0.0322581	0.878174	0.3425	43.9911	0.0327867	0.808505	0.3425	52.9726	0.0298506	0.86571
0.51375	30.2675	0.0749997	0.733935	0.5138	45.0718	0.0483918	0.950597	0.5138	52.8049	0.0491849	0.970493	0.5138	55.0029	0.0447803	0.89889
0.685	32.72	0.0999996	0.793404	0.685	40.8096	0.0645161	0.860704	0.685	47.9293	0.0655735	0.880885	0.685	56.0909	0.0597012	0.916671
0.85625	34	0.124999	0.824442	0.8563	40.5557	0.0806499	0.855349	0.8563	47.5574	0.0819716	0.87405	0.8563	56.7302	0.0746309	0.927119
1.0275	36.68	0.149999	0.889428	1.0275	43.0885	0.0967742	0.908768	1.0275	50.5098	0.0983602	0.928311	1.0275	50.9492	0.0895518	0.832642
1.19875	33.145	0.174999	0.80371	1.1988	44.82	0.112908	0.945286	1.1988	45.6369	0.114758	0.838753	1.1988	46.0007	0.104482	0.751771
1.37001	32.28	0.200001	0.782735	1.37	45.7565	0.129032	0.965038	1.37	45	0.131147	0.827048	1.37	50.8922	0.119402	0.831711
1.54126	35.2675	0.225	0.855177	1.5413	45.871	0.145166	0.967453	1.5413	48.4964	0.147545	0.891308	1.5413	53.9218	0.134332	0.881222
1.71251	37	0.25	0.897187	1.7125	43.1655	0.16129	0.910392	1.7125	53.4104	0.163934	0.981621	1.7125	50.2687	0.149253	0.821521
1.88376	36.4575	0.275	0.884032	1.8838	43.7711	0.177424	0.923164	1.8838	49.6262	0.180332	0.912072	1.8838	50.0261	0.164183	0.817556
2.05501	36.4	0.3	0.882638	2.055	41.0187	0.193548	0.865114	2.055	37.6799	0.19672	0.692513	2.055	51.0094	0.179104	0.833626
2.22626	33.765	0.325	0.818744	2.2263	40.4776	0.209682	0.853702	2.2263	41.0059	0.213119	0.753641	2.2263	51.1448	0.194033	0.835839
2.39751	36.76	0.35	0.891368	2.3975	39.6826	0.225806	0.836935	2.3975	47.7135	0.229507	0.876919	2.3975	43.1816	0.208954	0.705699
2.56876	37.75	0.375	0.915373	2.5688	40.6608	0.24194	0.857566	2.5688	47.9199	0.245905	0.880712	2.5688	37.2479	0.223884	0.608727
2.74001	40.08	0.4	0.971872	2.74	40.7617	0.258065	0.859694	2.74	42.7845	0.262294	0.786329	2.74	40.767	0.238805	0.666238
2.91126	37.8375	0.425	0.917495	2.9113	41.3923	0.274198	0.872994	2.9113	41.893	0.278692	0.769945	2.9113	46.448	0.253735	0.759081
3.08251	36.63	0.449999	0.888215	3.0825	42.2466	0.290323	0.891012	3.0825	44.7573	0.295081	0.822587	3.0825	54.3181	0.268656	0.887699
3.25376	39.9925	0.474999	0.96975	3.2538	40.4069	0.306456	0.852211	3.2538	47.5431	0.311479	0.873787	3.2538	50.5084	0.283585	0.825438
3.42501	38	0.499999	0.921435	3.425	45.8814	0.322581	0.967672	3.425	48.5246	0.327867	0.891826	3.425	48.411	0.298506	0.791161
3.59626	36.5175	0.524999	0.885487	3.5963	44.9781	0.338714	0.948621	3.5963	52.8842	0.344265	0.97195	3.5963	50.5821	0.313436	0.826643
3.76751	37.09	0.549999	0.89937	3.7675	44.0021	0.354839	0.928036	3.7675	44.3187	0.360654	0.814526	3.7675	57.2987	0.328357	0.936409
3.93876	35.8125	0.574999	0.868392	3.9388	41.1883	0.370972	0.868691	3.9388	41.5093	0.377052	0.762893	3.9388	50.1501	0.343286	0.819583
4.11001	34.16	0.599999	0.828322	4.11	41.7784	0.387097	0.881137	4.11	46.6772	0.393441	0.857873	4.11	50.4019	0.358207	0.823698
4.28127	38.375	0.625	0.930529	4.2813	40.7295	0.403231	0.859015	4.2813	43.2502	0.409839	0.794888	4.2813	48.1974	0.373137	0.78767
4.45252	34.34	0.65	0.832687	4.4525	39.8678	0.419355	0.840841	4.4525	45.8269	0.426227	0.842245	4.4525	51.1103	0.388058	0.835275
4.62377	32.41	0.675	0.785887	4.6238	34.3652	0.435489	0.724787	4.6238	54.4104	0.442626	1	4.6238	55.3961	0.402988	0.905316
4.79502	33.48	0.7	0.811833	4.795	41.9896	0.451613	0.885591	4.795	53.9852	0.459014	0.992185	4.795	58.2435	0.417909	0.95185
4.96627	40.605	0.725	0.984602	4.9663	38.4849	0.467747	0.811675	4.9663	48.7646	0.475412	0.896237	4.9663	59.1368	0.432838	0.966449
5.13752	36.5	0.75	0.885063	5.1375	39.5234	0.483871	0.833577	5.1375	49.3671	0.491801	0.90731	5.1375	50.9722	0.447759	0.833018
5.30877	34.24	0.775	0.830262	5.3088	42	0.500005	0.885811	5.3088	49.6622	0.508199	0.912734	5.3088	52.061	0.462689	0.850812
5.48002	40.76	0.799999	0.988361	5.48	36.2581	0.516129	0.76471	5.48	47.91	0.524588	0.88053	5.48	46.7015	0.47761	0.763224
5.65127	38.1425	0.824999	0.924891	5.6513	42.5265	0.532263	0.896915	5.6513	46.3792	0.540986	0.852396	5.6513	46.3816	0.49254	0.757996
5.82252	31.07	0.849999	0.753395	5.8225	40.6556	0.548387	0.857456	5.8225	45.3483	0.557374	0.833449	5.8225	49.354	0.50746	0.806572
5.99377	34.5625	0.874999	0.838082	5.9938	42.2758	0.564521	0.891627	5.9938	47.3413	0.573773	0.870078	5.9938	55.4511	0.52239	0.906215
6.16502	37.76	0.899999	0.915616	6.165	37.7014	0.580645	0.79515	6.165	43.2558	0.590161	0.794991	6.165	61.1898	0.537311	1
6.33627	38.35	0.924999	0.929922	6.3363	42.078	0.596779	0.887456	6.3363	45.8162	0.606559	0.842049	6.3363	55.5538	0.552241	0.907893
6.50752	34.91	0.949999	0.846508	6.5075	47.4142	0.612903	1	6.5075	53.2631	0.622948	0.978914	6.5075	52.6601	0.567162	0.860603
6.67877	39.5675	0.974999	0.959445	6.6788	42.9313	0.629037	0.905452	6.6788	41.5109	0.639346	0.762922	6.6788	52.9214	0.582091	0.864873
6.85003	38	1	0.921435	6.85	45.5016	0.645161	0.959662	6.85	42.8777	0.655735	0.788042	6.85	58.8225	0.597012	0.961312
				7.0213	43.7784	0.661295	0.923318	7.0213	38.8659	0.672133	0.71431	7.0213	59.3018	0.611942	0.969145
				7.1925	35.7305	0.677419	0.753582	7.1925	41.745	0.688521	0.767225	7.1925	60.2477	0.626863	0.984604
				7.3638	33.8991	0.693553	0.714957	7.3638	36.6157	0.704919	0.672954	7.3638	58.4573	0.641793	0.955344
				7.535	38.8356	0.709677	0.819071	7.535	35.7568	0.721308	0.657168	7.535	56.4306	0.656714	0.922222
				7.7063	44.9625	0.725811	0.948292	7.7063	39.2456	0.737706	0.721289	7.7063	55.3502	0.671643	0.904566
				7.8775	44.9958	0.741935	0.948994	7.8775	38.3222	0.754095	0.704318	7.8775	50.1713	0.686564	0.819929
				8.0488	39.9063	0.758069	0.841653	8.0488	38.3959	0.770493	0.705672	8.0488	45.6915	0.701494	0.746718
				8.22	41.6628	0.774194	0.878699	8.22	40.0215	0.786881	0.735549	8.22	55.7572	0.716415	0.911217
				8.3913	43.1748	0.790327	0.910588	8.3913	41.5044	0.80328	0.762803	8.3913	60.8634	0.731344	0.994666
				8.5625	46.1987	0.806452	0.974364	8.5625	39.3631	0.819668	0.723448	8.5625	54.0107	0.746265	0.882675
				8.7338	44.9605	0.822585	0.94825	8.7338	31.1701	0.836066	0.57287	8.7338	58.2446	0.761195	0.951868
				8.905	44.5734	0.83871	0.940085	8.905	34.2564	0.852455	0.629593	8.905	54.6899	0.776116	0.893775
				9.0763	42.5973	0.854843	0.898408	9.0763	39.4625	0.868853	0.725275	9.0763	55.8109	0.791046	0.912095
				9.2475	41.3049	0.870968	0.87115	9.2475	38.9995	0.885242	0.716766	9.2475	53.9171	0.805967	0.881145
				9.4188	41.8335	0.887101	0.882299	9.4188	44.1938	0.90164	0.812231	9.4188	58.7409	0.820896	0.959979
				9.59	37.1696	0.903226	0.783934	9.59	39.3564	0.918028	0.723325	9.59	58.0134	0.835817	0.948089
				9.7613	44.8127	0.91936	0.945132	9.7613	41.1919	0.934427	0.757059	9.7613	50.3578	0.850747	0.822977
				9.9325	37.8408	0.935484	0.79809	9.9325	48.753	0.950815	0.896024	9.9325	54.2029	0.865668	0.885816
				10.1038	39.1748	0.951618	0.826225	10.1038	46.5047	0.967213	0.854702	10.1038	57.8908	0.880598	0.946086
				10.275	39.2914	0.967742	0.828684	10.275	48.7294	0.983602	0.89559	10.275	52.5355	0.895518	0.858566
				10.4463	43.0562	0.983876	0.908087	10.4463	44	1	0.808669	10.4463	51.877	0.910448	0.847805
				10.6175	37	1	0.780357					10.6175	49.7741	0.925369	0.813438
												10.7888	47.7501	0.940299	0.78036
												10.96	51.4297	0.95522	0.840495
												11.1313	49.2462	0.970149	0.804811
												11.3025	47.7434	0.98507	0.780251
												11.4738	44	1	0.719074

## Sheet: 3hpf telophase
1				2				3				4				5				6
X	Y			X	Y			X	Y			X	Y			X	Y			X	Y
0	50	0	0.760879	0	60	0	0.872059	0	36	0	0.748618	0	43	0	0.841843	0	44	0	0.665832	0	43	0	0.730288
0.1713	55.3884	0.0151559	0.842877	0.17125	68.8027	0.0238094	1	0.17125	38.0757	0.0175438	0.791782	0.1713	45.9451	0.0133372	0.899502	0.1713	45.478	0.0120517	0.688198	0.17125	46.3487	0.0175438	0.78716
0.3425	51.0551	0.030303	0.776935	0.3425	53.3537	0.0476188	0.775459	0.3425	48.0886	0.0350876	1	0.3425	49.0498	0.0266666	0.960285	0.3425	57.3572	0.0240963	0.867961	0.3425	47.9474	0.0350876	0.814312
0.5138	44.0909	0.045459	0.670957	0.51375	56.4694	0.0714283	0.820744	0.51375	41.8781	0.0526314	0.870853	0.5138	43.016	0.0400037	0.842156	0.5138	57.5985	0.036148	0.871612	0.51375	51.5983	0.0526314	0.876316
0.685	50.0634	0.0606061	0.761843	0.685	62.0748	0.0952377	0.902215	0.685	40.6685	0.0701752	0.845699	0.685	40.4389	0.0533331	0.791703	0.685	58.119	0.0481926	0.879489	0.685	53.6685	0.0701752	0.911476
0.8563	48.6749	0.075762	0.740714	0.85625	58.9048	0.119047	0.856141	0.85625	35.2447	0.0877189	0.732912	0.8563	42.6178	0.0666703	0.834361	0.8563	44.1414	0.0602443	0.667972	0.85625	51.3189	0.0877189	0.871571
1.0275	48.4215	0.0909091	0.736858	1.0275	61.1224	0.142857	0.888372	1.0275	35.2936	0.105263	0.733929	1.0275	43.0576	0.0799997	0.842971	1.0275	45.8563	0.0722889	0.693923	1.0275	52.0693	0.105263	0.884316
1.1988	52.0523	0.106065	0.79211	1.19875	59.6667	0.166666	0.867215	1.19875	36.3241	0.122807	0.755358	1.1988	41.0416	0.0933369	0.803502	1.1988	44.2633	0.0843406	0.669817	1.19875	50.3161	0.122807	0.85454
1.37	54.2094	0.121212	0.824936	1.37001	57.6531	0.190477	0.837948	1.37001	34.0563	0.140351	0.708199	1.37	47.2843	0.106666	0.92572	1.37	45.4329	0.0963852	0.687516	1.37001	54.2604	0.140351	0.921528
1.5413	49.0909	0.136368	0.747044	1.54126	62.2245	0.214286	0.90439	1.54126	38.7396	0.157895	0.805588	1.5413	40.3744	0.120003	0.79044	1.5413	46.5262	0.108437	0.70406	1.54126	39.5845	0.157895	0.672281
1.7125	49.9697	0.151515	0.760418	1.71251	64.6939	0.238096	0.940281	1.71251	37.4885	0.175439	0.779571	1.7125	44.4533	0.133333	0.870295	1.7125	49.4586	0.120482	0.748435	1.71251	38.0979	0.175439	0.647033
1.8838	53	0.166671	0.806531	1.88376	68.2517	0.261905	0.991992	1.88376	34.7442	0.192983	0.722504	1.8838	39.8965	0.14667	0.781084	1.8838	53.2086	0.132533	0.805182	1.88376	40.5263	0.192983	0.688276
2.055	44.9669	0.181818	0.684287	2.05501	65.7755	0.285714	0.956002	2.05501	42.3435	0.210526	0.880531	2.055	41.9136	0.159999	0.820574	2.055	66.0827	0.144578	1	2.05501	43.8227	0.210526	0.74426
2.2263	53.3168	0.196974	0.811352	2.22626	62.1973	0.309524	0.903995	2.22626	38.7313	0.22807	0.805415	2.2263	41.418	0.173337	0.810871	2.2263	59.5059	0.156629	0.900476	2.22626	48.8969	0.22807	0.830437
2.3975	51.8292	0.212121	0.788715	2.39751	59	0.333333	0.857524	2.39751	44.5596	0.245614	0.926615	2.3975	41.9307	0.186666	0.820909	2.3975	56.8482	0.168674	0.860258	2.39751	49.3986	0.245614	0.838958
2.5688	44.3967	0.227277	0.67561	2.56876	56.102	0.357143	0.815404	2.56876	40.0249	0.263158	0.832316	2.5688	46.64	0.200003	0.913106	2.5688	58.39	0.180726	0.88359	2.56876	45.0499	0.263158	0.765102
2.74	40.022	0.242424	0.609038	2.74001	61.4762	0.380952	0.893514	2.74001	35.8827	0.280702	0.746179	2.74	48.9467	0.213333	0.958266	2.74	50.6386	0.19277	0.766291	2.74001	43.871	0.280702	0.74508
2.9113	41.9146	0.25758	0.637838	2.91126	54.4014	0.404762	0.790687	2.91126	37.2364	0.298245	0.774329	2.9113	40.2724	0.22667	0.788443	2.9113	52.0573	0.204822	0.78776	2.91126	47.6267	0.298245	0.808865
3.0825	41.0661	0.272727	0.624926	3.08251	59.6122	0.428571	0.866422	3.08251	35.7258	0.315789	0.742916	3.0825	45.3056	0.239999	0.886982	3.0825	53.6307	0.216867	0.811569	3.08251	52.2161	0.315789	0.886809		Middle point = cell-cell contacts
3.2538	34.2672	0.287883	0.521464	3.25376	59.4354	0.45238	0.863853	3.25376	33.6667	0.333333	0.700097	3.2538	45.5854	0.253336	0.892459	3.2538	51.1833	0.228918	0.774534	3.25376	51.6667	0.333333	0.877478
3.425	30.9835	0.30303	0.471494	3.42501	61.3197	0.47619	0.89124	3.42501	40.6048	0.350877	0.844375	3.425	44.6933	0.266666	0.874994	3.425	44.5557	0.240963	0.674242	3.42501	50.3629	0.350877	0.855335
3.5963	37.9835	0.318186	0.578017	3.59626	56	0.499999	0.813922	3.59626	41.7867	0.368421	0.868952	3.5963	42.2144	0.280003	0.826463	3.5963	46.7563	0.253015	0.707542	3.59626	49.9806	0.368421	0.848842
3.7675	39.6667	0.333333	0.603631	3.76751	53.8503	0.523809	0.782677	3.76751	38.844	0.385964	0.807759	3.7675	46.5888	0.293332	0.912104	3.7675	47.575	0.265059	0.719931	3.76751	49.9458	0.385964	0.848251
3.9388	42.3333	0.348489	0.64421	3.93876	55.3673	0.547618	0.804726	3.93876	40.6427	0.403508	0.845163	3.9388	41.7739	0.306669	0.817839	3.9388	47.2713	0.277111	0.715335	3.93876	50.7541	0.403508	0.861979
4.11	43.9008	0.363636	0.668064	4.11001	62.7551	0.571428	0.912102	4.11001	31.6731	0.421052	0.658641	4.11	42.2048	0.319999	0.826275	4.11	48.3178	0.289156	0.731172	4.11001	54.5734	0.421052	0.926844
4.2813	41.438	0.378792	0.630586	4.28127	58.1633	0.595238	0.845364	4.28127	36.9215	0.438597	0.767781	4.2813	40.6667	0.333336	0.796162	4.2813	51.7598	0.301207	0.783258	4.28127	49.6291	0.438597	0.842873
4.4525	43.989	0.393939	0.669406	4.45252	54.068	0.619048	0.785841	4.45252	35.0609	0.456141	0.72909	4.4525	42.7909	0.346665	0.837749	4.4525	55.1569	0.313252	0.834665	4.45252	44.494	0.456141	0.755661
4.6238	43.405	0.409095	0.660519	4.62377	60.2041	0.642857	0.875025	4.62377	33.867	0.473684	0.704263	4.6238	38.0384	0.360002	0.744706	4.6238	52.4935	0.325304	0.794361	4.62377	40.7756	0.473684	0.69251
4.795	40.3333	0.424242	0.613775	4.79502	56	0.666667	0.813922	4.79502	33.9825	0.491228	0.706664	4.795	36.2969	0.373332	0.710612	4.795	54.9788	0.337348	0.83197	4.79502	42.6587	0.491228	0.724491
4.9663	43.6887	0.439398	0.664836	4.96627	58.9388	0.690476	0.856635	4.96627	34.7175	0.508772	0.721949	4.9663	40.1703	0.386669	0.786444	4.9663	52.4943	0.3494	0.794373	4.96627	46.8095	0.508772	0.794986
5.1375	50	0.454545	0.760879	5.13752	56.2041	0.714286	0.816888	5.13752	36.9806	0.526316	0.76901	5.1375	40	0.399998	0.78311	5.1375	52.3207	0.361445	0.791746	5.13752	49.2078	0.526316	0.835718
5.3088	52.259	0.469701	0.795255	5.30877	57.8776	0.738095	0.841211	5.30877	38.0785	0.543859	0.79184	5.3088	37.2779	0.413336	0.729817	5.3088	51.7621	0.373496	0.783293	5.30877	57.5552	0.543859	0.977485
5.48	55.2011	0.484848	0.840027	5.48002	59.5238	0.761904	0.865138	5.48002	41.0923	0.561403	0.854512	5.48	37.8388	0.426665	0.740798	5.48	52.7476	0.385541	0.798206	5.48002	49.2672	0.561403	0.836726
5.6513	62	0.500004	0.94349	5.65127	60.6122	0.785714	0.880957	5.65127	47.482	0.578947	0.987386	5.6513	40.2032	0.440002	0.787088	5.6513	49.2643	0.397592	0.745495	5.65127	44.4017	0.578947	0.754093
5.8225	65.7135	0.515152	1	5.82252	57.8503	0.809523	0.840814	5.82252	37.6547	0.596491	0.783028	5.8225	46.4544	0.453332	0.909472	5.8225	47.314	0.409637	0.715982	5.82252	46.6122	0.596491	0.791635
5.9938	59.2011	0.530307	0.900897	5.99377	54.6667	0.833333	0.794543	5.99377	44.0886	0.614035	0.91682	5.9938	44.6578	0.466669	0.874299	5.9938	48.6552	0.421689	0.736277	5.99377	49.2555	0.614035	0.836528
6.165	57.3554	0.545455	0.87281	6.16502	60.6531	0.857142	0.881551	6.16502	40.0055	0.631578	0.831912	6.165	39.8368	0.479998	0.779915	6.165	49.2675	0.433733	0.745543	6.16502	44.349	0.631578	0.753198
6.3363	48.1708	0.56061	0.733043	6.33627	66.7279	0.880951	0.969844	6.33627	40.3897	0.649122	0.839902	6.3363	41.3138	0.493335	0.808831	6.3363	49.019	0.445785	0.741783	6.33627	46.5571	0.649122	0.7907
6.5075	46.0275	0.575758	0.700427	6.50752	60.6463	0.904761	0.881452	6.50752	38	0.666666	0.790208	6.5075	43.6983	0.506665	0.855514	6.5075	52.5414	0.45783	0.795086	6.50752	49.3333	0.666666	0.837849
6.6788	47.6198	0.590914	0.724658	6.67877	58.2857	0.92857	0.847143	6.67877	38.4709	0.68421	0.8	6.6788	42.8624	0.520002	0.839149	6.6788	53.894	0.469881	0.815554	6.67877	44.6731	0.68421	0.758703
6.85	46.3251	0.606061	0.704956	6.85003	63.0476	0.952381	0.916354	6.85003	39.6824	0.701755	0.825193	6.85	41.7956	0.533331	0.818264	6.85	46.7875	0.481926	0.708014	6.85003	46.8122	0.701755	0.795032
7.0213	48.0909	0.621217	0.731827	7.02128	56.1293	0.976191	0.815801	7.02128	41.8624	0.719298	0.870526	7.0213	41.2391	0.546668	0.807369	7.0213	49.727	0.493978	0.752496	7.02128	42.4146	0.719298	0.720346
7.1925	53.6281	0.636364	0.81609	7.19253	63	1	0.915662	7.19253	41.2825	0.736842	0.858467	7.1925	41.3552	0.559998	0.809642	7.1925	52.0331	0.506022	0.787394	7.19253	38.1745	0.736842	0.648334
7.3638	42.1515	0.65152	0.641444					7.36378	41.0785	0.754386	0.854225	7.3638	42.2348	0.573335	0.826862	7.3638	51.7532	0.518074	0.783158	7.36378	40.5189	0.754386	0.68815
7.535	48.3333	0.666667	0.735516					7.53503	42.1681	0.77193	0.876884	7.535	41.3124	0.586664	0.808804	7.535	51.8969	0.530119	0.785333	7.53503	42.8427	0.77193	0.727616
7.7063	39.7603	0.681823	0.605055					7.70628	45.108	0.789474	0.938019	7.7063	41.04	0.600002	0.803471	7.7063	50.0859	0.54217	0.757928	7.70628	47.964	0.789474	0.814594
7.8775	43.6143	0.69697	0.663704					7.87753	42.8781	0.807017	0.891648	7.8775	40.3991	0.613331	0.790923	7.8775	45.776	0.554215	0.692708	7.87753	47.5614	0.807017	0.807756
8.0488	50.8485	0.712126	0.773791					8.04878	46.5254	0.824561	0.967493	8.0488	44.7845	0.626668	0.87678	8.0488	44.2844	0.566267	0.670136	8.04878	46.2281	0.824561	0.785112
8.22	47.0496	0.727273	0.715981					8.22003	41.072	0.842105	0.85409	8.22	51.0784	0.639998	1	8.22	48.7259	0.578311	0.737347	8.22003	44.4681	0.842105	0.755221
8.3913	44.6253	0.742429	0.679089					8.39128	44.891	0.859649	0.933506	8.3913	46.6124	0.653335	0.912566	8.3913	52.2643	0.590363	0.790892	8.39128	49.2592	0.859649	0.83659
8.5625	45.7438	0.757576	0.69611					8.56253	43.9335	0.877192	0.913595	8.5625	49.5556	0.666664	0.970187	8.5625	56.6425	0.602408	0.857146	8.56253	47.7827	0.877192	0.811514
8.7338	50.2231	0.772732	0.764274					8.73378	40.3047	0.894736	0.838134	8.7338	42.1728	0.680001	0.825648	8.7338	58.952	0.614459	0.892094	8.73378	49.1496	0.894736	0.834729
8.905	50.1432	0.787879	0.763058					8.90503	41.7221	0.91228	0.867609	8.905	40.2635	0.693331	0.788269	8.905	55.6367	0.626504	0.841925	8.90503	43.4097	0.91228	0.737246
9.0763	48.2865	0.803035	0.734803					9.07628	42.289	0.929824	0.879398	9.0763	38.9404	0.706668	0.762365	9.0763	54.6107	0.638555	0.826399	9.07628	46.4771	0.929824	0.789341
9.2475	43.5785	0.818182	0.663159					9.24753	43.5152	0.947368	0.904896	9.2475	42.2	0.719997	0.826181	9.2475	51.1841	0.6506	0.774546	9.24753	50.7507	0.947368	0.861921
9.4188	58.3333	0.833338	0.887691					9.41878	42.0877	0.964911	0.875212	9.4188	37.8178	0.733334	0.740387	9.4188	49.7142	0.662652	0.752303	9.41878	58.8809	0.964911	1
9.59	51.9752	0.848485	0.790936					9.59004	40.7008	0.982456	0.846371	9.59	41.7428	0.746664	0.81723	9.59	47.3551	0.674696	0.716604	9.59004	44.6719	0.982456	0.758682
9.7613	51.9504	0.863641	0.790559					9.76129	37	1	0.769413	9.7613	45.48	0.760001	0.890396	9.7613	50.0893	0.686748	0.757979	9.76129	47	1	0.798221
9.9325	51.1019	0.878788	0.777647									9.9325	44.5643	0.77333	0.872469	9.9325	48.1788	0.698793	0.729068
10.1038	49.6446	0.893944	0.75547									10.1038	44.341	0.786667	0.868097	10.1038	45.2443	0.710844	0.684662
10.275	56.6198	0.909091	0.861616									10.275	37.68	0.799997	0.73769	10.275	45.9267	0.722889	0.694988
10.4463	52.7273	0.924247	0.802382									10.4463	36.806	0.813334	0.720579	10.4463	41.5432	0.734941	0.628655
10.6175	44.9752	0.939394	0.684413									10.6175	38.8702	0.826663	0.760991	10.6175	46.1819	0.746985	0.69885
10.7888	49.9091	0.95455	0.759495									10.7888	43.3904	0.840001	0.849486	10.7888	54.2008	0.759037	0.820197
10.96	49.2286	0.969697	0.74914									10.96	38.0446	0.85333	0.744828	10.96	53.3861	0.771082	0.807868
11.1313	53.6474	0.984853	0.816383									11.1313	38.9378	0.866667	0.762314	11.1313	57.1022	0.783133	0.864102
11.3025	56	1	0.852184									11.3025	42.9184	0.879997	0.840246	11.3025	65.7174	0.795178	0.994472
												11.4738	39.7095	0.893334	0.777423	11.4738	54.2992	0.80723	0.821686
												11.645	41.8784	0.906663	0.819885	11.645	56.5266	0.819274	0.855392
												11.8163	39.6832	0.92	0.776908	11.8163	52.153	0.831326	0.789208
												11.9875	44.3156	0.93333	0.8676	11.9875	57.8733	0.843371	0.875771
												12.1588	50.2004	0.946667	0.982811	12.1588	61.0552	0.855422	0.923921
												12.33	48.5856	0.959996	0.951197	12.33	61.0213	0.867467	0.923408
												12.5013	43.6732	0.973333	0.855023	12.5013	52.5911	0.879518	0.795838
												12.6725	45.2126	0.986663	0.885161	12.6725	60.0116	0.891563	0.908129
												12.8438	49	1	0.95931	12.8438	56.2552	0.903615	0.851285
																13.015	51.3313	0.915659	0.776774
																13.1863	55.2291	0.927711	0.835757
																13.3575	47.0094	0.939756	0.711372
																13.5288	58.3905	0.951807	0.883597
																13.7001	52.7786	0.963859	0.798675
																13.8713	46.9714	0.975904	0.710797
																14.0426	45.6708	0.987955	0.691116
																14.2138	46	1	0.696097

## Sheet: 4hpf anaphase
1				2
X	Y			X	Y
0	47	0	0.923931	0	12	0	0.647923
0.15309	42.913	0.0217388	0.843588	0.13947	16.3655	0.0256402	0.883635
0.30619	38.5652	0.0434789	0.758119	0.27895	15.9987	0.0512823	0.863826
0.45928	42.6957	0.0652177	0.839317	0.41842	17.7752	0.0769225	0.959745
0.61237	38.6087	0.0869565	0.758974	0.5579	12.8534	0.102565	0.694001
0.76546	45	0.108695	0.884615	0.69737	15.0677	0.128205	0.813561
0.91856	43.5652	0.130435	0.856409	0.83685	14.2722	0.153847	0.770607
1.07165	33.7826	0.152174	0.664102	0.97632	13.8751	0.179487	0.749166
1.22474	50.8696	0.173913	1	1.11579	11.973	0.205127	0.646468
1.37783	35.8696	0.195652	0.705128	1.25527	12.0414	0.230769	0.65016
1.53093	31.3478	0.217392	0.616238	1.39474	13.1959	0.25641	0.712495
1.68402	34.6087	0.239131	0.680342	1.53422	13.4892	0.282052	0.728328
1.83711	41	0.260869	0.805982	1.67369	12.355	0.307692	0.667093
1.99021	38.5217	0.28261	0.757264	1.81317	10.8889	0.333334	0.58793
2.1433	30.3478	0.304348	0.59658	1.95264	10.1985	0.358974	0.550657
2.29639	40.6957	0.326087	0.8	2.09211	13.8935	0.384614	0.75016
2.44948	36.1739	0.347826	0.71111	2.23159	16.1867	0.410256	0.873979
2.60258	39.5652	0.369566	0.777777	2.37106	13.3176	0.435897	0.719063
2.75567	34.913	0.391305	0.686323	2.51054	13.0947	0.461539	0.707029
2.90876	34.1304	0.413044	0.670939	2.65001	14.1558	0.487179	0.764324
3.06185	40.9565	0.434782	0.805127	2.78948	11.4984	0.512819	0.620838
3.21495	35.5217	0.456522	0.698289	2.92896	11.639	0.538461	0.628434
3.36804	37.913	0.478261	0.745298	3.06843	14.3951	0.564101	0.777245
3.52113	34	0.5	0.668376	3.20791	13.0145	0.589744	0.702698
3.67422	46.6522	0.521739	0.917094	3.34738	11.6036	0.615384	0.626518
3.82732	32.087	0.543479	0.63077	3.48686	12.1611	0.641026	0.656621
3.98041	39	0.565218	0.766666	3.62633	11.7778	0.666666	0.635925
4.1335	40.4348	0.586956	0.794872	3.7658	14.6036	0.692306	0.788498
4.2866	41.7826	0.608697	0.821367	3.90528	12.9001	0.717948	0.696521
4.43969	34.6957	0.630435	0.682052	4.04475	12.282	0.743589	0.663152
4.59278	34.8696	0.652174	0.68547	4.18423	9.49704	0.769231	0.512779
4.74587	35.8261	0.673913	0.704273	4.3237	11.952	0.794871	0.645332
4.89897	40.7826	0.695653	0.801709	4.46318	14.165	0.820513	0.764821
5.05206	38.1304	0.717392	0.749571	4.60265	16.8343	0.846153	0.908946
5.20515	41.913	0.739131	0.82393	4.74212	15.2071	0.871793	0.821086
5.35824	42.5217	0.760869	0.835896	4.8816	14.7074	0.897435	0.794107
5.51134	43.7826	0.78261	0.860683	5.02107	18.5207	0.923076	1
5.66443	33.1304	0.804348	0.651281	5.16055	16.7719	0.948718	0.905573
5.81752	40	0.826087	0.786324	5.30002	12.5503	0.974358	0.677636
5.97062	40.7826	0.847827	0.801709	5.4395	15	1	0.809904
6.12371	34.5217	0.869566	0.678631
6.2768	40.913	0.891305	0.804272
6.42989	39.9565	0.913044	0.785469
6.58299	42.9565	0.934784	0.844443
6.73608	48.7391	0.956522	0.958118
6.88917	49.1304	0.978261	0.965811
7.04226	50	1	0.982905

## Sheet: 4hpf telophase
1				2				3				4
X	Y			X	Y			X	Y			X	Y
0	78	0	0.848099	0	86	0	0.86	0	28	0	0.765299	0	14	0	0.666667
0.1667	77.0546	0.00819616	0.83782	0.1667	88.6087	0.0072459	0.886087	0.1531	27.5393	0.0149261	0.752707	0.13947	15	0.0166662	0.714286
0.3334	79.4647	0.0163923	0.864025	0.3334	95.0962	0.0144918	0.950962	0.3062	23.2756	0.0298522	0.636171	0.27895	12	0.0333335	0.571429
0.5001	79.95	0.0245885	0.869301	0.5001	89.3081	0.0217377	0.893081	0.4593	26.9975	0.0447783	0.737899	0.41842	15	0.0499997	0.714286
0.6668	89.1518	0.0327846	0.969353	0.6668	77.9754	0.0289836	0.779754	0.6124	26.5268	0.0597044	0.725033	0.5579	12	0.0666671	0.571429
0.8336	82.9522	0.0409857	0.901945	0.8336	69.9162	0.0362339	0.699162	0.7655	29.2201	0.0746305	0.798647	0.69737	15	0.0833332	0.714286
1.0003	76.7232	0.0491819	0.834216	1.0003	66.5199	0.0434798	0.665199	0.9186	36.587	0.0895566	1	0.83685	10	0.100001	0.47619
1.167	76.5515	0.057378	0.832349	1.167	71.1458	0.0507257	0.711458	1.0716	33.2874	0.104473	0.909815	0.97632	15	0.116667	0.714286
1.3337	68.0425	0.0655742	0.73983	1.3337	77.0269	0.0579716	0.770269	1.2247	27.9303	0.119399	0.763394	1.11579	13	0.133333	0.619048
1.5004	69.3432	0.0737703	0.753973	1.5004	77.4764	0.0652175	0.774764	1.3778	28.2096	0.134325	0.771028	1.25527	10	0.15	0.47619
1.6671	68.1849	0.0819665	0.741379	1.6671	83.4192	0.0724634	0.834192	1.5309	28.0278	0.149251	0.766059	1.39474	15	0.166666	0.714286
1.8338	64.6832	0.0901626	0.703305	1.8338	86.7219	0.0797093	0.867219	1.684	31.2894	0.164177	0.855205	1.53422	12	0.183334	0.571429
2.0005	69.9712	0.0983588	0.760801	2.0005	84.38	0.0869552	0.8438	1.8371	30.2941	0.179103	0.828002	1.67369	12	0.2	0.571429
2.1672	70.8189	0.106555	0.770018	2.1672	91.0815	0.0942011	0.910815	1.9902	28.7971	0.19403	0.787086	1.81317	11	0.216667	0.52381
2.334	73.089	0.114756	0.794701	2.334	87.7347	0.101451	0.877347	2.1433	25.3284	0.208956	0.692279	1.95264	12	0.233334	0.571429
2.5007	74.2833	0.122952	0.807687	2.5007	89.1739	0.108697	0.891739	2.2964	27.209	0.223882	0.743679	2.09211	12	0.25	0.571429
2.6674	77.5399	0.131148	0.843096	2.6674	89.108	0.115943	0.89108	2.4495	31.4333	0.238808	0.859138	2.23159	12	0.266667	0.571429
2.8341	68.5332	0.139345	0.745166	2.8341	96.3056	0.123189	0.963056	2.6026	27.5157	0.253734	0.752062	2.37106	11	0.283333	0.52381
3.0008	65.9428	0.147541	0.717	3.0008	89.0302	0.130435	0.890302	2.7557	26.9893	0.26866	0.737675	2.51054	12	0.300001	0.571429
3.1675	67.2446	0.155737	0.731155	3.1675	87.2508	0.137681	0.872508	2.9088	28.1611	0.283586	0.769702	2.65001	11	0.316667	0.52381
3.3342	72.4432	0.163933	0.78768	3.3342	84.2119	0.144927	0.842119	3.0619	31.8995	0.298512	0.871881	2.78948	6	0.333333	0.285714
3.5009	69.3956	0.172129	0.754543	3.5009	84.6465	0.152173	0.846465	3.2149	32.4315	0.313429	0.886421	2.92896	10	0.35	0.47619
3.6676	74.1707	0.180325	0.806463	3.6676	92.1193	0.159419	0.921193	3.368	25.6941	0.328355	0.702274	3.06843	15	0.366666	0.714286
3.8344	74.283	0.188526	0.807684	3.8344	91.4444	0.166669	0.914444	3.5211	33.9855	0.343281	0.928896	3.20791	14	0.383334	0.666667
4.0011	69.9766	0.196723	0.76086	4.0011	85.913	0.173915	0.85913	3.6742	29.5525	0.358207	0.807732	3.34738	19	0.4	0.904762
4.1678	67.8073	0.204919	0.737273	4.1678	77.4518	0.181161	0.774518	3.8273	27.4413	0.373133	0.750029	3.48686	12	0.416667	0.571429
4.3345	60.2626	0.213115	0.655239	4.3345	88.5995	0.188407	0.885995	3.9804	27.8233	0.388059	0.76047	3.62633	13	0.433334	0.619048
4.5012	64.4416	0.221311	0.700678	4.5012	88.4329	0.195652	0.884329	4.1335	29.898	0.402985	0.817175	3.7658	18	0.45	0.857143
4.6679	67.1672	0.229507	0.730313	4.6679	86.5547	0.202898	0.865547	4.2866	26.1493	0.417911	0.714716	3.90528	14	0.466667	0.666667
4.8346	75.9694	0.237703	0.82602	4.8346	73.0281	0.210144	0.730281	4.4397	26.012	0.432837	0.710963	4.04475	12	0.483333	0.571429
5.0013	91.8113	0.245899	0.99827	5.0013	75.5879	0.21739	0.755879	4.5928	22.5836	0.447764	0.617257	4.18423	11	0.500001	0.52381
5.168	91.9704	0.254096	1	5.168	72.1504	0.224636	0.721504	4.7459	29.9247	0.46269	0.817905	4.3237	17	0.516667	0.809524
5.3348	79.7382	0.262297	0.866999	5.3348	74.4831	0.231886	0.744831	4.899	29.9768	0.477616	0.819329	4.46318	19	0.533334	0.904762
5.5015	76.7783	0.270493	0.834815	5.5015	76.8204	0.239132	0.768204	5.0521	25.8071	0.492542	0.705363	4.60265	21	0.55	1
5.6682	77.5375	0.278689	0.84307	5.6682	82.3888	0.246378	0.823888	5.2052	23.6035	0.507468	0.645134	4.74212	16	0.566666	0.761905
5.8349	70.2271	0.286885	0.763584	5.8349	76.7595	0.253624	0.767595	5.3582	25.9586	0.522384	0.709503	4.8816	19	0.583334	0.904762
6.0016	78.592	0.295081	0.854536	6.0016	72.9017	0.26087	0.729017	5.5113	30.2395	0.53731	0.826509	5.02107	13	0.6	0.619048
6.1683	70.8119	0.303277	0.769942	6.1683	72.7744	0.268116	0.727744	5.6644	32.6948	0.552236	0.893618	5.16055	17	0.616667	0.809524
6.335	74.1341	0.311474	0.806065	6.335	69.0691	0.275362	0.690691	5.8175	31.2829	0.567163	0.855028	5.30002	16	0.633334	0.761905
6.5017	78.4867	0.31967	0.853391	6.5017	83.138	0.282608	0.83138	5.9706	32.6278	0.582089	0.891787	5.4395	13	0.650001	0.619048
6.6684	85.5015	0.327866	0.929663	6.6684	88.1537	0.289854	0.881537	6.1237	28.8024	0.597015	0.78723	5.57897	9	0.666667	0.428571
6.8352	79.4123	0.336067	0.863455	6.8352	71.3333	0.297104	0.713333	6.2768	30.4569	0.611941	0.832451	5.71844	11	0.683333	0.52381
7.0019	70.9554	0.344263	0.771503	7.0019	76	0.30435	0.76	6.4299	33.2252	0.626867	0.908115	5.85792	17	0.700001	0.809524
7.1686	62.333	0.352459	0.677751	7.1686	77.101	0.311596	0.77101	6.583	32.5511	0.641793	0.88969	5.99739	19	0.716667	0.904762
7.3353	58.1148	0.360655	0.631886	7.3353	71.164	0.318842	0.71164	6.7361	22.7783	0.656719	0.622579	6.13687	15	0.733334	0.714286
7.502	69.7065	0.368852	0.757923	7.502	72.1701	0.326087	0.721701	6.8892	22.5453	0.671645	0.616211	6.27634	13	0.75	0.619048
7.6687	69.0271	0.377048	0.750536	7.6687	67	0.333333	0.67	7.0423	27.9922	0.686571	0.765086	6.41581	13	0.766666	0.619048
7.8354	70.337	0.385244	0.764779	7.8354	62.4566	0.340579	0.624566	7.1954	26.1513	0.701497	0.71477	6.55529	15	0.783334	0.714286
8.0021	67.0876	0.39344	0.729448	8.0021	70.6427	0.347825	0.706427	7.3484	23.5785	0.716414	0.64445	6.69476	16	0.8	0.761905
8.1688	74.1148	0.401636	0.805855	8.1688	75.3714	0.355071	0.753714	7.5015	22.8144	0.73134	0.623566	6.83424	18	0.816667	0.857143
8.3356	65.9484	0.409837	0.717061	8.3356	78.5425	0.362321	0.785425	7.6546	24.395	0.746266	0.666767	6.97371	15	0.833334	0.714286
8.5023	65.9669	0.418034	0.717262	8.5023	82.4045	0.369567	0.824045	7.8077	26.2591	0.761192	0.717717	7.11319	10	0.850001	0.47619
8.669	54.4983	0.42623	0.592563	8.669	72.9788	0.376813	0.729788	7.9608	22.1194	0.776118	0.60457	7.25266	15	0.866667	0.714286
8.8357	62.6633	0.434426	0.681342	8.8357	81.7198	0.384059	0.817198	8.1139	29.0448	0.791044	0.793856	7.39213	14	0.883333	0.666667
9.0024	62.412	0.442622	0.67861	9.0024	85.1985	0.391305	0.851985	8.267	26.9664	0.80597	0.737049	7.53161	12	0.900001	0.571429
9.1691	66.8901	0.450818	0.7273	9.1691	79.7261	0.398551	0.797261	8.4201	27.1194	0.820897	0.74123	7.67108	8	0.916667	0.380952
9.3358	63.9092	0.459014	0.694889	9.3358	75.7038	0.405797	0.757038	8.5732	30.231	0.835823	0.826277	7.81056	19	0.933334	0.904762
9.5025	66.1559	0.46721	0.719317	9.5025	74.8318	0.413043	0.748318	8.7263	36.2969	0.850749	0.992071	7.95003	11	0.95	0.52381
9.6692	68.9393	0.475407	0.749581	9.6692	73.2562	0.420289	0.732562	8.8794	29.4827	0.865675	0.805824	8.08951	15	0.966668	0.714286
9.836	55.4703	0.483608	0.603132	9.836	72.7627	0.427539	0.727627	9.0325	25.1138	0.880601	0.686413	8.22898	10	0.983334	0.47619
10.0027	54.5259	0.491804	0.592864	10.0027	70.724	0.434785	0.70724	9.1856	28.6554	0.895527	0.783213	8.36845	9	1	0.428571
10.1694	57	0.5	0.619765	10.1694	67.6536	0.442031	0.676536	9.3387	24.6518	0.910453	0.673786
10.3361	60.8586	0.508196	0.661719	10.3361	65.8393	0.449276	0.658393	9.4917	26.5139	0.925369	0.724681
10.5028	59.6149	0.516392	0.648197	10.5028	64.5652	0.456522	0.645652	9.6448	29.7008	0.940296	0.811786
10.6695	55.502	0.524588	0.603477	10.6695	64.9072	0.463768	0.649072	9.7979	33.1123	0.955222	0.905029
10.8362	58.5431	0.532785	0.636543	10.8362	61.0765	0.471014	0.610765	9.951	28.2618	0.970148	0.772455
11.0029	60.1247	0.540981	0.65374	11.0029	62.4972	0.47826	0.624972	10.1041	25.2448	0.985074	0.689994
11.1696	52.5149	0.549177	0.570998	11.1696	73.7561	0.485506	0.737561	10.2572	28	1	0.765299
11.3364	58.1411	0.557378	0.632172	11.3364	87.8261	0.492756	0.878261
11.5031	60.5571	0.565574	0.658441	11.5031	100	0.500002	1
11.6698	67.4026	0.57377	0.732873	11.6698	79.3157	0.507248	0.793157
11.8365	64.9721	0.581966	0.706446	11.8365	74.1932	0.514494	0.741932
12.0032	66.5695	0.590163	0.723814	12.0032	73.4159	0.52174	0.734159
12.1699	76.8191	0.598359	0.835259	12.1699	69.528	0.528986	0.69528
12.3366	73.6356	0.606555	0.800645	12.3366	62.7954	0.536232	0.627954
12.5033	64.3529	0.614751	0.699713	12.5033	65.4858	0.543478	0.654858
12.67	67.4109	0.622947	0.732963	12.67	69.012	0.550724	0.69012
12.8368	71.3217	0.631148	0.775485	12.8368	67.2411	0.557974	0.672411
13.0035	63.2634	0.639345	0.687867	13.0035	65.7902	0.56522	0.657902
13.1702	69.6888	0.647541	0.757731	13.1702	66.0227	0.572466	0.660227
13.3369	66.8229	0.655737	0.72657	13.3369	69.046	0.579711	0.69046
13.5036	63.4902	0.663933	0.690333	13.5036	69.1002	0.586957	0.691002
13.6703	71.6165	0.672129	0.778691	13.6703	72.034	0.594203	0.72034
13.837	74.2287	0.680325	0.807093	13.837	71.4098	0.601449	0.714098
14.0037	78.8374	0.688521	0.857204	14.0037	80.4858	0.608695	0.804858
14.1704	77.9049	0.696718	0.847065	14.1704	80.9916	0.615941	0.809916
14.3372	66.287	0.704919	0.720743	14.3372	78.7992	0.623191	0.787992
14.5039	58.2682	0.713115	0.633554	14.5039	86.2439	0.630437	0.862439
14.6706	63.7936	0.721311	0.693632	14.6706	75.5589	0.637683	0.755589
14.8373	61.4421	0.729507	0.668064	14.8373	74.1067	0.644929	0.741067
15.004	69.2037	0.737703	0.752456	15.004	74.8185	0.652175	0.748185
15.1707	69.2515	0.745899	0.752976	15.1707	71.607	0.659421	0.71607
15.3374	57.8388	0.754096	0.628885	15.3374	73.8889	0.666667	0.738889
15.5041	53.8226	0.762292	0.585217	15.5041	81.4442	0.673913	0.814442
15.6708	62.9127	0.770488	0.684054	15.6708	75.6925	0.681158	0.756925
15.8376	58.1419	0.778689	0.632181	15.8376	74.6574	0.688409	0.746574
16.0043	60.9148	0.786885	0.66233	16.0043	70.9981	0.695655	0.709981
16.171	75.538	0.795081	0.821329	16.171	70.0958	0.702901	0.700958
16.3377	68.2217	0.803277	0.741779	16.3377	65.0645	0.710146	0.650645
16.5044	62.52	0.811474	0.679784	16.5044	65.172	0.717392	0.65172
16.6711	70.1363	0.81967	0.762596	16.6711	65.5102	0.724638	0.655102
16.8378	78.5867	0.827866	0.854478	16.8378	63.3293	0.731884	0.633293
17.0045	91.3311	0.836062	0.993049	17.0045	59.7864	0.73913	0.597864
17.1712	81.882	0.844258	0.890308	17.1712	66.8864	0.746376	0.668864
17.338	79.6299	0.852459	0.865821	17.338	63.8994	0.753626	0.638994
17.5047	82.4714	0.860655	0.896717	17.5047	63.3686	0.760872	0.633686
17.6714	76.1733	0.868852	0.828237	17.6714	63.6858	0.768118	0.636858
17.8381	79.7648	0.877048	0.867288	17.8381	70.4386	0.775364	0.704386
18.0048	80.8474	0.885244	0.879059	18.0048	67.4442	0.78261	0.674442
18.1715	83.2257	0.89344	0.904918	18.1715	68.1327	0.789856	0.681327
18.3382	83.0129	0.901636	0.902605	18.3382	78.6931	0.797102	0.786931
18.5049	80.3273	0.909832	0.873404	18.5049	62.3856	0.804348	0.623856
18.6716	77.2032	0.918029	0.839435	18.6716	65.9887	0.811593	0.659887
18.8384	79.8715	0.92623	0.868448	18.8384	65.0678	0.818844	0.650678
19.0051	83.9758	0.934426	0.913074	19.0051	75.2514	0.82609	0.752514
19.1718	89.6764	0.942622	0.975057	19.1718	71.4444	0.833336	0.714444
19.3385	89.8947	0.950818	0.977431	19.3385	71.8622	0.840581	0.718622
19.5052	79.1621	0.959014	0.860735	19.5052	73.1645	0.847827	0.731645
19.6719	89.1314	0.96721	0.969131	19.6719	72.2861	0.855073	0.722861
19.8386	86.1758	0.975407	0.936995	19.8386	70.7099	0.862319	0.707099
20.0053	84.3182	0.983603	0.916797	20.0053	76.3724	0.869565	0.763724
20.172	62.2094	0.991799	0.676407	20.172	80.7038	0.876811	0.807038
20.3388	45	1	0.489288	20.3388	85.6089	0.884061	0.856089
				20.5055	72.2798	0.891307	0.722798
				20.6722	76.7272	0.898553	0.767272
				20.8389	69.7685	0.905799	0.697685
				21.0056	71.5917	0.913045	0.715917
				21.1723	74.7192	0.920291	0.747192
				21.339	86.8015	0.927537	0.868015
				21.5057	86.9868	0.934783	0.869868
				21.6724	92.4272	0.942028	0.924272
				21.8392	87.301	0.949279	0.87301
				22.0059	79.7807	0.956525	0.797807
				22.1726	80.9538	0.96377	0.809538
				22.3393	89.8574	0.971016	0.898574
				22.506	89.7713	0.978262	0.897713
				22.6727	86.0985	0.985508	0.860985
				22.8394	79.122	0.992754	0.79122
				23.0061	50	1	0.5

## Sheet: 5hpf anaphase
1				2				3				4				5
X	Y			X	Y			X	Y			X	Y			X	Y
0	53	0	0.819888	0	60	0	0.666799	0	36	0	0.72	0	42	0	0.823529	0	31	0	0.906419
0.15763	50.6331	0.0256407	0.783273	0.15763	62.142	0.0256407	0.690603	0.18487	38.7654	0.0277779	0.775308	0.16671	32	0.0166666	0.627451	0.15763	23.7924	0.0243899	0.695674
0.31526	41.8757	0.0512813	0.647799	0.31526	58.0177	0.0512813	0.644769	0.36974	43.5556	0.0555558	0.871112	0.33342	47	0.0333331	0.921569	0.31526	20.4646	0.0487798	0.598371
0.4729	40.6686	0.0769236	0.629126	0.4729	56.4556	0.0769236	0.627409	0.55461	49	0.0833337	0.98	0.50013	41	0.0499997	0.803922	0.4729	18.4134	0.0731713	0.538396
0.63053	45.8284	0.102564	0.708946	0.63053	56.2308	0.102564	0.62491	0.73948	45.9012	0.111112	0.918024	0.66684	41	0.0666662	0.803922	0.63053	20.8786	0.0975612	0.610476
0.78816	40.6608	0.128205	0.629005	0.78816	52.7357	0.128205	0.586068	0.92435	41.2099	0.13889	0.824198	0.83356	51	0.0833337	1	0.78816	24.2719	0.121951	0.709694
0.94579	40.6331	0.153846	0.628577	0.94579	56.1775	0.153846	0.624318	1.10921	41.2222	0.166666	0.824444	1.00027	33	0.1	0.647059	0.94579	28.0208	0.146341	0.81931
1.10343	44.0217	0.179488	0.680997	1.10343	64.2919	0.179488	0.714496	1.29408	42.7531	0.194444	0.855062	1.16698	40	0.116667	0.784314	1.10343	29.1321	0.170732	0.851803
1.26106	45.6055	0.205128	0.705498	1.26106	59.215	0.205128	0.658075	1.47895	48.8765	0.222222	0.97753	1.33369	44	0.133333	0.862745	1.26106	33.1267	0.195122	0.968603
1.41869	47.3965	0.230769	0.733204	1.41869	56.7574	0.230769	0.630763	1.66382	47	0.25	0.94	1.5004	41	0.15	0.803922	1.41869	28.0571	0.219512	0.820371
1.57632	47.5523	0.25641	0.735614	1.57632	58.5187	0.25641	0.650336	1.84869	39.9877	0.277778	0.799754	1.66711	38	0.166667	0.745098	1.57632	32.9179	0.243902	0.962498
1.73395	53.213	0.28205	0.823183	1.73395	54.5661	0.28205	0.60641	2.03356	45.2469	0.305555	0.904938	1.83382	40	0.183333	0.784314	1.73395	29.3653	0.268292	0.858622
1.89159	47.432	0.307693	0.733753	1.89159	56.6331	0.307693	0.629381	2.21843	39	0.333333	0.78	2.00053	38	0.2	0.745098	1.89159	26.5503	0.292683	0.776313
2.04922	49.6667	0.333333	0.768323	2.04922	60.3333	0.333333	0.670503	2.4033	42.7778	0.361111	0.855556	2.16724	31	0.216666	0.607843	2.04922	26.2308	0.317073	0.766971
2.20685	48.8067	0.358974	0.755019	2.20685	75.9349	0.358974	0.843888	2.58817	45.0247	0.388889	0.900494	2.33396	40	0.233334	0.784314	2.20685	33.3117	0.341463	0.974012
2.36448	50.6154	0.384615	0.782999	2.36448	69.0888	0.384615	0.767805	2.77304	36.8889	0.416667	0.737778	2.50067	35	0.25	0.686275	2.36448	29.3308	0.365853	0.857613
2.52211	50.6075	0.410255	0.782877	2.52211	74.856	0.410255	0.831898	2.95791	34.2593	0.444445	0.685186	2.66738	37	0.266667	0.72549	2.52211	23.975	0.390243	0.701013
2.67975	60.5108	0.435898	0.936077	2.67975	86.8777	0.435898	0.965499	3.14277	41.0741	0.472221	0.821482	2.83409	50	0.283333	0.980392	2.67975	31.3748	0.414635	0.917378
2.83738	63.213	0.461538	0.977879	2.83738	89.9822	0.461538	1	3.32764	39	0.499999	0.78	3.0008	48	0.3	0.941176	2.83738	31.1648	0.439024	0.911238
2.99501	64.4655	0.487179	0.997254	2.99501	84.8757	0.487179	0.94325	3.51251	42.9506	0.527777	0.859012	3.16751	45	0.316666	0.882353	2.99501	27.6466	0.463414	0.808368
3.15264	64.643	0.51282	1	3.15264	75.6233	0.51282	0.840425	3.69738	46.0741	0.555555	0.921482	3.33422	46	0.333333	0.901961	3.15264	28.8632	0.487804	0.843941
3.31028	53.8876	0.538462	0.833618	3.31028	78.6864	0.538462	0.874466	3.88225	41.7778	0.583333	0.835556	3.50093	39	0.35	0.764706	3.31028	27.3171	0.512196	0.798734
3.46791	53.2406	0.564102	0.82361	3.46791	82.0789	0.564102	0.912168	4.06712	38.5309	0.611111	0.770618	3.66764	40	0.366666	0.784314	3.46791	26.3563	0.536586	0.770641
3.62554	48.1381	0.589743	0.744676	3.62554	82.142	0.589743	0.912869	4.25199	37	0.638889	0.74	3.83436	39	0.383334	0.764706	3.62554	28.2635	0.560976	0.826406
3.78317	45.2426	0.615384	0.699884	3.78317	78.9231	0.615384	0.877097	4.43686	36.5556	0.666667	0.731112	4.00107	39	0.4	0.764706	3.78317	28.533	0.585365	0.834286
3.9408	43.8323	0.641024	0.678067	3.9408	66.1913	0.641024	0.735604	4.62173	34.9136	0.694445	0.698272	4.16778	37	0.416667	0.72549	3.9408	29.58	0.609755	0.8649
4.09844	50.3333	0.666667	0.778635	4.09844	68.6667	0.666667	0.763114	4.8066	38.3704	0.722222	0.767408	4.33449	37	0.433333	0.72549	4.09844	26.4396	0.634147	0.773076
4.25607	47.7988	0.692307	0.739427	4.25607	71.9527	0.692307	0.799633	4.99147	40	0.75	0.8	4.5012	48	0.45	0.941176	4.25607	22.9714	0.658537	0.671669
4.4137	45.3669	0.717948	0.701807	4.4137	67.6548	0.717948	0.751869	5.17633	46.5679	0.777777	0.931358	4.66791	42	0.466666	0.823529	4.4137	21.8203	0.682927	0.638011
4.57133	41.5523	0.743589	0.642797	4.57133	71.2446	0.743589	0.791763	5.3612	40.4321	0.805555	0.808642	4.83462	42	0.483333	0.823529	4.57133	30.3968	0.707317	0.888782
4.72897	52.0592	0.769231	0.805334	4.72897	69.7219	0.769231	0.774841	5.54607	40.4444	0.833333	0.808888	5.00133	38	0.5	0.745098	4.72897	34.2005	0.731708	1
4.8866	51.57	0.794872	0.797766	4.8866	69.2978	0.794872	0.770128	5.73094	38.8765	0.86111	0.77753	5.16805	43	0.516667	0.843137	4.8866	28.8084	0.756098	0.842339
5.04423	46.3925	0.820512	0.717672	5.04423	69.4477	0.820512	0.771794	5.91581	46.2593	0.888888	0.925186	5.33476	45	0.533334	0.882353	5.04423	28.4051	0.780488	0.830546
5.20186	43.2604	0.846153	0.66922	5.20186	65.5621	0.846153	0.728612	6.10068	50	0.916666	1	5.50147	40	0.55	0.784314	5.20186	31.8079	0.804878	0.930042
5.35949	44.6272	0.871793	0.690364	5.35949	58.1026	0.871793	0.645712	6.28555	49.8519	0.944444	0.997038	5.66818	44	0.566667	0.862745	5.35949	24.8543	0.829268	0.726723
5.51713	45.4911	0.897436	0.703728	5.51713	52.9034	0.897436	0.587932	6.47042	40.7654	0.972222	0.815308	5.83489	35	0.583333	0.686275	5.51713	22.6663	0.853659	0.662748
5.67476	45.574	0.923076	0.705011	5.67476	49.0473	0.923076	0.545078	6.65529	46	1	0.92	6.0016	34	0.6	0.666667	5.67476	23.9072	0.878049	0.699031
5.83239	45.1874	0.948717	0.69903	5.83239	50.8442	0.948717	0.565047					6.16831	30	0.616666	0.588235	5.83239	24.1416	0.902439	0.705884
5.99002	49.6706	0.974358	0.768383	5.99002	52.5404	0.974358	0.583898					6.33502	42	0.633333	0.823529	5.99002	16.1071	0.926829	0.470961
6.14766	49	1	0.758009	6.14766	58	1	0.644572					6.50173	37	0.649999	0.72549	6.14766	23.2207	0.95122	0.678958
												6.66845	39	0.666667	0.764706	6.30529	27.7549	0.97561	0.811535
												6.83516	36	0.683334	0.705882	6.46292	30	1	0.87718
												7.00187	29	0.7	0.568627
												7.16858	33	0.716667	0.647059
												7.33529	32	0.733333	0.627451
												7.502	32	0.75	0.627451
												7.66871	31	0.766666	0.607843
												7.83542	35	0.783333	0.686275
												8.00213	30	0.799999	0.588235
												8.16885	32	0.816667	0.627451
												8.33556	30	0.833333	0.588235
												8.50227	37	0.85	0.72549
												8.66898	37	0.866667	0.72549
												8.83569	35	0.883333	0.686275
												9.0024	38	0.9	0.745098
												9.16911	34	0.916666	0.666667
												9.33582	39	0.933333	0.764706
												9.50253	45	0.949999	0.882353
												9.66925	34	0.966667	0.666667
												9.83596	34	0.983333	0.666667
												10.0027	35	1	0.686275

[truncated: 2 more sheets: 5hpf telophase, 6hpf telophase]
