# Supplementary material for: Par protein localization during the early development of Mnemiopsis leidyi suggests different modes of epithelial organization in the metazoa
Source: eLife. 2020 Jul 27;9:e54927. doi: 10.7554/eLife.54927 (PMC7441587; doi:10.7554/eLife.54927)
Supplement: Figure 3—figure supplement 5—source data 1. [file elife-54927-fig3-figsupp5-data1.xlsx]

## Sheet: 4 cell
X	Y			X	Y
0	8	0	0.47762	0	7	0	0.427238
0.1758	3.4709	0.00263173	0.207222	0.1758	8.742	0.00283302	0.53356
0.3516	7.6027	0.00526346	0.453901	0.3516	7.3662	0.00566604	0.449589
0.5274	7.4632	0.00789519	0.445572	0.5274	12.2191	0.00849906	0.745781
0.7032	5.3263	0.0105269	0.317994	0.7032	15.6028	0.0113321	0.952302
0.879	11.383	0.0131586	0.679594	0.879	3.8892	0.0141651	0.237374
1.0547	10.0462	0.0157889	0.599784	1.0547	8.9255	0.0169965	0.544759
1.2305	6.9939	0.0184206	0.417554	1.2305	9.1648	0.0198295	0.559365
1.4063	7.2784	0.0210523	0.434539	1.4063	5.7723	0.0226626	0.352307
1.5821	9.2604	0.0236841	0.55287	1.5821	8.4593	0.0254956	0.516305
1.7579	14.7202	0.0263158	0.878834	1.7579	11.323	0.0283286	0.691088
1.9337	8.5293	0.0289475	0.509221	1.9337	5.9895	0.0311616	0.365563
2.1095	7.9496	0.0315792	0.474611	2.1095	4.9984	0.0339946	0.305073
2.2853	8.4448	0.034211	0.504176	2.2853	3.4698	0.0368277	0.211776
2.4611	3.434	0.0368427	0.205019	2.4611	4.404	0.0396607	0.268794
2.6369	0.8961	0.0394744	0.0534995	2.6369	2.0924	0.0424937	0.127708
2.8126	1.9043	0.0421047	0.113692	2.8126	4.2528	0.0453251	0.259566
2.9884	2.0383	0.0447364	0.121692	2.9884	6.2433	0.0481581	0.381054
3.1642	3.5265	0.0473681	0.210541	3.1642	5.3579	0.0509912	0.327014
3.34	2.58	0.0499999	0.154033	3.34	7.8999	0.0538242	0.482163
3.5158	2.5789	0.0526316	0.153967	3.5158	6.3627	0.0566572	0.388341
3.6916	1.8684	0.0552633	0.111548	3.6916	2.3227	0.0594902	0.141764
3.8674	1.9648	0.057895	0.117304	3.8674	2.916	0.0623232	0.177975
4.0432	0.286	0.0605268	0.0170749	4.0432	3.1271	0.0651563	0.19086
4.219	0.7635	0.0631585	0.0455829	4.219	7.6258	0.0679893	0.465433
4.3948	0.7175	0.0657902	0.0428366	4.3948	2.5293	0.0708223	0.154373
4.5705	0.9789	0.0684205	0.0584428	4.5705	2.9917	0.0736537	0.182596
4.7463	0.6784	0.0710522	0.0405022	4.7463	9.3573	0.0764867	0.571114
4.9221	1.3563	0.0736839	0.0809746	4.9221	8.3574	0.0793198	0.510086
5.0979	1.2513	0.0763156	0.0747058	5.0979	7.6869	0.0821528	0.469163
5.2737	1.0582	0.0789474	0.0631773	5.2737	4.3736	0.0849858	0.266938
5.4495	1	0.0815791	0.0597026	5.4495	4.1757	0.0878188	0.25486
5.6253	0.396	0.0842108	0.0236422	5.6253	2.7734	0.0906518	0.169272
5.8011	0.8428	0.0868426	0.0503173	5.8011	4.5174	0.0934849	0.275715
5.9769	0.1789	0.0894743	0.0106808	5.9769	12.642	0.0963179	0.771592
6.1527	0	0.092106	0	6.1527	6.8825	0.0991509	0.420067
6.3284	0.5375	0.0947362	0.0320901	6.3284	3.5913	0.101982	0.219192
6.5042	0.7366	0.097368	0.0439769	6.5042	8.566	0.104815	0.522818
6.68	0.12	0.0999997	0.00716431	6.68	5.2434	0.107648	0.320026
6.8558	1.2005	0.102631	0.0716729	6.8558	1.7786	0.110481	0.108555
7.0316	0.6316	0.105263	0.0377081	7.0316	3.1753	0.113314	0.193801
7.2074	0.0716	0.107895	0.0042747	7.2074	3.518	0.116147	0.214718
7.3832	0.1886	0.110527	0.0112599	7.3832	2.8959	0.11898	0.176748
7.559	0.1526	0.113158	0.00911061	7.559	4.9899	0.121813	0.304554
7.7348	0.0146	0.11579	0.000871657	7.7348	3.5743	0.124646	0.218154
7.9106	0	0.118422	0	7.9106	0.5202	0.127479	0.0317499
8.0863	0	0.121052	0	8.0863	0.0118	0.130311	0.000720202
8.2621	0	0.123684	0	8.2621	0.8669	0.133144	0.0529104
8.4379	0.7474	0.126315	0.0446217	8.4379	0.1252	0.135977	0.00764146
8.6137	0.7149	0.128947	0.0426814	8.6137	0.1415	0.13881	0.00863632
8.7895	0.5263	0.131579	0.0314215	8.7895	0.0353	0.141643	0.0021545
8.9653	0.5293	0.134211	0.0316006	8.9653	0	0.144476	0
9.1411	0.1786	0.136842	0.0106629	9.1411	0	0.147309	0
9.3169	0.5351	0.139474	0.0319468	9.3169	0.4213	0.150142	0.0257136
9.4927	0.2363	0.142106	0.0141077	9.4927	0.5619	0.152975	0.034295
9.6685	0	0.144738	0	9.6685	0.6742	0.155808	0.0411491
9.8442	0	0.147368	0	9.8442	2.0367	0.15864	0.124308
10.02	0	0.15	0	10.02	1.8247	0.161473	0.111369
10.1958	0.5631	0.152631	0.0336185	10.1958	1.9767	0.164306	0.120646
10.3716	0.2239	0.155263	0.0133674	10.3716	1.1601	0.167139	0.0708056
10.5474	0	0.157895	0	10.5474	1.9778	0.169972	0.120713
10.7232	0	0.160526	0	10.7232	3.936	0.172805	0.24023
10.899	0	0.163158	0	10.899	3.6059	0.175638	0.220083
11.0748	0	0.16579	0	11.0748	4.5297	0.178471	0.276466
11.2506	0	0.168422	0	11.2506	2.5218	0.181304	0.153916
11.4264	0.5367	0.171053	0.0320424	11.4264	1.6117	0.184137	0.0983686
11.6021	0.3145	0.173684	0.0187765	11.6021	2.5994	0.186968	0.158652
11.7779	0.0034	0.176315	0.000202989	11.7779	3.5779	0.189801	0.218374
11.9537	0	0.178947	0	11.9537	1.0848	0.192634	0.0662097
12.1295	0	0.181579	0	12.1295	0.0532	0.195467	0.00324701
12.3053	0	0.184211	0	12.3053	0.8017	0.1983	0.048931
12.4811	0	0.186842	0	12.4811	1.0543	0.201133	0.0643482
12.6569	0	0.189474	0	12.6569	1.1432	0.203966	0.0697741
12.8327	0	0.192106	0	12.8327	1.0422	0.206799	0.0636097
13.0085	0	0.194737	0	13.0085	1	0.209632	0.061034
13.1843	0	0.197369	0	13.1843	0.2125	0.212465	0.0129697
13.36	0	0.199999	0	13.36	2.5853	0.215297	0.157791
13.5358	0	0.202631	0	13.5358	1.5932	0.21813	0.0972394
13.7116	0	0.205263	0	13.7116	0.221	0.220963	0.0134885
13.8874	0	0.207895	0	13.8874	1.5524	0.223796	0.0947492
14.0632	0	0.210526	0	14.0632	0.4533	0.226629	0.0276667
14.239	0	0.213158	0	14.239	0.681	0.229462	0.0415642
14.4148	0	0.21579	0	14.4148	0.249	0.232295	0.0151975
14.5906	0	0.218422	0	14.5906	0.0823	0.235128	0.0050231
14.7664	0.2701	0.221053	0.0161257	14.7664	0.7223	0.237961	0.0440849
14.9422	0.1766	0.223685	0.0105435	14.9422	0.1869	0.240794	0.0114073
15.1179	0	0.226315	0	15.1179	0	0.243625	0
15.2937	0	0.228947	0	15.2937	0	0.246458	0
15.4695	0	0.231579	0	15.4695	0.3913	0.249291	0.0238826
15.6453	0	0.23421	0	15.6453	0.4363	0.252124	0.0266292
15.8211	0	0.236842	0	15.8211	0.3513	0.254957	0.0214413
15.9969	0.1481	0.239474	0.00884195	15.9969	0.0686	0.25779	0.00418694
16.1727	0.2243	0.242106	0.0133913	16.1727	0.6053	0.260623	0.0369439
16.3485	0	0.244737	0	16.3485	0.2381	0.263456	0.0145322
16.5243	0	0.247369	0	16.5243	0	0.266289	0
16.7001	0.25	0.250001	0.0149256	16.7001	0	0.269122	0
16.8759	0.2074	0.252632	0.0123823	16.8759	0.1155	0.271956	0.00704943
17.0516	0	0.255263	0	17.0516	0.0669	0.274787	0.00408318
17.2274	0	0.257894	0	17.2274	0	0.27762	0
17.4032	0	0.260526	0	17.4032	0.4219	0.280453	0.0257503
17.579	0	0.263158	0	17.579	0.142	0.283286	0.00866683
17.7548	0.4512	0.26579	0.0269378	17.7548	0	0.286119	0
17.9306	0.469	0.268421	0.0280005	17.9306	0	0.288952	0
18.1064	0	0.271053	0	18.1064	0.5337	0.291785	0.0325739
18.2822	0.3145	0.273685	0.0187765	18.2822	0.247	0.294618	0.0150754
18.458	0.5111	0.276317	0.030514	18.458	0	0.297451	0
18.6338	0.2701	0.278948	0.0161257	18.6338	0.0059	0.300284	0.000360101
18.8095	0	0.281578	0	18.8095	0.0283	0.303116	0.00172726
18.9853	0	0.28421	0	18.9853	0	0.305949	0
19.1611	0	0.286842	0	19.1611	0	0.308782	0
19.3369	0	0.289474	0	19.3369	0	0.311615	0
19.5127	0	0.292105	0	19.5127	0.2971	0.314448	0.0181332
19.6885	0	0.294737	0	19.6885	0.1645	0.317281	0.0100401
19.8643	0	0.297369	0	19.8643	0.4102	0.320114	0.0250362
20.0401	0	0.300001	0	20.0401	0.4333	0.322947	0.026446
20.2159	0	0.302632	0	20.2159	0.0738	0.32578	0.00450431
20.3917	0.1476	0.305264	0.0088121	20.3917	0.1902	0.328613	0.0116087
20.5674	0.2884	0.307894	0.0172182	20.5674	0.0376	0.331444	0.00229488
20.7432	0	0.310526	0	20.7432	0	0.334277	0
20.919	0	0.313158	0	20.919	0	0.33711	0
21.0948	0	0.315789	0	21.0948	0	0.339943	0
21.2706	0	0.318421	0	21.2706	0	0.342776	0
21.4464	0	0.321053	0	21.4464	0	0.345609	0
21.6222	0.0019	0.323685	0.000113435	21.6222	0	0.348442	0
21.798	0.0947	0.326316	0.00565383	21.798	0	0.351275	0
21.9738	0.1212	0.328948	0.00723595	21.9738	0	0.354108	0
22.1496	0.1844	0.33158	0.0110092	22.1496	0	0.356941	0
22.3253	0.4855	0.33421	0.0289856	22.3253	0	0.359773	0
22.5011	0	0.336842	0	22.5011	0	0.362606	0
22.6769	0	0.339474	0	22.6769	0	0.365439	0
22.8527	0	0.342105	0	22.8527	0.0304	0.368272	0.00185543
23.0285	0	0.344737	0	23.0285	0.0494	0.371105	0.00301508
23.2043	0.0578	0.347369	0.00345081	23.2043	0	0.373938	0
23.3801	0.07	0.35	0.00417918	23.3801	0	0.376771	0
23.5559	0	0.352632	0	23.5559	0.6204	0.379604	0.0378655
23.7317	0	0.355264	0	23.7317	0.7078	0.382437	0.0431999
23.9075	0.4727	0.357896	0.0282214	23.9075	0.1703	0.38527	0.0103941
24.0832	1.358	0.360526	0.0810761	24.0832	0	0.388101	0
24.259	1.0092	0.363158	0.0602518	24.259	0	0.390934	0
24.4348	0	0.365789	0	24.4348	0	0.393767	0
24.6106	0	0.368421	0	24.6106	0	0.3966	0
24.7864	0.0991	0.371053	0.00591652	24.7864	0	0.399433	0
24.9622	0.3692	0.373685	0.0220422	24.9622	0	0.402266	0
25.138	0.309	0.376316	0.0184481	25.138	0	0.405099	0
25.3138	0	0.378948	0	25.3138	0	0.407932	0
25.4896	0.0062	0.38158	0.000370156	25.4896	0	0.410765	0
25.6654	0	0.384211	0	25.6654	0	0.413599	0
25.8411	0.3835	0.386842	0.0228959	25.8411	0	0.41643	0
26.0169	1.1807	0.389473	0.0704908	26.0169	0	0.419263	0
26.1927	0.0716	0.392105	0.0042747	26.1927	0.3831	0.422096	0.0233821
26.3685	0.3324	0.394737	0.0198451	26.3685	0.4628	0.424929	0.0282466
26.5443	0	0.397369	0	26.5443	0.0715	0.427762	0.00436393
26.7201	0	0.4	0	26.7201	0	0.430595	0
26.8959	0	0.402632	0	26.8959	0.0012	0.433428	7.32408e-05
27.0717	0	0.405264	0	27.0717	0	0.436261	0
27.2475	0	0.407895	0	27.2475	0.464	0.439094	0.0283198
27.4233	0	0.410527	0	27.4233	0.328	0.441927	0.0200192
27.599	0	0.413157	0	27.599	0	0.444759	0
27.7748	0	0.415789	0	27.7748	0.4726	0.447592	0.0288447
27.9506	0	0.418421	0	27.9506	0.4619	0.450425	0.0281916
28.1264	0	0.421053	0	28.1264	0	0.453258	0
28.3022	0.0619	0.423684	0.00369559	28.3022	0	0.456091	0
28.478	0.6421	0.426316	0.038335	28.478	0	0.458924	0
28.6538	1.3591	0.428948	0.0811418	28.6538	0.459	0.461757	0.0280146
28.8296	0	0.43158	0	28.8296	0.5357	0.46459	0.0326959
29.0054	0.1004	0.434211	0.00599414	29.0054	0	0.467423	0
29.1812	0.7449	0.436843	0.0444724	29.1812	0	0.470256	0
29.3569	0	0.439473	0	29.3569	0	0.473087	0
29.5327	0.0037	0.442105	0.000220899	29.5327	0	0.47592	0
29.7085	0.1077	0.444737	0.00642997	29.7085	0	0.478753	0
29.8843	0.0831	0.447368	0.00496128	29.8843	0.232	0.481586	0.0141599
30.0601	0.7	0.45	0.0417918	30.0601	0.258	0.484419	0.0157468
30.2359	0.5527	0.452632	0.0329976	30.2359	0	0.487252	0
30.4117	0	0.455264	0	30.4117	0.1517	0.490085	0.00925886
30.5875	0	0.457895	0	30.5875	0.9034	0.492918	0.0551382
30.7633	0	0.460527	0	30.7633	0.8651	0.495751	0.0528005
30.9391	0	0.463159	0	30.9391	0	0.498584	0
31.1148	0	0.465789	0	31.1148	0	0.501416	0
31.2906	0.0047	0.468421	0.000280602	31.2906	0	0.504249	0
31.4664	0.057	0.471052	0.00340305	31.4664	0.4929	0.507082	0.0300837
31.6422	0.8532	0.473684	0.0509382	31.6422	0.5099	0.509915	0.0311213
31.818	0.1855	0.476316	0.0110748	31.818	0	0.512748	0
31.9938	0	0.478948	0	31.9938	0.2264	0.515581	0.0138181
32.1696	0	0.481579	0	32.1696	0.2864	0.518414	0.0174801
32.3454	0	0.484211	0	32.3454	0.3472	0.521247	0.021191
32.5212	0.0145	0.486843	0.000865687	32.5212	0.291	0.52408	0.0177609
32.697	0.6286	0.489475	0.037529	32.697	0	0.526913	0
32.8727	0	0.492105	0	32.8727	0	0.529744	0
33.0485	0	0.494737	0	33.0485	0.9137	0.532577	0.0557668
33.2243	0	0.497368	0	33.2243	1.0041	0.53541	0.0612843
33.4001	0	0.5	0	33.4001	0	0.538243	0
33.5759	0	0.502632	0	33.5759	0	0.541076	0
33.7517	0	0.505263	0	33.7517	0.8683	0.543909	0.0529959
33.9275	0	0.507895	0	33.9275	1.6843	0.546742	0.1028
34.1033	0.9789	0.510527	0.0584428	34.1033	0.9745	0.549575	0.0594777
34.2791	0.0263	0.513159	0.00157018	34.2791	0.6322	0.552408	0.0385857
34.4549	0	0.51579	0	34.4549	0.7371	0.555241	0.0449882
34.6306	0.6032	0.518421	0.0360126	34.6306	0.9723	0.558073	0.0593434
34.8064	0.0301	0.521052	0.00179705	34.8064	0	0.560906	0
34.9822	0	0.523684	0	34.9822	0	0.563739	0
35.158	0	0.526316	0	35.158	0	0.566572	0
35.3338	0	0.528948	0	35.3338	0	0.569405	0
35.5096	0	0.531579	0	35.5096	0.3563	0.572238	0.0217464
35.6854	0	0.534211	0	35.6854	1.0657	0.575071	0.065044
35.8612	0	0.536843	0	35.8612	1.1931	0.577904	0.0728197
36.037	0	0.539474	0	36.037	0.9123	0.580737	0.0556814
36.2128	0	0.542106	0	36.2128	0.5012	0.58357	0.0305903
36.3886	0.9489	0.544738	0.0566518	36.3886	0.4079	0.586403	0.0248958
36.5643	0.1157	0.547368	0.00690759	36.5643	0.1903	0.589235	0.0116148
36.7401	0	0.55	0	36.7401	0.0971	0.592068	0.00592641
36.9159	0	0.552632	0	36.9159	0.4961	0.594901	0.030279
37.0917	0.323	0.555263	0.0192839	37.0917	0.6251	0.597734	0.0381524
37.2675	0.011	0.557895	0.000656728	37.2675	0.017	0.600567	0.00103758
37.4433	0	0.560527	0	37.4433	0.4177	0.6034	0.0254939
37.6191	0	0.563158	0	37.6191	0.4929	0.606233	0.0300837
37.7949	0.6627	0.56579	0.0395649	37.7949	0	0.609066	0
37.9707	0.0922	0.568422	0.00550458	37.9707	0	0.611899	0
38.1465	0	0.571054	0	38.1465	0.3405	0.614732	0.0207821
38.3222	0	0.573684	0	38.3222	0.6508	0.617563	0.039721
38.498	0.8474	0.576316	0.050592	38.498	0.4646	0.620396	0.0283564
38.6738	0.1579	0.578947	0.00942703	38.6738	0.9828	0.623229	0.0599843
38.8496	0.1894	0.581579	0.0113077	38.8496	0.5105	0.626062	0.0311579
39.0254	0.023	0.584211	0.00137316	39.0254	0.9506	0.628895	0.058019
39.2012	0	0.586843	0	39.2012	0.9518	0.631728	0.0580922
39.377	1.573	0.589474	0.0939121	39.377	2.4178	0.634561	0.147568
39.5528	1.2431	0.592106	0.0742163	39.5528	3.7541	0.637394	0.229128
39.7286	0.2314	0.594738	0.0138152	39.7286	4.4516	0.640227	0.271699
39.9044	0.8053	0.597369	0.0480785	39.9044	5.4558	0.64306	0.33299
40.0801	0.52	0.6	0.0310453	40.0801	1.4252	0.645892	0.0869857
40.2559	0.5062	0.602631	0.0302214	40.2559	1.7315	0.648725	0.10568
40.4317	0.5457	0.605263	0.0325797	40.4317	3.0517	0.651558	0.186258
40.6075	0.6684	0.607895	0.0399052	40.6075	1.9322	0.654391	0.11793
40.7833	0.3561	0.610527	0.0212601	40.7833	3.6399	0.657224	0.222158
40.9591	3.4306	0.613158	0.204816	40.9591	4.1167	0.660057	0.251259
41.1349	6.907	0.61579	0.412366	41.1349	1.5168	0.66289	0.0925764
41.3107	7.1655	0.618422	0.427799	41.3107	0.1227	0.665723	0.00748888
41.4865	15.5121	0.621054	0.926112	41.4865	0.7199	0.668556	0.0439384
41.6623	13.2526	0.623685	0.791214	41.6623	1.5297	0.671389	0.0933638
41.838	12.2464	0.626315	0.731141	41.838	1.2773	0.67422	0.0779588
42.0138	10.8858	0.628947	0.64991	42.0138	1.9435	0.677053	0.11862
42.1896	12.5346	0.631579	0.748348	42.1896	1.4102	0.679886	0.0860702
42.3654	10.2164	0.634211	0.609945	42.3654	1	0.682719	0.061034
42.5412	7.4201	0.636842	0.442999	42.5412	1.1363	0.685552	0.069353
42.717	8.1069	0.639474	0.484003	42.717	1.4711	0.688385	0.0897872
42.8928	6.3303	0.642106	0.377935	42.8928	1.6094	0.691218	0.0982282
43.0686	7.6932	0.644738	0.459304	43.0686	2.1785	0.694051	0.132963
43.2444	5.4879	0.647369	0.327642	43.2444	2.3116	0.696884	0.141086
43.4202	2.3	0.650001	0.137316	43.4202	3.2782	0.699718	0.200082
43.5959	3.1839	0.652631	0.190087	43.5959	3.2211	0.702549	0.196597
43.7717	4.2182	0.655263	0.251837	43.7717	1.6391	0.705382	0.100041
43.9475	4.2271	0.657895	0.252369	43.9475	1.5424	0.708215	0.0941389
44.1233	4.5508	0.660526	0.271694	44.1233	1.5219	0.711048	0.0928877
44.2991	2.1576	0.663158	0.128814	44.2991	1.5131	0.713881	0.0923506
44.4749	1.7282	0.66579	0.103178	44.4749	3.3695	0.716714	0.205654
44.6507	2.4214	0.668422	0.144564	44.6507	1.4194	0.719547	0.0866317
44.8265	2.8158	0.671053	0.16811	44.8265	3.4448	0.72238	0.21025
45.0023	2.3145	0.673685	0.138182	45.0023	2.2008	0.725213	0.134324
45.1781	2.644	0.676317	0.157854	45.1781	2.4759	0.728046	0.151114
45.3538	2.6646	0.678947	0.159083	45.3538	1.9518	0.730878	0.119126
45.5296	4.6891	0.681579	0.279951	45.5296	3.1485	0.733711	0.192166
45.7054	4.0083	0.684211	0.239306	45.7054	8.0325	0.736544	0.490256
45.8812	5.2119	0.686842	0.311164	45.8812	7.3651	0.739377	0.449522
46.057	5.4869	0.689474	0.327582	46.057	5.9893	0.74221	0.365551
46.2328	5.9724	0.692106	0.356568	46.2328	3.0889	0.745043	0.188528
46.4086	8.7055	0.694737	0.519741	46.4086	7.7603	0.747876	0.473642
46.5844	9.2438	0.697369	0.551879	46.5844	8.5806	0.750709	0.523709
46.7602	5.88	0.700001	0.351051	46.7602	8.4899	0.753542	0.518173
46.936	4.9713	0.702633	0.296799	46.936	10.6815	0.756375	0.651935
47.1117	9.4154	0.705263	0.562124	47.1117	10.2574	0.759206	0.626051
47.2875	9.9852	0.707895	0.596142	47.2875	14.0415	0.762039	0.857009
47.4633	4.0776	0.710526	0.243443	47.4633	11.711	0.764872	0.71477
47.6391	2.4797	0.713158	0.148044	47.6391	10.0447	0.767705	0.613069
47.8149	2.7534	0.71579	0.164385	47.8149	7.2951	0.770538	0.445249
47.9907	1.9073	0.718422	0.113871	47.9907	6.4757	0.773371	0.395238
48.1665	1.7756	0.721053	0.106008	48.1665	4.7671	0.776204	0.290955
48.3423	1.9778	0.723685	0.11808	48.3423	6.0391	0.779037	0.368591
48.5181	2.7514	0.726317	0.164266	48.5181	2.6469	0.78187	0.161551
48.6939	4.3263	0.728948	0.258291	48.6939	5.5535	0.784703	0.338953
48.8697	4.6759	0.73158	0.279163	48.8697	4.5492	0.787536	0.277656
49.0454	3.4787	0.73421	0.207687	49.0454	4.0602	0.790368	0.24781
49.2212	3.6482	0.736842	0.217807	49.2212	6.9122	0.793201	0.421879
49.397	3.186	0.739474	0.190212	49.397	3.5298	0.796034	0.215438
49.5728	3.3227	0.742106	0.198374	49.5728	8.7231	0.798867	0.532406
49.7486	3.4526	0.744737	0.206129	49.7486	11.5731	0.8017	0.706353
49.9244	5.4601	0.747369	0.325982	49.9244	9.4858	0.804533	0.578957
50.1002	8.25	0.750001	0.492546	50.1002	8.516	0.807366	0.519766
50.276	12.5857	0.752632	0.751399	50.276	8.5311	0.810199	0.520687
50.4518	16.7497	0.755264	1	50.4518	7.7201	0.813032	0.471189
50.6276	12.162	0.757896	0.726103	50.6276	5.9295	0.815865	0.361901
50.8033	9.1172	0.760526	0.54432	50.8033	9.7852	0.818696	0.59723
50.9791	11.1524	0.763158	0.665827	50.9791	9.5295	0.821529	0.581624
51.1549	8.6161	0.76579	0.514403	51.1549	8.314	0.824362	0.507437
51.3307	5.5496	0.768421	0.331325	51.3307	8.4118	0.827195	0.513406
51.5065	6.089	0.771053	0.363529	51.5065	8.6755	0.830028	0.529501
51.6823	4.8725	0.773685	0.290901	51.6823	7.6198	0.832861	0.465067
51.8581	4.831	0.776317	0.288423	51.8581	15.1653	0.835694	0.9256
52.0339	6.4879	0.778948	0.387344	52.0339	15.4474	0.838527	0.942817
52.2097	5.9692	0.78158	0.356377	52.2097	16.3843	0.84136	1
52.3855	5.0045	0.784212	0.298781	52.3855	12.4481	0.844194	0.759758
52.5612	5.7092	0.786842	0.340854	52.5612	10.4319	0.847025	0.636701
52.737	8.41	0.789474	0.502099	52.737	6.3798	0.849858	0.389385
52.9128	10.0454	0.792105	0.599736	52.9128	8.2532	0.852691	0.503726
53.0886	10.4715	0.794737	0.625175	53.0886	10.2964	0.855524	0.628431
53.2644	10.5767	0.797369	0.631456	53.2644	13.968	0.858357	0.852523
53.4402	9.2	0.800001	0.549264	53.4402	11.4755	0.86119	0.700396
53.616	7.1676	0.802632	0.427924	53.616	9.4306	0.864023	0.575588
53.7918	8.3254	0.805264	0.497048	53.7918	10.1773	0.866856	0.621162
53.9676	7.6661	0.807896	0.457686	53.9676	6.2875	0.869689	0.383752
54.1434	7.7429	0.810528	0.462271	54.1434	12.8438	0.872522	0.783909
54.3191	8.2386	0.813158	0.491866	54.3191	8.2434	0.875354	0.503128
54.4949	6.7147	0.815789	0.400885	54.4949	9.109	0.878187	0.555959
54.6707	7.7201	0.818421	0.46091	54.6707	10.7405	0.88102	0.655536
54.8465	6.4761	0.821053	0.38664	54.8465	9.5527	0.883853	0.58304
55.0223	8.3625	0.823685	0.499263	55.0223	10.8701	0.886686	0.663446
55.1981	12.0539	0.826316	0.719649	55.1981	12.1165	0.889519	0.739519
55.3739	15.7576	0.828948	0.940769	55.3739	12.2258	0.892352	0.74619
55.5497	12.0842	0.83158	0.721458	55.5497	15.8498	0.895185	0.967377
55.7255	10.4021	0.834212	0.621032	55.7255	14.1076	0.898018	0.861044
55.9013	6.4013	0.836843	0.382174	55.9013	7.6132	0.900851	0.464664
56.077	3.6182	0.839474	0.216016	56.077	5.3888	0.903682	0.3289
56.2528	5.2742	0.842105	0.314883	56.2528	8.2278	0.906515	0.502176
56.4286	8.0362	0.844737	0.479782	56.4286	9.753	0.909348	0.595265
56.6044	11.0002	0.847369	0.65674	56.6044	9.8169	0.912181	0.599165
56.7802	12.4	0.85	0.740312	56.7802	10.7256	0.915014	0.654627
56.956	14.0618	0.852632	0.839525	56.956	8.8792	0.917847	0.541933
57.1318	15.5159	0.855264	0.926339	57.1318	11.6388	0.92068	0.710363
57.3076	6.9315	0.857896	0.413828	57.3076	10.195	0.923513	0.622242
57.4834	4.0859	0.860527	0.243939	57.4834	7.361	0.926346	0.449272
57.6592	6.5536	0.863159	0.391267	57.6592	6.4714	0.929179	0.394976
57.8349	10.7141	0.865789	0.639659	57.8349	7.8635	0.932011	0.479941
58.0107	9.7368	0.868421	0.581312	58.0107	7.3287	0.934844	0.4473
58.1865	7.457	0.871053	0.445202	58.1865	11.9515	0.937677	0.729448
58.3623	8.1275	0.873685	0.485233	58.3623	9.35	0.94051	0.570668
58.5381	11.2115	0.876316	0.669355	58.5381	8.6033	0.943343	0.525094
58.7139	7.9191	0.878948	0.472791	58.7139	10.4722	0.946176	0.639161
58.8897	7.3809	0.88158	0.440659	58.8897	11.817	0.949009	0.721239
59.0655	2.4403	0.884211	0.145692	59.0655	8.7996	0.951842	0.537075
59.2413	3.7089	0.886843	0.221431	59.2413	11.3507	0.954675	0.692779
59.4171	6.136	0.889475	0.366335	59.4171	10.4671	0.957508	0.638849
59.5928	7.9317	0.892105	0.473543	59.5928	6.2136	0.960339	0.379241
59.7686	10.8476	0.894737	0.64763	59.7686	12.7574	0.963172	0.778636
59.9444	9.099	0.897369	0.543234	59.9444	11.8802	0.966005	0.725097
60.1202	5.96	0.9	0.355827	60.1202	9.2946	0.968838	0.567287
60.296	9.189	0.902632	0.548607	60.296	8.8428	0.971671	0.539712
60.4718	4.9597	0.905264	0.296107	60.4718	11.9265	0.974504	0.727922
60.6476	5.0852	0.907895	0.303599	60.6476	8.5062	0.977337	0.519168
60.8234	7.7624	0.910527	0.463435	60.8234	10.9032	0.98017	0.665466
60.9992	7.9671	0.913159	0.475656	60.9992	7.0047	0.983003	0.427525
61.175	7.2239	0.915791	0.431285	61.175	5.1969	0.985837	0.317188
61.3507	6.5151	0.918421	0.388968	61.3507	8.9343	0.988668	0.545296
61.5265	5.5235	0.921053	0.329767	61.5265	6.7745	0.991501	0.413475
61.7023	7.7947	0.923684	0.465364	61.7023	10.7763	0.994334	0.657721
61.8781	5.0129	0.926316	0.299283	61.8781	4.9122	0.997167	0.299811
62.0539	7.9991	0.928948	0.477567	62.0539	4	1	0.244136
62.2297	9.8494	0.93158	0.588034
62.4055	8.9162	0.934211	0.53232
62.5813	9.5853	0.936843	0.572267
62.7571	5.0387	0.939475	0.300823
62.9329	6.5556	0.942106	0.391386
63.1087	4.732	0.944738	0.282513
63.2844	7.7285	0.947368	0.461411
63.4602	11.65	0.95	0.695535
63.636	5.4626	0.952632	0.326131
63.8118	7.6248	0.955264	0.45522
63.9876	7.5416	0.957895	0.450253
64.1634	4.5817	0.960527	0.273539
64.3392	4.2211	0.963159	0.25201
64.515	6.623	0.965791	0.39541
64.6908	1.352	0.968422	0.0807179
64.8665	3.1334	0.971052	0.187072
65.0423	5.2909	0.973684	0.31588
65.2181	5.7591	0.976316	0.343833
65.3939	9.7402	0.978948	0.581515
65.5697	9.5134	0.981579	0.567974
65.7455	3.3918	0.984211	0.202499
65.9213	3.5845	0.986843	0.214004
66.0971	5.1505	0.989475	0.307498
66.2729	2.32	0.992106	0.13851
66.4487	5.3782	0.994738	0.321092
66.6245	7.6191	0.99737	0.45488
66.8002	3	1	0.179108

## Sheet: 8 cell
X	Y			X	Y			X	Y			X	Y			X	Y			X	Y
0	23	0	0.699201	0	11	0	0.583604	0	21	0	0.780991	0	20	0	0.74905	0	16	0	0.559527	0	16	0	0.57971
0.1758	14.4331	0.00438622	0.438767	0.1758	12.4233	0.00518164	0.659117	0.1758	23.2431	0.0041669	0.864412	0.1758	11.6063	0.00460855	0.434685	0.1758	16.6568	0.00555587	0.582495	0.1758	19.6158	0.00537664	0.710717
0.3516	14.3721	0.00877243	0.436912	0.3516	9.8682	0.0103633	0.523556	0.3516	19.7778	0.00833381	0.735538	0.3516	15.5576	0.0092171	0.582671	0.3516	9.7284	0.0111117	0.340206	0.3516	19.6086	0.0107533	0.710457
0.5274	16.349	0.0131586	0.49701	0.5274	11.2042	0.0155449	0.594438	0.5274	19.5	0.0125007	0.725206	0.5274	14.7939	0.0138256	0.554068	0.5274	18.5333	0.0166676	0.648117	0.5274	21.1332	0.0161299	0.765696
0.7032	11.8947	0.0175449	0.361599	0.7032	12.5953	0.0207265	0.668242	0.7032	9.5556	0.0166676	0.355373	0.7032	17.1284	0.0184342	0.641501	0.7032	18.6701	0.0222235	0.652901	0.7032	22.5813	0.0215066	0.818163
0.879	13.0554	0.0219311	0.396885	0.879	12.5418	0.0259082	0.665404	0.879	14.2101	0.0208345	0.528475	0.879	26.7005	0.0230427	1	0.879	15.5123	0.0277794	0.542472	0.879	20.5191	0.0268832	0.743446
1.0547	12.9806	0.0263148	0.394611	1.0547	9.3678	0.0310869	0.497008	1.0547	12.875	0.0249991	0.478822	1.0547	19.3496	0.0276487	0.724691	1.0547	22.4222	0.0333321	0.784114	1.0547	18.0905	0.0322568	0.655453
1.2305	11.1274	0.030701	0.338273	1.2305	11.8086	0.0362685	0.626504	1.2305	20.5972	0.029166	0.766011	1.2305	21.4839	0.0322572	0.804625	1.2305	16.9541	0.0388879	0.592892	1.2305	14.5756	0.0376334	0.528101
1.4063	11.5919	0.0350872	0.352394	1.4063	15.67	0.0414502	0.83137	1.4063	20.6667	0.0333329	0.768596	1.4063	14.5003	0.0368658	0.543072	1.4063	23.0894	0.0444438	0.807446	1.4063	19.2597	0.0430101	0.697815
1.5821	15.518	0.0394735	0.471748	1.5821	11.9883	0.0466318	0.636038	1.5821	19.875	0.0374998	0.739153	1.5821	10.655	0.0414743	0.399056	1.5821	21.16	0.0499997	0.739974	1.5821	18.1675	0.0483867	0.658243
1.7579	16.3259	0.0438597	0.496308	1.7579	8.5589	0.0518134	0.454092	1.7579	13.8958	0.0416667	0.516786	1.7579	14.9342	0.0460829	0.559323	1.7579	14.5556	0.0555556	0.509015	1.7579	18.5699	0.0537633	0.672822
1.9337	10.3638	0.0482459	0.31506	1.9337	9.2036	0.0569951	0.488296	1.9337	13.2587	0.0458336	0.493092	1.9337	13.3515	0.0506914	0.500047	1.9337	12.083	0.0611114	0.422548	1.9337	13.8728	0.05914	0.502638
2.1095	9.518	0.0526321	0.289348	2.1095	9.5073	0.0621767	0.504409	2.1095	14	0.0500005	0.520661	2.1095	17.7123	0.0553	0.66337	2.1095	12.4356	0.0666673	0.434878	2.1095	13.2674	0.0645166	0.480703
2.2853	12.3934	0.0570183	0.37676	2.2853	15.1842	0.0673583	0.805596	2.2853	12.5538	0.0541674	0.466877	2.2853	17.8466	0.0599085	0.668399	2.2853	15.4588	0.0722232	0.540601	2.2853	14.8421	0.0698933	0.537757
2.4611	9.7073	0.0614045	0.295102	2.4611	15.5357	0.07254	0.824245	2.4611	10.4306	0.0583343	0.387915	2.4611	16.4516	0.0645171	0.616153	2.4611	22.5249	0.077779	0.787705	2.4611	19.9248	0.0752699	0.721913
2.6369	10.892	0.0657908	0.331117	2.6369	11.3316	0.0777216	0.601197	2.6369	10.3438	0.0625012	0.384687	2.6369	16.79	0.0691256	0.628827	2.6369	17.5556	0.0833349	0.613927	2.6369	11.9865	0.0806465	0.434293
2.8126	14.0933	0.0701745	0.428437	2.8126	5.487	0.0829003	0.291112	2.8126	12.1111	0.0666657	0.450413	2.8126	14.2857	0.0737315	0.535035	2.8126	15.2879	0.0888876	0.534624	2.8126	16.6824	0.0860201	0.604435
2.9884	11.3066	0.0745607	0.343721	2.9884	8.5041	0.0880819	0.451184	2.9884	18.6615	0.0708326	0.694022	2.9884	15.4286	0.0783401	0.577839	2.9884	15.4647	0.0944435	0.540807	2.9884	15.2505	0.0913968	0.552554
3.1642	8.8061	0.0789469	0.267706	3.1642	8.896	0.0932636	0.471976	3.1642	18.0625	0.0749995	0.671746	3.1642	18.3963	0.0829486	0.688987	3.1642	18.6	0.0999994	0.65045	3.1642	11.1904	0.0967734	0.405449
3.34	9.6667	0.0833331	0.293868	3.34	10.3594	0.0984452	0.549617	3.34	16.8785	0.0791664	0.627713	3.34	12.1159	0.0875572	0.453771	3.34	18.7637	0.105555	0.656174	3.34	8.4458	0.10215	0.306007
3.5158	8.8966	0.0877193	0.270457	3.5158	8.8774	0.103627	0.47099	3.5158	11.3056	0.0833333	0.420456	3.5158	11.0461	0.0921657	0.413704	3.5158	19.4444	0.111111	0.679979	3.5158	8.504	0.107527	0.308116
3.6916	11.9668	0.0921056	0.363791	3.6916	8.4883	0.108808	0.450346	3.6916	13.4688	0.0875002	0.500906	3.6916	9.4839	0.0967743	0.355196	3.6916	16.9844	0.116667	0.593952	3.6916	13.333	0.112903	0.48308
3.8674	16.0942	0.0964918	0.489264	3.8674	8.6202	0.11399	0.457344	3.8674	8.1528	0.0916671	0.303203	3.8674	15.8789	0.101383	0.594704	3.8674	15.0237	0.122223	0.525385	3.8674	12.4179	0.11828	0.449924
4.0432	15.4691	0.100878	0.470261	4.0432	11.6141	0.119172	0.616185	4.0432	10.566	0.095834	0.39295	4.0432	21.9401	0.105991	0.821711	4.0432	17.0578	0.127779	0.596518	4.0432	15.0029	0.123657	0.543583
4.219	13.8172	0.105264	0.420043	4.219	8.2933	0.124353	0.44	4.219	14	0.100001	0.520661	4.219	19.2238	0.1106	0.719979	4.219	17.9689	0.133335	0.62838	4.219	16.9324	0.129033	0.613493
4.3948	18.6777	0.10965	0.567803	4.3948	9.5487	0.129535	0.506605	4.3948	6.6875	0.104168	0.248709	4.3948	16.6103	0.115208	0.622097	4.3948	18.7778	0.13889	0.656667	4.3948	12.9814	0.13441	0.470341
4.5705	22.5651	0.114034	0.68598	4.5705	9.3546	0.134714	0.496307	4.5705	14.0278	0.108332	0.521695	4.5705	10.0158	0.119814	0.375117	4.5705	17.8385	0.144443	0.62382	4.5705	13.6608	0.139783	0.494957
4.7463	17.2853	0.11842	0.525474	4.7463	7.1429	0.139895	0.378966	4.7463	8.9688	0.112499	0.33355	4.7463	9.5313	0.124423	0.356971	4.7463	21.46	0.149999	0.750465	4.7463	9.6139	0.14516	0.34833
4.9221	11.7793	0.122807	0.358091	4.9221	6.9257	0.145077	0.367442	4.9221	8.8889	0.116666	0.330579	4.9221	17.7419	0.129031	0.664478	4.9221	28.5768	0.155555	0.999343	4.9221	8.4924	0.150537	0.307696
5.0979	13.9197	0.127193	0.423159	5.0979	5.7999	0.150259	0.307713	5.0979	11.1736	0.120833	0.415547	5.0979	15.2982	0.13364	0.572956	5.0979	25.8356	0.161111	0.903482	5.0979	12.9385	0.155913	0.468786
5.2737	11.9806	0.131579	0.364211	5.2737	3.7849	0.15544	0.200807	5.2737	13.5625	0.125	0.50439	5.2737	15.7011	0.138249	0.588045	5.2737	15.5556	0.166667	0.543986	5.2737	19.871	0.16129	0.719964
5.4495	12.6242	0.135965	0.383776	5.4495	4.8173	0.160622	0.255581	5.4495	14.4045	0.129167	0.535704	5.4495	11.5102	0.142857	0.431086	5.4495	17.7585	0.172223	0.621022	5.4495	18.6667	0.166667	0.67633
5.6253	11.0849	0.140351	0.336981	5.6253	15.668	0.165804	0.831264	5.6253	10.4444	0.133334	0.388428	5.6253	12.0553	0.147466	0.451501	5.6253	22.7131	0.177778	0.794287	5.6253	11.0016	0.172043	0.398609
5.8011	14.0249	0.144738	0.426357	5.8011	16.1379	0.170985	0.856195	5.8011	10.4062	0.137501	0.387007	5.8011	18.9243	0.152074	0.708762	5.8011	18.4667	0.183334	0.645788	5.8011	10.3538	0.17742	0.375138
5.9769	15.9575	0.149124	0.485109	5.9769	15.8091	0.176167	0.83875	5.9769	10.875	0.141668	0.404442	5.9769	12.1389	0.156683	0.454632	5.9769	15.6089	0.18889	0.54585	5.9769	11.2945	0.182797	0.409221
6.1527	18.4174	0.15351	0.55989	6.1527	9.8412	0.181348	0.522124	6.1527	14.0712	0.145835	0.523309	6.1527	15.5806	0.161291	0.583532	6.1527	18.179	0.194446	0.635727	6.1527	10.6572	0.188173	0.38613
6.3284	22.4404	0.157894	0.682189	6.3284	11.661	0.186527	0.618673	6.3284	14.75	0.149999	0.548553	6.3284	12.4872	0.165897	0.467677	6.3284	17.28	0.199999	0.604289	6.3284	9.6004	0.193547	0.347841
6.5042	15.9566	0.16228	0.485081	6.5042	16.1019	0.191709	0.854285	6.5042	13.1632	0.154166	0.48954	6.5042	10.9197	0.170506	0.40897	6.5042	19.321	0.205555	0.675663	6.5042	10.6676	0.198923	0.386507
6.68	12.3333	0.166666	0.374933	6.68	15.2613	0.19689	0.809687	6.68	10.6667	0.158333	0.396695	6.68	10.9743	0.175114	0.411015	6.68	26.0593	0.21111	0.911305	6.68	11.9868	0.2043	0.434304
6.8558	16.0111	0.171052	0.486738	6.8558	11.7	0.202072	0.620742	6.8558	13.0156	0.1625	0.484051	6.8558	14.8282	0.179723	0.555353	6.8558	28.5956	0.216666	1	6.8558	14.7045	0.209677	0.532772
7.0316	17.8587	0.175439	0.542905	7.0316	14.6586	0.207254	0.777711	7.0316	17.6667	0.166667	0.657026	7.0316	11.8762	0.184331	0.444793	7.0316	27.3333	0.222222	0.955857	7.0316	17.7552	0.215053	0.643304
7.2074	20.5254	0.179825	0.623973	7.2074	13.5764	0.212435	0.720295	7.2074	16.7448	0.170834	0.62274	7.2074	14.1119	0.18894	0.528526	7.2074	19.9667	0.227778	0.698244	7.2074	18.8182	0.22043	0.681819
7.3832	20.4127	0.184211	0.620547	7.3832	11.5181	0.217617	0.611092	7.3832	14.625	0.175	0.543905	7.3832	10.6452	0.193549	0.398689	7.3832	20.3289	0.233334	0.71091	7.3832	22.743	0.225807	0.824022
7.559	20.2096	0.188597	0.614373	7.559	14.8312	0.222799	0.786868	7.559	9.1597	0.179167	0.34065	7.559	12.5951	0.198157	0.471718	7.559	16.4291	0.23889	0.574532	7.559	17.6956	0.231183	0.641145
7.7348	17.229	0.192984	0.523762	7.7348	12.5619	0.22798	0.66647	7.7348	11.25	0.183334	0.418388	7.7348	9.0941	0.202766	0.340597	7.7348	22.9684	0.244446	0.803214	7.7348	16.0525	0.23656	0.581612
7.9106	15.4155	0.19737	0.468632	7.9106	11.8421	0.233162	0.628281	7.9106	7.2188	0.187501	0.268468	7.9106	12.7176	0.207374	0.476306	7.9106	16	0.250002	0.559527	7.9106	16.3777	0.241937	0.593395
8.0863	16.2909	0.201753	0.495244	8.0863	14.3103	0.238341	0.759232	8.0863	5.5833	0.191666	0.207643	8.0863	12.9223	0.21198	0.483972	8.0863	19.8306	0.255554	0.693484	8.0863	15.0764	0.24731	0.546246
8.2621	23.7082	0.20614	0.72073	8.2621	9.8526	0.243522	0.522729	8.2621	3.4774	0.195833	0.129325	8.2621	11.7413	0.216589	0.439741	8.2621	9.836	0.26111	0.343969	8.2621	15.644	0.252687	0.566812
8.4379	26.4321	0.210526	0.803537	8.4379	10.2878	0.248704	0.545818	8.4379	4	0.2	0.14876	8.4379	11.526	0.221197	0.431677	8.4379	22.8133	0.266666	0.797791	8.4379	15.4516	0.258063	0.559841
8.6137	21.4663	0.214912	0.652576	8.6137	13.1708	0.253885	0.698775	8.6137	5.5816	0.204166	0.20758	8.6137	12.3871	0.225806	0.463928	8.6137	11.9383	0.272222	0.417487	8.6137	11.9556	0.26344	0.433174
8.7895	18.9197	0.219298	0.57516	8.7895	15.551	0.259067	0.825057	8.7895	3.6667	0.208333	0.136365	8.7895	13.9842	0.230414	0.523743	8.7895	12.679	0.277778	0.44339	8.7895	14.9963	0.268817	0.543344
8.9653	15.1967	0.223685	0.46198	8.9653	17.2571	0.264249	0.915574	8.9653	2.8125	0.2125	0.104597	8.9653	14.5484	0.235023	0.544874	8.9653	10.7844	0.283334	0.377135	8.9653	12.4995	0.274193	0.45288
9.1411	16.7082	0.228071	0.50793	9.1411	17.7464	0.26943	0.941533	9.1411	4.5278	0.216667	0.168389	9.1411	11.7953	0.239631	0.441763	9.1411	11.7674	0.28889	0.411511	9.1411	14.0212	0.27957	0.508014
9.3169	14.1136	0.232457	0.429054	9.3169	10.5182	0.274612	0.558042	9.3169	6.4514	0.220834	0.239928	9.3169	14.3535	0.24424	0.537574	9.3169	15.9563	0.294445	0.557998	9.3169	17.4187	0.284947	0.631112
9.4927	9.9972	0.236843	0.303915	9.4927	13.4395	0.279794	0.713031	9.4927	6.125	0.225001	0.227789	9.4927	11.8953	0.248849	0.445509	9.4927	13.84	0.300001	0.483991	9.4927	14.0947	0.290323	0.510678
9.6685	12.9067	0.241229	0.392364	9.6685	11.893	0.284975	0.630982	9.6685	4.1233	0.229168	0.153346	9.6685	12.5168	0.253457	0.468785	9.6685	20.1049	0.305557	0.703077	9.6685	10.8675	0.2957	0.39375
9.8442	9.9945	0.245613	0.303833	9.8442	9.1354	0.290154	0.484678	9.8442	4.1111	0.233332	0.152892	9.8442	11.5161	0.258063	0.431307	9.8442	21.5264	0.31111	0.752787	9.8442	13.9022	0.301073	0.503703
10.02	15	0.249999	0.456001	10.02	9.8479	0.295336	0.522479	10.02	3.3906	0.237499	0.126097	10.02	9.1014	0.262672	0.34087	10.02	21.9822	0.316666	0.768727	10.02	19.4943	0.30645	0.706315
10.1958	10.0369	0.254386	0.305122	10.1958	10.531	0.300517	0.558721	10.1958	5.9236	0.241666	0.220299	10.1958	7.4147	0.26728	0.277699	10.1958	20.6627	0.322222	0.722583	10.1958	17.308	0.311827	0.627101
10.3716	7.9954	0.258772	0.24306	10.3716	6.6013	0.305699	0.350231	10.3716	4.3854	0.245833	0.163093	10.3716	7.2238	0.271889	0.270549	10.3716	21.0096	0.327777	0.734714	10.3716	13.1227	0.317203	0.47546
10.5474	12.4792	0.263158	0.379368	10.5474	8.1165	0.310881	0.43062	10.5474	1.75	0.25	0.0650826	10.5474	7.0974	0.276497	0.265815	10.5474	20	0.333333	0.699408	10.5474	11.6254	0.32258	0.42121
10.7232	12.2087	0.267544	0.371145	10.7232	10.4327	0.316062	0.553506	10.7232	2.184	0.254167	0.0812231	10.7232	8.8683	0.281106	0.33214	10.7232	15.3644	0.338889	0.537299	10.7232	13.109	0.327957	0.474964
10.899	14.5328	0.27193	0.441798	10.899	12.5131	0.321244	0.663881	10.899	5.2083	0.258334	0.193697	10.899	7.3469	0.285714	0.27516	10.899	15.8879	0.344445	0.555606	10.899	13.8889	0.333333	0.503221
11.0748	18.1745	0.276317	0.552505	11.0748	11.747	0.326425	0.623236	11.0748	5.7344	0.262501	0.213263	11.0748	7.2903	0.290323	0.27304	11.0748	16.26	0.350001	0.568619	11.0748	18.3496	0.33871	0.664841
11.2506	15.7821	0.280703	0.479776	11.2506	10.0896	0.331607	0.535303	11.2506	6.7778	0.266668	0.252067	11.2506	8.4279	0.294931	0.315646	11.2506	15.7294	0.355557	0.550064	11.2506	17.157	0.344087	0.62163
11.4264	14.6611	0.285089	0.445698	11.4264	9.5795	0.336789	0.508239	11.4264	5.908	0.270835	0.219719	11.4264	7.9598	0.29954	0.298114	11.4264	15.2593	0.361113	0.533624	11.4264	14.9787	0.349463	0.542707
11.6021	19.2604	0.289473	0.585517	11.6021	12.9935	0.341967	0.689369	11.6021	2.125	0.274999	0.0790289	11.6021	11.108	0.304146	0.416022	11.6021	16.1556	0.366665	0.564968	11.6021	9.1446	0.354837	0.331326
11.7779	20.1283	0.293859	0.611901	11.7779	10.7432	0.347149	0.569979	11.7779	1.6597	0.279166	0.0617244	11.7779	7.5411	0.308754	0.282433	11.7779	22.9042	0.372221	0.800969	11.7779	8.1157	0.360213	0.294047
11.9537	18.3112	0.298245	0.556661	11.9537	9.331	0.352331	0.495055	11.9537	6.0833	0.283333	0.226238	11.9537	9.6234	0.313363	0.36042	11.9537	23.4469	0.377777	0.819948	11.9537	13.1125	0.36559	0.475091
12.1295	22.6454	0.302631	0.688421	12.1295	14.9119	0.357512	0.791149	12.1295	10.0469	0.2875	0.373645	12.1295	7.0619	0.317972	0.264486	12.1295	18.8267	0.383333	0.658378	12.1295	11.6264	0.370967	0.421246
12.3053	16.8975	0.307018	0.513685	12.3053	11.6788	0.362694	0.619618	12.3053	6.625	0.291667	0.246384	12.3053	5.4194	0.32258	0.20297	12.3053	18.0123	0.388889	0.629898	12.3053	15.717	0.376343	0.569457
12.4811	12.5882	0.311404	0.382682	12.4811	11.9741	0.367876	0.635285	12.4811	8.5017	0.295834	0.316179	12.4811	5.7024	0.327189	0.213569	12.4811	17.5778	0.394445	0.614703	12.4811	22.6292	0.38172	0.819899
12.6569	10.7147	0.31579	0.325727	12.6569	10.5738	0.373057	0.560992	12.6569	7	0.3	0.26033	12.6569	7.1086	0.331797	0.266235	12.6569	12.68	0.400001	0.443425	12.6569	19.4943	0.387097	0.706315
12.8327	7.386	0.320176	0.224535	12.8327	9.1495	0.378239	0.485426	12.8327	11.8767	0.304167	0.441695	12.8327	8.7202	0.336406	0.326593	12.8327	13.0679	0.405557	0.45699	12.8327	16.5381	0.392473	0.599207
13.0085	8.7498	0.324563	0.265994	13.0085	9.4717	0.383421	0.50252	13.0085	13.6042	0.308334	0.505941	13.0085	7.4273	0.341014	0.278171	13.0085	16.718	0.411112	0.584635	13.0085	15.7076	0.39785	0.569116
13.1843	16.7452	0.328949	0.509055	13.1843	9.5029	0.388602	0.504175	13.1843	10.5781	0.312501	0.3934	13.1843	9.3509	0.345623	0.350214	13.1843	18.1111	0.416668	0.633353	13.1843	15.7066	0.403227	0.56908
13.36	17	0.333333	0.516801	13.36	11.1122	0.393781	0.589557	13.36	10.5	0.316666	0.390496	13.36	8.3799	0.350229	0.313848	13.36	19.9689	0.422221	0.698321	13.36	15.8903	0.4086	0.575736
13.5358	13.4386	0.337719	0.408534	13.5358	17.07	0.398962	0.905647	13.5358	15.7622	0.320833	0.586197	13.5358	10.8065	0.354837	0.40473	13.5358	14.4602	0.427777	0.505679	13.5358	14.6763	0.413977	0.53175
13.7116	15.8089	0.342105	0.480591	13.7116	15.9592	0.404144	0.846714	13.7116	18.25	0.325	0.678719	13.7116	11.5319	0.359446	0.431898	13.7116	15.8222	0.433333	0.553309	13.7116	18.333	0.419353	0.664239
13.8874	20.88	0.346491	0.634753	13.8874	11.3368	0.409326	0.601473	13.8874	19.2552	0.329166	0.716102	13.8874	7.5109	0.364054	0.281302	13.8874	21.3563	0.438889	0.746839	13.8874	17.5345	0.42473	0.635308
14.0632	19.2641	0.350877	0.585629	14.0632	11.2281	0.414507	0.595706	14.0632	17	0.333333	0.632231	14.0632	9.0474	0.368663	0.338848	14.0632	14.3951	0.444444	0.503403	14.0632	19.7204	0.430107	0.714507
14.239	17.9086	0.355264	0.544422	14.239	14.5414	0.419689	0.771493	14.239	11.6719	0.3375	0.434079	14.239	9.0356	0.373271	0.338406	14.239	12.02	0.45	0.420344	14.239	18.2893	0.435483	0.662656
14.4148	13.3684	0.35965	0.4064	14.4148	15.6893	0.424871	0.832394	14.4148	8.4236	0.341667	0.313274	14.4148	13.4483	0.37788	0.503672	14.4148	14.2904	0.455556	0.499741	14.4148	17.1313	0.44086	0.620699
14.5906	17.6233	0.364036	0.535749	14.5906	8.7522	0.430052	0.464347	14.5906	11.3524	0.345834	0.422197	14.5906	7.0586	0.382489	0.264362	14.5906	16.6464	0.461112	0.582132	14.5906	17.4503	0.446237	0.632257
14.7664	24.5152	0.368422	0.745263	14.7664	12.6221	0.435234	0.669664	14.7664	15.5	0.350001	0.576446	14.7664	7.0968	0.387097	0.265793	14.7664	13.1689	0.466668	0.460522	14.7664	12.4964	0.451613	0.452768
14.9422	15.8209	0.372808	0.480956	14.9422	8.5043	0.440416	0.451195	14.9422	12.8333	0.354168	0.477271	14.9422	11.657	0.391706	0.436584	14.9422	12.6543	0.472224	0.442526	14.9422	12.7306	0.45699	0.461254
15.1179	21.2068	0.377192	0.644687	15.1179	8.5909	0.445594	0.455789	15.1179	11.3403	0.358332	0.421747	15.1179	14.6313	0.396312	0.547979	15.1179	11.6607	0.477777	0.40778	15.1179	18.2597	0.462364	0.661583
15.2937	21.5097	0.381578	0.653896	15.2937	7.5774	0.450776	0.402018	15.2937	14.5781	0.362499	0.542161	15.2937	15.4799	0.40092	0.579761	15.2937	11.3178	0.483332	0.395788	15.2937	12.7607	0.46774	0.462344
15.4695	17.7544	0.385965	0.539734	15.4695	8.5982	0.455958	0.456177	15.4695	16.5556	0.366666	0.615704	15.4695	13.892	0.405529	0.52029	15.4695	18.4153	0.488888	0.643991	15.4695	13.8308	0.473117	0.501116
15.6453	11.1533	0.390351	0.339061	15.6453	8.3702	0.461139	0.44408	15.6453	15	0.370833	0.557851	15.6453	16.9631	0.410137	0.63531	15.6453	11.8521	0.494444	0.414473	15.6453	17.9633	0.478493	0.650844
15.8211	16.2992	0.394737	0.495496	15.8211	8.5553	0.466321	0.453901	15.8211	16.25	0.375	0.604339	15.8211	10.0645	0.414746	0.376941	15.8211	14	0.5	0.489586	15.8211	14.6306	0.48387	0.530094
15.9969	17.9797	0.399123	0.546583	15.9969	8.7073	0.471502	0.461965	15.9969	16.6024	0.379167	0.617444	15.9969	6.1935	0.419354	0.231962	15.9969	14.9235	0.505556	0.521881	15.9969	11.1823	0.489247	0.405156
16.1727	24.8467	0.403509	0.755341	16.1727	15.6639	0.476684	0.831047	16.1727	11.25	0.383334	0.418388	16.1727	8.3943	0.423963	0.314387	16.1727	18.8578	0.511112	0.659465	16.1727	16.1966	0.494623	0.586833
16.3485	31.0111	0.407896	0.942738	16.3485	9.7237	0.481866	0.51589	16.3485	11.25	0.387501	0.418388	16.3485	6.4898	0.428571	0.243059	16.3485	22.6044	0.516668	0.790485	16.3485	15	0.5	0.543478
16.5243	31.0083	0.412282	0.942653	16.5243	9.0889	0.487047	0.482211	16.5243	13.3819	0.391668	0.497674	16.5243	10.3397	0.43318	0.387247	16.5243	27.2662	0.522223	0.95351	16.5243	12.1031	0.505377	0.438518
16.7001	26.3333	0.416668	0.800533	16.7001	9.974	0.492229	0.52917	16.7001	14.0729	0.395835	0.523372	16.7001	11.9473	0.437789	0.447456	16.7001	20.9815	0.527779	0.733732	16.7001	20.9923	0.510753	0.760591
16.8759	13.3047	0.421054	0.404463	16.8759	12.913	0.497411	0.685098	16.8759	15	0.400001	0.557851	16.8759	9.2798	0.442397	0.347552	16.8759	22.6222	0.533335	0.791108	16.8759	14.0697	0.51613	0.509772
17.0516	11.8356	0.425438	0.359803	17.0516	12.2107	0.502589	0.647837	17.0516	10.2847	0.404166	0.382489	17.0516	7.4187	0.447003	0.277849	17.0516	16.9022	0.538888	0.591077	17.0516	16.8666	0.521504	0.611109
17.2274	14.3703	0.429824	0.436858	17.2274	10.7454	0.507771	0.570096	17.2274	11.7014	0.408333	0.435176	17.2274	8.5484	0.451612	0.320159	17.2274	22.0652	0.544444	0.771629	17.2274	22.0323	0.52688	0.798272
17.4032	10.9723	0.43421	0.333558	17.4032	9.4261	0.512953	0.500101	17.4032	13.6719	0.4125	0.508459	17.4032	8.7182	0.45622	0.326518	17.4032	24.78	0.55	0.866567	17.4032	15.4568	0.532257	0.560029
17.579	10.8449	0.438597	0.329685	17.579	18.1899	0.518134	0.965063	17.579	19.7222	0.416667	0.73347	17.579	15.3772	0.460829	0.575914	17.579	20.9877	0.555556	0.733949	17.579	18.1142	0.537633	0.656312
17.7548	32.8947	0.442983	1	17.7548	18.8484	0.523316	1	17.7548	14.8351	0.420834	0.551718	17.7548	11.4444	0.465437	0.428621	17.7548	19.3052	0.561111	0.675111	17.7548	20.7816	0.54301	0.752957
17.9306	20.5097	0.447369	0.623496	17.9306	17.6399	0.528498	0.935883	17.9306	11.9375	0.425	0.443956	17.9306	10.8078	0.470046	0.404779	17.9306	21.5511	0.566667	0.753651	17.9306	25.6826	0.548387	0.930529
18.1064	18.807	0.451755	0.571733	18.1064	16.7311	0.533679	0.887667	18.1064	16.75	0.429167	0.622934	18.1064	14.2627	0.474654	0.534174	18.1064	18.4198	0.572223	0.644148	18.1064	17.9909	0.553763	0.651844
18.2822	17.9548	0.456142	0.545827	18.2822	8.4417	0.538861	0.447874	18.2822	21	0.433334	0.780991	18.2822	13.2205	0.479263	0.495141	18.2822	16.1027	0.577779	0.563118	18.2822	12.511	0.55914	0.453297
18.458	16.6898	0.460528	0.50737	18.458	8.118	0.544042	0.4307	18.458	16.5312	0.437501	0.614796	18.458	15.871	0.483871	0.594408	18.458	12.8333	0.583335	0.448786	18.458	10.1051	0.564517	0.366127
18.6338	10.9714	0.464914	0.333531	18.6338	8.0582	0.549224	0.427527	18.6338	14.7431	0.441668	0.548297	18.6338	19.3035	0.48848	0.722964	18.6338	14.3343	0.588891	0.501276	18.6338	13.8011	0.569893	0.50004
18.8095	9.5023	0.469298	0.28887	18.8095	6.7723	0.554403	0.359304	18.8095	10.2309	0.445833	0.380488	18.8095	15.5247	0.493086	0.581439	18.8095	14.5215	0.594443	0.507823	18.8095	18.1559	0.575267	0.657822
18.9853	10.3075	0.473684	0.313348	18.9853	17.0162	0.559584	0.902793	18.9853	10.5	0.45	0.390496	18.9853	16.9533	0.497694	0.634943	18.9853	13.16	0.599999	0.460211	18.9853	18.9906	0.580643	0.688065
19.1611	11.9067	0.47807	0.361964	19.1611	15.3472	0.564766	0.814244	19.1611	10.1632	0.454166	0.37797	19.1611	20.5418	0.502303	0.769341	19.1611	11.9133	0.605555	0.416613	19.1611	18.3752	0.58602	0.665768
19.3369	13.9307	0.482456	0.423494	19.3369	10.3851	0.569948	0.55098	19.3369	14.0278	0.458333	0.521695	19.3369	15.079	0.506912	0.564746	19.3369	13.1605	0.611111	0.460228	19.3369	21.814	0.591397	0.790362
19.5127	19.5069	0.486843	0.59301	19.5127	16.2546	0.575129	0.862386	19.5127	15.25	0.4625	0.567149	19.5127	13.0869	0.51152	0.490137	19.5127	14.3622	0.616667	0.502252	19.5127	20.3902	0.596773	0.738775
19.6885	18.3343	0.491229	0.557363	19.6885	13.5019	0.580311	0.716342	19.6885	13.5556	0.466667	0.504134	19.6885	10.0323	0.516129	0.375735	19.6885	11.7881	0.622223	0.412235	19.6885	15.1687	0.60215	0.549591
19.8643	25.8504	0.495615	0.785853	19.8643	8.5957	0.585493	0.456044	19.8643	8.0938	0.470834	0.301009	19.8643	14.368	0.520737	0.538117	19.8643	15.7301	0.627779	0.550088	19.8643	16.1851	0.607527	0.586417
20.0401	13	0.500001	0.3952	20.0401	7.6786	0.590674	0.407387	20.0401	9.3125	0.475001	0.346333	20.0401	14.5556	0.525346	0.545143	20.0401	21.4	0.633335	0.748367	20.0401	18.5193	0.612903	0.670989
20.2159	12.1994	0.504387	0.370862	20.2159	12.3834	0.595856	0.657	20.2159	8.3785	0.479168	0.311597	20.2159	13.8117	0.529954	0.517282	20.2159	18.463	0.63889	0.645659	20.2159	11.3515	0.61828	0.411286
20.3917	7.747	0.508774	0.235509	20.3917	8.4041	0.601038	0.445879	20.3917	6.0556	0.483335	0.225208	20.3917	10.6116	0.534563	0.397431	20.3917	18.4844	0.644446	0.646407	20.3917	12.1805	0.623657	0.441322
20.5674	13.964	0.513157	0.424506	20.5674	4.9189	0.606216	0.260972	20.5674	8.0156	0.487499	0.298101	20.5674	11.1633	0.539169	0.418093	20.5674	18.42	0.649999	0.644155	20.5674	11.2206	0.62903	0.406543
20.7432	11.506	0.517544	0.349783	20.7432	4.3364	0.611398	0.230067	20.7432	7.2431	0.491666	0.269371	20.7432	15.1251	0.543777	0.566473	20.7432	14.6672	0.655555	0.512918	20.7432	13.1614	0.634407	0.476862
20.919	7.7507	0.52193	0.235622	20.919	4.259	0.616579	0.225961	20.919	6.6719	0.495833	0.248128	20.919	11.1613	0.548386	0.418018	20.919	14.4415	0.661111	0.505025	20.919	14.5346	0.639783	0.526616
21.0948	9.5152	0.526316	0.289262	21.0948	7.5866	0.621761	0.402506	21.0948	9	0.5	0.334711	21.0948	8.0816	0.552994	0.302676	21.0948	15.4444	0.666667	0.540097	21.0948	17.6067	0.64516	0.637924
21.2706	8.048	0.530702	0.244659	21.2706	7.6529	0.626943	0.406024	21.2706	12.2101	0.504167	0.454094	21.2706	7.052	0.557603	0.264115	21.2706	13.1005	0.672223	0.45813	21.2706	12.7569	0.650537	0.462207
21.4464	8.6436	0.535088	0.262766	21.4464	14.4617	0.632124	0.767264	21.4464	11.125	0.508334	0.413739	21.4464	8.6991	0.562211	0.325803	21.4464	14.6864	0.677778	0.51359	21.4464	11.8907	0.655913	0.430822
21.6222	8.1136	0.539475	0.246654	21.6222	11.3027	0.637306	0.599664	21.6222	19.0156	0.512501	0.707191	21.6222	8.8203	0.56682	0.330342	21.6222	16.6133	0.683334	0.580974	21.6222	15.7159	0.66129	0.569417
21.798	3.8144	0.543861	0.115958	21.798	12.3961	0.642488	0.657674	21.798	16.8056	0.516668	0.625001	21.798	9.0816	0.571429	0.340128	21.798	17.4444	0.68889	0.610038	21.798	14.7778	0.666667	0.535428
21.9738	5.7581	0.548247	0.175046	21.9738	9.5573	0.647669	0.507062	21.9738	15.3681	0.520835	0.571541	21.9738	9.7097	0.576037	0.363652	21.9738	15.7593	0.694446	0.551109	21.9738	15.0612	0.672043	0.545696
22.1496	6.9307	0.552633	0.210694	22.1496	10.7032	0.652851	0.567857	22.1496	19.1875	0.525001	0.713584	22.1496	10.6452	0.580646	0.398689	22.1496	18.68	0.700002	0.653247	22.1496	17.1582	0.67742	0.621674
22.3253	6.7793	0.557017	0.206091	22.3253	13.0816	0.65803	0.694043	22.3253	18.6806	0.529166	0.694733	22.3253	11.3351	0.585252	0.424528	22.3253	15.4032	0.705555	0.538656	22.3253	16.5291	0.682794	0.59888
22.5011	5.7424	0.561403	0.174569	22.5011	13.6208	0.663211	0.72265	22.5011	14.5556	0.533333	0.541324	22.5011	6.316	0.58986	0.23655	22.5011	13.559	0.71111	0.474164	22.5011	9.723	0.68817	0.352283
22.6769	8.7867	0.56579	0.267116	22.6769	17.3316	0.668393	0.919526	22.6769	12.9062	0.5375	0.479982	22.6769	14.3035	0.594469	0.535702	22.6769	18.0378	0.716666	0.630789	22.6769	7.2695	0.693547	0.263388
22.8527	7.8458	0.570176	0.238513	22.8527	12.7193	0.673575	0.674821	22.8527	16.9653	0.541667	0.630941	22.8527	13.8966	0.599077	0.520462	22.8527	23.5062	0.722222	0.822022	22.8527	16.3988	0.698923	0.594159
23.0285	7.193	0.574562	0.218667	23.0285	16.8647	0.678756	0.894755	23.0285	14.8802	0.545834	0.553396	23.0285	14.3713	0.603686	0.538241	23.0285	17.3111	0.727778	0.605376	23.0285	17.5465	0.7043	0.635743
23.2043	9.9474	0.578948	0.302401	23.2043	10.4222	0.683938	0.552949	23.2043	11.5	0.55	0.427686	23.2043	13.1646	0.608294	0.493047	23.2043	17.6133	0.733334	0.615944	23.2043	15.0364	0.709677	0.544797
23.3801	14.3333	0.583334	0.435733	23.3801	6.3074	0.689119	0.334638	23.3801	17.9774	0.554167	0.668581	23.3801	11.1935	0.612903	0.419224	23.3801	14.7096	0.73889	0.514401	23.3801	13.35	0.715053	0.483696
23.5559	15.0683	0.587721	0.458077	23.5559	5.0844	0.694301	0.269752	23.5559	16.8125	0.558334	0.625258	23.5559	15.549	0.617511	0.582349	23.5559	9.8602	0.744446	0.344815	23.5559	16.5149	0.72043	0.598366
23.7317	15.1939	0.592107	0.461895	23.7317	5.3828	0.699483	0.285584	23.7317	9.8281	0.562501	0.365508	23.7317	19.9638	0.62212	0.747694	23.7317	16.5	0.750002	0.577012	23.7317	16.5349	0.725807	0.599091
23.9075	17.1025	0.596493	0.519917	23.9075	12.2721	0.704664	0.651095	23.9075	6.6667	0.566668	0.247935	23.9075	14.2969	0.626729	0.535454	23.9075	11.9931	0.755557	0.419404	23.9075	20.7676	0.731183	0.752449
24.0832	16.3186	0.600877	0.496086	24.0832	12.3131	0.709843	0.65327	24.0832	3.8281	0.570833	0.142367	24.0832	12.2192	0.631334	0.457639	24.0832	13.4417	0.76111	0.470062	24.0832	18.3467	0.736557	0.664736
24.259	16.8643	0.605263	0.512675	24.259	11.5206	0.715025	0.611224	24.259	4.25	0.575	0.158058	24.259	13.1494	0.635943	0.492478	24.259	19.3733	0.766666	0.677492	24.259	17.4058	0.741934	0.630645
24.4348	17.1237	0.609649	0.520561	24.4348	6.5841	0.720206	0.349319	24.4348	5.8177	0.579166	0.216361	24.4348	9.6004	0.640552	0.359559	24.4348	15.7336	0.772222	0.550211	24.4348	14.7047	0.74731	0.532779
24.6106	20.0923	0.614035	0.610807	24.6106	11.3827	0.725388	0.603908	24.6106	8.25	0.583333	0.306818	24.6106	6.4839	0.64516	0.242838	24.6106	13.1728	0.777778	0.460658	24.6106	17.4905	0.752687	0.633714
24.7864	16.3629	0.618422	0.497433	24.7864	11.9784	0.73057	0.635513	24.7864	7.3438	0.5875	0.273116	24.7864	8.1784	0.649769	0.306301	24.7864	14.8756	0.783334	0.520206	24.7864	25.232	0.758063	0.914203
24.9622	18.7202	0.622808	0.569095	24.9622	9.3156	0.735751	0.494238	24.9622	9.1667	0.591667	0.34091	24.9622	8.2383	0.654377	0.308545	24.9622	23.4257	0.78889	0.819206	24.9622	22.682	0.76344	0.821812
25.138	11.65	0.627194	0.35416	25.138	8.2876	0.740933	0.439698	25.138	8.8194	0.595834	0.327994	25.138	9.2172	0.658986	0.345207	25.138	18.9874	0.794445	0.663997	25.138	17.493	0.768817	0.633804
25.3138	13.9335	0.63158	0.423579	25.3138	11.5701	0.746115	0.613851	25.3138	16	0.600001	0.595041	25.3138	7.187	0.663594	0.269171	25.3138	17.52	0.800001	0.612682	25.3138	15.4121	0.774193	0.558409
25.4896	14.6944	0.635966	0.44671	25.4896	16.3903	0.751296	0.869586	25.4896	11.8264	0.604168	0.439825	25.4896	16.3232	0.668203	0.611344	25.4896	16.858	0.805557	0.589531	25.4896	18.0214	0.77957	0.652949
25.6654	17.4054	0.640353	0.529125	25.6654	12.4967	0.756478	0.663011	25.6654	14.2431	0.608335	0.529702	25.6654	7.6208	0.672811	0.285418	25.6654	15.9363	0.811113	0.557299	25.6654	21.4538	0.784947	0.777312
25.8411	12.3352	0.644736	0.37499	25.8411	4.8929	0.761656	0.259592	25.8411	15.4844	0.612499	0.575866	25.8411	9.6774	0.677417	0.362443	25.8411	15.2289	0.816666	0.532561	25.8411	24.0926	0.79032	0.87292
26.0169	12.9501	0.649123	0.393683	26.0169	8.0923	0.766838	0.429336	26.0169	14.1667	0.616666	0.526861	26.0169	10.1712	0.682026	0.380937	26.0169	20.5521	0.822222	0.718715	26.0169	19.4325	0.795697	0.704076
26.1927	16.109	0.653509	0.489714	26.1927	11.072	0.77202	0.587424	26.1927	15.5868	0.620833	0.579674	26.1927	9.2804	0.686634	0.347574	26.1927	17.7385	0.827777	0.620323	26.1927	13.5132	0.801073	0.489609
26.3685	16.0332	0.657895	0.48741	26.3685	9.6582	0.777201	0.512415	26.3685	9.6875	0.625	0.360279	26.3685	10.6596	0.691243	0.399228	26.3685	18.3333	0.833333	0.641123	26.3685	15.1946	0.80645	0.550529
26.5443	15.4109	0.662281	0.468492	26.5443	10.1878	0.782383	0.540513	26.5443	9.2257	0.629167	0.343104	26.5443	14.1264	0.695852	0.529069	26.5443	21.2877	0.838889	0.74444	26.5443	20.0134	0.811827	0.725123
26.7201	21	0.666667	0.638401	26.7201	7.1528	0.787565	0.379491	26.7201	11.4444	0.633334	0.425618	26.7201	10.9098	0.70046	0.408599	26.7201	18.2978	0.844445	0.639882	26.7201	13.4709	0.817203	0.488076
26.8959	18.8089	0.671054	0.571791	26.8959	7.0931	0.792746	0.376324	26.8959	11.8281	0.637501	0.439888	26.8959	13.6498	0.705069	0.511219	26.8959	18.38	0.850001	0.642756	26.8959	13.076	0.82258	0.473768
27.0717	17.5679	0.67544	0.534065	27.0717	13.4566	0.797928	0.713939	27.0717	9.125	0.641668	0.339359	27.0717	17.3548	0.709677	0.64998	27.0717	20.4696	0.855557	0.71583	27.0717	13.8188	0.827957	0.500681
27.2475	13.5974	0.679826	0.413361	27.2475	16.5184	0.80311	0.876382	27.2475	6.7969	0.645835	0.252777	27.2475	15.4082	0.714286	0.577075	27.2475	19.3086	0.861113	0.67523	27.2475	17.6667	0.833333	0.640098
27.4233	9.6704	0.684212	0.29398	27.4233	16.8152	0.808291	0.892129	27.4233	7.25	0.650001	0.269628	27.4233	12.3009	0.718894	0.460699	27.4233	15.7867	0.866669	0.552067	27.4233	16.2674	0.83871	0.589399
27.599	12.133	0.688596	0.368844	27.599	18.0816	0.81347	0.959318	27.599	8.1198	0.654166	0.301976	27.599	11.2304	0.7235	0.420606	27.599	19.0143	0.872221	0.664938	27.599	17.6039	0.844084	0.637822
27.7748	16.2244	0.692982	0.493222	27.7748	13.9793	0.818652	0.74167	27.7748	6.7847	0.658333	0.252323	27.7748	10.2745	0.728109	0.384806	27.7748	19.1635	0.877777	0.670156	27.7748	17.6518	0.84946	0.639558
27.9506	20.1163	0.697369	0.611536	27.9506	11.2262	0.823833	0.595605	27.9506	6.3594	0.6625	0.236507	27.9506	10.5497	0.732717	0.395112	27.9506	15.5222	0.883333	0.542818	27.9506	17.7856	0.854837	0.644406
28.1264	20.7331	0.701755	0.630287	28.1264	8.9388	0.829015	0.474247	28.1264	6.7778	0.666667	0.252067	28.1264	13.1494	0.737326	0.492478	28.1264	16.4074	0.888889	0.573774	28.1264	18.0783	0.860213	0.655011
28.3022	15.0222	0.706141	0.456675	28.3022	9.4265	0.834196	0.500122	28.3022	4.2726	0.670834	0.158898	28.3022	20.9677	0.741934	0.785292	28.3022	17.3677	0.894445	0.607356	28.3022	24.788	0.86559	0.898116
28.478	15.4875	0.710527	0.470821	28.478	12.5521	0.839378	0.66595	28.478	6.0625	0.675	0.225465	28.478	7.4931	0.746543	0.280635	28.478	19.72	0.900001	0.689617	28.478	21.4755	0.870967	0.778098
28.6538	12.4506	0.714913	0.378499	28.6538	16.5832	0.84456	0.87982	28.6538	13.3333	0.679167	0.495866	28.6538	8.553	0.751151	0.320331	28.6538	16.9664	0.905557	0.593322	28.6538	15.7777	0.876343	0.571656
28.8296	11.0222	0.7193	0.335075	28.8296	14.6318	0.849741	0.776289	28.8296	17.3056	0.683334	0.643596	28.8296	10.9151	0.75576	0.408798	28.8296	16.7709	0.911112	0.586485	28.8296	27.6	0.88172	1
29.0054	9.2078	0.723686	0.279917	29.0054	14.9171	0.854923	0.791425	29.0054	10.5312	0.687501	0.391656	29.0054	11.6155	0.760369	0.435029	29.0054	18.8889	0.916668	0.660553	29.0054	24.9781	0.887097	0.905004
29.1812	11.144	0.728072	0.338778	29.1812	13.9919	0.860105	0.742339	29.1812	16.1736	0.691668	0.601497	29.1812	13.6695	0.764977	0.511957	29.1812	16.3422	0.922224	0.571494	29.1812	14.2226	0.892473	0.515312
29.3569	11.2632	0.732456	0.342402	29.3569	18.7822	0.865283	0.996488	29.3569	9.3924	0.695833	0.349304	29.3569	9.3114	0.769583	0.348735	29.3569	20.142	0.927777	0.704374	29.3569	17.7718	0.897847	0.643906
29.5327	9.626	0.736842	0.292631	29.5327	16.3969	0.870465	0.869936	29.5327	9	0.7	0.334711	29.5327	8.6129	0.774192	0.322574	29.5327	13.0222	0.933333	0.455392	29.5327	18.7107	0.903224	0.677924
29.7085	7.6445	0.741228	0.232393	29.7085	18.4666	0.875647	0.979744	29.7085	14.7639	0.704166	0.54907	29.7085	10.1639	0.7788	0.380663	29.7085	14.6494	0.938889	0.512296	29.7085	19.1925	0.9086	0.69538
29.8843	9.8652	0.745614	0.299902	29.8843	11.0706	0.880828	0.58735	29.8843	11.4722	0.708333	0.426652	29.8843	13.9546	0.783409	0.522634	29.8843	13.5185	0.944444	0.472748	29.8843	21.1735	0.913977	0.767156
30.0601	18	0.750001	0.547201	30.0601	15.7393	0.88601	0.835047	30.0601	17.7188	0.7125	0.658963	30.0601	15.2739	0.788017	0.572045	30.0601	13.2	0.95	0.461609	30.0601	15.0864	0.919353	0.546609
30.2359	15.614	0.754387	0.474666	30.2359	13.8378	0.891192	0.734163	30.2359	15.0833	0.716667	0.560949	30.2359	25.0777	0.792626	0.939222	30.2359	24.9946	0.955556	0.874072	30.2359	14.7236	0.92473	0.533464
30.4117	17.1644	0.758773	0.521798	30.4117	11.226	0.896373	0.595594	30.4117	16.3646	0.720834	0.608601	30.4117	12.6853	0.797234	0.475096	30.4117	17.2358	0.961112	0.602743	30.4117	18.3709	0.930107	0.665612
30.5875	19.5734	0.763159	0.595032	30.5875	13.5809	0.901555	0.720533	30.5875	12	0.725001	0.446281	30.5875	12.9974	0.801843	0.486785	30.5875	19.9422	0.966668	0.697387	30.5875	19.9813	0.935483	0.72396
30.7633	15.892	0.767545	0.483117	30.7633	13.7875	0.906736	0.731494	30.7633	11.5052	0.729168	0.427879	30.7633	13.7419	0.806451	0.514668	30.7633	19.142	0.972224	0.669404	30.7633	21.8906	0.94086	0.793138
30.9391	17.4728	0.771932	0.531174	30.9391	10.519	0.911918	0.558085	30.9391	15	0.733335	0.557851	30.9391	13.7749	0.81106	0.515904	30.9391	13.1837	0.97778	0.461039	30.9391	19.9466	0.946237	0.722703
31.1148	13.831	0.776315	0.420463	31.1148	15.5721	0.917097	0.826176	31.1148	12.375	0.737499	0.460227	31.1148	15.1955	0.815666	0.569109	31.1148	14.7778	0.983332	0.516786	31.1148	20.8939	0.95161	0.757025
31.2906	14.1071	0.780702	0.428856	31.2906	9.9685	0.922278	0.528878	31.2906	16.4028	0.741666	0.610021	31.2906	14.5872	0.820274	0.546327	31.2906	19.4647	0.988888	0.680689	31.2906	19.7656	0.956987	0.716145
31.4664	13.795	0.785088	0.419368	31.4664	9.3156	0.92746	0.494238	31.4664	18.7743	0.745833	0.698217	31.4664	9.7762	0.824883	0.366143	31.4664	12.301	0.994444	0.430171	31.4664	19.9761	0.962364	0.723772
31.6422	17.5706	0.789474	0.534147	31.6422	13.3368	0.932642	0.707583	31.6422	22.5	0.75	0.836777	31.6422	14.2047	0.829492	0.532001	31.6422	12	1	0.419645	31.6422	18.4464	0.96774	0.668348
31.818	19.2641	0.79386	0.585629	31.818	11.485	0.937823	0.609336	31.818	21.5712	0.754167	0.802234	31.818	17.9328	0.8341	0.671628					31.818	14.0326	0.973117	0.508428
31.9938	25.8929	0.798247	0.787145	31.9938	10.9258	0.943005	0.579667	31.9938	21.0278	0.758334	0.782025	31.9938	17.5484	0.838709	0.657231					31.9938	16.2518	0.978493	0.588833
32.1696	25.4321	0.802633	0.773137	32.1696	14.4485	0.948187	0.766564	32.1696	16.7969	0.762501	0.624678	32.1696	12.3147	0.843317	0.461216					32.1696	19.8106	0.98387	0.717775
32.3454	20.9409	0.807019	0.636604	32.3454	9.8679	0.953368	0.52354	32.3454	13.1111	0.766668	0.487603	32.3454	14.8025	0.847926	0.55439					32.3454	21.7282	0.989247	0.787254
32.5212	13.59	0.811405	0.413136	32.5212	13.6456	0.95855	0.723966	32.5212	13.2153	0.770835	0.491478	32.5212	15.8585	0.852534	0.59394					32.5212	15.8587	0.994623	0.574591
32.697	14.2576	0.815791	0.433432	32.697	10.1006	0.963731	0.535886	32.697	10.375	0.775001	0.385847	32.697	15.2041	0.857143	0.569431					32.697	16	1	0.57971
32.8727	20.8513	0.820175	0.63388	32.8727	12.7841	0.96891	0.678259	32.8727	11.8958	0.779166	0.442406	32.8727	15.0968	0.861749	0.565413
33.0485	22.5956	0.824561	0.686907	33.0485	10.1442	0.974092	0.5382	33.0485	15.8056	0.783333	0.587811	33.0485	16.9355	0.866357	0.634277
33.2243	26.4266	0.828948	0.80337	33.2243	10.5239	0.979273	0.558344	33.2243	11.9688	0.7875	0.44512	33.2243	14.0968	0.870966	0.52796
33.4001	22	0.833334	0.668801	33.4001	11.3873	0.984455	0.604152	33.4001	10.1944	0.791667	0.37913	33.4001	12.023	0.875574	0.450291
33.5759	20.5734	0.83772	0.625432	33.5759	5.8398	0.989637	0.30983	33.5759	21.1667	0.795834	0.787191	33.5759	11.0237	0.880183	0.412865
33.7517	18.4155	0.842106	0.559832	33.7517	7.6458	0.994818	0.405647	33.7517	19	0.8	0.706611	33.7517	12.5833	0.884792	0.471276
33.9275	21.1459	0.846492	0.642836	33.9275	16	1	0.848878	33.9275	18.3837	0.804167	0.683691	33.9275	10.1619	0.8894	0.380588
34.1033	15.0129	0.850879	0.456393					34.1033	12.6597	0.808334	0.470815	34.1033	9.314	0.894009	0.348832
34.2791	14.0471	0.855265	0.427032					34.2791	12	0.812501	0.446281	34.2791	7.4812	0.898617	0.28019
34.4549	19.5263	0.859651	0.5936					34.4549	17.7778	0.816668	0.661158	34.4549	14.9677	0.903226	0.560578
34.6306	19.2059	0.864035	0.58386					34.6306	17.4583	0.820833	0.649275	34.6306	12.8387	0.907832	0.480841
34.8064	22.3019	0.868421	0.677979					34.8064	21.375	0.825	0.794938	34.8064	10.3443	0.91244	0.38742
34.9822	17.7969	0.872807	0.541026					34.9822	25.0243	0.829166	0.930655	34.9822	9.9592	0.917049	0.372997
35.158	12.9021	0.877193	0.392224					35.158	26.8889	0.833333	1	35.158	8.237	0.921657	0.308496
35.3338	10.1136	0.88158	0.307454					35.3338	23.6094	0.8375	0.878035	35.3338	16.2528	0.926266	0.608708
35.5096	18.3149	0.885966	0.556774					35.5096	21.5417	0.841667	0.801137	35.5096	13.2791	0.930874	0.497335
35.6854	18.1727	0.890352	0.552451					35.6854	20.7726	0.845834	0.772534	35.6854	10.871	0.935483	0.407146
35.8612	12.4155	0.894738	0.377432					35.8612	22	0.850001	0.818181	35.8612	14.6313	0.940091	0.547979
36.037	11.4007	0.899125	0.346582					36.037	16.5122	0.854168	0.61409	36.037	15.9289	0.9447	0.596577
36.2128	16.8329	0.903511	0.511721					36.2128	7.3125	0.858335	0.271952	36.2128	7.3746	0.949309	0.276197
36.3886	17.241	0.907897	0.524127					36.3886	16.7656	0.862502	0.623514	36.3886	7.1718	0.953917	0.268602
36.5643	16.59	0.912281	0.504337					36.5643	22.6667	0.866666	0.842976	36.5643	12.075	0.958523	0.452239
36.7401	15.3333	0.916667	0.466133					36.7401	16.3142	0.870833	0.606726	36.7401	13.0086	0.963132	0.487204
36.9159	19.9972	0.921053	0.607916					36.9159	18.9375	0.875	0.704287	36.9159	11.9355	0.96774	0.447014
37.0917	20.8523	0.925439	0.633911					37.0917	24.7344	0.879167	0.919874	37.0917	8.8124	0.972349	0.330046
37.2675	26.7535	0.929826	0.813307					37.2675	20.5	0.883334	0.762396	37.2675	5.3371	0.976957	0.199888
37.4433	8.8421	0.934212	0.2688					37.4433	13.5	0.887501	0.502066	37.4433	9.5227	0.981566	0.356649
37.6191	20.386	0.938598	0.619735					37.6191	8.8264	0.891668	0.328254	37.6191	7.4062	0.986174	0.277381
37.7949	17.2705	0.942984	0.525024					37.7949	18.0955	0.895835	0.672973	37.7949	5.2232	0.990783	0.195622
37.9707	19.6621	0.94737	0.597729					37.9707	21	0.900001	0.780991	37.9707	5.2666	0.995391	0.197247
38.1465	24.6223	0.951757	0.748519					38.1465	20.6458	0.904168	0.767819	38.1465	2	1	0.074905
38.3222	18.9723	0.95614	0.576759					38.3222	18.625	0.908333	0.692665
38.498	19.7479	0.960527	0.600337					38.498	24.0156	0.9125	0.893142
38.6738	21.651	0.964913	0.658191					38.6738	17.1389	0.916667	0.637397
38.8496	18.7645	0.969299	0.570441					38.8496	23.0087	0.920834	0.855695
39.0254	19.2133	0.973685	0.584085					39.0254	21.25	0.925	0.790289
39.2012	24.9511	0.978071	0.758514					39.2012	18.026	0.929167	0.670388
39.377	22.1533	0.982458	0.673461					39.377	13.7778	0.933334	0.512397
39.5528	21.6565	0.986844	0.658358					39.5528	19.375	0.937501	0.720558
39.7286	20.0831	0.99123	0.610527					39.7286	17.2569	0.941668	0.641785
39.9044	27.2992	0.995616	0.829897					39.9044	13.4826	0.945835	0.501419
40.0801	14	1	0.4256					40.0801	15.75	0.95	0.585744
								40.2559	17.3889	0.954166	0.646694
								40.4317	18.9306	0.958333	0.70403
								40.6075	20.9844	0.9625	0.780411
								40.7833	17.7778	0.966667	0.661158
								40.9591	16.7969	0.970834	0.624678
								41.1349	14.0625	0.975001	0.522985
								41.3107	12.4757	0.979168	0.463972
								41.4865	15.0278	0.983335	0.558885
								41.6623	11.6094	0.987502	0.431754
								41.838	9.6319	0.991666	0.358211
								42.0138	10.6684	0.995833	0.396759
								42.1896	11	1	0.409091

## Sheet: 5-6 hpf
X	Y			X	Y			X	Y			X	Y			X	Y			X	Y			X	Y			X	Y			X	Y			X	Y			X	Y
0	16.8889	0	0.458608	0	19	0	0.648887	0	37	0	0.990128	0	20	0	0.745562	0	24.2222	0	0.815554	0	19	0	0.605775	0	65.2222	0	0.73001	0	59	0	0.760649	0	28.5556	0	0.668138	0	29	0	0.800097	0	18	0	0.56638
0.12132	24.3232	0.0149258	0.660483	0.12132	18.253	0.0188685	0.623376	0.12586	29.4344	0.0166672	0.787671	0.12586	24.6378	0.0238103	0.91845	0.17579	26.2274	0.0232558	0.883069	0.17579	23.3639	0.0217391	0.744908	0.12586	57.8	0.0285724	0.646936	0.12586	62.526	0.0181824	0.806108	0.15309	29.9458	0.0217388	0.700665	0.15309	31.5225	0.0169489	0.869692	0.15309	28.4516	0.0169489	0.895245
0.24263	21.7634	0.0298504	0.590973	0.24263	17.6901	0.0377355	0.604152	0.25171	29.2022	0.0333331	0.781457	0.25171	16.7211	0.0476188	0.623331	0.35158	24.9147	0.0465116	0.83887	0.35158	26.8185	0.0434783	0.855051	0.25171	70.3371	0.0571425	0.78726	0.25171	63.1428	0.0363634	0.81406	0.30619	26.5763	0.0434789	0.621826	0.30619	32.946	0.0338988	0.908966	0.30619	21.2048	0.0338988	0.66722
0.36395	30.8619	0.0447763	0.838037	0.36395	22.0418	0.056604	0.752771	0.37757	31.56	0.0500003	0.844553	0.37757	19.0765	0.0714291	0.711136	0.52737	24.1189	0.0697674	0.812076	0.52737	20.5246	0.0652174	0.654383	0.37757	88.899	0.0857149	0.995017	0.37757	60.924	0.0545458	0.785454	0.45928	25.7496	0.0652177	0.602483	0.45928	30.0436	0.0508477	0.82889	0.45928	17.9497	0.0508477	0.564797
0.48527	29.4305	0.0597021	0.799169	0.48527	24.0841	0.0754725	0.822519	0.50342	25.3956	0.0666662	0.679592	0.50342	26.8254	0.0952376	1	0.70316	26.5426	0.0930233	0.893681	0.70316	22.535	0.0869565	0.718481	0.50342	81.586	0.114285	0.913165	0.50342	57.6959	0.0727268	0.743836	0.61237	32.1739	0.0869565	0.752798	0.61237	25.109	0.0677965	0.692746	0.61237	21.6418	0.0677965	0.680971
0.60658	36.5387	0.0746267	0.992188	0.60658	24.6799	0.0943394	0.842867	0.62928	24.8611	0.0833334	0.665289	0.62928	17.6678	0.119048	0.658622	0.87895	28.2093	0.116279	0.949798	0.87895	25.259	0.108696	0.80533	0.62928	83.2041	0.142857	0.931276	0.62928	60.9422	0.0909092	0.785689	0.76546	42.7391	0.108695	1	0.76546	26.4908	0.0847454	0.730869	0.76546	24.8704	0.0847454	0.782561
0.7279	33.9912	0.0895525	0.923012	0.7279	16.6154	0.113208	0.567448	0.75513	26.34	0.0999993	0.704864	0.75513	16.2245	0.142856	0.604819	1.05474	24.4057	0.139535	0.821732	1.05474	26.4764	0.130435	0.844144	0.75513	76.114	0.171428	0.851919	0.75513	55.4797	0.10909	0.715264	0.91856	41.2592	0.130435	0.965374	0.91856	22.4864	0.101695	0.62039	0.91856	21.0362	0.101695	0.661915
0.84921	36.8264	0.104477	1	0.84921	19.745	0.132075	0.67433	0.88099	27.5122	0.116667	0.736233	0.88099	9.8056	0.166667	0.365534	1.23053	21.7959	0.162791	0.733861	1.23053	23.1701	0.152174	0.738729	0.88099	69.7867	0.2	0.781099	0.88099	60.7779	0.127273	0.783571	1.07165	35.7662	0.152174	0.83685	1.07165	27.6951	0.118644	0.764096	1.07165	15.9899	0.118644	0.503131
0.97053	30.2023	0.119403	0.820126	0.97053	10.174	0.150943	0.347462	1.00685	27.8933	0.133334	0.746431	1.00685	10.8639	0.190477	0.404986	1.40632	20.6589	0.186047	0.695579	1.40632	21.7164	0.173913	0.692381	1.00685	76.4792	0.228572	0.856006	1.00685	50.9332	0.145455	0.656649	1.22474	32.4623	0.173913	0.759546	1.22474	31.8574	0.135593	0.878932	1.22474	16.7627	0.135593	0.527447
1.09185	28.1052	0.134329	0.763181	1.09185	7.4514	0.169812	0.25448	1.1327	26.98	0.15	0.721991	1.1327	10.5204	0.214285	0.392181	1.58211	23.9793	0.209302	0.807376	1.58211	18.5737	0.195652	0.592183	1.1327	74.1939	0.257143	0.830428	1.1327	45.96	0.163636	0.592533	1.37783	25.2111	0.195652	0.589884	1.37783	27.4363	0.152542	0.756955	1.37783	25.4809	0.152542	0.80177
1.21316	28.0645	0.149253	0.762076	1.21316	14.4147	0.188679	0.49229	1.25856	25.2778	0.166667	0.676439	1.25856	14.3537	0.238096	0.535079	1.7579	24.1137	0.232558	0.811901	1.7579	17.7183	0.217391	0.56491	1.25856	76.6054	0.285715	0.857419	1.25856	48.5868	0.181818	0.626399	1.53093	19.971	0.217392	0.467277	1.53093	23.3809	0.169492	0.645069	1.53093	25.9055	0.169492	0.815131
1.33448	28.3782	0.164179	0.770594	1.33448	14.0448	0.207547	0.479657	1.38441	21.9022	0.183333	0.586108	1.38441	17.4615	0.261904	0.650932	1.93369	22.9147	0.255814	0.771531	1.93369	20.0378	0.23913	0.638863	1.38441	73.0033	0.314285	0.817102	1.38441	57.76	0.199999	0.744663	1.68402	23.6265	0.239131	0.552808	1.68402	27.4386	0.186441	0.757019	1.68402	25.0879	0.186441	0.789404
1.4558	34.2135	0.179105	0.929048	1.4558	14.9631	0.226416	0.511019	1.51027	20.68	0.2	0.553401	1.51027	14.8163	0.285715	0.552324	2.10948	23.907	0.27907	0.804941	2.10948	18.3043	0.26087	0.583594	1.51027	53.8515	0.342857	0.602742	1.51027	59.5484	0.218182	0.76772	1.83711	24.0153	0.260869	0.561905	1.83711	26.2324	0.20339	0.72374	1.83711	19.4111	0.20339	0.610781
1.57711	33.9765	0.19403	0.922613	1.57711	14.9917	0.245283	0.511996	1.63613	28.8333	0.216667	0.771585	1.63613	16.1536	0.309525	0.602176	2.28527	21.3152	0.302326	0.717676	2.28527	16.5369	0.282609	0.527244	1.63613	64.5862	0.37143	0.722892	1.63613	71.0397	0.236364	0.91587	1.9902	30.2394	0.282608	0.707535	1.9902	21.0201	0.220338	0.579935	1.9902	27.9078	0.220338	0.878134
1.69843	32.2999	0.208955	0.877085	1.69843	15.8428	0.264151	0.541063	1.76198	30.0711	0.233333	0.804709	1.76198	15.3333	0.333333	0.571596	2.46106	21.9767	0.325581	0.739949	2.46106	20.0529	0.304348	0.639344	1.76198	70.28	0.4	0.786621	1.76198	66.0122	0.254545	0.851053	2.1433	38.3684	0.304348	0.897735	2.1433	19.9406	0.237288	0.550152	2.1433	20.6791	0.237288	0.650679
1.81974	26.1994	0.22388	0.71143	1.81974	18.3384	0.283018	0.626292	1.88784	22.25	0.25	0.595415	1.88784	14.4898	0.357144	0.540152	2.63685	23.2326	0.348837	0.782235	2.63685	22.5794	0.326087	0.719896	1.88784	70.3447	0.428572	0.787345	1.88784	50.6942	0.272728	0.653568	2.29639	33.7916	0.326087	0.790648	2.29639	20.3388	0.254237	0.561138	2.29639	17.0167	0.254237	0.53544
1.94106	25.1874	0.238806	0.68395	1.94106	14.7299	0.301887	0.503055	2.01369	19.3733	0.266666	0.518434	2.01369	14.6871	0.380952	0.547507	2.81264	22.6951	0.372093	0.764137	2.81264	26.2798	0.347826	0.837876	2.01369	71.9468	0.457143	0.805277	2.01369	53.9365	0.290909	0.695369	2.44948	31.7076	0.347826	0.741887	2.44948	19.5802	0.271186	0.540209	2.44948	12.5079	0.271186	0.393568
2.06238	29.8804	0.253732	0.811385	2.06238	21.6379	0.320755	0.738977	2.13955	26.2944	0.283333	0.703644	2.13955	17.542	0.404762	0.653932	2.98843	23.3566	0.395349	0.78641	2.98843	29.5699	0.369565	0.942773	2.13955	68.4604	0.485715	0.766255	2.13955	69.8466	0.309091	0.900488	2.60258	33.0145	0.369566	0.772466	2.60258	17.7499	0.288136	0.489712	2.60258	11.8138	0.288136	0.371728
2.18369	29.2319	0.268656	0.793776	2.18369	17.4763	0.339622	0.59685	2.2654	23.82	0.299999	0.637428	2.2654	13.7347	0.428571	0.512004	3.16422	24.0181	0.418605	0.808682	3.16422	31.3648	0.391304	1	2.2654	67.3351	0.514285	0.753659	2.2654	75.9402	0.327272	0.979049	2.75567	40.791	0.391305	0.954419	2.75567	19.9697	0.305085	0.550955	2.75567	12.3729	0.305085	0.38932
2.30501	26.7614	0.283582	0.726691	2.30501	19.9097	0.358491	0.679955	2.39126	20.0356	0.316667	0.536157	2.39126	13.1332	0.452381	0.489581	3.34001	25.5452	0.44186	0.860099	3.34001	19.2391	0.413043	0.613398	2.39126	68.5608	0.542857	0.767378	2.39126	77.5653	0.345454	1	2.90876	42.0428	0.413044	0.983708	2.90876	22.1842	0.322034	0.612052	2.90876	13.7561	0.322034	0.432843
2.42633	25.1235	0.298508	0.682214	2.42633	19.1693	0.377359	0.654669	2.51712	24.1111	0.333334	0.645218	2.51712	16.9388	0.476192	0.631446	3.5158	25.3023	0.465116	0.851921	3.5158	17.552	0.434783	0.559608	2.51712	71.1225	0.57143	0.796051	2.51712	69.2397	0.363637	0.892663	3.06185	40.9223	0.434782	0.957491	3.06185	25.2052	0.338983	0.6954	3.06185	14.6182	0.338983	0.45997
2.54764	26.5343	0.313433	0.720524	2.54764	22.0415	0.396226	0.75276	2.64297	21.97	0.35	0.587922	2.64297	17.25	0.5	0.643047	3.69159	20.9767	0.488372	0.706279	3.69159	20.121	0.456522	0.641515	2.64297	84.4533	0.6	0.945258	2.64297	61.4731	0.381818	0.792534	3.21495	33.6318	0.456522	0.786909	3.21495	30.3822	0.355933	0.838231	3.21495	23.1908	0.355933	0.729711
2.66896	33.4768	0.328358	0.909044	2.66896	24.9049	0.415095	0.850551	2.76883	18.2244	0.366667	0.487689	2.76883	18.5873	0.52381	0.692899	3.86738	20.1499	0.511628	0.678441	3.86738	22.7637	0.478261	0.725772	2.76883	86.4171	0.628572	0.967238	2.76883	57.16	0.4	0.736927	3.36804	23.0302	0.478261	0.538856	3.36804	35.5629	0.372881	0.981165	3.36804	21.6196	0.372881	0.680272
2.79028	29.204	0.343284	0.793018	2.79028	17.928	0.433963	0.612276	2.89468	20.8911	0.383333	0.55905	2.89468	22.4762	0.547619	0.83787	4.04317	22.8217	0.534884	0.7684	4.04317	23	0.5	0.733306	2.89468	82.3722	0.657143	0.921965	2.89468	72.1564	0.418181	0.930266	3.52113	21.2222	0.5	0.496552	3.52113	36.2456	0.38983	1	3.52113	21.584	0.38983	0.679152
2.91159	31.5093	0.358209	0.855617	2.91159	23.659	0.45283	0.808001	3.02054	21.56	0.4	0.57695	3.02054	22.8571	0.571429	0.852069	4.21896	25.2558	0.55814	0.850355	4.21896	18.5028	0.521739	0.589922	3.02054	80.8414	0.685715	0.904831	3.02054	70.8479	0.436364	0.913397	3.67422	19.4545	0.521739	0.455192	3.67422	28.2494	0.406779	0.779388	3.67422	16.4548	0.406779	0.517759
3.03291	29.2517	0.373135	0.794313	3.03291	18.0585	0.471699	0.616733	3.14639	17.5278	0.416666	0.469048	3.14639	21.8367	0.595238	0.814031	4.39475	29.0672	0.581395	0.978684	4.39475	21.2174	0.543478	0.676472	3.14639	76.5034	0.714285	0.856277	3.14639	73.2975	0.454545	0.944978	3.82732	26.477	0.543479	0.619503	3.82732	25.1486	0.423729	0.693839	3.82732	20.0488	0.423729	0.630846
3.15422	33.6666	0.388059	0.914197	3.15422	20.8678	0.490566	0.712676	3.27225	24.9133	0.433333	0.666685	3.27225	19.3991	0.619048	0.723162	4.57054	28.0543	0.604651	0.94458	4.57054	18.1248	0.565217	0.577871	3.27225	61.3747	0.742857	0.686947	3.27225	69.6612	0.472727	0.898097	3.98041	24.6675	0.565218	0.577165	3.98041	25.3409	0.440678	0.699144	3.98041	31.7808	0.440678	1
3.27554	31.738	0.402985	0.861827	3.27554	20.4272	0.509434	0.697629	3.39811	21.19	0.45	0.567049	3.39811	21.2398	0.642858	0.791779	4.74633	23.9044	0.627907	0.804854	4.74633	19.7713	0.586957	0.630366	3.39811	65.4571	0.77143	0.73264	3.39811	75.2909	0.49091	0.970678	4.1335	22.3768	0.586956	0.523567	4.1335	24.5771	0.457627	0.678071	4.1335	30.8776	0.457627	0.97158
3.39686	25.5405	0.417911	0.693538	3.39686	22.1268	0.528303	0.755673	3.52396	23.5467	0.466666	0.630115	3.52396	20	0.666667	0.745562	4.92212	21.801	0.651163	0.734033	4.92212	18.2987	0.608696	0.583415	3.52396	81.3244	0.8	0.910237	3.52396	74.0073	0.50909	0.954129	4.28659	19.2817	0.608695	0.451149	4.28659	18.8975	0.474576	0.521374	4.28659	23.5697	0.474576	0.741633
3.51817	27.6835	0.432836	0.75173	3.51817	24.4137	0.54717	0.833776	3.64982	25.4156	0.483333	0.680127	3.64982	17.0652	0.690477	0.636158	5.09791	19.8915	0.674419	0.669741	5.09791	17.2439	0.630435	0.549785	3.64982	79.0286	0.828572	0.884541	3.64982	72.2972	0.527273	0.932082	4.43969	20.3945	0.630435	0.477186	4.43969	18.56	0.491526	0.512062	4.43969	17.0477	0.491526	0.536415
3.63949	30.6496	0.447761	0.832273	3.63949	22.2526	0.566038	0.75997	3.77567	12.5	0.499999	0.334503	3.77567	12.1837	0.714285	0.454185	5.2737	19.1886	0.697674	0.646074	5.2737	17.138	0.652174	0.546409	3.77567	75.6621	0.857143	0.846861	3.77567	72.124	0.545454	0.929849	4.59278	27.1775	0.652174	0.635893	4.59278	14.0632	0.508474	0.387997	4.59278	20.6995	0.508474	0.651321
3.76081	18.576	0.462687	0.504421	3.76081	24.3372	0.584907	0.831163	3.90153	22.3911	0.516667	0.599191	3.90153	13.0839	0.738096	0.487743	5.44949	17.5788	0.72093	0.591873	5.44949	18.8856	0.673913	0.602127	3.90153	74.6207	0.885715	0.835205	3.90153	70.7207	0.563636	0.911757	4.74587	33.5079	0.673913	0.78401	4.74587	25.9466	0.525423	0.715855	4.74587	25.6024	0.525423	0.805593
3.88212	19.6076	0.477612	0.532433	3.88212	27.0374	0.603774	0.92338	4.02739	21.9556	0.533334	0.587537	4.02739	19.3855	0.761906	0.722655	5.62528	18.876	0.744186	0.635549	5.62528	18.7467	0.695652	0.597699	4.02739	83.6473	0.914287	0.936236	4.02739	47.7507	0.581819	0.615619	4.89897	36.0615	0.695653	0.843759	4.89897	22.4724	0.542373	0.620004	4.89897	29.5691	0.542373	0.930408
4.00344	13.7489	0.492538	0.373344	4.00344	18.2841	0.622642	0.624438	4.15324	14.85	0.55	0.397389	4.15324	20.0816	0.785715	0.748604	5.80107	22.7855	0.767442	0.767181	5.80107	22.5907	0.717391	0.720256	4.15324	89.3442	0.942857	1	4.15324	55.68	0.6	0.717847	5.05206	35.1428	0.717392	0.822263	5.05206	20.3785	0.559322	0.562234	5.05206	27.8753	0.559322	0.877111
4.12475	23.5306	0.507462	0.63896	4.12475	17.5871	0.641509	0.600634	4.2791	16.0844	0.566667	0.430422	4.2791	18.5102	0.809525	0.690025	5.97686	19.8501	0.790698	0.668347	5.97686	21.6125	0.73913	0.689069	4.2791	69.8389	0.97143	0.781684	4.2791	63.1412	0.618182	0.814039	5.20515	42.5224	0.739131	0.99493	5.20515	22.8789	0.576271	0.631219	5.20515	25.3993	0.576271	0.799203
4.24607	17.7951	0.522388	0.483216	4.24607	16.2075	0.660378	0.553518	4.40495	13.1389	0.583333	0.3516	4.40495	17.4722	0.833333	0.65133	6.15265	18.1163	0.813953	0.60997	6.15265	20.9442	0.76087	0.667761	4.40495	59	1	0.660367	4.40495	62.281	0.636363	0.802949	5.35824	31.9565	0.760869	0.747711	5.35824	23.9678	0.59322	0.661261	5.35824	22.5662	0.59322	0.710058
4.36739	26.4787	0.537314	0.719014	4.36739	18.2842	0.679246	0.624441	4.53081	15.76	0.6	0.421741	4.53081	23.8776	0.857144	0.890112	6.32844	24.2093	0.837209	0.81512	6.32844	22.7448	0.782609	0.72517					4.53081	54.9226	0.654546	0.708082	5.51134	21.0481	0.78261	0.492479	5.51134	21.7465	0.61017	0.599976	5.51134	17.0658	0.61017	0.536985
4.4887	31.9012	0.552239	0.866259	4.4887	20.6473	0.698113	0.705146	4.65666	18.0367	0.616666	0.482666	4.65666	19.3793	0.880952	0.722424	6.50423	29.7003	0.860465	1	6.50423	21.0416	0.804348	0.670867					4.65666	63.6479	0.672727	0.820572	5.66443	25.959	0.804348	0.607383	5.66443	19.3832	0.627119	0.534774	5.66443	18.6087	0.627119	0.585533
4.61002	25.4018	0.567164	0.689771	4.61002	19.0676	0.716982	0.651196	4.78252	15.5867	0.633333	0.417104	4.78252	24.8957	0.904762	0.928064	6.68002	28.2946	0.883721	0.952671	6.68002	17.9168	0.826087	0.571239					4.78252	58.3679	0.690909	0.7525	5.81752	26.0298	0.826087	0.609039	5.81752	27.3754	0.644067	0.755275	5.81752	15.9153	0.644067	0.500783
4.73134	23.1171	0.58209	0.627732	4.73134	17.3708	0.73585	0.593247	4.90838	17.78	0.65	0.475797	4.90838	21.3265	0.928573	0.795011	6.85581	28.6382	0.906977	0.964239	6.85581	22.8677	0.847826	0.729088					4.90838	66.565	0.709091	0.85818	5.97061	24.5927	0.847826	0.575415	5.97061	28.5698	0.661016	0.788228	5.97061	11.8279	0.661016	0.372171
4.85265	23.3688	0.597015	0.634567	4.85265	25.7825	0.754717	0.880523	5.03423	20.5556	0.666666	0.550072	5.03423	14.6168	0.952381	0.544887	7.0316	29.3824	0.930233	0.989296	7.0316	15.1947	0.869565	0.484451					5.03423	62.0083	0.727272	0.799434	6.12371	23.8387	0.869566	0.557773	6.12371	20.7649	0.677966	0.572894	6.12371	21.8664	0.677966	0.688038
4.97397	27.5978	0.611941	0.749403	4.97397	22.1296	0.773586	0.755769	5.16009	15.44	0.683333	0.413178	5.16009	15.2659	0.976192	0.569084	7.20739	24.876	0.953488	0.837567	7.20739	17.4839	0.891304	0.557437					5.16009	70.7408	0.745455	0.912016	6.2768	30.2609	0.891305	0.708038	6.2768	14.0395	0.694915	0.387344	6.2768	14.2496	0.694915	0.448371
5.09529	22.7332	0.626866	0.617307	5.09529	23.4672	0.792454	0.801451	5.28594	16.86	0.699999	0.451177	5.28594	17	1	0.633728	7.38318	22.2817	0.976744	0.750218	7.38318	15.5161	0.913043	0.494698					5.28594	67.3048	0.763636	0.867718	6.42989	32.6095	0.913044	0.76299	6.42989	20.1684	0.711864	0.556437	6.42989	11.4068	0.711864	0.358921
5.2166	22.9254	0.641791	0.622526	5.2166	22.3073	0.811321	0.761838	5.4118	21.2978	0.716667	0.569934					7.55897	25.1111	1	0.845483	7.55897	23.6578	0.934783	0.754279					5.4118	65.801	0.781818	0.84833	6.58299	21.7353	0.934784	0.508558	6.58299	25.5219	0.728814	0.704138	6.58299	17.2672	0.728814	0.543322
5.33792	21.7612	0.656717	0.590913	5.33792	29.2809	0.83019	1	5.53765	16.7378	0.733332	0.447907									7.73476	27.1115	0.956522	0.864393					5.53765	66.24	0.799999	0.85399	6.73608	20.4944	0.956522	0.479523	6.73608	20.1908	0.745763	0.557055	6.73608	18.1525	0.745763	0.571178
5.45923	19.2912	0.671642	0.523842	5.45923	21.7348	0.849057	0.742286	5.66351	20.5	0.75	0.548585									7.91055	16.9735	0.978261	0.541164					5.66351	62.7025	0.818182	0.808383	6.88917	22.3587	0.978261	0.523144	6.88917	22.7871	0.762712	0.628686	6.88917	21.5516	0.762712	0.678133
5.58055	20.0059	0.686567	0.543249	5.58055	17.996	0.867925	0.614599	5.78937	20.7978	0.766667	0.556554									8.08634	9	1	0.286946					5.78937	75.882	0.836364	0.978298	7.04226	16	1	0.374364	7.04226	26.4255	0.77966	0.729068	7.04226	23.4464	0.77966	0.737754
5.70187	17.8082	0.701493	0.483572	5.70187	12.0525	0.886794	0.411616	5.91522	21.4856	0.783333	0.574959																	5.91522	75.4949	0.854545	0.973308					7.19536	24.5774	0.79661	0.67808	7.19536	25.2373	0.79661	0.794105
5.82318	24.2756	0.716418	0.65919	5.82318	17.4221	0.905661	0.594999	6.04108	23.2	0.8	0.620837																	6.04108	61.6701	0.872727	0.795073					7.34845	25.794	0.813559	0.711645	7.34845	26.9704	0.813559	0.848638
5.9445	25.7831	0.731344	0.700125	5.9445	19.4104	0.924529	0.662903	6.16693	22.9022	0.816666	0.612868																	6.16693	54.0198	0.890908	0.696443					7.50154	30.8232	0.830508	0.850398	7.50154	27.5613	0.830508	0.867231
6.06582	26.2056	0.746269	0.711598	6.06582	20.837	0.943398	0.711624	6.29279	26.8889	0.833333	0.719553																	6.29279	55.9752	0.909091	0.721653					7.65463	27.3781	0.847457	0.75535	7.65463	24.0147	0.847457	0.755635
6.18713	23.9703	0.761194	0.6509	6.18713	23.5245	0.962265	0.803408	6.41865	26.76	0.85	0.716103																	6.41865	61.8502	0.927273	0.797395					7.80773	26.9432	0.864407	0.743351	7.80773	20.6027	0.864407	0.648275
6.30845	16.8904	0.77612	0.458649	6.30845	14.0864	0.981133	0.481078	6.5445	31.2311	0.866666	0.835751																	6.5445	68.7554	0.945454	0.88642					7.96082	21.0024	0.881356	0.579447	7.96082	24.1839	0.881356	0.760959
6.42976	17.1809	0.791045	0.466538	6.42976	8.2222	1	0.280804	6.67036	37.3689	0.883333	1																	6.67036	67.1577	0.963637	0.865821					8.11391	24.2906	0.898305	0.670167	8.11391	28.5585	0.898305	0.898609
6.55108	28.4533	0.80597	0.772633					6.79621	31.4	0.899999	0.840271																	6.79621	62.1983	0.981818	0.801883					8.267	32.714	0.915254	0.902565	8.267	23.7518	0.915254	0.747363
6.6724	28.0529	0.820896	0.761761					6.92207	26.25	0.916667	0.702456																	6.92207	46	1	0.593049					8.4201	28.4093	0.932203	0.7838	8.4201	26.4628	0.932203	0.832666
6.79371	21.7803	0.835821	0.591432					7.04792	23.1733	0.933332	0.620123																									8.57319	25.1859	0.949152	0.694868	8.57319	28.7822	0.949152	0.905647
6.91503	28.5124	0.850747	0.774238					7.17378	28.41	0.95	0.760258																									8.72628	26.1579	0.966101	0.721685	8.72628	21.9365	0.966101	0.690244
7.03635	35.9269	0.865672	0.975575					7.29964	25.5622	0.966667	0.68405																									8.87938	28.6802	0.983051	0.791274	8.87938	15.0138	0.983051	0.472417
7.15766	23.3449	0.880597	0.633918					7.42549	17.9022	0.983333	0.479067																									9.03247	22.3333	1	0.616166	9.03247	14	1	0.440518
7.27898	19.3443	0.895523	0.525283					7.55135	21	1	0.561965
7.4003	19.7755	0.910449	0.536992
7.52161	24.3037	0.925373	0.659953
7.64293	24.9481	0.940299	0.677452
7.76424	28.0463	0.955224	0.761581
7.88556	30.5313	0.97015	0.82906
8.00688	24.4638	0.985075	0.664301
8.12819	12	1	0.325853

## Sheet: 8-9 hpf
X	Y			X	Y			X	Y			X	Y			X	Y
0	18.6667	0	0.800802	0	16	0	0.926543	0	12	0	0.610414	0	12.3333	0	0.631764	0	14	0	0.63831
0.16671	16.2735	0.0434779	0.698134	0.16671	15.4277	0.0322578	0.893401	0.16671	17.9684	0.0256409	0.914013	0.16671	19.5209	0.0256409	0.999944	0.16671	15.2132	0.0344825	0.693625
0.33342	19.0926	0.0869558	0.819073	0.33342	13.5692	0.0645156	0.785778	0.33342	18.8264	0.0512817	0.957658	0.33342	13.8931	0.0512817	0.711664	0.33342	10.2667	0.0689651	0.468096
0.50013	15.8009	0.130434	0.677859	0.50013	13.2591	0.0967734	0.76782	0.50013	17.3077	0.0769226	0.880405	0.50013	9.4477	0.0769226	0.483951	0.50013	14.1955	0.103448	0.647224
0.66684	13.9735	0.173912	0.599464	0.66684	10.3746	0.129031	0.600782	0.66684	12.2275	0.102563	0.621986	0.66684	12.8177	0.102563	0.656577	0.66684	13.9699	0.13793	0.636938
0.83356	20.5142	0.217392	0.88006	0.83356	10.4422	0.161291	0.604696	0.83356	11.7153	0.128206	0.595932	0.83356	14.6524	0.128206	0.750558	0.83356	11.8415	0.172415	0.539897
1.00027	17.1909	0.26087	0.73749	1.00027	13.1623	0.193549	0.762214	1.00027	15.4734	0.153847	0.787098	1.00027	13.8744	0.153847	0.710706	1.00027	16.0011	0.206897	0.729548
1.16698	21.2187	0.304348	0.910283	1.16698	14.307	0.225807	0.828503	1.16698	19.6588	0.179488	1	1.16698	12.5047	0.179488	0.640544	1.16698	15.3345	0.24138	0.699155
1.33369	20.7259	0.347826	0.889142	1.33369	14.2404	0.258064	0.824646	1.33369	19.2156	0.205128	0.977455	1.33369	12.3568	0.205128	0.632968	1.33369	19.7392	0.275862	0.899981
1.5004	17.4468	0.391304	0.748468	1.5004	10.8668	0.290322	0.629285	1.5004	18.7219	0.230769	0.952342	1.5004	13.1637	0.230769	0.674301	1.5004	21.9329	0.310345	1
1.66711	19.2407	0.434782	0.825427	1.66711	8.3091	0.32258	0.481171	1.66711	17.8074	0.25641	0.905823	1.66711	18.3971	0.25641	0.942378	1.66711	18.7951	0.344828	0.856936
1.83382	20.2325	0.47826	0.867975	1.83382	11.7201	0.354838	0.678698	1.83382	15.9987	0.282051	0.813819	1.83382	16.6943	0.282051	0.855153	1.83382	17.2101	0.37931	0.784671
2.00053	18.3724	0.521738	0.788177	2.00053	9.8866	0.387096	0.572522	2.00053	16.2899	0.307692	0.828631	2.00053	12.0263	0.307692	0.616038	2.00053	16	0.413793	0.729498
2.16724	18.1096	0.565216	0.776903	2.16724	9.7804	0.419354	0.566372	2.16724	18	0.333333	0.91562	2.16724	14.8889	0.333333	0.762673	2.16724	9.8993	0.448275	0.451345
2.33396	20.1569	0.608696	0.864732	2.33396	15.0229	0.451613	0.86996	2.33396	11.9513	0.358975	0.607936	2.33396	16.6724	0.358975	0.854031	2.33396	16.2739	0.48276	0.741986
2.50067	15.528	0.652174	0.666152	2.50067	8.2362	0.483871	0.476949	2.50067	12.6035	0.384616	0.641112	2.50067	18.2222	0.384616	0.933419	2.50067	16.5155	0.517242	0.753001
2.66738	20.1619	0.695652	0.864946	2.66738	7.5609	0.516129	0.437843	2.66738	11.1354	0.410257	0.566433	2.66738	15.8203	0.410257	0.810383	2.66738	14.069	0.551725	0.641456
2.83409	23.31	0.73913	1	2.83409	6.9032	0.548387	0.399757	2.83409	9.403	0.435898	0.47831	2.83409	15.817	0.435898	0.810214	2.83409	15.5957	0.586207	0.711064
3.0008	19.8708	0.782608	0.852458	3.0008	16.8387	0.580645	0.975111	3.0008	12.6627	0.461539	0.644124	3.0008	17.998	0.461539	0.921934	3.0008	14.5733	0.62069	0.664449
3.16751	19.804	0.826086	0.849592	3.16751	17.2685	0.612902	1	3.16751	17.7528	0.48718	0.903046	3.16751	17.2989	0.48718	0.886123	3.16751	12.8296	0.655172	0.584948
3.33422	11.4934	0.869564	0.493067	3.33422	15.9719	0.64516	0.924915	3.33422	10.881	0.51282	0.553493	3.33422	16.0513	0.51282	0.822216	3.33422	18.7337	0.689655	0.854137
3.50093	13.7971	0.913042	0.591896	3.50093	9.3559	0.677418	0.54179	3.50093	15.4083	0.538461	0.783786	3.50093	17.4366	0.538461	0.893177	3.50093	17.8598	0.724138	0.814293
3.66765	18.6938	0.956522	0.801965	3.66765	8.9011	0.709678	0.515453	3.66765	13.6371	0.564104	0.693689	3.66765	16.5115	0.564104	0.845789	3.66765	16.6318	0.758622	0.758304
3.83436	19	1	0.815101	3.83436	10.2914	0.741936	0.595964	3.83436	18.0348	0.589745	0.917391	3.83436	11.2821	0.589745	0.577917	3.83436	13.5018	0.793105	0.615596
				4.00107	16.8106	0.774193	0.973484	4.00107	15.645	0.615385	0.795827	4.00107	12.2965	0.615385	0.629879	4.00107	13.5311	0.827587	0.616932
				4.16778	14.7503	0.806451	0.854174	4.16778	18.526	0.641026	0.942377	4.16778	11.0294	0.641026	0.564973	4.16778	13.9342	0.86207	0.63531
				4.33449	13.4266	0.838709	0.77752	4.33449	12.1111	0.666667	0.616065	4.33449	15.3704	0.666667	0.787337	4.33449	18.0939	0.896552	0.824966
				4.5012	16.4069	0.870967	0.950106	4.5012	10.3728	0.692308	0.527642	4.5012	17.7475	0.692308	0.909103	4.5012	12.2372	0.931035	0.557938
				4.66791	15.0333	0.903225	0.870562	4.66791	13.1012	0.717949	0.666429	4.66791	14.9161	0.717949	0.764066	4.66791	12.7063	0.965517	0.579326
				4.83462	10.3923	0.935482	0.601807	4.83462	15.712	0.74359	0.799235	4.83462	14.9301	0.74359	0.764783	4.83462	15.6667	1	0.714301
				5.00133	9.5973	0.96774	0.555769	5.00133	14.4675	0.769231	0.73593	5.00133	19.522	0.769231	1
				5.16805	15	1	0.868634	5.16805	13.3439	0.794873	0.678775	5.16805	16.645	0.794873	0.852628
								5.33476	12.0513	0.820514	0.613023	5.33476	15.9215	0.820514	0.815567
								5.50147	13.1243	0.846155	0.667604	5.50147	11.2834	0.846155	0.577984
								5.66818	12.5851	0.871796	0.640176	5.66818	15.7204	0.871796	0.805266
								5.83489	9.8192	0.897437	0.499481	5.83489	18.3116	0.897437	0.937998
								6.0016	13.2426	0.923077	0.673622	6.0016	15.5345	0.923077	0.795743
								6.16831	19.6009	0.948718	0.997055	6.16831	12.0254	0.948718	0.615992
								6.33502	15.3077	0.974359	0.778669	6.33502	13.2724	0.974359	0.679869
								6.50173	8	1	0.406942	6.50173	16.6667	1	0.853739
