# Supplementary material for: Par protein localization during the early development of Mnemiopsis leidyi suggests different modes of epithelial organization in the metazoa
Source: eLife. 2020 Jul 27;9:e54927. doi: 10.7554/eLife.54927 (PMC7441587; doi:10.7554/eLife.54927)
Supplement: Figure 4—figure supplement 2—source data 1. [file elife-54927-fig4-figsupp2-data1.xlsx]

## Sheet: Par6 early
X	Y			X	Y			X	Y
0	16	0	0.455778	0	32	0	1	0	10	0	0.425385
0.2757	17.2985	0.00483165	0.492767	0.2757	13.4142	0.00671242	0.419194	0.2757	12.1286	0.00429249	0.515933
0.5513	25.9286	0.00966154	0.738606	0.5513	24.7546	0.0134224	0.773581	0.5513	8.7963	0.00858342	0.374182
0.827	26.8998	0.0144932	0.766271	0.827	15.741	0.0201348	0.491906	0.827	17.569	0.0128759	0.747359
1.1026	22.5932	0.0193231	0.643593	1.1026	13.0583	0.0268448	0.408072	1.1026	11.8751	0.0171668	0.505149
1.3783	25.9433	0.0241547	0.739024	1.3783	13.7628	0.0335572	0.430088	1.3783	14.2505	0.0214593	0.606195
1.654	12.9124	0.0289864	0.367824	1.654	15.869	0.0402697	0.495906	1.654	17.5375	0.0257518	0.746019
1.9296	19.2039	0.0338163	0.547045	1.9296	18.3075	0.0469797	0.572109	1.9296	18.8934	0.0300427	0.803697
2.2053	23.3354	0.0386479	0.664735	2.2053	22.2492	0.0536921	0.695287	2.2053	17.8637	0.0343352	0.759896
2.4809	17.3422	0.0434778	0.494012	2.4809	12.8776	0.0604021	0.402425	2.4809	13.0885	0.0386262	0.556766
2.7566	18.7225	0.0483094	0.533332	2.7566	7.8322	0.0671145	0.244756	2.7566	12.0552	0.0429186	0.51281
3.0322	18.1332	0.0531393	0.516545	3.0322	8.6541	0.0738245	0.270441	3.0322	11.2215	0.0472096	0.477346
3.3079	15.0567	0.057971	0.428907	3.3079	9.1377	0.0805369	0.285553	3.3079	19.7073	0.0515021	0.83832
3.5836	12.661	0.0628026	0.360663	3.5836	12.8147	0.0872493	0.400459	3.5836	11.1553	0.0557945	0.47453
3.8592	15.5856	0.0676325	0.443973	3.8592	14.2835	0.0939593	0.446359	3.8592	6.3596	0.0600855	0.270528
4.1349	13.4373	0.0724642	0.382777	4.1349	7.6023	0.100672	0.237572	4.1349	10.3083	0.064378	0.4385
4.4105	17.0116	0.0772941	0.484595	4.4105	9.4693	0.107382	0.295916	4.4105	13.6438	0.0686689	0.580387
4.6862	21.469	0.0821257	0.611569	4.6862	15.7841	0.114094	0.493253	4.6862	12.6532	0.0729614	0.538249
4.9619	16.7505	0.0869574	0.477157	4.9619	13.6797	0.120807	0.427491	4.9619	13.9152	0.0772539	0.591932
5.2375	20.9803	0.0917873	0.597648	5.2375	16.6415	0.127517	0.520047	5.2375	23.5081	0.0815448	1
5.5132	35.1048	0.0966189	1	5.5132	14.3826	0.134229	0.449456	5.5132	15.3033	0.0858373	0.65098
5.7888	28.988	0.101449	0.825756	5.7888	13.0827	0.140939	0.408834	5.7888	13.6837	0.0901282	0.582084
6.0645	25.7463	0.10628	0.733413	6.0645	22.8626	0.147651	0.714456	6.0645	16.1404	0.0944207	0.686589
6.3401	26.8889	0.11111	0.765961	6.3401	28.2015	0.154361	0.881297	6.3401	15.1341	0.0987116	0.643782
6.6158	19.2722	0.115942	0.54899	6.6158	10.5619	0.161074	0.330059	6.6158	12.3277	0.103004	0.524402
6.8915	16.9588	0.120774	0.483091	6.8915	16.8943	0.167786	0.527947	6.8915	10.4094	0.107297	0.442801
7.1671	12.9704	0.125604	0.369477	7.1671	17.3065	0.174496	0.540828	7.1671	8.9872	0.111588	0.382302
7.4428	17.9319	0.130435	0.51081	7.4428	20.2817	0.181209	0.633803	7.4428	9.7397	0.11588	0.414313
7.7184	16.8733	0.135265	0.480655	7.7184	17.687	0.187919	0.552719	7.7184	13.1603	0.120171	0.55982
7.9941	29.1691	0.140097	0.830915	7.9941	17.1946	0.194631	0.537331	7.9941	13.7958	0.124463	0.586853
8.2698	21.3913	0.144928	0.609355	8.2698	22.0854	0.201343	0.690169	8.2698	7.4949	0.128756	0.318822
8.5454	22.5768	0.149758	0.643126	8.5454	16.9794	0.208053	0.530606	8.5454	4.4133	0.133047	0.187735
8.8211	17.0454	0.15459	0.485558	8.8211	11.6433	0.214766	0.363853	8.8211	9.383	0.137339	0.399139
9.0967	17.9149	0.15942	0.510326	9.0967	17.3052	0.221476	0.540787	9.0967	12.2712	0.14163	0.521999
9.3724	25.9811	0.164251	0.740101	9.3724	22.3418	0.228188	0.698181	9.3724	8.8447	0.145923	0.376241
9.6481	21.4665	0.169083	0.611498	9.6481	18.6124	0.234901	0.581638	9.6481	6.6315	0.150215	0.282094
9.9237	21.2854	0.173913	0.606339	9.9237	16.0209	0.241611	0.500653	9.9237	7.4811	0.154506	0.318235
10.1994	16.0819	0.178745	0.458111	10.1994	10.5385	0.248323	0.329328	10.1994	8.6019	0.158799	0.365912
10.475	24.5885	0.183575	0.700431	10.475	16.2774	0.255033	0.508669	10.475	11.5364	0.16309	0.490741
10.7507	13.3875	0.188406	0.381358	10.7507	12.1735	0.261746	0.380422	10.7507	13.6383	0.167382	0.580153
11.0263	9.7288	0.193236	0.277136	11.0263	14.7701	0.268456	0.461566	11.0263	9.387	0.171673	0.399309
11.302	14.4724	0.198068	0.412263	11.302	17.3826	0.275168	0.543206	11.302	6.9301	0.175965	0.294796
11.5777	14.2691	0.202899	0.406471	11.5777	19.8303	0.28188	0.619697	11.5777	6.9347	0.180258	0.294992
11.8533	12.695	0.207729	0.361631	11.8533	15.6693	0.28859	0.489666	11.8533	5.1659	0.184549	0.21975
12.129	14.5009	0.212561	0.413075	12.129	11.0237	0.295303	0.344491	12.129	5.4183	0.188841	0.230487
12.4046	10.5425	0.217391	0.300315	12.4046	5.9463	0.302013	0.185822	12.4046	8.9237	0.193132	0.379601
12.6803	8	0.222222	0.227889	12.6803	19.1007	0.308725	0.596897	12.6803	13.5091	0.197425	0.574657
12.956	13.0863	0.227054	0.372778	12.956	12.9647	0.315438	0.405147	12.956	12.4782	0.201717	0.530804
13.2316	16.8286	0.231884	0.479382	13.2316	11.4214	0.322148	0.356919	13.2316	13.0792	0.206008	0.55637
13.5073	15.8864	0.236716	0.452542	13.5073	13.3019	0.32886	0.415684	13.5073	13.2519	0.210301	0.563716
13.7829	12.7801	0.241545	0.364056	13.7829	15.0621	0.33557	0.470691	13.7829	11.7645	0.214592	0.500445
14.0586	19.3585	0.246377	0.551449	14.0586	16.7471	0.342282	0.523347	14.0586	11.9432	0.218884	0.508046
14.3343	24.3758	0.251209	0.694372	14.3343	16.5627	0.348995	0.517584	14.3343	10.6864	0.223177	0.454584
14.6099	13.8708	0.256039	0.395125	14.6099	9.2987	0.355705	0.290584	14.6099	7.9724	0.227468	0.339134
14.8856	16.8261	0.26087	0.479311	14.8856	8.5895	0.362417	0.268422	14.8856	9.0363	0.23176	0.384391
15.1612	17.8339	0.2657	0.508019	15.1612	7.9233	0.369127	0.247603	15.1612	15.1084	0.236051	0.642689
15.4369	16.711	0.270532	0.476032	15.4369	11.0398	0.37584	0.344994	15.4369	12.997	0.240343	0.552873
15.7125	14.5161	0.275362	0.413508	15.7125	10.1997	0.38255	0.318741	15.7125	11.579	0.244634	0.492554
15.9882	13.913	0.280193	0.396328	15.9882	10.1222	0.389262	0.316319	15.9882	8.4574	0.248927	0.359765
16.2639	22.754	0.285025	0.648173	16.2639	8.4712	0.395974	0.264725	16.2639	4.2013	0.253219	0.178717
16.5395	23.0725	0.289855	0.657246	16.5395	11.2453	0.402684	0.351416	16.5395	3.7527	0.25751	0.159634
16.8152	13.9038	0.294687	0.396065	16.8152	12.661	0.409397	0.395656	16.8152	7.7412	0.261803	0.329299
17.0908	19.1661	0.299516	0.545968	17.0908	8.1527	0.416107	0.254772	17.0908	8.1868	0.266094	0.348254
17.3665	22.1474	0.304348	0.630894	17.3665	9.0819	0.422819	0.283809	17.3665	9.8979	0.270386	0.421042
17.6422	16.3722	0.30918	0.466381	17.6422	9.391	0.429532	0.293469	17.6422	4.1484	0.274679	0.176467
17.9178	15.1661	0.31401	0.432024	17.9178	12.6429	0.436242	0.395091	17.9178	5.4506	0.27897	0.231861
18.1935	10.9011	0.318841	0.31053	18.1935	13.6928	0.442954	0.4279	18.1935	7.9235	0.283262	0.337054
18.4691	15.5661	0.323671	0.443418	18.4691	18.5407	0.449664	0.579397	18.4691	6.1645	0.287553	0.262229
18.7448	20.2063	0.328503	0.575599	18.7448	6.9723	0.456377	0.217884	18.7448	9.0287	0.291846	0.384068
19.0204	16	0.333333	0.455778	19.0204	8.6227	0.463087	0.269459	19.0204	6.1935	0.296136	0.263462
19.2961	19.2915	0.338164	0.54954	19.2961	9.4362	0.469799	0.294881	19.2961	6.8608	0.300429	0.291848
19.5718	16.6358	0.342996	0.47389	19.5718	11.1394	0.476511	0.348106	19.5718	5.7185	0.304721	0.243257
19.8474	15.9924	0.347826	0.455562	19.8474	12.1697	0.483221	0.380303	19.8474	5.2146	0.309012	0.221821
20.1231	17.5194	0.352658	0.49906	20.1231	9.5592	0.489934	0.298725	20.1231	3.8416	0.313305	0.163416
20.3987	12.2737	0.357487	0.34963	20.3987	10.3279	0.496644	0.322747	20.3987	9.764	0.317596	0.415346
20.6744	12.995	0.362319	0.370177	20.6744	9.1899	0.503356	0.287184	20.6744	11.5832	0.321888	0.492732
20.9501	15.0122	0.367151	0.42764	20.9501	13.4258	0.510069	0.419556	20.9501	5.3473	0.326181	0.227466
21.2257	13.644	0.371981	0.388665	21.2257	15.1093	0.516779	0.472166	21.2257	9.7588	0.330472	0.415125
21.5014	10.8059	0.376812	0.307818	21.5014	15.3146	0.523491	0.478581	21.5014	9.1629	0.334764	0.389776
21.777	10.9261	0.381642	0.311242	21.777	7.8726	0.530201	0.246019	21.777	16.9456	0.339055	0.720841
22.0527	10.7393	0.386474	0.305921	22.0527	14.7675	0.536913	0.461484	22.0527	11.99	0.343348	0.510037
22.3284	7.6862	0.391305	0.21895	22.3284	10.518	0.543626	0.328688	22.3284	9.5979	0.34764	0.408281
22.604	7.0223	0.396135	0.200038	22.604	14.6897	0.550336	0.459053	22.604	6.2466	0.351931	0.265721
22.8797	13.313	0.400967	0.379236	22.8797	13.5854	0.557048	0.424544	22.8797	5.882	0.356223	0.250212
23.1553	12.4946	0.405797	0.355923	23.1553	18.1034	0.563758	0.565731	23.1553	4.4541	0.360514	0.189471
23.431	12.5051	0.410629	0.356222	23.431	20.8069	0.570471	0.650216	23.431	5.2361	0.364807	0.222736
23.7066	16.3951	0.415458	0.467033	23.7066	23.8887	0.577181	0.746522	23.7066	5.1867	0.369098	0.220635
23.9823	14.1405	0.42029	0.402808	23.9823	22.1814	0.583893	0.693169	23.9823	3.588	0.37339	0.152628
24.258	13.1042	0.425122	0.373288	24.258	15.1401	0.590606	0.473128	24.258	7.5267	0.377683	0.320175
24.5336	21.6759	0.429952	0.617463	24.5336	14.9623	0.597316	0.467572	24.5336	6.1419	0.381974	0.261267
24.8093	21.0095	0.434783	0.598479	24.8093	5.6934	0.604028	0.177919	24.8093	5.648	0.386266	0.240258
25.0849	18.9527	0.439613	0.539889	25.0849	14.0845	0.610738	0.440141	25.0849	4.441	0.390557	0.188914
25.3606	17.4444	0.444445	0.496923	25.3606	13.9744	0.61745	0.4367	25.3606	4.0172	0.39485	0.170886
25.6363	11.3226	0.449276	0.322537	25.6363	13.6016	0.624163	0.42505	25.6363	7.6077	0.399142	0.32362
25.9119	16.6818	0.454106	0.4752	25.9119	11.486	0.630873	0.358938	25.9119	7.9255	0.403433	0.337139
26.1876	21.4682	0.458938	0.611546	26.1876	12.4002	0.637585	0.387506	26.1876	8.1373	0.407726	0.346149
26.4632	19.7511	0.463768	0.562632	26.4632	13.7707	0.644295	0.430334	26.4632	8.3486	0.412016	0.355137
26.7389	14.1607	0.4686	0.403384	26.7389	16.3869	0.651008	0.512091	26.7389	6.4073	0.416309	0.272557
27.0145	12.3848	0.473429	0.352795	27.0145	16.3535	0.657718	0.511047	27.0145	3.8019	0.4206	0.161727
27.2902	15.0775	0.478261	0.4295	27.2902	12.6813	0.66443	0.396291	27.2902	6.1771	0.424892	0.262765
27.5659	16.2491	0.483093	0.462874	27.5659	17.691	0.671142	0.552844	27.5659	6.983	0.429185	0.297047
27.8415	16.9658	0.487923	0.48329	27.8415	15.3546	0.677852	0.479831	27.8415	10.1361	0.433476	0.431175
28.1172	13.3226	0.492754	0.379509	28.1172	12.7979	0.684565	0.399934	28.1172	10.295	0.437768	0.437934
28.3928	15.4041	0.497584	0.438803	28.3928	11.7153	0.691275	0.366103	28.3928	9.4606	0.442059	0.40244
28.6685	22.5438	0.502416	0.642186	28.6685	19.7111	0.697987	0.615972	28.6685	10.6217	0.446352	0.451831
28.9442	20.7492	0.507247	0.591064	28.9442	14.7283	0.7047	0.460259	28.9442	7.0428	0.450644	0.29959
29.2198	19.7421	0.512077	0.562376	29.2198	17.2574	0.71141	0.539294	29.2198	4.8498	0.454935	0.206303
29.4955	17.8378	0.516909	0.50813	29.4955	14.8536	0.718122	0.464175	29.4955	5.3192	0.459228	0.226271
29.7711	17.189	0.521739	0.489648	29.7711	9.8278	0.724832	0.307119	29.7711	5.1133	0.463519	0.217512
30.0468	17.1285	0.526571	0.487925	30.0468	10.9019	0.731544	0.340684	30.0468	7.0727	0.467811	0.300862
30.3225	21.1584	0.531402	0.602721	30.3225	16.6381	0.738257	0.519941	30.3225	6.8305	0.472104	0.290559
30.5981	19.2886	0.536232	0.549458	30.5981	17.2285	0.744967	0.538391	30.5981	6.3798	0.476394	0.271387
30.8738	18.1748	0.541064	0.51773	30.8738	12.9468	0.751679	0.404587	30.8738	11.8649	0.480687	0.504715
31.1494	25.3392	0.545894	0.721816	31.1494	11.93	0.758389	0.372812	31.1494	8.9872	0.484978	0.382302
31.4251	15.6749	0.550725	0.446517	31.4251	20.8657	0.765102	0.652053	31.4251	4.1764	0.48927	0.177658
31.7007	8.8889	0.555555	0.25321	31.7007	19.1684	0.771812	0.599012	31.7007	5.3047	0.493561	0.225654
31.9764	14.4659	0.560387	0.412078	31.9764	11.4564	0.778524	0.358013	31.9764	7.6031	0.497854	0.323425
32.2521	24.4159	0.565218	0.695515	32.2521	13.7846	0.785237	0.430769	32.2521	7.8487	0.502146	0.333872
32.5277	25.7444	0.570048	0.733358	32.5277	15.3758	0.791947	0.480494	32.5277	7.1081	0.506437	0.302368
32.8034	21.7309	0.57488	0.619029	32.8034	12.3929	0.798659	0.387278	32.8034	6.6891	0.51073	0.284544
33.079	21.104	0.57971	0.601171	33.079	15.846	0.805369	0.495188	33.079	5.0514	0.515021	0.214879
33.3547	17.9021	0.584542	0.509962	33.3547	18.3289	0.812081	0.572778	33.3547	2.9399	0.519313	0.125059
33.6304	15.0128	0.589373	0.427657	33.6304	15.5832	0.818794	0.486975	33.6304	3.5455	0.523606	0.15082
33.906	12.373	0.594203	0.352459	33.906	13.0249	0.825504	0.407028	33.906	6.3278	0.527896	0.269175
34.1817	11.7606	0.599035	0.335014	34.1817	13.7291	0.832216	0.429034	34.1817	3.7935	0.532189	0.16137
34.4573	10.6402	0.603865	0.303098	34.4573	23.6015	0.838926	0.737547	34.4573	4.8367	0.53648	0.205746
34.733	14.4329	0.608696	0.411138	34.733	15.55	0.845639	0.485938	34.733	5.441	0.540772	0.231452
35.0087	16.6358	0.613528	0.47389	35.0087	20.0703	0.852351	0.627197	35.0087	5.8335	0.545065	0.248149
35.2843	18.3552	0.618358	0.522869	35.2843	24.5818	0.859061	0.768181	35.2843	6.3513	0.549356	0.270175
35.56	15.7398	0.623189	0.448366	35.56	15.6177	0.865773	0.488053	35.56	1.6502	0.553648	0.0701971
35.8356	10.9943	0.628019	0.313185	35.8356	17.5154	0.872483	0.547356	35.8356	5.4378	0.557939	0.231316
36.1113	10.2113	0.632851	0.29088	36.1113	20.1419	0.879196	0.629434	36.1113	5.6686	0.562232	0.241134
36.3869	10.7467	0.637681	0.306132	36.3869	15.3346	0.885906	0.479206	36.3869	4.7895	0.566523	0.203738
36.6626	14.9517	0.642513	0.425916	36.6626	15.3539	0.892618	0.479809	36.6626	9.6082	0.570815	0.408719
36.9383	17.0521	0.647344	0.485748	36.9383	16.3848	0.899331	0.512025	36.9383	8.2832	0.575108	0.352355
37.2139	15.7826	0.652174	0.449585	37.2139	14.4668	0.906041	0.452087	37.2139	9.0738	0.579399	0.385986
37.4896	17.2995	0.657006	0.492796	37.4896	22.8884	0.912753	0.715263	37.4896	7.4233	0.583691	0.315776
37.7652	16.7139	0.661836	0.476114	37.7652	20.3904	0.919463	0.6372	37.7652	5.7289	0.587982	0.243699
38.0409	17	0.666667	0.484264	38.0409	14.6482	0.926176	0.457756	38.0409	7.8384	0.592274	0.333434
38.3166	21.8007	0.671499	0.621018	38.3166	17.6105	0.932888	0.550328	38.3166	13.5694	0.596567	0.577222
38.5922	14.4522	0.676329	0.411687	38.5922	18.4871	0.939598	0.577722	38.5922	12.5391	0.600858	0.533395
38.8679	13.3529	0.68116	0.380372	38.8679	22.0132	0.94631	0.687913	38.8679	11.172	0.60515	0.47524
39.1435	11.9151	0.68599	0.339415	39.1435	28.4972	0.95302	0.890537	39.1435	10.5498	0.609441	0.448773
39.4192	8.8859	0.690822	0.253125	39.4192	26.779	0.959733	0.836844	39.4192	8.7667	0.613734	0.372923
39.6948	12.896	0.695652	0.367357	39.6948	23.0838	0.966443	0.721369	39.6948	6.2706	0.618025	0.266742
39.9705	14.176	0.700484	0.403819	39.9705	23.3351	0.973155	0.729222	39.9705	7.4229	0.622317	0.315759
40.2462	15.2714	0.705315	0.435023	40.2462	24.41	0.979868	0.762813	40.2462	5.7572	0.62661	0.244903
40.5218	10.0095	0.710145	0.285132	40.5218	22.3353	0.986578	0.697978	40.5218	2.5843	0.630901	0.109932
40.7975	15.6957	0.714977	0.44711	40.7975	22.6182	0.99329	0.706819	40.7975	6.2881	0.635193	0.267487
41.0731	15.0181	0.719807	0.427808	41.0731	23	1	0.71875	41.0731	4.9369	0.639484	0.210008
41.3488	11.2369	0.724638	0.320096					41.3488	16.525	0.643777	0.702949
41.6245	14.0977	0.72947	0.401589					41.6245	10.691	0.648069	0.454779
41.9001	17.6597	0.7343	0.503057					41.9001	9.3438	0.65236	0.397472
42.1758	12.6692	0.739131	0.360897					42.1758	7.1116	0.656652	0.302517
42.4514	14.5679	0.743961	0.414983					42.4514	6.3592	0.660943	0.270511
42.7271	15.6497	0.748793	0.445799					42.7271	13.1421	0.665236	0.559046
43.0028	21.1682	0.753625	0.603					43.0028	8.4784	0.669528	0.360659
43.2784	19.2313	0.758455	0.547825					43.2784	4.5104	0.673819	0.191866
43.5541	13.7299	0.763286	0.391112					43.5541	4.932	0.678112	0.2098
43.8297	13.5992	0.768116	0.387389					43.8297	10.2899	0.682403	0.437717
44.1054	10.2323	0.772948	0.291479					44.1054	6.5667	0.686695	0.279338
44.381	7.5556	0.777778	0.21523					44.381	6.2951	0.690986	0.267784
44.6567	11.6295	0.782609	0.331279					44.6567	7.8644	0.695279	0.33454
44.9324	10.4071	0.787441	0.296458					44.9324	9.1256	0.699571	0.38819
45.208	15.7708	0.792271	0.449249					45.208	5.4195	0.703862	0.230538
45.4837	15.2193	0.797102	0.433539					45.4837	6.4354	0.708154	0.273752
45.7593	14.1932	0.801932	0.404309					45.7593	6.7768	0.712445	0.288275
46.035	7.7429	0.806764	0.220565					46.035	13.5541	0.716738	0.576571
46.3107	12.2848	0.811596	0.349946					46.3107	12.1187	0.72103	0.515512
46.5863	12.8292	0.816425	0.365454					46.5863	11.1172	0.725321	0.472909
46.862	14.1151	0.821257	0.402085					46.862	10.7722	0.729614	0.458234
47.1376	9.2287	0.826087	0.26289					47.1376	4.6611	0.733905	0.198276
47.4133	18.1743	0.830919	0.517716					47.4133	9.847	0.738197	0.418877
47.6889	16.9164	0.835749	0.481883					47.6889	7.0038	0.742488	0.297931
47.9646	18.436	0.84058	0.52517					47.9646	9.2511	0.746781	0.393528
48.2403	16.7309	0.845412	0.476599					48.2403	9.726	0.751073	0.41373
48.5159	17.95	0.850242	0.511326					48.5159	7.5857	0.755364	0.322685
48.7916	17.4493	0.855073	0.497063					48.7916	9.5396	0.759657	0.405801
49.0672	13.2642	0.859903	0.377846					49.0672	13.2836	0.763947	0.565065
49.3429	11.1949	0.864735	0.318899					49.3429	10.0951	0.76824	0.429431
49.6186	9.1285	0.869567	0.260036					49.6186	6.4003	0.772532	0.272259
49.8942	7.6675	0.874396	0.218417					49.8942	9.2664	0.776823	0.394179
50.1699	6.4365	0.879228	0.183351					50.1699	7.1963	0.781116	0.30612
50.4455	8.3554	0.884058	0.238013					50.4455	7.4754	0.785407	0.317993
50.7212	11.8889	0.88889	0.338669					50.7212	6.8988	0.789699	0.293465
50.9969	25.5814	0.893721	0.728715					50.9969	10.0129	0.793992	0.425934
51.2725	19.5268	0.898551	0.556243					51.2725	8.7004	0.798283	0.370102
51.5482	12.4724	0.903383	0.35529					51.5482	10.353	0.802575	0.440401
51.8238	14.4033	0.908213	0.410294					51.8238	10.6691	0.806866	0.453848
52.0995	15.6975	0.913044	0.447161					52.0995	9.7823	0.811159	0.416125
52.3751	16.7408	0.917874	0.476881					52.3751	11.3766	0.81545	0.483944
52.6508	16.9895	0.922706	0.483965					52.6508	13.6027	0.819742	0.578639
52.9265	16.2949	0.927538	0.464179					52.9265	10.8322	0.824035	0.460786
53.2021	19.9937	0.932367	0.569543					53.2021	11.0315	0.828325	0.469264
53.4778	21.8263	0.937199	0.621747					53.4778	16.0938	0.832618	0.684607
53.7534	22.8236	0.942029	0.650156					53.7534	14.9128	0.836909	0.634369
54.0291	22.012	0.946861	0.627037					54.0291	8.8914	0.841201	0.378227
54.3048	22.9433	0.951692	0.653566					54.3048	10.2682	0.845494	0.436794
54.5804	20.6011	0.956522	0.586846					54.5804	8.9702	0.849785	0.381579
54.8561	11.6828	0.961354	0.332798					54.8561	8.6051	0.854077	0.366048
55.1317	22.0901	0.966184	0.629262					55.1317	10.3338	0.858368	0.439585
55.4074	11.1096	0.971015	0.31647					55.4074	13.8331	0.862661	0.58844
55.6831	15.7089	0.975847	0.447486					55.6831	10.9324	0.866953	0.465048
55.9587	18.1353	0.980677	0.516605					55.9587	11.6684	0.871244	0.496357
56.2344	27.075	0.985509	0.771262					56.2344	9.0805	0.875537	0.386271
56.51	32.6763	0.990338	0.930821					56.51	10.1154	0.879827	0.430294
56.7857	20.3745	0.99517	0.580391					56.7857	13.7213	0.88412	0.583684
57.0613	17	1	0.484264					57.0613	10.8346	0.888411	0.460888
								57.337	8.1308	0.892703	0.345872
								57.6127	10.2966	0.896996	0.438002
								57.8883	11.8518	0.901287	0.504158
								58.164	15.5646	0.905579	0.662095
								58.4396	13.0765	0.90987	0.556255
								58.7153	5.605	0.914163	0.238428
								58.991	12.2335	0.918455	0.520395
								59.2666	7.8743	0.922746	0.334961
								59.5423	4.1125	0.927039	0.17494
								59.8179	8.4572	0.93133	0.359757
								60.0936	7.1467	0.935622	0.30401
								60.3692	5.2051	0.939913	0.221417
								60.6449	5.1371	0.944205	0.218525
								60.9206	8.0164	0.948498	0.341006
								61.1962	4.0644	0.952789	0.172894
								61.4719	3.9991	0.957081	0.170116
								61.7475	8.3226	0.961372	0.354031
								62.0232	10.1684	0.965665	0.432549
								62.2989	11.8972	0.969957	0.506089
								62.5745	18.7379	0.974248	0.797083
								62.8502	16.6943	0.978541	0.710151
								63.1258	8.1182	0.982832	0.345336
								63.4015	12.195	0.987124	0.518757
								63.6772	14.5273	0.991417	0.61797
								63.9528	9.3825	0.995708	0.399118
								64.2285	16	1	0.680616

## Sheet: Par1 early
X	Y			X	Y			X	Y			X	Y
0	35	0	0.528766	0	24	0	0.525647	0	10	0	0.484764	0	14	0	0.573855
0.5513	14.4242	0.0101007	0.217915	0.2757	12.9221	0.00396885	0.283019	0.2757	9.69	0.00444511	0.469736	0.2757	15.7574	0.00444511	0.64589
1.1026	22.1818	0.0202014	0.335114	0.5513	22.2996	0.00793626	0.488405	0.5513	13.7131	0.00888861	0.664762	0.5513	11.3111	0.00888861	0.463638
1.654	34.0303	0.0303039	0.514116	0.827	22.7438	0.0119051	0.498134	0.827	10.992	0.0133337	0.532852	0.827	13.1796	0.0133337	0.540227
2.2053	36.0808	0.0404046	0.545094	1.1026	19.0917	0.0158725	0.418146	1.1026	3.7872	0.0177772	0.18359	1.1026	16.7468	0.0177772	0.686446
2.7566	32.5455	0.0505053	0.491684	1.3783	25.1839	0.0198414	0.551577	1.3783	5.9511	0.0222223	0.288488	1.3783	14.0222	0.0222223	0.574765
3.3079	24.1212	0.060606	0.364413	1.654	18.7732	0.0238102	0.41117	1.654	6.9915	0.0266674	0.338923	1.654	11.6258	0.0266674	0.476538
3.8592	23.0909	0.0707067	0.348848	1.9296	19.7222	0.0277776	0.431955	1.9296	8.958	0.0311109	0.434251	1.9296	18.3202	0.0311109	0.750939
4.4105	28.3636	0.0808074	0.428506	2.2053	24.6982	0.0317465	0.540939	2.2053	4.7835	0.035556	0.231887	2.2053	18.3498	0.035556	0.752152
4.9619	22.9091	0.0909099	0.346101	2.4809	26.602	0.0357139	0.582636	2.4809	5.2528	0.0399995	0.254637	2.4809	8.096	0.0399995	0.331852
5.5132	32.5657	0.101011	0.491989	2.7566	18.8765	0.0396827	0.413432	2.7566	10.7289	0.0444447	0.520098	2.7566	14.158	0.0444447	0.580332
6.0645	18.3333	0.111111	0.276972	3.0322	20.9599	0.0436501	0.459063	3.0322	14.2272	0.0488882	0.689683	3.0322	16.9885	0.0488882	0.696353
6.6158	27.3333	0.121212	0.41294	3.3079	27.9728	0.047619	0.612659	3.3079	7.2544	0.0533333	0.351667	3.3079	17.4444	0.0533333	0.71504
7.1671	28.0505	0.131313	0.423775	3.5836	21.7606	0.0515878	0.4766	3.5836	7.2139	0.0577784	0.349704	3.5836	11.8396	0.0577784	0.485301
7.7184	16.9495	0.141413	0.256066	3.8592	24.4691	0.0555552	0.535921	3.8592	6.2741	0.0622219	0.304146	3.8592	12.1768	0.0622219	0.499123
8.2698	13.0909	0.151516	0.197772	4.1349	23.9082	0.0595241	0.523637	4.1349	3.5733	0.066667	0.173221	4.1349	19.1556	0.066667	0.785181
8.8211	14.0606	0.161617	0.212422	4.4105	25.8199	0.0634915	0.565507	4.4105	6.4601	0.0711105	0.313162	4.4105	13.8362	0.0711105	0.567141
9.3724	26.1818	0.171717	0.395544	4.6862	17.4557	0.0674603	0.382314	4.6862	7.6818	0.0755556	0.372386	4.6862	14.4156	0.0755556	0.59089
9.9237	32	0.181818	0.483443	4.9619	15.7959	0.0714292	0.345961	4.9619	6.928	0.0800007	0.335844	4.9619	14.336	0.0800007	0.587628
10.475	27.4747	0.191919	0.415076	5.2375	13.1172	0.0753966	0.287292	5.2375	5.9036	0.0844442	0.286185	5.2375	13.8243	0.0844442	0.566653
11.0263	19.9091	0.202019	0.300778	5.5132	18.5402	0.0793654	0.406067	5.5132	7.7378	0.0888893	0.375101	5.5132	13.3481	0.0888893	0.547134
11.5777	34.303	0.212122	0.518236	5.7888	18.4444	0.0833329	0.403969	5.7888	7.7755	0.0933328	0.376928	5.7888	9.3796	0.0933328	0.384467
12.129	28.5556	0.222223	0.431406	6.0645	19.7108	0.0873017	0.431705	6.0645	10.7422	0.0977779	0.520743	6.0645	8.4908	0.0977779	0.348035
12.6803	27.7172	0.232323	0.41874	6.3401	19.9885	0.0912691	0.437787	6.3401	10.0645	0.102221	0.487891	6.3401	17.4388	0.102221	0.71481
13.2316	40.5455	0.242424	0.612545	6.6158	21.4989	0.095238	0.470868	6.6158	5.8059	0.106667	0.281449	6.6158	9.3493	0.106667	0.383225
13.7829	46.697	0.252525	0.705479	6.8915	19.6261	0.0992068	0.42985	6.8915	5.5556	0.111112	0.269315	6.8915	13.4568	0.111112	0.55159
14.3343	44.4444	0.262627	0.671448	7.1671	34.8297	0.103174	0.762839	7.1671	5.1772	0.115555	0.250972	7.1671	14.913	0.115555	0.611279
14.8856	30.5455	0.272728	0.461469	7.4428	35.1837	0.107143	0.770592	7.4428	4.0512	0.12	0.196388	7.4428	15.6	0.12	0.639439
15.4369	22.1818	0.282829	0.335114	7.7184	43.679	0.11111	0.956656	7.7184	9.061	0.124444	0.439245	7.7184	12.5614	0.124444	0.514887
15.9882	20.3838	0.292929	0.30795	7.9941	33.4339	0.115079	0.732268	7.9941	4.3826	0.128889	0.212453	7.9941	14.1392	0.128889	0.579561
16.5395	27.9394	0.30303	0.422097	8.2698	26.8798	0.119048	0.58872	8.2698	4.2133	0.133334	0.204246	8.2698	11.8	0.133334	0.483678
17.0908	19.9192	0.313131	0.300931	8.5454	21.0818	0.123016	0.461733	8.5454	6.8208	0.137777	0.330648	8.5454	17.7798	0.137777	0.728788
17.6422	25.9899	0.323233	0.392645	8.8211	19.9698	0.126984	0.437378	8.8211	5.9467	0.142223	0.288275	8.8211	16.3309	0.142223	0.669398
18.1935	36	0.333334	0.543873	9.0967	25.1168	0.130952	0.550107	9.0967	4.4235	0.146666	0.214435	9.0967	14.6827	0.146666	0.601839
18.7448	21.6364	0.343435	0.326874	9.3724	35.16	0.134921	0.770073	9.3724	5.7632	0.151111	0.279379	9.3724	10.5843	0.151111	0.433847
19.2961	22.7071	0.353535	0.34305	9.6481	17.2469	0.13889	0.377741	9.6481	4.2533	0.155556	0.206185	9.6481	7.3235	0.155556	0.300188
19.8474	25.7273	0.363636	0.388677	9.9237	22.0204	0.142857	0.48229	9.9237	6.76	0.16	0.3277	9.9237	14.056	0.16	0.576151
20.3987	34.0707	0.373737	0.514726	10.1994	16.3057	0.146826	0.357127	10.1994	9.7234	0.164445	0.471355	10.1994	16.7408	0.164445	0.6862
20.9501	35.596	0.383839	0.53777	10.475	18.3427	0.150793	0.401741	10.475	8.2521	0.168888	0.400032	10.475	10.5155	0.168888	0.431027
21.5014	42.3636	0.39394	0.640012	10.7507	22.068	0.154762	0.483333	10.7507	6.8997	0.173334	0.334473	10.7507	10.5431	0.173334	0.432158
22.0527	33.0707	0.404041	0.499619	11.0263	19.8914	0.158729	0.435661	11.0263	7.4267	0.177777	0.36002	11.0263	13.0444	0.177777	0.534685
22.604	29.6869	0.414141	0.448497	11.302	22.0819	0.162698	0.483637	11.302	9.5936	0.182222	0.465063	11.302	6.9501	0.182222	0.284882
23.1553	41.8788	0.424242	0.632688	11.5777	24.3333	0.166667	0.532947	11.5777	9.6491	0.186667	0.467754	11.5777	15.1271	0.186667	0.620055
23.7066	60.0606	0.434343	0.907371	11.8533	25.887	0.170635	0.566976	11.8533	7.0736	0.191111	0.342903	11.8533	18.7353	0.191111	0.767953
24.258	53.8889	0.444445	0.814131	12.129	21.0829	0.174603	0.461757	12.129	11.9163	0.195556	0.577659	12.129	14.8611	0.195556	0.609151
24.8093	47.0909	0.454546	0.71143	12.4046	23.2245	0.178571	0.508662	12.4046	7.56	0.199999	0.366481	12.4046	17.6	0.199999	0.721418
25.3606	25.7475	0.464647	0.388983	12.6803	24.6584	0.18254	0.540067	12.6803	5.1858	0.204444	0.251389	12.6803	13.7942	0.204444	0.565419
25.9119	21.9192	0.474747	0.331146	12.956	19.7736	0.186509	0.433081	12.956	4.698	0.20889	0.227742	12.956	20.2611	0.20889	0.830495
26.4632	19.6364	0.484848	0.296659	13.2316	19.0068	0.190476	0.416286	13.2316	7.1595	0.213333	0.347067	13.2316	12.5804	0.213333	0.515666
27.0145	34.0808	0.494949	0.514879	13.5073	25.1543	0.194445	0.550929	13.5073	11.4603	0.217778	0.555554	13.5073	12.8503	0.217778	0.526729
27.5659	31.2626	0.505051	0.472303	13.7829	27.4112	0.198412	0.600359	13.7829	14.8889	0.222222	0.72176	13.7829	10.037	0.222222	0.411413
28.1172	30.6061	0.515152	0.462384	14.0586	18.8617	0.202381	0.413108	14.0586	5.8763	0.226667	0.284862	14.0586	10.6729	0.226667	0.437478
28.6685	32.3838	0.525253	0.489241	14.3343	22.5465	0.20635	0.493813	14.3343	11.5787	0.231112	0.561294	14.3343	10.5936	0.231112	0.434228
29.2198	11.7475	0.535353	0.177476	14.6099	29.0559	0.210317	0.636381	14.6099	20.6286	0.235555	1	14.6099	8.1294	0.235555	0.333221
29.7711	21.9091	0.545454	0.330994	14.8856	26.898	0.214286	0.589119	14.8856	12.5408	0.240001	0.607933	14.8856	5.632	0.240001	0.230854
30.3225	49.4444	0.555557	0.746986	15.1612	25.57	0.218254	0.560033	15.1612	9.8578	0.244444	0.477871	15.1612	9.837	0.244444	0.403215
30.8738	40.4848	0.565657	0.611628	15.4369	22.4691	0.222222	0.492117	15.4369	4.8668	0.248889	0.235925	15.4369	13.56	0.248889	0.55582
31.4251	23.1212	0.575758	0.349306	15.7125	22.7029	0.22619	0.497238	15.7125	3.1605	0.253333	0.15321	15.7125	9.872	0.253333	0.40465
31.9764	30.596	0.585859	0.462232	15.9882	19.5702	0.230159	0.428626	15.9882	5.046	0.257778	0.244612	15.9882	8.6066	0.257778	0.352782
32.5277	34.798	0.595959	0.525714	16.2639	17.3634	0.234127	0.380293	16.2639	8.2105	0.262223	0.398015	16.2639	7.028	0.262223	0.288075
33.079	30.6364	0.60606	0.462842	16.5395	18.517	0.238095	0.405559	16.5395	7.2667	0.266666	0.352263	16.5395	8.7556	0.266666	0.358889
33.6304	27.6263	0.616163	0.417367	16.8152	21.8912	0.242064	0.47946	16.8152	5.8491	0.271111	0.283543	16.8152	11.0668	0.271111	0.453624
34.1817	32.8081	0.626263	0.495651	17.0908	15.4258	0.246031	0.337855	17.0908	4.1641	0.275555	0.201861	17.0908	15.3135	0.275555	0.627695
34.733	44.6364	0.636364	0.674348	17.3665	20.5	0.25	0.44899	17.3665	3.0832	0.28	0.149462	17.3665	10.872	0.28	0.44564
35.2843	66.1919	0.646465	1	17.6422	22.3432	0.253969	0.48936	17.6422	5.8592	0.284445	0.284033	17.6422	6.0612	0.284445	0.248446
35.8356	42.101	0.656565	0.636045	17.9178	25.4868	0.257936	0.558211	17.9178	5.52	0.288889	0.26759	17.9178	8.1432	0.288889	0.333787
36.3869	25.6667	0.666666	0.387762	18.1935	20.6122	0.261905	0.451448	18.1935	3.8432	0.293334	0.186304	18.1935	9.168	0.293334	0.375793
36.9383	36.8081	0.676769	0.556082	18.4691	18.1373	0.265873	0.397243	18.4691	4.2688	0.297777	0.206936	18.4691	8.5073	0.297777	0.348711
37.4896	29.7778	0.686869	0.449871	18.7448	16.9841	0.269841	0.371985	18.7448	4.2076	0.302222	0.203969	18.7448	10.9097	0.302222	0.447185
38.0409	28.3939	0.69697	0.428963	19.0204	16.381	0.273809	0.358776	19.0204	2.4661	0.306666	0.119548	19.0204	15.8178	0.306666	0.648366
38.5922	36.9697	0.707071	0.558523	19.2961	16.2346	0.277778	0.35557	19.2961	2.6178	0.311111	0.126901	19.2961	13.2321	0.311111	0.542379
39.1435	32.4141	0.717171	0.489699	19.5718	21.9698	0.281746	0.481182	19.5718	5.0043	0.315556	0.24259	19.5718	14.5134	0.315556	0.594899
39.6948	27.8182	0.727272	0.420266	19.8474	16.6327	0.285714	0.364289	19.8474	4.7488	0.32	0.230205	19.8474	15.256	0.32	0.625338
40.2462	20.0101	0.737375	0.302304	20.1231	16.9946	0.289683	0.372215	20.1231	13.4108	0.324445	0.650107	20.1231	11.1415	0.324445	0.456686
40.7975	30.4747	0.747475	0.460399	20.3987	28.7947	0.29365	0.630661	20.3987	8.5653	0.328888	0.415215	20.3987	12.4306	0.328888	0.509526
41.3488	19.697	0.757576	0.297574	20.6744	16.7052	0.297619	0.365877	20.6744	4	0.333333	0.193906	20.6744	16.1111	0.333333	0.660388
41.9001	33.9596	0.767677	0.513048	20.9501	14.0015	0.301588	0.30666	20.9501	1.9947	0.337778	0.0966958	20.9501	12.4725	0.337778	0.511243
42.4514	45.7778	0.777777	0.691592	21.2257	27.6358	0.305555	0.605278	21.2257	0.5788	0.342222	0.0280581	21.2257	15.126	0.342222	0.62001
43.0028	29.3939	0.78788	0.444071	21.5014	35.0658	0.309524	0.76801	21.5014	6.6283	0.346667	0.321316	21.5014	11.4907	0.346667	0.471
43.5541	22.4949	0.797981	0.339844	21.777	32.1149	0.313491	0.703379	21.777	5.3842	0.351111	0.261007	21.777	14.1889	0.351111	0.581598
44.1054	26.4343	0.808081	0.399359	22.0527	18.5946	0.31746	0.407258	22.0527	7.0489	0.355556	0.341705	22.0527	7.7704	0.355556	0.318506
44.6567	18.6364	0.818182	0.281551	22.3284	17.3265	0.321429	0.379484	22.3284	9.9968	0.360001	0.484609	22.3284	6.776	0.360001	0.277746
45.208	34.202	0.828283	0.51671	22.604	18.9975	0.325397	0.416083	22.604	6.4267	0.364444	0.311543	22.604	7.6994	0.364444	0.315596
45.7593	27.0404	0.838383	0.408515	22.8797	22.7405	0.329365	0.498062	22.8797	6.5972	0.368889	0.319808	22.8797	11.0773	0.368889	0.454055
46.3107	23.4848	0.848486	0.354799	23.1553	19.2222	0.333333	0.421004	23.1553	6.4123	0.373333	0.310845	23.1553	9.7431	0.373333	0.399366
46.862	29.7273	0.858587	0.449108	23.431	27.4787	0.337302	0.601838	23.431	3.2978	0.377778	0.159865	23.431	14.6148	0.377778	0.599056
47.4133	38.8485	0.868687	0.586907	23.7066	27.9428	0.341269	0.612002	23.7066	5.098	0.382221	0.247133	23.7066	12.6808	0.382221	0.519782
47.9646	47.4545	0.878788	0.716923	23.9823	26.1644	0.345238	0.573052	23.9823	7.8816	0.386667	0.382071	23.9823	12.6391	0.386667	0.518072
48.5159	50	0.888889	0.755379	24.258	20.5777	0.349207	0.450692	24.258	10.8105	0.391112	0.524054	24.258	9.6285	0.391112	0.394669
49.0672	23.6162	0.898989	0.356784	24.5336	22.6741	0.353174	0.496607	24.5336	8.4864	0.395555	0.41139	24.5336	8.731	0.395555	0.357881
49.6186	21.5455	0.909092	0.325501	24.8093	23.898	0.357143	0.523413	24.8093	3.76	0.4	0.182271	24.8093	11	0.4	0.450886
50.1699	16.7677	0.919193	0.25332	25.0849	10.9444	0.36111	0.239704	25.0849	3.2537	0.404444	0.157728	25.0849	13.4138	0.404444	0.549827
50.7212	18.7879	0.929293	0.28384	25.3606	22.7098	0.365079	0.497389	25.3606	5.4379	0.408889	0.26361	25.3606	15.2159	0.408889	0.623694
51.2725	20.1515	0.939394	0.304441	25.6363	18.4116	0.369048	0.40325	25.6363	7.64	0.413334	0.37036	25.6363	9.1413	0.413334	0.374699
51.8238	23.0101	0.949495	0.347627	25.9119	24.0766	0.373016	0.527325	25.9119	6.232	0.417778	0.302105	25.9119	12.8972	0.417778	0.528652
52.3751	28.5152	0.959595	0.430796	26.1876	27.2833	0.376984	0.597558	26.1876	4.4444	0.422223	0.215448	26.1876	14.5778	0.422223	0.597539
52.9265	33.6364	0.969698	0.508165	26.4632	24.034	0.380952	0.526392	26.4632	1.8795	0.426666	0.0911114	26.4632	19.8107	0.426666	0.812034
53.4778	25.0909	0.979799	0.379063	26.7389	17.9552	0.384921	0.393254	26.7389	3.1154	0.431111	0.151023	26.7389	15.1863	0.431111	0.622481
54.0291	26.0202	0.989899	0.393102	27.0145	21.2222	0.388888	0.464808	27.0145	2.608	0.435555	0.126426	27.0145	13.2578	0.435555	0.543433
54.5804	23	1	0.347475	27.2902	18.4898	0.392857	0.404963	27.2902	5.1296	0.44	0.248664	27.2902	12.616	0.44	0.517125
				27.5659	14.2681	0.396826	0.312499	27.5659	11.3333	0.444445	0.549397	27.5659	13.4074	0.444445	0.549565
				27.8415	17.4443	0.400793	0.382064	27.8415	9.5627	0.448888	0.463565	27.8415	9.7084	0.448888	0.397944
				28.1172	24.2041	0.404762	0.530117	28.1172	1.9317	0.453334	0.0936418	28.1172	17.1058	0.453334	0.701161
				28.3928	45.658	0.408729	1	28.3928	4.5109	0.457777	0.218672	28.3928	18.9512	0.457777	0.776803
				28.6685	24.7498	0.412698	0.542069	28.6685	8.1733	0.462222	0.396212	28.6685	17.2125	0.462222	0.705534
				28.9442	18.8333	0.416667	0.412486	28.9442	16.0667	0.466667	0.778856	28.9442	17.4889	0.466667	0.716864
				29.2198	25.554	0.420635	0.559683	29.2198	7.5093	0.471111	0.364024	29.2198	18.8121	0.471111	0.771101
				29.4955	29.0736	0.424603	0.636769	29.4955	7.6523	0.475556	0.370956	29.4955	18.7677	0.475556	0.769282
				29.7711	23.0204	0.428571	0.504192	29.7711	11.0272	0.479999	0.534559	29.7711	7.192	0.479999	0.294798
				30.0468	16.9019	0.43254	0.370185	30.0468	10.125	0.484445	0.490823	30.0468	3.3011	0.484445	0.135311
				30.3225	19.0033	0.436509	0.41621	30.3225	6.8222	0.48889	0.330716	30.3225	12.9679	0.48889	0.53155
				30.5981	22.3526	0.440476	0.489566	30.5981	5.7157	0.493333	0.277076	30.5981	17.5076	0.493333	0.71763
				30.8738	19.3333	0.444445	0.423437	30.8738	5.5033	0.497778	0.26678	30.8738	11.0144	0.497778	0.451476
				31.1494	13.5392	0.448412	0.296535	31.1494	10.5877	0.502222	0.513253	31.1494	11.0649	0.502222	0.453546
				31.4251	19.9456	0.452381	0.436848	31.4251	13.5451	0.506667	0.656618	31.4251	12.9573	0.506667	0.531115
				31.7007	23.0257	0.456348	0.504308	31.7007	10.5467	0.51111	0.511266	31.7007	8.5407	0.51111	0.35008
				31.9764	22.1905	0.460317	0.486016	31.9764	7.8213	0.515555	0.379148	31.9764	8.5482	0.515555	0.350388
				32.2521	19.2551	0.464286	0.421725	32.2521	4.4576	0.520001	0.216088	32.2521	11.36	0.520001	0.465642
				32.5277	17.6148	0.468254	0.385799	32.5277	6.3936	0.524444	0.309939	32.5277	8.1618	0.524444	0.334549
				32.8034	25.3086	0.472222	0.554308	32.8034	7.7077	0.528889	0.373641	32.8034	18.7642	0.528889	0.769138
				33.079	14.5782	0.47619	0.319291	33.079	4.7733	0.533333	0.231392	33.079	21.6889	0.533333	0.889021
				33.3547	16.227	0.480159	0.355403	33.3547	6.5561	0.537778	0.317816	33.3547	14.7822	0.537778	0.605917
				33.6304	18.5409	0.484127	0.406082	33.6304	6.0183	0.542223	0.291745	33.6304	13.5263	0.542223	0.554438
				33.906	18.3798	0.488095	0.402554	33.906	2.8165	0.546666	0.136534	33.906	16.1582	0.546666	0.662319
				34.1817	13.1827	0.492064	0.288727	34.1817	2.403	0.551112	0.116489	34.1817	12.2801	0.551112	0.503357
				34.4573	18.4504	0.496031	0.4041	34.4573	4.1111	0.555555	0.199291	34.4573	11.0617	0.555555	0.453415
				34.733	8	0.5	0.175216	34.733	7.56	0.56	0.366481	34.733	12.088	0.56	0.495483
				35.0087	18.5935	0.503969	0.407234	35.0087	3.5991	0.564445	0.174471	35.0087	6.7177	0.564445	0.275356
				35.2843	22.0695	0.507936	0.483365	35.2843	11.4992	0.568889	0.55744	35.2843	7.0614	0.568889	0.289444
				35.56	19.9989	0.511905	0.438015	35.56	10.2016	0.573334	0.494537	35.56	5.632	0.573334	0.230854
				35.8356	13.5349	0.515873	0.296441	35.8356	13.2622	0.577777	0.642904	35.8356	9.6099	0.577777	0.393906
				36.1113	11.4549	0.519841	0.250885	36.1113	6.3637	0.582222	0.308489	36.1113	15.5388	0.582222	0.63693
				36.3869	18.8503	0.523809	0.412859	36.3869	8.5664	0.586666	0.415268	36.3869	9.3422	0.586666	0.382934
				36.6626	8.537	0.527778	0.186977	36.6626	8.4016	0.591111	0.407279	36.6626	8.6685	0.591111	0.355319
				36.9383	18.9446	0.531746	0.414924	36.9383	7.4412	0.595556	0.360722	36.9383	10.6233	0.595556	0.435445
				37.2139	28.8673	0.535714	0.632251	37.2139	5.8	0.6	0.281163	37.2139	6	0.6	0.245938
				37.4896	16.2708	0.539683	0.356363	37.4896	3.4533	0.604445	0.167404	37.4896	8.977	0.604445	0.367964
				37.7652	14.8741	0.54365	0.325772	37.7652	8.1355	0.608888	0.39438	37.7652	13.0017	0.608888	0.532935
				38.0409	19.1769	0.547619	0.420012	38.0409	10.56	0.613333	0.511911	38.0409	13.2284	0.613333	0.542228
				38.3166	18.6984	0.551588	0.409532	38.3166	6.0928	0.617779	0.295357	38.3166	15.6014	0.617779	0.639496
				38.5922	15.2716	0.555555	0.334478	38.5922	7.9467	0.622222	0.385227	38.5922	11.116	0.622222	0.455641
				38.8679	16.949	0.559524	0.371216	38.8679	9.0352	0.626667	0.437994	38.8679	10.5529	0.626667	0.43256
				39.1435	18.7576	0.563491	0.410828	39.1435	8.27	0.631111	0.4009	39.1435	10.0877	0.631111	0.413491
				39.4192	23.9398	0.56746	0.524329	39.4192	9.7188	0.635556	0.471132	39.4192	7.2196	0.635556	0.295929
				39.6948	25.0612	0.571428	0.54889	39.6948	3.9968	0.639999	0.19375	39.6948	8.16	0.639999	0.334476
				39.9705	27.2499	0.575397	0.596826	39.9705	5.56	0.644444	0.269529	39.9705	7.2346	0.644444	0.296544
				40.2462	25.8556	0.579365	0.566288	40.2462	2.3742	0.648889	0.115093	40.2462	9.7898	0.648889	0.401281
				40.5218	22.8333	0.583333	0.500094	40.5218	7.6901	0.653333	0.372788	40.5218	10.6329	0.653333	0.435839
				40.7975	21.0179	0.587302	0.460333	40.7975	3.2713	0.657778	0.158581	40.7975	7.2535	0.657778	0.297318
				41.0731	15.0927	0.591269	0.33056	41.0731	7.5113	0.662222	0.364121	41.0731	16.1224	0.662222	0.660852
				41.3488	12.932	0.595238	0.283236	41.3488	5.6667	0.666667	0.274701	41.3488	13.2222	0.666667	0.541973
				41.6245	21.0479	0.599207	0.46099	41.6245	6.702	0.671112	0.324889	41.6245	11.7066	0.671112	0.479849
				41.9001	24.4782	0.603174	0.536121	41.9001	5.232	0.675555	0.253628	41.9001	12.6849	0.675555	0.51995
				42.1758	21.8163	0.607143	0.47782	42.1758	3.0752	0.68	0.149075	42.1758	14.288	0.68	0.58566
				42.4514	20.6049	0.61111	0.451288	42.4514	3.9068	0.684444	0.189388	42.4514	10.5947	0.684444	0.434273
				42.7271	23.0198	0.615079	0.504179	42.7271	4.3911	0.688889	0.212865	42.7271	17.3481	0.688889	0.711093
				43.0028	27.424	0.619048	0.60064	43.0028	7.4896	0.693334	0.363069	43.0028	24.3964	0.693334	1
				43.2784	20.2401	0.623016	0.443298	43.2784	8.5381	0.697778	0.413896	43.2784	14.1353	0.697778	0.579401
				43.5541	17.2976	0.626984	0.378851	43.5541	6.2761	0.702223	0.304243	43.5541	11.6352	0.702223	0.476923
				43.8297	26.5567	0.630952	0.581644	43.8297	3.7301	0.706666	0.180822	43.8297	10.5547	0.706666	0.432634
				44.1054	26.3482	0.634921	0.577077	44.1054	4.1956	0.711111	0.203388	44.1054	9.1531	0.711111	0.375182
				44.381	29.358	0.638888	0.642998	44.381	4.1799	0.715555	0.202626	44.381	10.1425	0.715555	0.415738
				44.6567	38.3469	0.642857	0.839873	44.6567	5.4352	0.72	0.263479	44.6567	12.792	0.72	0.52434
				44.9324	31.8444	0.646826	0.697455	44.9324	6.216	0.724445	0.301329	44.9324	11.8379	0.724445	0.485231
				45.208	27.5482	0.650793	0.60336	45.208	9.1602	0.728889	0.444053	45.208	14.7	0.728889	0.602548
				45.4837	17.678	0.654762	0.387183	45.4837	8.5067	0.733334	0.412374	45.4837	13.5333	0.733334	0.554725
				45.7593	19.9327	0.658729	0.436565	45.7593	5.4036	0.737777	0.261947	45.7593	17.8139	0.737777	0.730186
				46.035	13.8884	0.662698	0.304183	46.035	4.8176	0.742222	0.23354	46.035	15.707	0.742222	0.643824
				46.3107	16.3333	0.666667	0.357731	46.3107	7.4613	0.746667	0.361697	46.3107	14.1431	0.746667	0.579721
				46.5863	17.7454	0.670635	0.388659	46.5863	9.2832	0.751111	0.450016	46.5863	8.2776	0.751111	0.339296
				46.862	17.3772	0.674603	0.380595	46.862	3.0356	0.755556	0.147155	46.862	13.1728	0.755556	0.539949
				47.1376	16.6837	0.678571	0.365406	47.1376	4.9328	0.759999	0.239124	47.1376	12.968	0.759999	0.531554
				47.4133	15.5011	0.68254	0.339505	47.4133	5	0.764445	0.242382	47.4133	21.2617	0.764445	0.87151
				47.6889	15.8991	0.686507	0.348222	47.6889	6.1317	0.768888	0.297243	47.6889	19.8911	0.768888	0.815329
				47.9646	19.2063	0.690476	0.420656	47.9646	7.5051	0.773333	0.36382	47.9646	17.872	0.773333	0.732567
				48.2403	26.9383	0.694445	0.590002	48.2403	6.2222	0.777778	0.30163	48.2403	12.2963	0.777778	0.504021
				48.5159	32.2222	0.698412	0.70573	48.5159	6.1244	0.782222	0.296889	48.5159	14.5118	0.782222	0.594834
				48.7916	18.7063	0.702381	0.409705	48.7916	6.3376	0.786667	0.307224	48.7916	14.1742	0.786667	0.580996
				49.0672	22.6271	0.706348	0.495578	49.0672	2.7732	0.79111	0.134435	49.0672	9.6785	0.79111	0.396718
				49.3429	10.1498	0.710317	0.222301	49.3429	4.0482	0.795556	0.196242	49.3429	14.3274	0.795556	0.587275
				49.6186	20.2041	0.714286	0.44251	49.6186	3.44	0.800001	0.166759	49.6186	15	0.800001	0.614845
				49.8942	32.1534	0.718254	0.704223	49.8942	9.4462	0.804444	0.457918	49.8942	17.5654	0.804444	0.72
				50.1699	21.1481	0.722222	0.463185	50.1699	8.4258	0.808889	0.408452	50.1699	17.122	0.808889	0.701825
				50.4455	27.3651	0.72619	0.59935	50.4455	5.0747	0.813333	0.246003	50.4455	16.5093	0.813333	0.67671
				50.7212	16.9189	0.730159	0.370557	50.7212	5.0391	0.817778	0.244277	50.7212	22.0844	0.817778	0.905232
				50.9969	19.9899	0.734127	0.437818	50.9969	7.6489	0.822223	0.370791	50.9969	13.8765	0.822223	0.568793
				51.2725	17.9796	0.738095	0.393789	51.2725	5.9835	0.826666	0.290058	51.2725	11.8827	0.826666	0.487068
				51.5482	16.2381	0.742064	0.355646	51.5482	4.5138	0.831112	0.218813	51.5482	9.9337	0.831112	0.407179
				51.8238	20.9506	0.746031	0.458859	51.8238	3.9854	0.835555	0.193198	51.8238	10.7128	0.835555	0.439114
				52.0995	20	0.75	0.438039	52.0995	3.768	0.84	0.182659	52.0995	14.056	0.84	0.576151
				52.3751	19.0554	0.753967	0.417351	52.3751	2.2978	0.844444	0.111389	52.3751	15.2568	0.844444	0.625371
				52.6508	18.3684	0.757936	0.402304	52.6508	7.8105	0.848889	0.378625	52.6508	18.5047	0.848889	0.758501
				52.9265	16.9388	0.761905	0.370993	52.9265	13.4752	0.853334	0.653229	52.9265	12.9947	0.853334	0.532648
				53.2021	20.6148	0.765873	0.451505	53.2021	13.7972	0.857777	0.668838	53.2021	11.2141	0.857777	0.459662
				53.4778	27.5387	0.769841	0.603152	53.4778	6.5527	0.862223	0.317651	53.4778	12.7661	0.862223	0.523278
				53.7534	23.4433	0.773809	0.513454	53.7534	4.1867	0.866666	0.202956	53.7534	19	0.866666	0.778803
				54.0291	26.0617	0.777778	0.570802	54.0291	9.3152	0.871111	0.451567	54.0291	16.3715	0.871111	0.671062
				54.3048	32.6552	0.781746	0.715213	54.3048	12.2487	0.875556	0.593773	54.3048	17.2335	0.875556	0.706395
				54.5804	33.2653	0.785714	0.728575	54.5804	7.1408	0.88	0.34616	54.5804	13.64	0.88	0.559099
				54.8561	28.7327	0.789683	0.629303	54.8561	6.9781	0.884445	0.338273	54.8561	11.1248	0.884445	0.456002
				55.1317	29.936	0.79365	0.655657	55.1317	12	0.888888	0.581717	55.1317	21.3951	0.888888	0.876978
				55.4074	27.8435	0.797619	0.609827	55.4074	8.3435	0.893333	0.404463	55.4074	19.08	0.893333	0.782083
				55.6831	26.3958	0.801588	0.57812	55.6831	18.0619	0.897779	0.875576	55.6831	12.4933	0.897779	0.512096
				55.9587	19.6605	0.805555	0.430604	55.9587	12.1753	0.902222	0.590215	55.9587	16.8277	0.902222	0.689762
				56.2344	18.0454	0.809524	0.39523	56.2344	6.2064	0.906667	0.300864	56.2344	18.2071	0.906667	0.746303
				56.51	18.4807	0.813491	0.404764	56.51	6.36	0.911111	0.30831	56.51	19.1877	0.911111	0.786497
				56.7857	16.0459	0.81746	0.351437	56.7857	3.5556	0.915556	0.172363	56.7857	18.4904	0.915556	0.757915
				57.0613	17.3571	0.821428	0.380155	57.0613	5.04	0.919999	0.244321	57.0613	21.16	0.919999	0.867341
				57.337	15.4538	0.825397	0.338469	57.337	4.811	0.924444	0.23322	57.337	13.7272	0.924444	0.562673
				57.6127	28.4701	0.829365	0.623551	57.6127	7.5488	0.92889	0.365939	57.6127	9.9164	0.92889	0.40647
				57.8883	29.4444	0.833333	0.64489	57.8883	7.76	0.933333	0.376177	57.8883	14.5333	0.933333	0.595715
				58.164	30.8125	0.837302	0.674854	58.164	6.0768	0.937778	0.294581	58.164	15.8	0.937778	0.647637
				58.4396	26.5999	0.841269	0.58259	58.4396	10.2439	0.942222	0.496587	58.4396	18.7869	0.942222	0.770069
				58.7153	24.2812	0.845238	0.531806	58.7153	14.7957	0.946667	0.717242	58.7153	14.9102	0.946667	0.611164
				58.991	27.3444	0.849207	0.598896	58.991	8.3868	0.951112	0.406562	58.991	17.9668	0.951112	0.736453
				59.2666	22.6012	0.853174	0.495011	59.2666	6.2	0.955555	0.300554	59.2666	23.1753	0.955555	0.949948
				59.5423	23.9184	0.857143	0.52386	59.5423	9.6432	0.96	0.467467	59.5423	17.84	0.96	0.731255
				59.8179	19.1235	0.86111	0.418842	59.8179	9.5636	0.964444	0.463609	59.8179	15.4314	0.964444	0.632528
				60.0936	34.6503	0.865079	0.75891	60.0936	12.6439	0.968889	0.612931	60.0936	18.9247	0.968889	0.775717
				60.3692	22.5295	0.869047	0.49344	60.3692	8.0203	0.973333	0.388795	60.3692	16.5538	0.973333	0.678535
				60.6449	11.8587	0.873016	0.259729	60.6449	4.4533	0.977778	0.21588	60.6449	13.358	0.977778	0.54754
				60.9206	8.5766	0.876984	0.187844	60.9206	4.5586	0.982223	0.220984	60.9206	16.4403	0.982223	0.673882
				61.1962	11.5964	0.880952	0.253984	61.1962	3.5755	0.986666	0.173327	61.1962	14.2018	0.986666	0.582127
				61.4719	12.174	0.884921	0.266635	61.4719	8.0836	0.991111	0.391864	61.4719	12.1683	0.991111	0.498774
				61.7475	18.4568	0.888888	0.40424	61.7475	2.0309	0.995555	0.0984507	61.7475	7.9665	0.995555	0.326544
				62.0232	20.0204	0.892857	0.438486	62.0232	8	1	0.387811	62.0232	13	1	0.532866
				62.2989	16.8095	0.896826	0.368161
				62.5745	12.2196	0.900793	0.267633
				62.8502	19.1088	0.904762	0.41852
				63.1258	12.5915	0.908729	0.275779
				63.4015	24.003	0.912698	0.525713
				63.6772	16.4444	0.916667	0.360165
				63.9528	17.6505	0.920635	0.386581
				64.2285	23.0931	0.924603	0.505784
				64.5041	17.4082	0.928571	0.381274
				64.7798	13.1122	0.93254	0.287183
				65.0554	13.2918	0.936507	0.291117
				65.3311	18.602	0.940476	0.40742
				65.6068	17.9753	0.944445	0.393694
				65.8824	14.985	0.948412	0.328201
				66.1581	18.873	0.952381	0.413356
				66.4337	23.9647	0.956348	0.524874
				66.7094	24.5238	0.960317	0.537119
				66.9851	21.9388	0.964286	0.480503
				67.2607	18.3797	0.968254	0.402552
				67.5364	19.463	0.972222	0.426278
				67.812	27.4263	0.97619	0.60069
				68.0877	31.5052	0.980159	0.690026
				68.3633	24.0748	0.984126	0.527285
				68.639	26.3175	0.988095	0.576405
				68.9147	28.5939	0.992064	0.626263
				69.1903	26.1112	0.996031	0.571887
				69.466	17	1	0.372333

## Sheet: Par6 late
X	Y			X	Y			X	Y			X	Y			X	Y
0	17	0	0.200904	0	15	0	0.257402	0	96.3333	0	0.718927	0	18	0	0.189474	0	12	0	0.135593
0.3459	23.8235	0.029408	0.281543	0.3459	17.2514	0.0196054	0.296037	0.34594	63.0552	0.0370366	0.470575	0.2915	15.7538	0.0153862	0.165829	0.2915	14.5833	0.0166684	0.164783
0.6919	3	0.0588245	0.0354536	0.6919	21.2111	0.0392165	0.363986	0.69189	75.0835	0.0740743	0.560341	0.5829	39.2	0.030767	0.412632	0.5829	22.1667	0.033331	0.250471
1.0378	13.3235	0.0882325	0.157455	1.0378	10.7301	0.0588219	0.18413	1.03783	62.7106	0.111111	0.468004	0.8744	22.1538	0.0461532	0.233198	0.8744	31.25	0.0499994	0.353107
1.3838	21.4706	0.117649	0.253737	1.3838	18.8258	0.0784329	0.323054	1.38378	58.6914	0.148149	0.438009	1.1659	10.4308	0.0615394	0.109798	1.1659	22.3333	0.0666678	0.252354
1.7297	22.5	0.147057	0.265902	1.7297	18.5444	0.0980383	0.318225	1.72972	50.6516	0.185185	0.378008	1.4574	23.5385	0.0769255	0.247774	1.4574	41.0833	0.0833362	0.464218
2.0757	13	0.176474	0.153632	2.0757	13.2353	0.117649	0.22712	2.07566	56.6804	0.222222	0.423001	1.7488	15.6462	0.0923064	0.164697	1.7488	24.5	0.0999989	0.276836
2.4216	28.4412	0.205882	0.336114	2.4216	18.2872	0.137255	0.313811	2.42161	71.2718	0.259259	0.531895	2.0403	28.4615	0.107693	0.299595	2.0403	24.1667	0.116667	0.27307
2.7676	14.7647	0.235298	0.174487	2.7676	11.4521	0.156866	0.19652	2.76755	86.0604	0.296296	0.642261	2.3318	12.1385	0.123079	0.127774	2.3318	31	0.133336	0.350282
3.1135	23.2941	0.264706	0.275287	3.1135	16.6782	0.176471	0.286201	3.1135	73.4568	0.333334	0.548201	2.6232	16.8462	0.13846	0.177328	2.6232	28.75	0.149998	0.324859
3.4594	46	0.294114	0.543622	3.4594	13.609	0.196077	0.233533	3.45944	60.414	0.37037	0.450864	2.9147	25.9231	0.153846	0.272875	2.9147	28.1667	0.166667	0.318268
3.8054	18.4118	0.323531	0.217588	3.8054	14.489	0.215688	0.248634	3.80539	61.872	0.407408	0.461745	3.2062	15	0.169232	0.157895	3.2062	23.5	0.183335	0.265537
4.1513	23.7647	0.352939	0.280848	4.1513	10.3149	0.235293	0.177005	4.15133	36.085	0.444445	0.269299	3.4976	25.3077	0.184613	0.266397	3.4976	47	0.199998	0.531073
4.4973	21.1471	0.382355	0.249914	4.4973	12.7716	0.254904	0.219163	4.49727	56.0948	0.481481	0.41863	3.7891	13.6	0.199999	0.143158	3.7891	28.3333	0.216666	0.32015
4.8432	23.2353	0.411763	0.274592	4.8432	26.1661	0.27451	0.449015	4.84322	51.8173	0.518519	0.386708	4.0806	18.9385	0.215385	0.199353	4.0806	44.3333	0.233334	0.500941
5.1892	43.4706	0.44118	0.51373	5.1892	33.3253	0.294121	0.571868	5.18916	65.3237	0.555555	0.487505	4.3721	10.8462	0.230771	0.114171	4.3721	27.5	0.250003	0.310734
5.5351	22.5882	0.470588	0.266944	5.5351	26.3287	0.313726	0.451805	5.53511	55.5563	0.592593	0.414612	4.6635	30.4923	0.246152	0.320972	4.6635	31.3333	0.266666	0.354049
5.881	46	0.499996	0.543622	5.881	31.6667	0.333331	0.543406	5.88105	66.572	0.62963	0.496821	4.955	34.7692	0.261538	0.365992	4.955	24.8333	0.283334	0.280602
6.227	27	0.529412	0.319083	6.227	20.3391	0.352943	0.349022	6.22699	66.4815	0.666666	0.496145	5.2465	14	0.276924	0.147368	5.2465	40	0.300002	0.451977
6.5729	40.0882	0.55882	0.473757	6.5729	25.9666	0.372548	0.445591	6.57294	91.6295	0.703704	0.683823	5.5379	7.6923	0.292305	0.0809716	5.5379	41.3333	0.316665	0.467043
6.9189	40.7647	0.588237	0.481752	6.9189	9.5767	0.392159	0.164338	6.91888	79.9866	0.740741	0.596933	5.8294	32.3077	0.307691	0.340081	5.8294	27.3333	0.333333	0.308851
7.2648	42.9118	0.617645	0.507126	7.2648	25.0035	0.411764	0.429064	7.26483	55.5171	0.777778	0.414319	6.1209	16.7077	0.323078	0.175871	6.1209	43.5	0.350002	0.491525
7.6108	36.1765	0.647061	0.427529	7.6108	19.2826	0.431375	0.330893	7.61077	69.7055	0.814815	0.520206	6.4123	16.0923	0.338459	0.169393	6.4123	29.3333	0.366664	0.33145
7.9567	75	0.676469	0.88634	7.9567	18.3114	0.450981	0.314227	7.95671	61.615	0.851851	0.459827	6.7038	23.9077	0.353845	0.25166	6.7038	40.75	0.383333	0.460452
8.3027	70.4118	0.705886	0.832118	8.3027	18.917	0.470592	0.324619	8.30266	55.5446	0.888889	0.414524	6.9953	13.5692	0.369231	0.142834	6.9953	27	0.400001	0.305085
8.6486	56.7059	0.735294	0.670143	8.6486	19.0784	0.490197	0.327388	8.6486	71.2681	0.925926	0.531867	7.2868	15.0769	0.384617	0.158704	7.2868	30.0833	0.41667	0.339924
8.9945	76.3529	0.764702	0.902329	8.9945	21.8397	0.509803	0.374773	8.99455	133.996	0.962963	1	7.5782	21.6	0.399998	0.227368	7.5782	42.8333	0.433332	0.483992
9.3405	37.1471	0.794118	0.439	9.3405	31.2976	0.529414	0.537072	9.34049	112.222	1	0.837504	7.8697	43.2462	0.415384	0.455223	7.8697	42.75	0.450001	0.483051
9.6864	52.9412	0.823526	0.625652	9.6864	33.97	0.549019	0.582931					8.1612	40.8	0.43077	0.429474	8.1612	44	0.466669	0.497175
10.0324	54.8824	0.852943	0.648593	10.0324	33.0104	0.56863	0.566464					8.4526	27.1231	0.446151	0.285506	8.4526	36.0833	0.483332	0.407721
10.3783	45.5294	0.882351	0.538061	10.3783	35.7232	0.588236	0.613016					8.7441	30.9231	0.461537	0.325506	8.7441	42	0.5	0.474576
10.7243	48.6471	0.911767	0.574905	10.7243	45.0208	0.607847	0.772564					9.0356	14.0308	0.476923	0.147693	9.0356	29.3333	0.516668	0.33145
11.0702	54.7647	0.941175	0.647202	11.0702	41.3218	0.627452	0.709089					9.3271	21.0308	0.49231	0.221377	9.3271	27.3333	0.533337	0.308851
11.4162	84.6176	0.970592	1	11.4162	38.9689	0.647063	0.668713					9.6185	22.1846	0.50769	0.233522	9.6185	26.25	0.549999	0.29661
11.7621	64	1	0.756344	11.7621	44.3333	0.666669	0.760767					9.91	25.6308	0.523077	0.269798	9.91	36.8333	0.566668	0.416195
				12.108	41.8016	0.686274	0.717322					10.2015	26.7692	0.538463	0.281781	10.2015	21.8333	0.583336	0.246704
				12.454	34.609	0.705885	0.593896					10.4929	32.2462	0.553844	0.339434	10.4929	46	0.599999	0.519774
				12.7999	33.4014	0.72549	0.573174					10.7844	28.8462	0.56923	0.303644	10.7844	40.1667	0.616667	0.453861
				13.1459	37.4971	0.745101	0.643456					11.0759	30.7077	0.584616	0.323239	11.0759	36.5	0.633336	0.412429
				13.4918	49.2284	0.764707	0.844767					11.3673	41	0.599997	0.431579	11.3673	55.5	0.649998	0.627119
				13.8378	38.8651	0.784318	0.666932					11.6588	24.3077	0.615383	0.255871	11.6588	41.3333	0.666667	0.467043
				14.1837	46.4095	0.803923	0.796395					11.9503	33.3231	0.630769	0.350769	11.9503	69.5	0.683335	0.785311
				14.5297	34.699	0.823534	0.595441					12.2418	49.4154	0.646155	0.520162	12.2418	43.5	0.700003	0.491525
				14.8756	19.2295	0.84314	0.329981					12.5332	36.4154	0.661536	0.38332	12.5332	43.25	0.716666	0.488701
				15.2215	34.1684	0.862745	0.586335					12.8247	51.8923	0.676922	0.546235	12.8247	38.3333	0.733334	0.433145
				15.5675	30.8789	0.882356	0.529887					13.1162	47.4615	0.692309	0.499595	13.1162	60.5	0.750003	0.683616
				15.9134	39.5444	0.901962	0.678588					13.4076	74.3385	0.707689	0.782511	13.4076	62.6667	0.766666	0.708098
				16.2594	41.2653	0.921573	0.708119					13.6991	69.6462	0.723076	0.733118	13.6991	52.3333	0.783334	0.591337
				16.6053	25.9308	0.941178	0.444977					13.9906	46.2154	0.738462	0.486478	13.9906	38	0.800002	0.429379
				16.9513	37.1753	0.960789	0.637934					14.282	70.7846	0.753843	0.745101	14.282	52.3333	0.816665	0.591337
				17.2972	58.2745	0.980395	1					14.5735	78.6154	0.769229	0.827531	14.5735	88.5	0.833333	1
				17.6431	44	1	0.755047					14.865	73.4462	0.784615	0.773118	14.865	60.5	0.850002	0.683616
												15.1565	86.6	0.800001	0.911579	15.1565	77.6667	0.86667	0.87759
												15.4479	78.8308	0.815382	0.829798	15.4479	71.75	0.883333	0.810734
												15.7394	87.8308	0.830768	0.924535	15.7394	75.5	0.900001	0.853107
												16.0309	94.7692	0.846154	0.997571	16.0309	64.1667	0.91667	0.725047
												16.3223	68.4462	0.861535	0.720486	16.3223	42.3333	0.933332	0.478342
												16.6138	88.5846	0.876921	0.932469	16.6138	69.5	0.950001	0.785311
												16.9053	74.0154	0.892307	0.779109	16.9053	45.5	0.966669	0.514124
												17.1967	70.9231	0.907688	0.746559	17.1967	73	0.983332	0.824859
												17.4882	73.1538	0.923074	0.77004	17.4882	70	1	0.79096
												17.7797	72.8	0.938461	0.766316
												18.0712	93.9692	0.953847	0.989149
												18.3626	82.3385	0.969228	0.866721
												18.6541	86.9231	0.984614	0.91498
												18.9456	95	1	1

## Sheet: Par1 late
X	Y			X	Y			X	Y			X	Y			X	Y			X	Y
0	21.439	0	0.818436	0	18.2222	0	0.746909	0	60	0	0.580292	0	48.32	0	0.747756	0	73	0	1	0	57	0	0.508599
0.2666	22.7317	0.0114951	0.867784	0.2666	19.3968	0.0232576	0.795055	0.3459	57.4727	0.031246	0.555849	0.3459	50.94	0.0166646	0.788301	0.2666	65.1539	0.022729	0.892519	0.2666	70.4262	0.0232576	0.628399
0.5332	23.0732	0.0229903	0.880821	0.5332	20.0476	0.0465153	0.821731	0.6919	63.5625	0.0625011	0.614747	0.6919	51.68	0.033334	0.799752	0.5332	60.5578	0.045458	0.829559	0.5332	92.027	0.0465153	0.821138
0.7997	21.7073	0.0344811	0.828678	0.7997	21.0159	0.0697642	0.861418	1.0378	70.2852	0.0937472	0.679766	1.0378	51.08	0.0499986	0.790467	0.7997	58.2314	0.0681785	0.79769	0.7997	85.2023	0.0697642	0.760243
1.0663	20.4634	0.0459763	0.781192	1.0663	23.5079	0.0930218	0.963565	1.3838	71.2617	0.125002	0.68921	1.3838	53.5	0.066668	0.827917	1.0663	60.5702	0.0909075	0.829729	1.0663	88.1082	0.0930218	0.786171
1.3329	20.561	0.0574714	0.784918	1.3329	22.8254	0.116279	0.935589	1.7297	64.2058	0.156248	0.620969	1.7297	57.5	0.0833325	0.889817	1.3329	57.2603	0.113637	0.784388	1.3329	82.5587	0.116279	0.736654
1.5995	20.122	0.0689666	0.768159	1.5995	24.3968	0.139537	1	2.0757	72.6914	0.187503	0.703037	2.0757	59.42	0.100002	0.91953	1.5995	52.6074	0.136366	0.720649	1.5995	72.199	0.139537	0.644217
1.8661	20.122	0.0804617	0.768159	1.8661	23.4286	0.162795	0.960312	2.4216	70.9827	0.218749	0.686512	2.4216	61.7	0.116667	0.954813	1.8661	52.7097	0.159095	0.722051	1.8661	74.3975	0.162795	0.663834
2.1326	18.9512	0.0919525	0.723464	2.1326	23.2064	0.186044	0.951203	2.7676	79.7188	0.250005	0.771003	2.7676	64.62	0.133336	1	2.1326	47.0992	0.181815	0.645195	2.1326	71.8421	0.186044	0.641032
2.3992	19.7073	0.103448	0.752328	2.3992	22.8571	0.209301	0.93689	3.1135	74.4719	0.281251	0.720258	3.1135	58.38	0.15	0.903435	2.3992	43.9886	0.204544	0.602584	2.3992	87.02	0.209301	0.776462
2.6658	20.0244	0.114943	0.764433	2.6658	20.4603	0.232559	0.838647	3.4594	71.9268	0.312497	0.695643	3.4594	60.32	0.166665	0.933457	2.6658	42.7273	0.227273	0.585305	2.6658	84.0173	0.232559	0.749669
2.9324	20.7317	0.126438	0.791434	2.9324	19.9365	0.255817	0.817176	3.8054	84.249	0.343752	0.814817	3.8054	57.08	0.183334	0.883318	2.9324	46.5	0.250002	0.636986	2.9324	75.2088	0.255817	0.671073
3.199	20.7561	0.137933	0.792366	3.199	17.2857	0.279074	0.708523	4.1513	90.0625	0.374998	0.871043	4.1513	53.96	0.199999	0.835036	3.199	50.3306	0.272731	0.68946	3.199	80.1017	0.279074	0.714731
3.4655	22.5854	0.149424	0.862199	3.4655	17.8889	0.302323	0.733246	4.4973	103.396	0.406253	1	4.4973	51.14	0.216668	0.791396	3.4655	59.53	0.295452	0.815479	3.4655	92.6587	0.302323	0.826775
3.7321	22.6098	0.160919	0.863131	3.7321	17.3016	0.325581	0.709174	4.8432	101.892	0.437499	0.985448	4.8432	52.8	0.233333	0.817084	3.7321	58.5041	0.318181	0.801426	3.7321	86.4738	0.325581	0.771588
3.9987	22.3415	0.172414	0.852889	3.9987	17.2222	0.348838	0.70592	5.1892	96.3049	0.468754	0.931416	5.1892	52.78	0.250002	0.816775	3.9987	47.8647	0.34091	0.655681	3.9987	86.7664	0.348838	0.774199
4.2653	23.1463	0.183909	0.883612	4.2653	16.5714	0.372096	0.679245	5.5351	97.8125	0.5	0.945997	5.5351	51.42	0.266667	0.795729	4.2653	55.6446	0.363639	0.762255	4.2653	93.9367	0.372096	0.838178
4.5319	22.7561	0.195405	0.868716	4.5319	15.6667	0.395354	0.64216	5.881	94.573	0.531246	0.914666	5.881	52.3	0.283332	0.809347	4.5319	60.344	0.386368	0.82663	4.5319	92.9773	0.395354	0.829617
4.7984	22.2683	0.206895	0.850094	4.7984	15.7936	0.418603	0.647365	6.227	93.627	0.562501	0.905517	6.227	50.66	0.300001	0.783968	4.7984	57.0496	0.409088	0.781501	4.7984	99.1547	0.418603	0.884737
5.065	24.1951	0.218391	0.92365	5.065	16.4921	0.44186	0.675992	6.5729	80.9888	0.593747	0.783286	6.5729	51.78	0.316666	0.8013	5.065	48.593	0.431817	0.665658	5.065	102.097	0.44186	0.910994
5.3316	22.6829	0.229886	0.865921	5.3316	17.2222	0.465118	0.70592	6.9189	89.4727	0.625002	0.865338	6.9189	51.74	0.333335	0.800681	5.3316	66.2231	0.454546	0.907166	5.3316	93.185	0.465118	0.831471
5.5982	24.6098	0.241381	0.939481	5.5982	16.3809	0.488376	0.671438	7.2648	82.7092	0.656248	0.799925	7.2648	49.02	0.35	0.758589	5.5982	61.3058	0.477275	0.839805	5.5982	98.0665	0.488376	0.875027
5.8648	23.3415	0.252876	0.891064	5.8648	16.2381	0.511633	0.665582	7.6108	73.207	0.687503	0.708024	7.6108	50.14	0.366669	0.775921	5.8648	61.5	0.500004	0.842466	5.8648	112.073	0.511633	1
6.1313	22.7317	0.264367	0.867784	6.1313	17.1746	0.534882	0.703969	7.9567	68.5037	0.718749	0.662536	7.9567	50.86	0.383333	0.787063	6.1313	65.0382	0.522725	0.890934	6.1313	99.3115	0.534882	0.886136
6.3979	22.7805	0.275862	0.869647	6.3979	17.7936	0.55814	0.729343	8.3027	63.0781	0.750005	0.610062	8.3027	51.3	0.400003	0.793872	6.3979	65.8099	0.545454	0.901505	6.3979	83.835	0.55814	0.748043
6.6645	25.2683	0.287357	0.964619	6.6645	17.7778	0.581397	0.728692	8.6486	49.3394	0.781251	0.477188	8.6486	52.42	0.416667	0.811204	6.6645	54.7655	0.568183	0.750212	6.6645	84.3975	0.581397	0.753062
6.9311	25.9268	0.298852	0.989758	6.9311	18.5397	0.604655	0.759922	8.9945	43.7627	0.812497	0.423252	8.9945	55.62	0.433332	0.860724	6.9311	57.4008	0.590912	0.786312	6.9311	79.788	0.604655	0.711932
7.1977	25.6098	0.310347	0.977656	7.1977	19.0476	0.627913	0.780742	9.3405	39.0752	0.843752	0.377917	9.3405	54.04	0.450001	0.836274	7.1977	62.8585	0.613641	0.861075	7.1977	72.1347	0.627913	0.643643
7.4642	26.1951	0.321838	1	7.4642	19.6825	0.651162	0.806766	9.6864	40.2031	0.874998	0.388826	9.6864	51.44	0.466666	0.796038	7.4642	53.686	0.636361	0.735425	7.4642	65.9529	0.651162	0.588484
7.7308	23.6829	0.333333	0.904097	7.7308	19.9365	0.674419	0.817176	10.0324	32.9897	0.906253	0.319061	10.0324	50.98	0.483335	0.78892	7.7308	53.4597	0.65909	0.732325	7.7308	69.622	0.674419	0.621223
7.9974	24.0732	0.344828	0.918996	7.9974	20.4127	0.697677	0.836695	10.3783	31.1543	0.937499	0.30131	10.3783	50.66	0.5	0.783968	7.9974	54.7934	0.681819	0.750595	7.9974	73.3056	0.697677	0.654091
8.264	25	0.356324	0.954377	8.264	21.2064	0.720934	0.869226	10.7243	30.3103	0.968754	0.293147	10.7243	49.72	0.516669	0.769421	8.264	51.251	0.704548	0.702068	8.264	63.3559	0.720934	0.565312
8.5306	24.2927	0.367819	0.927376	8.5306	19.9841	0.744192	0.819128	11.0702	21.75	1	0.210356	11.0702	50.82	0.533334	0.786444	8.5306	53.5455	0.727277	0.7335	8.5306	66.6247	0.744192	0.594479
8.7971	22.7805	0.37931	0.869647	8.7971	21.6191	0.767441	0.886142					11.4162	48.18	0.550003	0.74559	8.7971	42.5	0.749998	0.582192	8.7971	68.6598	0.767441	0.612637
9.0637	24.4634	0.390805	0.933892	9.0637	22.0476	0.790699	0.903708					11.7621	46.66	0.566668	0.722067	9.0637	45.1818	0.772727	0.618929	9.0637	68.3207	0.790699	0.609612
9.3303	22.5366	0.4023	0.860336	9.3303	20.6825	0.813956	0.847755					12.108	45.36	0.583333	0.70195	9.3303	43.9318	0.795456	0.601805	9.3303	69.2282	0.813956	0.617709
9.5969	24.7805	0.413795	0.945998	9.5969	20.1429	0.837214	0.825634					12.454	43.92	0.600002	0.679666	9.5969	30.562	0.818185	0.418658	9.5969	60.6874	0.837214	0.541501
9.8634	24.1463	0.425286	0.921787	9.8634	20.4603	0.860463	0.838647					12.7999	42.34	0.616667	0.655215	9.8634	32.0238	0.840905	0.438682	9.8634	50.7058	0.860463	0.452437
10.13	24	0.436781	0.916202	10.13	17.6508	0.883721	0.723487					13.1459	43.62	0.633336	0.675023	10.13	34.6612	0.863634	0.474811	10.13	56.3959	0.883721	0.503209
10.3966	22.1463	0.448276	0.845437	10.3966	18.1111	0.906978	0.742355					13.4918	44.72	0.65	0.692046	10.3966	32.8543	0.886363	0.450059	10.3966	50.7588	0.906978	0.45291
10.6632	22.6829	0.459771	0.865921	10.6632	15.7936	0.930236	0.647365					13.8378	44.32	0.66667	0.685856	10.6632	37.0413	0.909092	0.507415	10.6632	44.026	0.930236	0.392835
10.9298	24.6098	0.471266	0.939481	10.9298	15.7778	0.953493	0.646714					14.1837	49.14	0.683334	0.760446	10.9298	33.6105	0.931821	0.460418	10.9298	45.3467	0.953493	0.404619
11.1963	22.8537	0.482757	0.872442	11.1963	15.1429	0.976742	0.62069					14.5297	50.14	0.700004	0.775921	11.1963	32.9091	0.954542	0.45081	11.1963	44.4305	0.976742	0.396444
11.4629	22.7561	0.494252	0.868716	11.4629	15.6508	1	0.641509					14.8756	49.68	0.716668	0.768802	11.4629	27.8192	0.977271	0.381085	11.4629	37	1	0.330143
11.7295	23.0488	0.505748	0.87989									15.2215	47.6	0.733333	0.736614	11.7295	23	1	0.315068
11.9961	21.561	0.517243	0.823093									15.5675	47.3	0.750002	0.731972
12.2627	21.1707	0.528738	0.808193									15.9134	47.94	0.766667	0.741876
12.5292	23	0.540229	0.878027									16.2594	46.58	0.783336	0.720829
12.7958	20.9024	0.551724	0.797951									16.6053	46.14	0.800001	0.71402
13.0624	21.4146	0.563219	0.817504									16.9513	44.42	0.81667	0.687403
13.329	19.6341	0.574714	0.749533									17.2972	43.46	0.833335	0.672547
13.5956	19.122	0.586209	0.729984									17.6431	43.74	0.85	0.67688
13.8621	17.9024	0.5977	0.683426									17.9891	40.72	0.866669	0.630145
14.1287	18.6098	0.609195	0.710431									18.335	39.38	0.883333	0.609409
14.3953	17.4634	0.62069	0.666667									18.681	37.06	0.900003	0.573507
14.6619	17.0976	0.632186	0.652702									19.0269	34.18	0.916667	0.528938
14.9285	17.0488	0.643681	0.650839									19.3729	35.3	0.933337	0.546271
15.195	17.7317	0.655172	0.676909									19.7188	33.84	0.950001	0.523677
15.4616	16.1463	0.666667	0.616386									20.0648	32.76	0.966671	0.506964
15.7282	16.5366	0.678162	0.631286									20.4107	31.84	0.983335	0.492727
15.9948	15.8049	0.689657	0.603353									20.7566	30.52	1	0.4723
16.2614	15.7317	0.701152	0.600559
16.5279	16.2927	0.712643	0.621975
16.7945	16.9512	0.724138	0.647113
17.0611	17.1707	0.735633	0.655493
17.3277	16.2195	0.747128	0.619181
17.5943	16.1707	0.758624	0.617318
17.8608	17.6829	0.770114	0.675046
18.1274	17.1707	0.781609	0.655493
18.394	17.2927	0.793105	0.66015
18.6606	16.0488	0.8046	0.612664
18.9272	17.0976	0.816095	0.652702
19.1937	16.878	0.827586	0.644319
19.4603	17.0244	0.839081	0.649908
19.7269	17.0244	0.850576	0.649908
19.9935	17.2683	0.862071	0.659219
20.2601	15.9024	0.873566	0.607075
20.5266	16.9512	0.885057	0.647113
20.7932	14.3415	0.896552	0.547488
21.0598	14.122	0.908047	0.539108
21.3264	13.0976	0.919543	0.500002
21.593	13.3171	0.931038	0.508381
21.8595	11.8537	0.942529	0.452516
22.1261	13.8537	0.954024	0.528866
22.3927	12.6341	0.965519	0.482308
22.6593	11.4878	0.977014	0.438548
22.9259	12.6098	0.988509	0.48138
23.1924	11.9024	1	0.454375
